# Supplementary material for: Context-independent essential regulatory interactions for apoptosis and hypertrophy in the cardiac signaling network
Source: PubMed Central journal article supplement (PMC5428364; doi:10.1038/s41598-017-00086-y), 2017-02-24
Supplement: 41598_2017_86_MOESM1_ESM.pdf [file 41598_2017_86_MOESM1_ESM.pdf]

# **Context-independent essential regulatory interactions for apoptosis and hypertrophy in the cardiac signaling network**

Jun Hyuk Kang<sup>1,\*</sup>, Ho-Sung Lee<sup>1,2,\*</sup>, Daebeom Park<sup>2</sup>, Yun-Won Kang<sup>2</sup>, Seon Myeong Kim<sup>2</sup>,  
Jeong-Ryeol Gong<sup>2</sup>, and Kwang-Hyun Cho<sup>1,2,†</sup>

<sup>1</sup>Graduate School of Medical Science and Engineering, Korea Advanced Institute of Science and Technology (KAIST), Daejeon, 34141, Republic of Korea

<sup>2</sup>Laboratory for Systems Biology and Bio-inspired Engineering, Department of Bio and Brain Engineering, Korea Advanced Institute of Science and Technology (KAIST), Daejeon, 34141, Republic of Korea

## **Supplementary Information**

---

\*These authors contributed equally to this study.

†Corresponding author. E-mail: [ckh@kaist.ac.kr](mailto:ckh@kaist.ac.kr), Phone: +82-42-350-4325, Fax: +82-42-350-4310, Web: <http://sbie.kaist.ac.kr/>.

## **Table of Contents**

### **I. Supplementary Figures**

**Supplementray Figure S1.** Therapeutic targets for treatment of apoptosis (\*) and hypertrophy (#).

**Supplementray Figure S2.** Effect of inhibition of epac or CaMKII on the cellular responses of cardiomyocytes under catecholamine stimulation.

**Supplementray Figure S3.** Analyses of 16 network motifs.

**Supplementray Figure S4.** Marginal distributions of parameters and the results of the distribution perturbation analysis.

**Supplementray Figure S5.** Analyses of EGFR network.

**Supplementray Figure S6.** Constitution of the normalized equation model when one node (i.e., Y) is activated by three different nodes (i.e., A, B, and C).

### **II. Supplementary Tables**

**Supplementray Table S1.** Differential equations of the cardiac signaling network model.

**Supplementray Table S2.** Represented regulatory process by parameters in the cardiac signaling network.

**Supplementray Table S3.** Type of equation and constraint of parameters in the cardiac signaling network model.

**Supplementray Table S4.** Verification data in the cardiac signaling network.

**Supplementray Table S5.** Verification results in the cardiac signaling network.

**Supplementray Table S6.** Results of the one-distribution perturbation analyses in the cardiac signaling network.

**Supplementray Table S7.** Results of two-distribution perturbation analysis when four

different response function types were applied in a combined manner.

**Supplementary Table S8.** Differential equations of the mathematical model of 16 network motifs.

**Supplementary Table S9.** Association of the network motifs and the dynamical features.

**Supplementary Table S10.** Dynamical features of the 16 network motifs.

**Supplementary Table S11.** Results of the distribution perturbation analysis of the 16 network motifs.

**Supplementary Table S12.** Differential equations of the EGFR model.

**Supplementary Table S13.** Relationship between interactions and parameters in the EGFR model.

**Supplementary Table S14.** Results of the distribution perturbation analysis of the EGFR network.

### **III. Supplementary Texts**

**Supplementary Text S1.** Analysis of network motifs.

**Supplementary Text S2.** Analysis of the EGFR network.

**Supplementary Text S3.** Normalized equation modeling when one node is regulated by more than two nodes.

### **IV. Supplementary Data Sets**

**Supplementary Data Set S1.** Experimental database for the cardiac signaling pathways.

**Supplementary Data Set S2.** Experimental evidence of links in the cardiac signaling network.

**Supplementary Data Set S3.** Results of the distribution perturbation analyses for apoptosis in the cardiac signaling network.

**Supplementary Data Set S4.** Results of the distribution perturbation analyses for

hypertrophy in the cardiac signaling network.

## I. Supplementary Figures

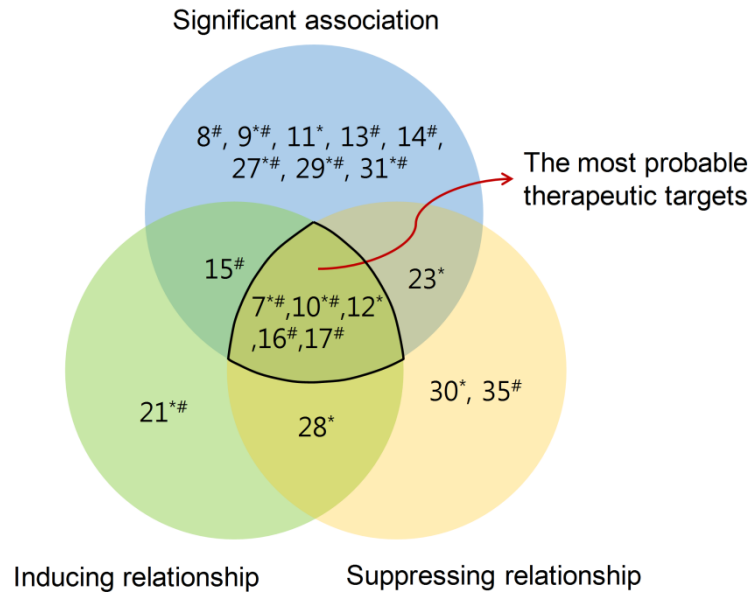

**Supplementary Figure S1.** Therapeutic targets for treatment of apoptosis (\*) and hypertrophy (#).

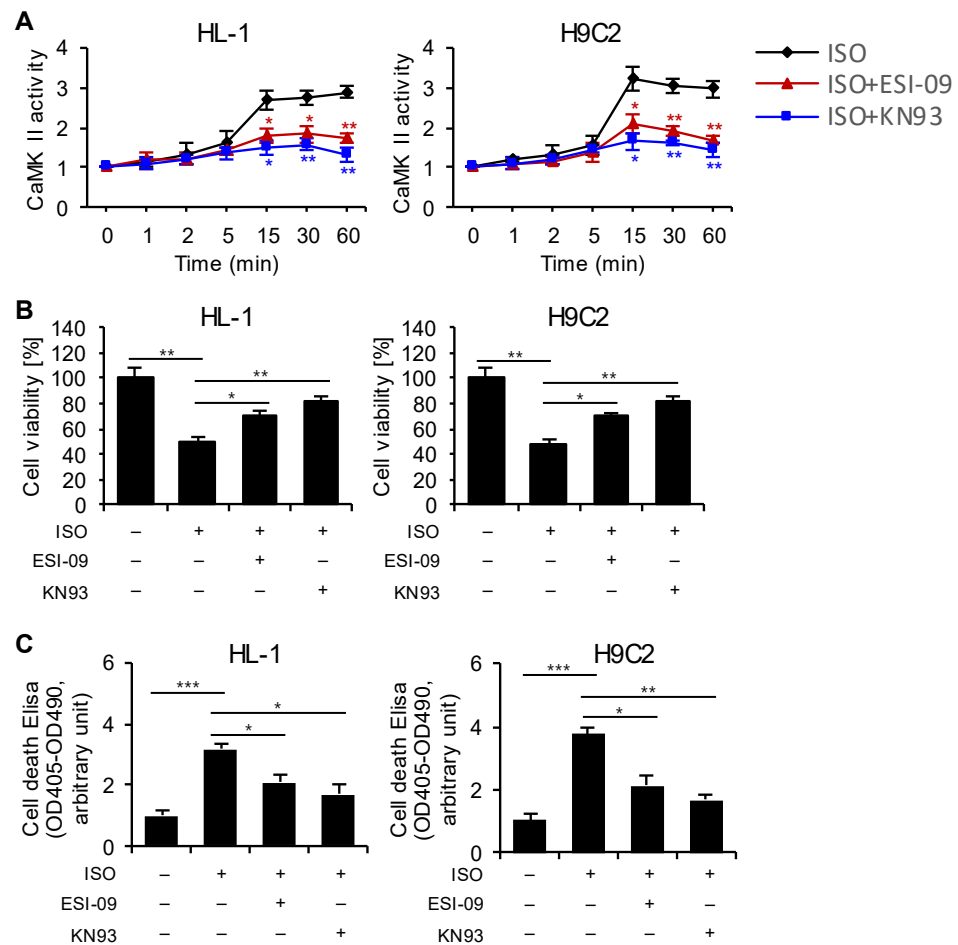

**Supplementary Figure S2.** Effect of inhibition of epac or CaMKII on the cellular responses of cardiomyocytes under catecholamine stimulation. (A) Graphs of the CaMKII activity in HL-1 and H9C2 cells treated with isoproterenol (ISO, a synthetic catecholamine that stimulates beta-adrenergic receptor signaling, 10  $\mu$ M) for indicated time in the presence or absence of ESI-09 (an epac inhibitor, 10  $\mu$ M) or KN93 (a CaMKII inhibitor, 5  $\mu$ M) determined using a CaMKII assay. Red asterisks, significant differences between ISO-treated and ISO-ESI-09 co-treated cells; blue asterisks, significant differences between ISO-treated and ISO-KN93 co-treated cells. (B) Graphs of the percent of viable cells treated with ISO (10  $\mu$ M) for 24 hours after the one-hour pre-treatment with ESI-09 (10  $\mu$ M) or KN93 (5  $\mu$ M) determined using a CCK-8 assay. (C) Graphs of the percent of apoptotic cells treated with ISO (10  $\mu$ M) for 24 hours after the one-hour pre-treatment with ESI-09 (10  $\mu$ M) or KN93 (5  $\mu$ M) determined using a cell death ELISA assay. All data represent the mean  $\pm$  S.E.M. of three biological replicates. \*,  $p < 0.05$ ; \*\*,  $p < 0.01$ ; \*\*\*,  $p < 0.001$ ; \*\*\*\*,  $p < 0.0001$ ; Student's *t* test.

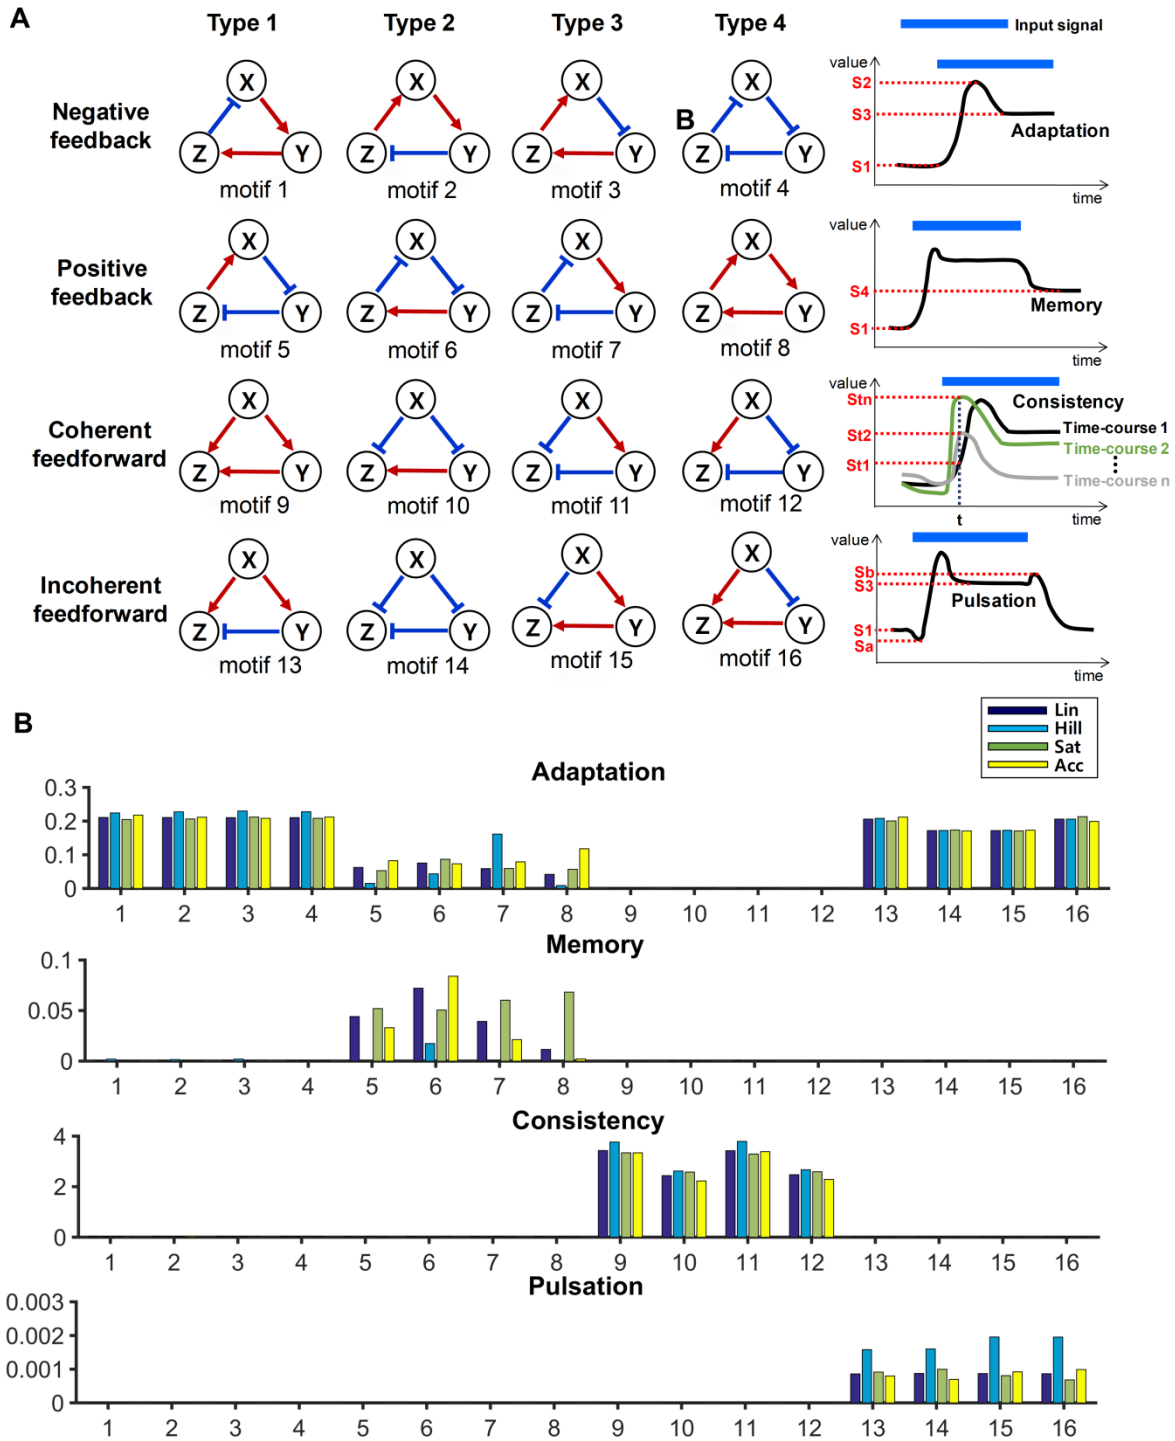

**Supplementary Figure S3.** Analyses of 16 network motifs. (A) Network structure of 16 network motifs. Dynamical features to be analyzed are demonstrated in the right side. Blue bars represents the duration of the given input signal. (B) Dynamical features of the 16 network motifs. The numbers marked on x-axis is the motif number. The value of the y-axis means relative portion of parameters that generate the dynamics of interest. For a detailed explanation, see Supplementary Texts.

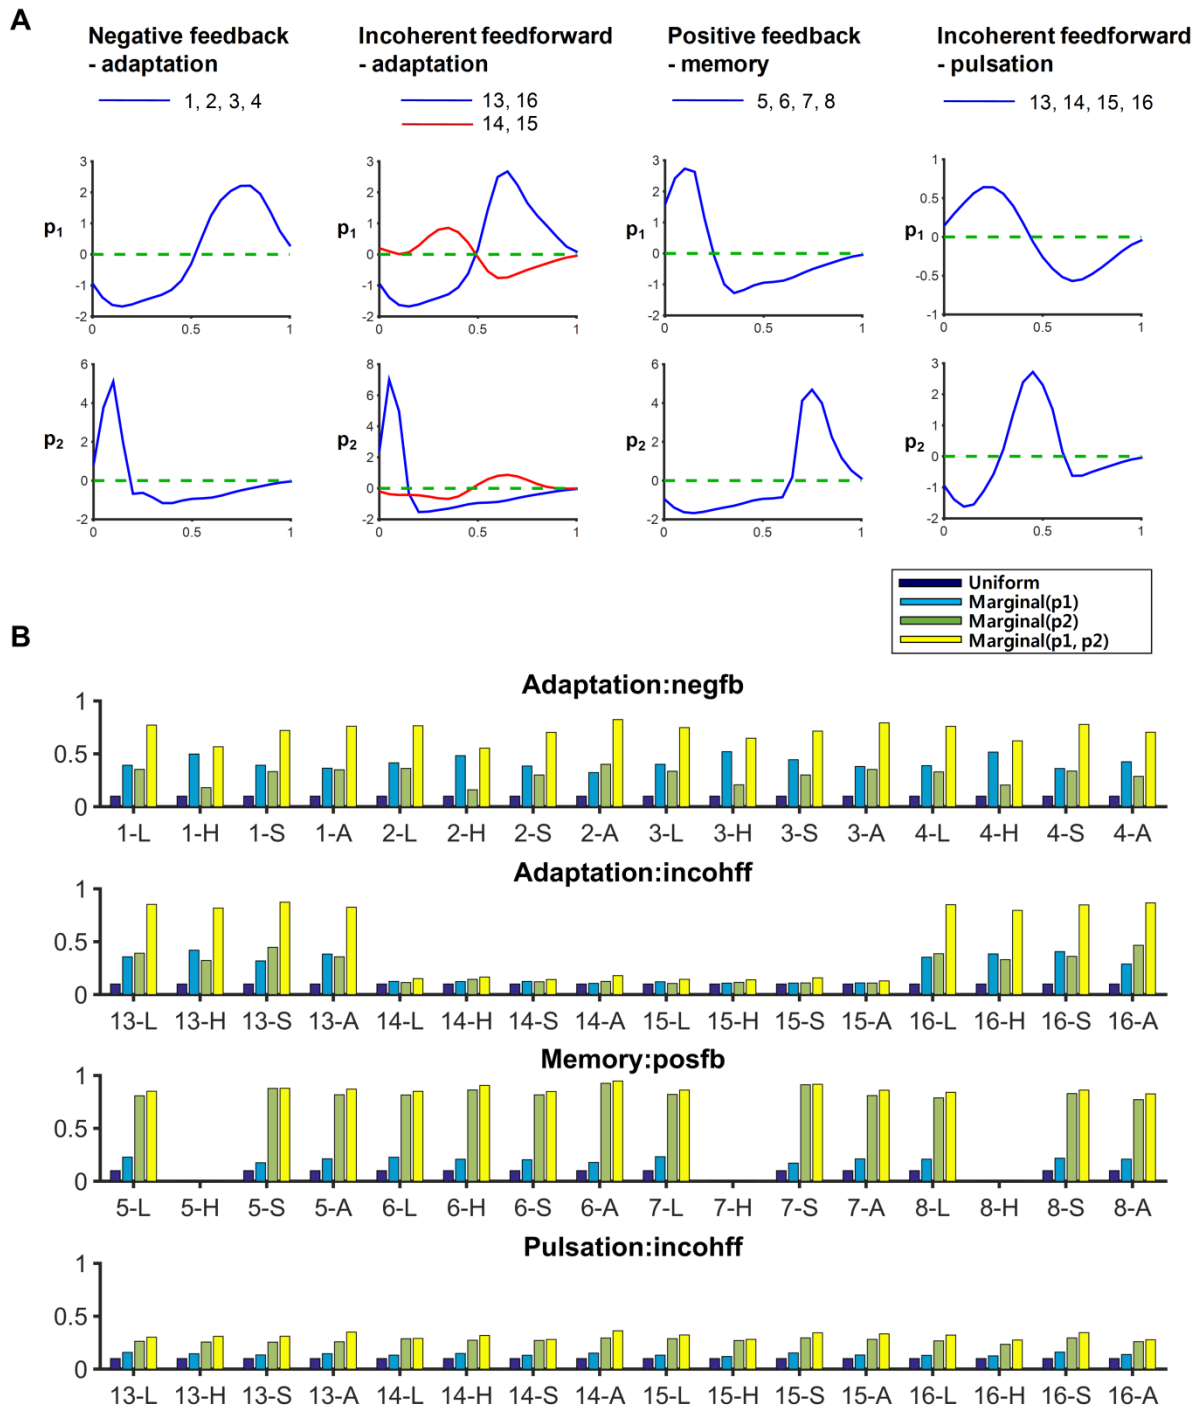

**Supplementray Figure S4.** Marginal distributions of parameters and the results of the distribution perturbation analysis. (A) Shape of marginal distribution for four associations of the network structure and dynamics (B) The results of distribution perturbation analysis. The label (A-B) on the x-axis means type A with function B used. B is one among L(Lin), H(Hill), S(Sat), A(Acc). For a detailed explanation, see Supplementary Texts.



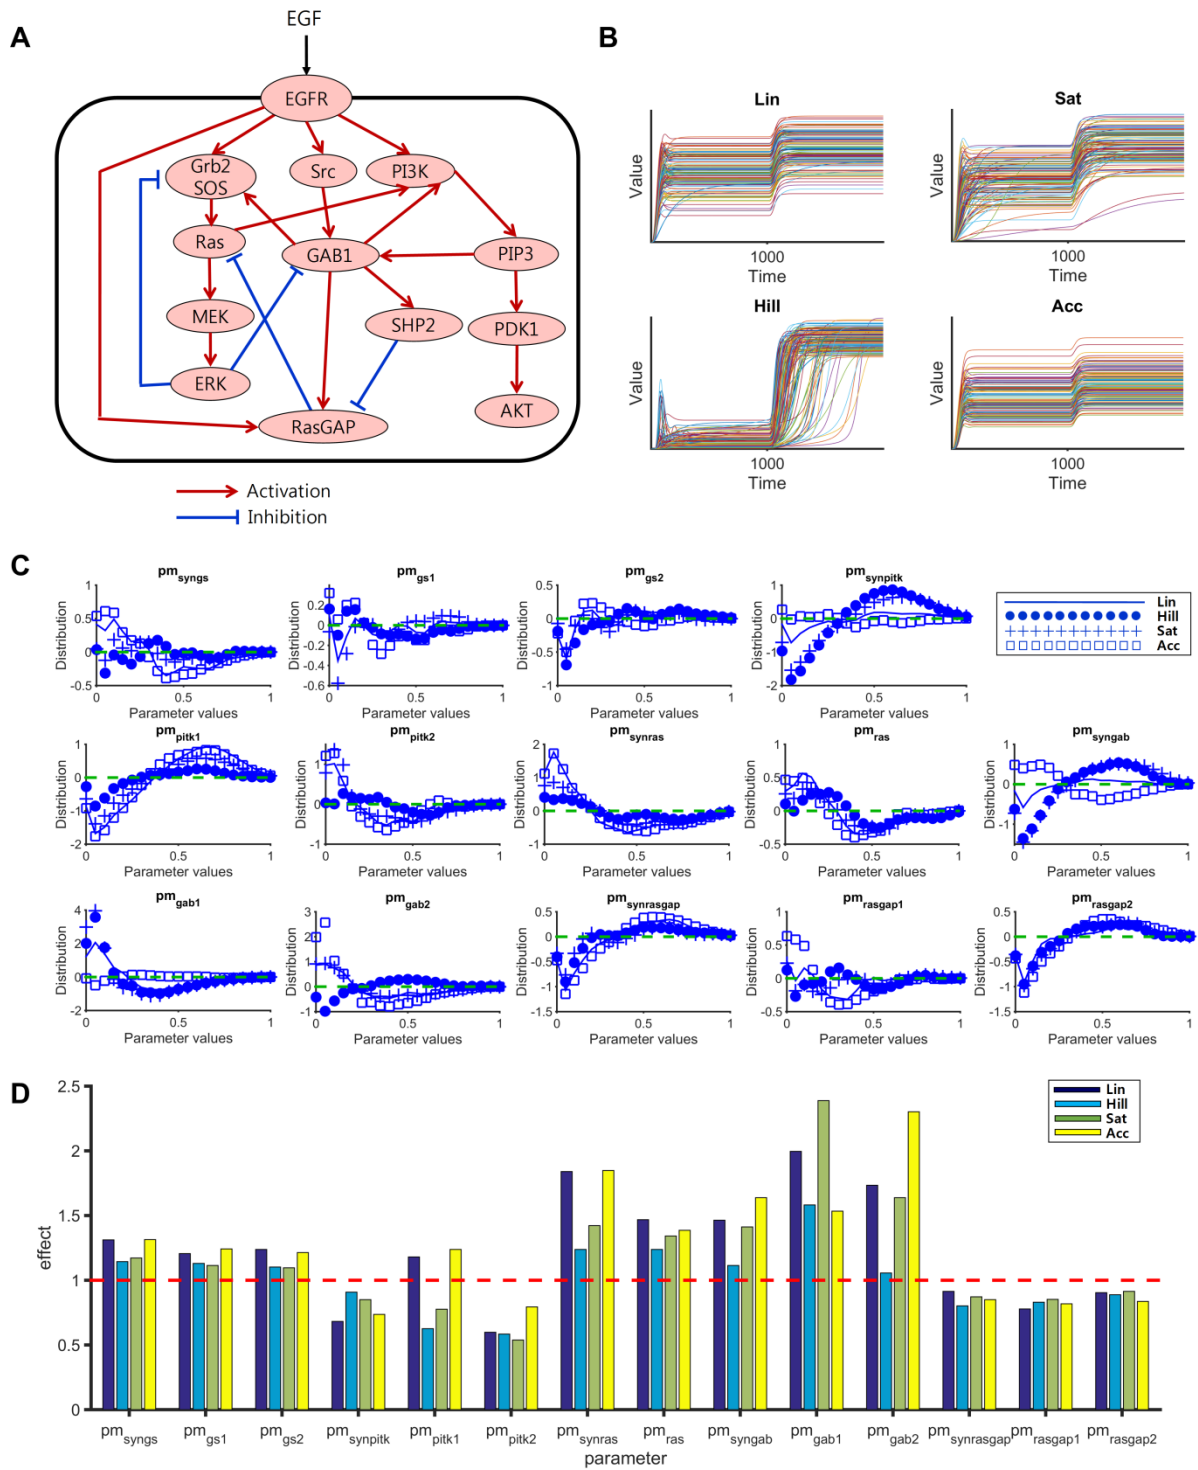

**Supplementary Figure S5.** Analyses of EGFR network. (A) Representation of EGFR network. (B) Resistance to the MEK inhibitor was identified. (C) Marginal distributions of the parameters that are associated with MEK inhibitor resistance. (D) The results of one distribution perturbation analysis. For detailed a explanation, see Supplementary Texts.

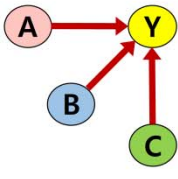

$$\begin{aligned} \frac{dY}{dt} = & p_2 \times f_{act}(A) + p_3 \times f_{act}(B) + (1 - p_1 - p_2 - p_3) \times f_{act}(C) \\ & + p_{ab} \times f_{act}(A) \times f_{act}(B) + p_{bc} \times f_{act}(B) \times f_{act}(C) + p_{ca} \times f_{act}(C) \times f_{act}(A) \\ & + p_{abc} \times f_{act}(A) \times f_{act}(B) \times f_{act}(C) - Y \end{aligned}$$

$$p_{ab} = p_2 \times p_3, \quad p_{bc} = p_3 \times (1 - p_1 - p_2 - p_3), \quad p_{ca} = (1 - p_1 - p_2 - p_3) \times p_2$$

$$p_4 = \frac{p_{ab}}{p_{ab} + p_{bc} + p_{ca}} \times (1 - p_1) \times p_1, \quad p_5 = \frac{p_{bc}}{p_{ab} + p_{bc} + p_{ca}} \times (1 - p_1) \times p_1$$

$$p_6 = \frac{p_{ca}}{p_{ab} + p_{bc} + p_{ca}} \times (1 - p_1) \times p_1, \quad p_7 = p_1 \times p_1$$

**Supplementary Figure S6.** Constitution of the normalized equation model when one node (i.e., Y) is activated by three different nodes (i.e., A, B, C). For a detailed explanation, see Supplementary Texts.

## Supplementary Tables

**Supplementray Table S1.** Differential equations of the cardiac signaling network model.

| Eq. no. | Differential equation                                                                                                                     |
|---------|-------------------------------------------------------------------------------------------------------------------------------------------|
| (1)     | $\frac{d[BAR]}{dt} = ISO \times (1 - BARp - BARd) - BAR$                                                                                  |
| (2)     | $\frac{d[BARp]}{dt} = pm_1 \times f_{act}(BAR) \times f_{act}(PKA) - BARp$                                                                |
| (3)     | $\frac{d[BARd]}{dt} = pm_2 \times f_{act}(BAR + BARp) \times f_{act}(bARKnPI3K) - BARd$                                                   |
| (4)     | $\frac{d[bARK]}{dt} = f_{act}(Gbg) - bARK$                                                                                                |
| (5)     | $\frac{d[Gs]}{dt} = f_{act}(BAR) - Gs$                                                                                                    |
| (6)     | $\frac{d[Gi]}{dt} = f_{act}(BARp) - Gi$                                                                                                   |
| (7)     | $\frac{d[AC]}{dt} = pm_3 \times f_{act}(Gs) - (ADD - pm_3) \times f_{inh}(Gi) + SYN \times f_{act}(Gs) \times f_{inh}(Gi) - AC$           |
| (8)     | $\frac{d[cAMP]}{dt} = pm_4 \times f_{act}(AC) + (ADD - pm_4) \times f_{inh}(PDE34) + SYN \times f_{act}(AC) \times f_{inh}(PDE34) - cAMP$ |
| (9)     | $\frac{d[PKA]}{dt} = f_{act}(cAMP) - PKA$                                                                                                 |

|      |                                                                                                                                                 |
|------|-------------------------------------------------------------------------------------------------------------------------------------------------|
| (10) | $\frac{d[epac]}{dt} = f_{act}(cAMP) - epac$                                                                                                     |
| (11) | $\frac{d[PDE34]}{dt} = pm_5 \times f_{act}(PKA) - (ADD - pm_5) \times f_{act}(PKC) + SYN \times f_{act}(PKA) \times f_{act}(PKC) - PDE34$       |
| (12) | $\frac{d[CREB]}{dt} = pm_6 \times f_{act}(PKA) - (ADD - pm_6) \times f_{act}(MSK1) + SYN \times f_{act}(PKA) \times f_{act}(MSK1) - CREB$       |
| (13) | $\frac{d[aAR]}{dt} = PE - aAR$                                                                                                                  |
| (14) | $\frac{d[Gq]}{dt} = pm_7 \times f_{act}(aAR) - (ADD - pm_7) \times f_{inh}(RGS4) + SYN \times f_{act}(aAR) \times f_{inh}(RGS4) - Gq$           |
| (15) | $\frac{d[Gbg]}{dt} = \frac{(f_{act}(Gi) + f_{act}(Gq))}{2} - Gbg$                                                                               |
| (16) | $\frac{d[PLC]}{dt} = f_{act}(Gq) - PLC$                                                                                                         |
| (17) | $\frac{d[IP3]}{dt} = f_{act}(PLC) - IP3$                                                                                                        |
| (18) | $\frac{d[DAG]}{dt} = f_{act}(PLC) - DAG$                                                                                                        |
| (19) | $\frac{d[PKC]}{dt} = pm_8 \times f_{act}(DAG) \times f_{act}(Ca) + (1 - pm_8) \times f_{act}(DAG) \times f_{act}(Ca) \times f_{act}(CaN) - PKC$ |
| (20) | $\frac{d[TAK1]}{dt} = f_{act}(PKC) - TAK1$                                                                                                      |

|      |                                                                                                                                                                                                                                                                                                                                                                                       |
|------|---------------------------------------------------------------------------------------------------------------------------------------------------------------------------------------------------------------------------------------------------------------------------------------------------------------------------------------------------------------------------------------|
| (21) | $PKAPI3K = pm_9 \times f_{act}(PKA) \times f_{inh}(PI3Krcr) + (1 - pm_9) \times f_{act}(PKA)$ $\frac{d[Ca]}{dt} = pm_{10} \times f_{act}(IP3) + (ADD - pm_{10}) \times PKAPI3K + SYN \times f_{act}(IP3) \times PKAPI3K - Ca$                                                                                                                                                         |
| (22) | $\frac{d[CaM]}{dt} = f_{act}(Ca) - CaM$                                                                                                                                                                                                                                                                                                                                               |
| (23) | $epacPKC = pm_{11} \times f_{act}(epac) \times f_{act}(PKC) + (1 - pm_{11}) \times f_{act}(epac)$ $\frac{d[CaMK]}{dt} = pm_{12} \times f_{act}(CaM) \times epacPKC + (1 - pm_{12}) \times f_{act}(CaM) - CaMK$                                                                                                                                                                        |
| (24) | $\frac{d[CaN]}{dt} = f_{act}(CaM) - CaN$                                                                                                                                                                                                                                                                                                                                              |
| (25) | $\frac{d[HDAC]}{dt} = pm_{13} \times f_{inh}(CaMK) + pm_{14} \times f_{inh}(PKC) + (ADD - pm_{13} - pm_{14}) \times f_{act}(PKA) +$ $pm_{hdac12} \times f_{inh}(CaMK) \times f_{inh}(PKC) + pm_{hdac23} \times f_{inh}(PKC) \times f_{act}(PKA) +$ $pm_{hdac31} \times f_{act}(PKA) \times f_{inh}(CaMK) + SYN_3 \times f_{inh}(CaMK) \times f_{inh}(PKC) \times f_{act}(PKA) - HDAC$ |

|      |                                                                                                                                                                                                                                                                                                                                                                                                                                                                                                                                                                                                                                                                                                                                                                                                                                                                                                                                                                                             |
|------|---------------------------------------------------------------------------------------------------------------------------------------------------------------------------------------------------------------------------------------------------------------------------------------------------------------------------------------------------------------------------------------------------------------------------------------------------------------------------------------------------------------------------------------------------------------------------------------------------------------------------------------------------------------------------------------------------------------------------------------------------------------------------------------------------------------------------------------------------------------------------------------------------------------------------------------------------------------------------------------------|
| (26) | $\frac{d[NFATnuc]}{dt} = pm_{15} \times f_{act}(CaN) + pm_{16} \times f_{inh}(JNK) + pm_{17} \times f_{inh}(p38)$ $+ (ADD - pm_{15} - pm_{16} - pm_{17}) \times f_{inh}(GSK3B) + pm_{nfatnuc12} \times f_{act}(CaN) \times f_{inh}(JNK) +$ $pm_{nfatnuc13} \times f_{act}(CaN) \times f_{inh}(p38) + pm_{nfatnuc14} \times f_{act}(CaN) \times f_{inh}(GSK3B) +$ $pm_{nfatnuc23} \times f_{inh}(JNK) \times f_{inh}(p38) + pm_{nfatnuc24} \times f_{inh}(JNK) \times f_{inh}(GSK3B) +$ $pm_{nfatnuc34} \times f_{inh}(p38) \times f_{inh}(GSK3B) + pm_{nfatnuc123} \times f_{act}(CaN) \times f_{inh}(JNK) \times f_{inh}(p38)$ $+ pm_{nfatnuc124} \times f_{act}(CaN) \times f_{inh}(JNK) \times f_{inh}(GSK3B)$ $+ pm_{nfatnuc134} \times f_{act}(CaN) \times f_{inh}(p38) \times f_{inh}(GSK3B)$ $+ pm_{nfatnuc234} \times f_{inh}(JNK) \times f_{inh}(p38) \times f_{inh}(GSK3B)$ $+ SYN_4 \times f_{act}(CaN) \times f_{inh}(JNK) \times f_{inh}(p38) \times f_{inh}(GSK3B) - NFATnuc$ |
| (27) | $AP1 = 0.5 \times cFos \times cJun + 0.5 \times cJun \times cJun$ $cFoscJunGSK3B = pm_{18} \times f_{act}(AP1) + (ADD - pm_{18}) \times f_{inh}(GSK3B) + SYN \times f_{act}(AP1) \times f_{inh}(GSK3B)$ $\frac{d[NFATact]}{dt} = pm_{19} \times f_{act}(NFATnuc) \times cFoscJunGSK3B + (1 - pm_{19}) \times f_{act}(NFATnuc) - NFATact$                                                                                                                                                                                                                                                                                                                                                                                                                                                                                                                                                                                                                                                    |
| (28) | $\frac{d[Src]}{dt} = pm_{20} \times f_{act}(Gbg) \times f_{act}(CaN) + (1 - pm_{20}) \times f_{act}(Gbg) - Src$                                                                                                                                                                                                                                                                                                                                                                                                                                                                                                                                                                                                                                                                                                                                                                                                                                                                             |
| (29) | $\frac{d[Shc]}{dt} = f_{act}(Src) - Shc$                                                                                                                                                                                                                                                                                                                                                                                                                                                                                                                                                                                                                                                                                                                                                                                                                                                                                                                                                    |
| (30) | $\frac{d[Grb2Sos]}{dt} = pm_{21} \times f_{inh}(ERK12) - (ADD - pm_{21}) \times f_{act}(Shc) + SYN \times f_{inh}(ERK12) \times f_{act}(Shc) - Grb2Sos$                                                                                                                                                                                                                                                                                                                                                                                                                                                                                                                                                                                                                                                                                                                                                                                                                                     |
| (31) | $\frac{d[Ras]}{dt} = f_{act}(Grb2Sos) - Ras$                                                                                                                                                                                                                                                                                                                                                                                                                                                                                                                                                                                                                                                                                                                                                                                                                                                                                                                                                |

|      |                                                                                                                                                                                                                                                                                                                                                                                                                      |
|------|----------------------------------------------------------------------------------------------------------------------------------------------------------------------------------------------------------------------------------------------------------------------------------------------------------------------------------------------------------------------------------------------------------------------|
| (32) | $\frac{d[Rac]}{dt} = f_{act}(Ras) - Rac$                                                                                                                                                                                                                                                                                                                                                                             |
| (33) | $\begin{aligned} \frac{d[Raf1]}{dt} = & pm_{22} \times f_{act}(Ras) + pm_{23} \times f_{act}(PKC) + (ADD - pm_{22} - pm_{23}) \times f_{inh}(PKA) + \\ & pm_{raf12} \times f_{act}(Ras) \times f_{act}(PKC) + pm_{raf23} \times f_{act}(PKC) \times f_{inh}(PKA) + pm_{raf31} \times f_{inh}(PKA) \times f_{act}(Ras) + \\ & SYN_3 \times f_{act}(Ras) \times f_{act}(PKC) \times f_{inh}(PKA) - Raf1 \end{aligned}$ |
| (34) | $\frac{d[MEKK1]}{dt} = f_{act}(Rac) - MEKK1$                                                                                                                                                                                                                                                                                                                                                                         |
| (35) | $\frac{d[MEKK234]}{dt} = f_{act}(Rac) - MEKK234$                                                                                                                                                                                                                                                                                                                                                                     |
| (36) | $\frac{d[MEKK11]}{dt} = f_{act}(Rac) - MEKK11$                                                                                                                                                                                                                                                                                                                                                                       |
| (37) | $\begin{aligned} \frac{d[MEK12]}{dt} = & pm_{24} \times f_{act}(Raf1) - (ADD - pm_{24}) \times f_{act}(MEKK1) \\ & + SYN \times f_{act}(Raf1) \times f_{act}(MEKK1) - MEK12 \end{aligned}$                                                                                                                                                                                                                           |
| (38) | $\begin{aligned} \frac{d[MEK4]}{dt} = & pm_{25} \times f_{act}(MEKK1) - (ADD - pm_{25}) \times f_{act}(MEKK234) \\ & + SYN \times f_{act}(MEKK1) \times f_{act}(MEKK234) - MEK4 \end{aligned}$                                                                                                                                                                                                                       |
| (39) | $\begin{aligned} \frac{d[MEK7]}{dt} = & pm_{26} \times f_{act}(MEKK234) - (ADD - pm_{26}) \times f_{act}(MEKK11) \\ & + SYN \times f_{act}(MEKK234) \times f_{act}(MEKK11) - MEK7 \end{aligned}$                                                                                                                                                                                                                     |

|      |                                                                                                                                                                                                                                                                                                                                                                                                                            |
|------|----------------------------------------------------------------------------------------------------------------------------------------------------------------------------------------------------------------------------------------------------------------------------------------------------------------------------------------------------------------------------------------------------------------------------|
| (40) | $\frac{d[MEK36]}{dt} = pm_{27} \times f_{act}(TAK1) - (ADD - pm_{27}) \times f_{act}(MEKK11) + SYN \times f_{act}(TAK1) \times f_{act}(MEKK11) - MEK36$                                                                                                                                                                                                                                                                    |
| (41) | $\frac{d[ERK12]}{dt} = pm_{28} \times f_{act}(Gbg) - (ADD - pm_{28}) \times f_{act}(MEK12) + SYN \times f_{act}(Gbg) \times f_{act}(MEK12) - ERK12$                                                                                                                                                                                                                                                                        |
| (42) | $\begin{aligned} \frac{d[JNK]}{dt} = & pm_{29} \times f_{act}(CaN) + pm_{30} \times f_{act}(MEK4) + (ADD - pm_{29} - pm_{30}) \times f_{act}(MEK7) + \\ & pm_{jnk12} \times f_{act}(CaN) \times f_{act}(MEK4) + pm_{jnk23} \times f_{act}(MEK4) \times f_{act}(MEK7) + \\ & pm_{jnk31} \times f_{act}(MEK7) \times f_{act}(CaN) + SYN_3 \times f_{act}(CaN) \times f_{act}(MEK4) \times f_{act}(MEK7) - JNK \end{aligned}$ |
| (43) | $\frac{d[p38]}{dt} = pm_{31} \times f_{act}(MEK36) - (ADD - pm_{31}) \times f_{act}(MEK4) + SYN \times f_{act}(MEK36) \times f_{act}(MEK4) - p38$                                                                                                                                                                                                                                                                          |
| (44) | $\begin{aligned} \frac{d[PI3Krcr]}{dt} &= bARKnPI3K + Grb2nPI3K - PI3Krcr \\ PI3Knrct &= 1 - PI3Krcr \end{aligned}$                                                                                                                                                                                                                                                                                                        |
| (45) | $\frac{d[Grb2nPI3K]}{dt} = f_{act}(Grb2Sos) \times PI3Knrct - Grb2nPI3K$                                                                                                                                                                                                                                                                                                                                                   |
| (46) | $\frac{d[bARKnPI3K]}{dt} = f_{act}(bARK) \times PI3Knrct - bARKnPI3K$                                                                                                                                                                                                                                                                                                                                                      |
| (47) | $\frac{d[Akt]}{dt} = f_{act}(PI3Krcr) - Akt$                                                                                                                                                                                                                                                                                                                                                                               |
| (48) | $\frac{d[GSK3B]}{dt} = f_{inh}(Akt) - GSK3B$                                                                                                                                                                                                                                                                                                                                                                               |



|      |                                                                                                                                                                                                                                                                                                                                                                                                                                           |
|------|-------------------------------------------------------------------------------------------------------------------------------------------------------------------------------------------------------------------------------------------------------------------------------------------------------------------------------------------------------------------------------------------------------------------------------------------|
| (49) | $\frac{d[cGMP]}{dt} = pm_{32} \times f_{inh}(PDE5) - (ADD - pm_{32}) \times f_{act}(sGC) + SYN \times f_{inh}(PDE5) \times f_{act}(sGC) - cGMP$                                                                                                                                                                                                                                                                                           |
| (50) | $\frac{d[MEF2]}{dt} = pm_{33} \times f_{act}(p38) - (ADD - pm_{33}) \times f_{inh}(HDAC) + SYN \times f_{act}(p38) \times f_{inh}(HDAC) - MEF2$                                                                                                                                                                                                                                                                                           |
| (51) | $\begin{aligned} \frac{d[GATA4]}{dt} = & pm_{34} \times f_{act}(ERK12) + pm_{35} \times f_{act}(p38) + (ADD - pm_{34} - pm_{35}) \times f_{inh}(GSK3B) + \\ & pm_{gata12} \times f_{act}(ERK12) \times f_{act}(p38) + pm_{gata23} \times f_{act}(p38) \times f_{inh}(GSK3B) + \\ & pm_{gata31} \times f_{inh}(GSK3B) \times f_{act}(ERK12) + SYN_3 \times f_{act}(ERK12) \times f_{act}(p38) \times f_{inh}(GSK3B) - GATA4 \end{aligned}$ |
| (52) | $\frac{d[cFos]}{dt} = f_{act}(ERK12) - cFos$                                                                                                                                                                                                                                                                                                                                                                                              |
| (53) | $\frac{d[cJun]}{dt} = pm_{36} \times f_{act}(JNK) - (ADD - pm_{36}) \times f_{act}(p38) + SYN \times f_{act}(JNK) \times f_{act}(p38) - cJun$                                                                                                                                                                                                                                                                                             |
| (54) | $\frac{d[MSK1]}{dt} = pm_{37} \times f_{act}(ERK12) - (ADD - pm_{37}) \times f_{act}(p38) + SYN \times f_{act}(ERK12) \times f_{act}(p38) - MSK1$                                                                                                                                                                                                                                                                                         |
| (55) | $\frac{d[NOS]}{dt} = f_{act}(Akt) - NOS$                                                                                                                                                                                                                                                                                                                                                                                                  |
| (56) | $\frac{d[sGC]}{dt} = f_{act}(NOS) - sGC$                                                                                                                                                                                                                                                                                                                                                                                                  |
| (57) | $\frac{d[PKG]}{dt} = f_{act}(cGMP) - PKG$                                                                                                                                                                                                                                                                                                                                                                                                 |
| (58) | $\frac{d[PDE5]}{dt} = f_{act}(PKG) - PDE5$                                                                                                                                                                                                                                                                                                                                                                                                |

|      |                                                                   |
|------|-------------------------------------------------------------------|
| (59) | $\frac{d[RG\text{S}4]}{dt} = f_{act}(PKG) - RG\text{S}4$          |
| (50) | $Apoptosis = \frac{[CaMK] + [JNK] + [p38] - [CREB] - [ERK12]}{5}$ |
| (51) | $Hypertrophy = \frac{[NFATact] + [MEF2] + [GATA4]}{5}$            |

ADD is set to be 0.8 and SYN is 0.2.  $SYN_3 = SYN \times SYN$ ,  $SYN_4 = SYN \times SYN \times SYN$

**Supplementray Table S2.** Represented regulatory process by parameters in the cardiac signaling network.

| Parameter no.    | Represented link or biological process by the parameter |
|------------------|---------------------------------------------------------|
| pm <sub>1</sub>  | maximal degree of BAR phosphorylation                   |
| pm <sub>2</sub>  | maximal degree of BAR desensitization                   |
| pm <sub>3</sub>  | Gs/Gi → AC                                              |
| pm <sub>4</sub>  | AC/PDE34 → cAMP                                         |
| pm <sub>5</sub>  | PKA/PKC → PDE34                                         |
| pm <sub>6</sub>  | PKA/MSK1 → CREB                                         |
| pm <sub>7</sub>  | αAR/RGS4 → Gq                                           |
| pm <sub>8</sub>  | (DAG & Ca)/(DAG & Ca & CaN) → PKC                       |
| pm <sub>9</sub>  | (PKA & PI3K)/PKA → activated PKA for Ca                 |
| pm <sub>10</sub> | IP3/activated PKA → Ca                                  |
| pm <sub>11</sub> | (epac & PKC)/epac → activated epac for CaMK             |
| pm <sub>12</sub> | (CaM & activated epac)/CaM → CaMK                       |
| pm <sub>13</sub> | CaMK/(PKC, PKA) → HDAC                                  |
| pm <sub>14</sub> | PKC/(CaMK, PKA) → HDAC                                  |
| pm <sub>15</sub> | CaN/(JNK, p38) → NFATnuc                                |
| pm <sub>16</sub> | JNK/(CaN, p38) → NFATnuc                                |
| pm <sub>17</sub> | p38/(CaN, JNK) → NFATnuc                                |
| pm <sub>18</sub> | API/GSK3B → activated API                               |
| pm <sub>19</sub> | (NFATnuc & activated API)/NFATnuc → NFATact             |
| pm <sub>20</sub> | (Gbg & CaN)/Gbg → Src                                   |
| pm <sub>21</sub> | ERK12/Shc → Grb2Sos                                     |
| pm <sub>22</sub> | Ras/(PKC, PKA) → Raf1                                   |
| pm <sub>23</sub> | PKC/(Ras, PKA) → Raf1                                   |
| pm <sub>24</sub> | Raf1/MEKK1 → MEK12                                      |
| pm <sub>25</sub> | MEKK1/MEKK234 → MEK4                                    |
| pm <sub>26</sub> | MEKK234/MEKK11 → cJun                                   |
| pm <sub>27</sub> | TAK1/MEKK11 → MEK36                                     |
| pm <sub>28</sub> | Gbg/MEK12 → ERK12                                       |
| pm <sub>29</sub> | CaN/(MEK4, MEK7) → JNK                                  |
| pm <sub>30</sub> | MEK4/(CaN, MEK7) → JNK                                  |
| pm <sub>31</sub> | MEK36/MEK4 → p38                                        |

|                  |                            |
|------------------|----------------------------|
| pm <sub>32</sub> | PDE5/sGC → cGMP            |
| pm <sub>33</sub> | p38/HDAC → MEF2            |
| pm <sub>34</sub> | ERK12/(p38, GSK3B) → GATA4 |
| pm <sub>35</sub> | p38/(ERK12, GSK3B) → GATA4 |
| pm <sub>36</sub> | JNK/p38 → cJun             |
| pm <sub>37</sub> | ERK12/p38 → MSK1           |

Note that the mark ' → ' represents influence that is either activation or inhibition.

**Supplementray Table S3.** Type of equation and constraint of parameters in the cardiac signaling network model.

| Eq no. | Dependent variable | Related parameter                   | Equation type <sup>a</sup> | Constraints of parameter                                                                                                                                                                                                                                                                                                                                                                                                                                     |
|--------|--------------------|-------------------------------------|----------------------------|--------------------------------------------------------------------------------------------------------------------------------------------------------------------------------------------------------------------------------------------------------------------------------------------------------------------------------------------------------------------------------------------------------------------------------------------------------------|
| (2)    | BARp <sup>b</sup>  | pm <sub>1</sub>                     | sub                        | $0 \leq pm_1 \leq 1$                                                                                                                                                                                                                                                                                                                                                                                                                                         |
| (3)    | BARd <sup>b</sup>  | pm <sub>2</sub>                     | sub                        | $0 \leq pm_2 \leq 1$                                                                                                                                                                                                                                                                                                                                                                                                                                         |
| (7)    | AC                 | pm <sub>3</sub>                     | add                        | $0 \leq pm_3 \leq 1 - SYN$                                                                                                                                                                                                                                                                                                                                                                                                                                   |
| (8)    | cAMP               | pm <sub>4</sub>                     | add                        | $0 \leq pm_4 \leq 1 - SYN$                                                                                                                                                                                                                                                                                                                                                                                                                                   |
| (11)   | PDE34              | pm <sub>5</sub>                     | add                        | $0 \leq pm_5 \leq 1 - SYN$                                                                                                                                                                                                                                                                                                                                                                                                                                   |
| (12)   | CREB               | pm <sub>6</sub>                     | add                        | $0 \leq pm_6 \leq 1 - SYN$                                                                                                                                                                                                                                                                                                                                                                                                                                   |
| (14)   | Gq                 | pm <sub>7</sub>                     | add                        | $0 \leq pm_7 \leq 1 - SYN$                                                                                                                                                                                                                                                                                                                                                                                                                                   |
| (19)   | PKC <sup>c</sup>   | pm <sub>8</sub>                     | sub                        | $0 \leq pm_8 \leq 1$                                                                                                                                                                                                                                                                                                                                                                                                                                         |
| (21)   | Ca <sup>d</sup>    | pm <sub>9</sub>                     | sub                        | $0 \leq pm_9 \leq 1$                                                                                                                                                                                                                                                                                                                                                                                                                                         |
| (21)   | Ca <sup>d</sup>    | pm <sub>10</sub>                    | add                        | $0 \leq pm_{10} \leq 1 - SYN$                                                                                                                                                                                                                                                                                                                                                                                                                                |
| (23)   | CaMK               | pm <sub>11</sub>                    | sub                        | $0 \leq pm_{11} \leq 1$                                                                                                                                                                                                                                                                                                                                                                                                                                      |
| (23)   | CaMK               | pm <sub>12</sub>                    | sub                        | $0 \leq pm_{12} \leq 1$                                                                                                                                                                                                                                                                                                                                                                                                                                      |
| (25)   | HDAC               | pm <sub>13</sub> , pm <sub>14</sub> | add                        | $0 \leq pm_{13}, pm_{14} \leq 1 - SYN$<br>$pm_{13} + pm_{14} \leq 1 - SYN$<br>$pm_{rem} = 1 - SYN - pm_{13} - pm_{14}$<br>$sum_{hdac} = pm_{13} \times pm_{14} + pm_{14} \times pm_{rem} + pm_{rem} \times pm_{13}$<br>$pm_{hdac12} = (pm_{13} \times pm_{14} / sum_{hdac}) \times (SYN - SYN3)$<br>$pm_{hdac23} = (pm_{14} \times pm_{rem} / sum_{hdac}) \times (SYN - SYN3)$<br>$pm_{hdac31} = (pm_{rem} \times pm_{13} / sum_{hdac}) \times (SYN - SYN3)$ |

|      |         |                             |     |                                                                                                                                                                                                                                                                                                                                                                                                                                                                                                                                                                                                                                                                                                                                                                                                                                                                                                                                                                                                                                                                                                                                                                                                                                                                                                                                                                                                                                                        |
|------|---------|-----------------------------|-----|--------------------------------------------------------------------------------------------------------------------------------------------------------------------------------------------------------------------------------------------------------------------------------------------------------------------------------------------------------------------------------------------------------------------------------------------------------------------------------------------------------------------------------------------------------------------------------------------------------------------------------------------------------------------------------------------------------------------------------------------------------------------------------------------------------------------------------------------------------------------------------------------------------------------------------------------------------------------------------------------------------------------------------------------------------------------------------------------------------------------------------------------------------------------------------------------------------------------------------------------------------------------------------------------------------------------------------------------------------------------------------------------------------------------------------------------------------|
| (26) | NFATnuc | $pm_{15}, pm_{16}, pm_{17}$ | add | $0 \leq pm_{15}, pm_{16}, pm_{17} \leq 1 - SYN$<br>$pm_{15} + pm_{16} + pm_{17} \leq 1 - SYN$<br>$pm_{rem} = 1 - pm_{15} - pm_{16} - pm_{17}$<br>$SYN_{4\_2} = SYN \times (1 - SYN)$<br>$SYN_{4\_3} = SYN \times SYN \times (1 - SYN)$<br>$sum_2 = pm_{15} \times pm_{16} + pm_{15} \times pm_{17} + pm_{15} \times pm_{rem} + pm_{16} \times pm_{17} + pm_{16}$<br>$\times pm_{rem} + pm_{17} \times pm_{rem}$<br>$sum_3 = pm_{15} \times pm_{16} \times pm_{17} + pm_{15} \times pm_{16} \times pm_{rem} + pm_{15} \times pm_{17} \times$<br>$pm_{rem} + pm_{16} \times pm_{17} \times pm_{rem}$<br>$pm_{nfatnuc12} = ((pm_{15} \times pm_{16}) / sum_2) \times SYN_{4\_2}$<br>$pm_{nfatnuc13} = ((pm_{15} \times pm_{17}) / sum_2) \times SYN_{4\_2}$<br>$pm_{nfatnuc14} = ((pm_{15} \times pm_{rem}) / sum_2) \times SYN_{4\_2}$<br>$pm_{nfatnuc23} = ((pm_{16} \times pm_{17}) / sum_2) \times SYN_{4\_2}$<br>$pm_{nfatnuc24} = ((pm_{16} \times pm_{rem}) / sum_2) \times SYN_{4\_2}$<br>$pm_{nfatnuc34} = ((pm_{17} \times pm_{rem}) / sum_2) \times SYN_{4\_2}$<br>$pm_{nfatnuc123} = ((pm_{15} \times pm_{16} \times pm_{17}) / sum_3) \times SYN_{4\_3}$<br>$pm_{nfatnuc124} = ((pm_{15} \times pm_{16} \times pm_{rem}) / sum_3) \times SYN_{4\_3}$<br>$pm_{nfatnuc134} = ((pm_{15} \times pm_{17} \times pm_{rem}) / sum_3) \times SYN_{4\_3}$<br>$pm_{nfatnuc234} = ((pm_{16} \times pm_{17} \times pm_{rem}) / sum_3) \times SYN_{4\_3}$ |
| (27) | NFATact | $pm_{18}$                   | add | $0 \leq pm_{18} \leq 1 - SYN$                                                                                                                                                                                                                                                                                                                                                                                                                                                                                                                                                                                                                                                                                                                                                                                                                                                                                                                                                                                                                                                                                                                                                                                                                                                                                                                                                                                                                          |
| (27) | NFATact | $pm_{19}$                   | sub | $0 \leq pm_{19} \leq 1$                                                                                                                                                                                                                                                                                                                                                                                                                                                                                                                                                                                                                                                                                                                                                                                                                                                                                                                                                                                                                                                                                                                                                                                                                                                                                                                                                                                                                                |
| (28) | Src     | $pm_{20}$                   | sub | $0 \leq pm_{20} \leq 1$                                                                                                                                                                                                                                                                                                                                                                                                                                                                                                                                                                                                                                                                                                                                                                                                                                                                                                                                                                                                                                                                                                                                                                                                                                                                                                                                                                                                                                |
| (29) | Grb2Sos | $pm_{21}$                   | add | $0 \leq pm_{21} \leq 1 - SYN$                                                                                                                                                                                                                                                                                                                                                                                                                                                                                                                                                                                                                                                                                                                                                                                                                                                                                                                                                                                                                                                                                                                                                                                                                                                                                                                                                                                                                          |

|      |       |                    |     |                                                                                                                                                                                                                                                                                                                                                                                                                                                       |
|------|-------|--------------------|-----|-------------------------------------------------------------------------------------------------------------------------------------------------------------------------------------------------------------------------------------------------------------------------------------------------------------------------------------------------------------------------------------------------------------------------------------------------------|
| (33) | Raf1  | $pm_{22}, pm_{23}$ | add | $0 \leq pm_{22}, pm_{23} \leq 1 - SYN$<br>$pm_{22} + pm_{23} \leq 1 - SYN$<br>$pm_{rem} = 1 - SYN - pm_{22} - pm_{23}$<br>$sum_{raf} = pm_{22} \times pm_{23} + pm_{23} \times pm_{rem} + pm_{rem} \times pm_{22}$<br>$pm_{raf12} = (pm_{22} \times pm_{23} / sum_{raf}) \times (SYN - SYN3)$<br>$pm_{raf23} = (pm_{23} \times pm_{rem} / sum_{raf}) \times (SYN - SYN3)$<br>$pm_{raf31} = (pm_{rem} \times pm_{22} / sum_{raf}) \times (SYN - SYN3)$ |
| (37) | MEK12 | $pm_{24}$          | add | $0 \leq pm_{24} \leq 1 - SYN$                                                                                                                                                                                                                                                                                                                                                                                                                         |
| (38) | MEK4  | $pm_{25}$          | add | $0 \leq pm_{25} \leq 1 - SYN$                                                                                                                                                                                                                                                                                                                                                                                                                         |
| (39) | MEK7  | $pm_{26}$          | add | $0 \leq pm_{26} \leq 1 - SYN$                                                                                                                                                                                                                                                                                                                                                                                                                         |
| (40) | MEK36 | $pm_{27}$          | add | $0 \leq pm_{27} \leq 1 - SYN$                                                                                                                                                                                                                                                                                                                                                                                                                         |
| (41) | ERK12 | $pm_{28}$          | add | $0 \leq pm_{28} \leq 1 - SYN$                                                                                                                                                                                                                                                                                                                                                                                                                         |
| (42) | JNK   | $pm_{29}, pm_{30}$ | add | $0 \leq pm_{29}, pm_{30} \leq 1 - SYN$<br>$pm_{29} + pm_{30} \leq 1 - SYN$<br>$pm_{rem} = 1 - SYN - pm_{29} - pm_{30}$<br>$sum_{jnk} = pm_{29} \times pm_{30} + pm_{30} \times pm_{rem} + pm_{rem} \times pm_{29}$<br>$pm_{jnk12} = (pm_{29} \times pm_{30} / sum_{jnk}) \times (SYN - SYN3)$<br>$pm_{jnk23} = (pm_{30} \times pm_{rem} / sum_{jnk}) \times (SYN - SYN3)$<br>$pm_{jnk31} = (pm_{rem} \times pm_{29} / sum_{jnk}) \times (SYN - SYN3)$ |
| (43) | p38   | $pm_{31}$          | add | $0 \leq pm_{31} \leq 1 - SYN$                                                                                                                                                                                                                                                                                                                                                                                                                         |
| (49) | cGMP  | $pm_{32}$          | add | $0 \leq pm_{32} \leq 1 - SYN$                                                                                                                                                                                                                                                                                                                                                                                                                         |
| (50) | MEF2  | $pm_{33}$          | add | $0 \leq pm_{33} \leq 1 - SYN$                                                                                                                                                                                                                                                                                                                                                                                                                         |
| (51) | GATA4 | $pm_{34}, pm_{35}$ | add | $0 \leq pm_{34}, pm_{35} \leq 1 - SYN$                                                                                                                                                                                                                                                                                                                                                                                                                |

|      |      |                  |     |                                                                                                                                                                                                                                                                                                                                                                                                     |
|------|------|------------------|-----|-----------------------------------------------------------------------------------------------------------------------------------------------------------------------------------------------------------------------------------------------------------------------------------------------------------------------------------------------------------------------------------------------------|
|      |      |                  |     | $pm_{34} + pm_{35} \leq 1 - SYN$ $pm_{rem} = 1 - SYN - pm_{34} - pm_{35}$ $sum_{gata} = pm_{34} \times pm_{35} + pm_{35} \times pm_{rem} + pm_{rem} \times pm_{34}$ $pm_{gata12} = (pm_{34} \times pm_{35} / sum_{gata}) \times (SYN - SYN3)$ $pm_{gata23} = (pm_{35} \times pm_{rem} / sum_{gata}) \times (SYN - SYN3)$ $pm_{gata31} = (pm_{rem} \times pm_{34} / sum_{gata}) \times (SYN - SYN3)$ |
| (53) | cJun | pm <sub>36</sub> | add | $0 \leq pm_{36} \leq 1 - SYN$                                                                                                                                                                                                                                                                                                                                                                       |
| (54) | MSK1 | pm <sub>37</sub> | add | $0 \leq pm_{37} \leq 1 - SYN$                                                                                                                                                                                                                                                                                                                                                                       |

<sup>a</sup>Constitution of differential equation is classified to two classes: type add and type sub. Type add is used when different links converging to one node can take independent roles in regulating the node. In contrast, type sub is used when one link takes a subsidiary role in regulating the node in the same situation.

<sup>b</sup>Because these equations represent process of transformation, equation type should be 'sub'

<sup>c</sup>Both Ca and DAG is required to activate PKC and CaN takes subsidiary role in such activation.

<sup>d</sup>Since PI3K only inhibits PKA-induced calcium activation, the equation takes the form of the stepwise activation rather than direct convergence of three different links



**Supplementray Table S4.** Verification data in the cardiac signaling network.

| Reference (PMID) | Experimental setting         | Input    | Output                   | Effect | Time  |
|------------------|------------------------------|----------|--------------------------|--------|-------|
| 11585926         | cardiomyocytes + Ad GATA4 TF | PE(10uM) | p-GATA4/GATA4            | 3.5    | 0hr   |
| 11585926         | cardiomyocytes + Ad GATA4 TF | PE(10uM) | p-GATA4/GATA4            | 5      | 1hr   |
| 11585926         | cardiomyocytes + Ad GATA4 TF | PE(10uM) | p-GATA4/GATA4            | 8      | 3hr   |
| 11585926         | cardiomyocytes + Ad GATA4 TF | PE(10uM) | p-GATA4/GATA4            | 10     | 24hr  |
| 11585926         | NRVM                         | Saline   | p-GATA4/GATA4            | 1      | 3hr   |
| 11585926         | NRVM                         | PE       | p-GATA4/GATA4            | 3      | 3hr   |
| 10737771         | NRCM                         | none     | MEF2                     | 1      | NA    |
| 10737771         | NRCM                         | PE       | MEF2                     | 4.5    | NA    |
| 15522277         | NRVM                         | PE       | CREB                     | 0.2    | 0min  |
| 15522277         | NRVM                         | PE       | CREB                     | 0.3    | 1min  |
| 15522277         | NRVM                         | PE       | CREB                     | 0.5    | 2min  |
| 15522277         | NRVM                         | PE       | CREB                     | 1.5    | 5min  |
| 15522277         | NRVM                         | PE       | CREB                     | 1.4    | 10min |
| 15522277         | NRVM                         | PE       | CREB                     | 1.5    | 15min |
| 15522277         | NRVM                         | PE       | CREB                     | 0.6    | 30min |
| 15522277         | NRVM                         | none     | MSK1                     | 50     | 10min |
| 15522277         | NRVM                         | PE       | MSK1                     | 200    | 10min |
| 11356841         | NRVM+AdGATA4                 | none     | GATA4                    | 1      | 3hr   |
| 11356841         | NRVM+AdGATA4                 | PE       | GATA4                    | 2.1    | 3hr   |
| 24152730         | NRCM                         | none     | HDAC4 mRNA expression    | 5      | 24hr  |
| 24152730         | NRCM                         | Ang II   | HDAC4 mRNA expression    | 1.5    | 24hr  |
| 24152730         | NRCM                         | none     | HDAC5 mRNA expression    | 7      | 24hr  |
| 24152730         | NRCM                         | Ang II   | HDAC5 mRNA expression    | 2      | 24hr  |
| 24152730         | NRCM                         | none     | HDAC4 protein expression | 12     | 24hr  |
| 24152730         | NRCM                         | Ang II   | HDAC4 protein expression | 4      | 24hr  |
| 24152730         | NRCM                         | none     | HDAC5 protein expression | 13     | 24hr  |

|          |                                      |                                  |                                |      |        |
|----------|--------------------------------------|----------------------------------|--------------------------------|------|--------|
| 24152730 | NRCM                                 | Ang II                           | HDAC5 protein expression       | 3    | 24hr   |
| 24152730 | NRCM                                 | none                             | GATA4 protein expression       | 100  | 24hr   |
| 24152730 | NRCM                                 | Ang II                           | GATA4 protein expression       | 330* | 24hr   |
| 24152730 | NRCM                                 | none                             | GATA4 mRNA expression          | 1    | 24hr   |
| 24152730 | NRCM                                 | Ang II                           | GATA4 mRNA expression          | 3.3* | 24hr   |
| 24152730 | NRCM                                 | none                             | GATA4 transcriptional activity | 1    | 24hr   |
| 24152730 | NRCM                                 | Ang II                           | GATA4 transcriptional activity | 2.8* | 24hr   |
| 12177418 | Ventricular cardiomyocyte            | none                             | nuclear localization of NFAT   | 23   | 48hr   |
| 12177418 | Ventricular cardiomyocyte            | PE                               | nuclear localization of NFAT   | 50   | 48hr   |
| 12494267 | Neonatal rat cardiomyocytes          | 100nM Ang2                       | ERK12                          | 100  | 5min   |
| 12494267 | Neonatal rat cardiomyocytes          | 100nM Ang2                       | ERK12                          | 45   | 30min  |
| 12494267 | Neonatal rat cardiomyocytes          | 100nM Ang2                       | ERK12                          | 27.5 | 60min  |
| 12494267 | Neonatal rat cardiomyocytes          | 100nM Ang2                       | ERK12                          | 7.5  | 120min |
| 9751683  | ARVM(adult rat ventricular myocytes) | control                          | Apoptosis                      | 10   | 24h    |
| 9751683  | ARVM                                 | NE(10microM/L)                   | Apoptosis                      | 36   | 24h    |
| 9751683  | ARVM                                 | control                          | Apoptosis                      | 7    | 24h    |
| 9751683  | ARVM                                 | ISO(10microM/L)                  | Apoptosis                      | 14.6 | 24h    |
| 8921810  | Cardiomyocytes                       | NE (1*10 <sup>-5</sup> mol/L)    | MAPK                           | 1    | 0min   |
| 8921810  | Cardiomyocytes                       | NE (1*10 <sup>-5</sup> mol/L)    | MAPK                           | 5    | 2min   |
| 8921810  | Cardiomyocytes                       | NE (1*10 <sup>-5</sup> mol/L)    | MAPK                           | 11.4 | 5min   |
| 8921810  | Cardiomyocytes                       | NE (1*10 <sup>-5</sup> mol/L)    | MAPK                           | 8    | 15min  |
| 8921810  | Cardiomyocytes                       | NE (1*10 <sup>-5</sup> mol/L)    | MAPK                           | 5.75 | 30min  |
| 8921810  | Cardiomyocytes                       | NE (1*10 <sup>-5</sup> mol/L)    | MAPK                           | 4.8  | 60min  |
| 9363896  | HEK293                               | none                             | pMAPK                          | 1    | 5min   |
| 9363896  | HEK293                               | Isoprenaline(10 <sup>-10</sup> ) | pMAPK                          | 1,2  | 5min   |
| 9363896  | HEK293                               | Isoprenaline(10 <sup>-9</sup> )  | pMAPK                          | 2    | 5min   |

|          |                                         |                                       |                     |             |       |
|----------|-----------------------------------------|---------------------------------------|---------------------|-------------|-------|
| 9363896  | HEK293                                  | Isoprenaline( $10^{-8}$ )             | pMAPK               | 4           | 5min  |
| 9363896  | HEK293                                  | Isoprenaline( $10^{-7}$ )             | pMAPK               | 5.5         | 5min  |
| 9363896  | HEK293                                  | Isoprenaline( $10^{-6}$ )             | pMAPK               | 6           | 5min  |
| 9363896  | HEK293                                  | Isoprenaline( $10^{-5}$ )             | pMAPK               | 5.8         | 5min  |
| 15964981 | Adult cardiomyocyte(Rat)                | control                               | CaMKII activation   | 100         | 15min |
| 15964981 | Adult cardiomyocyte(Rat)                | phe(0.1uM)                            | CaMKII activation   | 130         | 15min |
| 15964981 | Adult cardiomyocyte(Rat)                | phe(1uM)                              | CaMKII activation   | 170         | 15min |
| 15964981 | Adult cardiomyocyte(Rat)                | phe(10uM)                             | CaMKII activation   | 190         | 15min |
| 15964981 | Adult cardiomyocyte(Rat)                | phe(100uM)                            | CaMKII activation   | 185         | 15min |
| 15572667 | control mouse                           | none                                  | p38 kinase activity | 1           | 0min  |
| 15572667 | control                                 | phenylephrine                         | p38 kinase activity | 1.6         | 30min |
| 15572667 | p38aCKO(10wk)                           | none                                  | p38 kinase activity | 0.25        | 0min  |
| 15572667 | p38aCKO(10wk)                           | phenylephrine                         | p38 kinase activity | 0.4         | 30min |
| 15572667 | control                                 | saline                                | TUNEL(+) myocytes   | 23          | NA    |
| 15572667 | control                                 | isoproterenol(7.5mg/kg/day for 2days) | TUNEL(+) myocytes   | 26          | NA    |
| 15572667 | p38aCKO(10wk)                           | saline                                | TUNEL(+) myocytes   | 25          | NA    |
| 15572667 | p38aCKO(10wk)                           | isoproterenol(7.5mg/kg/day for 2days) | TUNEL(+) myocytes   | 50          | NA    |
| 12177418 | Ventricular cardiomyocyte               | none                                  | cell size           | 800         | 48hr  |
| 12177418 | Ventricular cardiomyocyte               | PE                                    | cell size           | 1200        | 48hr  |
| 11435346 | NRVM                                    | none                                  | ERK1/2              | 0.1         | NA    |
| 11435346 | NRVM+thapsigargin/nifedipine/EGTA pretx | none                                  | ERK1/2              | 0.1/0.1/0.1 | NA    |
| 11435346 | NRVM                                    | Iso                                   | ERK1/2              | 1           | NA    |
| 11435346 | NRVM+thapsigargin/nifedipine/EGTA pretx | Iso                                   | ERK1/2              | 0.5/0.2/0.2 | NA    |
| 11435346 | NRVM                                    | none                                  | ERK1/2              | 0.1         | 8min  |
| 11435346 | NRVM                                    | AngII                                 | ERK1/2              | 0.4         | 8min  |
| 11435346 | NRVM                                    | PHE                                   | ERK1/2              | 2           | 8min  |
| 11435346 | NRVM                                    | Iso(10uM)                             | calcineurin         | 100         | 0min  |

|          |                  |             |                           |     |       |
|----------|------------------|-------------|---------------------------|-----|-------|
| 11435346 | NRVM             | Iso(10uM)   | calcineurin               | 120 | 1min  |
| 11435346 | NRVM             | Iso(10uM)   | calcineurin               | 180 | 2min  |
| 11435346 | NRVM             | Iso(10uM)   | calcineurin               | 260 | 5min  |
| 11435346 | NRVM             | Iso(10uM)   | calcineurin               | 150 | 15min |
| 11435346 | NRVM             | Iso(10uM)   | calcineurin               | 130 | 30min |
| 11435346 | NRVM             | Iso(0uM)    | calcineurin               | 100 | 5min  |
| 11435346 | NRVM             | Iso(0.01uM) | calcineurin               | 180 | 5min  |
| 11435346 | NRVM             | Iso(0.1uM)  | calcineurin               | 190 | 5min  |
| 11435346 | NRVM             | Iso(1uM)    | calcineurin               | 200 | 5min  |
| 11435346 | NRVM             | Iso(10uM)   | calcineurin               | 310 | 5min  |
| 11435346 | NRVM             | Iso(100uM)  | calcineurin               | 300 | 5min  |
| 11435346 | NRVM             | Iso         | Raf-1                     | 0.1 | 0min  |
| 11435346 | NRVM             | Iso         | Raf-1                     | 0.5 | 1min  |
| 11435346 | NRVM             | Iso         | Raf-1                     | 1   | 2min  |
| 11435346 | NRVM             | Iso         | Raf-1                     | 1   | 5min  |
| 11435346 | NRVM             | Iso         | Raf-1                     | 1   | 10min |
| 11435346 | NRVM             | Iso         | Raf-1                     | 0.5 | 15min |
| 24248367 | NRVM             | control     | PDE3A1                    | 0.1 | NA    |
| 24248367 | NRVM             | Iso         | PDE3A1                    | 1   | NA    |
| 23933582 | ARVM             | control     | calcium(Fura2 ratio)      | 20  | NA    |
| 23933582 | ARVM             | Iso         | calcium(Fura2 ratio)      | 100 | NA    |
| 11799083 | NRVM             | PE          | AP-1 DNA binding activity | 1   | 0hr   |
| 11799083 | NRVM             | PE          | AP-1 DNA binding activity | 4.8 | 3hr   |
| 11799083 | NRVM             | PE          | AP-1 DNA binding activity | 4   | 6hr   |
| 11799083 | NRVM             | PE          | AP-1 DNA binding activity | 3.8 | 12hr  |
| 11799083 | NRVM             | PE          | AP-1 DNA binding activity | 2.1 | 24hr  |
| 9584192  | myocyte+GST-ATF2 | none        | p38 activity              | 0   | 0min  |
| 9584192  | myocyte+GST-ATF2 | PE          | p38 activity              | 7   | 15min |
| 9584192  | myocyte+GST-ATF2 | PE          | p38 activity              | 10  | 30min |
| 9584192  | myocyte+GST-ATF2 | PE          | p38 activity              | 3   | 60min |

|          |                          |      |                            |     |        |
|----------|--------------------------|------|----------------------------|-----|--------|
| 9584192  | myocyte+GST-ATF2         | PE   | p38 activity               | 2   | 120min |
| 9584192  | myocyte+GST-c-Jun        | none | JNK activity               | 0   | 0min   |
| 9584192  | myocyte+GST-c-Jun        | PE   | JNK activity               | 10  | 15min  |
| 9584192  | myocyte+GST-c-Jun        | PE   | JNK activity               | 13  | 30min  |
| 9584192  | myocyte+GST-c-Jun        | PE   | JNK activity               | 5   | 60min  |
| 9584192  | myocyte+GST-c-Jun        | PE   | JNK activity               | 3   | 120min |
| 9584192  | myocyte+MBP              | none | ERK activity               | 0   | 0min   |
| 9584192  | myocyte+MBP              | PE   | ERK activity               | 4   | 15min  |
| 9584192  | myocyte+MBP              | PE   | ERK activity               | 2   | 30min  |
| 9584192  | myocyte+MBP              | PE   | ERK activity               | 1   | 60min  |
| 9584192  | myocyte+MBP              | PE   | ERK activity               | 1   | 120min |
| 15367659 | NRVM+Ad GFP-HDAC5        | none | HDAC5 nuclear localization | 750 | 2hr    |
| 15367659 | NRVM+Ad GFP-HDAC5        | PE   | HDAC5 nuclear localization | 150 | 2hr    |
| 20362664 | NRVM serum-starved (24h) | ISO  | RGS expression/18s rRNA    | 4.5 | 0.5h   |
| 20362664 | NRVM serum-starved (24h) | ISO  | RGS expression/18s rRNA    | 8   | 1h     |
| 20362664 | NRVM serum-starved (24h) | ISO  | RGS expression/18s rRNA    | 4   | 2h     |
| 20362664 | NRVM serum-starved (24h) | ISO  | RGS expression/18s rRNA    | 2.5 | 6h     |
| 20362664 | NRVM serum-starved (24h) | ISO  | RGS expression/18s rRNA    | 1   | 24h    |

**Supplementray Table S5.** Verification results in the cardiac signaling network.

|                     | Lin      | Hill     | Sat      | Acc      | Combination* |
|---------------------|----------|----------|----------|----------|--------------|
| Increase of RGS4    | 0.999999 | 0.618143 | 0.999986 | 0.999995 | 0.849005     |
| Increase of Ca      | 0.975967 | 0.60222  | 0.944983 | 0.994678 | 0.841005     |
| Increase of PDE34   | 0.992181 | 0.622474 | 0.984437 | 0.997869 | 0.811249     |
| Increase of Raf1    | 0.798534 | 0.511632 | 0.85876  | 0.700121 | 0.691984     |
| Increase of CaN     | 0.975967 | 0.602289 | 0.944971 | 0.994657 | 0.842722     |
| Increase of JNK     | 0.903222 | 0.521664 | 0.881672 | 0.921375 | 0.801478     |
| Increase of p38     | 0.891231 | 0.504119 | 0.912041 | 0.862816 | 0.816612     |
| Increase of CaMK    | 0.978696 | 0.606074 | 0.95267  | 0.995022 | 0.835570     |
| Increase of ERK12   | 0.994433 | 0.616307 | 0.997128 | 0.990608 | 0.833709     |
| Increase of NFATnuc | 0.746256 | 0.525368 | 0.595141 | 0.9129   | 0.676622     |
| Decrease of HDAC    | 0.872288 | 0.945868 | 0.915132 | 0.793033 | 0.864994     |
| Increase of MSK1    | 0.988983 | 0.588751 | 0.996149 | 0.984066 | 0.831351     |
| Increase of CREB    | 0.926242 | 0.48057  | 0.921248 | 0.929137 | 0.810174     |
| Increase of MEF2    | 0.921411 | 0.559428 | 0.956791 | 0.840387 | 0.829389     |
| Increase of GATA4   | 0.99415  | 0.606909 | 0.997398 | 0.993794 | 0.868812     |
| Increase of cJun    | 0.911455 | 0.520087 | 0.914718 | 0.911178 | 0.827229     |

Effect of catecholamine on the distribution of the 16 network components evaluated using each function type separately or using different types of response functions in a combined manner.

\* Results of the mathematical simulation analysis performed using the combination of the four different response functions

**Supplementray Table S6.** Results of the one-distribution perturbation analyses in the cardiac signaling network.

1) Result of one-distribution perturbation analysis for apoptosis or hypertrophy when each response function was separately applied

| Threshold: top 5%  | Apoptosis   |       | Lin    |         | Hill   |         | Sat    |         | Acc    |         |
|--------------------|-------------|-------|--------|---------|--------|---------|--------|---------|--------|---------|
|                    |             |       | Effect | p-value | Effect | p-value | Effect | p-value | Effect | p-value |
|                    |             | pm7   | 2.069  | <0.001  | 1.646  | <0.001  | 2.483  | <0.001  | 1.871  | <0.001  |
|                    | pm10        | 2.140 | <0.001 | 1.905   | <0.001 | 1.933   | <0.001 | 2.221   | <0.001 |         |
|                    | pm12        | 1.154 | 0.024  | 1.236   | <0.001 | 1.169   | 0.021  | 1.254   | <0.001 |         |
|                    | pm21        | 1.163 | 0.023  | 1.273   | <0.001 | 1.484   | <0.001 | 1.167   | 0.021  |         |
|                    | pm28        | 1.335 | <0.001 | 1.162   | 0.027  | 1.162   | 0.021  | 1.450   | <0.001 |         |
| Threshold: top 5%  | Hypertrophy |       | Lin    |         | Hill   |         | Sat    |         | Acc    |         |
|                    |             |       | Effect | p-value | Effect | p-value | Effect | p-value | Effect | p-value |
|                    |             | pm7   | 3.115  | <0.001  | 2.285  | <0.001  | 3.306  | <0.001  | 2.322  | <0.001  |
|                    |             | pm10  | 1.557  | <0.001  | 1.542  | <0.001  | 1.367  | <0.001  | 1.692  | <0.001  |
|                    |             | pm15  | 1.151  | 0.021   | 1.267  | <0.001  | 1.162  | 0.024   | 1.169  | 0.020   |
|                    |             | pm16  | 1.148  | 0.022   | 1.193  | 0.008   | 1.218  | <0.001  | 1.178  | 0.010   |
|                    |             | pm17  | 1.148  | 0.022   | 1.170  | 0.009   | 1.196  | 0.007   | 1.154  | 0.020   |
|                    |             | pm21  | 1.626  | <0.001  | 1.143  | 0.033   | 1.873  | <0.001  | 1.207  | <0.001  |
| Threshold: top 20% | Apoptosis   |       | Lin    |         | Hill   |         | Sat    |         | Acc    |         |
|                    |             |       | Effect | p-value | Effect | p-value | Effect | p-value | Effect | p-value |
|                    |             | pm7   | 1.907  | <0.001  | 1.494  | <0.001  | 2.074  | <0.001  | 1.583  | <0.001  |
|                    |             | pm10  | 2.002  | <0.001  | 1.639  | <0.001  | 1.901  | <0.001  | 2.127  | <0.001  |
|                    |             | pm12  | 1.122  | 0.033   | 1.161  | 0.014   | 1.125  | 0.038   | 1.227  | <0.001  |

|  |             |      |        |         |        |         |        |         |        |         |        |
|--|-------------|------|--------|---------|--------|---------|--------|---------|--------|---------|--------|
|  |             | pm21 | 1.117  | 0.038   | 1.251  | <0.001  | 1.338  | <0.001  | 1.147  | 0.035   |        |
|  |             | pm28 | 1.249  | <0.001  | 1.117  | 0.042   | 1.130  | 0.034   | 1.372  | <0.001  |        |
|  | Hypertrophy |      | Lin    |         | Hill   |         | Sat    |         | Acc    |         |        |
|  |             |      | Effect | p-value | Effect | p-value | Effect | p-value | Effect | p-value |        |
|  |             |      | pm7    | 2.654   | <0.001 | 1.920   | <0.001 | 2.509   | <0.001 | 2.203   | <0.001 |
|  |             |      | pm10   | 1.411   | <0.001 | 1.505   | <0.001 | 1.252   | <0.001 | 1.500   | <0.001 |
|  |             |      | pm15   | 1.134   | 0.040  | 1.223   | <0.001 | 1.135   | 0.035  | 1.139   | 0.031  |
|  |             |      | pm16   | 1.148   | 0.022  | 1.137   | 0.028  | 1.166   | 0.015  | 1.151   | 0.020  |
|  |             |      | pm17   | 1.127   | 0.041  | 1.156   | 0.030  | 1.173   | 0.011  | 1.130   | 0.037  |
|  |             |      | pm21   | 1.475   | <0.001 | 1.122   | 0.042  | 1.748   | <0.001 | 1.176   | 0.013  |

Results of one-distribution perturbation analysis for apoptosis and hypertrophy when the threshold for determining the marginal distributions was set to top 5% or 20%. The effect is represented as the ratio between the degree of appearance of phenotypes in the one-distribution perturbation analysis and that in the control distributions. Parameters of which the marginal distributions significantly ( $p < 0.05$ ) increased apoptosis or hypertrophy in all response function types are shown. The mathematical analysis was all repeated for 10 times using different random seeds of 1 million parameter sets for each case. P-values were determined by comparison with the control distributions using Student's *t* test. See Supplementary Data Sets for full data.



2) Result of reverse one-distribution perturbation analysis for apoptosis or hypertrophy when each response function was separately applied

| Threshold: top 5%  | Apoptosis   |       | Lin    |         | Hill   |         | Sat    |         | Acc    |         |
|--------------------|-------------|-------|--------|---------|--------|---------|--------|---------|--------|---------|
|                    |             |       | Effect | p-value | Effect | p-value | Effect | p-value | Effect | p-value |
|                    |             | pm7   | 0.012  | <0.001  | 0.214  | <0.001  | 0.024  | <0.001  | 0.130  | <0.001  |
|                    | pm10        | 0.158 | <0.001 | 0.376   | <0.001 | 0.180   | <0.001 | 0.050   | <0.001 |         |
|                    | pm12        | 0.816 | 0.009  | 0.743   | <0.001 | 0.761   | <0.001 | 0.694   | <0.001 |         |
|                    | pm23        | 0.816 | 0.009  | 0.614   | <0.001 | 0.714   | <0.001 | 0.784   | <0.001 |         |
|                    | pm28        | 0.671 | <0.001 | 0.728   | <0.001 | 0.789   | <0.001 | 0.529   | <0.001 |         |
|                    | pm30        | 0.714 | <0.001 | 0.470   | <0.001 | 0.826   | 0.017  | 0.633   | <0.001 |         |
| Threshold: top 5%  | Hypertrophy |       | Lin    |         | Hill   |         | Sat    |         | Acc    |         |
|                    |             |       | Effect | p-value | Effect | p-value | Effect | p-value | Effect | p-value |
|                    |             | pm7   | 0.005  | <0.001  | 0.119  | <0.001  | 0.001  | <0.001  | 0.047  | <0.001  |
|                    |             | pm10  | 0.509  | <0.001  | 0.443  | <0.001  | 0.647  | <0.001  | 0.322  | <0.001  |
|                    |             | pm16  | 0.498  | <0.001  | 0.417  | <0.001  | 0.481  | <0.001  | 0.585  | <0.001  |
|                    |             | pm17  | 0.464  | <0.001  | 0.385  | <0.001  | 0.419  | <0.001  | 0.699  | <0.001  |
|                    |             | pm35  | 0.873  | 0.030   | 0.917  | 0.043   | 0.897  | 0.045   | 0.638  | <0.001  |
| Threshold: top 20% | Apoptosis   |       | Lin    |         | Hill   |         | Sat    |         | Acc    |         |
|                    |             |       | Effect | p-value | Effect | p-value | Effect | p-value | Effect | p-value |
|                    |             | pm7   | 0.302  | <0.001  | 0.536  | <0.001  | 0.255  | <0.001  | 0.387  | <0.001  |
|                    |             | pm10  | 0.274  | <0.001  | 0.431  | <0.001  | 0.394  | <0.001  | 0.290  | <0.001  |
|                    |             | pm12  | 0.888  | 0.032   | 0.829  | 0.011   | 0.897  | 0.038   | 0.754  | <0.001  |
| pm23               | 0.890       | 0.039 | 0.729  | <0.001  | 0.863  | 0.011   | 0.897  | 0.042   |        |         |

|  |             |      |        |         |        |         |        |         |        |         |
|--|-------------|------|--------|---------|--------|---------|--------|---------|--------|---------|
|  |             | pm28 | 0.788  | <0.001  | 0.895  | 0.040   | 0.847  | 0.011   | 0.700  | <0.001  |
|  |             | pm30 | 0.790  | <0.001  | 0.680  | <0.001  | 0.887  | 0.041   | 0.715  | <0.001  |
|  | Hypertrophy |      | Lin    |         | Hill   |         | Sat    |         | Acc    |         |
|  |             |      | Effect | p-value | Effect | p-value | Effect | p-value | Effect | p-value |
|  |             | pm7  | 0.100  | <0.001  | 0.299  | <0.001  | 0.191  | <0.001  | 0.195  | <0.001  |
|  |             | pm10 | 0.669  | <0.001  | 0.604  | <0.001  | 0.781  | <0.001  | 0.551  | <0.001  |
|  |             | pm16 | 0.588  | <0.001  | 0.446  | <0.001  | 0.620  | <0.001  | 0.670  | <0.001  |
|  |             | pm17 | 0.648  | <0.001  | 0.499  | <0.001  | 0.616  | <0.001  | 0.754  | <0.001  |
|  |             | pm35 | 0.901  | 0.040   | 0.884  | 0.041   | 0.898  | 0.031   | 0.741  | <0.001  |

Results of reverse one-distribution perturbation analysis for apoptosis and hypertrophy when the threshold for determining the marginal distributions was set to top 5% or 20%. The effect is represented as the ratio between the degree of appearance of phenotypes in the one-distribution perturbation analysis and that in the control distributions. Parameters of which the marginal distributions significantly ( $p < 0.05$ ) decreased apoptosis or hypertrophy in all response function types are shown. The mathematical analysis was all repeated for 10 times using different random seeds of 1 million parameter sets for each case. P-values were determined by comparison with the control distributions using Student's *t* test. See Supplementary Data Sets for full data.

3) Result of one-distribution perturbation analysis when four different response function types were applied in a combined manner

| One-distribution perturbation analysis         | Apoptosis | Top 5%  |         | Top 10% |         | Top 20% |         |
|------------------------------------------------|-----------|---------|---------|---------|---------|---------|---------|
|                                                |           | Effect  | p-value | Effect  | p-value | Effect  | p-value |
|                                                |           | pm7     | 1.888   | <0.001  | 1.700   | <0.001  | 1.385   |
| pm10                                           | 1.876     | <0.001  | 1.667   | <0.001  | 1.597   | <0.001  |         |
| pm12                                           | 1.349     | <0.001  | 1.182   | 0.012   | 1.176   | 0.012   |         |
| pm21                                           | 1.397     | <0.001  | 1.214   | <0.001  | 1.174   | 0.013   |         |
| pm28                                           | 1.332     | <0.001  | 1.188   | 0.012   | 1.166   | 0.028   |         |
| Hypertrophy                                    | Top 5%    |         | Top 10% |         | Top 20% |         |         |
|                                                | Effect    | p-value | Effect  | p-value | Effect  | p-value |         |
|                                                | pm7       | 2.412   | <0.001  | 2.350   | <0.001  | 1.955   | <0.001  |
| pm10                                           | 1.397     | <0.001  | 1.334   | <0.001  | 1.247   | <0.001  |         |
| pm15                                           | 1.291     | <0.001  | 1.175   | 0.010   | 1.165   | 0.012   |         |
| pm16                                           | 1.259     | <0.001  | 1.220   | <0.001  | 1.146   | 0.022   |         |
| pm17                                           | 1.191     | 0.006   | 1.153   | 0.018   | 1.142   | 0.025   |         |
| pm21                                           | 1.438     | <0.001  | 1.396   | <0.001  | 1.292   | <0.001  |         |
| Reverse one-distribution perturbation analysis | Apoptosis | Top 5%  |         | Top 10% |         | Top 20% |         |
|                                                |           | Effect  | p-value | Effect  | p-value | Effect  | p-value |
|                                                |           | pm7     | 0.192   | <0.001  | 0.413   | <0.001  | 0.497   |
| pm10                                           | 0.338     | <0.001  | 0.391   | <0.001  | 0.518   | <0.001  |         |
| pm12                                           | 0.775     | <0.001  | 0.853   | 0.028   | 0.891   | 0.040   |         |
| pm23                                           | 0.797     | <0.001  | 0.823   | 0.016   | 0.880   | 0.018   |         |
| pm28                                           | 0.778     | <0.001  | 0.812   | 0.010   | 0.849   | 0.023   |         |
| pm30                                           | 0.782     | <0.001  | 0.822   | 0.011   | 0.848   | 0.022   |         |

|  | Hypertrophy |      | Top 5% |         | Top 10% |         | Top 20% |         |
|--|-------------|------|--------|---------|---------|---------|---------|---------|
|  |             |      | Effect | p-value | Effect  | p-value | Effect  | p-value |
|  |             | pm7  | 0.177  | <0.001  | 0.269   | <0.001  | 0.503   | <0.001  |
|  |             | pm10 | 0.685  | <0.001  | 0.759   | <0.001  | 0.795   | <0.001  |
|  |             | pm16 | 0.634  | <0.001  | 0.693   | <0.001  | 0.747   | <0.001  |
|  |             | pm17 | 0.699  | <0.001  | 0.733   | <0.001  | 0.778   | <0.001  |
|  |             | pm35 | 0.718  | <0.001  | 0.827   | 0.007   | 0.896   | 0.034   |

Results of one-distribution perturbation analysis for apoptosis and hypertrophy when four different response function types were applied in a combined manner. The effect is represented as the ratio between the degree of appearance of phenotypes in one-distribution perturbation analysis and that in the control distributions. Threshold for determining the marginal distributions was set to top 5%, 10%, or 20%. Parameters of which the marginal distributions significantly ( $p < 0.05$ ) increased apoptosis or hypertrophy are shown. The mathematical analysis was all repeated for 10 times using different random seeds of 1 million parameter sets for each case. P-values were determined by comparison with the control distributions using Student's *t* test. See Supplementary Data Sets for full data.

**Supplementray Table S7.** Results of two-distribution perturbation analysis when four different response function types were applied in a combined manner

|           | Pair of perturbed parameter distributions | 1 million parameter sets |         | 10 million parameter sets |         | 100 million parameter sets |         |
|-----------|-------------------------------------------|--------------------------|---------|---------------------------|---------|----------------------------|---------|
|           |                                           | Synergistic effect       | p-value | Synergistic effect        | p-value | Synergistic effect         | p-value |
| Apoptosis | pm1-pm10                                  | 0.11                     | 0.006   | 0.125                     | 0.008   | 0.108                      | 0.007   |
|           | pm2-pm10                                  | 0.113                    | 0.009   | 0.096                     | 0.017   | 0.117                      | 0.010   |
|           | pm3-pm10                                  | 0.101                    | 0.006   | 0.103                     | 0.008   | 0.111                      | 0.009   |
|           | pm6-pm10                                  | 0.196                    | 0.004   | 0.211                     | <0.001  | 0.185                      | 0.002   |
|           | pm7-pm10                                  | 0.482                    | <0.001  | 0.463                     | <0.001  | 0.454                      | <0.001  |
|           | pm7-pm30                                  | 0.09                     | 0.019   | 0.078                     | 0.015   | 0.079                      | 0.011   |
|           | pm8-pm10                                  | 0.097                    | 0.015   | 0.108                     | 0.010   | 0.12                       | 0.009   |
|           | pm9-pm10                                  | 0.113                    | 0.009   | 0.098                     | 0.018   | 0.115                      | 0.007   |
|           | pm10-pm11                                 | 0.149                    | 0.005   | 0.163                     | 0.002   | 0.169                      | 0.004   |
|           | pm10-pm13                                 | 0.119                    | 0.007   | 0.107                     | 0.005   | 0.128                      | 0.009   |
|           | pm10-pm14                                 | 0.091                    | 0.013   | 0.093                     | 0.011   | 0.108                      | 0.009   |
|           | pm10-pm15                                 | 0.065                    | 0.026   | 0.071                     | 0.013   | 0.07                       | 0.032   |
|           | pm10-pm17                                 | 0.091                    | 0.014   | 0.084                     | 0.010   | 0.082                      | 0.018   |
|           | pm10-pm19                                 | 0.09                     | 0.019   | 0.086                     | 0.014   | 0.104                      | 0.010   |
|           | pm10-pm20                                 | 0.092                    | 0.012   | 0.091                     | 0.014   | 0.105                      | 0.006   |
|           | pm10-pm26                                 | 0.066                    | 0.031   | 0.068                     | 0.031   | 0.073                      | 0.011   |
|           | pm10-pm30                                 | 0.118                    | 0.008   | 0.112                     | 0.006   | 0.138                      | 0.008   |
|           | pm10-pm32                                 | 0.08                     | 0.014   | 0.09                      | 0.015   | 0.081                      | 0.017   |
|           | pm10-pm33                                 | 0.057                    | 0.029   | 0.066                     | 0.026   | 0.058                      | 0.029   |

|             |                                           |                          |         |                           |         |                            |         |
|-------------|-------------------------------------------|--------------------------|---------|---------------------------|---------|----------------------------|---------|
|             | pm10-pm34                                 | 0.171                    | 0.003   | 0.165                     | 0.004   | 0.185                      | 0.004   |
|             | pm10-pm35                                 | 0.109                    | 0.009   | 0.109                     | 0.007   | 0.094                      | 0.015   |
|             | pm10-pm36                                 | 0.054                    | 0.039   | 0.054                     | 0.037   | 0.068                      | 0.039   |
|             | pm10-pm37                                 | 0.142                    | 0.008   | 0.128                     | 0.008   | 0.134                      | 0.008   |
|             | pm22-pm23                                 | 0.164                    | 0.003   | 0.153                     | 0.004   | 0.163                      | 0.004   |
| Hypertrophy | Pair of perturbed parameter distributions | 1 million parameter sets |         | 10 million parameter sets |         | 100 million parameter sets |         |
|             |                                           | Synergistic effect       | p-value | Synergistic effect        | p-value | Synergistic effect         | p-value |
|             | pm7-pm10                                  | 0.379                    | <0.001  | 0.361                     | <0.001  | 0.333                      | <0.001  |
|             | pm7-pm13                                  | 0.195                    | 0.005   | 0.167                     | 0.007   | 0.175                      | 0.003   |
|             | pm7-pm14                                  | 0.147                    | 0.007   | 0.141                     | 0.007   | 0.127                      | 0.007   |
|             | pm7-pm21                                  | 0.405                    | <0.001  | 0.434                     | <0.001  | 0.399                      | <0.001  |
|             | pm10-pm14                                 | 0.144                    | 0.009   | 0.166                     | 0.003   | 0.175                      | 0.017   |
|             | pm16-pm17                                 | 0.235                    | <0.001  | 0.256                     | <0.001  | 0.222                      | 0.001   |

Results of two-distribution perturbation analysis for apoptosis and hypertrophy when four different response function types were applied in a combined manner. The synergistic effect was calculated as the difference between the effect of simultaneous perturbation of marginal distributions of two parameters on the phenotype and the sum of that obtained from perturbing either individual marginal distribution. Higher values indicate stronger synergistic effect. Parameter pairs exhibiting synergistic effect for apoptosis or hypertrophy with significance ( $p < 0.05$ ) are shown. The mathematical analysis was all repeated for 10 times using different random seeds of 1, 10, or 100 million parameter sets for each case. P-values were determined using Student's *t* test. See Supplementary Data Sets for full data.

**Table S8.** Differential equations of the mathematical model of 16 network motifs.

| Network motif                      | Differential equations                                                                                                                                                                              |
|------------------------------------|-----------------------------------------------------------------------------------------------------------------------------------------------------------------------------------------------------|
| Type 1 negative feedback (motif 1) | $\frac{dX}{dt} = p_2 \times f_{inh}(Z) + (1 - p_1 - p_2) \times f_{act}(Input) + p_1 \times f_{inh}(Z) \times f_{act}(Input) - X$ $\frac{dY}{dt} = f_{act}(X) - Y$ $\frac{dZ}{dt} = f_{act}(Y) - Z$ |
| Type 2 negative feedback (motif 2) | $\frac{dX}{dt} = p_2 \times f_{act}(Z) + (1 - p_1 - p_2) \times f_{act}(Input) + p_1 \times f_{act}(Z) \times f_{act}(Input) - X$ $\frac{dY}{dt} = f_{act}(X) - Y$ $\frac{dZ}{dt} = f_{inh}(Y) - Z$ |
| Type 3 negative feedback (motif 3) | $\frac{dX}{dt} = p_2 \times f_{act}(Z) + (1 - p_1 - p_2) \times f_{act}(Input) + p_1 \times f_{act}(Z) \times f_{act}(Input) - X$ $\frac{dY}{dt} = f_{inh}(X) - Y$ $\frac{dZ}{dt} = f_{act}(Y) - Z$ |

|                                    |                                                                                                                                                                                                     |
|------------------------------------|-----------------------------------------------------------------------------------------------------------------------------------------------------------------------------------------------------|
| Type 4 negative feedback (motif 4) | $\frac{dX}{dt} = p_2 \times f_{inh}(Z) + (1 - p_1 - p_2) \times f_{act}(Input) + p_1 \times f_{inh}(Z) \times f_{act}(Input) - X$ $\frac{dY}{dt} = f_{inh}(X) - Y$ $\frac{dZ}{dt} = f_{inh}(Y) - Z$ |
| Type 1 positive feedback (motif 5) | $\frac{dX}{dt} = p_2 \times f_{act}(Z) + (1 - p_1 - p_2) \times f_{act}(Input) + p_1 \times f_{act}(Z) \times f_{act}(Input) - X$ $\frac{dY}{dt} = f_{inh}(X) - Y$ $\frac{dZ}{dt} = f_{inh}(Y) - Z$ |
| Type 2 positive feedback (motif 6) | $\frac{dX}{dt} = p_2 \times f_{inh}(Z) + (1 - p_1 - p_2) \times f_{act}(Input) + p_1 \times f_{inh}(Z) \times f_{act}(Input) - X$ $\frac{dY}{dt} = f_{inh}(X) - Y$ $\frac{dZ}{dt} = f_{act}(Y) - Z$ |
| Type 3 positive feedback (motif 7) | $\frac{dX}{dt} = p_2 \times f_{inh}(Z) + (1 - p_1 - p_2) \times f_{act}(Input) + p_1 \times f_{inh}(Z) \times f_{act}(Input) - X$ $\frac{dY}{dt} = f_{act}(X) - Y$ $\frac{dZ}{dt} = f_{inh}(Y) - Z$ |



|                                        |                                                                                                                                                                                                     |
|----------------------------------------|-----------------------------------------------------------------------------------------------------------------------------------------------------------------------------------------------------|
| Type 4 positive feedback (motif 8)     | $\frac{dX}{dt} = p_2 \times f_{act}(Z) + (1 - p_1 - p_2) \times f_{act}(Input) + p_1 \times f_{act}(Z) \times f_{act}(Input) - X$ $\frac{dY}{dt} = f_{act}(X) - Y$ $\frac{dZ}{dt} = f_{act}(Y) - Z$ |
| Type 1 coherent feedforward (motif 9)  | $\frac{dX}{dt} = f_{act}(Input) - X$ $\frac{dY}{dt} = f_{act}(X) - Y$ $\frac{dZ}{dt} = p_2 \times f_{act}(Y) + (1 - p_1 - p_2) \times f_{act}(X) + p_1 \times f_{act}(Y) \times f_{act}(X) - Z$     |
| Type 2 coherent feedforward (motif 10) | $\frac{dX}{dt} = f_{act}(Input) - X$ $\frac{dY}{dt} = f_{inh}(X) - Y$ $\frac{dZ}{dt} = p_2 \times f_{act}(Y) + (1 - p_1 - p_2) \times f_{inh}(X) + p_1 \times f_{act}(Y) \times f_{inh}(X) - Z$     |
| Type 3 coherent feedforward (motif 11) | $\frac{dX}{dt} = f_{act}(Input) - X$ $\frac{dY}{dt} = f_{act}(X) - Y$ $\frac{dZ}{dt} = p_2 \times f_{inh}(Y) + (1 - p_1 - p_2) \times f_{inh}(X) + p_1 \times f_{inh}(Y) \times f_{inh}(X) - Z$     |

|                                          |                                                                                                                                                                                                 |
|------------------------------------------|-------------------------------------------------------------------------------------------------------------------------------------------------------------------------------------------------|
| Type 4 coherent feedforward (motif 12)   | $\frac{dX}{dt} = f_{act}(Input) - X$ $\frac{dY}{dt} = f_{inh}(X) - Y$ $\frac{dZ}{dt} = p_2 \times f_{inh}(Y) + (1 - p_1 - p_2) \times f_{act}(X) + p_1 \times f_{inh}(Y) \times f_{act}(X) - Z$ |
| Type 1 incoherent feedforward (motif 13) | $\frac{dX}{dt} = f_{act}(Input) - X$ $\frac{dY}{dt} = f_{act}(X) - Y$ $\frac{dZ}{dt} = p_2 \times f_{inh}(Y) + (1 - p_1 - p_2) \times f_{act}(X) + p_1 \times f_{inh}(Y) \times f_{act}(X) - Z$ |
| Type 2 incoherent feedforward (motif 14) | $\frac{dX}{dt} = f_{act}(Input) - X$ $\frac{dY}{dt} = f_{inh}(X) - Y$ $\frac{dZ}{dt} = p_2 \times f_{inh}(Y) + (1 - p_1 - p_2) \times f_{inh}(X) + p_1 \times f_{inh}(Y) \times f_{inh}(X) - Z$ |
| Type 3 incoherent feedforward (motif 15) | $\frac{dX}{dt} = f_{act}(Input) - X$ $\frac{dY}{dt} = f_{act}(X) - Y$ $\frac{dZ}{dt} = p_2 \times f_{act}(Y) + (1 - p_1 - p_2) \times f_{inh}(X) + p_1 \times f_{act}(Y) \times f_{inh}(X) - Z$ |

|                                          |                                                                                                                                                                                                 |
|------------------------------------------|-------------------------------------------------------------------------------------------------------------------------------------------------------------------------------------------------|
| Type 4 incoherent feedforward (motif 16) | $\frac{dX}{dt} = f_{act}(Input) - X$ $\frac{dY}{dt} = f_{inh}(X) - Y$ $\frac{dZ}{dt} = p_2 \times f_{act}(Y) + (1 - p_1 - p_2) \times f_{act}(X) + p_1 \times f_{act}(Y) \times f_{act}(X) - Z$ |
|------------------------------------------|-------------------------------------------------------------------------------------------------------------------------------------------------------------------------------------------------|

**Supplementary Table S9.** Association of the network motifs and the dynamical features.

|             | Negative feedback | Positive feedback | Coherent feedforward | Incoherent feedforward |
|-------------|-------------------|-------------------|----------------------|------------------------|
| Adaptation  | +++               | +                 | -                    | +++                    |
| Memory      | -                 | ++                | -                    | -                      |
| Consistency | -                 | -                 | +++                  | -                      |
| Pulsation   | -                 | -                 | -                    | +++                    |

+++ : dynamics are observed significantly in all types of motifs regardless of the form of response function, ++ : dynamics are observed significantly in some types of motifs, + : dynamics are observed weakly in all types of motifs, - : no such dynamics observed

**Supplementray Table S10.** Dynamical features of the 16 network motifs.

1) Dynamical features of network motif: adaptation

|         | Lin         | Hill        | Sat         | Acc         |
|---------|-------------|-------------|-------------|-------------|
| Motif1  | 0.211±0.061 | 0.224±0.079 | 0.205±0.062 | 0.218±0.059 |
| Motif2  | 0.211±0.061 | 0.228±0.076 | 0.206±0.062 | 0.211±0.061 |
| Motif3  | 0.210±0.062 | 0.230±0.080 | 0.212±0.061 | 0.208±0.062 |
| Motif4  | 0.210±0.062 | 0.228±0.083 | 0.208±0.062 | 0.212±0.061 |
| Motif5  | 0.062±0.073 | 0.015±0.030 | 0.053±0.061 | 0.082±0.088 |
| Motif6  | 0.075±0.079 | 0.043±0.153 | 0.087±0.087 | 0.073±0.077 |
| Motif7  | 0.059±0.073 | 0.161±0.359 | 0.059±0.069 | 0.079±0.093 |
| Motif8  | 0.042±0.068 | 0.009±0.021 | 0.057±0.068 | 0.118±0.094 |
| Motif9  | 0.001±0.000 | 0.001±0.000 | 0.001±0.000 | 0.001±0.000 |
| Motif10 | 0.001±0.000 | 0.001±0.000 | 0.001±0.000 | 0.001±0.000 |
| Motif11 | 0.001±0.000 | 0.001±0.000 | 0.001±0.000 | 0.001±0.000 |
| Motif12 | 0.001±0.000 | 0.001±0.001 | 0.001±0.000 | 0.001±0.000 |
| Motif13 | 0.206±0.074 | 0.208±0.076 | 0.201±0.071 | 0.212±0.079 |
| Motif14 | 0.172±0.069 | 0.172±0.069 | 0.174±0.069 | 0.171±0.070 |
| Motif15 | 0.172±0.069 | 0.173±0.069 | 0.171±0.070 | 0.173±0.069 |
| Motif16 | 0.206±0.074 | 0.206±0.074 | 0.213±0.080 | 0.199±0.070 |

2) Dynamical features of network motif: pulsation

|        | Lin           | Hill          | Sat           | Acc           |
|--------|---------------|---------------|---------------|---------------|
| Motif1 | 0.0000±0.0000 | 0.0000±0.0000 | 0.0000±0.0000 | 0.0000±0.0000 |
| Motif2 | 0.0000±0.0000 | 0.0000±0.0000 | 0.0000±0.0000 | 0.0000±0.0000 |
| Motif3 | 0.0000±0.0000 | 0.0000±0.0000 | 0.0000±0.0000 | 0.0000±0.0000 |
| Motif4 | 0.0000±0.0000 | 0.0000±0.0000 | 0.0000±0.0000 | 0.0000±0.0000 |

|         |               |               |               |               |
|---------|---------------|---------------|---------------|---------------|
| Motif5  | 0.0000±0.0000 | 0.0000±0.0000 | 0.0000±0.0000 | 0.0000±0.0000 |
| Motif6  | 0.0000±0.0000 | 0.0000±0.0000 | 0.0000±0.0000 | 0.0000±0.0000 |
| Motif7  | 0.0000±0.0000 | 0.0000±0.0000 | 0.0000±0.0000 | 0.0000±0.0000 |
| Motif8  | 0.0000±0.0000 | 0.0000±0.0000 | 0.0000±0.0000 | 0.0000±0.0000 |
| Motif9  | 0.0000±0.0000 | 0.0000±0.0000 | 0.0000±0.0000 | 0.0000±0.0000 |
| Motif10 | 0.0000±0.0000 | 0.0000±0.0000 | 0.0000±0.0000 | 0.0000±0.0000 |
| Motif11 | 0.0000±0.0000 | 0.0000±0.0000 | 0.0000±0.0000 | 0.0000±0.0000 |
| Motif12 | 0.0000±0.0000 | 0.0000±0.0000 | 0.0000±0.0000 | 0.0000±0.0000 |
| Motif13 | 0.0009±0.0026 | 0.0016±0.0041 | 0.0009±0.0027 | 0.0008±0.0024 |
| Motif14 | 0.0009±0.0026 | 0.0016±0.0041 | 0.0010±0.0028 | 0.0007±0.0022 |
| Motif15 | 0.0009±0.0026 | 0.0020±0.0044 | 0.0008±0.0024 | 0.0009±0.0027 |
| Motif16 | 0.0009±0.0026 | 0.0020±0.0044 | 0.0007±0.0022 | 0.0010±0.0028 |

### 3) Dynamical features of network motif: memory

|         | Lin         | Hill        | Sat         | Acc         |
|---------|-------------|-------------|-------------|-------------|
| Motif1  | 0.000±0.001 | 0.002±0.004 | 0.000±0.001 | 0.000±0.001 |
| Motif2  | 0.001±0.001 | 0.001±0.002 | 0.001±0.001 | 0.001±0.001 |
| Motif3  | 0.001±0.001 | 0.002±0.003 | 0.001±0.001 | 0.001±0.001 |
| Motif4  | 0.000±0.000 | 0.001±0.001 | 0.000±0.000 | 0.000±0.000 |
| Motif5  | 0.044±0.057 | 0.000±0.000 | 0.052±0.063 | 0.033±0.043 |
| Motif6  | 0.072±0.098 | 0.017±0.070 | 0.051±0.072 | 0.084±0.099 |
| Motif7  | 0.039±0.054 | 0.000±0.000 | 0.060±0.073 | 0.021±0.031 |
| Motif8  | 0.012±0.015 | 0.000±0.000 | 0.068±0.111 | 0.002±0.003 |
| Motif9  | 0.000±0.000 | 0.000±0.000 | 0.000±0.000 | 0.000±0.000 |
| Motif10 | 0.000±0.000 | 0.001±0.000 | 0.000±0.000 | 0.000±0.000 |
| Motif11 | 0.000±0.001 | 0.000±0.000 | 0.000±0.000 | 0.000±0.000 |
| Motif12 | 0.000±0.000 | 0.000±0.000 | 0.000±0.000 | 0.000±0.000 |
| Motif13 | 0.000±0.000 | 0.000±0.000 | 0.000±0.000 | 0.000±0.000 |

|         |             |             |             |             |
|---------|-------------|-------------|-------------|-------------|
| Motif14 | 0.000±0.000 | 0.000±0.000 | 0.000±0.000 | 0.001±0.001 |
| Motif15 | 0.000±0.000 | 0.000±0.000 | 0.000±0.000 | 0.000±0.000 |
| Motif16 | 0.000±0.000 | 0.000±0.000 | 0.000±0.000 | 0.000±0.000 |

4) Dynamical features of network motif: consistency

|         | Lin   | Hill  | Sat   | Acc   |
|---------|-------|-------|-------|-------|
| Motif1  | 0.036 | 0.026 | 0.033 | 0.041 |
| Motif2  | 0.037 | 0.027 | 0.031 | 0.044 |
| Motif3  | 0.037 | 0.027 | 0.036 | 0.038 |
| Motif4  | 0.037 | 0.026 | 0.038 | 0.035 |
| Motif5  | 0.022 | 0.005 | 0.038 | 0.012 |
| Motif6  | 0.023 | 0.005 | 0.012 | 0.038 |
| Motif7  | 0.022 | 0.005 | 0.034 | 0.011 |
| Motif8  | 0.020 | 0.005 | 0.019 | 0.010 |
| Motif9  | 3.429 | 3.767 | 3.341 | 3.339 |
| Motif10 | 2.436 | 2.619 | 2.577 | 2.226 |
| Motif11 | 3.424 | 3.789 | 3.291 | 3.384 |
| Motif12 | 2.474 | 2.669 | 2.588 | 2.285 |
| Motif13 | 0.009 | 0.009 | 0.009 | 0.009 |
| Motif14 | 0.009 | 0.009 | 0.009 | 0.009 |
| Motif15 | 0.009 | 0.009 | 0.009 | 0.009 |
| Motif16 | 0.009 | 0.009 | 0.009 | 0.009 |

**Supplementray Table S11.** Results of the distribution perturbation analysis of the 16 network motifs.

1) Result of distribution perturbation analysis: association 1 (adaptation-negative feedback)

|               | Uniform | 1 marginal (pm1) | 1 marginal (pm2) | 2 marginal (pm1, pm2) |
|---------------|---------|------------------|------------------|-----------------------|
| Type 1 - Lin  | 0.1     | 0.392            | 0.353            | 0.772                 |
| Type 1 - Hill | 0.1     | 0.415            | 0.362            | 0.765                 |
| Type 1 - Sat  | 0.1     | 0.401            | 0.335            | 0.748                 |
| Type 1 - Acc  | 0.1     | 0.388            | 0.329            | 0.76                  |
| Type 2 - Lin  | 0.1     | 0.498            | 0.18             | 0.567                 |
| Type 2 - Hill | 0.1     | 0.483            | 0.16             | 0.554                 |
| Type 2 - Sat  | 0.1     | 0.52             | 0.207            | 0.647                 |
| Type 2 - Acc  | 0.1     | 0.516            | 0.205            | 0.623                 |
| Type 3 - Lin  | 0.1     | 0.392            | 0.332            | 0.721                 |
| Type 3 - Hill | 0.1     | 0.385            | 0.3              | 0.703                 |
| Type 3 - Sat  | 0.1     | 0.444            | 0.3              | 0.715                 |
| Type 3 - Acc  | 0.1     | 0.361            | 0.337            | 0.778                 |
| Type 4 - Lin  | 0.1     | 0.364            | 0.349            | 0.761                 |
| Type 4 - Hill | 0.1     | 0.323            | 0.401            | 0.824                 |
| Type 4 - Sat  | 0.1     | 0.38             | 0.352            | 0.793                 |
| Type 4 - Acc  | 0.1     | 0.425            | 0.287            | 0.704                 |

2) Result of distribution perturbation analysis: association 1 (memory-positive feedback)

|               | Uniform | 1 marginal (pm1) | 1 marginal (pm2) | 2 marginal (pm1, pm2) |
|---------------|---------|------------------|------------------|-----------------------|
| Type 1 - Lin  | 0.1     | 0.228            | 0.808            | 0.851                 |
| Type 1 - Hill | 0.1     | 0.227            | 0.816            | 0.85                  |
| Type 1 - Sat  | 0.1     | 0.232            | 0.821            | 0.862                 |
| Type 1 - Acc  | 0.1     | 0.209            | 0.788            | 0.841                 |

|               |     |       |       |       |
|---------------|-----|-------|-------|-------|
| Type 2 - Lin  | NA* | NA*   | NA*   | NA*   |
| Type 2 - Hill | 0.1 | 0.208 | 0.863 | 0.906 |
| Type 2 - Sat  | NA* | NA*   | NA*   | NA*   |
| Type 2 - Acc  | NA* | NA*   | NA*   | NA*   |
| Type 3 - Lin  | 0.1 | 0.175 | 0.878 | 0.879 |
| Type 3 - Hill | 0.1 | 0.203 | 0.817 | 0.848 |
| Type 3 - Sat  | 0.1 | 0.171 | 0.912 | 0.917 |
| Type 3 - Acc  | 0.1 | 0.218 | 0.829 | 0.862 |
| Type 4 - Lin  | 0.1 | 0.212 | 0.818 | 0.871 |
| Type 4 - Hill | 0.1 | 0.178 | 0.926 | 0.948 |
| Type 4 - Sat  | 0.1 | 0.211 | 0.81  | 0.861 |
| Type 4 - Acc  | 0.1 | 0.209 | 0.771 | 0.826 |

\*NA denotes 'not available'

### 3) Result of distribution perturbation analysis: association 1 (adaptation-incoherent feedforward)

|               | Uniform | 1 marginal (pm1) | 1 marginal (pm2) | 2 marginal (pm1, pm2) |
|---------------|---------|------------------|------------------|-----------------------|
| Type 1 - Lin  | 0.1     | 0.357            | 0.391            | 0.853                 |
| Type 1 - Hill | 0.1     | 0.124            | 0.114            | 0.151                 |
| Type 1 - Sat  | 0.1     | 0.121            | 0.105            | 0.144                 |
| Type 1 - Acc  | 0.1     | 0.354            | 0.386            | 0.85                  |
| Type 2 - Lin  | 0.1     | 0.42             | 0.322            | 0.818                 |
| Type 2 - Hill | 0.1     | 0.123            | 0.144            | 0.166                 |
| Type 2 - Sat  | 0.1     | 0.108            | 0.115            | 0.139                 |
| Type 2 - Acc  | 0.1     | 0.384            | 0.33             | 0.796                 |
| Type 3 - Lin  | 0.1     | 0.318            | 0.447            | 0.874                 |
| Type 3 - Hill | 0.1     | 0.124            | 0.121            | 0.142                 |
| Type 3 - Sat  | 0.1     | 0.109            | 0.11             | 0.158                 |



|               |     |       |       |       |
|---------------|-----|-------|-------|-------|
| Type 3 - Acc  | 0.1 | 0.406 | 0.361 | 0.848 |
| Type 4 - Lin  | 0.1 | 0.383 | 0.357 | 0.826 |
| Type 4 - Hill | 0.1 | 0.106 | 0.124 | 0.179 |
| Type 4 - Sat  | 0.1 | 0.11  | 0.109 | 0.129 |
| Type 4 - Acc  | 0.1 | 0.289 | 0.466 | 0.867 |

4) Result of distribution perturbation analysis: association 1 (adaptation-negative feedback)

|               | Uniform | 1 marginal (pm1) | 1 marginal (pm2) | 2 marginal (pm1, pm2) |
|---------------|---------|------------------|------------------|-----------------------|
| Type 1 - Lin  | 0.1     | 0.158            | 0.263            | 0.302                 |
| Type 1 - Hill | 0.1     | 0.132            | 0.287            | 0.29                  |
| Type 1 - Sat  | 0.1     | 0.132            | 0.288            | 0.323                 |
| Type 1 - Acc  | 0.1     | 0.13             | 0.267            | 0.322                 |
| Type 2 - Lin  | 0.1     | 0.145            | 0.256            | 0.31                  |
| Type 2 - Hill | 0.1     | 0.148            | 0.273            | 0.318                 |
| Type 2 - Sat  | 0.1     | 0.119            | 0.27             | 0.281                 |
| Type 2 - Acc  | 0.1     | 0.125            | 0.234            | 0.275                 |
| Type 3 - Lin  | 0.1     | 0.134            | 0.255            | 0.311                 |
| Type 3 - Hill | 0.1     | 0.131            | 0.271            | 0.28                  |
| Type 3 - Sat  | 0.1     | 0.153            | 0.295            | 0.343                 |
| Type 3 - Acc  | 0.1     | 0.161            | 0.295            | 0.345                 |
| Type 4 - Lin  | 0.1     | 0.146            | 0.258            | 0.35                  |
| Type 4 - Hill | 0.1     | 0.151            | 0.294            | 0.362                 |
| Type 4 - Sat  | 0.1     | 0.133            | 0.281            | 0.333                 |
| Type 4 - Acc  | 0.1     | 0.138            | 0.259            | 0.277                 |

**Supplementray Table S12.** Differential equations of the EGFR model.

| Eq. no. | Differential equation                                                                                                                                                                                                                                                                                                                                                                                                                                        |
|---------|--------------------------------------------------------------------------------------------------------------------------------------------------------------------------------------------------------------------------------------------------------------------------------------------------------------------------------------------------------------------------------------------------------------------------------------------------------------|
| (1)     | $\frac{d[EGFR]}{dt} = Inputs - EGFR$                                                                                                                                                                                                                                                                                                                                                                                                                         |
| (2)     | $\begin{aligned} \frac{d[Grb2SoS]}{dt} = & pm_{gs1} \times f_{act}(GAB1) + pm_{gs2} \times f_{inh}(ERK) + (add_{gs} - pm_{gs1} - pm_{gs2}) \times f_{act}(EGFR) + \\ & pm_{gs12} \times f_{act}(GAB1) \times f_{inh}(ERK) + pm_{gs23} \times f_{inh}(ERK) \times f_{act}(EGFR) + pm_{gs31} \times f_{act}(EGFR) \times f_{act}(GAB1) + \\ & pm_{syngs123} \times f_{act}(GAB1) \times f_{inh}(ERK) \times f_{act}(EGFR) - Grb2Sos \end{aligned}$             |
| (3)     | $\frac{d[Src]}{dt} = f_{act}(EGFR) - Src$                                                                                                                                                                                                                                                                                                                                                                                                                    |
| (4)     | $\begin{aligned} \frac{d[PI3K]}{dt} = & pm_{piik1} \times f_{act}(GAB1) + pm_{piik2} \times f_{act}(Ras) + (add_{piik} - pm_{piik1} - pm_{piik2}) \times f_{act}(EGFR) + \\ & pm_{piik12} \times f_{act}(GAB1) \times f_{act}(Ras) + pm_{piik23} \times f_{act}(Ras) \times f_{act}(EGFR) + pm_{piik31} \times f_{act}(EGFR) \times f_{act}(GAB1) + \\ & pm_{synpiik123} \times f_{act}(GAB1) \times f_{act}(Ras) \times f_{act}(EGFR) - PI3K \end{aligned}$ |
| (5)     | $\begin{aligned} \frac{d[Ras]}{dt} = & pm_{ras} \times f_{inh}(RasGAP) + (add_{ras} - pm_{ras}) \times f_{act}(Grb2Sos) + pm_{synras} \times f_{inh}(RasGAP) \times f_{act}(Grb2Sos) \\ & - Ras \end{aligned}$                                                                                                                                                                                                                                               |
| (6)     | $\begin{aligned} \frac{d[GAB1]}{dt} = & pm_{gab1} \times f_{act}(Src) + pm_{gab2} \times f_{act}(PIP3) + (add_{gab} - pm_{gab1} - pm_{gab2}) \times f_{inh}(ERK) + \\ & pm_{gab12} \times f_{act}(Src) \times f_{act}(PIP3) + pm_{gab23} \times f_{act}(PIP3) \times f_{inh}(ERK) + pm_{gab31} \times f_{inh}(ERK) \times f_{act}(Src) + \\ & pm_{syngab123} \times f_{act}(Src) \times f_{act}(PIP3) \times f_{inh}(ERK) - GAB1 \end{aligned}$              |
| (7)     | $\frac{d[MEK]}{dt} = f_{act}(Ras) - k_i \times MEK *$                                                                                                                                                                                                                                                                                                                                                                                                        |

|      |                                                                                                                                                                                                                                                                                                                                                                                                                                                                                        |
|------|----------------------------------------------------------------------------------------------------------------------------------------------------------------------------------------------------------------------------------------------------------------------------------------------------------------------------------------------------------------------------------------------------------------------------------------------------------------------------------------|
| (8)  | $\frac{d[ERK]}{dt} = f_{act}(MEK) - ERK$                                                                                                                                                                                                                                                                                                                                                                                                                                               |
| (9)  | $\begin{aligned} \frac{d[RasGAP]}{dt} = & pm_{rasgap1} \times f_{act}(GAB1) + pm_{rasgap2} \times f_{inh}(SHP2) + (add_{rasgap} - pm_{rasgap1} - pm_{rasgap2}) \times f_{act}(EGFR) + \\ & pm_{rasgap12} \times f_{act}(GAB1) \times f_{inh}(SHP2) + pm_{rasgap23} \times f_{inh}(SHP2) \times f_{act}(EGFR) + \\ & pm_{rasgap31} \times f_{act}(EGFR) \times f_{act}(GAB1) + pm_{synrasgap123} \times f_{act}(GAB1) \times f_{inh}(SHP2) \times f_{act}(EGFR) - RasGAP \end{aligned}$ |
| (10) | $\frac{d[PIP3]}{dt} = f_{act}(PI3K) - PIP3$                                                                                                                                                                                                                                                                                                                                                                                                                                            |
| (11) | $\frac{d[SHP2]}{dt} = f_{act}(GAB1) - SHP2$                                                                                                                                                                                                                                                                                                                                                                                                                                            |
| (12) | $\frac{d[PDK1]}{dt} = f_{act}(PIP3) - PDK1$                                                                                                                                                                                                                                                                                                                                                                                                                                            |
| (13) | $\frac{d[AKT]}{dt} = f_{act}(PDK1) - AKT$                                                                                                                                                                                                                                                                                                                                                                                                                                              |

\* The effect of the MEK inhibitor is represented by the parameter  $ki$

**Supplementray Table S13.** Relationship between interactions and parameters in the EGFR model.

| Link                                             | Related parameter            | Constraints of parameter                                                                                                                                                                                   |
|--------------------------------------------------|------------------------------|------------------------------------------------------------------------------------------------------------------------------------------------------------------------------------------------------------|
| Effect of GAB1 on Grb2SoS                        | $pm_{gs1}$                   | $pm_{syngs}^* + pm_{gs1}^* + pm_{gs2}^* \leq 1$                                                                                                                                                            |
| Effect of ERK on Grb2SoS                         | $pm_{gs2}$                   | $0 \leq pm_{syngs}, pm_{gs1}, pm_{gs2} \leq 1$                                                                                                                                                             |
| Effect of EGFR on Grb2SoS                        | $pm_{gs3}$                   | $add_{syngs} = 1 - pm_{syngs}$<br>$pm_{gs3} = add_{syngs} - pm_{gs1} - pm_{gs2}$                                                                                                                           |
| Synergistic effect of GAB1 and ERK on Grb2SoS    | $pm_{gs12}$                  | $sum_{gs} = pm_{gs1} \times pm_{gs2} + pm_{gs2} \times pm_{gs3} + pm_{gs3} \times pm_{gs1}$                                                                                                                |
| Synergistic effect of ERK and EGFR on Grb2SoS    | $pm_{gs23}$                  | $pm_{syngs123} = pm_{syngs} \times pm_{syngs}$                                                                                                                                                             |
| Synergistic effect of EGFR and GAB1 on Grb2SoS   | $pm_{gs31}$                  | $pm_{gs12} = (pm_{gs1} \times pm_{gs2} / sum_{gs}) \times (pm_{syngs} - pm_{syngs123})$                                                                                                                    |
| Synergistic effect of GAB1, ERK, EGFR on Grb2SoS | $pm_{syngs123}$              | $pm_{gs23} = (pm_{gs2} \times pm_{gs3} / sum_{gs}) \times (pm_{syngs} - pm_{syngs123})$<br>$pm_{gs31} = (pm_{gs3} \times pm_{gs1} / sum_{gs}) \times (pm_{syngs} - pm_{syngs123})$                         |
| Effect of GAB1 on PI3K                           | $pm_{pitk1}$                 | $pm_{synpitk}^* + pm_{pitk1}^* + pm_{pitk2}^* \leq 1$                                                                                                                                                      |
| Effect of Ras on PI3K                            | $pm_{pitk2}$                 | $0 \leq pm_{synpitk}, pm_{pitk1}, pm_{pitk2} \leq 1$                                                                                                                                                       |
| Effect of EGFR on PI3K                           | $pm_{pitk3}$                 | $add_{synpitk} = 1 - pm_{synpitk}$<br>$pm_{pitk3} = add_{synpitk} - pm_{pitk1} - pm_{pitk2}$                                                                                                               |
| Synergistic effect of GAB1 and Ras on PI3K       | $pm_{pitk12}$                | $sum_{pitk} = pm_{pitk1} \times pm_{pitk2} + pm_{pitk2} \times pm_{pitk3} + pm_{pitk3} \times pm_{pitk1}$                                                                                                  |
| Synergistic effect of Ras and EGFR on PI3K       | $pm_{pitk23}$                | $pm_{synpitk123} = pm_{synpitk} \times pm_{synpitk}$                                                                                                                                                       |
| Synergistic effect of EGFR and GAB1 on PI3K      | $pm_{pitk31}$                | $pm_{pitk12} = (pm_{pitk1} \times pm_{pitk2} / sum_{pitk}) \times (pm_{synpitk} - pm_{synpitk123})$                                                                                                        |
| Synergistic effect of GAB1, Ras, EGFR on PI3K    | $pm_{synpitk123}$            | $pm_{pitk23} = (pm_{pitk2} \times pm_{pitk3} / sum_{pitk}) \times (pm_{synpitk} - pm_{synpitk123})$<br>$pm_{pitk31} = (pm_{pitk3} \times pm_{pitk1} / sum_{pitk}) \times (pm_{synpitk} - pm_{synpitk123})$ |
| Effect of RasGAP on Ras                          | $pm_{ras}$                   | $pm_{ras}^* + pm_{synras}^* \leq 1$                                                                                                                                                                        |
| Effect of Grb2SoS on Ras                         | $1 - pm_{ras} - pm_{synras}$ | $0 \leq pm_{ras}, pm_{synras} \leq 1$                                                                                                                                                                      |
| Synergistic effect of RasGAP and Grb2SoS on Ras  | $pm_{synras}$                |                                                                                                                                                                                                            |

|                                        |                     |                                                                                                                                                                                                                                    |
|----------------------------------------|---------------------|------------------------------------------------------------------------------------------------------------------------------------------------------------------------------------------------------------------------------------|
| Effect of Src on GAB1                  | $pm_{gab1}$         | $pm_{syngab}^* + pm_{gab1}^* + pm_{gab2}^* \leq 1$                                                                                                                                                                                 |
| Effect of PIP3 on GAB1                 | $pm_{gab2}$         | $0 \leq pm_{syngab}, pm_{gab1}, pm_{gab2} \leq 1$                                                                                                                                                                                  |
| Effect of ERK on GAB1                  | $pm_{gab3}$         | $add_{syngab} = 1 - pm_{syngab}$<br>$pm_{gab3} = add_{syngab} - pm_{gab1} - pm_{gab2}$                                                                                                                                             |
| Synergistic effect of Src and PIP3     | $pm_{gab12}$        | $sum_{gab} = pm_{gab1} \times pm_{gab2} + pm_{gab2} \times pm_{gab3} + pm_{gab3} \times pm_{gab1}$                                                                                                                                 |
| Synergistic effect of PIP3 and ERK     | $pm_{gab23}$        | $pm_{syngab123} = pm_{syngab} \times pm_{syngab}$                                                                                                                                                                                  |
| Synergistic effect of ERK and Src      | $pm_{gab31}$        | $pm_{gab12} = (pm_{gab1} \times pm_{gab2} / sum_{gab}) \times (pm_{syngab} - pm_{syngab123})$                                                                                                                                      |
| Synergistic effect of Src, PIP3, ERK   | $pm_{syngab123}$    | $pm_{gab23} = (pm_{gab2} \times pm_{gab3} / sum_{gab}) \times (pm_{syngab} - pm_{syngab123})$<br>$pm_{gab31} = (pm_{gab3} \times pm_{gab1} / sum_{gab}) \times (pm_{syngab} - pm_{syngab123})$                                     |
| Effect of GAB1 on RasGAP               | $pm_{rasgap1}$      | $pm_{synrasgap}^* + pm_{rasgap1}^* + pm_{rasgap2}^* \leq 1$                                                                                                                                                                        |
| Effect of SHP2 on RasGAP               | $pm_{rasgap2}$      | $0 \leq pm_{synrasgap}, pm_{rasgap1}, pm_{rasgap2} \leq 1$                                                                                                                                                                         |
| Effect of EGFR on RasGAP               | $pm_{rasgap3}$      | $add_{synrasgap} = 1 - pm_{synrasgap}$<br>$pm_{rasgap3} = add_{synrasgap} - pm_{rasgap1} - pm_{rasgap2}$                                                                                                                           |
| Synergistic effect of GAB1 and SHP2    | $pm_{rasgap12}$     | $sum_{rasgap} = pm_{rasgap1} \times pm_{rasgap1} + pm_{rasgap2} \times pm_{rasgap3} + pm_{rasgap3} \times pm_{rasgap1}$                                                                                                            |
| Synergistic effect of SHP2 and EGFR    | $pm_{rasgap23}$     | $pm_{synrasgp123} = pm_{synrasgap} \times pm_{synrasgap}$                                                                                                                                                                          |
| Synergistic effect of EGFR and GAB1    | $pm_{rasgap31}$     | $pm_{rasgap12} = (pm_{rasgap1} \times pm_{rasgap2} / sum_{rasgap}) \times (pm_{synrasgap} - pm_{synrasgap123})$                                                                                                                    |
| Synergistic effect of GAB1, SHP2, EGFR | $pm_{synrasgap123}$ | $pm_{rasgap23} = (pm_{rasgap2} \times pm_{rasgap3} / sum_{rasgap}) \times (pm_{synrasgap} - pm_{synrasgap123})$<br>$pm_{rasgap31} = (pm_{rasgap3} \times pm_{rasgap1} / sum_{rasgap}) \times (pm_{synrasgap} - pm_{synrasgap123})$ |

\*The fourteen parameters (i.e.  $pm_{syngs}$ ,  $pm_{gs1}$ ,  $pm_{gs2}$ ,  $pm_{synpitk}$ ,  $pm_{pitk1}$ ,  $pm_{pitk2}$ ,  $pm_{ras}$ ,  $pm_{synras}$ ,  $pm_{syngab}$ ,  $pm_{gab1}$ ,  $pm_{gab2}$ ,  $pm_{synrasgap}$ ,  $pm_{rasgap1}$ ,  $pm_{rasgap2}$ ) are sampled from uniform distribution ranging from 0 to 1.

**Supplementray Table S14.** Results of the distribution perturbation analysis of the EGFR network.

| A perturbed parameter distribution | Lin   | Hill  | Sat   | Acc   |
|------------------------------------|-------|-------|-------|-------|
| pm <sub>syngs</sub>                | 0.511 | 0.561 | 0.343 | 0.369 |
| pm <sub>gs1</sub>                  | 0.435 | 0.547 | 0.311 | 0.323 |
| pm <sub>gs2</sub>                  | 0.458 | 0.519 | 0.302 | 0.305 |
| pm <sub>synpitk</sub>              | 0.060 | 0.325 | 0.169 | 0.000 |
| pm <sub>pitk1</sub>                | 0.416 | 0.042 | 0.129 | 0.321 |
| pm <sub>pitk2</sub>                | 0.000 | 0.000 | 0.000 | 0.037 |
| pm <sub>ras</sub>                  | 0.888 | 0.655 | 0.478 | 0.710 |
| pm <sub>synras</sub>               | 0.622 | 0.655 | 0.435 | 0.415 |
| pm <sub>syngab</sub>               | 0.619 | 0.531 | 0.472 | 0.576 |
| pm <sub>gab1</sub>                 | 1.000 | 1.000 | 1.000 | 0.510 |
| pm <sub>gab2</sub>                 | 0.813 | 0.473 | 0.595 | 1.000 |
| pm <sub>synrasgap</sub>            | 0.226 | 0.218 | 0.181 | 0.073 |
| pm <sub>rasgap1</sub>              | 0.129 | 0.246 | 0.170 | 0.052 |
| pm <sub>rasgap2</sub>              | 0.219 | 0.305 | 0.203 | 0.064 |

## Supplementary Texts

### Supplementary Text S1. Analysis of network motifs

#### I. Construction of the 16 network motifs

We constructed 16 network motifs (i.e. 4 negative feedbacks (motif 1, 2, 3, and 4), 4 positive feedbacks (motif 5, 6, 7, and 8), 4 coherent feedforward loops (motif 9, 10, 11, and 12), 4 incoherent feedforward loops (motif 13, 14, 15, and 16)) (Fig. S3A). Input signal was given to X and the time course of Z was observed. From the simulation data of Z in each network motif, we evaluated the presence of the dynamical features (i.e., adaptation, memory, pulsation, and consistency) (Fig. S3A). Adaptation means how the variables return to original value after the response to the input signal. It is calculated as the product of sensitivity and 1-precision. Memory means if the variable remember the input signal after it vanishes. Pulsation is the ability to generate pulse at the moment of input signal is given or is removed. Consistency measures similarity between the values of Z at each time point between those evaluated at different parameter sets.

#### II. Normalized equation modeling of the 16 network motifs

Differential equations of each model are made according to the principles described in METHODS (differential equations for all models are provided in Table S8). Each model has two parameters: p1 represents synergistic effect of two links while p2 represents dominant effect of one link over that of the other. p2 means dominant effect from Z to X over Input to X in negative feedback and positive feedback motifs while p2 means dominant effect from Y to Z over X to Z in coherent feedforward and incoherent feedforward motifs. Parameter p1 and p2 were sampled from uniform distribution between 0 and 1 with constraint that the sum of p1 and p2 should be less than or equal to 1. Total 1,000 parameter sets were generated. For each model and for each form of the response function, for each parameter set, numerical simulation was performed using ode15s function in the MATLAB R2009a (i.e. total 64,000 (16×4×1,000) simulations were conducted). Input signal is given from t=10 to t=100. Dynamical features are evaluated for every simulation.

### **III. Observed dynamical characteristics in the 16 network motifs**

Adaptation was mainly observed in negative feedback (motif 1, 2, 3, and 4) and incoherent feedforward motifs (motif 13, 14, 15, and 16). The result was consistent regardless of the form of the response function. Memory was only observed in positive feedback motifs (motif 5, 6, 7, and 8) except for motif 5 with Hill, motif 7 with Hill, and motif 8 with Hill. Consistency was observed in all coherent feedforward motifs (motif 9, 10, 11, and 12) regardless of the form of the response function. Pulsation was observed in incoherent feedforward motifs (mainly with the function 'Hill'). From the results, we can conclude that the specific dynamical features are associated with the specific network motifs. These features may be determined by network structure of the motifs rather than the detailed arrangement of the links inside the motifs or form of the response functions. Therefore, dynamics of the network was successfully represented by normalized equation modeling. In Table S9, we summarized the association of network motifs and dynamical features. These results were consistent with previous studies (Table S10) (1, 2).

### **IV. Calculation of marginal distributions of the parameters**

Then, which link is associated with the dynamical features? For example, which link is related with the property of adaption in type 1 negative feedback motif? To investigate the question, we observed the shape of the marginal distributions for the parameters in four such associations: association 1 - adaptation with negative feedback motifs, association 2 - adaptation with incoherent feedforward motifs, association 3 - memory with positive feedback motifs, association 4 - pulsation with incoherent feedforward motifs. Marginal distribution was calculated for the parameters that show upper 10% of the dynamics of interest for each association (Fig. S3A).

#### **IV-1. Association 1: adaptation in negative feedback motifs**

High  $p_1$  and low  $p_2$  were associated with adaptation in all types of negative feedback motifs. That is, the higher the synergistic effect of Input and Z, the lower the lower the dominant effect of Z to X in inhibition of X, adaptation can be observed more frequently. Therefore, coordination of two links in regulation of X may be important to generate the



dynamical feature, "adaptation". The distributions were similar regardless of the form of the response functions.

#### **IV-2. Association 2: adaptation in incoherent feedforward motifs**

For adaptation, different distributions of parameters were observed depending on the type of incoherent feedforward motifs (in motif 13 and 16, high  $p_1$  and low  $p_2$  was associated with adaptation while low  $p_1$  and high  $p_2$  was associated with adaptation in motif 14 and motif 15). However, the marginal distributions were not different according to the form of response functions.

#### **IV-3. Association 3: memory in positive feedback motifs**

Calculation of marginal distributions for type 1 positive feedback with Hill, type 3 positive feedback with Hill, and type 4 positive feedback with Hill was impossible because of zero or small number of cases. Except for these, low  $p_1$  and high  $p_2$  are associated with memory. That is, the lower the synergistic effect of Input and Z, the higher the dominant effect of Z to X in activation of X, adaptation can be observed more frequently. Therefore, positive feedback link may take a role to generate the dynamical feature, "memory".

#### **IV-4. Association 4: pulsation in incoherent feedforward motifs**

Low  $p_1$  and medium  $p_2$  were associated with pulsation in all types of incoherent feedforward motifs. That is, pulsation was observed more frequently when the synergistic effect of Input and Z was low and the effect of Y on Z (indirect effect for the activation of Z) was neither high nor low. The latter is an interesting point. Therefore, coordination of direct effect (i.e. X on Z) and indirect effect (i.e. Y on Z) may be required to generate the dynamical feature, "pulsation". The distributions were similar regardless of the form of the response functions.

## **V. Distribution perturbation analysis**

Although distinct distributions of parameters were observed for specific dynamics in all previously investigated network-dynamics associations, it does not always imply that these distributions generate the dynamics. To further investigate this issue, we performed "distribution perturbation analysis". After the one or two parameters were sampled from marginal distribution while the others were sampled from uniform distribution, numerical simulation was performed and change of phenotypes (or dynamics) was evaluated. If the results showed certain dynamics more frequently, it will suggest that the distribution generates the dynamics. For one distribution perturbation analysis, we sampled the value of one parameter ( $p_1$  or  $p_2$ ) from marginal distribution whereas the other ( $p_2$  or  $p_1$ ) was sampled from uniform distribution. For two distribution perturbation analysis, we sampled both parameters ( $p_1$  and  $p_2$ ) from marginal distribution. One constraint required to be satisfied during the process of random sampling is that the sum of  $p_1$  and  $p_2$  is less 1. The results of distribution perturbation analyses were demonstrated Fig. S4 and Table S11.

### **V-1. Association 1: adaptation in negative feedback motifs**

For all types of negative feedback motifs and all forms of response functions, perturbation of any one distribution and two distributions generated more degree of adaptation. The perturbation effect of the two distributions was always larger than that of one marginal distribution. This results implies that high  $p_1$  and low  $p_2$  (i.e., strong synergistic effect with dominant role of input) actively generates the dynamical feature, adaptation.

### **V-2. Association 2: adaptation in incoherent feedforward motifs**

Distribution perturbation has more impacts in type 1 and type 4 than in type 2 and type 3. That is, marginal distributions of  $p_1$  and  $p_2$  in motif 14 and motif 15 do not have significant causal relationship with adaptation.

### **V-3. Association 3: memory in positive feedback motifs**

For all types of positive feedback motifs and all forms of response functions, distribution

perturbation of  $p_2$  generates memory more effectively. In addition, differences are very slight between the results of distribution perturbation of  $p_2$  and those of distribution perturbation of both  $p_1$  and  $p_2$ . These results imply that high  $p_2$  have more significant causal relationship with memory than low  $p_1$ .

#### **V-4. Association 4: pulsation in incoherent feedforward motifs**

For all types and all forms of response functions, perturbation of any one distribution and two distribution generated more degree of adaptation. The perturbation effect of two distributions was always larger than that of one distribution. This results implies that low  $p_1$  and medium  $p_2$  (i.e., strong synergistic effect with dominant role of input) actively generates the dynamical feature, pulsation.

### **VI. Summary**

Normalized equation modeling revealed well-known dynamical features of network motifs: negative feedback and incoherent feedforward motifs showed adaptation; positive feedback motifs showed memory; coherent feedforward motif showed consistency. Furthermore, the conditions for the dynamic features can be identified through distribution perturbation analysis. Most of the results were consistent regardless of the form of the response function which strengthen the reliability of the developed method.

## **Supplementray Text S2. Analysis of the EGFR network**

### **I. Construction of the EGFR network**

Network structure is the simplified form of the previously constructed EGFR network (Fig. S5A).

### **II. Normalized equation modeling of the EGFR network.**

Differential equations of each model are made according to the principles described in METHODS (differential equations for all models are provided in Table S12). The model requires 14 parameters (i.e.  $p_{m_{syngs}}$ ,  $p_{m_{gs1}}$ ,  $p_{m_{gs2}}$ ,  $p_{m_{synpitk}}$ ,  $p_{m_{pitk1}}$ ,  $p_{m_{pitk2}}$ ,  $p_{m_{ras}}$ ,  $p_{m_{synras}}$ ,  $p_{m_{syngab}}$ ,  $p_{m_{gab1}}$ ,  $p_{m_{gab2}}$ ,  $p_{m_{synrasgap}}$ ,  $p_{m_{rasgap1}}$ ,  $p_{m_{rasgap2}}$ ) which are sampled from standard uniform distribution. The remaining parameter can be calculated from the sampled parameters. In this manner, 100,000 parameter sets were randomly generated. The detailed information of the parameters is provided in Table S13.

### **III. Measurement of the MEK inhibitor resistance**

Numerical simulation was performed using ode15s function in the MATLAB R2009a. MEK inhibitor is treated at  $t=100$  (Fig. S5B). The resistance of the MEK inhibitor was calculated as the increased amount of AKT after MEK inhibitor is given.

### **IV. Marginal distribution of parameters**

To find out which parameter is associated with MEK inhibitor resistance, we investigated the marginal distributions of all 14 parameters. Marginal distribution was calculated for the parameter sets that showed top 10% of the MEK inhibitor resistance. Among 14 parameters, six parameters ( $p_{m_{gs2}}$ ,  $p_{m_{pitk1}}$ ,  $p_{m_{synras}}$ ,  $p_{m_{ras}}$ ,  $p_{m_{synrasgap}}$ ,  $p_{m_{rasgap}}$ ) represented non-uniform, coherent marginal distributions (Fig. S5C).

### **V. One-distribution perturbation analyses**

The presence of the association between MEK inhibitor resistance and marginal

distribution of parameters do not always imply the inducing relationship between them. To evaluate the inducing relationship, we performed one-distribution perturbation analyses. As a result, the marginal distributions of eight parameters (i.e.,  $pm_{syngs}$ ,  $pm_{gs1}$ ,  $pm_{gs2}$ ,  $pm_{synras}$ ,  $pm_{ras}$ ,  $pm_{syngab}$ ,  $pm_{gab1}$ ,  $pm_{gab2}$ ) were shown to have the inducing relationship with the MEK inhibitor resistance (Table S14). These parameters represent the regulation of Grb2Sos (i.e.,  $pm_{syngs}$ ,  $pm_{gs1}$ ,  $pm_{gs2}$ ), Ras (i.e.,  $pm_{synras}$ ,  $pm_{ras}$ ), and GAB1 (i.e.,  $pm_{syngab}$ ,  $pm_{gab1}$ ,  $pm_{gab2}$ ). Among them, the importance of GAB1 regulation was supported by published experimental results (3).

## **VI. Summary**

We investigated the underlying mechanism of MEK inhibitor resistance in the EGFR network using normalized equation modeling and one-distribution perturbation analysis. The regulation of Grb2Sos, Ras, and GAB1 were identified as essential regulatory processes to generate MEK inhibitor resistance, among which GAB1 regulation had been also identified as a key process in previously published results.

**Supplementray Text S3.** Normalized equation modeling when one node is regulated by more than two nodes

Let us suppose that Y is regulated by A, B, and C (Fig. S6). Then the instantaneous rate of change in Y (dY/dt) is determined in consideration of these 7 influences: individual influence of A on Y (shortly, A on Y), individual influence of B on Y (B on Y), individual influence of C and Y (C on Y), combined influence of A and B on Y (AB on Y), combined influence of B and C on Y (BC on Y), combined influence of C and A on Y (CA on Y), combined influence of A, B, and C on Y (ABC on Y).

The seven influences can be divided by individual influences (i.e., A on Y, B on Y, C on Y) and combined influences (i.e., AB on Y, BC on Y, CA on Y, ABC on Y). The sum of combined influences (i.e., AB on Y + BC on Y + CA on Y + ABC on Y) is parameterized as p1. Then the sum of individual influences becomes 1-p1. p2 represents A on Y, and p3 represents B on Y. Then, C on Y is determined as 1-p1-p2-p3.

The four combined influences are determined using p1, p2, and p3. Since ABC on Y has double combinations, ABC on Y is determined as p1<sup>2</sup>. Then, the sum of remaining three combined influences becomes p1-p1<sup>2</sup>. AB on Y, BC on Y, and CA on Y are determined using A on Y, B on Y, and C on Y. Specifically, the ratio between AB on Y, BC on Y, CA on Y is determined to be equal to the ration between A on Y × B on Y, B on Y × C on Y, C on Y × A on Y. Since the sum is already known as p1-p1<sup>2</sup>, these three influences can be determined using a proportional expression. For example, if p1, p2, and p3 are 0.2, 0.4, and 0.25 respectively, seven influences are determined as follows: A on Y is 0.4; B on Y is 0.25; C on Y is 0.15 (i.e., 1-0.2-0.4-0.25); ABC on Y is 0.04 (i.e., 0.2 × 0.2); AB on Y is 0.081 (i.e.,  $\frac{0.1 \times 0.16}{0.1 + 0.0875 + 0.06}$ ); BC on Y is 0.0304 (i.e.,  $\frac{0.0875 \times 0.16}{0.1 + 0.0875 + 0.06}$ ); CA on Y is 0.0486 (i.e.,  $\frac{0.06 \times 0.16}{0.1 + 0.0875 + 0.06}$ ).

When one node is regulated by more than three nodes, the formulation of dY/dt can be constituted in the same manner.

## Supplementary Data Sets

**Supplementray Data Set S1.** Experimental database for the cardiac signaling pathways.

| Reference (PMID) | Experimental Setting                                                                                   | Input                                                         | Output           | Effect                    | Time                      |
|------------------|--------------------------------------------------------------------------------------------------------|---------------------------------------------------------------|------------------|---------------------------|---------------------------|
| 15781459         | The FOXO3a transcription factor regulates cardiac myocyte size downstream of AKT signaling             |                                                               |                  |                           |                           |
|                  |                                                                                                        | none                                                          | pFOXO1/3a/4/pAkt | 1                         | 10min                     |
|                  | NRVM                                                                                                   | IGF-1                                                         | pFOXO1           | 2                         | 10min                     |
|                  | NRVM                                                                                                   | IGF-1                                                         | pFOXO4           | 3                         | 10min                     |
|                  | NRVM                                                                                                   | IGF-1                                                         | pFOXO3a          | 1.5                       | 10min                     |
|                  | NRVM                                                                                                   | IGF-1                                                         | pAkt             | 2                         | 10min                     |
|                  | NRVM                                                                                                   | Insulin+LY294002                                              | pFOXO1/3a/4      | 1                         | 10min                     |
|                  | NRVM                                                                                                   | insulin+LY294002                                              | pAkt             | 1.5                       | 10min                     |
|                  | NRVM                                                                                                   | none                                                          | pAkt             | 1                         | 12hr                      |
|                  | NRVM+TM-FOXO3a                                                                                         | none                                                          | pAkt             | 2                         | 12hr                      |
|                  | NRVM+WT-FOXO3a                                                                                         | none                                                          | pAkt             | 2                         | 12hr                      |
|                  | TAC on mouse                                                                                           | none                                                          | pAkt/pFOXO3a     | 4/2                       | TAC 1wk                   |
|                  | NRVM                                                                                                   | IGF-1                                                         | cell size        | 1.4                       | 48hr                      |
|                  | NRVM+WT-FOXO3a                                                                                         | IGF-1                                                         | cell size        | 1.3                       | 24hr(IGF)+24 after TD     |
|                  | NRVM+TM-FOXO3a                                                                                         | IGF-1                                                         | cell size        | 0.85                      | 24hr(IGF)+24 after TD     |
|                  | NRVM                                                                                                   | stretch                                                       | cell size        | 1.3                       | 48hr                      |
|                  | NRVM+WT-FOXO3a                                                                                         | stretch                                                       | cell size        | 1.15                      | 24hr(stretch)+24 after TD |
| NRVM+TM-FOXO3a   | stretch                                                                                                | cell size                                                     | 0.9              | 24hr(stretch)+24 after TD |                           |
| 9363896          | Switching of the coupling of the beta2-adrenergic receptor to different G proteins by protein kinase A |                                                               |                  |                           |                           |
|                  | HEK293                                                                                                 | none                                                          | pMAPK            | 1                         | 5min                      |
|                  | HEK293                                                                                                 | Isoprenaline(10 <sup>-10</sup> -10 <sup>-9</sup> -8/-7/-6/-5) | pMAPK            | 1.2/2/4/5.5/6/5.8         | 5min                      |
|                  | HEK293                                                                                                 | Isoprenaline+Propranolol                                      | pMAPK            | 1                         | 5min                      |
| HEK293           | Isoprenaline                                                                                           | pMAPK                                                         | 6.5              | 5min                      |                           |

|          |                                                                                                                                                                                 |                     |                            |                                             |                      |
|----------|---------------------------------------------------------------------------------------------------------------------------------------------------------------------------------|---------------------|----------------------------|---------------------------------------------|----------------------|
|          | HEK293+bARKct TF                                                                                                                                                                | Isoprenaline        | pMAPK                      | 3                                           | 5min                 |
|          | HEK293                                                                                                                                                                          | Isoprenaline+PTX    | pMAPK                      | 1.7                                         | 5min                 |
|          | HEK293+Csk TF                                                                                                                                                                   | Isoprenaline        | pMAPK                      | 3                                           | 5min                 |
|          | HEK293+Sos-Pro TF                                                                                                                                                               | Isoprenaline        | pMAPK                      | 2.6                                         | 5min                 |
|          | HEK293                                                                                                                                                                          | Isoprenaline        | pMAPK                      | 7                                           | 5min                 |
|          | HEK293                                                                                                                                                                          | Isoprenaline+H-89   | pMAPK                      | 1.5                                         | 5min                 |
|          | HEK293                                                                                                                                                                          | LPA                 | pMAPK                      | 8                                           | 5min                 |
|          | HEK293                                                                                                                                                                          | LPA+H-89            | pMAPK                      | 8                                           | 5min                 |
|          | HEK293                                                                                                                                                                          | isoprenaline        | pMAPK                      | 5                                           | 5min                 |
|          | HEK293+ERK1<br>TF+b2ARWT TF                                                                                                                                                     | isoprenaline        | pMAPK                      | 7                                           | 5min                 |
|          | HEK293+ERK1<br>TF+b2ARmut TF                                                                                                                                                    | isoprenaline        | pMAPK                      | 3                                           | 5min                 |
|          | alpha1-Adrenoceptor stimulation potentiates L-type Ca <sup>2+</sup> current through Ca <sup>2+</sup> /calmodulin-dependent PK II(CaMKII) activation in rat ventricular myocytes |                     |                            |                                             |                      |
|          | Adult cardiomyocyte(Rat)                                                                                                                                                        | phenylephrine(10uM) | normalized<br>LTCC current | 1.0/0.95/0.9<br>9/0.92/0.9<br>8/1/1.15/1.18 | 0/1/2/3/4/5/10/15min |
|          | Adult cardiomyocyte(Rat)+BAPTA pretx                                                                                                                                            | phenylephrine(10uM) | normalized<br>LTCC current | 1/1/1/1/1/1/1/1                             | 0/1/2/3/4/5/10/15min |
| 15964981 | Adult cardiomyocyte(Rat)+KN-93(0.5uM) pretx                                                                                                                                     | phenylephrine(10uM) | normalized<br>LTCC current | 1.0/0.9/0.8<br>/0.8/0.79/0.76/0.7/0.65      | 0/1/2/3/4/5/10/15min |
|          | Adult cardiomyocyte(Rat)+KN-92(0.5uM) pretx                                                                                                                                     | phenylephrine(10uM) | normalized<br>LTCC current | 1.0/0.98/0.95/1.0/1.03/1.05/1.15/1.17       | 0/1/2/3/4/5/10/15min |
|          | Adult cardiomyocyte(Rat)+chelerythrine(10uM) pretx                                                                                                                              | phenylephrine(10uM) | normalized<br>LTCC current | 1.0/0.9/0.8<br>/0.77/0.75/0.7/0.55/0.       | 0/1/2/3/4/5/10/15min |



|          |                                                                                                                                                                    |                             |                     |                     |       |
|----------|--------------------------------------------------------------------------------------------------------------------------------------------------------------------|-----------------------------|---------------------|---------------------|-------|
|          |                                                                                                                                                                    |                             |                     | 45                  |       |
|          | Adult cardiomyocyte(Rat)                                                                                                                                           | control/phe(0.1uM)/1/10/100 | CaMKII activation   | 100/130/170/190/185 | 15min |
|          | Adult cardiomyocyte(Rat)                                                                                                                                           | control/prazosin/praphe     | CaMKII activation   | 100/100/105         | 15min |
|          | Adult cardiomyocyte(Rat)                                                                                                                                           | control/KN-93/KN-93+phe     | CaMKII activation   | 100/70/75           | 15min |
|          | Adult cardiomyocyte(Rat)                                                                                                                                           | control/che/che+phe         | CaMKII activation   | 100/85/99           | 15min |
| 15572667 | p38alpha Mitogen-Activated Protein Kinase Plays a Critical Role in Cardiomyocytes Survival but Not in Cardiac Hypertrophic Growth in Response to Pressure Overload |                             |                     |                     |       |
|          | control mouse                                                                                                                                                      | none                        | p38 kinase activity | 1                   |       |
|          | control                                                                                                                                                            | phenylephrine               | p38 kinase activity | 1.6                 | 30min |
|          | p38aCKO(10wk)                                                                                                                                                      | none                        | p38 kinase activity | 0.25                |       |
|          | p38aCKO(10wk)                                                                                                                                                      | phenylephrine               | p38 kinase activity | 0.4                 | 30min |
|          | control                                                                                                                                                            | none                        | FS                  | 37                  |       |
|          | p38aCKO(10wk)                                                                                                                                                      | none                        | FS                  | 37                  |       |
|          | p38aCKO(10wk)                                                                                                                                                      | TAC(1wk)                    | FS                  | 15                  |       |
|          | p38aCKO(10wk)                                                                                                                                                      | sham(1wk)                   | FS                  | 37                  |       |
|          | control                                                                                                                                                            | TAC(1wk)                    | FS                  | 37                  |       |
|          | control                                                                                                                                                            | sham(1wk)                   | FS                  | 37                  |       |
|          | control                                                                                                                                                            | sham(1wk)                   | TUNEL(+) myocytes   | 37                  |       |
|          | control                                                                                                                                                            | TAC(1wk)                    | TUNEL(+) myocytes   | 37                  |       |
|          | p38aCKO(10wk)                                                                                                                                                      | sham(1wk)                   | TUNEL(+) myocytes   | 37                  |       |
|          | p38aCKO(10wk)                                                                                                                                                      | TAC(1wk)                    | TUNEL(+)            | 115                 |       |

|  |               |                                        |                         |     |  |
|--|---------------|----------------------------------------|-------------------------|-----|--|
|  |               |                                        | myocytes                |     |  |
|  | control       | sham(1wk)                              | cytochrome c in cytosol | 1   |  |
|  | control       | TAC(1wk)                               | cytochrome c in cytosol | 1.5 |  |
|  | p38aCKO(10wk) | sham(1wk)                              | cytochrome c in cytosol | 1.3 |  |
|  | p38aCKO(10wk) | TAC(1wk)                               | cytochrome c in cytosol | 3.7 |  |
|  | control       | TAC(1wk)                               | Bax/Bcl                 | 1   |  |
|  | p38aCKO(10wk) | TAC(1wk)                               | Bax/Bcl                 | 1.7 |  |
|  | control       | sham(1wk)                              | pJNK/totalJNK           | 1   |  |
|  | control       | TAC(1wk)                               | pJNK/totalJNK           | 2.2 |  |
|  | p38aCKO(10wk) | sham(1wk)                              | pJNK/totalJNK           | 0.7 |  |
|  | p38aCKO(10wk) | TAC(1wk)                               | pJNK/totalJNK           | 3.5 |  |
|  | control       | sham(1wk)                              | pERK/totalERK           | 1   |  |
|  | control       | TAC(1wk)                               | pERK/totalERK           | 2   |  |
|  | p38aCKO(10wk) | sham(1wk)                              | pERK/totalERK           | 1   |  |
|  | p38aCKO(10wk) | TAC(1wk)                               | pERK/totalERK           | 2   |  |
|  | control       | sham(1wk)                              | pMKK3/6 / totalMKK3/6   | 1   |  |
|  | control       | TAC(1wk)                               | pMKK3/6 / totalMKK3/6   | 5   |  |
|  | p38aCKO(10wk) | sham(1wk)                              | pMKK3/6 / totalMKK3/6   | 5   |  |
|  | p38aCKO(10wk) | TAC(1wk)                               | pMKK3/6 / totalMKK3/6   | 40  |  |
|  | control       | saline                                 | LVDd                    | 3.5 |  |
|  | control       | isoproterenol(7.5mg/kg /day for 2days) | LVDd                    | 3.5 |  |
|  | p38aCKO(10wk) | saline                                 | LVDd                    | 3.5 |  |
|  | p38aCKO(10wk) | isoproterenol(7.5mg/kg /day for 2days) | LVDd                    | 4.5 |  |

|  |                    |                                        |                      |     |  |
|--|--------------------|----------------------------------------|----------------------|-----|--|
|  | control            | saline                                 | FS                   | 40  |  |
|  | control            | isoproterenol(7.5mg/kg /day for 2days) | FS                   | 48  |  |
|  | p38aCKO(10wk)      | saline                                 | FS                   | 38  |  |
|  | p38aCKO(10wk)      | isoproterenol(7.5mg/kg /day for 2days) | FS                   | 15  |  |
|  | control            | saline                                 | TUNEL(+)<br>myocytes | 23  |  |
|  | control            | isoproterenol(7.5mg/kg /day for 2days) | TUNEL(+)<br>myocytes | 26  |  |
|  | p38aCKO(10wk)      | saline                                 | TUNEL(+)<br>myocytes | 25  |  |
|  | p38aCKO(10wk)      | isoproterenol(7.5mg/kg /day for 2days) | TUNEL(+)<br>myocytes | 50  |  |
|  | control cell       | isoproterenol(0uM)                     | survival             | 100 |  |
|  | p38aCKO(10wk) cell | isoproterenol(0uM)                     | survival             | 100 |  |
|  | control cell       | isoproterenol(0.31uM)                  | survival             | 120 |  |
|  | p38aCKO(10wk) cell | isoproterenol(0.31uM)                  | survival             | 110 |  |
|  | control cell       | isoproterenol(0.63uM)                  | survival             | 110 |  |
|  | p38aCKO(10wk) cell | isoproterenol(0.63uM)                  | survival             | 105 |  |
|  | control cell       | isoproterenol(1.25uM)                  | survival             | 120 |  |
|  | p38aCKO(10wk) cell | isoproterenol(1.25uM)                  | survival             | 102 |  |
|  | control cell       | isoproterenol(2.5uM)                   | survival             | 120 |  |
|  | p38aCKO(10wk) cell | isoproterenol(2.5uM)                   | survival             | 50  |  |
|  | control cell       | isoproterenol(5uM)                     | survival             | 120 |  |
|  | p38aCKO(10wk) cell | isoproterenol(5uM)                     | survival             | 30  |  |
|  | control cell       | isoproterenol(10uM)                    | survival             | 50  |  |
|  | p38aCKO(10wk) cell | isoproterenol(10uM)                    | survival             | 25  |  |
|  | control cell       | isoproterenol(20uM)                    | survival             | 28  |  |
|  | p38aCKO(10wk) cell | isoproterenol(20uM)                    | survival             | 28  |  |
|  | control cell       | isoproterenol(40uM)                    | survival             | 28  |  |
|  | p38aCKO(10wk) cell | isoproterenol(40uM)                    | survival             | 28  |  |

| Selective repression of MEF2 activity by PKA-dependent proteolysis of HDAC4 |                                                                                                              |                              |        |             |      |
|-----------------------------------------------------------------------------|--------------------------------------------------------------------------------------------------------------|------------------------------|--------|-------------|------|
| 22042619                                                                    | H9C2 myocyte                                                                                                 | none                         | MEF2   | 1           |      |
|                                                                             | H9C2 myocyte                                                                                                 | dbcAMP(1mM)                  | MEF2   | 0.1         |      |
|                                                                             | H9C2 myocyte                                                                                                 | dbcAMP(1mM) +<br>KT5720(2uM) | MEF2   | 0.8         |      |
|                                                                             | COS cells                                                                                                    | Myc-PKA:none                 | MEF2   | 0.05        |      |
|                                                                             | COS cells+MEF2C                                                                                              | Myc-PKA:none                 | MEF2   | 1           |      |
|                                                                             | COS cells+MEF2C+HDAC4                                                                                        | Myc-PKA:none                 | MEF2   | 0.1         |      |
|                                                                             | COS<br>cells+MEF2C+HDAC4+CaM<br>KII                                                                          | Myc-PKA:none                 | MEF2   | 1.2         |      |
|                                                                             | COS cells                                                                                                    | Myc-PKA:low                  | MEF2   | 0.05        |      |
|                                                                             | COS cells+MEF2C                                                                                              | Myc-PKA:low                  | MEF2   | 1           |      |
|                                                                             | COS cells+MEF2C+HDAC4                                                                                        | Myc-PKA:low                  | MEF2   | 0.15        |      |
|                                                                             | COS<br>cells+MEF2C+HDAC4+CaM<br>KII                                                                          | Myc-PKA:low                  | MEF2   | 0.5         |      |
|                                                                             | COS cells                                                                                                    | Myc-PKA:high                 | MEF2   | 0.05        |      |
|                                                                             | COS cells+MEF2C                                                                                              | Myc-PKA:high                 | MEF2   | 1           |      |
|                                                                             | COS cells+MEF2C+HDAC4                                                                                        | Myc-PKA:high                 | MEF2   | 0.13        |      |
| COS<br>cells+MEF2C+HDAC4+CaM<br>KII                                         | Myc-PKA:high                                                                                                 | MEF2                         | 0.3    |             |      |
| 11435346                                                                    | Isoproterenol activates extracellular signal-regulated protein kinases in cardiomyocytes through calcineurin |                              |        |             |      |
|                                                                             | NRVM                                                                                                         | none                         | ERK1/2 | 0.1         |      |
|                                                                             | NRVM+thapsigargin/nifedipine/EGTA pretx                                                                      | none                         | ERK1/2 | 0.1/0.1/0.1 |      |
|                                                                             | NRVM                                                                                                         | Iso                          | ERK1/2 | 1           |      |
|                                                                             | NRVM+thapsigargin/nifedipine/EGTA pretx                                                                      | Iso                          | ERK1/2 | 0.5/0.2/0.2 |      |
|                                                                             | NRVM                                                                                                         | none                         | ERK1/2 | 0.1         | 8min |
| NRVM                                                                        | Iso                                                                                                          | ERK1/2                       | 1      | 8min        |      |

|          |                                                                          |                                                        |                         |                                 |                           |
|----------|--------------------------------------------------------------------------|--------------------------------------------------------|-------------------------|---------------------------------|---------------------------|
|          | NRVM+KN93/W7/CsA pretx                                                   | Iso                                                    | ERK1/2                  | 1.3/0.4/0.4                     | 8min                      |
|          | NRVM                                                                     | none                                                   | ERK1/2                  | 0.1                             | 8min                      |
|          | NRVM                                                                     | AngII                                                  | ERK1/2                  | 0.4                             | 8min                      |
|          | NRVM                                                                     | PHE                                                    | ERK1/2                  | 2                               | 8min                      |
|          | NRVM+CsA pretx                                                           | none                                                   | ERK1/2                  | 0.1                             | 8min                      |
|          | NRVM+CsA pretx                                                           | AngII                                                  | ERK1/2                  | 0.4                             | 8min                      |
|          | NRVM+CsA pretx                                                           | PHE                                                    | ERK1/2                  | 1.5                             | 8min                      |
|          | NRVM                                                                     | Iso(10uM)                                              | calcineurin             | 100/120/1<br>80/260/15<br>0/130 | 0/1/2/5/15/30min          |
|          | NRVM                                                                     | Iso(0/0.01/0.1/1/10/100<br>uM)                         | calcineurin             | 100/180/1<br>90/200/31<br>0/300 | 5min                      |
|          | NRVM                                                                     | Iso                                                    | Raf-1                   | 0.1/0.5/1/1<br>/1/0.5           | 0/1/2/5/10/15min          |
|          | NRVM+CsA pretx                                                           | Iso                                                    | Raf-1                   | 0.1/0.1/0.1<br>/0.1/0.1/0.<br>1 | 0/1/2/5/10/15min          |
|          | Epac mediates beta-adrenergic receptor-induced cardiomyocyte hypertrophy |                                                        |                         |                                 |                           |
|          | Rat myocardium                                                           | Sham/TAC                                               | Epac1 expression        | 1/1.6                           | 5day                      |
|          | ARVM                                                                     | Sham/Sham+8-<br>CPT/TAC/TAC+8-CPT                      | Cell area               | 100/110/1<br>10/140             | 24hr(8-CPT)               |
|          | ARVM                                                                     | Ad.GFP/Ad.GFP+8-<br>CPT/Ad.Epac/Ad.Epac<br>+8-CPT      | Cell area               | 100/115/1<br>05/130             | 36hr(Ad.Epac or 8-CPT)    |
|          | ARVM                                                                     | Ad.GFP/Ad.GFP+8-<br>CPT/Ad.Epac/Ad.Epac<br>+8-CPT      | Ras-GTP/total<br>Ras    | 0.1/0.7/0.3<br>/1               | 36hr(Ad.Epac)+5min(8-CPT) |
|          | ARVM                                                                     | Ad.GFP/Ad.GFP+Ad.R<br>asS17N/Ad.Epac/Ad.E<br>pac+8-CPT | [3H]-Leucine<br>uptake  | 100/105/1<br>20/85              | 1day(8-CPT)               |
|          | ARVM                                                                     | Ad.GFP/Ad.GFP+Ad.R<br>asS17N/Ad.Epac/Ad.E              | Calcineurin<br>activity | 100/150/2<br>20/130             | 30min(8-CPT)              |
| 18323524 |                                                                          |                                                        |                         |                                 |                           |

|  |                                                                                              |                                                       |                       |                                   |                        |
|--|----------------------------------------------------------------------------------------------|-------------------------------------------------------|-----------------------|-----------------------------------|------------------------|
|  |                                                                                              | pac+8-CPT                                             |                       |                                   |                        |
|  | ARVM                                                                                         | Ad.GFP/Ad.Epac1/Ad.Epac1+8-CPT/Ad.Epac1+8-CPT+KN-93   | P-CaMKII/total CaMKII | 1/1.2/3/1.2                       | 30min(8-CPT)           |
|  | ARVM                                                                                         | none/CsA/KN93/8-CPT/8-CPT+CsA/8-CPT+KN-93             | [3H]-Leucine uptake   | 100/95/96/150/115/98              | 24hr                   |
|  | NRVM                                                                                         | shCT/shCT+ISO/shEpac1/shEpac1+ISO                     | Cell area             | 100/150/104/130                   | 48hr(ISO)              |
|  | NRVM                                                                                         | shCT/shCT+ISO/shEpac1/shEpac1+ISO                     | ANF                   | 25/225/60/140                     | 48hr(ISO)              |
|  | ARVM                                                                                         | none/Ad.PKI/ISO/Ad.PKI+ISO                            | [3H]-Leucine uptake   | 110/95/150/140                    | 24hr(ISO)              |
|  | ARVM                                                                                         | none/Ad.PKI/ISO/Ad.PKI+ISO                            | PKA activity          | 80/70/180/90                      | 10min(ISO)             |
|  | ARVM                                                                                         | Ad.Epac1/Ad.Epac1+ISO/Ad.Epac1R279K/Ad.Epac1R279K+ISO | [3H]-Leucine uptake   | 100/135/115/115                   | 24hr                   |
|  | Human heart(NonFailing(NF)/Heart Failure(HF))                                                | none                                                  | Epac1 expression      | 1.0/2.0                           |                        |
|  | Epac enhances excitation-transcription coupling in cardiac myocytes                          |                                                       |                       |                                   |                        |
|  | ARVM                                                                                         | 8-CPT(10uM)                                           | nuclear HDAC5         | 1.0/1.0/0.87/0.72/0.66/0.63       | 0/10/20/30/40/50/60min |
|  | ARVM                                                                                         | endothelin(100nM)                                     | nuclear HDAC5         | 1.0/0.95/0.87/0.82/0.78/0.67/0.55 | 0/10/20/30/40/50/60min |
|  | NRVM                                                                                         | control/epac1WT TF                                    | MEF-2                 | 100/300                           |                        |
|  | NRVM                                                                                         | 8-CPT/KN93+8-CPT                                      | nuclear HDAC5         | 0.7/1.0                           |                        |
|  | beta-Adrenergic Pathway Induces Apoptosis through Calcineurin Activation in Cardiac Myocytes |                                                       |                       |                                   |                        |
|  | NRVM                                                                                         | control/Iso(10 <sup>-</sup>                           | % of TUNEL            | 4/5/10/15/                        | 48hr                   |

|          |                                                                                                                       |                                                                                                        |                           |                       |                   |
|----------|-----------------------------------------------------------------------------------------------------------------------|--------------------------------------------------------------------------------------------------------|---------------------------|-----------------------|-------------------|
|          |                                                                                                                       | 7)/Iso(10 <sup>-6</sup> )/Iso(10 <sup>-5</sup> )/Iso(5*10 <sup>-5</sup> )/Ionomycin(10 <sup>-6</sup> ) | positive cells            | 21/18                 |                   |
|          | NRVM                                                                                                                  | control/Iso(50uM)/CsA pretx(1hr)+Iso/FK506(1hr)+Iso/nifedipine(1hr)+Iso                                | % of TUNEL positive cells | 5/18/5/5/9            | 48hr              |
|          | NRVM                                                                                                                  | Iso(50uM)                                                                                              | pBad                      | 1/0.5/0.5/1           | 0/2/4/6hr         |
|          | NRVM                                                                                                                  | Iso(50uM)+FK506                                                                                        | pBad                      | 1/1/1/1               | 0/2/4/6hr         |
|          | NRVM                                                                                                                  | Iso(50uM)+nifedipine                                                                                   | pBad                      | 1/1/1/1               | 0/2/4/6hr         |
|          | NRVM                                                                                                                  | Iso(50uM)                                                                                              | Bcl-2                     | 1/1/1/1/1             | 0/6/12/24/48hr    |
|          | NRVM                                                                                                                  | Iso(50uM)                                                                                              | cytosolic cyt c           | 1/2/3/3               | 0/8/18/24hr       |
|          | Cardiomyocyte-specific inactivation of transcription factor CREB in mice                                              |                                                                                                        |                           |                       |                   |
| 17307839 | control                                                                                                               | none                                                                                                   | survival                  | 1.0/1.0/1.0/0.95/0.95 | 0/100/200/300/400 |
|          | Creb1 deficient mice                                                                                                  | none                                                                                                   | survival                  | 1.0/0.98/0.95/0.9/0.9 | 0/100/200/300/400 |
|          | control/creb1 deficient mice                                                                                          | none                                                                                                   | bcl-2 expression          | 100/100               |                   |
|          | Akt phosphorylates BAD in vitro                                                                                       |                                                                                                        |                           |                       |                   |
| 9346240  | 3T3 cells                                                                                                             | Vector/Active AKT TF/WT AKT TF/Inactive AKT TF                                                         | pBAD                      | 0/1/0/0               |                   |
|          | 3T3 cells                                                                                                             | none/PDGF/Wort+PDGF/LY294002+PDGF                                                                      | pBAD                      | 0.1/1/0.5/0.5         |                   |
|          | Induction of bcl-2 expression by phosphorylated CREB proteins during B-cell activation and rescue from apoptosis      |                                                                                                        |                           |                       |                   |
| 165545   | DHL-9 cells                                                                                                           | Basal Promoter/WtUREDRE/MutCRE                                                                         | bcl-2                     | 1.0/3.0/1.3           |                   |
|          | Activation of CaMKII $\delta$ C is a common intermediate of diverse death stimuli-induced heart muscle cell apoptosis |                                                                                                        |                           |                       |                   |
| 17296607 | ARCM                                                                                                                  | none                                                                                                   | TUNEL positive cells(%)   | 2/4/5/8/9             | 0/1/2/3/4day      |
|          | ARCM                                                                                                                  | CA-CaMKII $\delta$ c                                                                                   | TUNEL positive cells(%)   | 3/9/18/20/22          | 0/1/2/3/4day      |

|               |                                                                                                                                                           |                                           |                         |                    |                                      |
|---------------|-----------------------------------------------------------------------------------------------------------------------------------------------------------|-------------------------------------------|-------------------------|--------------------|--------------------------------------|
|               | ARCM                                                                                                                                                      | CA-CaMKII $\delta$ c+DN-CaMKII $\delta$ c | TUNEL positive cells(%) | 3/4/12/13/14       | 0/1/2/3/4day                         |
|               | ARCM                                                                                                                                                      | CA-CaMKII $\delta$ c+AIP                  | TUNEL positive cells(%) | 3/7/8/12/13        | 0/1/2/3/4day                         |
|               | ARCM                                                                                                                                                      | CA-CaMKII $\delta$ c+Bcl-XL               | TUNEL positive cells(%) | 3/5/10/12/14       | 0/1/2/3/4day                         |
|               | ARCM                                                                                                                                                      | CaMKII activity(1/2/3/5/7)                | TUNEL positive cells(%) | 4/6/14/16/17       | 24hr                                 |
| 19667065      | Identification of Novel in Vivo Phosphorylation Sites of the Human Proapoptotic Protein BAD: PORE-FORMING ACTIVITY OF BAD IS REGULATED BY PHOSPHORYLATION |                                           |                         |                    |                                      |
|               | HEK293+BAD TF+B-RAF TF                                                                                                                                    | DMSO/BAY43-9006 0.1uM/1uM/10uM            | pBAD(S75)               | 0.35/0.45/0.25     | 16hr TF + 22hr BAY                   |
|               | HEK293+BAD TF+B-RAF TF                                                                                                                                    | DMSO/BAY43-9006 0.1uM/1uM/10uM            | pBAD(S99)               | 0.4/0.4/0.05/0     | 16hr TF + 22hr BAY                   |
|               | HEK293+BAD TF+B-RAF TF                                                                                                                                    | DMSO/BAY43-9006 0.1uM/1uM/10uM            | pBAD(S118)              | 0.15/0.3/0.01/0.01 | 16hr TF + 22hr BAY                   |
|               | HEK293+BAD                                                                                                                                                | none                                      | Apoptotic cells(%)      | 25                 | 16hr TF + 30hr culture               |
|               | HEK293+BAD+B-RAF-KD                                                                                                                                       | none                                      | Apoptotic cells(%)      | 24                 | 16hr TF + 30hr culture               |
|               | HEK293+BAD+B-RAF                                                                                                                                          | none                                      | Apoptotic cells(%)      | 10                 | 16hr TF + 30hr culture               |
|               | HEK293+B-RAF                                                                                                                                              | none                                      | Apoptotic cells(%)      | 8                  | 16hr TF + 30hr culture               |
| 24248367      | Selective regulation of cyclic nucleotide phosphodiesterase PDE3A isoforms                                                                                |                                           |                         |                    |                                      |
|               | HEK293+PDE3A2                                                                                                                                             | Ctrl/ISO/PMA                              | PDE3A2-pS428            | 0.1/0.1/1.0        | ISO(1uM) 90s, PMA(10ng/ml) for 15min |
|               | HEK293+PDE3A1                                                                                                                                             | Ctrl/ISO/PMA                              | PDE3A1-pS312            | 0.1/1.0/0.1        | ISO(1uM) 90s, PMA(10ng/ml) for 15min |
|               | HEK293+PDE3A2                                                                                                                                             | Ctrl/ISO/IBMX/IBMX+ISO                    | PDE3A1-pS312            | 0.2/0.2/0.2/1.0    | ISO(1uM) 90s, PMA(10ng/ml) for 15min |
|               | HEK293+PDE3A2                                                                                                                                             | Ctrl/ISO/IBMX/IBMX+ISO                    | PDE3A1-pS312            | 0.1/0.2/0.2/1.0    | ISO(1uM) 90s, PMA(10ng/ml) for 15min |
|               | HEK293+PDE3A2                                                                                                                                             | PKA 0nM/10nM/100nM                        | PDE3A2-pS312            | 0.1/0.5/1.0        | 20min                                |
| HEK293+PDE3A1 | PKA                                                                                                                                                       | PDE3A1-pS312                              | 0.1/0.2/1.0             | 20min              |                                      |



|          |                                                                                                       |                      |                                               |                    |                               |
|----------|-------------------------------------------------------------------------------------------------------|----------------------|-----------------------------------------------|--------------------|-------------------------------|
|          |                                                                                                       | 0nM/10nM/100nM       |                                               |                    |                               |
|          | HEK293+PDE3A2                                                                                         | Ctrl/PMA/dBcAMP      | PDE3 activity                                 | 100/120/125        | PMA 15min, dBcAMP 1h          |
|          | HEK293+PDE3A1                                                                                         | Ctrl/ISO/PMA/dBcAMP  | PDE3 activity                                 | 100/100/100/145    | ISO 90s, PMA 15min, dBcAMP 1h |
| 23933582 | Differential regulation of cardiac excitation-contraction coupling by cAMP phosphodiesterase subtypes |                      |                                               |                    |                               |
|          | ARVM                                                                                                  | Ctrl/Bay/Iso/Iso+Bay | Fura2 ratio(% of diastolic ratio)             | 20/40/100/130      |                               |
|          | ARVM                                                                                                  | Ctrl/Bay/Iso/Iso+Bay | t1/2off relaxation(s) of calcium transient    | 0.45/0.4/0.25/0.25 |                               |
|          | ARVM                                                                                                  | Ctrl/Bay/Iso/Iso+Bay | Sarcomere shortening                          | 0.00333333         |                               |
|          | ARVM                                                                                                  | Ctrl/Bay/Iso/Iso+Bay | t1/2off relaxation(s) of sarcomere shortening | 0.5/0.35/0.15/0.15 |                               |
|          | ARVM                                                                                                  | Ctrl/Cil/Iso/Iso+Cil | Fura2 ratio(% of diastolic ratio)             | 20/45/100/140      |                               |
|          | ARVM                                                                                                  | Ctrl/Cil/Iso/Iso+Cil | t1/2off relaxation(s) of calcium transient    | 0.4/0.3/0.25/0.2   |                               |
|          | ARVM                                                                                                  | Ctrl/Cil/Iso/Iso+Cil | Sarcomere shortening                          | 0.001960784        |                               |
|          | ARVM                                                                                                  | Ctrl/Cil/Iso/Iso+Cil | t1/2off relaxation(s) of sarcomere shortening | 0.5/0.25/0.15/0.1  |                               |
|          | ARVM                                                                                                  | Ctrl/Ro/Iso/Iso+Ro   | Fura2 ratio(% of diastolic ratio)             | 20/20/80/140       |                               |
|          | ARVM                                                                                                  | Ctrl/Ro/Iso/Iso+Ro   | t1/2off relaxation(s) of calcium transient    | 0.4/0.35/0.25/0.25 |                               |
|          | ARVM                                                                                                  | Ctrl/Ro/Iso/Iso+Ro   | Sarcomere                                     | 0.0046296          |                               |

|          |                                                                                                                       |                    |                                               |                   |     |
|----------|-----------------------------------------------------------------------------------------------------------------------|--------------------|-----------------------------------------------|-------------------|-----|
|          |                                                                                                                       |                    | shortening                                    | 3                 |     |
|          | ARVM                                                                                                                  | Ctrl/Ro/Iso/Iso+Ro | t1/2off relaxation(s) of sarcomere shortening | 0.5/0.45/0.15/0.1 |     |
| 15367659 | Protein Kinases C and D Mediate Agonist-Dependent Cardiac Hypertrophy through Nuclear Export of Histone Deacetylase 5 |                    |                                               |                   |     |
|          | NRVM+Ad GFP-HDAC5                                                                                                     | none               | HDAC5 nuclear localization                    | 750               | 2hr |
|          | NRVM+Ad GFP-HDAC5                                                                                                     | PE                 | HDAC5 nuclear localization                    | 150               | 2hr |
|          | NRVM+Ad GFP-HDAC5                                                                                                     | PE+KN93            | HDAC5 nuclear localization                    | 100               | 2hr |
|          | NRVM+Ad GFP-HDAC5                                                                                                     | PE+U1026           | HDAC5 nuclear localization                    | 150               | 2hr |
|          | NRVM+Ad GFP-HDAC5                                                                                                     | PE+HA1077          | HDAC5 nuclear localization                    | 300               | 2hr |
|          | NRVM+Ad GFP-HDAC5                                                                                                     | PE+Y27632          | HDAC5 nuclear localization                    | 200               | 2hr |
|          | NRVM+Ad GFP-HDAC5                                                                                                     | PE+DAGK Inhibitor  | HDAC5 nuclear localization                    | 250               | 2hr |
|          | NRVM+Ad GFP-HDAC5                                                                                                     | PE+Wortmannin      | HDAC5 nuclear localization                    | 20                | 2hr |
|          | NRVM+Ad GFP-HDAC5                                                                                                     | PE+Rapamycin       | HDAC5 nuclear localization                    | 200               | 2hr |
|          | NRVM+Ad GFP-HDAC5                                                                                                     | PE+SB216763        | HDAC5 nuclear localization                    | 10                | 2hr |
|          | NRVM+Ad GFP-HDAC5                                                                                                     | PE+Bis1            | HDAC5 nuclear localization                    | 600               | 2hr |
|          | NRVM+Ad GFP-HDAC5                                                                                                     | PE+Staurosporine   | HDAC5 nuclear localization                    | 1000              | 2hr |
|          | NRVM+Ad GFP-HDAC5                                                                                                     | none               | HDAC5 nuclear localization                    | 330               | 2hr |
|          | NRVM+Ad GFP-HDAC5                                                                                                     | PE                 | HDAC5 nuclear localization                    | 100               | 2hr |

|          |                                                                                                               |                       |                            |      |        |
|----------|---------------------------------------------------------------------------------------------------------------|-----------------------|----------------------------|------|--------|
|          | NRVM+Ad GFP-HDAC5                                                                                             | Bis1 pretx 30min+PE   | HDAC5 nuclear localization | 430  | 2hr    |
|          | NRVM+Ad GFP-HDAC5                                                                                             | ET-1                  | HDAC5 nuclear localization | 110  | 2hr    |
|          | NRVM+Ad GFP-HDAC5                                                                                             | Bis1 pretx 30min+ET-1 | HDAC5 nuclear localization | 115  | 2hr    |
|          | NRVM+Ad GFP-HDAC5                                                                                             | FBS                   | HDAC5 nuclear localization | 130  | 2hr    |
|          | NRVM+Ad GFP-HDAC5                                                                                             | Bis1 pretx 30min+FBS  | HDAC5 nuclear localization | 80   | 2hr    |
| 11715023 | Akt/mTOR pathway is a crucial regulator of skeletal muscle hypertrophy and can prevent muscle atrophy in vivo |                       |                            |      |        |
|          | Rat heart                                                                                                     | clenbuterol           | Heart weight               | 21   | 14days |
|          | Rat heart                                                                                                     | clenbuterol+CsA       | Heart weight               | 1    | 14days |
|          | plantaris muscle lysates from control rats                                                                    | none                  | calcineurin activity       | 47   | 14days |
|          | plantaris muscle lysates from control rats                                                                    | CsA                   | calcineurin activity       | 33   | 14days |
|          | CH                                                                                                            | none                  | calcineurin activity       | 36   | 14days |
|          | CH                                                                                                            | CsA                   | calcineurin activity       | 33   | 14days |
|          | CH                                                                                                            | none                  | Muscle weight              | 37   | 14days |
|          | CH                                                                                                            | CsA                   | Muscle weight              | 36   | 14days |
|          | CH                                                                                                            | none                  | Muscle weight              | 58   | 30days |
|          | CH                                                                                                            | CsA                   | Muscle weight              | 89   | 30days |
|          | Rat plantaris muscle of control                                                                               | none                  | Fibre cross-sectional area | 2100 | 14days |
|          | CH                                                                                                            | none                  | Fibre cross-sectional area | 3300 | 14days |
|          | CH                                                                                                            | CsA                   | Fibre cross-sectional area | 3200 | 14days |
|          | Rat plantaris muscle of control                                                                               | none                  | Fibre cross-sectional area | 1400 | 14days |

|  |                                                                   |       |                            |      |        |
|--|-------------------------------------------------------------------|-------|----------------------------|------|--------|
|  | CH                                                                | none  | Fibre cross-sectional area | 2800 | 14days |
|  | CH                                                                | CsA   | Fibre cross-sectional area | 2600 | 14days |
|  | muscle fibres expressing slow MyHC in plantaris muscle of control | none  | % of total fibre           | 12   | 14days |
|  | CH                                                                | none  | % of total fibre           | 25   | 14days |
|  | CH                                                                | CsA   | % of total fibre           | 24   | 14days |
|  | CH                                                                | FK506 | Muscle weight              | 70   | 7days  |
|  | plantaris of control                                              | none  | GSK-3 $\beta$ activity     | 100  | 14days |
|  | CH                                                                | none  | GSK-3 $\beta$ activity     | 75   | 14days |
|  | CH                                                                | Rap   | GSK-3 $\beta$ activity     | 75   | 14days |
|  | plantaris of control                                              | none  | p70S6K activity            | 100  | 14days |
|  | CH                                                                | none  | p70S6K activity            | 140  | 14days |
|  | CH                                                                | Rap   | p70S6K activity            | 110  | 14days |
|  | CH                                                                | none  | Muscle weight              | 23   | 7days  |
|  | CH                                                                | Rap   | Muscle weight              | 7    | 7days  |
|  | CH                                                                | none  | Muscle weight              | 40   | 14days |
|  | CH                                                                | Rap   | Muscle weight              | 5    | 14days |
|  | muscle fibres in rat plantaris muscle of control                  | none  | Fibre cross-sectional area | 2100 | 14days |
|  | CH                                                                | none  | Fibre cross-sectional area | 3300 | 14days |
|  | CH                                                                | Rap   | Fibre cross-sectional area | 2400 | 14days |
|  | muscle fibres in rat plantaris muscle of control                  | none  | Fibre cross-sectional area | 1300 | 14days |
|  | CH                                                                | none  | Fibre cross-sectional area | 2800 | 14days |
|  | CH                                                                | Rap   | Fibre cross-sectional area | 1800 | 14days |

| Serum Response Factor Mediates AP-1-dependent Induction of the Skeletal $\alpha$ -Actin Promoter in Ventricular Myocytes |                                                                        |            |                                   |      |      |
|--------------------------------------------------------------------------------------------------------------------------|------------------------------------------------------------------------|------------|-----------------------------------|------|------|
| 8631897                                                                                                                  | cardiac myocyte+ $\Delta$ 56Fos                                        | none       | Skeletal $\alpha$ -Actin activity | 1    | 24hr |
|                                                                                                                          | cardiac myocyte+ $\Delta$ 56Fos+Fos 1ug                                | none       | Skeletal $\alpha$ -Actin activity | 1.3  | 24hr |
|                                                                                                                          | cardiac myocyte+ $\Delta$ 56Fos+Fos 5ug                                | none       | Skeletal $\alpha$ -Actin activity | 1.2  | 24hr |
|                                                                                                                          | cardiac myocyte+ $\Delta$ 56Fos+Fos 10ug                               | none       | Skeletal $\alpha$ -Actin activity | 0.5  | 24hr |
|                                                                                                                          | cardiac myocyte+ $\Delta$ 56Fos+Jun 1ug                                | none       | Skeletal $\alpha$ -Actin activity | 1    | 24hr |
|                                                                                                                          | cardiac myocyte+ $\Delta$ 56Fos+Jun 5ug                                | none       | Skeletal $\alpha$ -Actin activity | 1.1  | 24hr |
|                                                                                                                          | cardiac myocyte+ $\Delta$ 56Fos+Jun 10ug                               | none       | Skeletal $\alpha$ -Actin activity | 1.3  | 24hr |
|                                                                                                                          | cardiac myocyte+ $\Delta$ 56Fos+JunB 1ug                               | none       | Skeletal $\alpha$ -Actin activity | 0.4  | 24hr |
|                                                                                                                          | cardiac myocyte+ $\Delta$ 56Fos+JunB 5ug                               | none       | Skeletal $\alpha$ -Actin activity | 0.3  | 24hr |
|                                                                                                                          | cardiac myocyte+ $\Delta$ 56Fos+JunB 10ug                              | none       | Skeletal $\alpha$ -Actin activity | 0.2  | 24hr |
|                                                                                                                          | cardiac myocyte+Jun                                                    | none       | Gal4 activity                     | 0.8  | 24hr |
|                                                                                                                          | cardiac myocyte+Gal4-SRF(256-508)                                      | none       | Gal4 activity                     | 8    | 24hr |
|                                                                                                                          | cardiac myocyte+Gal4-SRF(256-508)+Jun                                  | none       | Gal4 activity                     | 9    | 24hr |
| 24152730                                                                                                                 | Estrogen regulates histone deacetylases to prevent cardiac hypertrophy |            |                                   |      |      |
|                                                                                                                          | NRCM                                                                   | none       | HDAC4 mRNA expression             | 5    | 24hr |
|                                                                                                                          | NRCM                                                                   | Ang II     | HDAC4 mRNA expression             | 1.5  | 24hr |
|                                                                                                                          | NRCM                                                                   | ET-1       | HDAC4 mRNA expression             | 2.5  | 24hr |
| NRCM                                                                                                                     | none                                                                   | HDAC5 mRNA | 7                                 | 24hr |      |

|      |              |                          |            |  |      |
|------|--------------|--------------------------|------------|--|------|
|      |              |                          | expression |  |      |
| NRCM | Ang II       | HDAC5 mRNA expression    | 2          |  | 24hr |
| NRCM | ET-1         | HDAC5 mRNA expression    | 3          |  | 24hr |
| NRCM | none         | HDAC4 protein expression | 12         |  | 24hr |
| NRCM | Ang II       | HDAC4 protein expression | 4          |  | 24hr |
| NRCM | ET-1         | HDAC4 protein expression | 3.8        |  | 24hr |
| NRCM | none         | HDAC5 protein expression | 13         |  | 24hr |
| NRCM | Ang II       | HDAC5 protein expression | 3          |  | 24hr |
| NRCM | ET-1         | HDAC5 protein expression | 3          |  | 24hr |
| NRCM | none         | HDAC4 mRNA expression    | 12         |  | 24hr |
| NRCM | Ang II       | HDAC4 mRNA expression    | 4          |  | 24hr |
| NRCM | none         | HDAC5 mRNA expression    | 8          |  | 24hr |
| NRCM | Ang II       | HDAC5 mRNA expression    | 3          |  | 24hr |
| NRCM | none         | pHDAC4 S632              | 1000       |  | 24hr |
| NRCM | Ang II       | pHDAC4 S632              | 3700       |  | 24hr |
| NRCM | Ang II+BAPTA | pHDAC4 S632              | 1200       |  | 24hr |
| NRCM | BAPTA 5mM    | pHDAC4 S632              | 1400       |  | 24hr |
| NRCM | Ang II+EGTA  | pHDAC4 S632              | 1300       |  | 24hr |
| NRCM | EGTA 3mM     | pHDAC4 S632              | 1500       |  | 24hr |
| NRCM | none         | GAPDH                    | 2.3        |  | 24hr |
| NRCM | Ang II       | GAPDH                    | 2.3        |  | 24hr |

|          |                                                                                                               |               |                                |       |       |
|----------|---------------------------------------------------------------------------------------------------------------|---------------|--------------------------------|-------|-------|
|          | NRCM                                                                                                          | Ang II+E2     | GAPDH                          | 2.4   | 24hr  |
|          | NRCM                                                                                                          | Ang II+DPN    | GAPDH                          | 2     | 24hr  |
|          | NRCM                                                                                                          | E2            | GAPDH                          | 2.3   | 24hr  |
|          | NRCM                                                                                                          | DPN           | GAPDH                          | 2.3   | 24hr  |
|          | NRCM                                                                                                          | none          | HDAC2 mRNA expression          | 1     | 24hr  |
|          | NRCM                                                                                                          | Ang II        | GATA4 transcriptional activity | 2.8*  | 24hr  |
| 18757826 | Shp2 Negatively Regulates Growth in Cardiomyocytes by Controlling Focal Adhesion Kinase/Src and mTOR Pathways |               |                                |       |       |
|          | NRVM                                                                                                          | no stretch    | pFAK                           | 100   | 0min  |
|          | NRVM                                                                                                          | stretch 10min | pFAK                           | 150*  | 10min |
|          | NRVM                                                                                                          | stretch 30min | pFAK                           | 180*  | 30min |
|          | NRVM                                                                                                          | stretch 60min | pFAK                           | 190*  | 60min |
|          | NRVM                                                                                                          | no stretch    | SHP2                           | 100   | 0min  |
|          | NRVM                                                                                                          | stretch 10min | SHP2                           | 15*   | 10min |
|          | NRVM                                                                                                          | stretch 30min | SHP2                           | 50*   | 30min |
|          | NRVM                                                                                                          | stretch 60min | SHP2                           | 35*   | 60min |
|          | NRVM+anti-SHP2                                                                                                | no stretch    | SHP2                           | 100   | 60min |
|          | NRVM+anti-FAK                                                                                                 | no stretch    | SHP2                           | 25*   | 60min |
|          | NRVM+anti-FAK                                                                                                 | stretch 60min | SHP2                           | 15*   | 60min |
|          | NRVM                                                                                                          | no stretch    | pFAK                           | 100   |       |
|          | NRVM+PTP-SHP2                                                                                                 | no stretch    | pFAK                           | 10*   |       |
|          | NRVM                                                                                                          | stretch       | pFAK                           | 160*  |       |
|          | NRVM+PTP-SHP2                                                                                                 | stretch       | pFAK                           | 25*   |       |
|          | NRVM                                                                                                          | no stretch    | pSHP2                          | 100   | 0min  |
|          | NRVM                                                                                                          | stretch 10min | pSHP2                          | 30*   | 10min |
|          | NRVM                                                                                                          | stretch 30min | pSHP2                          | 60*   | 30min |
|          | NRVM                                                                                                          | stretch 60min | pSHP2                          | 50*   | 60min |
|          | NRVM                                                                                                          | no stretch    | pFAK                           | 100   | 0min  |
| NRVM     | stretch 10min                                                                                                 | pFAK          | 45*                            | 10min |       |

|          |                                                                                                                 |               |                                                                    |      |       |
|----------|-----------------------------------------------------------------------------------------------------------------|---------------|--------------------------------------------------------------------|------|-------|
|          | NRVM                                                                                                            | stretch 30min | pFAK                                                               | 65*  | 30min |
|          | NRVM                                                                                                            | stretch 60min | pFAK                                                               | 62*  | 60min |
|          | NRVM                                                                                                            | no stretch    | pSHP2 Tyr542                                                       | 100  | 0min  |
|          | NRVM                                                                                                            | stretch 10min | pSHP2 Tyr542                                                       | 130* | 10min |
|          | NRVM                                                                                                            | stretch 60min | pSHP2 Tyr542                                                       | 180  | 60min |
|          | NRVM                                                                                                            | none          | SHP2                                                               | 100  |       |
|          | NRVM                                                                                                            | Lipofectamine | SHP2                                                               | 120  |       |
|          | NRVM+si-GFP                                                                                                     | none          | SHP2                                                               | 100  |       |
|          | NRVM+si-SHP2                                                                                                    | none          | SHP2                                                               | 10*  |       |
|          | NRVM                                                                                                            | none          | p Anti-SHP2                                                        | 100  |       |
|          | NRVM                                                                                                            | Lipofectamine | p Anti-SHP2                                                        | 85   |       |
|          | Stress-induced activation of protein kinase CK2 by direct interaction with p38 mitogen-activated protein kinase |               |                                                                    |      |       |
| 10747897 | HeLa cell+ CK2                                                                                                  | none          | p38 $\alpha$ -stimulated casein phosphotransferase activity of CK2 | 480  | 30min |
|          | HeLa cell+ CK2+GST-p38                                                                                          | none          | p38 $\alpha$ -stimulated casein phosphotransferase activity of CK2 | 1600 | 30min |
|          | HeLa cell+ CK2+GST-p38                                                                                          | SB203580      | p38 $\alpha$ -stimulated casein phosphotransferase activity of CK2 | 490  | 30min |
|          | HeLa cell+ CK2+GST-p38                                                                                          | DRB           | p38 $\alpha$ -stimulated casein phosphotransferase activity of CK2 | 500  | 30min |



|          |                                                                                                         |                              |                                                                    |                          |                 |
|----------|---------------------------------------------------------------------------------------------------------|------------------------------|--------------------------------------------------------------------|--------------------------|-----------------|
|          | HeLa cell+ CK2+GST-p38                                                                                  | Heparin                      | p38 $\alpha$ -stimulated casein phosphotransferase activity of CK2 | 220                      | 30min           |
|          | HeLa cell+GST-p38                                                                                       | none                         | p38 $\alpha$ -stimulated casein phosphotransferase activity of CK2 | 10                       | 30min           |
| 9814969  | Regulation of angiotensin II-induced JAK2 tyrosine phosphorylation: roles of SHP-1 and SHP-2            |                              |                                                                    |                          |                 |
|          | VSMC+Rabbit IgG                                                                                         | Ang II 0/5/10/30/60min       | pJAK2                                                              | 0.4/2.6/3.1/2.0/0.4      | 0/5/10/30/60min |
|          | VSMC+Anti SHP2 Ab                                                                                       | Ang II 0/5/10/30/60min       | pJAK2                                                              | 0.4/0.4/0.5/0.4/0.4      | 0/5/10/30/60min |
|          | VSMC                                                                                                    | none                         | Cell proliferation                                                 | 0.24/0.28/0.29/0.30/0.28 | 0/7/12/24/48hr  |
|          | VSMC                                                                                                    | Ang II                       | Cell proliferation                                                 | 0.23/0.28/0.50/0.60/0.63 | 0/7/12/24/48hr  |
|          | VSMC+anti SHP2 Ab                                                                                       | Ang II                       | Cell proliferation                                                 | 0.20/0.25/0.30/0.31/0.29 | 0/7/12/24/48hr  |
| 11818507 | Requirement of Ca(2+) and PKCdelta for Janus kinase 2 activation by angiotensin II: involvement of PYK2 |                              |                                                                    |                          |                 |
|          | VSMC                                                                                                    | none                         | pJAK2                                                              | 1                        | 3min            |
|          | VSMC                                                                                                    | Ang II                       | pJAK2                                                              | 4                        | 3min            |
|          | VSMC                                                                                                    | none                         | pJAK2                                                              | 0.2                      | 3min            |
|          | VSMC                                                                                                    | Ang II+GF109203X pretx 30min | pJAK2                                                              | 0.7                      | 3min            |
|          | VSMC                                                                                                    | none                         | pJAK2                                                              | 1                        | 3min            |
|          | VSMC                                                                                                    | Ang II                       | pJAK2                                                              | 5                        | 3min            |
| VSMC     | none                                                                                                    | pJAK2                        | 0.8                                                                | 3min                     |                 |

|          |                                                                                                                                                            |                              |       |                                         |                         |
|----------|------------------------------------------------------------------------------------------------------------------------------------------------------------|------------------------------|-------|-----------------------------------------|-------------------------|
|          | VSMC                                                                                                                                                       | Ang II+Rottle pretx<br>30min | pJAK2 | 1.2                                     | 3min                    |
|          | VSMC                                                                                                                                                       | none                         | pJAK2 | 1                                       | 3min                    |
|          | VSMC                                                                                                                                                       | Ang II                       | pJAK2 | 5                                       | 3min                    |
|          | VSMC                                                                                                                                                       | none                         | pJAK2 | 2                                       | 3min                    |
|          | VSMC                                                                                                                                                       | Ang II+Go6976 pretx<br>30min | pJAK2 | 4                                       | 3min                    |
| 16687399 | Scaffolding Protein Grb2-associated Binder 1 Sustains Epidermal Growth Factor-induced Mitogenic and Survival Signaling by Multiple Positive Feedback Loops |                              |       |                                         |                         |
|          | HEK293                                                                                                                                                     | none                         | pAkt  | 1                                       | 0min                    |
|          | HEK293                                                                                                                                                     | EGF                          | pAkt  | 3                                       | 1min                    |
|          | HEK293                                                                                                                                                     | EGF                          | pAkt  | 2                                       | 5min                    |
|          | HEK293                                                                                                                                                     | EGF                          | pAkt  | 1.5                                     | 10min                   |
|          | HEK293                                                                                                                                                     | wortmannin                   | pAkt  | 0                                       | 0min                    |
|          | HEK293                                                                                                                                                     | EGF+wortmannin               | pAkt  | 0                                       | 1min                    |
|          | HEK293                                                                                                                                                     | EGF+wortmannin               | pAkt  | 0                                       | 5min                    |
|          | HEK293                                                                                                                                                     | EGF+wortmannin               | pAkt  | 0                                       | 10min                   |
|          | HEK293                                                                                                                                                     | EGF                          | ppERK | 0/1.5/7.0/6<br>.0/4.5/2.0               | 0/1/3/5/10/30min        |
|          | HEK293                                                                                                                                                     | EGF+wortmannin               | ppERK | 0/0/0.8/1.5<br>/1.2/0.3                 | 0/1/3/5/10/30min        |
|          | HEK293                                                                                                                                                     | none                         | pEGFR | 1                                       | 0min                    |
|          | HEK293                                                                                                                                                     | EGF                          | pEGFR | 3                                       | 1min                    |
|          | HEK293                                                                                                                                                     | EGF                          | pEGFR | 2                                       | 5min                    |
|          | HEK293                                                                                                                                                     | EGF                          | pEGFR | 1.5                                     | 10min                   |
|          | HEK293                                                                                                                                                     | wortmannin                   | pEGFR | 1                                       | 0min                    |
|          | HEK293                                                                                                                                                     | EGF+wortmannin               | pEGFR | 3.5                                     | 1min                    |
|          | HEK293                                                                                                                                                     | EGF+wortmannin               | pEGFR | 2                                       | 5min                    |
|          | HEK293                                                                                                                                                     | EGF+wortmannin               | pEGFR | 1.5                                     | 10min                   |
|          | HEK293                                                                                                                                                     | EGF                          | ppERK | 0/0/0.45/0.<br>6/0.75/1.2/<br>0.9/ 0.28 | 0/1/3/4/5/7/10/15/30min |

|        |                |                  |                              |       |                         |
|--------|----------------|------------------|------------------------------|-------|-------------------------|
|        |                |                  |                              | /0.23 |                         |
| HEK293 | EGF+wortmannin | ppERK            | 0/0/0/0/0/0.05/0.3/0.05/0.05 |       | 0/1/3/4/5/7/10/15/30min |
| HEK293 | none           | pAkt             | 1                            |       | 0min                    |
| HEK293 | EGF            | pAkt             | 2                            |       | 5min                    |
| HEK293 | U0126          | pAkt             | 3                            |       | 0min                    |
| HEK293 | U0126+EGF      | pAkt             | 4                            |       | 5min                    |
| HEK293 | IT-5           | pAkt             | 2                            |       | 0min                    |
| HEK293 | IT-5+EGF       | pAkt             | 3.5                          |       | 5min                    |
| HEK293 | EGF            | pAkt             | 1.0/1.3/2.5/2.2/1/0.8        |       | 0/1/3/5/10/30min        |
| HEK293 | EGF+IT-5       | pAkt             | 2.0/3.0/5.0/5.0/4.5/3.0      |       | 0/1/3/5/10/30min        |
| HEK293 | none           | pGab1            | 0.1                          |       | 0min                    |
| HEK293 | EGF            | pGab1            | 5                            |       | 5min                    |
| HEK293 | IT-5           | pGab1            | 0.1                          |       | 0min                    |
| HEK293 | IT-5+EGF       | pGab1            | 8                            |       | 5min                    |
| HEK293 | U0126          | pGab1            | 0.1                          |       | 0min                    |
| HEK293 | U0126+EGF      | pGab1            | 10                           |       | 5min                    |
| HEK293 | none           | pGab1            | 0/280/170/120/90/70/50/25    |       | 0/2/5/10/15/20/25/30min |
| HEK293 | wortmannin     | pGab1            | 0/150/30/25/25/25/25         |       | 0/2/5/10/15/20/25/30min |
| HEK293 | none           | Gab-SHP2 complex | 0/43/23/10/8/5/3/1           |       | 0/2/5/10/15/20/25/30min |
| HEK293 | wortmannin     | Gab-SHP2 complex | 0/18/2/1/1/1/1/1             |       | 0/2/5/10/15/20/25/30min |

|          |                                                                                                                                            |                       |                           |                                |                         |
|----------|--------------------------------------------------------------------------------------------------------------------------------------------|-----------------------|---------------------------|--------------------------------|-------------------------|
|          | HEK293                                                                                                                                     | none                  | ppERK                     | 0/70/75/50<br>/42/40/35/<br>20 | 0/2/5/10/15/20/25/30min |
|          | HEK293+Gab1ΔSHP2                                                                                                                           | none                  | ppERK                     | 0/60/45/20<br>/20/20/20/<br>20 | 0/2/5/10/15/20/25/30min |
| 19713680 | Angiotensin II induces cardiomyocyte hypertrophy probably through histone deacetylases                                                     |                       |                           |                                |                         |
|          | NRCM                                                                                                                                       | none                  | HDAC2 mRNA                | 0.12                           | 12hr                    |
|          | NRCM                                                                                                                                       | Ang II                | HDAC2 mRNA                | 0.35                           | 12hr                    |
|          | NRCM                                                                                                                                       | Ang II+VPA            | HDAC2 mRNA                | 0.23                           | 12hr                    |
|          | NRCM                                                                                                                                       | none                  | β-MHC mRNA                | 0.16                           | 12hr                    |
|          | NRCM                                                                                                                                       | Ang II                | β-MHC mRNA                | 0.36                           | 12hr                    |
|          | NRCM                                                                                                                                       | Ang II+VPA            | β-MHC mRNA                | 0.24                           | 12hr                    |
|          | NRCM                                                                                                                                       | none                  | % of HDAC2<br>positive CM | 1.25                           | 12hr                    |
|          | NRCM                                                                                                                                       | Ang II                | % of HDAC2<br>positive CM | 2.2                            | 12hr                    |
|          | NRCM                                                                                                                                       | Ang II+VPA            | % of HDAC2<br>positive CM | 1.6                            | 12hr                    |
|          | NRCM                                                                                                                                       | none                  | % of c-fos<br>positive CM | 1.2                            | 12hr                    |
|          | NRCM                                                                                                                                       | Ang II                | % of c-fos<br>positive CM | 2.4                            | 12hr                    |
|          | NRCM                                                                                                                                       | Ang II+VPA            | % of c-fos<br>positive CM | 1.6                            | 12hr                    |
|          | NRCM                                                                                                                                       | none                  | Surface area of<br>CM     | 40                             | 12hr                    |
|          | NRCM                                                                                                                                       | Ang II                | Surface area of<br>CM     | 110                            | 12hr                    |
| NRCM     | Ang II+VPA                                                                                                                                 | Surface area of<br>CM | 85                        | 12hr                           |                         |
| 8526802  | Protein tyrosine phosphorylation induced by epidermal growth factor and insulin-like growth factor-1 in a rat clonal dental pulp-cell line |                       |                           |                                |                         |

|            |                                                                                                                  |                           |                 |                                  |                    |
|------------|------------------------------------------------------------------------------------------------------------------|---------------------------|-----------------|----------------------------------|--------------------|
|            | RDP 4-1cells                                                                                                     | none                      | proliferation   | 0.45                             | 48h                |
|            | RDP 4-1cells                                                                                                     | EGF 0.1ng/ml              | proliferation   | 0.485                            | 48h                |
|            | RDP 4-1cells                                                                                                     | EGF 1ng/ml                | proliferation   | 0.53                             | 48h                |
|            | RDP 4-1cells                                                                                                     | EGF 10ng/ml               | proliferation   | 0.565                            | 48h                |
|            | RDP 4-1cells                                                                                                     | EGF 100ng/ml              | proliferation   | 0.575                            | 48h                |
|            | RDP 4-1cells                                                                                                     | none                      | proliferation   | 0.45                             | 48h                |
|            | RDP 4-1cells                                                                                                     | IGF-1 0.1ng/ml            | proliferation   | 0.452                            | 48h                |
|            | RDP 4-1cells                                                                                                     | IGF-1 1ng/ml              | proliferation   | 0.465                            | 48h                |
|            | RDP 4-1cells                                                                                                     | IGF-1 10ng/ml             | proliferation   | 0.515                            | 48h                |
|            | RDP 4-1cells                                                                                                     | IGF-1 100ng/ml            | proliferation   | 0.527                            | 48h                |
| 2472219    | PLC-gamma is a substrate for the PDGF and EGF receptor protein-tyrosine kinases in vivo and in vitro             |                           |                 |                                  |                    |
|            | NIH 3T3 cells                                                                                                    | none                      | pPLBbeta1       | 1                                | 5min               |
|            | NIH 3T3 cells                                                                                                    | PDGF(2nM)                 | pPLBbeta1       | 1.1                              | 5min               |
|            | NIH 3T3 cells                                                                                                    | none                      | pPLCgamma       | 1                                | 5min               |
|            | NIH 3T3 cells                                                                                                    | PDGF(2nM)                 | pPLCgamma       | 9                                | 5min               |
|            | NIH 3T3 cells                                                                                                    | none                      | pPLCdelta       | 1                                | 5min               |
|            | NIH 3T3 cells                                                                                                    | PDGF(2nM)                 | pPLCdelta       | 1                                | 5min               |
|            | NIH 3T3 cells                                                                                                    | none                      | pPLCgamma       | 1                                | 15min              |
|            | NIH 3T3 cells                                                                                                    | EGF(rp-saturating amount) | pPLCgamma       | 1.45                             | 15min              |
|            | NIH 3T3 cells                                                                                                    | PDGF(2nM)                 | pPLCgamma       | 10/20/30/4<br>2/58/100/8<br>0/50 | 0/2/4/6/8/10/30/60 |
|            | Swiss 3T3 cells                                                                                                  | PDGFR                     | pPLCgamma       | positive                         |                    |
| A431 cells | EGFR                                                                                                             | pPLCgamma                 | positive        |                                  |                    |
| 10559227   | ErbB2 and ErbB3 receptors mediate inhibition of calcium-dependent chloride secretion in colonic epithelial cells |                           |                 |                                  |                    |
|            | T84 cells+CCh                                                                                                    | none                      | Isc(microA/cm2) | 33                               | 20min              |
|            | T84 cells+CCh                                                                                                    | EGF                       | Isc(microA/cm2) | 15                               | 20min              |
|            | T84 cells                                                                                                        | EGF                       | p-EGFR          | 12.5                             | control            |
|            | T84 cells                                                                                                        | EGF                       | p-EGFR          | 190                              | 1min               |
|            | T84 cells                                                                                                        | EGF                       | p-EGFR          | 195                              | 5min               |

|          |                                                                                                                                                  |               |                    |               |             |
|----------|--------------------------------------------------------------------------------------------------------------------------------------------------|---------------|--------------------|---------------|-------------|
|          | T84 cells                                                                                                                                        | EGF           | p-EGFR             | 208           | 15min       |
|          | T84 cells                                                                                                                                        | EGF           | p-ErbB2            | 10            | control     |
|          | T84 cells                                                                                                                                        | EGF           | p-ErbB2            | 108           | 1min        |
|          | T84 cells                                                                                                                                        | EGF           | p-ErbB2            | 106           | 5min        |
|          | T84 cells                                                                                                                                        | EGF           | p-ErbB2            | 114           | 15min       |
|          | T84 cells                                                                                                                                        | EGF           | p-ErbB3            | 3             | control     |
|          | T84 cells                                                                                                                                        | EGF           | p-ErbB3            | 9             | 1min        |
|          | T84 cells                                                                                                                                        | EGF           | p-ErbB3            | 3             | 5min        |
|          | T84 cells                                                                                                                                        | EGF           | p-ErbB3            | 7             | 15min       |
|          | T84 cells                                                                                                                                        | EGF(100ng/ml) | ErbB2+EGFR         | 0/1/0.7/0.7   | 0/1/5/15min |
|          | T84 cells                                                                                                                                        | EGF           | PI3K+EGFR          | 0.1/1/0.8/0.6 | 0/1/5/15min |
|          | T84 cells                                                                                                                                        | EGF           | PI3K+ErbB2         | 0/0/0/0       | 0/1/5/15min |
|          | A JNK-independent signaling pathway regulates TNF alpha-stimulated, c-Jun-Driven FRA-1 protooncogene transcription in pulmonary epithelial cells |               |                    |               |             |
|          | pulmonary epithelial cells                                                                                                                       | TNFa          | p-JNK1(activation) | 0             | 0min        |
|          | pulmonary epithelial cells                                                                                                                       | TNFa          | p-JNK1(activation) | 1             | 15min       |
|          | pulmonary epithelial cells                                                                                                                       | TNFa          | p-JNK1(activation) | 1.5           | 30min       |
|          | pulmonary epithelial cells                                                                                                                       | TNFa          | p-JNK1(activation) | 1.7           | 60min       |
| 17082637 | pulmonary epithelial cells                                                                                                                       | TNFa          | p-c-JUN/c-JUN      | 0             | 0min        |
|          | pulmonary epithelial cells                                                                                                                       | TNFa          | p-c-JUN/c-JUN      | 0.3           | 15min       |
|          | pulmonary epithelial cells                                                                                                                       | TNFa          | p-c-JUN/c-JUN      | 0.4           | 30min       |
|          | pulmonary epithelial cells                                                                                                                       | TNFa          | p-c-JUN/c-JUN      | 0.5           | 60min       |
|          | pulmonary epithelial cells                                                                                                                       | TNFa          | p-c-JUN/c-JUN      | 1.2           | 120min      |
|          | pulmonary epithelial cells                                                                                                                       | TNFa          | p-CREB             | 1.5           | 15min       |
|          | pulmonary epithelial cells                                                                                                                       | TNFa          | p-CREB             | 2.7           | 30min       |
|          | pulmonary epithelial cells                                                                                                                       | TNFa          | p-ATF1             | 1             | 0min        |
|          | pulmonary epithelial cells                                                                                                                       | TNFa          | p-ATF1             | 2.7*          | 15min       |

|          |                                                                                                                                                        |          |               |     |       |
|----------|--------------------------------------------------------------------------------------------------------------------------------------------------------|----------|---------------|-----|-------|
|          | pulmonary epithelial cells                                                                                                                             | TNFa     | p-ATF1        | 1.2 | 30min |
|          | pulmonary epithelial cells + DMSO                                                                                                                      | TNFa     | p-Elk-1/Elk-1 | 1   | 30min |
|          | pulmonary epithelial cells + PD98059                                                                                                                   | TNFa     | p-Elk-1/Elk-1 | 0.5 | 30min |
|          | pulmonary epithelial cells + DMSO                                                                                                                      | TNFa     | p-CREB        | 1.7 | 30min |
|          | pulmonary epithelial cells + PD98059                                                                                                                   | TNFa     | p-CREB        | 0.9 | 30min |
|          | pulmonary epithelial cells + DMSO                                                                                                                      | TNFa     | p-ATF1        | 1.1 | 30min |
|          | pulmonary epithelial cells + PD98059                                                                                                                   | TNFa     | p-ATF1        | 0.5 | 30min |
| 11585926 | The transcription factor GATA-4 is activated by extracellular signal-regulated kinase1- and 2-Mediated phosphorylation of serine 105 in cardiomyocytes |          |               |     |       |
|          | cardiomyocytes + Ad beta gal TF                                                                                                                        | PE(10uM) | p-GATA4/GATA4 | 1   | 0hr   |
|          | cardiomyocytes + Ad beta gal TF                                                                                                                        | PE(10uM) | p-GATA4/GATA4 | 2   | 1hr   |
|          | cardiomyocytes + Ad beta gal TF                                                                                                                        | PE(10uM) | p-GATA4/GATA4 | 2   | 3hr   |
|          | cardiomyocytes + Ad beta gal TF                                                                                                                        | PE(10uM) | p-GATA4/GATA4 | 2.5 | 24hr  |
|          | cardiomyocytes + Ad GATA4 TF                                                                                                                           | PE(10uM) | p-GATA4/GATA4 | 3.5 | 0hr   |
|          | cardiomyocytes + Ad GATA4 TF                                                                                                                           | PE(10uM) | p-GATA4/GATA4 | 5   | 1hr   |
|          | cardiomyocytes + Ad GATA4 TF                                                                                                                           | PE(10uM) | p-GATA4/GATA4 | 8   | 3hr   |
|          | cardiomyocytes + Ad GATA4 TF                                                                                                                           | PE(10uM) | p-GATA4/GATA4 | 10  | 24hr  |
|          | NRVM                                                                                                                                                   | Saline   | p-GATA4/GATA4 | 1   | 3hr   |
|          | NRVM                                                                                                                                                   | PE       | p-            | 3   | 3hr   |

|                                                         |                                                                                |              |                       |      |                    |
|---------------------------------------------------------|--------------------------------------------------------------------------------|--------------|-----------------------|------|--------------------|
|                                                         |                                                                                |              | GATA4/GATA4           |      |                    |
|                                                         | NRVM + Ad beta-gal TF                                                          | none         | p-GATA4/GATA4         | 1    | 24h                |
|                                                         | NRVM + Ad MEK1 TF                                                              | none         | p-GATA4/GATA4         | 5    | 24h                |
|                                                         | NRVM + Ad MKK7 TF                                                              | none         | p-GATA4/GATA4         | 2    | 24h                |
|                                                         | NRVM + Ad MKK6 TF                                                              | none         | p-GATA4/GATA4         | 3    | 24h                |
|                                                         | NRVM                                                                           | beta-gal     | p-GATA4 fold increase | 1    | 0hr                |
|                                                         | NRVM                                                                           | beta-gal +PE | p-GATA4 fold increase | 3.3  | 3hr                |
|                                                         | NRVM                                                                           | dnMEK1+PE    | p-GATA4 fold increase | 0.75 | 3hr                |
|                                                         | NRVM                                                                           | dnMKK4+PE    | p-GATA4 fold increase | 2.78 | 3hr                |
|                                                         | NRVM                                                                           | dnMKK3+PE    | p-GATA4 fold increase | 3.5  | 3hr                |
|                                                         | NRVM+MBP                                                                       | none         | p-GATA4               | 0    | 20min              |
|                                                         | NRVM                                                                           | beta-gal     | ANF                   | 17   | 2h TF + 24h medium |
|                                                         | NRVM                                                                           | MEK1         | ANF                   | 64   | 2h TF + 24h medium |
|                                                         | NRVM                                                                           | MEK1+Engr    | ANF                   | 62   | 2h TF + 24h medium |
|                                                         | NRVM                                                                           | MEK1+G4-Engr | ANF                   | 30.5 | 2h TF + 24h medium |
|                                                         | NRVM                                                                           | MKK7         | ANF                   | 67   | 2h TF + 24h medium |
|                                                         | NRVM                                                                           | MKK7+Engr    | ANF                   | 62.5 | 2h TF + 24h medium |
|                                                         | NRVM                                                                           | MKK7+G4-Engr | ANF                   | 64   | 2h TF + 24h medium |
| 10788473<br>Ad CnA : A replication-deficient adenovirus | Calcineurin Promotes PKC and c-JUN NH2-terminal Kinase Activation in the heart |              |                       |      |                    |
|                                                         | None TG mice                                                                   | none         | p-JNK(p54)            | 1    | 14 day mice        |
|                                                         | Calcineurin TG mice                                                            | none         | p-JNK(p54)            | 1.7  | 14 day mice        |
|                                                         | None TG mice                                                                   | none         | p-JNK(p54)            | 1    | 25 day mice        |
|                                                         | Calcineurin TG mice                                                            | none         | p-JNK(p54)            | 1.7  | 25 day mice        |



|                                                   |                                    |                     |                        |             |             |
|---------------------------------------------------|------------------------------------|---------------------|------------------------|-------------|-------------|
| expressing a constitutively activated form of CaN | None TG mice                       | none                | p-p38                  | 1           | 14 day mice |
|                                                   | Calcineurin TG mice                | none                | p-p38                  | 0.8         | 14 day mice |
|                                                   | None TG mice                       | none                | p-p38                  | 1           | 25 day mice |
|                                                   | Calcineurin TG mice                | none                | p-p38                  | 0.9         | 25 day mice |
|                                                   | None TG mice                       | none                | p-ERK1/2               | 1           | 14 day mice |
|                                                   | Calcineurin TG mice                | none                | p-ERK1/2               | 2           | 14 day mice |
|                                                   | None TG mice                       | none                | p-ERK1/2               | 1           | 25 day mice |
|                                                   | Calcineurin TG mice                | none                | p-ERK1/2               | 2           | 25 day mice |
|                                                   | None TG mice                       | none                | JNK activity           | 1           | 24hr        |
|                                                   | Calcineurin TG mice                | none                | JNK activity           | 1.7         | 24hr        |
|                                                   | None TG mice                       | none                | ERK 1/2 activity       | 1           | 24hr        |
|                                                   | Calcineurin TG mice                | none                | ERK 1/2 activity       | 1.9         | 24hr        |
|                                                   | Calcineurin TG mice / None TG mice | none                | PKC activity           | 1.4         | 4 day       |
|                                                   | Calcineurin TG mice / None TG mice | none                | PKC activity           | 2           | 8 day       |
|                                                   | Calcineurin TG mice / None TG mice | none                | PKC activity           | 2.4         | 14 day      |
|                                                   | Calcineurin TG mice / None TG mice | none                | PKC activity           | 1.4         | 25 day      |
|                                                   | None TG mice                       | none                | PKC alpha particulate  | 0.451612903 | 24hr        |
|                                                   | Calcineurin TG mice                | none                | PKC alpha particulate  | 0.694444444 | 24hr        |
|                                                   | None TG mice                       | none                | PKC beta-1 particulate | 0.751879699 | 24hr        |
|                                                   | Calcineurin TG mice                | none                | PKC beta-1 particulate | 0.862068966 | 24hr        |
|                                                   | None TG mice                       | none                | PKC epsilon cytosol    | 1.173913043 | 24hr        |
| Calcineurin TG mice                               | none                               | PKC epsilon cytosol | 0.811111111            | 24hr        |             |
| None TG mice                                      | none                               | PKC theta           | 0.75                   | 24hr        |             |

|          |                                                                                    |                     |                    |             |      |
|----------|------------------------------------------------------------------------------------|---------------------|--------------------|-------------|------|
|          |                                                                                    |                     | cytosol            |             |      |
|          | Calcineurin TG mice                                                                | none                | PKC theta cytosol  | 1.6         | 24hr |
|          | None TG mice                                                                       | none                | PKC beta-2 cytosol | 0.866666667 | 24hr |
|          | Calcineurin TG mice                                                                | none                | PKC beta-2 cytosol | 2           | 24hr |
|          | None TG mice                                                                       | none                | PKC lambda cytosol | 4           | 24hr |
|          | Calcineurin TG mice                                                                | none                | PKC lambda cytosol | 0.923076923 | 24hr |
|          | Cardiomyocyte + Ad beta gal TF                                                     | none                | CellArea(um2)      | 1250        | 24hr |
|          | Cardiomyocyte + Ad CnA TF                                                          | none                | CellArea(um2)      | 2200        | 24hr |
|          | Cardiomyocyte + Ad CnA TF                                                          | Chelerythrine 2.5uM | CellArea(um2)      | 1300        | 24hr |
|          | Cardiomyocyte + Ad CnA TF                                                          | PMA 1uM             | CellArea(um2)      | 1400        | 24hr |
|          | Cardiomyocyte + Ad CnA TF                                                          | PD098059 25uM       | CellArea(um2)      | 2000        | 24hr |
|          | Cardiomyocyte + Ad CnA TF                                                          | SB202190 20uM       | CellArea(um2)      | 2100        | 24hr |
|          | Cardiomyocyte + Ad CnA TF                                                          | BDM 7mM             | CellArea(um2)      | 2000        | 24hr |
|          | Cardiomyocyte + Ad CnA TF                                                          | BAPTA 2.5uM         | CellArea(um2)      | 1080        | 24hr |
|          | Big mitogen-activated kinase regulates multiple members of the mef2 protein family |                     |                    |             |      |
|          | in vitro protein kinase assay                                                      | BMK1                | pMEF2A             | positive    | 1hr  |
|          | in vitro protein kinase assay                                                      | BMK1                | pMEF2B             | neutral     | 1hr  |
|          | in vitro protein kinase assay                                                      | BMK1                | pMEF2C             | positive    | 1hr  |
|          | in vitro protein kinase assay                                                      | BMK1                | pMEF2D             | positive    | 1hr  |
|          | in vitro protein kinase assay                                                      | BMK1                | MBP                | neutral     | 1hr  |
|          | in vitro protein kinase assay                                                      | BMK1                | c-jun              | neutral     | 1hr  |
|          | HeLa                                                                               | None                | control            | 1           | 48hr |
|          | HeLa                                                                               | MEK5D+BMK1          | control            | 0.8         | 48hr |
|          | HeLa                                                                               | None                | MEF2A              | 1.5         | 48hr |
|          | HeLa                                                                               | MEK5D+BMK1          | MEF2A              | 21.5        | 48hr |
|          | HeLa                                                                               | None                | MEF2B              | 0.5         | 48hr |
| 10849446 |                                                                                    |                     |                    |             |      |

|                       |            |         |      |      |
|-----------------------|------------|---------|------|------|
| HeLa                  | MEK5D+BMK1 | MEF2B   | 0.3  | 48hr |
| HeLa                  | None       | MEF2C   | 1    | 48hr |
| HeLa                  | MEK5D+BMK1 | MEF2C   | 19   | 48hr |
| HeLa                  | None       | MEF2D   | 1.5  | 48hr |
| HeLa                  | MEK5D+BMK1 | MEF2D   | 26.5 | 48hr |
| Chinese hamster ovary | None       | control | 1    | 48hr |
| Chinese hamster ovary | MEK5D+BMK1 | control | 0.8  | 48hr |
| Chinese hamster ovary | None       | MEF2A   | 1.5  | 48hr |
| Chinese hamster ovary | MEK5D+BMK1 | MEF2A   | 25   | 48hr |
| Chinese hamster ovary | None       | MEF2B   | 0.7  | 48hr |
| Chinese hamster ovary | MEK5D+BMK1 | MEF2B   | 0.8  | 48hr |
| Chinese hamster ovary | None       | MEF2C   | 1.5  | 48hr |
| Chinese hamster ovary | MEK5D+BMK1 | MEF2C   | 32   | 48hr |
| Chinese hamster ovary | None       | MEF2D   | 0.9  | 48hr |
| Chinese hamster ovary | MEK5D+BMK1 | MEF2D   | 38   | 48hr |
| 293                   | None       | control | 1    | 48hr |
| 293                   | MEK5D+BMK1 | control | 1    | 48hr |
| 293                   | None       | MEF2A   | 1    | 48hr |
| 293                   | MEK5D+BMK1 | MEF2A   | 190  | 48hr |
| 293                   | None       | MEF2B   | 1    | 48hr |
| 293                   | MEK5D+BMK1 | MEF2B   | 5    | 48hr |
| 293                   | None       | MEF2C   | 1    | 48hr |
| 293                   | MEK5D+BMK1 | MEF2C   | 175  | 48hr |
| 293                   | None       | MEF2D   | 1    | 48hr |
| 293                   | MEK5D+BMK1 | MEF2D   | 120  | 48hr |
| PC12                  | None       | control | 1    | 48hr |
| PC12                  | MEK5D+BMK1 | control | 0.8  | 48hr |
| PC12                  | None       | MEF2A   | 1.2  | 48hr |
| PC12                  | MEK5D+BMK1 | MEF2A   | 4.4  | 48hr |
| PC12                  | None       | MEF2B   | 1.2  | 48hr |

|                                                                    |            |         |      |       |
|--------------------------------------------------------------------|------------|---------|------|-------|
| PC12                                                               | MEK5D+BMK1 | MEF2B   | 0.6  | 48hr  |
| PC12                                                               | None       | MEF2C   | 1.3  | 48hr  |
| PC12                                                               | MEK5D+BMK1 | MEF2C   | 6    | 48hr  |
| PC12                                                               | None       | MEF2D   | 1.5  | 48hr  |
| PC12                                                               | MEK5D+BMK1 | MEF2D   | 4.8  | 48hr  |
| HeLa cells                                                         | none       | control | 1    | 6hr   |
| HeLa cells                                                         | EGF        | control | 1.15 | 6hr   |
| HeLa cells                                                         | none       | MEF2A   | 1.2  | 6hr   |
| HeLa cells                                                         | EGF        | MEF2A   | 3.7  | 6hr   |
| HeLa cells + ERK2 (0.2ug)<br>inactive TF                           | none       | MEF2D   | 100  | 20min |
| HeLa cells + ERK2 (0.3ug)<br>inactive TF                           | none       | MEF2D   | 80   | 20min |
| HeLa cells                                                         | none       | MEF2D   | 100  | 20min |
| HeLa cells + p38 (0.1ug)<br>inactive TF                            | none       | MEF2D   | 115  | 20min |
| HeLa cells + p38 (0.2ug)<br>inactive TF                            | none       | MEF2D   | 110  | 20min |
| HeLa cells + p38 (0.3ug)<br>inactive TF                            | none       | MEF2D   | 97   | 20min |
| BMK1 phosphorylates MEF2A at amino acids Ser-355, Thr-312, Thr-319 |            |         |      |       |
| HeLa+pG5E1bLuc+pcDNA3                                              | None       | MEF2A   | 1    | 24h   |
| HeLa+pG5E1bLuc+pcDNA3                                              | MEK5D+BMK1 | MEF2A   | 0.8  | 24h   |
| HeLa+pG5E1bLuc+wt                                                  | None       | MEF2A   | 1.2  | 24h   |
| HeLa+pG5E1bLuc+wt                                                  | MEK5D+BMK1 | MEF2A   | 21   | 24h   |
| HeLa+pG5E1bLuc+MEF2A(<br>S355A)                                    | None       | MEF2A   | 0.5  | 24h   |
| HeLa+pG5E1bLuc+MEF2A(<br>S355A)                                    | MEK5D+BMK1 | MEF2A   | 11   | 24h   |
| HeLa+pG5E1bLuc+MEF2A(<br>T312A,T319A)                              | None       | MEF2A   | 0.8  | 24h   |
| HeLa+pG5E1bLuc+MEF2A(<br>T312A,T319A)                              | MEK5D+BMK1 | MEF2A   | 8.5  | 24h   |

|  |                                         |            |       |      |       |
|--|-----------------------------------------|------------|-------|------|-------|
|  | T312A,T319A)                            |            |       |      |       |
|  | HeLa+pG5ElbLuc+MEF2A(S355A/T312A,T319A) | None       | MEF2A | 1    | 24h   |
|  | HeLa+pG5ElbLuc+MEF2A(S355A/T312A,T319A) | MEK5D+BMK1 | MEF2A | 1.8  | 24h   |
|  | HeLa+pG5ElbLuc+pcDNA3                   | None       | MEF2A | 1    | 20min |
|  | HeLa+pG5ElbLuc+pcDNA3                   | EGF        | MEF2A | 1    | 20min |
|  | HeLa+pG5ElbLuc+wt                       | None       | MEF2A | 0.8  | 20min |
|  | HeLa+pG5ElbLuc+wt                       | EGF        | MEF2A | 2.6  | 20min |
|  | HeLa+pG5ElbLuc+MEF2A(S355A)             | None       | MEF2A | 0.75 | 20min |
|  | HeLa+pG5ElbLuc+MEF2A(S355A)             | EGF        | MEF2A | 1.3  | 20min |
|  | HeLa+pG5ElbLuc+MEF2A(T312A,T319A)       | None       | MEF2A | 0.9  | 20min |
|  | HeLa+pG5ElbLuc+MEF2A(T312A,T319A)       | EGF        | MEF2A | 1.4  | 20min |
|  | HeLa+pG5ElbLuc+MEF2A(S355A/T312A,T319A) | None       | MEF2A | 0.6  | 20min |
|  | HeLa+pG5ElbLuc+MEF2A(S355A/T312A,T319A) | EGF        | MEF2A | 0.5  | 20min |
|  | HeLa+pG5ElbLuc+pcDNA3                   | None       | MEF2D | 1    | 24h   |
|  | HeLa+pG5ElbLuc+pcDNA3                   | MEK5D+BMK1 | MEF2D | 1.2  | 24h   |
|  | HeLa+pG5ElbLuc+wt                       | None       | MEF2D | 1.1  | 24h   |
|  | HeLa+pG5ElbLuc+wt                       | MEK5D+BMK1 | MEF2D | 26.5 | 24h   |
|  | HeLa+pG5ElbLuc+MEF2D(S179A)             | None       | MEF2D | 0.9  | 24h   |
|  | HeLa+pG5ElbLuc+MEF2D(S179A)             | MEK5D+BMK1 | MEF2D | 0.5  | 24h   |
|  | HeLa+pG5ElbLuc+MEF2D(S430A)             | None       | MEF2D | 1.5  | 24h   |
|  | HeLa+pG5ElbLuc+MEF2D(S430A)             | MEK5D+BMK1 | MEF2D | 28.5 | 24h   |

|         |                                                                                 |                         |                             |      |       |
|---------|---------------------------------------------------------------------------------|-------------------------|-----------------------------|------|-------|
|         | HeLa+pG5ElbLuc+pcDNA3                                                           | None                    | MEF2D                       | 1    | 20min |
|         | HeLa+pG5ElbLuc+pcDNA3                                                           | EGF                     | MEF2D                       | 0.8  | 20min |
| 9075635 | Endothelin-1 is a potent regulator of human bone cell metabolism                |                         |                             |      |       |
|         | osteoblastic cells+ETRAnt(10ng/ml)                                              | None                    | Cell number(%)              | 75   | 24h   |
|         | osteoblastic cells+ETRAnt(10ng/ml)                                              | Endothelin-1 1pg/ml     | Cell number(%)              | 87.5 | 24h   |
|         | osteoblastic cells+ETRAnt(10ng/ml)                                              | Endothelin-1 10pg/ml    | Cell number(%)              | 120  | 24h   |
|         | osteoblastic cells+ETRAnt(10ng/ml)                                              | Endothelin-1 100pg/ml   | Cell number(%)              | 100  | 24h   |
|         | osteoblastic cells+ETRAnt(10ng/ml)                                              | Endothelin-1 1000pg/ml  | Cell number(%)              | 130  | 24h   |
|         | osteoblastic cells+ETRAnt(10ng/ml)                                              | Endothelin-1 10000pg/ml | Cell number(%)              | 165  | 24h   |
|         | osteoblastic cells                                                              | Endothelin-1 1pg/ml     | Cell number(%)              | 125  | 24h   |
|         | osteoblastic cells                                                              | Endothelin-1 10pg/ml    | Cell number(%)              | 167  | 24h   |
|         | osteoblastic cells                                                              | Endothelin-1 100pg/ml   | Cell number(%)              | 243  | 24h   |
|         | osteoblastic cells                                                              | Endothelin-1 1000pg/ml  | Cell number(%)              | 267  | 24h   |
|         | osteoblastic cells                                                              | Endothelin-1 10000pg/ml | Cell number(%)              | 320  | 24h   |
| 9223382 | A paracrine Role for myoepithelial cell-derived FGF2 in the normal human breast |                         |                             |      |       |
|         | Breast epithelial cells(BCM)                                                    | none                    | prolif of Breast ep cell    | 0.08 | 6 day |
|         | Breast epithelial cells(BCM)+1%FCS                                              | none                    | prolif of Breast ep cell    | 0.06 | 6 day |
|         | Breast epithelial cells(BCM)+2%FCS                                              | none                    | prolif of Breast ep cell    | 0.07 | 6 day |
|         | Breast epithelial cells(BCM)+5%FCS                                              | none                    | prolif of Breast ep cell    | 0.09 | 6 day |
|         | Breast epithelial cells(BCM)+10%FCS                                             | none                    | prolif of Breast myoep cell | 0.45 | 6 day |

|          |                                                                                       |                 |                             |        |        |
|----------|---------------------------------------------------------------------------------------|-----------------|-----------------------------|--------|--------|
|          | Breast epithelial cells(BCM)                                                          | FGF2(10ng/ml)   | prolif of Breast myoep cell | 1.7    | 6 day  |
|          | Breast epithelia cells(BCM)+10%FCS                                                    | FGF2(10ng/ml)   | prolif of Breast myoep cell | 0.47   | 6 day  |
|          | Breast epithelial cells(BCM)                                                          | none            | prolif of Breast myoep cell | 0.25   | 6 day  |
|          | Breast epithelial cells(BCM)                                                          | none            | prolif of Breast myoep cell | 1.65   | 6 day  |
|          | Breast epithelial cells(BCM)+0.5%FCS                                                  | none            | prolif of Breast myoep cell | 1.55   | 6 day  |
|          | Breast epithelial cells(BCM)+10%FCS                                                   | none            | prolif of Breast myoep cell | 1.5    | 6 day  |
|          | Breast epithelial cells(BCM)                                                          | FGF2(10ng/ml)   | prolif of Breast myoep cell | 1.5    | 6 day  |
|          | Breast epithelia cells(BCM)+10%FCS                                                    | FGF2(10ng/ml)   | prolif of Breast myoep cell | 1.65   | 6 day  |
| 10362356 | Contribution of Src and Ras pathways in FGF-2 induced endothelial celldifferentiation |                 |                             |        |        |
|          | IBEC                                                                                  | none            | cell Number(*10000)         | 4.6    | 3days  |
|          | IBEC                                                                                  | FGF             | cell Number(*10000)         | 11.4   | 3days  |
|          | IBEC                                                                                  | FGF + Manumycin | cell Number(*10000)         | 5      | 3days  |
|          | IBEC                                                                                  | FGF             | ERK12                       | 4      | 120min |
|          | IBEC                                                                                  | FGF             | ERK12                       | 6      | 180min |
|          | IBEC                                                                                  | FGF             | ERK12                       | 8      | 300min |
|          | IBEC                                                                                  | FGF + PD98059   | ERK12                       | 0      | 0min   |
|          | IBEC                                                                                  | FGF + PD98059   | ERK12                       | 2      | 10min  |
|          | IBEC                                                                                  | FGF + PD98059   | ERK12                       | 2      | 60min  |
|          | IBEC                                                                                  | FGF + PD98059   | ERK12                       | 3      | 120min |
|          | IBEC                                                                                  | FGF + PD98059   | ERK12                       | 3      | 180min |
|          | IBEC                                                                                  | FGF + PD98059   | ERK12                       | 3      | 300min |
| IBEC     | none                                                                                  | Cell Number     | 5                           | 3 days |        |

|          |                                                                             |               |                |       |        |
|----------|-----------------------------------------------------------------------------|---------------|----------------|-------|--------|
|          | IBEC                                                                        | FGF           | Cell Number    | 9.3   | 3 days |
|          | IBEC                                                                        | FGF + PD98059 | Cell Number    | 5.7   | 3 days |
|          | IBEC                                                                        | FGF + PD98059 | Cell Number    | 3.5   | 3 days |
|          | IBEC + FN                                                                   | FGF           | Raf1           | 1     | 0min   |
|          | IBEC + FN                                                                   | FGF           | Raf1           | 4.2   | 1min   |
|          | IBEC + FN                                                                   | FGF           | Raf1           | 3.82  | 3min   |
|          | IBEC + FN                                                                   | FGF           | Raf1           | 2.4   | 5min   |
|          | IBEC + FN                                                                   | FGF           | Raf1           | 1.25  | 10min  |
|          | IBEC + FN                                                                   | FGF           | Raf1           | 1.25  | 60min  |
|          | IBEC + Coll                                                                 | FGF           | Raf1           | 1     | 0min   |
|          | IBEC + Coll                                                                 | FGF           | Raf1           | 2.2   | 1min   |
|          | IBEC + Coll                                                                 | FGF           | Raf1           | 2.5   | 3min   |
|          | IBEC + Coll                                                                 | FGF           | Raf1           | 1.27  | 5min   |
|          | IBEC + Coll                                                                 | FGF           | Raf1           | 1     | 10min  |
|          | IBEC + Coll                                                                 | FGF           | Raf1           | 1     | 60min  |
|          | Gq-initiated cardiomyocyte hypertrophy is mediated by phospholipase Cbeta1b |               |                |       |        |
|          | NRVM+Ad-GFP                                                                 | none          | PLC            | 0.75  | 48h    |
|          | NRVM+Ad-PLCbeta1a                                                           | none          | PLC            | 0.7   | 48h    |
|          | NRVM+Ad-PLCbeta1b                                                           | none          | PLC            | 2     | 48h    |
|          | NRVM+Ad-Galpha q wild type                                                  | none          | PLC            | 1.5   | 48h    |
|          | NRVM+Ad-G alpha q active(Q208L)                                             | none          | PLC            | 4.25  | 48h    |
| 19564249 | NRVM                                                                        | none          | Cell Area(um2) | 600   | 48h    |
|          | NRVM+Ad-PLCbeta1a                                                           | none          | Cell Area(um2) | 800   | 48h    |
|          | NRVM+Ad-PLCbeta1b                                                           | none          | Cell Area(um2) | 1200  | 48h    |
|          | NRVM+Ad-Galpha q                                                            | none          | Cell Area(um2) | 1800  | 48h    |
|          | NRVM                                                                        | none          | ANP mRNA       | 0.06  | 48h    |
|          | NRVM+Ad-PLCbeta1a                                                           | none          | ANP mRNA       | 0.055 | 48h    |
|          | NRVM+Ad-PLCbeta1b                                                           | none          | ANP mRNA       | 0.105 | 48h    |
|          | NRVM+Ad-Galpha q                                                            | none          | ANP mRNA       | 0.205 | 48h    |



|  |                                     |                  |           |       |     |
|--|-------------------------------------|------------------|-----------|-------|-----|
|  | NRVM                                | None             | PLC       | 2.5   | 24h |
|  | NRVM+Ad-PLCbeta1a-CT                | None             | PLC       | 2.25  | 24h |
|  | NRVM+Ad-PLCbeta1b-CT                | None             | PLC       | 3.75  | 24h |
|  | NRVM                                | NE               | PLC       | 7     | 24h |
|  | NRVM+Ad-PLCbeta1a-CT                | NE               | PLC       | 6.8   | 24h |
|  | NRVM+Ad-PLCbeta1b-CT                | NE               | PLC       | 3.75  | 24h |
|  | NRVM                                | none             | PLC       | 5     | 24h |
|  | NRVM+Ad-Galpha q                    | none             | PLC       | 25    | 24h |
|  | NRVM+Ad-G alpha q + Ad-PLCbeta1a-CT | none             | PLC       | 25.5  | 24h |
|  | NRVM+Ad-G alpha q +Ad-PLCbeta1b-CT  | none             | PLC       | 4.5   | 24h |
|  | NRVM                                | none             | Cell Area | 800   | 24h |
|  | NRVM                                | PE + Propranolol | Cell Area | 1900  | 24h |
|  | NRVM+Ad-PLCbeta1a-CT                | none             | Cell Area | 1000  | 24h |
|  | NRVM+Ad-PLCbeta1a-CT                | PE + Propranolol | Cell Area | 2050  | 24h |
|  | NRVM+Ad-PLCbeta1b-CT                | none             | Cell Area | 1200  | 24h |
|  | NRVM+Ad-PLCbeta1b-CT                | PE + Propranolol | Cell Area | 1000  | 24h |
|  | NRVM                                | none             | Cell Area | 760   | 24h |
|  | NRVM+Ad-PLCbeta1b-CT                | none             | Cell Area | 820   | 24h |
|  | NRVM+Ad-G alpha q                   | none             | Cell Area | 1220  | 24h |
|  | NRVM+Ad-G alpha q+Ad-PLCbeta1b-CT   | none             | Cell Area | 830   | 24h |
|  | NRVM                                | none             | ANP mRNA  | 0.016 | 24h |
|  | NRVM+Ad-PLCbeta1b-CT                | none             | ANP mRNA  | 0.01  | 24h |
|  | NRVM+Ad-G alpha q                   | none             | ANP mRNA  | 0.07  | 24h |

|          |                                                                                        |      |          |      |      |
|----------|----------------------------------------------------------------------------------------|------|----------|------|------|
|          | NRVM+Ad-G alpha q+Ad-PLCbeta1b-CT                                                      | none | ANP mRNA | 0.01 | 24h  |
| 12507995 | Roles of Gbetagamma in membrane recruitment and activation of p110gamma/p101 PI3Kgamma |      |          |      |      |
|          | p110gamma~p101 : dimerization of p110gamma and p101                                    |      |          |      |      |
|          | HEK cells                                                                              | none | Akt      | 1    |      |
|          | HEK cells                                                                              | FCS  | Akt      | 2.5  |      |
|          | HEK cells+fMLP-R TF + p110gamma                                                        | none | Akt      | 1    | 1day |
|          | HEK cells+fMLP-R TF + p110gamma                                                        | fMLP | Akt      | 1.5  | 1day |
|          | HEK cells+fMLP-R TF + p110gamma+p101 (PI3K)                                            | none | Akt      | 1.5  | 1day |
|          | HEK cells+fMLP-R TF + p110gamma+p101 (PI3K)                                            | fMLP | Akt      | 2    | 1day |
|          | HEK cells+p110gamma-CAAX+fMLP-R                                                        | none | ERK12    | 1    | 1day |
|          | HEK cells+p110gamma-CAAX+fMLP-R+dn Ras                                                 | none | ERK12    | 0.5  | 1day |
|          | HEK cells                                                                              | none | Akt      | 1    | 1day |
|          | HEK cells                                                                              | FCS  | Akt      | 2.5  | 1day |
|          | HEK cells+p110gamma                                                                    | none | Akt      | 0.2  | 1day |
|          | HEK cells+p110gamma                                                                    | fMLP | Akt      | 0.3  | 1day |
|          | HEK cells+p110gamma+p101                                                               | none | Akt      | 0.4  | 1day |
|          | HEK cells+p110gamma+p101                                                               | fMLP | Akt      | 1.3  | 1day |
|          | HEK cells+p110gamma-CAAX                                                               | none | Akt      | 0.4  | 1day |
|          | HEK cells+p110gamma-CAAX                                                               | fMLP | Akt      | 1    | 1day |
|          | HEK cells+p110gamma-                                                                   | none | Akt      | 0.3  | 1day |

|          |                                                                                                                                                           |      |                       |      |       |
|----------|-----------------------------------------------------------------------------------------------------------------------------------------------------------|------|-----------------------|------|-------|
|          | CAAX+p101                                                                                                                                                 |      |                       |      |       |
|          | HEK cells+p110gamma-CAAX+p101                                                                                                                             | fMLP | Akt                   | 1.2  | 1day  |
| 14563709 | Structure, Regulation, and Function of Mammalian Membrane Guanylyl Cyclase Receptors, with a Focus on Guanylyl cyclase-A                                  |      |                       |      |       |
|          | cardiomyocyte(floxed GC-A mice)                                                                                                                           | none | ANP(pg/ml plasma)     | 220  |       |
|          | cardiomyocyte(CM GC-A KO mice)                                                                                                                            | none | ANP(pg/ml plasma)     | 510  |       |
|          | cardiomyocyte(floxed GC-A mice)                                                                                                                           | none | cGMP                  | 20.8 |       |
|          | cardiomyocyte(CM GC-A KO mice)                                                                                                                            | none | cGMP(pmol/ ml plasma) | 45   |       |
| 12727932 | Pressure-independent cardiac hypertrophy in mice with cardiomyocyte-restricted inactivation of the atrial natriuretic peptide receptor guanylyl cyclase-A |      |                       |      |       |
|          | cardiomyocyte(floxed GC-A mice)                                                                                                                           | none | cGMP                  | 65   | 10min |
|          | cardiomyocyte(CM GC-A KO mice)                                                                                                                            | none | cGMP                  | 50   | 10min |
|          | cardiomyocyte(floxed GC-A mice)                                                                                                                           | ANPi | cGMP                  | 200  | 10min |
|          | cardiomyocyte(CM GC-A KO mice)                                                                                                                            | ANPi | cGMP                  | 140  | 10min |
|          | cardiomyocyte(floxed GC-A mice)                                                                                                                           | ANPi | cGMP                  | 325  | 10min |
|          | cardiomyocyte(CM GC-A KO mice)                                                                                                                            | ANPi | cGMP                  | 240  | 10min |
|          | cardiomyocyte(floxed GC-A mice)                                                                                                                           | none | ANP mRNA              | 1    |       |
|          | cardiomyocyte(CM GC-A KO mice)                                                                                                                            | none | ANP mRNA              | 4.9  |       |
|          | cardiomyocyte(floxed GC-A mice)                                                                                                                           | none | sACT                  | 1    |       |
|          | cardiomyocyte(CM GC-A KO mice)                                                                                                                            | none | sACT                  | 1.7  |       |

|                                                        |                                                                                                         |      |           |      |       |
|--------------------------------------------------------|---------------------------------------------------------------------------------------------------------|------|-----------|------|-------|
|                                                        | cardiomyocyte(floxed GC-A mice)                                                                         | none | betaMHC   | 1    |       |
|                                                        | cardiomyocyte(CM GC-A KO mice)                                                                          | none | betaMHC   | 2    |       |
| 8921810                                                | Activation of JAK-STAT and MAP kinases by leukemia inhibitory factor through gp130 in cardiac myocytes. |      |           |      |       |
|                                                        | Cardiomyocytes                                                                                          | none | gp130LIFR | 0    | 0min  |
|                                                        | Cardiomyocytes                                                                                          | LIF  | gp130LIFR | 1    | 2min  |
|                                                        | Cardiomyocytes                                                                                          | LIF  | gp130LIFR | 4    | 5min  |
|                                                        | Cardiomyocytes                                                                                          | LIF  | gp130LIFR | 3    | 15min |
|                                                        | Cardiomyocytes                                                                                          | none | JAK1      | 0    | 0min  |
|                                                        | Cardiomyocytes                                                                                          | LIF  | JAK1      | 1    | 5min  |
|                                                        | Cardiomyocytes                                                                                          | LIF  | JAK1      | 2.5  | 15min |
|                                                        | Cardiomyocytes                                                                                          | none | STAT3     | 0    | 0min  |
|                                                        | Cardiomyocytes                                                                                          | LIF  | STAT3     | 30   | 5min  |
|                                                        | Cardiomyocytes                                                                                          | LIF  | STAT3     | 20   | 15min |
|                                                        | Cardiomyocytes                                                                                          | LIF  | STAT3     | 10   | 30min |
|                                                        | Cardiomyocytes                                                                                          | LIF  | STAT3     | 1    | 60min |
|                                                        | non-myocardial cells                                                                                    | none | STAT3     | 0    | 0min  |
|                                                        | non-myocardial cells                                                                                    | LIF  | STAT3     | 20   | 5min  |
|                                                        | non-myocardial cells                                                                                    | LIF  | STAT3     | 30   | 15min |
|                                                        | non-myocardial cells                                                                                    | LIF  | STAT3     | 10   | 30min |
|                                                        | non-myocardial cells                                                                                    | LIF  | STAT3     | 1    | 60min |
|                                                        | Cardiomyocytes                                                                                          | none | STAT3     | 0.01 | 15min |
|                                                        | Cardiomyocytes                                                                                          | LIF  | STAT3     | 0.01 | 15min |
|                                                        | Cardiomyocytes                                                                                          | LIF  | STAT3     | 1    | 15min |
|                                                        | Cardiomyocytes                                                                                          | LIF  | STAT3     | 10   | 15min |
|                                                        | Neonatal murine CM + LIF (1&10 <sup>3</sup> U/ml) 5min                                                  | none | JAK1      | 1    | 2hr   |
| Neonatal murine CM + LIF (1&10 <sup>3</sup> U/ml) 5min | anti-gp130 blocking Ab                                                                                  | JAK1 | 0.2       | 2hr  |       |

|                                                           |                        |           |      |       |
|-----------------------------------------------------------|------------------------|-----------|------|-------|
| Neonatal murine CM + LIF<br>(1&10 <sup>3</sup> U/ml) 5min | none                   | STAT3     | 1    | 2hr   |
| Neonatal murine CM + LIF<br>(1&10 <sup>3</sup> U/ml) 5min | anti-gp130 blocking Ab | STAT3     | 0.05 | 2hr   |
| Cardiomyocytes                                            | LIF                    | MAPK      | 1    | 0min  |
| Cardiomyocytes                                            | LIF                    | MAPK      | 3    | 2min  |
| Cardiomyocytes                                            | LIF                    | MAPK      | 4.8  | 5min  |
| Cardiomyocytes                                            | LIF                    | MAPK      | 2.8  | 15min |
| Cardiomyocytes                                            | LIF                    | MAPK      | 1    | 30min |
| Cardiomyocytes                                            | LIF                    | MAPK      | 1.2  | 60min |
| Cardiomyocytes                                            | NE                     | MAPK      | 1    | 0min  |
| Cardiomyocytes                                            | NE                     | MAPK      | 5    | 2min  |
| Cardiomyocytes                                            | NE                     | MAPK      | 11.4 | 5min  |
| Cardiomyocytes                                            | NE                     | MAPK      | 8    | 15min |
| Cardiomyocytes                                            | NE                     | MAPK      | 5.75 | 30min |
| Cardiomyocytes                                            | NE                     | MAPK      | 4.8  | 60min |
| Cardiomyocytes                                            | LIF                    | ERK1      | 1    | 0min  |
| Cardiomyocytes                                            | LIF                    | ERK1      | 7    | 5min  |
| Cardiomyocytes                                            | LIF                    | ERK1      | 2.5  | 15min |
| Cardiomyocytes                                            | LIF                    | ERK1      | 0.8  | 30min |
| Cardiomyocytes                                            | LIF                    | ERK1      | 0.7  | 60min |
| Cardiomyocytes                                            | LIF                    | ERK2      | 0    | 0min  |
| Cardiomyocytes                                            | LIF                    | ERK2      | 6    | 5min  |
| Cardiomyocytes                                            | LIF                    | ERK2      | 1    | 15min |
| Cardiomyocytes                                            | LIF                    | ERK2      | 0.5  | 30min |
| Cardiomyocytes                                            | LIF                    | ERK2      | 0.8  | 60min |
| Adult Heart                                               | LIF                    | gp130LIFR | 1    | 0min  |
| Adult Heart                                               | LIF                    | gp130LIFR | 4    | 5min  |
| Adult Heart                                               | LIF                    | gp130LIFR | 0.5  | 15min |
| Adult Heart                                               | LIF                    | STAT3     | 1    | 0min  |

|          |                                                                                                                                                             |         |       |      |       |
|----------|-------------------------------------------------------------------------------------------------------------------------------------------------------------|---------|-------|------|-------|
|          | Adult Heart                                                                                                                                                 | LIF     | STAT3 | 4    | 5min  |
|          | Adult Heart                                                                                                                                                 | LIF     | STAT3 | 6    | 15min |
|          | Adult Heart                                                                                                                                                 | LIF     | STAT3 | 2    | 30min |
|          | Adult Heart                                                                                                                                                 | LIF     | STAT3 | 0.5  | 60min |
|          | Liver                                                                                                                                                       | LIF     | STAT3 | 0    | 0min  |
|          | Liver                                                                                                                                                       | LIF     | STAT3 | 1    | 5min  |
|          | Liver                                                                                                                                                       | LIF     | STAT3 | 1.5  | 15min |
|          | Liver                                                                                                                                                       | LIF     | STAT3 | 0.02 | 30min |
|          | Liver                                                                                                                                                       | LIF     | STAT3 | 0    | 60min |
|          | Adult Heart                                                                                                                                                 | IL6     | STAT3 | 0    | 0min  |
|          | Adult Heart                                                                                                                                                 | IL6     | STAT3 | 0    | 5min  |
|          | Adult Heart                                                                                                                                                 | IL6     | STAT3 | 0    | 15min |
|          | Adult Heart                                                                                                                                                 | IL6     | STAT3 | 0    | 30min |
|          | Adult Heart                                                                                                                                                 | NE      | STAT3 | 0    | 0min  |
|          | Adult Heart                                                                                                                                                 | NE      | STAT3 | 0    | 5min  |
|          | Adult Heart                                                                                                                                                 | NE      | STAT3 | 0    | 15min |
|          | Adult Heart                                                                                                                                                 | NE      | STAT3 | 0    | 30min |
|          | Adult Heart                                                                                                                                                 | LIF     | MAPK  | 1    | 0min  |
|          | Adult Heart                                                                                                                                                 | LIF     | MAPK  | 2.7  | 5min  |
|          | Adult Heart                                                                                                                                                 | LIF     | MAPK  | 1.05 | 15min |
|          | Adult Heart                                                                                                                                                 | LIF     | MAPK  | 1    | 30min |
|          | Activation of gp130 Transduces Hypertrophic signal through interaction of scaffolding/docking protein Gab1 with tyrosine phosphatase SHP2 in cardiomyocytes |         |       |      |       |
| 12855672 | NRVM                                                                                                                                                        | control | Gab1  | 1    | 5min  |
|          | NRVM                                                                                                                                                        | LIF     | Gab1  | 8    | 5min  |
|          | NRVM                                                                                                                                                        | NE      | Gab1  | 1    | 5min  |
|          | NRVM                                                                                                                                                        | ET1     | Gab1  | 1.1  | 5min  |
|          | NRVM                                                                                                                                                        | AngII   | Gab1  | 1.5  | 5min  |
|          | NRVM                                                                                                                                                        | control | SHP2  | 1    | 5min  |
|          | NRVM                                                                                                                                                        | LIF     | SHP2  | 9    | 5min  |

|      |       |                        |     |       |
|------|-------|------------------------|-----|-------|
| NRVM | NE    | SHP2                   | 0.5 | 5min  |
| NRVM | ET1   | SHP2                   | 0.8 | 5min  |
| NRVM | AngII | SHP2                   | 0.8 | 5min  |
| NRVM | LIF   | Gab1                   | 0   | 0min  |
| NRVM | LIF   | Gab1                   | 1   | 2min  |
| NRVM | LIF   | Gab1                   | 10  | 5min  |
| NRVM | LIF   | Gab1                   | 5   | 10min |
| NRVM | LIF   | Gab1                   | 0.2 | 30min |
| NRVM | LIF   | Gab1                   | 0   | 60min |
| NRVM | none  | Gab1                   | 1   | 5min  |
| NRVM | LIF   | Gab1                   | 2   | 5min  |
| NRVM | LIF   | Gab1                   | 4.5 | 5min  |
| NRVM | LIF   | Gab1                   | 6   | 5min  |
| NRVM | LIF   | SHP2                   | 0   | 0min  |
| NRVM | LIF   | SHP2                   | 1   | 2min  |
| NRVM | LIF   | SHP2                   | 3   | 5min  |
| NRVM | LIF   | SHP2                   | 5   | 10min |
| NRVM | LIF   | SHP2                   | 1.5 | 30min |
| NRVM | LIF   | SHP2                   | 0.3 | 60min |
| NRVM | none  | SHP2                   | 1   | 5min  |
| NRVM | LIF   | SHP2                   | 1   | 5min  |
| NRVM | LIF   | SHP2                   | 3   | 5min  |
| NRVM | LIF   | SHP2                   | 5   | 5min  |
| NRVM | none  | Tyrosine phospho- Gab1 | 1   | 5min  |
| NRVM | LIF   | Tyrosine phospho- Gab1 | 10  | 5min  |
| NRVM | none  | Tyrosine phospho- SHP2 | 1   | 5min  |
| NRVM | LIF   | Tyrosine phospho- SHP2 | 50  | 5min  |

| Ad Gab1F627/659 -(LIF->longitudinal elongation) |                                                                                                                             |               |          |                                  |                    |
|-------------------------------------------------|-----------------------------------------------------------------------------------------------------------------------------|---------------|----------|----------------------------------|--------------------|
|                                                 | NRVM+Ad beta-gal                                                                                                            | none          | CellArea | 1                                | 24h                |
|                                                 | NRVM+Ad beta-gal                                                                                                            | LIF           | CellArea | 1.7                              | 24h                |
|                                                 | NRVM+Ad Gab1WT                                                                                                              | none          | CellArea | 1                                | 24h                |
|                                                 | NRVM+Ad beta-gal                                                                                                            | LIF           | Akt      | 2.25                             | 10min              |
|                                                 | NRVM+Ad beta-gal                                                                                                            | LIF           | Akt      | 1.5                              | 30min              |
|                                                 | NRVM+Ad Gab1WT                                                                                                              | LIF           | Akt      | 1                                | 0min               |
|                                                 | NRVM+Ad Gab1WT                                                                                                              | LIF           | Akt      | 1.8                              | 2min               |
|                                                 | NRVM+Ad Gab1WT                                                                                                              | LIF           | Akt      | 2.1                              | 5min               |
|                                                 | NRVM+Ad Gab1WT                                                                                                              | LIF           | Akt      | 3.8                              | 10min              |
|                                                 | NRVM+Ad Gab1WT                                                                                                              | LIF           | Akt      | 1.78                             | 30min              |
|                                                 | NRVM+Ad Gab1F627/659                                                                                                        | LIF           | Akt      | 1                                | 0min               |
|                                                 | NRVM+Ad Gab1F627/659                                                                                                        | LIF           | Akt      | 1.8                              | 2min               |
|                                                 | NRVM+Ad Gab1F627/659                                                                                                        | LIF           | Akt      | 2.75                             | 5min               |
|                                                 | NRVM+Ad Gab1F627/659                                                                                                        | LIF           | Akt      | 4.1                              | 10min              |
|                                                 | NRVM+Ad Gab1F627/659                                                                                                        | LIF           | Akt      | 2.75                             | 30min              |
|                                                 | NRVM+Ad Gab1WT+Ad beta-gal                                                                                                  | none          | CellArea | 1                                | 24h                |
|                                                 | NRVM+Ad Gab1WT+Ad beta-gal                                                                                                  | LIF           | CellArea | 1.6                              | 24h                |
|                                                 | NRVM+Ad Gab1WT+Ad ERK5AEF                                                                                                   | none          | CellArea | 1                                | 24h                |
|                                                 | NRVM+Ad Gab1WT+Ad ERK5AEF                                                                                                   | LIF           | CellArea | 1.07                             | 24h                |
|                                                 | MEK1 and the extracellular signal-regulated kinases are required for the stimulation of IL-2 gene transcription in T cells. |               |          |                                  |                    |
| 8557975                                         | Jurkat T cells                                                                                                              | anti-CD3 mAb  | MEK1     | 0.6/2.0/1.6<br>/1.4/1.0          | 0/5/10/15/60/90min |
|                                                 | Jurkat T cells                                                                                                              | anti-CD3 mAb  | ERK2     | 0.4/1.3/2.4<br>/1.3/1.1/0.<br>45 | 0/5/10/15/60/90min |
| 11387209                                        | Activated MEK5 induces serial assembly of sarcomeres and eccentric cardiac hypertrophy                                      |               |          |                                  |                    |
|                                                 | NR cardiomyocytes                                                                                                           | 100 microM PE | ERK5     | 1                                | 0min               |



|         |                                                                                                            |                   |                    |      |                |
|---------|------------------------------------------------------------------------------------------------------------|-------------------|--------------------|------|----------------|
|         | NR cardiomyocytes                                                                                          | 100 microM PE     | ERK5               | 2.75 | 5min           |
|         | NR cardiomyocytes                                                                                          | 100 microM PE     | ERK5               | 3.75 | 10min          |
|         | NR cardiomyocytes                                                                                          | 100 microM PE     | ERK5               | 2.5  | 20min          |
|         | NR cardiomyocytes                                                                                          | 100 microM PE     | ERK5               | 1.5  | 60min          |
|         | NR cardiomyocytes                                                                                          | 1000U/ml LIF      | ERK5               | 1    | 0min           |
|         | NR cardiomyocytes                                                                                          | 1000U/ml LIF      | ERK5               | 2.2  | 5min           |
|         | NR cardiomyocytes                                                                                          | 1000U/ml LIF      | ERK5               | 3    | 10min          |
|         | NR cardiomyocytes                                                                                          | 1000U/ml LIF      | ERK5               | 2    | 20min          |
|         | NR cardiomyocytes                                                                                          | 1000U/ml LIF      | ERK5               | 0.85 | 60min          |
|         | NR cardiomyocytes                                                                                          |                   |                    |      |                |
|         | Cardiomyocytes + MEK5WT TF                                                                                 | PE(50uM)          | sACT               | 8    | 24h            |
|         | Cardiomyocytes + dnMEK5 TF                                                                                 | PE(50uM)          | sACT               | 2.8  | 24h            |
|         | Cardiomyocytes + MEK5WT TF                                                                                 | LIF(1000U/ml)     | sACT               | 4.8  | 24h            |
|         | Cardiomyocytes + dnMEK5 TF                                                                                 | LIF(1000U/ml)     | sACT               | 1    | 24h            |
|         | Cardiomyocytes + beta-galactosidase TF                                                                     | PE(50uM)          | sACT               | 5    | 24h            |
|         | Cardiomyocytes + beta-galactosidase TF                                                                     | LIF(1000U/ml)     | sACT               | 4    | 24h            |
|         | Cardiomyocytes + MEK5WT TF                                                                                 | PE(50uM)          | ANF                | 5.75 | 24h            |
|         | Cardiomyocytes + dnMEK5 TF                                                                                 | PE(50uM)          | ANF                | 2    | 24h            |
| 9751683 | Norepinephrine stimulates apoptosis in adult rat ventricular myocytes by activation of the beta-AR pathway |                   |                    |      |                |
|         | ARVM(adult rat ventricular myocytes)                                                                       | control           | Apoptosis(%of t=0) | 10   | 24h            |
|         | ARVM                                                                                                       | NE(10microM/L)    | Apoptosis(%of t=0) | 36   | 24h            |
|         | ARVM                                                                                                       | PRO(2microM/L)+NE | Apoptosis(%of t=0) | 14   | 30minPRO 24hNE |

|         |                                                     |                              |                    |        |               |
|---------|-----------------------------------------------------|------------------------------|--------------------|--------|---------------|
|         | ARVM                                                | PZ(0.1microM/L)+NE           | Apoptosis(%of t=0) | 42     | 30minPZ 24hNE |
|         | ARVM                                                | control                      | Apoptosis(%)       | 5.7    | 30min         |
|         | ARVM                                                | NE(10microM/L)               | Apoptosis(%)       | 17     | 30min         |
|         | ARVM                                                | NE+PRO(2microM/L)            | Apoptosis(%)       | 7      | 30min         |
|         | ARVM                                                | NE+PZ(0.1microM/L)           | Apoptosis(%)       | 14     | 30min         |
|         | ARVM                                                | control                      | Apoptosis(%)       | 7      | 24h           |
|         | ARVM                                                | ISO(10microM/L)              | Apoptosis(%)       | 14.6   | 24h           |
|         | ARVM                                                | FSK(10microM/L)              | Apoptosis(%)       | 14.375 | 24h           |
|         | ARVM                                                | control                      | Apoptosis(%)       | 7      | Time Course   |
|         | ARVM                                                | NE(10microM/L)               | Apoptosis(%)       | 10.625 |               |
|         | ARVM                                                | H-89(20microM/L)             | Apoptosis(%)       | 4.28   |               |
|         | ARVM                                                | NE+H-89(20microM/L)          | Apoptosis(%)       | 5.3    |               |
|         | ARVM                                                | control                      | Apoptosis(%)       | 8.75   |               |
|         | ARVM                                                | NE(10microM/L)               | Apoptosis(%)       | 15.7   |               |
|         | ARVM                                                | DLTZ(diltiazem:1microM/L)    | Apoptosis(%)       | 9.4    |               |
|         | ARVM                                                | NE+DLTZ(diltiazem:1microM/L) | Apoptosis(%)       | 8.8    |               |
|         | p38 MAPK expression and activation in smooth muscle |                              |                    |        |               |
| 9688607 | Colonic muscle strips                               | Ach                          | p38                | 1      | 0min          |
|         | Colonic muscle strips                               | Ach                          | p38                | 3.75   | 1min          |
|         | Colonic muscle strips                               | Ach                          | p38                | 4.75   | 5min          |
|         | Colonic muscle strips                               | Ach                          | p38                | 7.6    | 10min         |
|         | Colonic muscle strips                               | Ach                          | p38                | 6.8    | 20min         |
|         | Colonic muscle strips                               | Ach                          | p38                | 3.6    | 30min         |
|         | colonic smooth muscle                               | none                         | ATF2               | 0      | 0min          |
|         | colonic smooth muscle                               | none                         | ATF2               | 2500   | 30min         |
|         | colonic smooth muscle                               | none                         | ATF2               | 7000   | 180min        |
|         | colonic smooth muscle                               | SB202190                     | ATF2               | 0      | 0min          |

|                           |                                                                                                  |          |       |          |        |
|---------------------------|--------------------------------------------------------------------------------------------------|----------|-------|----------|--------|
|                           | colonic smooth muscle                                                                            | SB202190 | ATF2  | 0        | 30min  |
|                           | colonic smooth muscle                                                                            | SB202190 | ATF2  | 0        | 180min |
| 8622669                   | MKK3 and MKK6 regulated gene expression is mediated by the p38 MAPK signal transduction pathway. |          |       |          |        |
|                           | CHO cell+MKK3 TF                                                                                 | none     | p38   | positive | 48hr   |
|                           | CHO cell+MKK3 TF                                                                                 | none     | ERK   | 1        | 48hr   |
|                           | CHO cell+MKK3 TF                                                                                 | none     | JNK   | 1        | 48hr   |
|                           | CHO cell+MEK1 TF                                                                                 | none     | p38   | 1        | 48hr   |
|                           | CHO cell+MEK1 TF                                                                                 | none     | ERK   | positive | 48hr   |
|                           | CHO cell+MEK1 TF                                                                                 | none     | JNK   | 1        | 48hr   |
|                           | CHO cell                                                                                         | none     | cJun  | 1        | 48hr   |
|                           | CHO cell+MKK3 TF + p38 TF                                                                        | none     | cJun  | 6        | 48hr   |
|                           | CHO cell+ERK TF                                                                                  | none     | cJun  | 28       | 48hr   |
|                           | CHO cell                                                                                         | none     | cFos  | 1        | 48hr   |
|                           | CHO cell+MKK3 TF + p38 TF                                                                        | none     | cFos  | 7        | 48hr   |
|                           | CHO cell+ERK TF                                                                                  | none     | cFos  | 5        | 48hr   |
|                           | CHO cell                                                                                         | none     | ATF2  | 1        | 48hr   |
|                           | CHO cell+MKK3 TF + p38 TF                                                                        | none     | ATF2  | 5        | 48hr   |
|                           | CHO cell+ERK TF                                                                                  | none     | ATF2  | 1.5      | 48hr   |
|                           | CHO cell                                                                                         | none     | cJun  | 1        | 48hr   |
|                           | CHO cell+MKK3 TF + p38 TF                                                                        | none     | cJun  | 1.5      | 48hr   |
|                           | CHO cell+ERK TF                                                                                  | none     | cJun  | 3        | 48hr   |
|                           | CHO cell                                                                                         | none     | ELK1  | 1        | 48hr   |
| CHO cell+MKK3 TF + p38 TF | none                                                                                             | ELK1     | 6.5   | 48hr     |        |
| CHO cell+ERK TF           | none                                                                                             | ELK1     | 6.5   | 48hr     |        |
| 10330143<br>From here     | Targeting of p38 MAPK to MEF2 transcriptional factors                                            |          |       |          |        |
|                           | COS                                                                                              | p38      | MEF2A | 20       | 15min  |

|                                                               |                                                                                                                                                                               |                       |                                      |      |        |
|---------------------------------------------------------------|-------------------------------------------------------------------------------------------------------------------------------------------------------------------------------|-----------------------|--------------------------------------|------|--------|
|                                                               | COS                                                                                                                                                                           | p38                   | MEF2A                                | 30   | 30min  |
|                                                               | COS                                                                                                                                                                           | p38                   | MEF2A                                | 60   | 60min  |
|                                                               | COS                                                                                                                                                                           | p38                   | MEF2A                                | 100  | 120min |
|                                                               | COS                                                                                                                                                                           | p38                   | MEF2C                                | 10   | 15min  |
|                                                               | COS                                                                                                                                                                           | p38                   | MEF2C                                | 30   | 30min  |
|                                                               | COS                                                                                                                                                                           | p38                   | MEF2C                                | 60   | 60min  |
|                                                               | COS                                                                                                                                                                           | p38                   | MEF2C                                | 100  | 120min |
|                                                               | COS                                                                                                                                                                           | none                  | MEF2A                                | 2.5  |        |
|                                                               | COS + CA MKK6/p38                                                                                                                                                             | none                  | MEF2A                                | 53   |        |
|                                                               | COS                                                                                                                                                                           | none                  | MEF2C                                | 2    |        |
|                                                               | COS + CA MKK6/p38                                                                                                                                                             | none                  | MEF2C                                | 32.5 |        |
| 18390926                                                      | The extreme C-terminal region of phospholipase Cbeta1 determines subcellular localizaiton and function; the "b" splice variant mediates alpha1-ar responses in cardiomyocytes |                       |                                      |      |        |
|                                                               | NRVM+Lac Z                                                                                                                                                                    | none                  | PLC                                  | 1.3  |        |
|                                                               | NRVM+G alpha q-WT                                                                                                                                                             | none                  | PLC                                  | 2.8  |        |
|                                                               | NRVM+G alpha q(Q209L)                                                                                                                                                         | none                  | PLC                                  | 5.8  |        |
|                                                               | NRVM+G alpha q(Q209L,D243A,N244A,E245A)                                                                                                                                       | none                  | PLC                                  | 2.2  |        |
| 9247274                                                       | c-AMP-dependent regulation of cardiac L-type Ca <sup>2+</sup> channels requires membrane targeting of PKA and phosphorylation of channel subunits.                            |                       |                                      |      |        |
|                                                               | Cardiac Myocytes                                                                                                                                                              | isoproterenol         | Relative increase in I <sub>Ca</sub> | 1.75 |        |
|                                                               | Cardiac Myocytes                                                                                                                                                              | isoproterenol +PKI    | Relative increase in I <sub>Ca</sub> | 1.1  |        |
|                                                               | Cardiac Myocytes                                                                                                                                                              | isoproterenol + HT31  | Relative increase in I <sub>Ca</sub> | 1.2  |        |
|                                                               | Cardiac Myocytes                                                                                                                                                              | isoproterenol + HT31P | Relative increase in I <sub>Ca</sub> | 1.7  |        |
| 10347087<br>HOE642(Na <sup>+</sup> /H <sup>+</sup> exchanger) | Mechanical stretch activates the JAK/STAT pathway in rat cardiomyocytes.                                                                                                      |                       |                                      |      |        |
|                                                               | Cardiomyocytes                                                                                                                                                                | Stretch               | JAK1                                 | 0    | 0min   |
|                                                               | Cardiomyocytes                                                                                                                                                                | Stretch               | JAK1                                 | 1    | 2min   |

|                                                                                                                                                                                                                                                                                                                                                    |                |                 |       |                           |                           |
|----------------------------------------------------------------------------------------------------------------------------------------------------------------------------------------------------------------------------------------------------------------------------------------------------------------------------------------------------|----------------|-----------------|-------|---------------------------|---------------------------|
| inhibitor)<br>BAPTA-AM(intracellular calcium chelator)<br>gadolinium (stretch-activated ion channel inhibitor)<br>EGTA (extracellular ca2+ chelator)<br>KN62(Ca2+/calmodulin kinase2 inhibitor)<br>chelerythrin (PKC inhibitor)<br>CV11974(AT1 blocker)<br>TAK044(endothelin-1-type A/B-receptor blocker)<br>RX435(anti-glycoprotein 130 antibody) | Cardiomyocytes | Stretch         | JAK1  | 4                         | 5min                      |
|                                                                                                                                                                                                                                                                                                                                                    | Cardiomyocytes | Stretch         | JAK1  | 3                         | 15min                     |
|                                                                                                                                                                                                                                                                                                                                                    | Cardiomyocytes | Stretch         | JAK1  | 2                         | 30min                     |
|                                                                                                                                                                                                                                                                                                                                                    | Cardiomyocytes | Stretch         | JAK2  | 1                         | 0min                      |
|                                                                                                                                                                                                                                                                                                                                                    | Cardiomyocytes | Stretch         | JAK2  | 2.5                       | 2min                      |
|                                                                                                                                                                                                                                                                                                                                                    | Cardiomyocytes | Stretch         | JAK2  | 3                         | 5min                      |
|                                                                                                                                                                                                                                                                                                                                                    | Cardiomyocytes | Stretch         | JAK2  | 2.5                       | 15min                     |
|                                                                                                                                                                                                                                                                                                                                                    | Cardiomyocytes | Stretch         | JAK2  | 1                         | 30min                     |
|                                                                                                                                                                                                                                                                                                                                                    | Cardiomyocytes | Stretch         | STAT1 | 1                         | 0min                      |
|                                                                                                                                                                                                                                                                                                                                                    | Cardiomyocytes | Stretch         | STAT1 | 5                         | 2min                      |
|                                                                                                                                                                                                                                                                                                                                                    | Cardiomyocytes | Stretch         | STAT1 | 5.5                       | 5min                      |
|                                                                                                                                                                                                                                                                                                                                                    | Cardiomyocytes | Stretch         | STAT1 | 3.5                       | 15min                     |
|                                                                                                                                                                                                                                                                                                                                                    | Cardiomyocytes | Stretch         | STAT1 | 3.5                       | 30min                     |
|                                                                                                                                                                                                                                                                                                                                                    | Cardiomyocytes | Stretch         | STAT3 | 1                         | 0min                      |
|                                                                                                                                                                                                                                                                                                                                                    | Cardiomyocytes | Stretch         | STAT3 | 2                         | 2min                      |
|                                                                                                                                                                                                                                                                                                                                                    | Cardiomyocytes | Stretch         | STAT3 | 3.5                       | 5min                      |
|                                                                                                                                                                                                                                                                                                                                                    | Cardiomyocytes | Stretch         | STAT3 | 4                         | 15min                     |
|                                                                                                                                                                                                                                                                                                                                                    | Cardiomyocytes | Stretch         | STAT3 | 2                         | 30min                     |
|                                                                                                                                                                                                                                                                                                                                                    | Cardiomyocytes | none            | STAT1 | 1                         | 30min Treat 6min 20% stre |
|                                                                                                                                                                                                                                                                                                                                                    | Cardiomyocytes | Stretch         | STAT1 | 2.5                       | 30min Treat 6min 20% stre |
|                                                                                                                                                                                                                                                                                                                                                    | Cardiomyocytes | AG490 + Stretch | STAT1 | 0.5                       | 30min Treat 6min 20% stre |
|                                                                                                                                                                                                                                                                                                                                                    | Cardiomyocytes | none            | STAT3 | 1                         | 30min Treat 6min 20% stre |
|                                                                                                                                                                                                                                                                                                                                                    | Cardiomyocytes | Stretch         | STAT3 | 2.5                       | 30min Treat 6min 20% stre |
|                                                                                                                                                                                                                                                                                                                                                    | Cardiomyocytes | AG490 + Stretch | STAT3 | 1                         | 30min Treat 6min 20% stre |
| Cardiomyocytes                                                                                                                                                                                                                                                                                                                                     | none           | STAT3           |       | 30min Treat 6min 20% stre |                           |
| Cardiomyocytes                                                                                                                                                                                                                                                                                                                                     | LIF            | STAT3           |       | 30min Treat 6min 20% stre |                           |
| Cardiomyocytes                                                                                                                                                                                                                                                                                                                                     | AG490 + LIF    | STAT3           |       | 30min Treat 6min 20% stre |                           |
| Cardiomyocytes                                                                                                                                                                                                                                                                                                                                     | none           | STAT1           | 1     | 30min Treat 6min 20% stre |                           |
| Cardiomyocytes                                                                                                                                                                                                                                                                                                                                     | LIF            | STAT1           | 5     | 30min Treat 6min 20% stre |                           |
| Cardiomyocytes                                                                                                                                                                                                                                                                                                                                     | AG490 + LIF    | STAT1           | 4     | 30min Treat 6min 20% stre |                           |

|                      |                                  |           |     |                             |
|----------------------|----------------------------------|-----------|-----|-----------------------------|
| Mouse cardiomyocytes | none                             | STAT3     | 1   | 30min Treat 6min 20% stre   |
| Mouse cardiomyocytes | Stretch                          | STAT3     | 6   | 30min Treat 6min 20% stre   |
| Mouse cardiomyocytes | Stretch + anti-gp130 blocking Ab | STAT3     | 2   | 30min Treat 6min 20% stre   |
| Mouse cardiomyocytes | LIF                              | STAT3     | 7.5 | 30min Treat 6min 20% stre   |
| Mouse cardiomyocytes | LIF + anti-gp130 blocking Ab     | STAT3     | 3   | 30min Treat 6min 20% stre   |
| Mouse cardiomyocytes | none                             | STAT1     | 1   |                             |
| Mouse cardiomyocytes | Stretch                          | STAT1     | 5   |                             |
| Mouse cardiomyocytes | Stretch + anti-gp130 blocking Ab | STAT1     | 4   |                             |
| Mouse cardiomyocytes | none                             | STAT3     | 1   |                             |
| Mouse cardiomyocytes | Stretch                          | STAT3     | 5   |                             |
| Mouse cardiomyocytes | Stretch + anti-gp130 blocking Ab | STAT3     | 2   |                             |
| Rat cardiomyocytes   | Stretch                          | gp130LIFR | 1   | 0min                        |
| Rat cardiomyocytes   | Stretch                          | gp130LIFR | 6   | 2min                        |
| Rat cardiomyocytes   | Stretch                          | gp130LIFR | 4   | 5min                        |
| Rat cardiomyocytes   | Stretch                          | gp130LIFR | 4   | 15min                       |
| Cardiomyocytes       | Stretch + BAPTA-AM               | STAT3     | 6   | 6min 20% stretch 60min tre  |
| Cardiomyocytes       | Stretch + BAPTA-AM               | STAT3     | 6   | 6min 20% stretch 60min tre  |
| Cardiomyocytes       | Stretch + BAPTA-AM               | STAT3     | 0.5 | 6min 20% stretch 60min tre  |
| Cardiomyocytes       | none                             | STAT3     | 1   | 6min                        |
| Cardiomyocytes       | Stretch                          | STAT3     | 2.5 | 6min                        |
| Cardiomyocytes       | Stretch + chelerythrine          | STAT3     | 0.7 | 6min 20% stretch 30min tre  |
| Cardiomyocytes       | PMA                              | STAT3     | 5   | 6min 20% stretch 120min tre |
| Cardiomyocytes       | none                             | STAT1     | 1   | 6min                        |
| Cardiomyocytes       | chelerythrine                    | STAT1     | 1   | 6min 20% stretch 30min tre  |
| Cardiomyocytes       | Stretch                          | STAT1     | 3   | 6min                        |
| Cardiomyocytes       | Stretch + chelerythrine          | STAT1     | 2   | 6min 20% stretch 30min tre  |
| Cardiomyocytes       | PMA                              | STAT1     | 4   | 6min 20% stretch 120min tre |

| Biphasic activation of the jak/stat pathway by angiotensin2 in rat cardiomyocytes |                |       |       |       |       |
|-----------------------------------------------------------------------------------|----------------|-------|-------|-------|-------|
| 9468195                                                                           | Cardiomyocytes | AngII | JAK2  | 0.067 | 0min  |
|                                                                                   | Cardiomyocytes | AngII | JAK2  | 0.067 | 2min  |
|                                                                                   | Cardiomyocytes | AngII | JAK2  | 0.067 | 5min  |
|                                                                                   | Cardiomyocytes | AngII | JAK2  | 0.5   | 15min |
|                                                                                   | Cardiomyocytes | AngII | JAK2  | 1     | 30min |
|                                                                                   | Cardiomyocytes | LIF   | JAK2  | 0.03  | 0min  |
|                                                                                   | Cardiomyocytes | LIF   | JAK2  | 0.6   | 2min  |
|                                                                                   | Cardiomyocytes | LIF   | JAK2  | 1     | 5min  |
|                                                                                   | Cardiomyocytes | LIF   | JAK2  | 0.475 | 15min |
|                                                                                   | Cardiomyocytes | LIF   | JAK2  | 0.067 | 30min |
|                                                                                   | Cardiomyocytes | AngII | STAT1 | 0.15  | 0min  |
|                                                                                   | Cardiomyocytes | AngII | STAT1 | 0.15  | 2min  |
|                                                                                   | Cardiomyocytes | AngII | STAT1 | 0.05  | 5min  |
|                                                                                   | Cardiomyocytes | AngII | STAT1 | 1     | 15min |
|                                                                                   | Cardiomyocytes | AngII | STAT1 | 0.95  | 30min |
|                                                                                   | Cardiomyocytes | LIF   | STAT1 | 0     | 0min  |
|                                                                                   | Cardiomyocytes | LIF   | STAT1 | 0.2   | 2min  |
|                                                                                   | Cardiomyocytes | LIF   | STAT1 | 1     | 5min  |
|                                                                                   | Cardiomyocytes | LIF   | STAT1 | 1     | 15min |
|                                                                                   | Cardiomyocytes | LIF   | STAT1 | 0.1   | 30min |
|                                                                                   | Cardiomyocytes | AngII | STAT2 | 0.1   | 0min  |
|                                                                                   | Cardiomyocytes | AngII | STAT2 | 0.1   | 2min  |
|                                                                                   | Cardiomyocytes | AngII | STAT2 | 0.3   | 5min  |
|                                                                                   | Cardiomyocytes | AngII | STAT2 | 0.6   | 15min |
|                                                                                   | Cardiomyocytes | AngII | STAT2 | 1     | 30min |
|                                                                                   | Cardiomyocytes | LIF   | STAT2 | 0     | 0min  |
|                                                                                   | Cardiomyocytes | LIF   | STAT2 | 0     | 2min  |
|                                                                                   | Cardiomyocytes | LIF   | STAT2 | 0     | 5min  |
|                                                                                   | Cardiomyocytes | LIF   | STAT2 | 0     | 15min |

|                |                               |           |      |        |
|----------------|-------------------------------|-----------|------|--------|
| Cardiomyocytes | LIF                           | STAT2     | 0    | 30min  |
| Cardiomyocytes | AngII                         | STAT3     | 0    | 0min   |
| Cardiomyocytes | AngII                         | STAT3     | 0    | 2min   |
| Cardiomyocytes | AngII                         | STAT3     | 0    | 5min   |
| Cardiomyocytes | AngII                         | STAT3     | 0    | 15min  |
| Cardiomyocytes | AngII                         | STAT3     | 0    | 30min  |
| Cardiomyocytes | LIF                           | STAT3     | 0    | 0min   |
| Cardiomyocytes | LIF                           | STAT3     | 0.9  | 2min   |
| Cardiomyocytes | LIF                           | STAT3     | 1    | 5min   |
| Cardiomyocytes | LIF                           | STAT3     | 0.7  | 15min  |
| Cardiomyocytes | LIF                           | STAT3     | 0.2  | 30min  |
| Cardiomyocytes | AngII                         | STAT1     | 0    | 0min   |
| Cardiomyocytes | AngII                         | STAT1     | 0    | 5min   |
| Cardiomyocytes | AngII                         | STAT1     | 1    | 15min  |
| Cardiomyocytes | AngII                         | STAT1     | 0    | 60min  |
| Cardiomyocytes | AngII                         | STAT1     | 0.9  | 120min |
| Cardiomyocytes | AngII                         | STAT3     | 0    | 0min   |
| Cardiomyocytes | AngII                         | STAT3     | 1    | 5min   |
| Cardiomyocytes | AngII                         | STAT3     | 0    | 15min  |
| Cardiomyocytes | AngII                         | STAT3     | 0.5  | 30min  |
| Cardiomyocytes | AngII                         | STAT3     | 0.5  | 60min  |
| Cardiomyocytes | AngII                         | STAT3     | 2.5  | 120min |
| Cardiomyocytes | Ang2 (10 <sup>-7</sup> mol/L) | Tyr-STAT1 | 0    | 0min   |
| Cardiomyocytes | Ang2 (10 <sup>-7</sup> mol/L) | Tyr-STAT1 | 0    | 5min   |
| Cardiomyocytes | Ang2 (10 <sup>-7</sup> mol/L) | Tyr-STAT1 | 1    | 15min  |
| Cardiomyocytes | Ang2 (10 <sup>-7</sup> mol/L) | Tyr-STAT1 | 0.9  | 30min  |
| Cardiomyocytes | Ang2 (10 <sup>-7</sup> mol/L) | Tyr-STAT1 | 0    | 60min  |
| Cardiomyocytes | Ang2 (10 <sup>-7</sup> mol/L) | Tyr-STAT1 | 0.85 | 120min |
| Cardiomyocytes | Ang2 (10 <sup>-7</sup> mol/L) | Tyr-STAT3 | 0.1  | 0min   |
| Cardiomyocytes | Ang2 (10 <sup>-7</sup> mol/L) | Tyr-STAT3 | 0.15 | 5min   |



|          |                                                                                             |                                |           |      |        |
|----------|---------------------------------------------------------------------------------------------|--------------------------------|-----------|------|--------|
|          | Cardiomyocytes                                                                              | Ang2 (10 <sup>-7</sup> mol/L)  | Tyr-STAT3 | 0.05 | 15min  |
|          | Cardiomyocytes                                                                              | Ang2 (10 <sup>-7</sup> mol/L)  | Tyr-STAT3 | 0.1  | 30min  |
|          | Cardiomyocytes                                                                              | Ang2 (10 <sup>-7</sup> mol/L)  | Tyr-STAT3 | 0.13 | 60min  |
|          | Cardiomyocytes                                                                              | Ang2 (10 <sup>-7</sup> mol/L)  | Tyr-STAT3 | 1    | 120min |
|          | Cardiomyocytes                                                                              | none                           | STAT1     | 1    |        |
|          | Cardiomyocytes                                                                              | Ang2                           | STAT1     | 5    |        |
|          | Cardiomyocytes                                                                              | Ang2 + CV11974                 | STAT1     | 1.3  |        |
|          | Cardiomyocytes                                                                              | none                           | STAT1     | 1    |        |
|          | Cardiomyocytes                                                                              | Ang2                           | STAT1     | 6    |        |
|          | Cardiomyocytes                                                                              | Ang2 + CV11974                 | STAT1     | 5.7  | 30min  |
|          | Cardiomyocytes                                                                              | Ang2 + CV11974                 | STAT1     | 6    | 60min  |
| 10559134 | Characterization of IGF-1-induced activation of the JAK/STAT Pathway in Rat Cardiomyocytes. |                                |           |      |        |
|          | Cardiomyocytes                                                                              | IGF-1 (10 <sup>-8</sup> mol/L) | JAK2      | 1    | 0min   |
|          | Cardiomyocytes                                                                              | IGF-1 (10 <sup>-8</sup> mol/L) | JAK2      | 1    | 5min   |
|          | Cardiomyocytes                                                                              | IGF-1 (10 <sup>-8</sup> mol/L) | JAK2      | 1    | 15min  |
|          | Cardiomyocytes                                                                              | IGF-1 (10 <sup>-8</sup> mol/L) | JAK2      | 1    | 30min  |
|          | Cardiomyocytes                                                                              | LIF                            | JAK2      | 5    | 5min   |
|          | Cardiomyocytes                                                                              | IGF-1 (10 <sup>-8</sup> mol/L) | Raf1      | 1    | 0min   |
|          | Cardiomyocytes                                                                              | IGF-1 (10 <sup>-8</sup> mol/L) | Raf1      | 2.35 | 2min   |
|          | Cardiomyocytes                                                                              | IGF-1 (10 <sup>-8</sup> mol/L) | Raf1      | 2.3  | 5min   |
|          | Cardiomyocytes                                                                              | IGF-1 (10 <sup>-8</sup> mol/L) | Raf1      | 1.18 | 15min  |
|          | Cardiomyocytes                                                                              | IGF-1 (10 <sup>-8</sup> mol/L) | Raf1      | 1    | 30min  |
|          | Cardiomyocytes                                                                              | IGF-1 (10 <sup>-8</sup> mol/L) | ERK12     | 1    | 0min   |
|          | Cardiomyocytes                                                                              | IGF-1 (10 <sup>-8</sup> mol/L) | ERK12     | 2    | 1min   |
|          | Cardiomyocytes                                                                              | IGF-1 (10 <sup>-8</sup> mol/L) | ERK12     | 3    | 2min   |
|          | Cardiomyocytes                                                                              | IGF-1 (10 <sup>-8</sup> mol/L) | ERK12     | 5    | 5min   |
|          | Cardiomyocytes                                                                              | IGF-1 (10 <sup>-8</sup> mol/L) | ERK12     | 4    | 15min  |
|          | Cardiomyocytes                                                                              | IGF-1 (10 <sup>-8</sup> mol/L) | ERK12     | 1.5  | 30min  |
|          | Cardiomyocytes                                                                              | IGF-1 (10 <sup>-8</sup> mol/L) | ERK12     | 1.7  | 60min  |
|          | Cardiomyocytes                                                                              | IGF-1 (10 <sup>-8</sup> mol/L) | STAT1     | 0    | 0min   |

|                |                                |       |      |        |
|----------------|--------------------------------|-------|------|--------|
| Cardiomyocytes | IGF-1 (10 <sup>-8</sup> mol/L) | STAT1 | 1    | 2min   |
| Cardiomyocytes | IGF-1 (10 <sup>-8</sup> mol/L) | STAT1 | 2.5  | 5min   |
| Cardiomyocytes | IGF-1 (10 <sup>-8</sup> mol/L) | STAT1 | 4    | 15min  |
| Cardiomyocytes | IGF-1 (10 <sup>-8</sup> mol/L) | STAT1 | 0    | 30min  |
| Cardiomyocytes | IGF-1 (10 <sup>-8</sup> mol/L) | STAT1 | 0    | 60min  |
| Cardiomyocytes | LIF                            | STAT1 | 1    | 0min   |
| Cardiomyocytes | LIF                            | STAT1 | 1    | 2min   |
| Cardiomyocytes | LIF                            | STAT1 | 2    | 5min   |
| Cardiomyocytes | LIF                            | STAT1 | 2.3  | 15min  |
| Cardiomyocytes | LIF                            | STAT1 | 1    | 30min  |
| Cardiomyocytes | IGF-1 (10 <sup>-8</sup> mol/L) | STAT3 | 0.2  | 0min   |
| Cardiomyocytes | IGF-1 (10 <sup>-8</sup> mol/L) | STAT3 | 1    | 2min   |
| Cardiomyocytes | IGF-1 (10 <sup>-8</sup> mol/L) | STAT3 | 1    | 5min   |
| Cardiomyocytes | IGF-1 (10 <sup>-8</sup> mol/L) | STAT3 | 1    | 15min  |
| Cardiomyocytes | IGF-1 (10 <sup>-8</sup> mol/L) | STAT3 | 1    | 30min  |
| Cardiomyocytes | IGF-1 (10 <sup>-8</sup> mol/L) | STAT3 | 2    | 60min  |
| Cardiomyocytes | IGF-1 (10 <sup>-8</sup> mol/L) | STAT3 | 2    | 90min  |
| Cardiomyocytes | IGF-1 (10 <sup>-8</sup> mol/L) | STAT3 | 2    | 120min |
| Cardiomyocytes | LIF                            | STAT3 | 0    | 0min   |
| Cardiomyocytes | LIF                            | STAT3 | 1    | 2min   |
| Cardiomyocytes | LIF                            | STAT3 | 1.3  | 5min   |
| Cardiomyocytes | LIF                            | STAT3 | 0.5  | 15min  |
| Cardiomyocytes | LIF                            | STAT3 | 0.05 | 30min  |
| Cardiomyocytes | none                           | STAT3 | 0    | 5min   |
| Cardiomyocytes | LIF (1 U/ml)                   | STAT3 | 4    | 5min   |
| Cardiomyocytes | LIF (10 U/ml)                  | STAT3 | 8    | 5min   |
| Cardiomyocytes | LIF (100 U/ml)                 | STAT3 | 90   | 5min   |
| Cardiomyocytes | LIF (1000 U/ml)                | STAT3 | 100  | 5min   |
| Cardiomyocytes | IGF-1 (10 <sup>-9</sup> mol/L) | STAT3 | 9    | 60min  |
| Cardiomyocytes | IGF-1 (10 <sup>-8</sup> mol/L) | STAT3 | 14   | 60min  |

|                                                 |                                          |       |      |                             |
|-------------------------------------------------|------------------------------------------|-------|------|-----------------------------|
| Cardiomyocytes                                  | IGF-1 (10 <sup>-8</sup> mol/L)           | STAT1 | 0    | 0min                        |
| Cardiomyocytes                                  | IGF-1 (10 <sup>-8</sup> mol/L)           | STAT1 | 1    | 5min                        |
| Cardiomyocytes                                  | IGF-1 (10 <sup>-8</sup> mol/L)           | STAT1 | 1    | 15min                       |
| Cardiomyocytes                                  | IGF-1 (10 <sup>-8</sup> mol/L)           | STAT1 | 2    | 30min                       |
| Cardiomyocytes                                  | IGF-1 (10 <sup>-8</sup> mol/L)           | STAT1 | 1    | 60min                       |
| Cardiomyocytes                                  | IGF-1 (10 <sup>-8</sup> mol/L)           | STAT3 | 1    | 0min                        |
| Cardiomyocytes                                  | IGF-1 (10 <sup>-8</sup> mol/L)           | STAT3 | 3.3  | 5min                        |
| Cardiomyocytes                                  | IGF-1 (10 <sup>-8</sup> mol/L)           | STAT3 | 0.6  | 15min                       |
| Cardiomyocytes                                  | IGF-1 (10 <sup>-8</sup> mol/L)           | STAT3 | 0.7  | 30min                       |
| Cardiomyocytes                                  | IGF-1 (10 <sup>-8</sup> mol/L)           | STAT3 | 4    | 60min                       |
| Cardiomyocytes + IGF-1 (10 <sup>-8</sup> mol/L) | none                                     | STAT3 | 1    | 0min                        |
| Cardiomyocytes + IGF-1 (10 <sup>-8</sup> mol/L) | none                                     | STAT3 | 1.3  | 60min                       |
| Cardiomyocytes + IGF-1 (10 <sup>-8</sup> mol/L) | TAK044                                   | STAT3 | 1.5  | 60min                       |
| Cardiomyocytes + IGF-1 (10 <sup>-8</sup> mol/L) | CV11974                                  | STAT3 | 1.3  | 60min                       |
| Murine Cardiomyocytes                           | none                                     | STAT3 | 0    | 60min                       |
| Murine Cardiomyocytes                           | IGF-1 (10 <sup>-8</sup> mol/L)           | STAT3 | 1    | 60min                       |
| Murine Cardiomyocytes                           | IGF-1 (10 <sup>-8</sup> mol/L) + RX435   | STAT3 | 1    | 60min                       |
| Murine Cardiomyocytes                           | none                                     | STAT3 | 0    | 5min                        |
| Murine Cardiomyocytes                           | LIF (1000U/mL)                           | STAT3 | 1    | 5min                        |
| Murine Cardiomyocytes                           | LIF (1000U/mL) + RX435                   | STAT3 | 0.25 | 5min                        |
| Cardiomyocytes                                  | none                                     | STAT3 | 0    | 30min preincu- in inhibitor |
| Cardiomyocytes                                  | IGF-1 (10 <sup>-8</sup> mol/L)           | STAT3 | 1    | 30min preincu- in inhibitor |
| Cardiomyocytes                                  | IGF-1 (10 <sup>-8</sup> mol/L) +BAPTA-AM | STAT3 | 0.05 | 30min preincu- in inhibitor |
| Cardiomyocytes                                  | IGF-1 (10 <sup>-8</sup> mol/L) + EDTA    | STAT3 | 0.96 | 30min preincu- in inhibitor |

|                                                 |                                                                                                                                                                                                                           |                                                |                              |      |                             |
|-------------------------------------------------|---------------------------------------------------------------------------------------------------------------------------------------------------------------------------------------------------------------------------|------------------------------------------------|------------------------------|------|-----------------------------|
|                                                 | Cardiomyocytes                                                                                                                                                                                                            | IGF-1 (10 <sup>-8</sup> mol/L) + KN62          | STAT3                        | 1.04 | 30min preincu- in inhibitor |
|                                                 | Cardiomyocytes                                                                                                                                                                                                            | IGF-1 (10 <sup>-8</sup> mol/L) + PD98059       | STAT3                        | 0.98 | 30min preincu- in inhibitor |
|                                                 | Cardiomyocytes                                                                                                                                                                                                            | IGF-1 (10 <sup>-8</sup> mol/L) + wortmannin    | STAT3                        | 0.84 | 30min preincu- in inhibitor |
|                                                 | Cardiomyocytes                                                                                                                                                                                                            | IGF-1 (10 <sup>-8</sup> mol/L) + Chelerythrine | STAT3                        | 0.02 | 30min preincu- in inhibitor |
|                                                 | Cardiomyocytes                                                                                                                                                                                                            | none                                           | STAT1                        | 1    | 30min preincu- in inhibitor |
|                                                 | Cardiomyocytes                                                                                                                                                                                                            | IGF-1 (10 <sup>-8</sup> mol/L)                 | STAT1                        | 6    | 30min preincu- in inhibitor |
|                                                 | Cardiomyocytes                                                                                                                                                                                                            | IGF-1 (10 <sup>-8</sup> mol/L) +BAPTA-AM       | STAT1                        | 6    | 30min preincu- in inhibitor |
|                                                 | Cardiomyocytes                                                                                                                                                                                                            | IGF-1 (10 <sup>-8</sup> mol/L) + EDTA          | STAT1                        | 6    | 30min preincu- in inhibitor |
|                                                 | Cardiomyocytes                                                                                                                                                                                                            | IGF-1 (10 <sup>-8</sup> mol/L) + KN62          | STAT1                        | 6    | 30min preincu- in inhibitor |
|                                                 | Cardiomyocytes                                                                                                                                                                                                            | none                                           | STAT1                        | 1    | 30min preincu- in inhibitor |
|                                                 | Cardiomyocytes                                                                                                                                                                                                            | IGF-1 (10 <sup>-8</sup> mol/L)                 | STAT1                        | 2.5  | 30min preincu- in inhibitor |
|                                                 | Cardiomyocytes                                                                                                                                                                                                            | IGF-1 (10 <sup>-8</sup> mol/L) + wortmannin    | STAT1                        | 2.6  | 30min preincu- in inhibitor |
|                                                 | Cardiomyocytes                                                                                                                                                                                                            | IGF-1 (10 <sup>-8</sup> mol/L) + PD98059       | STAT1                        | 2.5  | 30min preincu- in inhibitor |
|                                                 | Cardiomyocytes                                                                                                                                                                                                            | none                                           | STAT1                        | 1    | 30min preincu- in inhibitor |
|                                                 | Cardiomyocytes                                                                                                                                                                                                            | IGF-1 (10 <sup>-8</sup> mol/L)                 | STAT1                        | 3    | 30min preincu- in inhibitor |
|                                                 | Cardiomyocytes                                                                                                                                                                                                            | IGF-1 (10 <sup>-8</sup> mol/L) + Chelerythrine | STAT1                        | 2.8  | 30min preincu- in inhibitor |
| 16172266<br>ERK 1/2 AND<br>STAT3 IS OR<br>LOGIC | Role of the Protein Kinase C–Raf-1–MEK-1/2–p44/42 MAPK Signaling Cascade in the Activation of Signal Transducers and Activators of Transcription 1 and 3 and Induction of Cyclooxygenase-2 After Ischemic Preconditioning |                                                |                              |      |                             |
|                                                 | myocardium                                                                                                                                                                                                                | none                                           | p-Ser(338)-Raf1 / total Raf1 | 1    |                             |
|                                                 | myocardium                                                                                                                                                                                                                | ischemic PC                                    | p-Ser(338)-Raf1 / total Raf1 | 1.87 |                             |
|                                                 | myocardium                                                                                                                                                                                                                | ischemic PC + Chelerythrine                    |                              | 1.19 |                             |

|  |                               |                             |                                |             |  |
|--|-------------------------------|-----------------------------|--------------------------------|-------------|--|
|  | myocardium                    | none                        | p-Ser-MEK12 / total MEK12      | 1           |  |
|  | myocardium                    | ischemic PC                 | p-Ser-MEK12 / total MEK12      | 2.44        |  |
|  | myocardium                    | ischemic PC + Chelerythrine |                                | 1.63        |  |
|  | myocardium                    | none                        | p-Tyr(204)-ERK12 / total ERK12 | 1           |  |
|  | myocardium                    | ischemic PC                 | p-Tyr(204)-ERK12 / total ERK12 | 4.05        |  |
|  | myocardium                    | ischemic PC + Chelerythrine |                                | 1.53        |  |
|  | myocardium                    | none                        | p-Ser(727)-STAT1/total STAT1   | 1           |  |
|  | myocardium                    | ischemic PC                 | p-Ser(727)-STAT1/total STAT1   | 1.32        |  |
|  | myocardium + PKC epsilon (KO) | ischemic PC                 | p-Ser(727)-STAT3               | 0.413436693 |  |
|  | myocardium                    | none                        | p-Tyr(705)-STAT3               | 1           |  |
|  | myocardium                    | ischemic PC                 | p-Tyr(705)-STAT3               | 0.988235294 |  |
|  | myocardium + PKC epsilon (KO) | none                        | p-Tyr(705)-STAT3               | 0.72        |  |
|  | myocardium + PKC epsilon (KO) | ischemic PC                 | p-Tyr(705)-STAT3               | 0.981912145 |  |
|  | myocardium                    | none                        | STAT1/3-DNA binding activity   | 1           |  |
|  | myocardium                    | ischemic PC                 | STAT1/3-DNA binding activity   | 5.5         |  |
|  | myocardium + PKC epsilon (KO) | none                        | STAT1/3-DNA binding activity   | 1           |  |
|  | myocardium + PKC epsilon      | ischemic PC                 | STAT1/3-DNA                    | 2.4         |  |

|          |                                                                                                                        |             |                  |       |                           |
|----------|------------------------------------------------------------------------------------------------------------------------|-------------|------------------|-------|---------------------------|
|          | (KO)                                                                                                                   |             | binding activity |       |                           |
|          | myocardium                                                                                                             | none        | COX-2            | 1     |                           |
|          | myocardium                                                                                                             | ischemic PC | COX-2            | 4.5   |                           |
|          | myocardium + PKC epsilon (KO)                                                                                          | none        | COX-2            | 1     |                           |
|          | myocardium + PKC epsilon (KO)                                                                                          | ischemic PC | COX-2            | 2.25  |                           |
| 12494267 | Angiotensin II effects on STAT3 phosphorylation in cardiomyocytes: evidence for Erk-dependent Tyr705 dephosphorylation |             |                  |       |                           |
|          | Neonatal rat cardiomyocytes                                                                                            | AngII       | p-Tyr705-STAT3   | 1     | 0min                      |
|          | Neonatal rat cardiomyocytes                                                                                            | AngII       | p-Tyr705-STAT3   | 0.83  | 2min                      |
|          | Neonatal rat cardiomyocytes                                                                                            | AngII       | p-Tyr705-STAT3   | 0.95  | 5min                      |
|          | Neonatal rat cardiomyocytes                                                                                            | AngII       | p-Tyr705-STAT3   | 0.625 | 15min                     |
|          | Neonatal rat cardiomyocytes                                                                                            | AngII       | p-Tyr705-STAT3   | 0.48  | 30min                     |
|          | Neonatal rat cardiomyocytes                                                                                            | AngII       | p-Tyr705-STAT3   | 0.8   | 60min                     |
|          | Neonatal rat cardiomyocytes                                                                                            | AngII       | p-Tyr705-STAT3   | 1.55  | 90min                     |
|          | Neonatal rat cardiomyocytes                                                                                            | AngII       | p-Tyr705-STAT3   | 1.18  | 120min                    |
|          | Neonatal rat cardiomyocytes                                                                                            | AngII       | p-Ser727-STAT3   | 1     | 0min                      |
|          | Neonatal rat cardiomyocytes                                                                                            | AngII       | p-Ser727-STAT3   | 1.44  | 2min                      |
|          | Neonatal rat cardiomyocytes                                                                                            | AngII       | p-Ser727-STAT3   | 1.75  | 5min                      |
|          | Neonatal rat cardiomyocytes                                                                                            | AngII       | p-Ser727-STAT3   | 1.17  | 15min                     |
|          | Neonatal rat cardiomyocytes                                                                                            | AngII       | p-Ser727-STAT3   | 1.6   | 30min                     |
|          | Neonatal rat cardiomyocytes                                                                                            | AngII       | p-Ser727-STAT3   | 1.375 | 60min                     |
|          | Neonatal rat cardiomyocytes                                                                                            | AngII       | p-Ser727-STAT3   | 1.3   | 90min                     |
|          | Neonatal rat cardiomyocytes                                                                                            | AngII       | p-Ser727-STAT3   | 1.27  | 120min                    |
|          | Neonatal rat cardiomyocytes                                                                                            | none        | p-Tyr705-        | 1     | 30min pret and 30min Ang2 |

|                       |                                                                                                                        |              |                |      |                           |
|-----------------------|------------------------------------------------------------------------------------------------------------------------|--------------|----------------|------|---------------------------|
|                       |                                                                                                                        |              | STAT3          |      |                           |
|                       | Neonatal rat cardiomyocytes                                                                                            | AngII        | p-Tyr705-STAT3 | 0.5  | 30min pret and 30min Ang2 |
|                       | Neonatal rat cardiomyocytes + cycloheximide                                                                            | AngII        | ERK2           | 100  | 5min                      |
|                       | Neonatal rat cardiomyocytes + cycloheximide                                                                            | AngII        | ERK2           | 50   | 30min                     |
|                       | Neonatal rat cardiomyocytes + cycloheximide                                                                            | AngII        | ERK2           | 37.5 | 60min                     |
|                       | Neonatal rat cardiomyocytes + cycloheximide                                                                            | AngII        | ERK2           | 27.5 | 120min                    |
|                       | Neonatal rat cardiomyocytes + 100nM Ang2                                                                               | none         | p-Tyr705-STAT3 | 0.7  |                           |
|                       | Neonatal rat cardiomyocytes + 100nM Ang2                                                                               | PD98059 15uM | p-Tyr705-STAT3 | 1.1  |                           |
|                       | Neonatal rat cardiomyocytes                                                                                            | none         | p-Tyr705-STAT3 | 1    |                           |
|                       | Neonatal rat cardiomyocytes                                                                                            | vanadate     | p-Tyr705-STAT3 | 0.8  |                           |
|                       | Neonatal rat cardiomyocytes + 100nM Ang2                                                                               | none         | p-Tyr705-STAT3 | 0.5  |                           |
|                       | Neonatal rat cardiomyocytes + 100nM Ang2                                                                               | vanadate     | p-Tyr705-STAT3 | 0.9  |                           |
| 10856262<br>Here 2/19 | Cardiotrophin-1 Increases Angiotensinogen mRNA in Rat Cardiac Myocytes Through STAT3 An Autocrine Loop for Hypertrophy |              |                |      |                           |
|                       | NRVM                                                                                                                   | CT1          | STAT1          | 0    | 0min                      |
|                       | NRVM                                                                                                                   | CT1          | STAT1          | 0.02 | 2min                      |
|                       | NRVM                                                                                                                   | CT1          | STAT1          | 1    | 5min                      |
|                       | NRVM                                                                                                                   | CT1          | STAT1          | 5    | 10min                     |
|                       | NRVM                                                                                                                   | CT1          | STAT1          | 6    | 15min                     |
|                       | NRVM                                                                                                                   | CT1          | STAT1          | 2.5  | 30min                     |
|                       | NRVM                                                                                                                   | CT1          | STAT1          | 0    | 60min                     |
|                       | NRVM                                                                                                                   | CT1          | STAT1          | 0    | 120min                    |
| NRVM                  | CT1                                                                                                                    | STAT3        | 0              | 0min |                           |

|          |                                                                                                   |                |                      |       |                          |
|----------|---------------------------------------------------------------------------------------------------|----------------|----------------------|-------|--------------------------|
|          | NRVM                                                                                              | CT1            | STAT3                | 1.5   | 2min                     |
|          | NRVM                                                                                              | CT1            | STAT3                | 3     | 5min                     |
|          | NRVM                                                                                              | CT1            | STAT3                | 4.7   | 10min                    |
|          | NRVM                                                                                              | CT1            | STAT3                | 2.7   | 15min                    |
|          | NRVM                                                                                              | CT1            | STAT3                | 2.5   | 30min                    |
|          | NRVM                                                                                              | CT1            | STAT3                | 0.5   | 60min                    |
|          | NRVM                                                                                              | CT1            | STAT3                | 0.02  | 120min                   |
|          | Cardiomyocytes                                                                                    | CT1            | 3H-Leucine<br>incorp | 16    | losartan30min CT-1 treat |
|          | Cardiomyocytes + Losartan                                                                         | CT1            | 3H-Leucine<br>incorp | 6     | losartan30min CT-1 treat |
|          | Cardiomyocytes                                                                                    | CT1            | Protein content      | 25    | losartan30min CT-1 treat |
|          | Cardiomyocytes + Losartan                                                                         | CT1            | Protein content      | 11.25 | losartan30min CT-1 treat |
|          | Cardiomyocytes                                                                                    | CT1            | Protein / DNA        | 30    | losartan30min CT-1 treat |
|          | Cardiomyocytes + Losartan                                                                         | CT1            | Protein / DNA        | 15.7  | losartan30min CT-1 treat |
| 20518848 | Rac1 activation induces tumour necrosis factor- expression and cardiac dysfunction in endotoxemia |                |                      |       |                          |
|          | Neonetal Cardiomyocytes                                                                           | LPS            | Rac1                 | 0.15  | 0min                     |
|          | Neonetal Cardiomyocytes                                                                           | LPS            | Rac1                 | 0.225 | 5min                     |
|          | Neonetal Cardiomyocytes                                                                           | LPS            | Rac1                 | 0.31  | 15min                    |
|          | Neonetal Cardiomyocytes                                                                           | LPS            | Rac1                 | 0.25  | 30min                    |
|          | Neonetal Cardiomyocytes                                                                           | LPS            | Rac1                 | 0.23  | 60min                    |
|          | Adult male Racf/f mice                                                                            | none           | Rac1                 | 0.47  | 30min                    |
|          | Adult male Racf/f mice                                                                            | LPS            | Rac1                 | 0.95  | 30min                    |
|          | Neonetal Cardiomyocytes                                                                           | none           | PIP3 production      | 2.1   | 30min                    |
|          | Neonetal Cardiomyocytes                                                                           | LPS            | PIP3 production      | 3.3   | 30min                    |
|          | Cardiomyocytes                                                                                    | LPS            | Rac1                 | 0.73  | 30min                    |
|          | Cardiomyocytes                                                                                    | LPS + LY294002 | Rac1                 | 0.43  | 30min                    |
|          | Neonetal Cardiomyocytes                                                                           | none           | ERK12                | 1.3   | 0min                     |
|          | Neonetal Cardiomyocytes                                                                           | LPS            | ERK12                | 2.2   | 15min                    |
|          | Neonetal Cardiomyocytes                                                                           | LPS            | ERK12                | 2.55  | 30min                    |
|          | Neonetal Cardiomyocytes                                                                           | LPS            | ERK12                | 1.55  | 1h                       |



|  |                                                                          |                  |       |      |       |
|--|--------------------------------------------------------------------------|------------------|-------|------|-------|
|  | Neonatal Cardiomyocytes                                                  | LPS              | ERK12 | 1.27 | 2h    |
|  | Cardiomyocytes                                                           | none             | ERK12 | 0.67 | 30min |
|  | Cardiomyocytes                                                           | LPS              | ERK12 | 0.97 | 30min |
|  | Cardiomyocytes                                                           | LPS + LY294002   | ERK12 | 0.7  | 30min |
|  | Cardiomyocytes + Ad-GFP                                                  | none             | ERK12 | 0.6  | 30min |
|  | Cardiomyocytes + Ad-GFP                                                  | LPS              | ERK12 | 0.94 | 30min |
|  | Cardiomyocytes + Ad-Rac1N17                                              | LPS              | ERK12 | 0.73 | 30min |
|  | MEK kinases are regulated by EGF and selectively interact with Rac/Cdc42 |                  |       |      |       |
|  | COS cells                                                                | none             | MEKK1 | 1    |       |
|  | COS cells                                                                | EGF              | MEKK1 | 2.1  |       |
|  | COS cells                                                                | Wortmannin + EGF | MEKK1 | 2.1  |       |
|  | COS cells                                                                | none             | MEKK2 | 1    |       |
|  | COS cells                                                                | EGF              | MEKK2 | 3.9  |       |
|  | COS cells                                                                | Wortmannin + EGF | MEKK2 | 4.1  |       |
|  | COS cells                                                                | none             | JNK   | 1    |       |
|  | COS cells + Delta MEKK1 TF                                               | none             | JNK   | 5    |       |
|  | COS cells + Delta MEKK2 TF                                               | none             | JNK   | 5    |       |
|  | COS cells + Delta MEKK3 TF                                               | none             | JNK   | 5    |       |
|  | COS cells + Delta MEKK4 TF                                               | none             | JNK   | 5    |       |
|  | COS cells                                                                | none             | ERK2  | 1    |       |
|  | COS cells + Delta MEKK1 TF                                               | none             | ERK2  | 3    |       |
|  | COS cells + Delta MEKK2 TF                                               | none             | ERK2  | 2.5  |       |
|  | COS cells + Delta MEKK3 TF                                               | none             | ERK2  | 2.65 |       |
|  | COS cells + Delta MEKK4 TF                                               | none             | ERK2  | 1.6  |       |

9305638  
Here 3/28

| TF                             |                  |      |      |  |
|--------------------------------|------------------|------|------|--|
| COS cells                      | none             | JNK  | 1    |  |
| COS cells                      | EGF              | JNK  | 4.3  |  |
| COS cells                      | Wortmannin + EGF | JNK  | 4.7  |  |
| COS cells                      | none             | ERK2 | 1    |  |
| COS cells                      | EGF              | ERK2 | 5.25 |  |
| COS cells                      | Wortmannin + EGF | ERK2 | 5.35 |  |
| COS cells + empty vector TF    | none             | ERK  | 1    |  |
| COS cells + empty vector TF    | EGF              | ERK  | 4.9  |  |
| COS cells + MEKK1KM expression | EGF              | ERK  | 1.6  |  |
| COS cells + MEKK2KM expression | EGF              | ERK  | 4.5  |  |
| COS cells + MEKK3KM expression | EGF              | ERK  | 4.25 |  |
| COS cells + MEKK4KM expression | EGF              | ERK  | 4.75 |  |
| COS cells + empty vector TF    | none             | JNK  | 1    |  |
| COS cells + empty vector TF    | Cdc42            | JNK  | 11   |  |
| COS cells + MEKK1KM expression | Cdc42            | JNK  | 3.6  |  |
| COS cells + MEKK2KM expression | Cdc42            | JNK  | 11.5 |  |
| COS cells + MEKK3KM expression | Cdc42            | JNK  | 9.3  |  |
| COS cells + MEKK4KM expression | Cdc42            | JNK  | 5.5  |  |
| COS cells + empty vector TF    | none             | JNK  | 1    |  |
| COS cells + empty vector TF    | Rac1             | JNK  | 6.7  |  |
| COS cells + MEKK1KM expression | Rac1             | JNK  | 3    |  |
| COS cells + MEKK2KM expression | Rac1             | JNK  | 7.25 |  |

|          |                                                                                                                                     |                                  |                             |      |       |
|----------|-------------------------------------------------------------------------------------------------------------------------------------|----------------------------------|-----------------------------|------|-------|
|          | COS cells + MEKK3KM expression                                                                                                      | Rac1                             | JNK                         | 6.5  |       |
|          | COS cells + MEKK4KM expression                                                                                                      | Rac1                             | JNK                         | 3    |       |
|          | MEKK2,3 do not bind to the Rho family of GTP-binding proteins.                                                                      |                                  |                             |      |       |
|          | MEKK1 bound to Cdc42 in a GTP dependent manner and di not bind to Rho.                                                              |                                  |                             |      |       |
|          | MEKK4 bound to Cdc42 and Rho in both the GTP and GDP states                                                                         |                                  |                             |      |       |
|          | COS cells + MBP + Cdc42 1ug                                                                                                         | none                             | Rel lev of 32P-GTP labelled | 1    |       |
|          | COS cells + MBP - MEKK1 + Cdc42 1ug                                                                                                 | none                             | Rel lev of 32P-GTP labelled | 7.75 |       |
|          | COS cells + MBP - MEKK3 + Cdc42 1ug                                                                                                 | none                             | Rel lev of 32P-GTP labelled | 1.25 |       |
|          | COS cells + MBP - MEKK4 + Cdc42 1ug                                                                                                 | none                             | Rel lev of 32P-GTP labelled | 9.6  |       |
|          | COS cells + MBP + Rac 1ug                                                                                                           | none                             | Rel lev of 32P-GTP labelled | 1    |       |
|          | COS cells + MBP - MEKK1 + Rac 1ug                                                                                                   | none                             | Rel lev of 32P-GTP labelled | 6.3  |       |
|          | COS cells + MBP - MEKK3 + Rac 1ug                                                                                                   | none                             | Rel lev of 32P-GTP labelled | 1.7  |       |
|          | COS cells + MBP - MEKK4 + Rac 1ug                                                                                                   | none                             | Rel lev of 32P-GTP labelled | 5.27 |       |
| 16934435 | GSK-3 $\beta$ regulation in skeletal muscles by adrenaline and insulin: Evidence that PKA and PKB regulate different pools of GSK-3 |                                  |                             |      |       |
|          | Male wistar rats Soleus muscles                                                                                                     | Insulin (10mU/ml)                | pSer-GSK3beta : %of Insulin | 100  | 30min |
|          | Male wistar rats Soleus muscles                                                                                                     | Insulin (10mU/ml)+ db-cAMP (5mM) | pSer-GSK3beta : %of Insulin | 125  | 30min |
|          | Male wistar rats Soleus muscles                                                                                                     | none                             | pSer-GSK3beta : %of Insulin | 8    | 30min |

|                                 |                                 |                             |       |                          |
|---------------------------------|---------------------------------|-----------------------------|-------|--------------------------|
| Male wistar rats Soleus muscles | db-cAMP (5mM)                   | pSer-GSK3beta : %of Insulin | 25    | 30min                    |
| Male wistar rats Soleus muscles | Insulin                         | pSer-GSK3beta : %of Insulin | 100   | 60min Epac 30min hormone |
| Male wistar rats Soleus muscles | Insulin + EPAC activator (1mM)  | pSer-GSK3beta : %of Insulin | 104   | 60min Epac 30min hormone |
| Male wistar rats Soleus muscles | none                            | pSer-GSK3beta : %of Insulin | 8     | 60min Epac 30min hormone |
| Male wistar rats Soleus muscles | EPAC activator (1mM)            | pSer-GSK3beta : %of Insulin | 12.5  | 60min Epac 30min hormone |
| Male wistar rats Soleus muscles | Insulin                         | pSer-GSK3beta : %of Insulin | 100   | 60min N6 30min Insulin   |
| Male wistar rats Soleus muscles | Insulin + N6-Benzoyl-cAMP (2mM) | pSer-GSK3beta : %of Insulin | 138.5 | 60min N6 30min Insulin   |
| Male wistar rats Soleus muscles | none                            | pSer-GSK3beta : %of Insulin | 5     | 60min N6 30min Insulin   |
| Male wistar rats Soleus muscles | N6-Benzoyl-cAMP (2mM)           | pSer-GSK3beta : %of Insulin | 25    | 60min N6 30min Insulin   |
| Male wistar rats Soleus muscles | none                            | pSer-GSK3beta : %of Insulin | 2     | 60min H89 30min Hormone  |
| Male wistar rats Soleus muscles | H89 (50uM)                      | pSer-GSK3beta : %of Insulin | 2     | 60min H89 30min Hormone  |
| Male wistar rats Soleus muscles | Adrenaline (10 <sup>-6</sup> M) | pSer-GSK3beta : %of Insulin | 12.5  | 60min H89 30min Hormone  |

|         |                                                                                        |                                                                  |                                                        |      |                            |
|---------|----------------------------------------------------------------------------------------|------------------------------------------------------------------|--------------------------------------------------------|------|----------------------------|
|         |                                                                                        |                                                                  | Insulin                                                |      |                            |
|         | Male wistar rats Soleus muscles                                                        | Insulin (10mU/ml) + Adrenaline (10 <sup>-6</sup> M) + Wort (1uM) | pSer-GSK3beta : %of Insulin                            | 12.5 | 10min Wort 30min Hormone   |
|         | Male wistar rats Soleus muscles                                                        | none                                                             | Glycogen synthase 3-site phosphorylation (%of control) | 100  | 30min                      |
|         | Male wistar rats Soleus muscles                                                        | Adrenaline (10 <sup>-6</sup> M)                                  | Glycogen synthase 3-site phosphorylation (%of control) | 125  | 30min                      |
|         | Male wistar rats Soleus muscles                                                        | Insulin (10mU/ml)                                                |                                                        | 56   | 30min                      |
|         | Male wistar rats Soleus muscles                                                        | Insulin (10mU/ml) + Adrenaline (10 <sup>-6</sup> M)              |                                                        | 104  | 30min                      |
|         | Differential Regulation of Glycogen Synthase Kinase-3beta by Protein Kinase C Isotypes |                                                                  |                                                        |      |                            |
| 1324914 | Rabbit skeletal muscle                                                                 | none                                                             | p-GSK3alpha/GSK3alpha                                  | 0.35 | 30min incubation with PKCa |
|         | Rabbit skeletal muscle                                                                 | PKC - alpha                                                      | p-GSK3alpha/GSK3alpha                                  | 0.35 | 30min incubation with PKCa |
|         | Rabbit skeletal muscle                                                                 | none                                                             | p-GSK3beta/GSK3beta                                    | 0.16 | 30min incubation with PKCa |
|         | Rabbit skeletal muscle                                                                 | PKC - alpha                                                      | p-GSK3beta/GSK3beta                                    | 1.75 | 30min incubation with PKCa |
|         | Rabbit skeletal muscle                                                                 | GSK3beta                                                         | p-c-Jun                                                | 1    | PKC 25min c-Jun 2min       |
|         | Rabbit skeletal muscle                                                                 | GSK3beta                                                         | p-c-Jun                                                | 2.5  | PKC 25min c-Jun 5min       |
|         | Rabbit skeletal muscle                                                                 | GSK3beta                                                         | p-c-Jun                                                | 5    | PKC 25min c-Jun 10min      |
|         | Rabbit skeletal muscle                                                                 | GSK3beta + PKC alpha 5units/ml                                   | p-c-Jun                                                | 0.5  | PKC 25min c-Jun 2min       |
|         | Rabbit skeletal muscle                                                                 | GSK3beta + PKC alpha 5units/ml                                   | p-c-Jun                                                | 1.25 | PKC 25min c-Jun 5min       |

|          |                                                                                                                                  |                                   |                                             |                               |                       |            |
|----------|----------------------------------------------------------------------------------------------------------------------------------|-----------------------------------|---------------------------------------------|-------------------------------|-----------------------|------------|
|          | Rabbit skeletal muscle                                                                                                           | GSK3beta + PKC alpha<br>5units/ml | p-c-Jun                                     | 2.5                           | PKC 25min c-Jun 10min |            |
| 11179396 | G protein-mediated inhibitory effect of a nitric oxide donor on the L-type Ca <sup>2+</sup> current in rat ventricular myocytes. |                                   |                                             |                               |                       |            |
|          | RVM                                                                                                                              | none                              | Zero-current<br>Ca <sup>2+</sup> level (nA) | 1.13                          | 0min                  |            |
|          | RVM                                                                                                                              | none                              | Zero-current<br>Ca <sup>2+</sup> level (nA) | 1                             | 2.5min                |            |
|          | RVM                                                                                                                              | ISO 10nM                          | Zero-current<br>Ca <sup>2+</sup> level (nA) | 1                             | 4min                  |            |
|          | RVM                                                                                                                              | ISO 10nM                          | Zero-current<br>Ca <sup>2+</sup> level (nA) | 0.99                          | 5min                  |            |
|          | RVM                                                                                                                              | ISO 10nM                          | Zero-current<br>Ca <sup>2+</sup> level (nA) | 2.1                           | 7.5min                |            |
|          | RVM                                                                                                                              | ISO 10nM + DEANO<br>100uM         | Zero-current<br>Ca <sup>2+</sup> level (nA) | 2.2                           | 10min                 |            |
|          | RVM                                                                                                                              | ISO 10nM + DEANO<br>100uM         | Zero-current<br>Ca <sup>2+</sup> level (nA) | 2.2                           | 12.5min               |            |
|          | RVM                                                                                                                              | ISO 10nM + DEANO<br>100uM         | Zero-current<br>Ca <sup>2+</sup> level (nA) | 1.9                           | 15min                 |            |
|          | COS1 cells + tag-<br>ERK1(2ug)., MEK1(1ug). c-<br>Raf TF(1ug)                                                                    |                                   | CA PKC delta 1ug                            | Mobility shift of<br>tag-ERK1 | 46                    | 24hCulture |
|          | COS1 cells + tag-<br>ERK1(2ug)., MEK1(1ug). c-<br>Raf TF(1ug)                                                                    |                                   | CA PKC delta 3ug                            | Mobility shift of<br>tag-ERK1 | 34                    | 24hCulture |
|          | COS1 cells + tag-<br>ERK1(2ug)., MEK1(1ug). c-<br>Raf TF(1ug)                                                                    |                                   | none                                        | Mobility shift of<br>tag-ERK1 | 8                     | 24hCulture |
|          | COS1 cells + tag-<br>ERK1(2ug)., MEK1(1ug). c-<br>Raf TF(1ug)                                                                    |                                   | CA PKC epsilon 0.1ug                        | Mobility shift of<br>tag-ERK1 | 8                     | 24hCulture |
|          | COS1 cells + tag-<br>ERK1(2ug)., MEK1(1ug). c-<br>Raf TF(1ug)                                                                    |                                   | CA PKC epsilon 0.3ug                        | Mobility shift of<br>tag-ERK1 | 6                     | 24hCulture |

|                                                      |                                               |                            |      |            |
|------------------------------------------------------|-----------------------------------------------|----------------------------|------|------------|
| COS1 cells + tag-ERK1(2ug), MEK1(1ug). c-Raf TF(1ug) | CA PKC epsilon 1ug                            | Mobility shift of tag-ERK1 | 7    | 24hCulture |
| COS1 cells + tag-ERK1(2ug), MEK1(1ug). c-Raf TF(1ug) | CA PKC epsilon 3ug                            | Mobility shift of tag-ERK1 | 4    | 24hCulture |
| COS1 cells + tag- MEK1 TF(5ug)                       | none                                          | Relative MEK activity      | 0.15 | 24hCulture |
| COS1 cells + tag- MEK1 TF(5ug)                       | CA PKC delta (1ug)                            | Relative MEK activity      | 0.17 | 24hCulture |
| COS1 cells + tag- MEK1 TF(5ug)                       | c-Raf(5ug)                                    | Relative MEK activity      | 1    | 24hCulture |
| COS1 cells + tag- MEK1 TF(5ug)                       | CA PKC delta (1ug) + c-Raf(5ug)               | Relative MEK activity      | 5.4  | 24hCulture |
| COS1 cells + tag- MEK1 TF(5ug)                       | CA PKC delta (1ug) + c-Raf(5ug) + dn-Ras(5ug) | Relative MEK activity      | 5    | 24hCulture |
| COS1 cells + tag-ERK1(2ug), MEK1(1ug)                | none                                          | ERK activity               | 1    | 24hCulture |
| COS1 cells + tag-ERK1(2ug), MEK1(1ug)                | PKC delta (1ug)                               | ERK activity               | 2    | 24hCulture |
| COS1 cells + tag-ERK1(2ug), MEK1(1ug)                | CA PKC delta (1ug)                            | ERK activity               | 3.5  | 24hCulture |
| COS1 cells + tag-ERK1(2ug), MEK1(1ug)                | CA PKC delta (1ug) + c-Raf (1ug)              | ERK activity               | 5    | 24hCulture |
| COS1 cells + tag-ERK1(2ug), MEK1(1ug)                | CA PKC delta (1ug) + dn-Ras (2ug)             | ERK activity               | 3    | 24hCulture |

**Supplementray Data Set S2.** Experimental evidence of links in the cardiac signaling network.

| Target of regulation (Abbreviation) | Full name                                   | Related links                                                                                         | Explanation                                                                                                                                                                                                                                                                                       | References (PMID)                                     |
|-------------------------------------|---------------------------------------------|-------------------------------------------------------------------------------------------------------|---------------------------------------------------------------------------------------------------------------------------------------------------------------------------------------------------------------------------------------------------------------------------------------------------|-------------------------------------------------------|
| BAR                                 | $\beta$ -adrenergic receptor                | ISO $\rightarrow$ BAR                                                                                 | Isoproterenol (ISO) activates betaAR                                                                                                                                                                                                                                                              | ISBN-10:<br>0071764011<br>ISBN-13: 978-<br>0071764018 |
| BARp                                | Phosphorylated $\beta$ -adrenergic receptor | PKA $\rightarrow$ (BAR $\rightarrow$ BARp)                                                            | 1) PKA-mediated phosphorylation of the beta1-adrenergic receptor promotes Gs/Gi switching (Figure 4b)<br>2) PKA-mediated phosphorylation of beta2-AR decreases the affinity of the receptor for Gs and increases its affinity for Gi                                                              | 1) 15381255<br>2) 9363896,<br>12063255                |
| BARd                                | Desensitized $\beta$ -adrenergic receptor   | bARKnPI3K $\rightarrow$ (BAR $\rightarrow$ BARd)<br>bARKnPI3K $\rightarrow$ (BARp $\rightarrow$ BARd) | 1) betaARK preferentially phosphorylates the agonist-coupled form of betaAR<br>2) betaARK phosphorylates and thereby inactivates agonist-occupied betaAR                                                                                                                                          | 1) 2165947<br>2) 9349395                              |
| bARK                                | $\beta$ -adrenergic receptor kinase         | Gbg $\rightarrow$ bARK                                                                                | 1) Gbg mediates the membrane targeting of the bARK in response to receptor activation<br>2) Gbg recruit elevated levels of cytosolic GRK2(bARK1) to agonist-stimulated BARs in HF, leading to the chronic BAR desensitization, downregulation and pathological signaling that are hallmarks of HF | 1) 8463335,<br>1325672<br>2) 20576935                 |
| Gs                                  | stimulatory G protein                       | BAR $\rightarrow$ Gs                                                                                  | PKA-mediated phosphorylation of beta2-AR decreases the affinity of the receptor for Gs and increases its affinity for Gi                                                                                                                                                                          | 9363896, 12063255                                     |
| Gi                                  | inhibitory G protein                        | BARp $\rightarrow$ Gi                                                                                 | PKA-mediated phosphorylation of beta2-AR decreases the affinity of the receptor for Gs and increases its affinity for Gi                                                                                                                                                                          | 9363896, 12063255                                     |



|       |                                            |                             |                                                                                                                                                                                                         |                                                         |
|-------|--------------------------------------------|-----------------------------|---------------------------------------------------------------------------------------------------------------------------------------------------------------------------------------------------------|---------------------------------------------------------|
| AC    | Adenylyl cyclase                           | Gs → AC<br>Gi --  AC        | AC is regulated by G proteins (Gs stimulating activity and Gi inhibiting it)                                                                                                                            | ISBN: 0805366245                                        |
| cAMP  | Cyclic adenosine monophosphate             | AC → cAMP<br>PDE34 --  cAMP | activation of Gs-coupled receptors leads to an increase in intracellular cAMP and PKA activation                                                                                                        | 12381255,<br>20530128                                   |
| PKA   | Protein kinase A                           | cAMP → PKA                  | cAMP activates PKA                                                                                                                                                                                      | 20530128                                                |
| epac  | Exchange factor directly activated by cAMP | cAMP → epac                 | Epac1 is a guanine nucleotide exchange factor for Rap1 that is activated by direct binding of cAMP.                                                                                                     | 15550931                                                |
| PDE34 | Phosphodiesterase type 3 and type 4        | PKA → PDE34<br>PKC → PDE34  | 1) PDE4 activity increased two- to threefold in a PKA-dependent manner<br>2) In addition to PKA phosphorylation, human PDE3A enzyme is phosphorylated by PKC                                            | 1) 11606735<br>2) 16153182                              |
| CREB  | cAMP response element-binding protein      | PKA → CREB<br>MSK1 → CREB   | 1) Phenylephrine induces activation of CREB in adult rat cardiac myocytes through MSK1 and PKA signaling pathways (Figure 3A, 3B)<br>2) ET and PE did not affect the transcriptional activation of CREB | 1) 15522277<br>2) 11799083                              |
| αAR   | α-adrenergic receptor                      | PE → αAR                    | PE activates αAR                                                                                                                                                                                        | ISBN-10 :<br>0071764011<br>ISBN-13 : 978-<br>0071764018 |
| Gq    | Gq alpha subunit                           | αAR → Gq<br>RGS4 --  Gq     | The inhibitory effect of ANP on ET-1-stimulated IP3 production was abolished in cells overexpressing RGS4DN (Figure 2A)                                                                                 | 18443239                                                |
| Gbg   | Beta and gamma subunit of G protein        | Gi → Gbg<br>Gq → Gbg        | Gbg is generated simultaneously with activation of Gi or Gq                                                                                                                                             | 10819326                                                |
| PLC   | Phospholipase C                            | Gq → PLC                    | Gq stimulates the membrane-bound phospholipase C beta, which then cleaves PIP2 into two second messengers, IP3 and diacylglycerol (DAG)                                                                 | 21873996                                                |

|      |                                                    |                                         |                                                                                                                                                                                                           |                   |
|------|----------------------------------------------------|-----------------------------------------|-----------------------------------------------------------------------------------------------------------------------------------------------------------------------------------------------------------|-------------------|
| IP3  | Inositol triphosphate                              | PLC → IP3                               | Gq stimulates the membrane-bound phospholipase C beta, which then cleaves PIP2 into two second messengers, IP3 and diacylglycerol (DAG)                                                                   | 21873996          |
| DAG  | Diacylglycerol                                     | PLC → DAG                               | Gq stimulates the membrane-bound phospholipase C beta, which then cleaves PIP2 into two second messengers, IP3 and diacylglycerol (DAG)                                                                   | 21873996          |
| PKC  | Protein kinase C                                   | Ca → PKC<br>DAG → PKC<br>CaN → PKC      | Inhibition of calcineurin with cyclosporine blocks PKCalpha and PKCtheta activation during load induced hypertrophy (Figure 8E)                                                                           | 10788473          |
| TAK1 | Transforming growth factor beta-activated kinase 1 | PKC → TAK1                              | PKC acts by activating TAK1, which leads to ATF-2 activation                                                                                                                                              | 16125722          |
| Ca   | Calcium                                            | PKA → Ca<br>IP3 → Ca<br>PI3K --  Ca     | 1) PKA induces calcium influx from extracellular space while IP3 induces SR calcium release<br>2) PI3K offsets cAMP-mediated positive inotropic effect via inhibiting calcium influx in cardiomyocytes    | 15539636          |
| CaM  | Calmodulin                                         | Ca → CaM                                | Calmodulin (CaM) is a multifunctional intermediate messenger protein that transduces calcium signals by binding calcium ions and then modifying its interaction with various target proteins              | 6313166, 10884684 |
| CaMK | Calcium/calmodulin-dependent protein kinase II     | CaM → CaMK<br>epac → CaMK<br>PKC → CaMK | Epac activation increased CaMK Thr286 phosphorylation and enhanced phosphorylation at CaMK phosphorylation sites on the ryanodine receptor (RyR2) and phospholamban in a PKC-dependent manner (Figure 3B) | 18957419          |
| CaN  | Calcineurin                                        | CaM → CaN                               | Binding of Ca-saturated CaM to CaN activates the catalytic activity of CaN                                                                                                                                | 16009337          |

|      |                     |                                                        |                                                                                                                                                                                                                                                                                                                                                                                                                                                                                                                                                                                                                                                                                                                                                                                                                                                                                                                                                                             |                                                            |
|------|---------------------|--------------------------------------------------------|-----------------------------------------------------------------------------------------------------------------------------------------------------------------------------------------------------------------------------------------------------------------------------------------------------------------------------------------------------------------------------------------------------------------------------------------------------------------------------------------------------------------------------------------------------------------------------------------------------------------------------------------------------------------------------------------------------------------------------------------------------------------------------------------------------------------------------------------------------------------------------------------------------------------------------------------------------------------------------|------------------------------------------------------------|
| HDAC | Histone deacetylase | <p>PKA → HDAC<br/> CaMK --  HDAC<br/> PKC --  HDAC</p> | <p>1) CaMK signaling detach HDACs from MEF2 (Figure 4C)</p> <p>2) PKA phosphorylates HDAC5 and prevents its nuclear export, leading to the inhibition of gene transcription and cardiomyocyte hypertrophy (Figure 3B)</p> <p>3) PKA inhibits nuclear export of HDAC regardless of the status of phosphorylation by CaMK or PKD</p> <p>4) The general serine/threonine protein kinase inhibitor staurosporine and the PKC inhibitor Bis I were effective in blocking the PE-dependent export of HDAC5 (Fig. 3C and D). In contrast, inhibitors of CaMK (KN93), MEK1 (U1026), Rho kinase (Y-27632), diacylglycerol kinase (diacylglycerol kinase inhibitor II), phosphatidylinositol 3-kinase (wortmannin), S6 kinase (rapamycin), glycogen synthase kinase (SB216763), or an inhibitor of protein kinase G, myosin light-chain kinase, and protein kinase A (HA1077) did not significantly affect PE-induced nuclear export of HDAC5.</p> <p>5) PE does not activate PKA</p> | <p>1) 10737771<br/> 2),3) 20716686<br/> 4),5) 15367659</p> |
|------|---------------------|--------------------------------------------------------|-----------------------------------------------------------------------------------------------------------------------------------------------------------------------------------------------------------------------------------------------------------------------------------------------------------------------------------------------------------------------------------------------------------------------------------------------------------------------------------------------------------------------------------------------------------------------------------------------------------------------------------------------------------------------------------------------------------------------------------------------------------------------------------------------------------------------------------------------------------------------------------------------------------------------------------------------------------------------------|------------------------------------------------------------|

|         |                                               |                                                                                       |                                                                                                                                                                                                                                                                                                                                                                                                                                                                                                                                                                                                                                                                                                                                                                                                                                                                                                                                                                                 |                                                                                            |
|---------|-----------------------------------------------|---------------------------------------------------------------------------------------|---------------------------------------------------------------------------------------------------------------------------------------------------------------------------------------------------------------------------------------------------------------------------------------------------------------------------------------------------------------------------------------------------------------------------------------------------------------------------------------------------------------------------------------------------------------------------------------------------------------------------------------------------------------------------------------------------------------------------------------------------------------------------------------------------------------------------------------------------------------------------------------------------------------------------------------------------------------------------------|--------------------------------------------------------------------------------------------|
| NFATnuc | Nuclear factor of activated T-cells (nucleus) | <p>CaN → NFATnuc<br/> JNK --  NFATnuc<br/> p38 --  NFATnuc<br/> GSK3B --  NFATnuc</p> | <p>1) endogenous p38 signaling normally attenuates the efficiency of basal NFATc1 nuclear occupancy (Figure 5c)</p> <p>2) Inhibition of p38 signaling in cardiac myocytes enhances NFAT transcriptional activity</p> <p>3) MKK7/JNK pathway negatively regulates NFATc3 activation (Figure 5B)</p> <p>4) Coinfection of AdNFATc3 and AdCnA with wild-type AdMKK7, AdJNK1 or AdJNK2 significantly reduced the calcineurin-induced NFATc3 mobility shift, indicating partial blockade of nuclear translocation (Figure 5C).</p> <p>5) GSK3beta phosphorylates conserved serines necessary for nuclear export, promotes nuclear exit.</p> <p>6) MEK1 does not affect NFAT nuclear localization.</p> <p>7) In the presence of Ang2 or PE, NFAT is up-regulated. This up-regulation was completely abolished in the presence of CsA or FK506, supporting the conclusion that AngII and PE activate NFAT through a calcineurin-dependent signal transduction pathway (Figure 4H).</p> | <p>1),2) 12750397<br/> 3),4) 14517246<br/> 5) 9072970<br/> 6) 15657416<br/> 7) 9568714</p> |
|---------|-----------------------------------------------|---------------------------------------------------------------------------------------|---------------------------------------------------------------------------------------------------------------------------------------------------------------------------------------------------------------------------------------------------------------------------------------------------------------------------------------------------------------------------------------------------------------------------------------------------------------------------------------------------------------------------------------------------------------------------------------------------------------------------------------------------------------------------------------------------------------------------------------------------------------------------------------------------------------------------------------------------------------------------------------------------------------------------------------------------------------------------------|--------------------------------------------------------------------------------------------|

|         |                                            |                                                       |                                                                                                                                                                                                                                                                                                                                                                                                                                                                                                                                                                                                                                                                                                                                                                                                                                                                                                                                                                             |                                           |
|---------|--------------------------------------------|-------------------------------------------------------|-----------------------------------------------------------------------------------------------------------------------------------------------------------------------------------------------------------------------------------------------------------------------------------------------------------------------------------------------------------------------------------------------------------------------------------------------------------------------------------------------------------------------------------------------------------------------------------------------------------------------------------------------------------------------------------------------------------------------------------------------------------------------------------------------------------------------------------------------------------------------------------------------------------------------------------------------------------------------------|-------------------------------------------|
| NFATact | Activated NFAT                             | cFos → NFATact<br>cJun → NFATact<br>GSK3B --  NFATact | <p>Here, biological meaning of 'NFATact' is the transcriptional activity of NFAT.</p> <p>1) MEK1-ERK1/2 signaling augments NFAT transcriptional activity independent of calcineurin, independent of changes in NFAT nuclear localization, and independent of alterations in NFAT transactivation potential. In contrast, MEK1-ERK1/2 signaling enhances NFAT-dependent gene expression through an indirect mechanism involving induction of cardiac AP-1 activity, which functions as a necessary NFAT interacting partner.</p> <p>2) MEK1-ERK1/2 synergy with NFAT depends, in part, on AP-1 (Figure 5A).</p> <p>3) MEK1-ERK1/2 directly regulates NFAT DNA binding activity.</p> <p>4) MEK1-ERK1/2-induced synergy was blocked by the AP-1 inhibitory mutant protein TAM67. In cardiac myocytes, MEK1-ERK1/2 signaling significantly enhanced AP-1 transcriptional activity, which was blocked with TAM67.</p> <p>5) GSK3B inhibits the DNA binding activity of NFATc</p> | 1), 2), 3), 4)<br>15657416<br>5) 11063740 |
| EGFR    | Epidermal growth factor receptor           | EGF → EGFR                                            | EGF induces EGFR dimerization and activation                                                                                                                                                                                                                                                                                                                                                                                                                                                                                                                                                                                                                                                                                                                                                                                                                                                                                                                                | 14732694                                  |
| Src     | Proto-oncogene tyrosine-protein kinase Src | Gbg → Src<br>CaN → Src<br>FAK → Src                   | <p>1) Calcineurin regulates the ISO-induced activation of ERKs possibly through the Src/Shc/Raf-1 kinase pathway (Fig 7).</p> <p>2) FAK overexpression enhances ras-dependent integrin signaling to ERK2/MAPK through interactions with and activation of c-Src</p> <p>3) LPA stimulation or expression of Gbg subunits resulted in c-</p>                                                                                                                                                                                                                                                                                                                                                                                                                                                                                                                                                                                                                                  | 1) 11435346<br>2) 9148935<br>3) 8702633   |

|         |                                                                             |                                                         |                                                                                                                                                                                                                                                                                                                                                                                                                                                                                                                           |                                                                                                           |
|---------|-----------------------------------------------------------------------------|---------------------------------------------------------|---------------------------------------------------------------------------------------------------------------------------------------------------------------------------------------------------------------------------------------------------------------------------------------------------------------------------------------------------------------------------------------------------------------------------------------------------------------------------------------------------------------------------|-----------------------------------------------------------------------------------------------------------|
|         |                                                                             |                                                         | Src activation, as assessed by increased c-Src autophosphorylation.                                                                                                                                                                                                                                                                                                                                                                                                                                                       |                                                                                                           |
| Shc     | SH2 domain protein C                                                        | Src → Shc<br>EGFR → Shc                                 | <p>1) Phosphorylation of Tyr1148 in EGFR is required for Shc binding.</p> <p>2) Ang2 causes tyrosine phosphorylation of Shc and its association with Grb2 and mSos-1.</p> <p>3) Overexpression of wild-type or constitutively active mutant c-Src, but not kinase inactive mutant c-Src, lead to increased tyrosine kinase activity in Shc immunoprecipitates.</p>                                                                                                                                                        | <p>1) 16687399<br/>2) 8631299<br/>3) 8702633</p>                                                          |
| Grb2act | Activated growth factor receptor-bound protein 2                            | EGFR → Grb2act<br>Shc → Grb2act                         | <p>1) In beta-adrenergic cardiac hypertrophy, the Akt-GSK3b pathway, rather than the mitogen-activated protein kinase pathway, plays an essential role in transcription of atrial natriuretic factor (ANF).</p> <p>2) Grb2(SH2 domain) associates with activated EGFR either directly or through tyrosyl-phosphorylated Shc.</p>                                                                                                                                                                                          | <p>1) 11382772<br/>2) 16687399,<br/>11057895</p>                                                          |
| Grb2Sos | growth factor receptor-bound protein 2(Grb2)- Son of Sevenless(Sos) complex | Grb2act → Grb2Sos<br>Shc → Grb2Sos<br>ERK12 --  Grb2Sos | <p>1) Grb2(SH3 domain) associates with the cytoplasmic guanine nucleotide exchange factor SOS.</p> <p>2) Inhibitory feedback phosphorylation of SOS by ERK provides a mechanism for the inhibition of Ras signaling.</p> <p>3) SHP2 that binds to Gab1 was reported to be a positive regulator of the MAPK pathway.</p> <p>4) Ang2 stimulates association of mSos-1 with Shc and translocates mSos-1 to the membrane fraction.</p> <p>5) SHP2 contributes to the Ras activation in the same degree as EGF (Figure 5C)</p> | <p>1) 9865697,<br/>7781603<br/>2) 7829473,<br/>7592690<br/>3) 16687399<br/>4) 8631299<br/>5) 11134009</p> |

|           |                                                                                              |                                            |                                                                                                                                                                                                                                                                                                                                                                                                                                                                                                                                                                                                  |                                                           |
|-----------|----------------------------------------------------------------------------------------------|--------------------------------------------|--------------------------------------------------------------------------------------------------------------------------------------------------------------------------------------------------------------------------------------------------------------------------------------------------------------------------------------------------------------------------------------------------------------------------------------------------------------------------------------------------------------------------------------------------------------------------------------------------|-----------------------------------------------------------|
| Grb2&Gab1 | growth factor receptor-bound protein 2(Grb2)-Grb2-associated binding protein 1(Gab1) complex | Grb2act → Grb2nGab1<br>ERK12 --  Grb2nGab1 | 1) Gab(PH domain) binds to Grb2(SH3 domain), The association of Gab1 with EGFR is thought to occur predominantly via Grb2                                                                                                                                                                                                                                                                                                                                                                                                                                                                        | 16687399                                                  |
| Ras       | rat sarcoma viral oncogene homolog                                                           | Grb2Sos → Ras                              | EGF-induced recruitment of the SOS-Grb2 complex to the plasma membrane is critical for the initiation of the MAPK/ERK pathway                                                                                                                                                                                                                                                                                                                                                                                                                                                                    | 8479536                                                   |
| Rac       | Ras-Related C3 Botulinum Toxin Substrate                                                     | Ras → Rac<br>EGFR → Rac                    | The pattern of Ras-activation and Rac-activation is significantly different                                                                                                                                                                                                                                                                                                                                                                                                                                                                                                                      | 9314533                                                   |
| Raf1      | Raf-1 Proto-Oncogene, Serine/Threonine Kinase                                                | Ras → Raf1<br>PKC → Raf1<br>PKA --  Raf1   | 1) Active Ras can induce MAP kinase activation in cardiac muscle cells. In addition, phenylephrine-induced activation of the MAP kinases requires Ras activity since a dominant negative Ras mutant (Ala15Ras) and a Ras-blocking, Raf mutant (C4B Raf) prevent activation of the MAP kinase Erk2 by phenylephrine.<br>2) Calcineurin activates PKC isoforms in vivo.<br>3) PKA can weaken the interaction of Raf-1 with Ras.<br>4) PKA can inhibit Raf1 function directly via phosphorylation of the Raf1 kinase domain.<br>5) PKA and PKC synergistically activate the Raf-1 in cardiomyocyte. | 1) 7802678<br>2) 10788473<br>3), 4) 7935389<br>5) 9299372 |
| MEKK1     | Mitogen-Activated Protein Kinase Kinase Kinase 1                                             | Rac → MEKK1                                | The pattern of MEKK-activation is significantly different from the pattern of Ras- or Rac- activation                                                                                                                                                                                                                                                                                                                                                                                                                                                                                            | 9314533                                                   |
| MEKK234   | Mitogen-Activated Protein Kinase                                                             | Rac → MEKK234                              | Rac is required as an interactive binding motifs                                                                                                                                                                                                                                                                                                                                                                                                                                                                                                                                                 | 10799501                                                  |

|        |                                                   |                                |                                                                                                                                                                                                                                                                       |                                       |
|--------|---------------------------------------------------|--------------------------------|-----------------------------------------------------------------------------------------------------------------------------------------------------------------------------------------------------------------------------------------------------------------------|---------------------------------------|
|        | Kinase Kinase 2, 3, 4                             |                                |                                                                                                                                                                                                                                                                       |                                       |
| MEKK11 | Mitogen-Activated Protein Kinase Kinase Kinase 11 | Rac → MEKK11                   | Rac is required as an interactive binding motifs                                                                                                                                                                                                                      | 10799501                              |
| MEK12  | Mitogen-Activated Protein Kinase Kinase 1, 2      | Raf1 → MEK12                   | 1) Raf1 serves primarily as an ERK activator<br>2) Activated Rac had no effect on ERK in the cardiac cells<br>3) Only expression of a kinase-inactive inhibitory mutant of MEKK1 and not the kinase-inactive mutants of MEKK2, 3, or 4 inhibit ERK activation by EGF  | 1),2) 9314533<br>3) 9305638           |
| MEK4   | Mitogen-Activated Protein Kinase Kinase 4         | MEKK1 → MEK4<br>MEKK23 → MEK4  | MEK4 is activated by MEKK1                                                                                                                                                                                                                                            | 9405400                               |
| MEK7   | Mitogen-Activated Protein Kinase Kinase 7         | MEKK23 → MEK7<br>MEKK11 → MEK7 | MEKK23 directly activates MEK7                                                                                                                                                                                                                                        | 10347227                              |
| MEK36  | Mitogen-Activated Protein Kinase Kinase 3, 6      | MEKK11 → MEK36<br>TAK1 → MEK36 | 1) TAK1 activates MEK36<br>2) Activated Rac had no effect on p38                                                                                                                                                                                                      | 1) 14681216<br>2) 9314533             |
| ERK12  | Mitogen-activated protein kinase 3, 1             | Gbg → ERK12<br>MEK12 → ERK12   | 1) MEK12 phosphorylate ERK12 at the conserved TEY motif (amino acids 183-185 in mouse Erk2) and thereby activate ERK12<br>2) ERK(Thr188) phosphorylation was shown to be triggered by the association of Gq-derived Gbetagamma subunits with activated ERK12 (Fig 4B) | 1) 7601337,<br>1628739<br>2) 22843704 |



|                |                                                                                                                                             |                                         |                                                                                                                                                                                                                                 |                                                         |
|----------------|---------------------------------------------------------------------------------------------------------------------------------------------|-----------------------------------------|---------------------------------------------------------------------------------------------------------------------------------------------------------------------------------------------------------------------------------|---------------------------------------------------------|
| JNK            | Mitogen-Activated Protein Kinase 8                                                                                                          | MEK4 → JNK<br>MEK7 → JNK<br>CaN → JNK   | 1) Inhibition of calcineurin with cyclosporine prevents activation of JNK (p54) during load induced hypertrophy (Figure 7)<br>2) JNK is activated through MEK4                                                                  | 1) 10788473<br>2) 16125722                              |
| p38            | Mitogen-Activated Protein Kinase 14                                                                                                         | MEK4 → p38<br>MEK36 → p38<br>RhoA → p38 | 1) MKK6 stimulates MEF2 by activating p38 MAPK (Figure 1C)<br>2) MEK4 partially contributes to the activation of p38<br>3) RhoA was shown to be a potent activator of the p38 MAPKs<br>4) p38 is activated through MKK3 or MKK6 | 1) 10737771<br>2) 9314533<br>3) 11641276<br>4) 16125722 |
| PI3Kret        | Recruited phosphatidylinositol-4,5-bisphosphate 3-kinase                                                                                    | Grb2 → PI3K<br>bARK → PI3K              | PI3K is recruited to receptor                                                                                                                                                                                                   | 16687399, 1325672                                       |
| Grb2&Gab1&PI3K | growth factor receptor-bound protein 2(Grb2)-Grb2-associated binding protein 1(Gab1)-phosphatidylinositol-4,5-bisphosphate 3-kinase complex | Grb2 → PI3K                             | Gab1-mediated recruitment of p85 results in PI3K activation and the production of PIP3 in the plasma membrane                                                                                                                   | 16687399                                                |
| bARKnPI3K      | β-adrenergic receptor kinase-phosphatidylinositol-4,5-bisphosphate 3-kinase complex                                                         | bARK → PI3K                             | 1) From Figure 1 of 15539636, we deduced the relative strength of recruitment of PI3K to each receptor<br>2) betaARK as well as Gbetagamma signaling is involved in beta1-AR-mediated PI3K activation                           | 15539636                                                |
| Akt            | V-akt murine thymoma viral oncogene                                                                                                         | PI3K → Akt                              | Akt is activated when binds to PIP3 via its PH domain.                                                                                                                                                                          | 15718470,<br>16962653                                   |

|       |                                                |                                                                |                                                                                                                                                                                                                                                                                                                                                                                                                                                                                                                                 |                                                          |
|-------|------------------------------------------------|----------------------------------------------------------------|---------------------------------------------------------------------------------------------------------------------------------------------------------------------------------------------------------------------------------------------------------------------------------------------------------------------------------------------------------------------------------------------------------------------------------------------------------------------------------------------------------------------------------|----------------------------------------------------------|
| GSK3B | Glycogen synthase kinase 3 beta                | Akt --  GSK3B                                                  | Akt reverses GSK3B-induced inhibition of GATA4 in cardiac myocytes                                                                                                                                                                                                                                                                                                                                                                                                                                                              | 11382772                                                 |
| MEF2  | Myocyte enhancer factor 2                      | p38 → MEF2<br>ERK5 → MEF2<br>HDAC --  MEF2                     | 1) MEF2 mediates synergistic transcriptional responses to the CaMK and MAPK signaling pathways MAPKs, which activate MEF2 by phosphorylation of the transcriptional activation domain, maximally stimulate MEF2 activity only when repression by HDACs is relieved by CaMK signaling to the DNA-binding domain (Figure 4A)<br><br>2) BMK1/ERK5 regulates serum-induced early gene expression through transcriptional factor MEF2C (Figure 6B)                                                                                   | 1) 10737771<br>2) 9384584                                |
| GATA4 | GATA binding protein 4                         | ERK12 → GATA4<br>p38 → GATA4<br>PCK → GATA4<br>GSK3B --  GATA4 | 1) PKC was shown to enhance activity of GATA4 in cell culture. Mutation of the PKC recognition motif (S419A S420A) in GATA4 reduced transcriptional activity of GATA4 more than 50%<br><br>2) Only dominant-negative MEK1 blocked PE-induced GATA4 phosphorylation (Figure 2C)<br><br>3) GATA4 activity is positively regulated by p38 MAPK<br><br>4) GSK3B directly phosphorylates GATA4 and thereby decreases basal and betaAR-stimulated GATA4 expression in the nucleus by activating the nuclear export system (Figure 5B) | 1) 16260600<br>2) 11585926<br>3) 11641276<br>4) 11382772 |
| cFos  | FBJ murine osteosarcoma viral oncogene homolog | ERK12 → cFos                                                   | MEK1-ERK1/2 signaling significantly enhanced AP-1 transcriptional activity                                                                                                                                                                                                                                                                                                                                                                                                                                                      | 15657416                                                 |
| cJun  | Jun proto-oncogene                             | JNK → cJun<br>p38 → cJun                                       | In contrast to c-Fos, c-Jun has a basal level of transcription that likely represents its function in basal cellular homeostasis.                                                                                                                                                                                                                                                                                                                                                                                               | 15795322                                                 |

|      |                                                   |                             |                                                                                                                                                                                                                                     |                            |
|------|---------------------------------------------------|-----------------------------|-------------------------------------------------------------------------------------------------------------------------------------------------------------------------------------------------------------------------------------|----------------------------|
| AP1  | Activator protein 1                               | cFos → AP1<br>cJun → AP1    | 1) AP-1 is homodimers or heterodimers of c-Fos and c-Jun<br>2) c-fos, c-fos dimer cannot function as an AP-1<br>3) DNJun inhibited the increase in the AP1 activation, 3H-Phe incorporation, cell size enhancement due to ET and PE | 1) 15795322<br>2) 11799083 |
| MSK1 | Ribosomal protein S6 kinase, 90kDa, polypeptide 5 | ERK12 → MSK1<br>p38 → MSK1  | MSK1 is a substrate of both ERK12 and p38.                                                                                                                                                                                          | 16806820                   |
| NOS  | Nitric oxide synthase                             | Akt → NOS                   | PI3K/Akt-NO signal pathway is involved in cardiomyocyte hypertrophy                                                                                                                                                                 | 26045205                   |
| sGC  | Sarcoglycan                                       | NOS → sGC                   | NO activates sGC                                                                                                                                                                                                                    | 17700722                   |
| cGMP | Cyclic guanosine monophosphate                    | sGC → cGMP<br>PDE5 --  cGMP | 1) sGC generates cGMP<br>2) PDE5 degrades cGMP and regulates the intracellular level of cGMP                                                                                                                                        | 1) 17700722<br>2) 10385692 |
| PKG  | Protein kinase G                                  | cGMP → PKG<br>PDE5 --  PKG  | 1) cGMP activates PKG<br>2) PKG is activated by PDE5 inhibition                                                                                                                                                                     | 1) 17700722<br>2) 20177073 |
| PDE5 | Phosphodiesterase 5                               | PKG → PDE5                  | activation of PKG lead to phosphorylation and activation of PDE5                                                                                                                                                                    | 11723116                   |
| RGS4 | Regulator of G-protein signaling 4                | PKG → RGS4                  | activation of PKG lead to phosphorylation of RGS4, and association of RGS4 and Gq                                                                                                                                                   | 18443239                   |

**Supplementary Data Set S3.** Results of the distribution perturbation analyses for apoptosis in the cardiac signaling network.

1a) Result of one-distribution perturbation analysis for apoptosis when each response function was separately applied

|                   |      | Lin    |         | Hill   |         | Sat    |         | Acc    |         |
|-------------------|------|--------|---------|--------|---------|--------|---------|--------|---------|
|                   |      | Effect | p-value | Effect | p-value | Effect | p-value | Effect | p-value |
| Threshold: top 5% | pm1  | 1.029  | 0.370   | 0.999  | 0.214   | 1.020  | 0.462   | 1.021  | 0.968   |
|                   | pm2  | 0.996  | 0.617   | 0.999  | 0.638   | 0.995  | 0.798   | 1.003  | 0.640   |
|                   | pm3  | 0.989  | 0.756   | 1.024  | 0.627   | 1.002  | 0.210   | 1.009  | 0.355   |
|                   | pm4  | 1.005  | 0.820   | 1.098  | 0.353   | 1.009  | 0.896   | 1.000  | 0.913   |
|                   | pm5  | 0.998  | 0.972   | 0.995  | 0.530   | 0.998  | 0.337   | 1.001  | 0.739   |
|                   | pm6  | 1.021  | 0.940   | 1.000  | 0.786   | 1.109  | 0.044   | 1.014  | 0.645   |
|                   | pm7  | 2.069  | <0.001  | 1.646  | <0.001  | 2.483  | <0.001  | 1.871  | <0.001  |
|                   | pm8  | 0.999  | 0.559   | 0.995  | 0.444   | 0.998  | 0.928   | 0.997  | 0.650   |
|                   | pm9  | 1.031  | 0.775   | 1.053  | 0.593   | 1.020  | 0.985   | 1.031  | 0.734   |
|                   | pm10 | 2.140  | <0.001  | 1.905  | <0.001  | 1.933  | <0.001  | 2.221  | <0.001  |
|                   | pm11 | 1.001  | 0.476   | 1.010  | 0.846   | 0.994  | 0.105   | 1.020  | 0.729   |
|                   | pm12 | 1.154  | 0.024   | 1.236  | <0.001  | 1.169  | 0.021   | 1.254  | <0.001  |
|                   | pm13 | 1.007  | 0.549   | 1.015  | 0.609   | 1.003  | 0.158   | 1.009  | 0.727   |
|                   | pm14 | 0.998  | 0.420   | 1.006  | 0.912   | 0.999  | 0.578   | 1.007  | 0.127   |
|                   | pm15 | 1.002  | 0.210   | 1.007  | 0.587   | 1.005  | 0.750   | 1.007  | 0.296   |
|                   | pm16 | 0.995  | 0.701   | 1.004  | 0.774   | 0.997  | 0.947   | 1.004  | 0.952   |
|                   | pm17 | 1.001  | 0.931   | 1.004  | 0.885   | 0.996  | 0.417   | 1.004  | 0.118   |
|                   | pm18 | 0.996  | 0.468   | 0.998  | 0.420   | 0.999  | 0.980   | 1.001  | 0.492   |
|                   | pm19 | 0.997  | 0.532   | 0.999  | 0.322   | 0.999  | 0.661   | 1.001  | 0.395   |
|                   | pm20 | 1.001  | 0.303   | 1.007  | 0.190   | 0.996  | 0.540   | 1.005  | 0.395   |

|                    |      |        |         |        |         |        |         |        |         |       |
|--------------------|------|--------|---------|--------|---------|--------|---------|--------|---------|-------|
|                    | pm21 | 1.163  | 0.023   | 1.273  | <0.001  | 1.484  | <0.001  | 1.167  | 0.021   |       |
|                    | pm22 | 1.073  | 0.667   | 1.156  | 0.026   | 1.040  | 0.644   | 1.053  | 0.890   |       |
|                    | pm23 | 1.087  | 0.726   | 1.331  | <0.001  | 1.064  | 0.550   | 1.059  | 0.314   |       |
|                    | pm24 | 0.997  | 0.290   | 1.018  | 0.748   | 0.998  | 0.810   | 1.000  | 0.645   |       |
|                    | pm25 | 0.997  | 0.740   | 1.001  | 0.802   | 0.999  | 0.374   | 1.001  | 0.272   |       |
|                    | pm26 | 0.997  | 0.844   | 1.001  | 0.447   | 0.999  | 0.989   | 1.001  | 0.933   |       |
|                    | pm27 | 1.021  | 0.867   | 1.041  | 0.972   | 1.020  | 0.177   | 1.008  | 0.131   |       |
|                    | pm28 | 1.335  | <0.001  | 1.162  | 0.027   | 1.162  | 0.021   | 1.450  | <0.001  |       |
|                    | pm29 | 1.033  | 0.148   | 1.190  | 0.056   | 0.995  | 0.395   | 1.112  | 0.603   |       |
|                    | pm30 | 0.918  | 0.492   | 0.851  | 0.023   | 0.945  | 0.521   | 0.873  | 0.028   |       |
|                    | pm31 | 1.016  | 0.652   | 1.042  | 0.239   | 1.019  | 0.633   | 1.013  | 0.539   |       |
|                    | pm32 | 0.998  | 0.439   | 1.124  | 0.033   | 1.000  | 0.733   | 1.051  | 0.749   |       |
|                    | pm33 | 0.997  | 0.158   | 1.002  | 0.959   | 0.999  | 0.715   | 1.001  | 0.315   |       |
|                    | pm34 | 1.003  | 0.383   | 1.007  | 0.311   | 1.002  | 0.375   | 1.004  | 0.488   |       |
|                    | pm35 | 1.001  | 0.555   | 1.001  | 0.334   | 1.012  | 0.779   | 1.008  | 0.625   |       |
|                    | pm36 | 0.996  | 0.559   | 0.998  | 0.927   | 0.999  | 0.462   | 1.001  | 0.438   |       |
|                    | pm37 | 0.994  | 0.281   | 1.008  | 0.533   | 0.999  | 0.846   | 1.008  | 0.252   |       |
| Threshold: top 10% |      | Lin    |         | Hill   |         | Sat    |         | Acc    |         |       |
|                    |      | Effect | p-value | Effect | p-value | Effect | p-value | Effect | p-value |       |
|                    |      | pm1    | 1.025   | 0.752  | 0.999   | 0.153  | 1.018   | 0.471  | 1.021   | 0.934 |
|                    |      | pm2    | 0.995   | 0.941  | 0.999   | 0.731  | 0.995   | 0.590  | 1.002   | 0.981 |
|                    |      | pm3    | 0.991   | 0.409  | 1.022   | 0.148  | 1.002   | 0.565  | 1.008   | 0.480 |
|                    |      | pm4    | 1.006   | 0.308  | 1.091   | 0.168  | 1.007   | 0.934  | 1.000   | 0.991 |
|                    |      | pm5    | 0.998   | 0.375  | 0.996   | 0.899  | 0.998   | 0.146  | 1.001   | 0.418 |
|                    |      | pm6    | 1.016   | 0.668  | 1.000   | 0.177  | 1.116   | 0.042  | 1.013   | 0.948 |

|      |       |        |       |        |       |        |       |        |
|------|-------|--------|-------|--------|-------|--------|-------|--------|
| pm7  | 2.034 | <0.001 | 1.582 | <0.001 | 2.310 | <0.001 | 1.690 | <0.001 |
| pm8  | 0.999 | 0.194  | 0.995 | 0.315  | 0.998 | 0.651  | 0.997 | 0.723  |
| pm9  | 1.034 | 0.154  | 1.055 | 0.769  | 1.022 | 0.529  | 1.027 | 0.434  |
| pm10 | 2.130 | <0.001 | 1.769 | <0.001 | 1.906 | <0.001 | 2.271 | <0.001 |
| pm11 | 1.001 | 0.368  | 1.009 | 0.250  | 0.994 | 0.967  | 1.017 | 0.756  |
| pm12 | 1.123 | 0.046  | 1.206 | <0.001 | 1.122 | 0.045  | 1.282 | <0.001 |
| pm13 | 1.007 | 0.767  | 1.014 | 0.239  | 1.003 | 0.944  | 1.008 | 0.897  |
| pm14 | 0.998 | 0.306  | 1.006 | 0.888  | 0.999 | 0.184  | 1.006 | 0.446  |
| pm15 | 1.002 | 0.537  | 1.008 | 0.814  | 1.004 | 0.376  | 1.008 | 0.809  |
| pm16 | 0.995 | 0.421  | 1.003 | 0.210  | 0.998 | 0.761  | 1.004 | 0.956  |
| pm17 | 1.001 | 0.202  | 1.004 | 0.804  | 0.996 | 0.342  | 1.003 | 0.198  |
| pm18 | 0.997 | 0.665  | 0.998 | 0.257  | 0.999 | 0.622  | 1.001 | 0.133  |
| pm19 | 0.997 | 0.633  | 0.999 | 0.189  | 0.999 | 0.744  | 1.001 | 0.602  |
| pm20 | 1.001 | 0.346  | 1.007 | 0.722  | 0.996 | 0.168  | 1.004 | 0.191  |
| pm21 | 1.147 | 0.022  | 1.315 | <0.001 | 1.428 | <0.001 | 1.151 | 0.024  |
| pm22 | 1.074 | 0.497  | 1.135 | 0.065  | 1.050 | 0.403  | 1.055 | 0.496  |
| pm23 | 1.092 | 0.737  | 1.285 | <0.001 | 1.054 | 0.361  | 1.056 | 0.941  |
| pm24 | 0.997 | 0.859  | 1.017 | 0.114  | 0.998 | 0.756  | 1.000 | 0.906  |
| pm25 | 0.997 | 0.150  | 1.001 | 0.499  | 0.999 | 0.842  | 1.001 | 0.110  |
| pm26 | 0.997 | 0.127  | 1.001 | 0.230  | 0.999 | 0.533  | 1.001 | 0.737  |
| pm27 | 1.021 | 0.988  | 1.039 | 0.334  | 1.017 | 0.718  | 1.007 | 0.678  |
| pm28 | 1.319 | <0.001 | 1.137 | 0.042  | 1.143 | 0.027  | 1.422 | <0.001 |
| pm29 | 1.035 | 0.346  | 1.189 | 0.016  | 0.996 | 0.347  | 1.087 | 0.401  |
| pm30 | 0.921 | 0.655  | 0.875 | 0.021  | 0.957 | 0.231  | 0.898 | 0.038  |
| pm31 | 1.015 | 0.531  | 1.046 | 0.540  | 1.020 | 0.593  | 1.011 | 0.679  |
| pm32 | 0.998 | 0.612  | 1.103 | 0.205  | 1.000 | 0.823  | 1.049 | 0.694  |

|                    |      |        |         |        |         |        |         |        |         |        |
|--------------------|------|--------|---------|--------|---------|--------|---------|--------|---------|--------|
|                    | pm33 | 0.997  | 0.962   | 1.002  | 0.876   | 0.999  | 0.667   | 1.001  | 0.313   |        |
|                    | pm34 | 1.003  | 0.461   | 1.006  | 0.535   | 1.002  | 0.923   | 1.003  | 0.239   |        |
|                    | pm35 | 1.001  | 0.596   | 1.001  | 0.536   | 1.010  | 0.931   | 1.008  | 0.115   |        |
|                    | pm36 | 0.997  | 0.838   | 0.998  | 0.744   | 0.999  | 0.397   | 1.001  | 0.427   |        |
|                    | pm37 | 0.993  | 0.389   | 1.007  | 0.292   | 0.999  | 0.752   | 1.007  | 0.237   |        |
| Threshold: top 20% |      | Lin    |         | Hill   |         | Sat    |         | Acc    |         |        |
|                    |      | Effect | p-value | Effect | p-value | Effect | p-value | Effect | p-value |        |
|                    |      | pm1    | 1.021   | 0.319  | 0.999   | 0.288  | 1.014   | 0.134  | 1.019   | 0.253  |
|                    |      | pm2    | 0.996   | 0.150  | 0.999   | 0.933  | 0.996   | 0.436  | 1.002   | 0.710  |
|                    |      | pm3    | 0.992   | 0.245  | 1.019   | 0.130  | 1.002   | 0.459  | 1.006   | 0.934  |
|                    |      | pm4    | 1.004   | 0.607  | 1.074   | 0.821  | 1.006   | 0.189  | 1.000   | 0.350  |
|                    |      | pm5    | 0.998   | 0.352  | 0.997   | 0.119  | 0.998   | 0.283  | 1.001   | 0.737  |
|                    |      | pm6    | 1.014   | 0.802  | 1.000   | 0.655  | 1.096   | 0.586  | 1.011   | 0.355  |
|                    |      | pm7    | 1.907   | <0.001 | 1.494   | <0.001 | 2.074   | <0.001 | 1.583   | <0.001 |
|                    |      | pm8    | 0.999   | 0.551  | 0.995   | 0.113  | 0.998   | 0.772  | 0.997   | 0.631  |
|                    |      | pm9    | 1.029   | 0.814  | 1.045   | 0.992  | 1.018   | 0.826  | 1.021   | 0.370  |
|                    |      | pm10   | 2.002   | <0.001 | 1.639   | <0.001 | 1.901   | <0.001 | 2.127   | <0.001 |
|                    |      | pm11   | 1.001   | 0.291  | 1.007   | 0.109  | 0.995   | 0.189  | 1.015   | 0.633  |
|                    |      | pm12   | 1.122   | 0.033  | 1.161   | 0.014  | 1.125   | 0.038  | 1.227   | <0.001 |
|                    |      | pm13   | 1.005   | 0.346  | 1.012   | 0.747  | 1.002   | 0.741  | 1.007   | 0.888  |
|                    |      | pm14   | 0.998   | 0.671  | 1.005   | 0.361  | 0.999   | 0.601  | 1.005   | 0.754  |
|                    |      | pm15   | 1.002   | 0.751  | 1.006   | 0.420  | 1.003   | 0.316  | 1.007   | 0.159  |
|                    |      | pm16   | 0.996   | 0.484  | 1.003   | 0.544  | 0.998   | 0.355  | 1.004   | 0.509  |
|                    |      | pm17   | 1.001   | 0.247  | 1.003   | 0.727  | 0.997   | 0.376  | 1.003   | 0.228  |
|                    | pm18 | 0.998  | 0.928   | 0.998  | 0.913   | 0.999  | 0.623   | 1.000  | 0.321   |        |

|      |       |        |       |        |       |        |       |        |
|------|-------|--------|-------|--------|-------|--------|-------|--------|
| pm19 | 0.998 | 0.263  | 0.999 | 0.740  | 1.000 | 0.749  | 1.000 | 0.634  |
| pm20 | 1.001 | 0.807  | 1.006 | 0.522  | 0.997 | 0.961  | 1.004 | 0.669  |
| pm21 | 1.117 | 0.038  | 1.251 | <0.001 | 1.338 | <0.001 | 1.147 | 0.035  |
| pm22 | 1.066 | 0.122  | 1.119 | 0.051  | 1.035 | 0.873  | 1.048 | 0.932  |
| pm23 | 1.081 | 0.934  | 1.232 | <0.001 | 1.039 | 0.854  | 1.053 | 0.483  |
| pm24 | 0.998 | 0.648  | 1.014 | 0.417  | 0.998 | 0.134  | 1.000 | 0.979  |
| pm25 | 0.997 | 0.588  | 1.001 | 0.277  | 0.999 | 0.665  | 1.000 | 0.872  |
| pm26 | 0.998 | 0.289  | 1.001 | 0.882  | 0.999 | 0.278  | 1.000 | 0.314  |
| pm27 | 1.017 | 0.107  | 1.035 | 0.402  | 1.014 | 0.363  | 1.006 | 0.990  |
| pm28 | 1.249 | <0.001 | 1.117 | 0.042  | 1.130 | 0.034  | 1.372 | <0.001 |
| pm29 | 1.029 | 0.380  | 1.165 | 0.016  | 0.996 | 0.359  | 1.079 | 0.918  |
| pm30 | 0.930 | 0.991  | 0.891 | 0.042  | 0.962 | 0.130  | 0.910 | 0.043  |
| pm31 | 1.013 | 0.840  | 1.041 | 0.769  | 1.018 | 0.247  | 1.010 | 0.479  |
| pm32 | 0.998 | 0.270  | 1.090 | 0.255  | 1.000 | 0.259  | 1.045 | 0.111  |
| pm33 | 0.997 | 0.304  | 1.002 | 0.359  | 0.999 | 0.134  | 1.000 | 0.671  |
| pm34 | 1.003 | 0.925  | 1.005 | 0.664  | 1.002 | 0.805  | 1.002 | 0.890  |
| pm35 | 1.001 | 0.782  | 1.001 | 0.392  | 1.009 | 0.944  | 1.007 | 0.819  |
| pm36 | 0.998 | 0.986  | 0.998 | 0.248  | 0.999 | 0.152  | 1.000 | 0.491  |
| pm37 | 0.994 | 0.144  | 1.006 | 0.250  | 0.999 | 0.855  | 1.006 | 0.276  |



1b) Result of one-distribution perturbation analysis for apoptosis when four different response function types were applied in a combined manner

|      | Top 5% |         | Top 10% |         | Top 20% |         |
|------|--------|---------|---------|---------|---------|---------|
|      | Effect | p-value | Effect  | p-value | Effect  | p-value |
| pm1  | 1.020  | 0.257   | 1.015   | 0.527   | 1.012   | 0.168   |
| pm2  | 0.997  | 0.887   | 0.997   | 0.124   | 0.998   | 0.787   |
| pm3  | 0.993  | 0.227   | 0.995   | 0.645   | 0.995   | 0.648   |
| pm4  | 1.004  | 0.646   | 1.004   | 0.862   | 1.003   | 0.571   |
| pm5  | 0.998  | 0.382   | 0.999   | 0.353   | 0.999   | 0.884   |
| pm6  | 1.014  | 0.438   | 1.011   | 0.216   | 1.008   | 0.247   |
| pm7  | 1.888  | <0.001  | 1.700   | <0.001  | 1.385   | <0.001  |
| pm8  | 0.999  | 0.605   | 1.000   | 0.310   | 1.000   | 0.128   |
| pm9  | 1.024  | 0.226   | 1.018   | 0.821   | 1.017   | 0.557   |
| pm10 | 1.876  | <0.001  | 1.667   | <0.001  | 1.597   | <0.001  |
| pm11 | 1.000  | 0.739   | 1.000   | 0.694   | 1.000   | 0.421   |
| pm12 | 1.349  | <0.001  | 1.182   | 0.012   | 1.176   | 0.012   |
| pm13 | 1.004  | 0.144   | 1.003   | 0.486   | 1.003   | 0.708   |
| pm14 | 0.999  | 0.118   | 0.999   | 0.467   | 0.999   | 0.830   |
| pm15 | 1.002  | 0.715   | 1.001   | 0.334   | 1.001   | 0.308   |
| pm16 | 0.996  | 0.306   | 0.997   | 0.914   | 0.998   | 0.346   |
| pm17 | 1.001  | 0.279   | 1.000   | 0.872   | 1.000   | 0.101   |
| pm18 | 0.998  | 0.266   | 0.998   | 0.101   | 0.999   | 0.447   |
| pm19 | 0.998  | 0.834   | 0.998   | 0.347   | 0.999   | 0.230   |
| pm20 | 1.001  | 0.630   | 1.000   | 0.194   | 1.000   | 0.839   |
| pm21 | 1.397  | <0.001  | 1.214   | <0.001  | 1.174   | 0.013   |

|      |       |        |       |       |       |       |
|------|-------|--------|-------|-------|-------|-------|
| pm22 | 1.055 | 0.676  | 1.040 | 0.739 | 1.039 | 0.206 |
| pm23 | 1.065 | 0.666  | 1.060 | 0.970 | 1.043 | 0.122 |
| pm24 | 0.998 | 0.799  | 0.998 | 0.636 | 0.999 | 0.992 |
| pm25 | 0.998 | 0.971  | 0.998 | 0.644 | 0.999 | 0.743 |
| pm26 | 0.998 | 0.121  | 0.998 | 0.963 | 0.999 | 0.893 |
| pm27 | 1.015 | 0.811  | 1.012 | 0.321 | 1.011 | 0.361 |
| pm28 | 1.332 | <0.001 | 1.188 | 0.012 | 1.166 | 0.028 |
| pm29 | 1.027 | 0.380  | 1.020 | 0.540 | 1.017 | 0.303 |
| pm30 | 0.947 | 0.519  | 0.948 | 0.317 | 0.958 | 0.809 |
| pm31 | 1.012 | 0.285  | 1.009 | 0.695 | 1.008 | 0.889 |
| pm32 | 0.999 | 0.533  | 0.999 | 0.711 | 0.999 | 0.494 |
| pm33 | 0.998 | 0.562  | 0.998 | 0.557 | 0.998 | 0.948 |
| pm34 | 1.002 | 0.968  | 1.002 | 0.679 | 1.002 | 0.969 |
| pm35 | 1.001 | 0.735  | 1.001 | 0.818 | 1.000 | 0.902 |
| pm36 | 0.998 | 0.385  | 0.998 | 0.530 | 0.999 | 0.602 |
| pm37 | 0.995 | 0.482  | 0.996 | 0.186 | 0.997 | 0.625 |

2a) Result of reverse one-distribution perturbation analysis for apoptosis when each response function was separately applied

|                   |      | Lin    |         | Hill   |         | Sat    |         | Acc    |         |
|-------------------|------|--------|---------|--------|---------|--------|---------|--------|---------|
|                   |      | Effect | p-value | Effect | p-value | Effect | p-value | Effect | p-value |
| Threshold: top 5% | pm1  | 0.962  | 0.788   | 0.972  | 0.108   | 0.971  | 0.182   | 0.957  | 0.218   |
|                   | pm2  | 0.997  | 0.474   | 0.993  | 0.267   | 0.996  | 0.520   | 1.002  | 0.542   |
|                   | pm3  | 0.990  | 0.170   | 0.961  | 0.476   | 0.998  | 0.930   | 0.989  | 0.168   |
|                   | pm4  | 0.996  | 0.460   | 0.900  | 0.909   | 0.989  | 0.985   | 1.003  | 0.398   |
|                   | pm5  | 0.995  | 0.390   | 1.001  | 0.415   | 1.000  | 0.875   | 0.997  | 0.656   |
|                   | pm6  | 0.987  | 0.616   | 0.976  | 0.915   | 0.887  | 0.019   | 0.992  | 0.820   |
|                   | pm7  | 0.012  | <0.001  | 0.214  | <0.001  | 0.024  | <0.001  | 0.130  | <0.001  |
|                   | pm8  | 0.995  | 0.472   | 0.999  | 0.999   | 0.997  | 0.509   | 0.996  | 0.798   |
|                   | pm9  | 0.952  | 0.670   | 0.957  | 0.444   | 0.975  | 0.334   | 0.969  | 0.152   |
|                   | pm10 | 0.158  | <0.001  | 0.376  | <0.001  | 0.180  | <0.001  | 0.050  | <0.001  |
|                   | pm11 | 0.987  | 0.980   | 0.996  | 0.984   | 0.997  | 0.860   | 0.986  | 0.352   |
|                   | pm12 | 0.816  | 0.009   | 0.743  | <0.001  | 0.761  | <0.001  | 0.694  | <0.001  |
|                   | pm13 | 1.010  | 0.625   | 1.031  | 0.133   | 0.987  | 0.676   | 0.995  | 0.607   |
|                   | pm14 | 1.010  | 0.154   | 1.001  | 0.544   | 0.990  | 0.377   | 1.002  | 0.473   |
|                   | pm15 | 0.981  | 0.702   | 0.992  | 0.324   | 0.983  | 0.202   | 0.978  | 0.469   |
|                   | pm16 | 0.997  | 0.916   | 1.005  | 0.239   | 0.990  | 0.486   | 0.985  | 0.974   |
|                   | pm17 | 0.981  | 0.941   | 0.998  | 0.783   | 0.976  | 0.987   | 0.978  | 0.667   |
|                   | pm18 | 0.997  | 0.336   | 1.001  | 0.569   | 0.999  | 0.951   | 1.001  | 0.120   |
|                   | pm19 | 0.997  | 0.892   | 0.998  | 0.484   | 0.999  | 0.143   | 1.001  | 0.783   |
|                   | pm20 | 0.992  | 0.142   | 0.979  | 0.447   | 0.993  | 0.606   | 1.000  | 0.989   |
|                   | pm21 | 0.981  | 0.611   | 1.008  | 0.872   | 0.643  | <0.001  | 0.967  | 0.714   |

|                    |      |        |         |        |         |        |         |        |         |        |
|--------------------|------|--------|---------|--------|---------|--------|---------|--------|---------|--------|
|                    | pm22 | 1.042  | 0.997   | 1.078  | 0.853   | 1.043  | 0.194   | 1.035  | 0.225   |        |
|                    | pm23 | 0.816  | 0.009   | 0.614  | <0.001  | 0.714  | <0.001  | 0.784  | <0.001  |        |
|                    | pm24 | 0.996  | 0.999   | 0.982  | 0.249   | 1.001  | 0.485   | 1.003  | 0.718   |        |
|                    | pm25 | 0.997  | 0.780   | 1.001  | 0.500   | 0.999  | 0.675   | 1.001  | 0.805   |        |
|                    | pm26 | 0.997  | 0.378   | 1.001  | 0.415   | 0.999  | 0.116   | 1.001  | 0.976   |        |
|                    | pm27 | 0.982  | 0.315   | 0.957  | 0.363   | 0.970  | 0.353   | 0.990  | 0.943   |        |
|                    | pm28 | 0.671  | <0.001  | 0.728  | <0.001  | 0.789  | <0.001  | 0.529  | <0.001  |        |
|                    | pm29 | 1.248  | 0.190   | 1.266  | 0.985   | 1.156  | 0.669   | 1.318  | 0.650   |        |
|                    | pm30 | 0.714  | <0.001  | 0.470  | <0.001  | 0.826  | 0.017   | 0.633  | <0.001  |        |
|                    | pm31 | 0.984  | 0.546   | 0.940  | 0.171   | 0.971  | 0.977   | 0.991  | 0.581   |        |
|                    | pm32 | 1.001  | 0.723   | 0.912  | 0.037   | 0.999  | 0.201   | 0.932  | 0.985   |        |
|                    | pm33 | 0.997  | 0.796   | 1.000  | 0.338   | 0.999  | 0.418   | 1.001  | 0.103   |        |
|                    | pm34 | 0.991  | 0.475   | 1.015  | 0.256   | 0.994  | 0.208   | 0.994  | 0.261   |        |
|                    | pm35 | 1.008  | 0.344   | 1.010  | 0.937   | 1.007  | 0.931   | 1.001  | 0.932   |        |
|                    | pm36 | 0.997  | 0.961   | 0.997  | 0.732   | 0.999  | 0.574   | 1.001  | 0.227   |        |
|                    | pm37 | 0.990  | 0.191   | 1.008  | 0.135   | 1.000  | 0.313   | 1.000  | 0.509   |        |
| Threshold: top 10% |      | Lin    |         | Hill   |         | Sat    |         | Acc    |         |        |
|                    |      | Effect | p-value | Effect | p-value | Effect | p-value | Effect | p-value |        |
|                    |      | pm1    | 0.969   | 0.841  | 0.975   | 0.566  | 0.969   | 0.495  | 0.964   | 0.302  |
|                    |      | pm2    | 0.997   | 0.736  | 0.992   | 0.242  | 0.997   | 0.883  | 1.002   | 0.821  |
|                    |      | pm3    | 0.990   | 0.464  | 0.969   | 0.327  | 0.998   | 0.940  | 0.989   | 0.127  |
|                    |      | pm4    | 0.996   | 0.420  | 0.922   | 0.321  | 0.987   | 0.479  | 1.003   | 0.600  |
|                    |      | pm5    | 0.995   | 0.103  | 1.001   | 0.980  | 1.000   | 0.194  | 0.997   | 0.466  |
|                    |      | pm6    | 0.987   | 0.336  | 0.978   | 0.514  | 0.883   | 0.038  | 0.992   | 0.946  |
|                    |      | pm7    | 0.116   | <0.001 | 0.412   | <0.001 | 0.139   | <0.001 | 0.242   | <0.001 |

|      |       |        |       |        |       |        |       |        |
|------|-------|--------|-------|--------|-------|--------|-------|--------|
| pm8  | 0.995 | 0.309  | 0.999 | 0.612  | 0.997 | 0.450  | 0.996 | 0.402  |
| pm9  | 0.962 | 0.156  | 0.963 | 0.898  | 0.974 | 0.610  | 0.965 | 0.238  |
| pm10 | 0.158 | <0.001 | 0.376 | <0.001 | 0.180 | <0.001 | 0.150 | <0.001 |
| pm11 | 0.990 | 0.181  | 0.996 | 0.445  | 0.997 | 0.232  | 0.988 | 0.225  |
| pm12 | 0.854 | 0.010  | 0.806 | 0.006  | 0.814 | 0.008  | 0.746 | <0.001 |
| pm13 | 1.009 | 0.901  | 1.028 | 0.914  | 0.987 | 0.816  | 0.995 | 0.461  |
| pm14 | 1.011 | 0.302  | 1.001 | 0.493  | 0.989 | 0.826  | 1.003 | 0.939  |
| pm15 | 0.983 | 0.475  | 0.992 | 0.420  | 0.981 | 0.709  | 0.983 | 0.294  |
| pm16 | 0.998 | 0.573  | 1.005 | 0.218  | 0.992 | 0.856  | 0.986 | 0.783  |
| pm17 | 0.985 | 0.721  | 0.998 | 0.583  | 0.978 | 0.924  | 0.980 | 0.235  |
| pm18 | 0.997 | 0.371  | 1.001 | 0.797  | 0.999 | 0.718  | 1.001 | 0.751  |
| pm19 | 0.997 | 0.903  | 0.998 | 0.833  | 0.999 | 0.350  | 1.001 | 0.875  |
| pm20 | 0.991 | 0.259  | 0.981 | 0.926  | 0.994 | 0.348  | 1.000 | 0.228  |
| pm21 | 0.985 | 0.336  | 1.008 | 0.847  | 0.694 | <0.001 | 0.974 | 0.739  |
| pm22 | 1.037 | 0.400  | 1.083 | 0.266  | 1.036 | 0.435  | 1.026 | 0.937  |
| pm23 | 0.876 | 0.032  | 0.670 | <0.001 | 0.817 | 0.009  | 0.837 | 0.011  |
| pm24 | 0.997 | 0.348  | 0.985 | 0.163  | 1.001 | 0.540  | 1.003 | 0.859  |
| pm25 | 0.997 | 0.887  | 1.001 | 0.171  | 0.999 | 0.586  | 1.001 | 0.933  |
| pm26 | 0.997 | 0.637  | 1.001 | 0.186  | 0.999 | 0.864  | 1.001 | 0.932  |
| pm27 | 0.984 | 0.326  | 0.957 | 0.173  | 0.974 | 0.777  | 0.992 | 0.724  |
| pm28 | 0.728 | <0.001 | 0.811 | 0.011  | 0.822 | 0.013  | 0.605 | <0.001 |
| pm29 | 1.194 | 0.536  | 1.208 | 0.374  | 1.123 | 0.312  | 1.258 | 0.885  |
| pm30 | 0.749 | <0.001 | 0.565 | <0.001 | 0.886 | 0.038  | 0.661 | <0.001 |
| pm31 | 0.987 | 0.405  | 0.947 | 0.650  | 0.975 | 0.336  | 0.992 | 0.336  |
| pm32 | 1.001 | 0.736  | 0.917 | 0.079  | 0.999 | 0.644  | 0.936 | 0.468  |
| pm33 | 0.997 | 0.116  | 1.000 | 0.702  | 0.999 | 0.510  | 1.001 | 0.768  |

|                    |      |        |         |        |         |        |         |        |         |        |
|--------------------|------|--------|---------|--------|---------|--------|---------|--------|---------|--------|
|                    | pm34 | 0.992  | 0.147   | 1.015  | 0.208   | 0.995  | 0.664   | 0.994  | 0.266   |        |
|                    | pm35 | 1.007  | 0.467   | 1.010  | 0.536   | 1.005  | 0.666   | 1.001  | 0.546   |        |
|                    | pm36 | 0.997  | 0.341   | 0.997  | 0.516   | 0.999  | 0.558   | 1.001  | 0.210   |        |
|                    | pm37 | 0.990  | 0.549   | 1.009  | 0.473   | 1.000  | 0.202   | 1.000  | 0.124   |        |
| Threshold: top 20% |      | Lin    |         | Hill   |         | Sat    |         | Acc    |         |        |
|                    |      | Effect | p-value | Effect | p-value | Effect | p-value | Effect | p-value |        |
|                    |      | pm1    | 0.976   | 0.300  | 0.977   | 0.425  | 0.974   | 0.213  | 0.969   | 0.873  |
|                    |      | pm2    | 0.998   | 0.697  | 0.995   | 0.603  | 0.997   | 0.225  | 1.001   | 0.866  |
|                    |      | pm3    | 0.993   | 0.854  | 0.976   | 0.856  | 0.998   | 0.243  | 0.991   | 0.285  |
|                    |      | pm4    | 0.997   | 0.910  | 0.928   | 0.937  | 0.989   | 0.583  | 1.002   | 0.795  |
|                    |      | pm5    | 0.996   | 0.137  | 1.001   | 0.964  | 1.000   | 0.888  | 0.997   | 0.822  |
|                    |      | pm6    | 0.990   | 0.523  | 0.983   | 0.671  | 0.904   | 0.080  | 0.994   | 0.123  |
|                    |      | pm7    | 0.302   | <0.001 | 0.536   | <0.001 | 0.255   | <0.001 | 0.387   | <0.001 |
|                    |      | pm8    | 0.996   | 0.760  | 0.999   | 0.147  | 0.998   | 0.778  | 0.997   | 0.882  |
|                    |      | pm9    | 0.968   | 0.731  | 0.972   | 0.558  | 0.978   | 0.856  | 0.972   | 0.458  |
|                    |      | pm10   | 0.274   | <0.001 | 0.431   | <0.001 | 0.394   | <0.001 | 0.290   | <0.001 |
|                    |      | pm11   | 0.991   | 0.384  | 0.997   | 0.203  | 0.998   | 0.825  | 0.989   | 0.478  |
|                    |      | pm12   | 0.888   | 0.032  | 0.829   | 0.011  | 0.897   | 0.038  | 0.754   | <0.001 |
|                    |      | pm13   | 1.007   | 0.616  | 1.025   | 0.105  | 0.990   | 0.370  | 0.996   | 0.822  |
|                    |      | pm14   | 1.008   | 0.946  | 1.001   | 0.998  | 0.991   | 0.465  | 1.002   | 0.426  |
|                    |      | pm15   | 0.986   | 0.426  | 0.995   | 0.479  | 0.984   | 0.362  | 0.986   | 0.152  |
|                    |      | pm16   | 0.998   | 0.375  | 1.004   | 0.635  | 0.994   | 0.269  | 0.988   | 0.888  |
|                    |      | pm17   | 0.988   | 0.597  | 0.998   | 0.415  | 0.982   | 0.282  | 0.982   | 0.158  |
|                    |      | pm18   | 0.998   | 0.604  | 1.000   | 0.655  | 1.000   | 0.632  | 1.000   | 0.991  |
|                    | pm19 | 0.998  | 0.347   | 0.998  | 0.908   | 0.999  | 0.138   | 1.000  | 0.835   |        |

|      |       |        |       |        |       |        |       |        |
|------|-------|--------|-------|--------|-------|--------|-------|--------|
| pm20 | 0.992 | 0.199  | 0.986 | 0.143  | 0.996 | 0.385  | 1.000 | 0.936  |
| pm21 | 0.986 | 0.322  | 1.006 | 0.235  | 0.720 | <0.001 | 0.976 | 0.681  |
| pm22 | 1.033 | 0.811  | 1.071 | 0.253  | 1.030 | 0.962  | 1.024 | 0.336  |
| pm23 | 0.890 | 0.039  | 0.729 | <0.001 | 0.863 | 0.011  | 0.897 | 0.042  |
| pm24 | 0.997 | 0.703  | 0.989 | 0.982  | 1.001 | 0.580  | 1.002 | 0.513  |
| pm25 | 0.998 | 0.749  | 1.001 | 0.721  | 0.999 | 0.832  | 1.000 | 0.611  |
| pm26 | 0.997 | 0.237  | 1.001 | 0.947  | 0.999 | 0.849  | 1.000 | 0.930  |
| pm27 | 0.988 | 0.603  | 0.960 | 0.181  | 0.980 | 0.283  | 0.994 | 0.848  |
| pm28 | 0.788 | <0.001 | 0.895 | 0.040  | 0.847 | 0.011  | 0.700 | <0.001 |
| pm29 | 1.177 | 0.541  | 1.175 | 0.800  | 1.115 | 0.529  | 1.207 | 0.717  |
| pm30 | 0.790 | <0.001 | 0.680 | <0.001 | 0.887 | 0.041  | 0.715 | <0.001 |
| pm31 | 0.989 | 0.615  | 0.959 | 0.414  | 0.979 | 0.630  | 0.994 | 0.930  |
| pm32 | 1.001 | 0.339  | 0.920 | 0.041  | 1.000 | 0.701  | 0.947 | 0.917  |
| pm33 | 0.998 | 0.697  | 1.000 | 0.995  | 0.999 | 0.457  | 1.000 | 0.673  |
| pm34 | 0.994 | 0.935  | 1.012 | 0.899  | 0.996 | 0.909  | 0.995 | 0.162  |
| pm35 | 1.005 | 0.282  | 1.008 | 0.350  | 1.004 | 0.273  | 1.001 | 0.860  |
| pm36 | 0.998 | 0.889  | 0.998 | 0.394  | 0.999 | 0.566  | 1.000 | 0.285  |
| pm37 | 0.992 | 0.381  | 1.007 | 0.932  | 1.000 | 0.438  | 1.000 | 0.950  |

2b) Result of reverse one-distribution perturbation analysis for apoptosis in cardiac signaling network when four different response function types were applied in a combined manner

|      | Top 5% |         | Top 10% |         | Top 20% |         |
|------|--------|---------|---------|---------|---------|---------|
|      | Effect | p-value | Effect  | p-value | Effect  | p-value |
| pm1  | 1.024  | 0.580   | 1.022   | 0.108   | 1.018   | 0.160   |
| pm2  | 0.997  | 0.515   | 0.998   | 0.412   | 0.998   | 0.111   |
| pm3  | 0.993  | 0.616   | 0.994   | 0.947   | 0.995   | 0.853   |
| pm4  | 0.997  | 0.493   | 0.998   | 0.770   | 0.998   | 0.465   |
| pm5  | 0.996  | 0.741   | 0.997   | 0.908   | 0.997   | 0.714   |
| pm6  | 0.991  | 0.719   | 0.993   | 0.474   | 0.994   | 0.141   |
| pm7  | 0.192  | <0.001  | 0.413   | <0.001  | 0.497   | <0.001  |
| pm8  | 0.995  | 0.455   | 0.997   | 0.788   | 0.997   | 0.201   |
| pm9  | 0.965  | 0.234   | 0.972   | 0.729   | 0.976   | 0.110   |
| pm10 | 0.338  | <0.001  | 0.391   | <0.001  | 0.518   | <0.001  |
| pm11 | 0.992  | 0.914   | 0.993   | 0.719   | 0.995   | 0.273   |
| pm12 | 0.775  | <0.001  | 0.853   | 0.028   | 0.891   | 0.040   |
| pm13 | 1.006  | 0.396   | 1.005   | 0.124   | 1.004   | 0.519   |
| pm14 | 1.009  | 0.590   | 1.007   | 0.603   | 1.005   | 0.348   |
| pm15 | 0.985  | 0.224   | 0.987   | 0.596   | 0.990   | 0.618   |
| pm16 | 0.998  | 0.511   | 0.998   | 0.313   | 0.999   | 0.529   |
| pm17 | 0.986  | 0.944   | 0.990   | 0.180   | 0.992   | 0.241   |
| pm18 | 0.998  | 0.842   | 0.998   | 0.522   | 0.999   | 0.283   |
| pm19 | 0.998  | 0.153   | 0.998   | 0.778   | 0.999   | 0.507   |
| pm20 | 0.993  | 0.674   | 0.994   | 0.114   | 0.995   | 0.272   |
| pm21 | 0.986  | 0.167   | 0.988   | 0.866   | 0.992   | 0.834   |



|      |       |        |       |       |       |       |
|------|-------|--------|-------|-------|-------|-------|
| pm22 | 1.028 | 0.512  | 1.023 | 0.983 | 1.021 | 0.310 |
| pm23 | 0.797 | <0.001 | 0.823 | 0.016 | 0.880 | 0.018 |
| pm24 | 0.997 | 0.360  | 0.998 | 0.529 | 0.998 | 0.976 |
| pm25 | 0.998 | 0.478  | 0.998 | 0.995 | 0.998 | 0.660 |
| pm26 | 0.997 | 0.649  | 0.998 | 0.256 | 0.998 | 0.137 |
| pm27 | 0.988 | 0.566  | 0.990 | 0.380 | 0.992 | 0.118 |
| pm28 | 0.778 | <0.001 | 0.812 | 0.010 | 0.849 | 0.023 |
| pm29 | 1.056 | 0.531  | 1.014 | 0.691 | 1.011 | 0.497 |
| pm30 | 0.782 | <0.001 | 0.822 | 0.011 | 0.848 | 0.022 |
| pm31 | 0.987 | 0.123  | 0.991 | 0.277 | 0.992 | 0.718 |
| pm32 | 1.001 | 0.719  | 1.001 | 0.885 | 1.001 | 0.809 |
| pm33 | 0.998 | 0.922  | 0.998 | 0.141 | 0.998 | 0.681 |
| pm34 | 0.994 | 0.236  | 0.995 | 0.251 | 0.996 | 0.466 |
| pm35 | 1.006 | 0.648  | 1.004 | 0.455 | 1.004 | 0.662 |
| pm36 | 0.997 | 0.966  | 0.998 | 0.657 | 0.998 | 0.520 |
| pm37 | 0.992 | 0.408  | 0.994 | 0.489 | 0.995 | 0.196 |

3a) Result of two-distribution perturbation analysis for apoptosis when each response function was separately applied (1 million parameter sets)

| No. | Pair of perturbed parameter distributions | Lin   | Hill  | Sat   | Acc   | Synergistic effect | p-value |
|-----|-------------------------------------------|-------|-------|-------|-------|--------------------|---------|
| 1   | pm1-pm2                                   | 1.036 | 1.061 | 1     | 1.024 | 0.016              | 0.35    |
| 2   | pm1-pm3                                   | 1.016 | 1.086 | 1.038 | 1.041 | 0.024              | 0.28    |
| 3   | pm1-pm4                                   | 1.038 | 1.039 | 1.043 | 1.016 | -0.008             | 0.569   |
| 4   | pm1-pm5                                   | 0.997 | 0.992 | 1.005 | 1.006 | -0.014             | 0.387   |
| 5   | pm1-pm6                                   | 1.059 | 1.042 | 1.134 | 1.052 | 0.02               | 0.369   |
| 6   | pm1-pm7                                   | 1.951 | 1.598 | 2.073 | 1.591 | -0.116             | 0.008   |
| 7   | pm1-pm8                                   | 1.018 | 1.048 | 1     | 1.025 | 0.01               | 0.405   |
| 8   | pm1-pm9                                   | 1.058 | 1.125 | 1.047 | 1.048 | 0.02               | 0.399   |
| 9   | pm1-pm10                                  | 2.258 | 1.879 | 2.052 | 2.261 | 0.078              | 0.012   |
| 10  | pm1-pm11                                  | 1.048 | 1.061 | 1.004 | 1.046 | 0.019              | 0.338   |
| 11  | pm1-pm12                                  | 1.148 | 1.208 | 1.067 | 1.28  | -0.023             | 0.213   |
| 12  | pm1-pm13                                  | 1.008 | 1.055 | 1.02  | 0.999 | -0.003             | 0.736   |
| 13  | pm1-pm14                                  | 0.983 | 1.087 | 0.974 | 1.009 | -0.005             | 0.656   |
| 14  | pm1-pm15                                  | 1.03  | 1.058 | 1.062 | 1.045 | 0.027              | 0.259   |
| 15  | pm1-pm16                                  | 0.988 | 1.061 | 1.055 | 1.027 | 0.017              | 0.331   |
| 16  | pm1-pm17                                  | 1     | 1.024 | 1.011 | 1.001 | -0.008             | 0.409   |
| 17  | pm1-pm18                                  | 1.007 | 1.012 | 1.038 | 1.026 | 0.006              | 0.565   |
| 18  | pm1-pm19                                  | 1.011 | 1.029 | 1.015 | 1.031 | 0.007              | 0.423   |
| 19  | pm1-pm20                                  | 1.015 | 1.019 | 0.992 | 1.024 | -0.005             | 0.507   |
| 20  | pm1-pm21                                  | 1.158 | 1.313 | 1.41  | 1.037 | -0.047             | 0.168   |
| 21  | pm1-pm22                                  | 1.087 | 1.183 | 1.103 | 1.072 | 0.017              | 0.352   |
| 22  | pm1-pm23                                  | 1.135 | 1.249 | 1.117 | 1.057 | 0.002              | 0.835   |
| 23  | pm1-pm24                                  | 0.999 | 1.068 | 1.004 | 1.031 | 0.007              | 0.569   |
| 24  | pm1-pm25                                  | 1.019 | 1.025 | 1.022 | 1.034 | 0.01               | 0.598   |

|    |          |       |       |       |       |        |       |
|----|----------|-------|-------|-------|-------|--------|-------|
| 25 | pm1-pm26 | 1.028 | 1.039 | 0.992 | 1.009 | 0.002  | 0.782 |
| 26 | pm1-pm27 | 1.009 | 1.09  | 1.021 | 1.038 | 0.003  | 0.776 |
| 27 | pm1-pm28 | 1.262 | 1.105 | 1.137 | 1.382 | -0.049 | 0.161 |
| 28 | pm1-pm29 | 0.992 | 1.211 | 1.032 | 1.088 | -0.011 | 0.359 |
| 29 | pm1-pm30 | 0.931 | 0.949 | 0.97  | 0.926 | 0.015  | 0.376 |
| 30 | pm1-pm31 | 1.021 | 1.052 | 1.046 | 1.022 | -0.004 | 0.84  |
| 31 | pm1-pm32 | 1.022 | 1.187 | 1.05  | 1.053 | 0.025  | 0.226 |
| 32 | pm1-pm33 | 0.992 | 1.033 | 1.012 | 1.019 | -0.002 | 0.918 |
| 33 | pm1-pm34 | 1.042 | 1.074 | 1.011 | 1.005 | 0.013  | 0.378 |
| 34 | pm1-pm35 | 1.037 | 1.093 | 1.02  | 1.031 | 0.025  | 0.278 |
| 35 | pm1-pm36 | 1.018 | 1.034 | 0.995 | 1.038 | 0.007  | 0.579 |
| 36 | pm1-pm37 | 1.011 | 1.03  | 0.985 | 1.014 | -0.008 | 0.566 |
| 37 | pm2-pm3  | 0.986 | 1.023 | 1.031 | 0.996 | 0.005  | 0.553 |
| 38 | pm2-pm4  | 0.997 | 1.066 | 1.041 | 0.979 | -0.003 | 0.72  |
| 39 | pm2-pm5  | 0.979 | 1     | 0.988 | 1.02  | 0.001  | 0.719 |
| 40 | pm2-pm6  | 1.007 | 1.013 | 1.104 | 1.027 | 0.004  | 0.602 |
| 41 | pm2-pm7  | 1.96  | 1.553 | 2.079 | 1.616 | -0.1   | 0.008 |
| 42 | pm2-pm8  | 0.995 | 1.018 | 0.992 | 0.979 | 0.001  | 0.93  |
| 43 | pm2-pm9  | 1.037 | 1.055 | 1.011 | 1.028 | 0.001  | 0.998 |
| 44 | pm2-pm10 | 2.284 | 1.898 | 2.183 | 2.302 | 0.15   | 0.009 |
| 45 | pm2-pm11 | 1.001 | 1.011 | 0.972 | 1.01  | -0.005 | 0.831 |
| 46 | pm2-pm12 | 1.105 | 1.144 | 1.051 | 1.188 | -0.059 | 0.031 |
| 47 | pm2-pm13 | 0.983 | 1.053 | 0.991 | 0.989 | -0.002 | 0.918 |
| 48 | pm2-pm14 | 0.988 | 1.029 | 1.016 | 1.009 | 0.01   | 0.312 |
| 49 | pm2-pm15 | 0.997 | 1.035 | 1.018 | 1.018 | 0.014  | 0.362 |
| 50 | pm2-pm16 | 1.028 | 1.039 | 1.003 | 1.014 | 0.023  | 0.29  |
| 51 | pm2-pm17 | 1     | 1.004 | 0.985 | 0.974 | -0.008 | 0.531 |
| 52 | pm2-pm18 | 0.991 | 0.999 | 0.981 | 1.018 | 0.001  | 0.804 |
| 53 | pm2-pm19 | 1.001 | 1.022 | 0.993 | 0.995 | 0.006  | 0.434 |
| 54 | pm2-pm20 | 1.015 | 1.033 | 0.996 | 0.993 | 0.009  | 0.546 |

|    |          |       |       |       |       |        |       |
|----|----------|-------|-------|-------|-------|--------|-------|
| 55 | pm2-pm21 | 1.093 | 1.302 | 1.39  | 1.007 | -0.06  | 0.021 |
| 56 | pm2-pm22 | 1.045 | 1.135 | 1.096 | 1.011 | -0.005 | 0.98  |
| 57 | pm2-pm23 | 1.064 | 1.239 | 1.116 | 1.051 | -0.002 | 0.641 |
| 58 | pm2-pm24 | 0.966 | 1.03  | 1.021 | 0.975 | -0.003 | 0.623 |
| 59 | pm2-pm25 | 0.991 | 1     | 0.997 | 1.017 | 0.004  | 0.634 |
| 60 | pm2-pm26 | 0.981 | 0.988 | 0.987 | 1.014 | -0.005 | 0.718 |
| 61 | pm2-pm27 | 1.002 | 1.012 | 1.037 | 1.008 | -0.004 | 0.773 |
| 62 | pm2-pm28 | 1.216 | 1.066 | 1.108 | 1.344 | -0.07  | 0.023 |
| 63 | pm2-pm29 | 1.024 | 1.235 | 0.998 | 1.054 | 0.003  | 0.886 |
| 64 | pm2-pm30 | 0.923 | 0.921 | 0.992 | 0.892 | 0.021  | 0.219 |
| 65 | pm2-pm31 | 0.984 | 1.029 | 1.031 | 0.993 | -0.012 | 0.327 |
| 66 | pm2-pm32 | 0.988 | 1.136 | 1.026 | 1.038 | 0.012  | 0.349 |
| 67 | pm2-pm33 | 0.969 | 0.982 | 0.997 | 0.995 | -0.012 | 0.313 |
| 68 | pm2-pm34 | 0.984 | 1.01  | 1.023 | 1.021 | 0.008  | 0.548 |
| 69 | pm2-pm35 | 1.026 | 1.011 | 0.991 | 1.003 | 0.005  | 0.728 |
| 70 | pm2-pm36 | 0.991 | 1.007 | 1.016 | 1.002 | 0.007  | 0.474 |
| 71 | pm2-pm37 | 0.992 | 0.991 | 1.003 | 1.027 | 0.003  | 0.851 |
| 72 | pm3-pm4  | 0.987 | 1.038 | 0.992 | 1.008 | -0.025 | 0.279 |
| 73 | pm3-pm5  | 0.976 | 1.031 | 1.017 | 1.025 | 0.008  | 0.446 |
| 74 | pm3-pm6  | 1.046 | 1.027 | 1.081 | 1.018 | 0.001  | 0.818 |
| 75 | pm3-pm7  | 1.951 | 1.58  | 2.084 | 1.62  | -0.101 | 0.007 |
| 76 | pm3-pm8  | 1.008 | 1.031 | 1.021 | 1     | 0.012  | 0.376 |
| 77 | pm3-pm9  | 1.038 | 1.022 | 1.047 | 1.03  | -0.006 | 0.405 |
| 78 | pm3-pm10 | 2.282 | 1.942 | 2.455 | 2.038 | 0.155  | 0.002 |
| 79 | pm3-pm11 | 0.999 | 1.007 | 1.01  | 1.004 | -0.005 | 0.583 |
| 80 | pm3-pm12 | 1.11  | 1.214 | 1.042 | 1.21  | -0.045 | 0.16  |
| 81 | pm3-pm13 | 0.972 | 1.058 | 0.994 | 0.97  | -0.015 | 0.305 |
| 82 | pm3-pm14 | 1.009 | 1.054 | 0.998 | 0.985 | 0.004  | 0.886 |
| 83 | pm3-pm15 | 0.985 | 1.028 | 1.018 | 1.01  | -0.001 | 0.652 |
| 84 | pm3-pm16 | 0.997 | 1.017 | 1.022 | 1.014 | 0.007  | 0.555 |

|     |          |       |       |       |       |        |       |
|-----|----------|-------|-------|-------|-------|--------|-------|
| 85  | pm3-pm17 | 1.005 | 1.02  | 1.035 | 1.004 | 0.009  | 0.527 |
| 86  | pm3-pm18 | 1.022 | 1.026 | 1.014 | 1.023 | 0.017  | 0.304 |
| 87  | pm3-pm19 | 0.99  | 1.015 | 1.001 | 1.001 | -0.003 | 0.681 |
| 88  | pm3-pm20 | 1.006 | 1.031 | 1.022 | 1.003 | 0.008  | 0.443 |
| 89  | pm3-pm21 | 1.116 | 1.299 | 1.341 | 1.006 | -0.076 | 0.012 |
| 90  | pm3-pm22 | 1.091 | 1.178 | 1.075 | 1.006 | 0.003  | 0.884 |
| 91  | pm3-pm23 | 1.096 | 1.231 | 1.157 | 1.066 | 0.01   | 0.503 |
| 92  | pm3-pm24 | 1.001 | 1.036 | 0.995 | 1.012 | 0.002  | 0.972 |
| 93  | pm3-pm25 | 1.016 | 1.003 | 1.01  | 0.984 | -0.002 | 0.936 |
| 94  | pm3-pm26 | 0.995 | 1.029 | 1.013 | 1.019 | 0.009  | 0.463 |
| 95  | pm3-pm27 | 1.009 | 1.029 | 1.026 | 1.001 | -0.01  | 0.329 |
| 96  | pm3-pm28 | 1.218 | 1.084 | 1.141 | 1.327 | -0.069 | 0.027 |
| 97  | pm3-pm29 | 0.971 | 1.189 | 0.999 | 1.036 | -0.034 | 0.298 |
| 98  | pm3-pm30 | 0.911 | 0.908 | 0.946 | 0.892 | -0.005 | 0.88  |
| 99  | pm3-pm31 | 1.021 | 1.061 | 1.013 | 0.985 | -0.009 | 0.498 |
| 100 | pm3-pm32 | 0.991 | 1.139 | 1.04  | 1.046 | 0.011  | 0.336 |
| 101 | pm3-pm33 | 0.986 | 0.997 | 0.993 | 0.978 | -0.017 | 0.312 |
| 102 | pm3-pm34 | 1.042 | 1.071 | 1.014 | 0.982 | 0.018  | 0.322 |
| 103 | pm3-pm35 | 0.985 | 1.005 | 1.024 | 0.981 | -0.012 | 0.35  |
| 104 | pm3-pm36 | 0.979 | 0.963 | 0.999 | 1.018 | -0.015 | 0.358 |
| 105 | pm3-pm37 | 1.002 | 0.997 | 1.022 | 1.019 | 0.003  | 0.848 |
| 106 | pm4-pm5  | 1.001 | 1.041 | 1.003 | 1.023 | -0.007 | 0.522 |
| 107 | pm4-pm6  | 1.009 | 1.032 | 1.102 | 0.997 | -0.027 | 0.234 |
| 108 | pm4-pm7  | 1.898 | 1.608 | 2.094 | 1.598 | -0.13  | 0.006 |
| 109 | pm4-pm8  | 1.017 | 1.073 | 1.004 | 1.015 | 0.004  | 0.757 |
| 110 | pm4-pm9  | 1.041 | 1.077 | 1.038 | 1.021 | -0.016 | 0.365 |
| 111 | pm4-pm10 | 2.074 | 1.863 | 2.009 | 2.147 | -0.022 | 0.265 |
| 112 | pm4-pm11 | 0.986 | 1.049 | 1.017 | 1.029 | -0.011 | 0.343 |
| 113 | pm4-pm12 | 1.116 | 1.213 | 1.068 | 1.223 | -0.054 | 0.028 |
| 114 | pm4-pm13 | 0.98  | 1.023 | 1.037 | 0.963 | -0.033 | 0.207 |

|     |          |       |       |       |       |        |       |
|-----|----------|-------|-------|-------|-------|--------|-------|
| 115 | pm4-pm14 | 0.994 | 1.075 | 1.006 | 1.015 | -0.006 | 0.58  |
| 116 | pm4-pm15 | 1.003 | 1.085 | 1.048 | 0.996 | 0.002  | 0.991 |
| 117 | pm4-pm16 | 1.034 | 1.073 | 1.019 | 0.973 | -0.001 | 0.748 |
| 118 | pm4-pm17 | 1.014 | 1.063 | 1.02  | 0.999 | -0.003 | 0.657 |
| 119 | pm4-pm18 | 0.994 | 1.024 | 1.018 | 0.983 | -0.02  | 0.305 |
| 120 | pm4-pm19 | 1.001 | 1.022 | 1     | 0.989 | -0.022 | 0.269 |
| 121 | pm4-pm20 | 1.01  | 1.078 | 1.031 | 1.002 | 0.002  | 0.871 |
| 122 | pm4-pm21 | 1.155 | 1.311 | 1.425 | 1.039 | -0.054 | 0.041 |
| 123 | pm4-pm22 | 1.063 | 1.217 | 1.14  | 1.03  | 0.008  | 0.426 |
| 124 | pm4-pm23 | 1.151 | 1.424 | 1.126 | 1.07  | 0.045  | 0.158 |
| 125 | pm4-pm24 | 1.007 | 1.056 | 1.039 | 0.985 | -0.008 | 0.518 |
| 126 | pm4-pm25 | 0.995 | 1.077 | 0.992 | 1.005 | -0.008 | 0.558 |
| 127 | pm4-pm26 | 1.029 | 1.067 | 0.993 | 0.975 | -0.009 | 0.414 |
| 128 | pm4-pm27 | 1.031 | 1.045 | 1.014 | 1.002 | -0.024 | 0.222 |
| 129 | pm4-pm28 | 1.242 | 1.143 | 1.156 | 1.318 | -0.066 | 0.041 |
| 130 | pm4-pm29 | 1.033 | 1.344 | 1.001 | 1.089 | 0.014  | 0.326 |
| 131 | pm4-pm30 | 0.929 | 0.958 | 0.966 | 0.88  | -0.005 | 0.593 |
| 132 | pm4-pm31 | 1.008 | 1.066 | 1.057 | 1.029 | -0.009 | 0.483 |
| 133 | pm4-pm32 | 1.001 | 1.16  | 1.025 | 1.031 | -0.009 | 0.543 |
| 134 | pm4-pm33 | 1.023 | 1.047 | 1.009 | 1.001 | -0.006 | 0.495 |
| 135 | pm4-pm34 | 0.99  | 1.112 | 1.05  | 0.977 | 0.003  | 0.99  |
| 136 | pm4-pm35 | 1.028 | 1.042 | 1.006 | 0.994 | -0.013 | 0.371 |
| 137 | pm4-pm36 | 0.983 | 1.024 | 1.038 | 1.037 | -0.004 | 0.842 |
| 138 | pm4-pm37 | 1.02  | 1.049 | 1.016 | 0.988 | -0.009 | 0.465 |
| 139 | pm5-pm6  | 1.032 | 0.986 | 1.12  | 1.003 | 0.001  | 0.736 |
| 140 | pm5-pm7  | 1.937 | 1.583 | 2.1   | 1.597 | -0.098 | 0.015 |
| 141 | pm5-pm8  | 0.994 | 1.008 | 0.994 | 0.973 | -0.003 | 0.604 |
| 142 | pm5-pm9  | 1.012 | 1.033 | 1.01  | 1.044 | -0.008 | 0.446 |
| 143 | pm5-pm10 | 2.133 | 1.728 | 1.96  | 2.2   | -0.012 | 0.328 |
| 144 | pm5-pm11 | 0.989 | 0.978 | 0.991 | 1.027 | -0.007 | 0.487 |

|     |          |       |       |       |       |        |       |
|-----|----------|-------|-------|-------|-------|--------|-------|
| 145 | pm5-pm12 | 1.132 | 1.167 | 1.007 | 1.246 | -0.043 | 0.166 |
| 146 | pm5-pm13 | 0.988 | 0.992 | 1.004 | 0.98  | -0.015 | 0.323 |
| 147 | pm5-pm14 | 0.989 | 1.031 | 1.009 | 1.003 | 0.007  | 0.514 |
| 148 | pm5-pm15 | 0.987 | 1.014 | 0.99  | 1.002 | -0.005 | 0.581 |
| 149 | pm5-pm16 | 0.995 | 0.997 | 1.006 | 0.987 | -0.002 | 0.684 |
| 150 | pm5-pm17 | 1.002 | 0.974 | 0.994 | 0.991 | -0.009 | 0.522 |
| 151 | pm5-pm18 | 1.02  | 1.004 | 0.989 | 0.982 | 0.002  | 0.732 |
| 152 | pm5-pm19 | 0.975 | 0.987 | 0.999 | 0.997 | -0.008 | 0.465 |
| 153 | pm5-pm20 | 0.975 | 1.001 | 0.976 | 0.992 | -0.014 | 0.364 |
| 154 | pm5-pm21 | 1.1   | 1.305 | 1.356 | 1.046 | -0.057 | 0.044 |
| 155 | pm5-pm22 | 1.057 | 1.131 | 1.073 | 1.035 | -0.003 | 0.774 |
| 156 | pm5-pm23 | 1.073 | 1.187 | 1.126 | 1.055 | -0.01  | 0.447 |
| 157 | pm5-pm24 | 1.007 | 0.988 | 1.007 | 0.999 | -0.001 | 0.657 |
| 158 | pm5-pm25 | 0.992 | 0.981 | 0.979 | 1.001 | -0.009 | 0.439 |
| 159 | pm5-pm26 | 0.982 | 0.98  | 0.982 | 0.985 | -0.016 | 0.355 |
| 160 | pm5-pm27 | 0.992 | 1.021 | 1.012 | 1.013 | -0.01  | 0.46  |
| 161 | pm5-pm28 | 1.2   | 1.056 | 1.135 | 1.385 | -0.06  | 0.021 |
| 162 | pm5-pm29 | 1.013 | 1.157 | 0.95  | 1.106 | -0.018 | 0.399 |
| 163 | pm5-pm30 | 0.918 | 0.871 | 1.008 | 0.881 | 0.009  | 0.546 |
| 164 | pm5-pm31 | 1.021 | 1.04  | 1.041 | 1.043 | 0.015  | 0.347 |
| 165 | pm5-pm32 | 1.01  | 1.141 | 1.013 | 1.033 | 0.014  | 0.331 |
| 166 | pm5-pm33 | 1.023 | 0.989 | 0.994 | 1.007 | 0.005  | 0.475 |
| 167 | pm5-pm34 | 0.997 | 1.015 | 1.013 | 0.972 | -0.003 | 0.615 |
| 168 | pm5-pm35 | 1.011 | 1.021 | 1.007 | 0.997 | 0.006  | 0.435 |
| 169 | pm5-pm36 | 1.004 | 1.018 | 1.015 | 1.01  | 0.015  | 0.303 |
| 170 | pm5-pm37 | 0.99  | 1.008 | 1.018 | 1.012 | 0.007  | 0.542 |
| 171 | pm6-pm7  | 1.997 | 1.544 | 2.276 | 1.657 | -0.072 | 0.019 |
| 172 | pm6-pm8  | 1.016 | 1.052 | 1.113 | 1.028 | 0.018  | 0.333 |
| 173 | pm6-pm9  | 1.055 | 1.034 | 1.13  | 1.045 | -0.004 | 0.612 |
| 174 | pm6-pm10 | 2.271 | 1.951 | 2.296 | 2.345 | 0.161  | 0.004 |

|     |          |       |       |       |       |        |        |
|-----|----------|-------|-------|-------|-------|--------|--------|
| 175 | pm6-pm11 | 1.041 | 1.002 | 1.098 | 1.009 | -0.004 | 0.999  |
| 176 | pm6-pm12 | 1.115 | 1.19  | 1.124 | 1.25  | -0.05  | 0.195  |
| 177 | pm6-pm13 | 0.993 | 1.013 | 1.087 | 1.004 | -0.02  | 0.37   |
| 178 | pm6-pm14 | 1.023 | 1.083 | 1.087 | 1.018 | 0.014  | 0.389  |
| 179 | pm6-pm15 | 1.046 | 1.02  | 1.128 | 1.04  | 0.016  | 0.315  |
| 180 | pm6-pm16 | 1.045 | 1.008 | 1.084 | 1.033 | 0.006  | 0.525  |
| 181 | pm6-pm17 | 1.042 | 1.014 | 1.093 | 0.991 | -0.002 | 0.672  |
| 182 | pm6-pm18 | 1.018 | 0.998 | 1.102 | 1.015 | -0.002 | 0.903  |
| 183 | pm6-pm19 | 1.013 | 1.027 | 1.112 | 1.033 | 0.011  | 0.335  |
| 184 | pm6-pm20 | 1.037 | 1.02  | 1.11  | 1.016 | 0.008  | 0.525  |
| 185 | pm6-pm21 | 1.131 | 1.323 | 1.527 | 1.043 | -0.041 | 0.183  |
| 186 | pm6-pm22 | 1.095 | 1.139 | 1.187 | 1.015 | -0.006 | 0.451  |
| 187 | pm6-pm23 | 1.068 | 1.25  | 1.2   | 1.06  | -0.014 | 0.387  |
| 188 | pm6-pm24 | 1.036 | 1.027 | 1.1   | 1.025 | 0.008  | 0.533  |
| 189 | pm6-pm25 | 1.012 | 1.008 | 1.109 | 0.982 | -0.008 | 0.533  |
| 190 | pm6-pm26 | 1.033 | 0.991 | 1.093 | 1.031 | 0.001  | 0.646  |
| 191 | pm6-pm27 | 1.053 | 1.06  | 1.145 | 1.025 | 0.013  | 0.323  |
| 192 | pm6-pm28 | 1.299 | 1.095 | 1.209 | 1.312 | -0.063 | 0.041  |
| 193 | pm6-pm29 | 0.996 | 1.156 | 1.12  | 1.115 | -0.016 | 0.362  |
| 194 | pm6-pm30 | 0.931 | 0.945 | 1.056 | 0.917 | 0.013  | 0.375  |
| 195 | pm6-pm31 | 1.044 | 1.038 | 1.074 | 1.023 | -0.015 | 0.389  |
| 196 | pm6-pm32 | 1.026 | 1.15  | 1.124 | 1.069 | 0.018  | 0.359  |
| 197 | pm6-pm33 | 1.031 | 1.012 | 1.138 | 1.016 | 0.013  | 0.399  |
| 198 | pm6-pm34 | 1.04  | 1.007 | 1.118 | 0.992 | -0.001 | 0.908  |
| 199 | pm6-pm35 | 1.026 | 1.006 | 1.081 | 1.012 | -0.01  | 0.424  |
| 200 | pm6-pm36 | 1.045 | 1.028 | 1.102 | 1.003 | 0.01   | 0.564  |
| 201 | pm6-pm37 | 1.046 | 1.027 | 1.116 | 1.005 | 0.01   | 0.317  |
| 202 | pm7-pm8  | 1.99  | 1.637 | 2.088 | 1.584 | -0.077 | 0.011  |
| 203 | pm7-pm9  | 1.994 | 1.588 | 2.136 | 1.638 | -0.099 | 0.013  |
| 204 | pm7-pm10 | 3.999 | 2.559 | 3.892 | 3.354 | 0.528  | <0.001 |



|     |          |       |       |       |       |        |       |
|-----|----------|-------|-------|-------|-------|--------|-------|
| 205 | pm7-pm11 | 1.953 | 1.633 | 2.11  | 1.632 | -0.077 | 0.013 |
| 206 | pm7-pm12 | 2.128 | 1.767 | 2.169 | 1.926 | -0.09  | 0.011 |
| 207 | pm7-pm13 | 1.942 | 1.559 | 2.048 | 1.578 | -0.13  | 0.005 |
| 208 | pm7-pm14 | 2.013 | 1.556 | 2.114 | 1.584 | -0.09  | 0.01  |
| 209 | pm7-pm15 | 1.976 | 1.589 | 2.047 | 1.564 | -0.116 | 0.007 |
| 210 | pm7-pm16 | 1.984 | 1.593 | 2.072 | 1.612 | -0.089 | 0.016 |
| 211 | pm7-pm17 | 1.995 | 1.535 | 2.121 | 1.601 | -0.092 | 0.019 |
| 212 | pm7-pm18 | 1.957 | 1.522 | 2.03  | 1.554 | -0.137 | 0.006 |
| 213 | pm7-pm19 | 1.96  | 1.54  | 2.127 | 1.57  | -0.104 | 0.008 |
| 214 | pm7-pm20 | 2.003 | 1.565 | 2.068 | 1.6   | -0.097 | 0.02  |
| 215 | pm7-pm21 | 2.141 | 1.931 | 2.79  | 1.616 | -0.045 | 0.151 |
| 216 | pm7-pm22 | 2.089 | 1.712 | 2.277 | 1.659 | -0.048 | 0.163 |
| 217 | pm7-pm23 | 2.075 | 1.827 | 2.22  | 1.657 | -0.081 | 0.019 |
| 218 | pm7-pm24 | 1.966 | 1.602 | 2.118 | 1.579 | -0.091 | 0.014 |
| 219 | pm7-pm25 | 1.952 | 1.523 | 2.093 | 1.596 | -0.113 | 0.007 |
| 220 | pm7-pm26 | 1.992 | 1.593 | 2.083 | 1.595 | -0.088 | 0.018 |
| 221 | pm7-pm27 | 1.976 | 1.544 | 2.097 | 1.641 | -0.111 | 0.009 |
| 222 | pm7-pm28 | 2.444 | 1.62  | 2.338 | 2.196 | -0.01  | 0.435 |
| 223 | pm7-pm29 | 2.073 | 1.85  | 2.041 | 1.698 | -0.066 | 0.021 |
| 224 | pm7-pm30 | 2.09  | 1.7   | 2.366 | 1.457 | 0.086  | 0.015 |
| 225 | pm7-pm31 | 2.021 | 1.676 | 2.101 | 1.623 | -0.072 | 0.016 |
| 226 | pm7-pm32 | 1.939 | 1.609 | 2.035 | 1.639 | -0.136 | 0.005 |
| 227 | pm7-pm33 | 1.962 | 1.532 | 2.078 | 1.586 | -0.114 | 0.006 |
| 228 | pm7-pm34 | 1.962 | 1.593 | 2.066 | 1.596 | -0.104 | 0.008 |
| 229 | pm7-pm35 | 1.987 | 1.535 | 2.09  | 1.59  | -0.108 | 0.007 |
| 230 | pm7-pm36 | 1.953 | 1.547 | 2.108 | 1.58  | -0.106 | 0.009 |
| 231 | pm7-pm37 | 1.972 | 1.55  | 2.093 | 1.598 | -0.103 | 0.007 |
| 232 | pm8-pm9  | 0.99  | 1.08  | 1.025 | 1.021 | -0.003 | 0.673 |
| 233 | pm8-pm10 | 2.268 | 2     | 2.162 | 2.042 | 0.102  | 0.008 |
| 234 | pm8-pm11 | 1.019 | 0.991 | 0.995 | 1.008 | 0.001  | 0.654 |

|     |          |       |       |       |       |        |       |
|-----|----------|-------|-------|-------|-------|--------|-------|
| 235 | pm8-pm12 | 1.077 | 1.165 | 1.031 | 1.206 | -0.061 | 0.026 |
| 236 | pm8-pm13 | 0.977 | 0.998 | 0.977 | 0.966 | -0.026 | 0.266 |
| 237 | pm8-pm14 | 0.998 | 1.053 | 0.982 | 0.986 | 0.005  | 0.499 |
| 238 | pm8-pm15 | 1.039 | 0.965 | 1.02  | 1.031 | 0.011  | 0.342 |
| 239 | pm8-pm16 | 0.996 | 1.036 | 1.032 | 0.992 | 0.016  | 0.376 |
| 240 | pm8-pm17 | 1.015 | 1.003 | 1.017 | 0.993 | 0.009  | 0.537 |
| 241 | pm8-pm18 | 1.01  | 0.989 | 0.976 | 1.015 | 0.001  | 0.855 |
| 242 | pm8-pm19 | 1.003 | 0.972 | 0.988 | 1.001 | -0.006 | 0.476 |
| 243 | pm8-pm20 | 0.982 | 1.029 | 0.994 | 1.016 | 0.006  | 0.522 |
| 244 | pm8-pm21 | 1.125 | 1.276 | 1.372 | 1.016 | -0.06  | 0.03  |
| 245 | pm8-pm22 | 1.074 | 1.168 | 1.105 | 1.044 | 0.022  | 0.201 |
| 246 | pm8-pm23 | 1.075 | 1.25  | 1.117 | 1.052 | 0.004  | 0.745 |
| 247 | pm8-pm24 | 0.968 | 1.007 | 1.014 | 1.002 | -0.003 | 0.986 |
| 248 | pm8-pm25 | 0.983 | 1.021 | 0.981 | 1     | -0.001 | 0.847 |
| 249 | pm8-pm26 | 0.996 | 0.998 | 0.977 | 1.003 | -0.003 | 0.853 |
| 250 | pm8-pm27 | 1.003 | 1.031 | 1.02  | 1.003 | -0.004 | 0.736 |
| 251 | pm8-pm28 | 1.232 | 1.077 | 1.092 | 1.346 | -0.066 | 0.029 |
| 252 | pm8-pm29 | 1.019 | 1.161 | 0.998 | 1.077 | -0.01  | 0.377 |
| 253 | pm8-pm30 | 0.938 | 0.893 | 0.949 | 0.923 | 0.016  | 0.304 |
| 254 | pm8-pm31 | 1.004 | 1.054 | 1.033 | 1.009 | 0.004  | 0.742 |
| 255 | pm8-pm32 | 0.977 | 1.113 | 1.013 | 1.025 | -0.003 | 0.935 |
| 256 | pm8-pm33 | 0.991 | 0.996 | 0.985 | 0.995 | -0.005 | 0.445 |
| 257 | pm8-pm34 | 0.986 | 1.039 | 1.008 | 0.981 | 0.003  | 0.8   |
| 258 | pm8-pm35 | 1.021 | 1.055 | 0.992 | 0.986 | 0.011  | 0.35  |
| 259 | pm8-pm36 | 0.992 | 1.006 | 1.011 | 1.004 | 0.007  | 0.505 |
| 260 | pm8-pm37 | 1.001 | 0.992 | 1.004 | 1.006 | 0.002  | 0.744 |
| 261 | pm9-pm10 | 2.292 | 2.022 | 2.194 | 2.06  | 0.089  | 0.017 |
| 262 | pm9-pm11 | 1.029 | 1.03  | 1.033 | 1.037 | -0.007 | 0.599 |
| 263 | pm9-pm12 | 1.162 | 1.182 | 1.083 | 1.259 | -0.046 | 0.198 |
| 264 | pm9-pm13 | 0.998 | 1.039 | 1.029 | 1.005 | -0.024 | 0.271 |

|     |           |       |       |       |       |        |       |
|-----|-----------|-------|-------|-------|-------|--------|-------|
| 265 | pm9-pm14  | 1.016 | 1.076 | 1.057 | 1.035 | 0.009  | 0.529 |
| 266 | pm9-pm15  | 1.022 | 1.038 | 1.075 | 1.019 | -0.001 | 0.807 |
| 267 | pm9-pm16  | 1.067 | 1.027 | 1.006 | 1.031 | -0.001 | 0.766 |
| 268 | pm9-pm17  | 1.019 | 1.059 | 1.06  | 0.99  | -0.003 | 0.609 |
| 269 | pm9-pm18  | 1.022 | 0.998 | 1.017 | 1.028 | -0.017 | 0.34  |
| 270 | pm9-pm19  | 1.028 | 1.029 | 1.02  | 1.045 | -0.003 | 0.766 |
| 271 | pm9-pm20  | 1.031 | 1.017 | 1.031 | 1.028 | -0.01  | 0.568 |
| 272 | pm9-pm21  | 1.151 | 1.349 | 1.413 | 1.042 | -0.056 | 0.027 |
| 273 | pm9-pm22  | 1.098 | 1.212 | 1.147 | 1.026 | 0.008  | 0.452 |
| 274 | pm9-pm23  | 1.097 | 1.293 | 1.136 | 1.041 | -0.015 | 0.37  |
| 275 | pm9-pm24  | 1.047 | 1.05  | 1.006 | 1.003 | -0.011 | 0.302 |
| 276 | pm9-pm25  | 1.056 | 1.022 | 1.047 | 1.019 | 0.002  | 0.681 |
| 277 | pm9-pm26  | 1.028 | 1.059 | 1.025 | 1.042 | 0.005  | 0.695 |
| 278 | pm9-pm27  | 1.032 | 1.059 | 1.048 | 1.039 | -0.011 | 0.354 |
| 279 | pm9-pm28  | 1.262 | 1.104 | 1.16  | 1.366 | -0.067 | 0.022 |
| 280 | pm9-pm29  | 1.038 | 1.199 | 1.049 | 1.101 | -0.014 | 0.312 |
| 281 | pm9-pm30  | 0.962 | 0.952 | 1.016 | 0.908 | 0.012  | 0.312 |
| 282 | pm9-pm31  | 1.046 | 1.102 | 1.058 | 1.019 | -0.001 | 0.719 |
| 283 | pm9-pm32  | 1.013 | 1.167 | 1.026 | 1.047 | -0.009 | 0.595 |
| 284 | pm9-pm33  | 1.03  | 1.067 | 1.038 | 1.006 | 0.001  | 0.699 |
| 285 | pm9-pm34  | 1.044 | 1.062 | 1.015 | 1.002 | -0.007 | 0.543 |
| 286 | pm9-pm35  | 1.015 | 1.063 | 1.037 | 0.993 | -0.012 | 0.389 |
| 287 | pm9-pm36  | 1.009 | 1.057 | 1.023 | 1.004 | -0.01  | 0.344 |
| 288 | pm9-pm37  | 1.033 | 1.066 | 1.031 | 1.013 | 0      | 0.902 |
| 289 | pm10-pm11 | 2.295 | 1.946 | 2.154 | 2.083 | 0.096  | 0.014 |
| 290 | pm10-pm12 | 2.2   | 1.992 | 1.922 | 2.437 | -0.065 | 0.044 |
| 291 | pm10-pm13 | 2.283 | 2     | 2.132 | 2.014 | 0.08   | 0.016 |
| 292 | pm10-pm14 | 2.262 | 1.861 | 2.064 | 2.222 | 0.081  | 0.018 |
| 293 | pm10-pm15 | 2.207 | 1.881 | 2.168 | 2.112 | 0.067  | 0.03  |
| 294 | pm10-pm16 | 2.005 | 1.756 | 1.854 | 2.016 | -0.111 | 0.006 |

|     |           |       |       |       |       |        |       |
|-----|-----------|-------|-------|-------|-------|--------|-------|
| 295 | pm10-pm17 | 2.314 | 1.971 | 2.113 | 2.049 | 0.092  | 0.014 |
| 296 | pm10-pm18 | 2.003 | 1.748 | 1.889 | 2.064 | -0.092 | 0.017 |
| 297 | pm10-pm19 | 2.166 | 1.89  | 2.071 | 2.278 | 0.083  | 0.013 |
| 298 | pm10-pm20 | 2.307 | 2.005 | 2.149 | 2.053 | 0.107  | 0.009 |
| 299 | pm10-pm21 | 2.214 | 2.142 | 2.587 | 2.074 | -0.025 | 0.283 |
| 300 | pm10-pm22 | 2.07  | 1.874 | 1.97  | 2.09  | -0.097 | 0.019 |
| 301 | pm10-pm23 | 2.107 | 1.96  | 2.037 | 2.129 | -0.083 | 0.013 |
| 302 | pm10-pm24 | 2.098 | 1.852 | 1.963 | 2.127 | -0.012 | 0.341 |
| 303 | pm10-pm25 | 2.109 | 1.754 | 1.996 | 2.149 | -0.016 | 0.329 |
| 304 | pm10-pm26 | 2.315 | 1.913 | 2.189 | 2.073 | 0.104  | 0.009 |
| 305 | pm10-pm27 | 2.051 | 1.736 | 1.876 | 2.07  | -0.107 | 0.005 |
| 306 | pm10-pm28 | 2.401 | 1.714 | 2.069 | 2.725 | -0.047 | 0.184 |
| 307 | pm10-pm29 | 2.018 | 1.908 | 1.887 | 2.206 | -0.091 | 0.017 |
| 308 | pm10-pm30 | 2.138 | 1.982 | 2.073 | 1.838 | 0.076  | 0.013 |
| 309 | pm10-pm31 | 2.029 | 1.712 | 1.89  | 2.098 | -0.11  | 0.01  |
| 310 | pm10-pm32 | 2.166 | 1.953 | 2.084 | 2.319 | 0.074  | 0.017 |
| 311 | pm10-pm33 | 2.264 | 1.949 | 2.167 | 2.009 | 0.079  | 0.017 |
| 312 | pm10-pm34 | 2.29  | 2.022 | 2.147 | 2.066 | 0.108  | 0.009 |
| 313 | pm10-pm35 | 2.302 | 1.998 | 2.093 | 2.057 | 0.089  | 0.019 |
| 314 | pm10-pm36 | 2.268 | 2.002 | 2.171 | 2.016 | 0.096  | 0.013 |
| 315 | pm10-pm37 | 2.292 | 1.985 | 2.196 | 2.012 | 0.1    | 0.008 |
| 316 | pm11-pm12 | 1.099 | 1.182 | 1.041 | 1.263 | -0.042 | 0.162 |
| 317 | pm11-pm13 | 0.987 | 1.05  | 1.008 | 0.977 | -0.007 | 0.509 |
| 318 | pm11-pm14 | 1.02  | 1.066 | 1.035 | 1.005 | 0.025  | 0.289 |
| 319 | pm11-pm15 | 1.016 | 1.013 | 0.983 | 1.016 | -0.004 | 0.986 |
| 320 | pm11-pm16 | 0.993 | 1.045 | 1.004 | 1.043 | 0.016  | 0.312 |
| 321 | pm11-pm17 | 0.982 | 0.995 | 0.981 | 0.971 | -0.024 | 0.238 |
| 322 | pm11-pm18 | 1.003 | 0.971 | 1.006 | 1.027 | -0.002 | 0.871 |
| 323 | pm11-pm19 | 0.965 | 0.985 | 1.009 | 0.982 | -0.019 | 0.327 |
| 324 | pm11-pm20 | 1     | 1.018 | 0.995 | 0.992 | -0.006 | 0.558 |

|     |           |       |       |       |       |        |       |
|-----|-----------|-------|-------|-------|-------|--------|-------|
| 325 | pm11-pm21 | 1.096 | 1.277 | 1.351 | 1.011 | -0.082 | 0.02  |
| 326 | pm11-pm22 | 1.042 | 1.184 | 1.093 | 1.04  | 0.006  | 0.486 |
| 327 | pm11-pm23 | 1.078 | 1.258 | 1.14  | 1.054 | 0.006  | 0.478 |
| 328 | pm11-pm24 | 0.994 | 1.021 | 1.003 | 1.001 | -0.004 | 0.875 |
| 329 | pm11-pm25 | 0.997 | 1.017 | 1.008 | 1.015 | 0.005  | 0.532 |
| 330 | pm11-pm26 | 0.991 | 0.987 | 1.01  | 1.02  | -0.002 | 0.706 |
| 331 | pm11-pm27 | 1.03  | 1.041 | 1.026 | 1.009 | 0      | 0.737 |
| 332 | pm11-pm28 | 1.233 | 1.058 | 1.103 | 1.349 | -0.075 | 0.019 |
| 333 | pm11-pm29 | 1.005 | 1.187 | 0.98  | 1.068 | -0.022 | 0.294 |
| 334 | pm11-pm30 | 0.933 | 0.864 | 0.982 | 0.911 | 0.005  | 0.4   |
| 335 | pm11-pm31 | 1.023 | 1.048 | 1.026 | 1.009 | -0.002 | 0.785 |
| 336 | pm11-pm32 | 0.981 | 1.128 | 1.007 | 1.047 | -0.002 | 0.884 |
| 337 | pm11-pm33 | 1.015 | 1.003 | 0.981 | 1.043 | 0.006  | 0.51  |
| 338 | pm11-pm34 | 1.012 | 1.046 | 1.013 | 0.994 | 0.008  | 0.542 |
| 339 | pm11-pm35 | 0.969 | 1.004 | 1.016 | 1     | -0.013 | 0.348 |
| 340 | pm11-pm36 | 0.977 | 0.964 | 1     | 1.027 | -0.011 | 0.387 |
| 341 | pm11-pm37 | 0.984 | 0.956 | 0.993 | 1.042 | -0.013 | 0.334 |
| 342 | pm12-pm13 | 1.098 | 1.182 | 1.003 | 1.234 | -0.062 | 0.025 |
| 343 | pm12-pm14 | 1.094 | 1.196 | 1.075 | 1.234 | -0.036 | 0.249 |
| 344 | pm12-pm15 | 1.11  | 1.139 | 1.033 | 1.28  | -0.048 | 0.182 |
| 345 | pm12-pm16 | 1.138 | 1.229 | 1.055 | 1.223 | -0.022 | 0.281 |
| 346 | pm12-pm17 | 1.113 | 1.237 | 1.031 | 1.225 | -0.033 | 0.298 |
| 347 | pm12-pm18 | 1.088 | 1.185 | 1.038 | 1.227 | -0.047 | 0.186 |
| 348 | pm12-pm19 | 1.087 | 1.163 | 1.027 | 1.205 | -0.062 | 0.041 |
| 349 | pm12-pm20 | 1.111 | 1.139 | 1.039 | 1.195 | -0.064 | 0.041 |
| 350 | pm12-pm21 | 1.267 | 1.525 | 1.414 | 1.249 | -0.08  | 0.014 |
| 351 | pm12-pm22 | 1.167 | 1.342 | 1.155 | 1.249 | -0.034 | 0.254 |
| 352 | pm12-pm23 | 1.193 | 1.42  | 1.137 | 1.304 | -0.041 | 0.198 |
| 353 | pm12-pm24 | 1.095 | 1.156 | 1.041 | 1.233 | -0.055 | 0.028 |
| 354 | pm12-pm25 | 1.119 | 1.163 | 1.051 | 1.224 | -0.043 | 0.192 |

|     |           |       |       |       |       |        |       |
|-----|-----------|-------|-------|-------|-------|--------|-------|
| 355 | pm12-pm26 | 1.103 | 1.17  | 1.037 | 1.197 | -0.056 | 0.029 |
| 356 | pm12-pm27 | 1.118 | 1.184 | 1.061 | 1.257 | -0.049 | 0.152 |
| 357 | pm12-pm28 | 1.377 | 1.232 | 1.19  | 1.636 | -0.08  | 0.011 |
| 358 | pm12-pm29 | 1.126 | 1.411 | 1.06  | 1.297 | -0.036 | 0.254 |
| 359 | pm12-pm30 | 1.042 | 1.054 | 0.938 | 1.146 | -0.051 | 0.033 |
| 360 | pm12-pm31 | 1.117 | 1.206 | 1.089 | 1.238 | -0.044 | 0.19  |
| 361 | pm12-pm32 | 1.097 | 1.303 | 1.016 | 1.291 | -0.044 | 0.184 |
| 362 | pm12-pm33 | 1.08  | 1.125 | 1.051 | 1.217 | -0.065 | 0.024 |
| 363 | pm12-pm34 | 1.137 | 1.201 | 1.055 | 1.165 | -0.047 | 0.177 |
| 364 | pm12-pm35 | 1.077 | 1.24  | 1.05  | 1.191 | -0.049 | 0.153 |
| 365 | pm12-pm36 | 1.1   | 1.151 | 1.031 | 1.199 | -0.062 | 0.035 |
| 366 | pm12-pm37 | 1.093 | 1.15  | 1.014 | 1.226 | -0.064 | 0.024 |
| 367 | pm13-pm14 | 0.992 | 1.026 | 0.995 | 1.013 | -0.004 | 0.937 |
| 368 | pm13-pm15 | 0.993 | 0.976 | 1.009 | 1.001 | -0.019 | 0.302 |
| 369 | pm13-pm16 | 1.007 | 0.973 | 1.005 | 0.99  | -0.014 | 0.327 |
| 370 | pm13-pm17 | 0.959 | 1.002 | 0.979 | 0.971 | -0.031 | 0.242 |
| 371 | pm13-pm18 | 0.989 | 1.03  | 0.975 | 0.982 | -0.013 | 0.382 |
| 372 | pm13-pm19 | 1.027 | 1.019 | 1.008 | 0.959 | -0.004 | 0.997 |
| 373 | pm13-pm20 | 1.027 | 1.022 | 1.002 | 1.013 | 0.006  | 0.407 |
| 374 | pm13-pm21 | 1.082 | 1.313 | 1.37  | 0.991 | -0.079 | 0.015 |
| 375 | pm13-pm22 | 1.03  | 1.139 | 1.093 | 0.989 | -0.024 | 0.247 |
| 376 | pm13-pm23 | 1.086 | 1.203 | 1.107 | 1.042 | -0.02  | 0.228 |
| 377 | pm13-pm24 | 0.986 | 1.027 | 1.001 | 1.017 | -0.003 | 0.786 |
| 378 | pm13-pm25 | 0.994 | 1.045 | 0.995 | 0.992 | -0.001 | 0.623 |
| 379 | pm13-pm26 | 0.989 | 1.03  | 0.99  | 0.963 | -0.014 | 0.305 |
| 380 | pm13-pm27 | 0.979 | 1.074 | 1.008 | 0.998 | -0.015 | 0.373 |
| 381 | pm13-pm28 | 1.248 | 1.137 | 1.132 | 1.346 | -0.047 | 0.161 |
| 382 | pm13-pm29 | 0.972 | 1.112 | 0.978 | 1.058 | -0.055 | 0.023 |
| 383 | pm13-pm30 | 0.902 | 0.893 | 0.931 | 0.898 | -0.015 | 0.336 |
| 384 | pm13-pm31 | 1.016 | 1.048 | 1.022 | 0.989 | -0.012 | 0.347 |

|     |           |       |       |       |       |        |       |
|-----|-----------|-------|-------|-------|-------|--------|-------|
| 385 | pm13-pm32 | 0.974 | 1.15  | 1.01  | 1.016 | -0.008 | 0.402 |
| 386 | pm13-pm33 | 0.999 | 1.063 | 0.994 | 1.009 | 0.009  | 0.516 |
| 387 | pm13-pm34 | 1.004 | 0.999 | 0.992 | 0.962 | -0.023 | 0.27  |
| 388 | pm13-pm35 | 0.956 | 1.005 | 0.996 | 0.942 | -0.038 | 0.266 |
| 389 | pm13-pm36 | 0.981 | 1.038 | 1.008 | 1.011 | 0.003  | 0.971 |
| 390 | pm13-pm37 | 0.996 | 1.06  | 1.009 | 0.98  | 0.002  | 0.728 |
| 391 | pm14-pm15 | 1.023 | 0.978 | 1.004 | 0.981 | -0.011 | 0.387 |
| 392 | pm14-pm16 | 0.971 | 0.99  | 1.002 | 0.962 | -0.021 | 0.223 |
| 393 | pm14-pm17 | 1.015 | 0.982 | 1.004 | 0.972 | -0.01  | 0.44  |
| 394 | pm14-pm18 | 1.021 | 1.038 | 1.017 | 0.977 | 0.012  | 0.334 |
| 395 | pm14-pm19 | 1.021 | 1.044 | 1.007 | 0.967 | 0.008  | 0.507 |
| 396 | pm14-pm20 | 0.981 | 1.036 | 0.999 | 0.989 | -0.003 | 0.912 |
| 397 | pm14-pm21 | 1.11  | 1.341 | 1.401 | 1.013 | -0.047 | 0.177 |
| 398 | pm14-pm22 | 1.075 | 1.144 | 1.088 | 1.024 | 0.002  | 0.637 |
| 399 | pm14-pm23 | 1.053 | 1.197 | 1.117 | 1.016 | -0.028 | 0.279 |
| 400 | pm14-pm24 | 1     | 1.055 | 0.986 | 1.001 | 0.005  | 0.766 |
| 401 | pm14-pm25 | 1.013 | 1.056 | 1.023 | 1.011 | 0.024  | 0.295 |
| 402 | pm14-pm26 | 0.989 | 1.02  | 1.031 | 1.011 | 0.011  | 0.383 |
| 403 | pm14-pm27 | 1.018 | 1.031 | 1.027 | 1.003 | -0.004 | 0.763 |
| 404 | pm14-pm28 | 1.257 | 1.138 | 1.108 | 1.33  | -0.049 | 0.159 |
| 405 | pm14-pm29 | 0.977 | 1.141 | 0.98  | 1.02  | -0.05  | 0.164 |
| 406 | pm14-pm30 | 0.921 | 0.867 | 0.941 | 0.896 | -0.009 | 0.468 |
| 407 | pm14-pm31 | 1.032 | 1.119 | 1.021 | 1     | 0.018  | 0.31  |
| 408 | pm14-pm32 | 0.993 | 1.165 | 0.999 | 1.031 | 0.007  | 0.502 |
| 409 | pm14-pm33 | 0.986 | 1.032 | 1.011 | 1.016 | 0.009  | 0.582 |
| 410 | pm14-pm34 | 0.993 | 1.036 | 1.011 | 0.994 | 0.002  | 0.86  |
| 411 | pm14-pm35 | 0.978 | 0.991 | 1.026 | 0.993 | -0.01  | 0.328 |
| 412 | pm14-pm36 | 1.004 | 1.019 | 1.019 | 1.006 | 0.011  | 0.385 |
| 413 | pm14-pm37 | 0.995 | 1.023 | 0.997 | 0.994 | -0.002 | 0.745 |
| 414 | pm15-pm16 | 1.01  | 1.007 | 0.983 | 0.993 | -0.007 | 0.489 |

|     |           |       |       |       |       |        |       |
|-----|-----------|-------|-------|-------|-------|--------|-------|
| 415 | pm15-pm17 | 0.987 | 1.01  | 1.024 | 0.977 | -0.007 | 0.498 |
| 416 | pm15-pm18 | 0.966 | 1.018 | 1.038 | 0.983 | -0.003 | 0.787 |
| 417 | pm15-pm19 | 0.997 | 0.998 | 1.012 | 1.013 | 0      | 0.733 |
| 418 | pm15-pm20 | 1.001 | 1.049 | 1.029 | 0.968 | 0.004  | 0.818 |
| 419 | pm15-pm21 | 1.117 | 1.267 | 1.385 | 1.042 | -0.063 | 0.029 |
| 420 | pm15-pm22 | 1.059 | 1.115 | 1.106 | 1.007 | -0.012 | 0.37  |
| 421 | pm15-pm23 | 1.058 | 1.259 | 1.096 | 1.004 | -0.023 | 0.268 |
| 422 | pm15-pm24 | 1.006 | 1.021 | 1.005 | 1.018 | 0.004  | 0.802 |
| 423 | pm15-pm25 | 0.979 | 1.055 | 1.016 | 0.989 | 0.005  | 0.735 |
| 424 | pm15-pm26 | 1.004 | 1.034 | 1.035 | 1.006 | 0.015  | 0.311 |
| 425 | pm15-pm27 | 1     | 1.063 | 1.013 | 1.015 | -0.004 | 0.962 |
| 426 | pm15-pm28 | 1.235 | 1.108 | 1.187 | 1.313 | -0.05  | 0.168 |
| 427 | pm15-pm29 | 1.005 | 1.109 | 0.97  | 1.076 | -0.042 | 0.15  |
| 428 | pm15-pm30 | 0.9   | 0.894 | 1.011 | 0.886 | 0.004  | 0.778 |
| 429 | pm15-pm31 | 1.033 | 1.061 | 1.074 | 1.024 | 0.019  | 0.38  |
| 430 | pm15-pm32 | 0.989 | 1.103 | 1.028 | 1.023 | -0.007 | 0.523 |
| 431 | pm15-pm33 | 0.985 | 1.004 | 1.035 | 1.006 | 0.002  | 0.957 |
| 432 | pm15-pm34 | 1.002 | 0.991 | 0.984 | 0.978 | -0.021 | 0.291 |
| 433 | pm15-pm35 | 0.974 | 0.978 | 1.001 | 0.975 | -0.028 | 0.237 |
| 434 | pm15-pm36 | 0.968 | 1.014 | 1.018 | 1.016 | -0.001 | 0.836 |
| 435 | pm15-pm37 | 0.998 | 1.022 | 1.012 | 1.011 | 0.003  | 0.622 |
| 436 | pm16-pm17 | 0.968 | 1.011 | 1.002 | 0.979 | -0.011 | 0.367 |
| 437 | pm16-pm18 | 1.004 | 0.984 | 1.017 | 0.991 | 0      | 0.972 |
| 438 | pm16-pm19 | 1.013 | 0.994 | 1.042 | 1.004 | 0.014  | 0.375 |
| 439 | pm16-pm20 | 1.006 | 0.997 | 1.01  | 0.975 | -0.005 | 0.483 |
| 440 | pm16-pm21 | 1.105 | 1.325 | 1.371 | 1.053 | -0.047 | 0.201 |
| 441 | pm16-pm22 | 1.044 | 1.166 | 1.073 | 1.03  | -0.001 | 0.677 |
| 442 | pm16-pm23 | 1.089 | 1.216 | 1.113 | 1.009 | -0.015 | 0.333 |
| 443 | pm16-pm24 | 1.008 | 1.032 | 1.055 | 0.971 | 0.013  | 0.318 |
| 444 | pm16-pm25 | 1.021 | 0.855 | 1.012 | 1.189 | 0.02   | 0.397 |



|     |           |       |       |       |       |        |       |
|-----|-----------|-------|-------|-------|-------|--------|-------|
| 445 | pm16-pm26 | 0.938 | 0.853 | 0.794 | 0.996 | -0.105 | 0.009 |
| 446 | pm16-pm27 | 1.022 | 1.073 | 1.025 | 0.992 | 0.006  | 0.582 |
| 447 | pm16-pm28 | 1.228 | 1.129 | 1.138 | 1.357 | -0.042 | 0.158 |
| 448 | pm16-pm29 | 1.046 | 1.174 | 0.938 | 1.051 | -0.025 | 0.297 |
| 449 | pm16-pm30 | 0.896 | 0.812 | 0.964 | 0.923 | -0.014 | 0.331 |
| 450 | pm16-pm31 | 0.987 | 1.067 | 1.045 | 0.994 | 0      | 0.963 |
| 451 | pm16-pm32 | 0.998 | 1.122 | 1.036 | 1.058 | 0.016  | 0.382 |
| 452 | pm16-pm33 | 0.991 | 1.032 | 0.984 | 1.014 | 0.005  | 0.481 |
| 453 | pm16-pm34 | 1.015 | 0.966 | 1.007 | 0.983 | -0.011 | 0.304 |
| 454 | pm16-pm35 | 0.978 | 0.985 | 1.015 | 0.982 | -0.015 | 0.386 |
| 455 | pm16-pm36 | 0.968 | 1.003 | 1.012 | 0.984 | -0.007 | 0.541 |
| 456 | pm16-pm37 | 1.002 | 1.013 | 1.01  | 1.023 | 0.01   | 0.383 |
| 457 | pm17-pm18 | 1     | 0.981 | 1.007 | 0.974 | -0.009 | 0.503 |
| 458 | pm17-pm19 | 0.996 | 1.04  | 1.011 | 0.992 | 0.009  | 0.599 |
| 459 | pm17-pm20 | 0.984 | 1.015 | 0.99  | 0.982 | -0.01  | 0.346 |
| 460 | pm17-pm21 | 1.109 | 1.257 | 1.382 | 0.986 | -0.078 | 0.015 |
| 461 | pm17-pm22 | 1.023 | 1.076 | 1.073 | 0.997 | -0.037 | 0.231 |
| 462 | pm17-pm23 | 1.072 | 1.174 | 1.126 | 1     | -0.03  | 0.296 |
| 463 | pm17-pm24 | 1.016 | 1.012 | 1.024 | 0.983 | 0.004  | 0.943 |
| 464 | pm17-pm25 | 1.022 | 1.002 | 0.991 | 0.995 | 0.002  | 0.792 |
| 465 | pm17-pm26 | 0.983 | 1.01  | 0.995 | 0.974 | -0.01  | 0.387 |
| 466 | pm17-pm27 | 0.996 | 0.992 | 1.032 | 0.979 | -0.023 | 0.216 |
| 467 | pm17-pm28 | 1.217 | 1.083 | 1.175 | 1.353 | -0.049 | 0.163 |
| 468 | pm17-pm29 | 0.971 | 1.206 | 0.971 | 1.014 | -0.037 | 0.235 |
| 469 | pm17-pm30 | 0.888 | 0.857 | 0.929 | 0.863 | -0.03  | 0.2   |
| 470 | pm17-pm31 | 0.996 | 1.029 | 1.03  | 0.983 | -0.015 | 0.368 |
| 471 | pm17-pm32 | 0.979 | 1.175 | 1.011 | 1.006 | 0.004  | 0.771 |
| 472 | pm17-pm33 | 0.985 | 0.99  | 1.008 | 0.973 | -0.012 | 0.372 |
| 473 | pm17-pm34 | 0.991 | 0.949 | 0.998 | 0.969 | -0.028 | 0.219 |
| 474 | pm17-pm35 | 0.992 | 0.95  | 1.015 | 0.978 | -0.022 | 0.256 |

|     |           |       |       |       |       |        |       |
|-----|-----------|-------|-------|-------|-------|--------|-------|
| 475 | pm17-pm36 | 0.996 | 0.978 | 1.018 | 0.95  | -0.014 | 0.392 |
| 476 | pm17-pm37 | 0.978 | 1.023 | 1.001 | 0.991 | -0.004 | 0.832 |
| 477 | pm18-pm19 | 0.984 | 1.009 | 0.994 | 0.991 | -0.003 | 0.996 |
| 478 | pm18-pm20 | 0.987 | 1.009 | 1.008 | 1.012 | 0.003  | 0.622 |
| 479 | pm18-pm21 | 1.098 | 1.237 | 1.418 | 1.034 | -0.062 | 0.04  |
| 480 | pm18-pm22 | 1.039 | 1.181 | 1.083 | 1.004 | -0.001 | 0.751 |
| 481 | pm18-pm23 | 1.102 | 1.227 | 1.129 | 1.064 | 0.01   | 0.563 |
| 482 | pm18-pm24 | 0.984 | 1.015 | 0.979 | 1.003 | -0.007 | 0.43  |
| 483 | pm18-pm25 | 0.996 | 1.015 | 0.986 | 0.981 | -0.004 | 0.902 |
| 484 | pm18-pm26 | 0.981 | 0.993 | 1     | 1.016 | -0.001 | 0.721 |
| 485 | pm18-pm27 | 0.997 | 1.035 | 1.014 | 1.011 | -0.006 | 0.455 |
| 486 | pm18-pm28 | 1.233 | 1.11  | 1.108 | 1.406 | -0.039 | 0.204 |
| 487 | pm18-pm29 | 1.017 | 1.226 | 0.965 | 1.041 | -0.013 | 0.307 |
| 488 | pm18-pm30 | 0.926 | 0.882 | 0.972 | 0.887 | 0.005  | 0.448 |
| 489 | pm18-pm31 | 1.019 | 1.016 | 1.033 | 1.021 | 0      | 0.957 |
| 490 | pm18-pm32 | 0.997 | 1.159 | 1.002 | 1.023 | 0.009  | 0.466 |
| 491 | pm18-pm33 | 0.991 | 1.019 | 0.983 | 0.987 | -0.003 | 0.737 |
| 492 | pm18-pm34 | 1.005 | 1.044 | 0.984 | 0.991 | 0.004  | 0.672 |
| 493 | pm18-pm35 | 0.985 | 1.013 | 0.987 | 0.972 | -0.014 | 0.354 |
| 494 | pm18-pm36 | 1.003 | 0.986 | 0.985 | 1.011 | -0.001 | 0.991 |
| 495 | pm18-pm37 | 1.015 | 1.014 | 1.015 | 1.026 | 0.017  | 0.391 |
| 496 | pm19-pm20 | 1.006 | 0.996 | 1.012 | 1.014 | 0.006  | 0.509 |
| 497 | pm19-pm21 | 1.107 | 1.287 | 1.371 | 1.007 | -0.067 | 0.022 |
| 498 | pm19-pm22 | 1.04  | 1.156 | 1.099 | 1.038 | 0.005  | 0.559 |
| 499 | pm19-pm23 | 1.073 | 1.207 | 1.104 | 1.032 | -0.017 | 0.307 |
| 500 | pm19-pm24 | 0.979 | 1.045 | 1.007 | 1.014 | 0.009  | 0.477 |
| 501 | pm19-pm25 | 1.001 | 0.984 | 0.992 | 0.987 | -0.008 | 0.582 |
| 502 | pm19-pm26 | 0.992 | 0.996 | 1.003 | 0.988 | -0.004 | 0.616 |
| 503 | pm19-pm27 | 1.03  | 1.007 | 1.042 | 1.027 | 0.006  | 0.529 |
| 504 | pm19-pm28 | 1.208 | 1.094 | 1.127 | 1.32  | -0.067 | 0.042 |

|     |           |       |       |       |       |        |       |
|-----|-----------|-------|-------|-------|-------|--------|-------|
| 505 | pm19-pm29 | 1.039 | 1.24  | 1.026 | 1.063 | 0.016  | 0.3   |
| 506 | pm19-pm30 | 0.917 | 0.88  | 0.969 | 0.895 | 0.003  | 0.688 |
| 507 | pm19-pm31 | 1.021 | 1.028 | 1.032 | 0.995 | -0.003 | 0.794 |
| 508 | pm19-pm32 | 0.978 | 1.137 | 0.988 | 1.038 | -0.001 | 0.996 |
| 509 | pm19-pm33 | 1.006 | 1.017 | 0.99  | 1.014 | 0.008  | 0.451 |
| 510 | pm19-pm34 | 0.974 | 1.03  | 1.025 | 0.986 | 0.001  | 0.886 |
| 511 | pm19-pm35 | 1.036 | 1.014 | 0.981 | 1.009 | 0.006  | 0.583 |
| 512 | pm19-pm36 | 1.003 | 0.996 | 1.016 | 1.017 | 0.01   | 0.313 |
| 513 | pm19-pm37 | 1.014 | 0.979 | 1.008 | 1.03  | 0.007  | 0.404 |
| 514 | pm20-pm21 | 1.115 | 1.218 | 1.393 | 1.022 | -0.075 | 0.014 |
| 515 | pm20-pm22 | 1.082 | 1.153 | 1.089 | 1.01  | 0.003  | 0.717 |
| 516 | pm20-pm23 | 1.076 | 1.244 | 1.094 | 1.05  | -0.008 | 0.58  |
| 517 | pm20-pm24 | 1.017 | 1.012 | 0.979 | 1     | -0.003 | 0.869 |
| 518 | pm20-pm25 | 1.003 | 1.024 | 0.993 | 0.979 | -0.002 | 0.744 |
| 519 | pm20-pm26 | 0.979 | 0.982 | 1.016 | 0.973 | -0.014 | 0.392 |
| 520 | pm20-pm27 | 1.028 | 1.064 | 1.03  | 1.041 | 0.018  | 0.335 |
| 521 | pm20-pm28 | 1.228 | 1.062 | 1.151 | 1.363 | -0.056 | 0.035 |
| 522 | pm20-pm29 | 1.055 | 1.178 | 1.011 | 1.099 | 0.007  | 0.586 |
| 523 | pm20-pm30 | 0.906 | 0.889 | 0.964 | 0.874 | -0.007 | 0.547 |
| 524 | pm20-pm31 | 1.025 | 1.019 | 1.032 | 1.028 | 0.001  | 0.983 |
| 525 | pm20-pm32 | 1.007 | 1.133 | 0.983 | 1.032 | -0.001 | 0.827 |
| 526 | pm20-pm33 | 0.984 | 1.028 | 1.003 | 0.987 | -0.001 | 0.737 |
| 527 | pm20-pm34 | 0.989 | 1.06  | 1.005 | 1.005 | 0.009  | 0.529 |
| 528 | pm20-pm35 | 1.005 | 1.018 | 0.977 | 0.987 | -0.01  | 0.342 |
| 529 | pm20-pm36 | 1.013 | 1.019 | 0.981 | 0.984 | -0.002 | 0.822 |
| 530 | pm20-pm37 | 1.019 | 1     | 0.993 | 1.01  | 0.002  | 0.843 |
| 531 | pm21-pm22 | 1.192 | 1.397 | 1.468 | 1.043 | -0.064 | 0.044 |
| 532 | pm21-pm23 | 1.182 | 1.537 | 1.539 | 1.076 | -0.049 | 0.201 |
| 533 | pm21-pm24 | 1.131 | 1.305 | 1.392 | 1.021 | -0.051 | 0.037 |
| 534 | pm21-pm25 | 1.133 | 1.306 | 1.382 | 1.012 | -0.052 | 0.039 |

|     |           |       |       |       |       |        |       |
|-----|-----------|-------|-------|-------|-------|--------|-------|
| 535 | pm21-pm26 | 1.083 | 1.267 | 1.383 | 1.023 | -0.071 | 0.015 |
| 536 | pm21-pm27 | 1.081 | 1.26  | 1.388 | 1.037 | -0.09  | 0.015 |
| 537 | pm21-pm28 | 1.382 | 1.337 | 1.517 | 1.38  | -0.112 | 0.007 |
| 538 | pm21-pm29 | 1.119 | 1.495 | 1.409 | 1.103 | -0.056 | 0.022 |
| 539 | pm21-pm30 | 1.036 | 1.169 | 1.344 | 0.91  | -0.059 | 0.043 |
| 540 | pm21-pm31 | 1.154 | 1.346 | 1.367 | 1.045 | -0.056 | 0.039 |
| 541 | pm21-pm32 | 1.104 | 1.437 | 1.361 | 1.051 | -0.059 | 0.025 |
| 542 | pm21-pm33 | 1.149 | 1.266 | 1.392 | 1.03  | -0.051 | 0.033 |
| 543 | pm21-pm34 | 1.112 | 1.295 | 1.348 | 0.996 | -0.076 | 0.012 |
| 544 | pm21-pm35 | 1.136 | 1.29  | 1.395 | 1.062 | -0.044 | 0.163 |
| 545 | pm21-pm36 | 1.1   | 1.28  | 1.378 | 1.019 | -0.065 | 0.025 |
| 546 | pm21-pm37 | 1.133 | 1.316 | 1.339 | 1.008 | -0.063 | 0.035 |
| 547 | pm22-pm23 | 1.384 | 1.546 | 1.414 | 1.037 | 0.145  | 0.009 |
| 548 | pm22-pm24 | 1.051 | 1.229 | 1.102 | 1.019 | 0.018  | 0.373 |
| 549 | pm22-pm25 | 1.045 | 1.103 | 1.133 | 1.011 | -0.005 | 0.511 |
| 550 | pm22-pm26 | 1.038 | 1.17  | 1.114 | 1.014 | 0.006  | 0.464 |
| 551 | pm22-pm27 | 1.034 | 1.195 | 1.112 | 1.027 | -0.008 | 0.474 |
| 552 | pm22-pm28 | 1.304 | 1.246 | 1.287 | 1.42  | -0.02  | 0.375 |
| 553 | pm22-pm29 | 1.107 | 1.277 | 1.053 | 1.059 | -0.031 | 0.233 |
| 554 | pm22-pm30 | 0.939 | 1.012 | 1.042 | 0.934 | -0.01  | 0.485 |
| 555 | pm22-pm31 | 1.048 | 1.21  | 1.104 | 1.028 | -0.004 | 0.689 |
| 556 | pm22-pm32 | 1.054 | 1.271 | 1.068 | 1.066 | -0.002 | 0.86  |
| 557 | pm22-pm33 | 1.058 | 1.149 | 1.065 | 1.006 | -0.009 | 0.486 |
| 558 | pm22-pm34 | 1.061 | 1.168 | 1.074 | 1.03  | 0.001  | 0.654 |
| 559 | pm22-pm35 | 1.039 | 1.097 | 1.083 | 1.027 | -0.022 | 0.247 |
| 560 | pm22-pm36 | 1.037 | 1.15  | 1.112 | 1.006 | -0.001 | 0.624 |
| 561 | pm22-pm37 | 1.052 | 1.126 | 1.129 | 1.017 | 0.001  | 0.997 |
| 562 | pm23-pm24 | 1.125 | 1.271 | 1.092 | 1.036 | 0.006  | 0.481 |
| 563 | pm23-pm25 | 1.066 | 1.272 | 1.089 | 1.009 | -0.012 | 0.393 |
| 564 | pm23-pm26 | 1.121 | 1.279 | 1.1   | 1.035 | 0.012  | 0.323 |

|     |           |       |       |       |       |        |       |
|-----|-----------|-------|-------|-------|-------|--------|-------|
| 565 | pm23-pm27 | 1.112 | 1.263 | 1.137 | 1.036 | -0.006 | 0.495 |
| 566 | pm23-pm28 | 1.349 | 1.398 | 1.244 | 1.39  | -0.032 | 0.243 |
| 567 | pm23-pm29 | 1.073 | 1.417 | 1.054 | 1.085 | -0.041 | 0.157 |
| 568 | pm23-pm30 | 0.961 | 1.114 | 1.051 | 0.917 | -0.024 | 0.237 |
| 569 | pm23-pm31 | 1.083 | 1.292 | 1.106 | 1.055 | -0.011 | 0.39  |
| 570 | pm23-pm32 | 1.09  | 1.382 | 1.106 | 1.09  | 0.008  | 0.485 |
| 571 | pm23-pm33 | 1.06  | 1.257 | 1.117 | 1.009 | -0.011 | 0.32  |
| 572 | pm23-pm34 | 1.045 | 1.279 | 1.091 | 1.028 | -0.015 | 0.362 |
| 573 | pm23-pm35 | 1.061 | 1.231 | 1.098 | 1.017 | -0.025 | 0.3   |
| 574 | pm23-pm36 | 1.11  | 1.214 | 1.124 | 1.053 | 0.005  | 0.943 |
| 575 | pm23-pm37 | 1.053 | 1.297 | 1.131 | 1.05  | 0.009  | 0.42  |
| 576 | pm24-pm25 | 1.017 | 0.976 | 1.011 | 1.002 | -0.001 | 0.753 |
| 577 | pm24-pm26 | 0.997 | 1.062 | 0.987 | 1.011 | 0.011  | 0.349 |
| 578 | pm24-pm27 | 0.988 | 1.078 | 1.037 | 0.981 | -0.004 | 0.713 |
| 579 | pm24-pm28 | 1.24  | 1.125 | 1.176 | 1.327 | -0.042 | 0.181 |
| 580 | pm24-pm29 | 1.01  | 1.158 | 1.031 | 1.035 | -0.022 | 0.294 |
| 581 | pm24-pm30 | 0.919 | 0.913 | 0.96  | 0.88  | 0.002  | 0.952 |
| 582 | pm24-pm31 | 1.017 | 1.057 | 1.044 | 0.996 | 0.002  | 0.684 |
| 583 | pm24-pm32 | 0.983 | 1.145 | 1.014 | 1.031 | 0.002  | 0.707 |
| 584 | pm24-pm33 | 0.968 | 0.993 | 0.995 | 0.995 | -0.016 | 0.389 |
| 585 | pm24-pm34 | 1.01  | 1.048 | 0.989 | 1.009 | 0.007  | 0.555 |
| 586 | pm24-pm35 | 1.021 | 1     | 1.015 | 0.972 | -0.006 | 0.518 |
| 587 | pm24-pm36 | 0.974 | 1     | 0.992 | 0.994 | -0.012 | 0.36  |
| 588 | pm24-pm37 | 1.005 | 1.009 | 1.021 | 1.003 | 0.004  | 0.841 |
| 589 | pm25-pm26 | 1.001 | 0.98  | 1.016 | 1.015 | 0.004  | 0.653 |
| 590 | pm25-pm27 | 1.011 | 1.007 | 1.04  | 0.998 | -0.007 | 0.498 |
| 591 | pm25-pm28 | 1.233 | 1.044 | 1.119 | 1.339 | -0.071 | 0.013 |
| 592 | pm25-pm29 | 0.996 | 1.179 | 1.026 | 1.032 | -0.018 | 0.329 |
| 593 | pm25-pm30 | 0.95  | 0.862 | 0.936 | 0.924 | 0.006  | 0.555 |
| 594 | pm25-pm31 | 1.012 | 1.051 | 1.043 | 1.012 | 0.007  | 0.551 |

|     |           |       |       |       |       |        |       |
|-----|-----------|-------|-------|-------|-------|--------|-------|
| 595 | pm25-pm32 | 0.992 | 1.127 | 1.022 | 1.051 | 0.011  | 0.333 |
| 596 | pm25-pm33 | 0.989 | 0.995 | 1.012 | 1.002 | 0      | 0.975 |
| 597 | pm25-pm34 | 1.02  | 1.017 | 1.021 | 1.005 | 0.013  | 0.324 |
| 598 | pm25-pm35 | 1.011 | 0.994 | 1.015 | 0.97  | -0.007 | 0.448 |
| 599 | pm25-pm36 | 0.982 | 0.98  | 0.98  | 1.011 | -0.01  | 0.317 |
| 600 | pm25-pm37 | 0.998 | 1     | 0.983 | 0.998 | -0.006 | 0.584 |
| 601 | pm26-pm27 | 1.014 | 1.035 | 1.045 | 1.004 | 0.004  | 0.783 |
| 602 | pm26-pm28 | 1.242 | 1.071 | 1.11  | 1.383 | -0.054 | 0.029 |
| 603 | pm26-pm29 | 1.006 | 1.179 | 0.979 | 1.067 | -0.018 | 0.361 |
| 604 | pm26-pm30 | 0.928 | 0.914 | 0.945 | 0.9   | 0.009  | 0.567 |
| 605 | pm26-pm31 | 1.029 | 1.029 | 1.046 | 1.024 | 0.009  | 0.514 |
| 606 | pm26-pm32 | 0.989 | 1.094 | 1.024 | 1.054 | 0.003  | 0.952 |
| 607 | pm26-pm33 | 0.992 | 1.004 | 1.003 | 1.02  | 0.005  | 0.528 |
| 608 | pm26-pm34 | 1.006 | 1.028 | 0.996 | 1.02  | 0.009  | 0.415 |
| 609 | pm26-pm35 | 0.997 | 1.04  | 1.002 | 0.995 | 0.004  | 0.9   |
| 610 | pm26-pm36 | 1.002 | 1.013 | 1.007 | 1.006 | 0.009  | 0.556 |
| 611 | pm26-pm37 | 0.98  | 1.016 | 0.992 | 1.016 | 0      | 0.817 |
| 612 | pm27-pm28 | 1.231 | 1.151 | 1.148 | 1.377 | -0.05  | 0.178 |
| 613 | pm27-pm29 | 1.026 | 1.23  | 1.029 | 1.054 | -0.013 | 0.335 |
| 614 | pm27-pm30 | 0.956 | 0.928 | 0.984 | 0.907 | 0.01   | 0.595 |
| 615 | pm27-pm31 | 1.022 | 1.119 | 1.057 | 1.028 | 0.012  | 0.305 |
| 616 | pm27-pm32 | 0.994 | 1.166 | 1.019 | 1.036 | -0.005 | 0.555 |
| 617 | pm27-pm33 | 1.016 | 1.033 | 0.995 | 1.022 | -0.005 | 0.821 |
| 618 | pm27-pm34 | 1.036 | 1.052 | 1.052 | 1.004 | 0.011  | 0.375 |
| 619 | pm27-pm35 | 1.011 | 1.085 | 1.043 | 0.998 | 0.008  | 0.444 |
| 620 | pm27-pm36 | 1.003 | 1.069 | 1.014 | 0.998 | 0.001  | 0.944 |
| 621 | pm27-pm37 | 1.001 | 1.066 | 1.026 | 1.036 | 0.009  | 0.467 |
| 622 | pm28-pm29 | 1.332 | 1.228 | 1.122 | 1.48  | -0.041 | 0.161 |
| 623 | pm28-pm30 | 1.156 | 0.989 | 1.082 | 1.238 | -0.052 | 0.032 |
| 624 | pm28-pm31 | 1.264 | 1.086 | 1.162 | 1.39  | -0.053 | 0.043 |

|     |           |       |       |       |       |        |       |
|-----|-----------|-------|-------|-------|-------|--------|-------|
| 625 | pm28-pm32 | 1.227 | 1.173 | 1.13  | 1.396 | -0.061 | 0.039 |
| 626 | pm28-pm33 | 1.204 | 1.016 | 1.136 | 1.347 | -0.079 | 0.014 |
| 627 | pm28-pm34 | 1.245 | 1.1   | 1.121 | 1.361 | -0.052 | 0.038 |
| 628 | pm28-pm35 | 1.263 | 1.107 | 1.153 | 1.328 | -0.047 | 0.19  |
| 629 | pm28-pm36 | 1.224 | 1.068 | 1.155 | 1.309 | -0.065 | 0.035 |
| 630 | pm28-pm37 | 1.209 | 1.061 | 1.14  | 1.343 | -0.069 | 0.037 |
| 631 | pm29-pm30 | 1.001 | 1.296 | 0.781 | 0.927 | 0.012  | 0.375 |
| 632 | pm29-pm31 | 1.04  | 1.257 | 1.003 | 1.072 | -0.007 | 0.405 |
| 633 | pm29-pm32 | 1.054 | 1.343 | 0.983 | 1.08  | 0.001  | 0.671 |
| 634 | pm29-pm33 | 0.967 | 1.15  | 0.99  | 1.027 | -0.043 | 0.193 |
| 635 | pm29-pm34 | 1.022 | 1.123 | 0.985 | 1.047 | -0.036 | 0.26  |
| 636 | pm29-pm35 | 1.012 | 1.093 | 0.971 | 1.079 | -0.043 | 0.189 |
| 637 | pm29-pm36 | 1.017 | 1.181 | 1     | 1.07  | -0.008 | 0.591 |
| 638 | pm29-pm37 | 1.011 | 1.193 | 1.008 | 1.039 | -0.016 | 0.309 |
| 639 | pm30-pm31 | 0.925 | 0.974 | 0.984 | 0.901 | 0.01   | 0.343 |
| 640 | pm30-pm32 | 0.92  | 0.992 | 0.99  | 0.929 | 0.008  | 0.432 |
| 641 | pm30-pm33 | 0.954 | 0.913 | 0.969 | 0.909 | 0.023  | 0.258 |
| 642 | pm30-pm34 | 0.887 | 0.924 | 0.971 | 0.892 | 0.002  | 0.786 |
| 643 | pm30-pm35 | 0.946 | 0.905 | 0.961 | 0.909 | 0.012  | 0.36  |
| 644 | pm30-pm36 | 0.956 | 0.875 | 0.95  | 0.935 | 0.017  | 0.392 |
| 645 | pm30-pm37 | 0.967 | 0.876 | 0.951 | 0.921 | 0.014  | 0.379 |
| 646 | pm31-pm32 | 1.01  | 1.143 | 1.034 | 1.046 | -0.002 | 0.816 |
| 647 | pm31-pm33 | 1.01  | 0.999 | 1.04  | 1.018 | -0.006 | 0.471 |
| 648 | pm31-pm34 | 1.032 | 1.069 | 1.026 | 1.007 | 0.006  | 0.592 |
| 649 | pm31-pm35 | 1.007 | 1.07  | 1.026 | 1.012 | 0      | 0.796 |
| 650 | pm31-pm36 | 0.996 | 1.036 | 1.028 | 1.029 | 0      | 0.657 |
| 651 | pm31-pm37 | 1.006 | 1.062 | 1.046 | 0.992 | 0.002  | 0.832 |
| 652 | pm32-pm33 | 0.992 | 1.155 | 1.006 | 1.025 | 0.007  | 0.413 |
| 653 | pm32-pm34 | 1.028 | 1.188 | 1.021 | 1.03  | 0.025  | 0.237 |
| 654 | pm32-pm35 | 1.026 | 1.113 | 0.992 | 1.04  | 0      | 0.666 |

|     |           |       |       |       |       |        |       |
|-----|-----------|-------|-------|-------|-------|--------|-------|
| 655 | pm32-pm36 | 0.991 | 1.129 | 0.985 | 1.043 | 0.001  | 0.79  |
| 656 | pm32-pm37 | 1.019 | 1.167 | 1.017 | 1.002 | 0.012  | 0.396 |
| 657 | pm33-pm34 | 0.986 | 1.173 | 0.989 | 0.99  | 0.031  | 0.28  |
| 658 | pm33-pm35 | 0.998 | 1.043 | 1.004 | 0.976 | 0.001  | 0.681 |
| 659 | pm33-pm36 | 0.981 | 0.999 | 0.998 | 0.991 | -0.006 | 0.527 |
| 660 | pm33-pm37 | 1.012 | 0.979 | 0.997 | 0.999 | -0.005 | 0.959 |
| 661 | pm34-pm35 | 1.02  | 0.991 | 1.036 | 0.993 | 0.002  | 0.673 |
| 662 | pm34-pm36 | 1.029 | 0.994 | 1.016 | 0.978 | 0.002  | 0.787 |
| 663 | pm34-pm37 | 1.006 | 1.045 | 1.032 | 1.027 | 0.022  | 0.221 |
| 664 | pm35-pm36 | 1.017 | 1.034 | 0.986 | 0.989 | 0.003  | 0.864 |
| 665 | pm35-pm37 | 0.991 | 0.997 | 1.002 | 1.013 | -0.006 | 0.592 |
| 666 | pm36-pm37 | 1.019 | 0.993 | 0.981 | 0.988 | -0.005 | 0.575 |

3b) Result of two-distribution perturbation analysis for apoptosis when each response function was separately applied (10 million parameter sets)

| No. | Pair of perturbed parameter distributions | Lin   | Hill  | Sat   | Acc   | Synergistic effect | p-value |
|-----|-------------------------------------------|-------|-------|-------|-------|--------------------|---------|
| 1   | pm1-pm2                                   | 1.048 | 1.052 | 1.026 | 1.047 | 0.03               | 0.272   |
| 2   | pm1-pm3                                   | 1.034 | 1.082 | 1.05  | 1.04  | 0.03               | 0.294   |
| 3   | pm1-pm4                                   | 1.034 | 1.062 | 1.008 | 1.023 | -0.01              | 0.356   |
| 4   | pm1-pm5                                   | 1.011 | 0.992 | 1.013 | 0.997 | -0.01              | 0.362   |
| 5   | pm1-pm6                                   | 1.062 | 1.043 | 1.14  | 1.057 | 0.023              | 0.248   |
| 6   | pm1-pm7                                   | 1.949 | 1.617 | 2.101 | 1.595 | -0.104             | 0.008   |
| 7   | pm1-pm8                                   | 1.033 | 1.045 | 1.024 | 1.019 | 0.017              | 0.369   |
| 8   | pm1-pm9                                   | 1.073 | 1.108 | 1.057 | 1.059 | 0.024              | 0.287   |
| 9   | pm1-pm10                                  | 2.249 | 1.902 | 2.079 | 2.235 | 0.082              | 0.012   |
| 10  | pm1-pm11                                  | 1.022 | 1.053 | 0.993 | 1.039 | 0.006              | 0.596   |



|    |          |       |       |       |       |        |       |
|----|----------|-------|-------|-------|-------|--------|-------|
| 11 | pm1-pm12 | 1.125 | 1.235 | 1.063 | 1.244 | -0.032 | 0.247 |
| 12 | pm1-pm13 | 0.982 | 1.051 | 0.996 | 0.983 | -0.021 | 0.21  |
| 13 | pm1-pm14 | 1.008 | 1.085 | 0.994 | 1.022 | 0.009  | 0.493 |
| 14 | pm1-pm15 | 1.033 | 1.066 | 1.044 | 1.015 | 0.018  | 0.314 |
| 15 | pm1-pm16 | 0.994 | 1.08  | 1.028 | 1.033 | 0.018  | 0.354 |
| 16 | pm1-pm17 | 0.988 | 1.025 | 1.013 | 0.995 | -0.011 | 0.31  |
| 17 | pm1-pm18 | 1.031 | 1     | 1.028 | 1.023 | 0.006  | 0.49  |
| 18 | pm1-pm19 | 1.012 | 1.004 | 1.032 | 1.02  | 0.002  | 0.972 |
| 19 | pm1-pm20 | 1.027 | 1.027 | 1.016 | 1.029 | 0.007  | 0.59  |
| 20 | pm1-pm21 | 1.172 | 1.305 | 1.4   | 1.037 | -0.048 | 0.161 |
| 21 | pm1-pm22 | 1.089 | 1.201 | 1.109 | 1.064 | 0.021  | 0.212 |
| 22 | pm1-pm23 | 1.135 | 1.241 | 1.145 | 1.067 | 0.009  | 0.58  |
| 23 | pm1-pm24 | 1.019 | 1.082 | 1.001 | 1.018 | 0.011  | 0.373 |
| 24 | pm1-pm25 | 1.028 | 1.036 | 1.02  | 1.019 | 0.011  | 0.353 |
| 25 | pm1-pm26 | 0.999 | 1.045 | 0.981 | 1.002 | -0.009 | 0.576 |
| 26 | pm1-pm27 | 1.01  | 1.077 | 1.018 | 1.013 | -0.007 | 0.527 |
| 27 | pm1-pm28 | 1.248 | 1.11  | 1.132 | 1.372 | -0.056 | 0.035 |
| 28 | pm1-pm29 | 1.026 | 1.209 | 1.007 | 1.092 | -0.009 | 0.447 |
| 29 | pm1-pm30 | 0.946 | 0.954 | 0.974 | 0.912 | 0.018  | 0.391 |
| 30 | pm1-pm31 | 1.035 | 1.064 | 1.034 | 1.033 | 0.003  | 0.799 |
| 31 | pm1-pm32 | 1.021 | 1.186 | 1.051 | 1.04  | 0.022  | 0.287 |
| 32 | pm1-pm33 | 1.002 | 1.065 | 1.019 | 1.009 | 0.008  | 0.505 |
| 33 | pm1-pm34 | 1.039 | 1.102 | 1.009 | 0.995 | 0.017  | 0.309 |
| 34 | pm1-pm35 | 1.024 | 1.097 | 1.002 | 1.035 | 0.019  | 0.361 |
| 35 | pm1-pm36 | 1.003 | 1.055 | 1.029 | 1.053 | 0.02   | 0.23  |
| 36 | pm1-pm37 | 1.006 | 1.049 | 0.994 | 1.02  | 0      | 0.817 |
| 37 | pm2-pm3  | 1.015 | 1.022 | 1.02  | 0.999 | 0.01   | 0.318 |
| 38 | pm2-pm4  | 1.007 | 1.054 | 1.04  | 0.984 | -0.003 | 0.998 |
| 39 | pm2-pm5  | 0.98  | 0.989 | 0.959 | 1.028 | -0.007 | 0.401 |
| 40 | pm2-pm6  | 1.013 | 0.982 | 1.093 | 1.015 | -0.009 | 0.463 |

|    |          |       |       |       |       |        |       |
|----|----------|-------|-------|-------|-------|--------|-------|
| 41 | pm2-pm7  | 1.973 | 1.555 | 2.079 | 1.615 | -0.096 | 0.012 |
| 42 | pm2-pm8  | 0.996 | 1.022 | 0.987 | 0.985 | 0.002  | 0.941 |
| 43 | pm2-pm9  | 1.015 | 1.044 | 1.024 | 1.001 | -0.011 | 0.374 |
| 44 | pm2-pm10 | 2.259 | 1.895 | 2.144 | 2.299 | 0.132  | 0.009 |
| 45 | pm2-pm11 | 0.982 | 0.991 | 0.992 | 0.998 | -0.012 | 0.31  |
| 46 | pm2-pm12 | 1.109 | 1.154 | 1.027 | 1.172 | -0.066 | 0.024 |
| 47 | pm2-pm13 | 0.974 | 1.054 | 1.011 | 1.004 | 0.005  | 0.732 |
| 48 | pm2-pm14 | 0.968 | 1.031 | 1.004 | 0.989 | -0.003 | 0.979 |
| 49 | pm2-pm15 | 1.004 | 1.042 | 0.991 | 1.002 | 0.006  | 0.44  |
| 50 | pm2-pm16 | 1.029 | 1.025 | 0.993 | 1.027 | 0.021  | 0.252 |
| 51 | pm2-pm17 | 0.988 | 1.03  | 1.018 | 0.98  | 0.005  | 0.582 |
| 52 | pm2-pm18 | 0.998 | 1.017 | 0.979 | 0.998 | 0.001  | 0.908 |
| 53 | pm2-pm19 | 0.994 | 1.004 | 1.016 | 0.988 | 0.004  | 0.908 |
| 54 | pm2-pm20 | 1.011 | 1.043 | 1.01  | 0.98  | 0.011  | 0.33  |
| 55 | pm2-pm21 | 1.123 | 1.275 | 1.383 | 1.015 | -0.059 | 0.022 |
| 56 | pm2-pm22 | 1.055 | 1.134 | 1.076 | 1.009 | -0.008 | 0.449 |
| 57 | pm2-pm23 | 1.064 | 1.231 | 1.119 | 1.068 | 0.001  | 0.909 |
| 58 | pm2-pm24 | 1     | 1.04  | 0.997 | 0.998 | 0.007  | 0.457 |
| 59 | pm2-pm25 | 0.973 | 0.964 | 0.996 | 1.003 | -0.013 | 0.327 |
| 60 | pm2-pm26 | 1.009 | 0.999 | 1     | 0.984 | 0.001  | 0.656 |
| 61 | pm2-pm27 | 1.018 | 1.036 | 1.044 | 1.027 | 0.012  | 0.372 |
| 62 | pm2-pm28 | 1.224 | 1.061 | 1.121 | 1.329 | -0.069 | 0.024 |
| 63 | pm2-pm29 | 1.016 | 1.215 | 1.002 | 1.072 | 0.002  | 0.811 |
| 64 | pm2-pm30 | 0.937 | 0.921 | 0.973 | 0.876 | 0.016  | 0.352 |
| 65 | pm2-pm31 | 0.978 | 1.018 | 1.018 | 0.992 | -0.02  | 0.321 |
| 66 | pm2-pm32 | 1.003 | 1.133 | 1.014 | 1.011 | 0.005  | 0.867 |
| 67 | pm2-pm33 | 0.983 | 1.015 | 1.009 | 1.015 | 0.008  | 0.479 |
| 68 | pm2-pm34 | 0.961 | 1.034 | 1.013 | 1.016 | 0.004  | 0.882 |
| 69 | pm2-pm35 | 1.029 | 1.027 | 1.003 | 1.016 | 0.016  | 0.398 |
| 70 | pm2-pm36 | 1.009 | 0.992 | 1.013 | 1.001 | 0.007  | 0.581 |

|     |          |       |       |       |       |        |       |
|-----|----------|-------|-------|-------|-------|--------|-------|
| 71  | pm2-pm37 | 1.018 | 1.018 | 1.014 | 1.025 | 0.019  | 0.367 |
| 72  | pm3-pm4  | 1.01  | 1.043 | 1     | 1.001 | -0.018 | 0.39  |
| 73  | pm3-pm5  | 0.994 | 1.008 | 1.045 | 1.026 | 0.014  | 0.378 |
| 74  | pm3-pm6  | 1.031 | 1.02  | 1.073 | 1.029 | -0.004 | 0.688 |
| 75  | pm3-pm7  | 1.944 | 1.571 | 2.092 | 1.598 | -0.109 | 0.009 |
| 76  | pm3-pm8  | 1.005 | 1.032 | 1.024 | 0.997 | 0.012  | 0.358 |
| 77  | pm3-pm9  | 1.033 | 1.016 | 1.063 | 0.999 | -0.012 | 0.342 |
| 78  | pm3-pm10 | 2.316 | 1.944 | 2.472 | 2.048 | 0.17   | 0.002 |
| 79  | pm3-pm11 | 1.015 | 1.025 | 1.029 | 0.991 | 0.005  | 0.951 |
| 80  | pm3-pm12 | 1.08  | 1.211 | 1.039 | 1.201 | -0.056 | 0.034 |
| 81  | pm3-pm13 | 1     | 1.058 | 1.002 | 0.99  | -0.001 | 0.894 |
| 82  | pm3-pm14 | 1.002 | 1.047 | 1.002 | 1.007 | 0.006  | 0.444 |
| 83  | pm3-pm15 | 0.995 | 1.019 | 0.983 | 0.994 | -0.013 | 0.321 |
| 84  | pm3-pm16 | 0.988 | 1.022 | 1.012 | 0.993 | -0.002 | 0.843 |
| 85  | pm3-pm17 | 0.99  | 0.988 | 1.033 | 0.983 | -0.008 | 0.447 |
| 86  | pm3-pm18 | 1.017 | 1.018 | 0.99  | 1.016 | 0.006  | 0.407 |
| 87  | pm3-pm19 | 0.999 | 1.017 | 1.004 | 0.988 | -0.003 | 0.989 |
| 88  | pm3-pm20 | 0.997 | 1.057 | 0.992 | 0.993 | 0.002  | 0.878 |
| 89  | pm3-pm21 | 1.113 | 1.283 | 1.335 | 1.01  | -0.081 | 0.017 |
| 90  | pm3-pm22 | 1.085 | 1.19  | 1.062 | 1.03  | 0.007  | 0.409 |
| 91  | pm3-pm23 | 1.074 | 1.215 | 1.122 | 1.038 | -0.015 | 0.373 |
| 92  | pm3-pm24 | 1.016 | 1.044 | 1     | 1.011 | 0.009  | 0.476 |
| 93  | pm3-pm25 | 0.989 | 1.029 | 1.002 | 1.002 | 0      | 0.865 |
| 94  | pm3-pm26 | 1.008 | 1.042 | 1.031 | 1.017 | 0.019  | 0.325 |
| 95  | pm3-pm27 | 1.005 | 1.047 | 1.041 | 0.996 | -0.005 | 0.716 |
| 96  | pm3-pm28 | 1.201 | 1.054 | 1.132 | 1.346 | -0.078 | 0.019 |
| 97  | pm3-pm29 | 0.975 | 1.198 | 1.026 | 1.018 | -0.028 | 0.228 |
| 98  | pm3-pm30 | 0.899 | 0.882 | 0.963 | 0.893 | -0.009 | 0.507 |
| 99  | pm3-pm31 | 1.014 | 1.05  | 1.019 | 1.002 | -0.008 | 0.434 |
| 100 | pm3-pm32 | 0.997 | 1.136 | 1.032 | 1.035 | 0.006  | 0.484 |

|     |          |       |       |       |       |        |       |
|-----|----------|-------|-------|-------|-------|--------|-------|
| 101 | pm3-pm33 | 0.984 | 1.001 | 0.995 | 0.995 | -0.011 | 0.355 |
| 102 | pm3-pm34 | 1.02  | 1.074 | 0.995 | 0.976 | 0.007  | 0.421 |
| 103 | pm3-pm35 | 0.998 | 1.005 | 1.012 | 0.966 | -0.015 | 0.355 |
| 104 | pm3-pm36 | 0.989 | 0.965 | 1.006 | 0.997 | -0.015 | 0.36  |
| 105 | pm3-pm37 | 0.999 | 0.993 | 1.011 | 1.004 | -0.006 | 0.548 |
| 106 | pm4-pm5  | 1.002 | 1.045 | 0.977 | 1.024 | -0.012 | 0.374 |
| 107 | pm4-pm6  | 1.018 | 1.006 | 1.073 | 1.001 | -0.038 | 0.294 |
| 108 | pm4-pm7  | 1.915 | 1.605 | 2.076 | 1.619 | -0.126 | 0.007 |
| 109 | pm4-pm8  | 0.996 | 1.069 | 1.017 | 1.015 | 0.001  | 0.891 |
| 110 | pm4-pm9  | 1.017 | 1.087 | 1.03  | 1.045 | -0.015 | 0.319 |
| 111 | pm4-pm10 | 2.1   | 1.875 | 1.999 | 2.151 | -0.014 | 0.322 |
| 112 | pm4-pm11 | 0.99  | 1.052 | 1.035 | 1.001 | -0.012 | 0.357 |
| 113 | pm4-pm12 | 1.095 | 1.23  | 1.066 | 1.219 | -0.057 | 0.039 |
| 114 | pm4-pm13 | 0.974 | 1.039 | 1.029 | 0.992 | -0.025 | 0.217 |
| 115 | pm4-pm14 | 1.032 | 1.079 | 1.043 | 0.991 | 0.008  | 0.514 |
| 116 | pm4-pm15 | 1.002 | 1.081 | 1.06  | 1.013 | 0.008  | 0.505 |
| 117 | pm4-pm16 | 1.037 | 1.084 | 1.033 | 0.999 | 0.012  | 0.319 |
| 118 | pm4-pm17 | 0.99  | 1.079 | 1.009 | 0.971 | -0.015 | 0.321 |
| 119 | pm4-pm18 | 1.018 | 1.015 | 0.988 | 0.981 | -0.024 | 0.265 |
| 120 | pm4-pm19 | 1.02  | 1.002 | 1.016 | 0.987 | -0.019 | 0.338 |
| 121 | pm4-pm20 | 1.009 | 1.086 | 1.028 | 0.992 | 0.001  | 0.62  |
| 122 | pm4-pm21 | 1.139 | 1.312 | 1.419 | 1.012 | -0.066 | 0.025 |
| 123 | pm4-pm22 | 1.057 | 1.237 | 1.13  | 1.034 | 0.01   | 0.304 |
| 124 | pm4-pm23 | 1.141 | 1.41  | 1.141 | 1.032 | 0.033  | 0.294 |
| 125 | pm4-pm24 | 0.986 | 1.051 | 1.03  | 0.973 | -0.019 | 0.379 |
| 126 | pm4-pm25 | 1.01  | 1.048 | 0.992 | 0.999 | -0.013 | 0.348 |
| 127 | pm4-pm26 | 1.022 | 1.075 | 1.006 | 0.969 | -0.007 | 0.568 |
| 128 | pm4-pm27 | 1.05  | 1.04  | 1.041 | 1.014 | -0.011 | 0.331 |
| 129 | pm4-pm28 | 1.252 | 1.167 | 1.14  | 1.313 | -0.063 | 0.04  |
| 130 | pm4-pm29 | 1.017 | 1.33  | 1     | 1.116 | 0.013  | 0.33  |

|     |          |       |       |       |       |        |       |
|-----|----------|-------|-------|-------|-------|--------|-------|
| 131 | pm4-pm30 | 0.953 | 0.962 | 0.978 | 0.893 | 0.008  | 0.471 |
| 132 | pm4-pm31 | 0.987 | 1.064 | 1.054 | 1.026 | -0.017 | 0.351 |
| 133 | pm4-pm32 | 1.006 | 1.131 | 1.013 | 1.036 | -0.017 | 0.324 |
| 134 | pm4-pm33 | 1.006 | 1.053 | 1.03  | 1.006 | -0.002 | 0.716 |
| 135 | pm4-pm34 | 1.006 | 1.106 | 1.04  | 0.977 | 0.002  | 0.872 |
| 136 | pm4-pm35 | 0.996 | 1.044 | 0.973 | 0.97  | -0.035 | 0.294 |
| 137 | pm4-pm36 | 1.008 | 1.051 | 1.029 | 1.021 | 0.003  | 0.959 |
| 138 | pm4-pm37 | 0.998 | 1.04  | 1.01  | 0.986 | -0.019 | 0.36  |
| 139 | pm5-pm6  | 1.059 | 1.001 | 1.098 | 1.007 | 0.007  | 0.459 |
| 140 | pm5-pm7  | 1.946 | 1.573 | 2.09  | 1.57  | -0.107 | 0.008 |
| 141 | pm5-pm8  | 1.003 | 0.976 | 0.978 | 1     | -0.006 | 0.42  |
| 142 | pm5-pm9  | 0.991 | 1.032 | 1.014 | 1.046 | -0.012 | 0.389 |
| 143 | pm5-pm10 | 2.147 | 1.704 | 1.967 | 2.185 | -0.016 | 0.359 |
| 144 | pm5-pm11 | 1.013 | 0.99  | 0.975 | 1.017 | -0.004 | 0.964 |
| 145 | pm5-pm12 | 1.125 | 1.188 | 1.018 | 1.245 | -0.038 | 0.277 |
| 146 | pm5-pm13 | 0.976 | 1.008 | 0.996 | 0.965 | -0.02  | 0.333 |
| 147 | pm5-pm14 | 1.014 | 1.039 | 1.043 | 0.987 | 0.02   | 0.215 |
| 148 | pm5-pm15 | 1.007 | 1.015 | 1.001 | 1     | 0.002  | 0.678 |
| 149 | pm5-pm16 | 0.997 | 0.978 | 1.002 | 0.987 | -0.007 | 0.455 |
| 150 | pm5-pm17 | 1.039 | 0.993 | 0.977 | 0.989 | 0      | 0.677 |
| 151 | pm5-pm18 | 1.005 | 0.974 | 0.977 | 0.981 | -0.013 | 0.358 |
| 152 | pm5-pm19 | 0.998 | 0.983 | 0.991 | 1.015 | -0.001 | 0.847 |
| 153 | pm5-pm20 | 1.002 | 0.987 | 0.986 | 1.007 | -0.005 | 0.779 |
| 154 | pm5-pm21 | 1.122 | 1.291 | 1.366 | 1.015 | -0.06  | 0.022 |
| 155 | pm5-pm22 | 1.07  | 1.103 | 1.095 | 1.017 | -0.006 | 0.515 |
| 156 | pm5-pm23 | 1.087 | 1.207 | 1.121 | 1.072 | 0.002  | 0.717 |
| 157 | pm5-pm24 | 0.997 | 0.993 | 0.976 | 1.023 | -0.004 | 0.844 |
| 158 | pm5-pm25 | 0.983 | 0.979 | 0.975 | 0.991 | -0.016 | 0.349 |
| 159 | pm5-pm26 | 0.998 | 0.972 | 0.989 | 0.981 | -0.013 | 0.314 |
| 160 | pm5-pm27 | 1.001 | 0.988 | 1.042 | 0.998 | -0.012 | 0.331 |

|     |          |       |       |       |       |        |       |
|-----|----------|-------|-------|-------|-------|--------|-------|
| 161 | pm5-pm28 | 1.204 | 1.025 | 1.12  | 1.373 | -0.073 | 0.015 |
| 162 | pm5-pm29 | 0.982 | 1.174 | 0.958 | 1.098 | -0.022 | 0.222 |
| 163 | pm5-pm30 | 0.916 | 0.864 | 0.998 | 0.899 | 0.008  | 0.496 |
| 164 | pm5-pm31 | 1.008 | 1.033 | 1.024 | 1.019 | 0      | 0.733 |
| 165 | pm5-pm32 | 1.008 | 1.143 | 0.987 | 1.03  | 0.007  | 0.491 |
| 166 | pm5-pm33 | 0.991 | 0.978 | 0.988 | 0.995 | -0.01  | 0.439 |
| 167 | pm5-pm34 | 1.013 | 1.03  | 1.007 | 0.968 | 0.003  | 0.78  |
| 168 | pm5-pm35 | 0.986 | 1.027 | 0.98  | 1.009 | -0.002 | 0.898 |
| 169 | pm5-pm36 | 1.002 | 0.997 | 0.989 | 0.996 | -0.001 | 0.913 |
| 170 | pm5-pm37 | 0.984 | 0.996 | 1.012 | 1.03  | 0.006  | 0.476 |
| 171 | pm6-pm7  | 1.985 | 1.567 | 2.266 | 1.627 | -0.079 | 0.011 |
| 172 | pm6-pm8  | 1.018 | 1.038 | 1.107 | 1.004 | 0.008  | 0.54  |
| 173 | pm6-pm9  | 1.058 | 1.028 | 1.143 | 1.044 | -0.002 | 0.836 |
| 174 | pm6-pm10 | 2.281 | 1.967 | 2.291 | 2.352 | 0.167  | 0.002 |
| 175 | pm6-pm11 | 1.036 | 1     | 1.095 | 1.012 | -0.006 | 0.589 |
| 176 | pm6-pm12 | 1.137 | 1.203 | 1.145 | 1.243 | -0.038 | 0.217 |
| 177 | pm6-pm13 | 1.017 | 1.026 | 1.076 | 1.021 | -0.009 | 0.513 |
| 178 | pm6-pm14 | 1.033 | 1.066 | 1.11  | 1.013 | 0.017  | 0.308 |
| 179 | pm6-pm15 | 1.017 | 0.998 | 1.096 | 1.024 | -0.008 | 0.428 |
| 180 | pm6-pm16 | 1.033 | 1.011 | 1.116 | 1.009 | 0.006  | 0.521 |
| 181 | pm6-pm17 | 1.021 | 1.01  | 1.093 | 1.006 | -0.005 | 0.604 |
| 182 | pm6-pm18 | 1.05  | 0.996 | 1.105 | 1.014 | 0.006  | 0.452 |
| 183 | pm6-pm19 | 1.017 | 1.042 | 1.107 | 1.013 | 0.009  | 0.481 |
| 184 | pm6-pm20 | 1.054 | 1.012 | 1.109 | 1.018 | 0.01   | 0.498 |
| 185 | pm6-pm21 | 1.146 | 1.328 | 1.525 | 1.054 | -0.033 | 0.298 |
| 186 | pm6-pm22 | 1.092 | 1.129 | 1.169 | 1.016 | -0.014 | 0.362 |
| 187 | pm6-pm23 | 1.085 | 1.223 | 1.218 | 1.042 | -0.016 | 0.342 |
| 188 | pm6-pm24 | 1.032 | 1.025 | 1.075 | 1.014 | -0.003 | 0.85  |
| 189 | pm6-pm25 | 1.03  | 1.013 | 1.106 | 1.013 | 0.005  | 0.653 |
| 190 | pm6-pm26 | 1.038 | 0.997 | 1.082 | 1.005 | -0.005 | 0.518 |

|     |          |       |       |       |       |        |        |
|-----|----------|-------|-------|-------|-------|--------|--------|
| 191 | pm6-pm27 | 1.061 | 1.054 | 1.142 | 1.028 | 0.014  | 0.327  |
| 192 | pm6-pm28 | 1.297 | 1.117 | 1.205 | 1.304 | -0.061 | 0.026  |
| 193 | pm6-pm29 | 1.023 | 1.152 | 1.111 | 1.114 | -0.013 | 0.372  |
| 194 | pm6-pm30 | 0.93  | 0.931 | 1.058 | 0.895 | 0.004  | 0.737  |
| 195 | pm6-pm31 | 1.056 | 1.049 | 1.106 | 1.041 | 0.003  | 0.948  |
| 196 | pm6-pm32 | 1.033 | 1.148 | 1.098 | 1.078 | 0.015  | 0.316  |
| 197 | pm6-pm33 | 1.022 | 1.032 | 1.128 | 1.024 | 0.015  | 0.356  |
| 198 | pm6-pm34 | 1.041 | 1.044 | 1.13  | 0.996 | 0.013  | 0.38   |
| 199 | pm6-pm35 | 1.03  | 1.017 | 1.08  | 1.028 | -0.003 | 0.843  |
| 200 | pm6-pm36 | 1.038 | 1.015 | 1.106 | 1.03  | 0.012  | 0.362  |
| 201 | pm6-pm37 | 1.033 | 1.015 | 1.127 | 1.015 | 0.009  | 0.494  |
| 202 | pm7-pm8  | 1.986 | 1.642 | 2.085 | 1.613 | -0.07  | 0.016  |
| 203 | pm7-pm9  | 2.015 | 1.578 | 2.133 | 1.663 | -0.091 | 0.011  |
| 204 | pm7-pm10 | 3.979 | 2.552 | 3.882 | 3.334 | 0.514  | <0.001 |
| 205 | pm7-pm11 | 1.941 | 1.636 | 2.086 | 1.652 | -0.08  | 0.014  |
| 206 | pm7-pm12 | 2.152 | 1.786 | 2.18  | 1.949 | -0.071 | 0.018  |
| 207 | pm7-pm13 | 1.953 | 1.579 | 2.079 | 1.585 | -0.113 | 0.008  |
| 208 | pm7-pm14 | 2.005 | 1.552 | 2.096 | 1.585 | -0.097 | 0.018  |
| 209 | pm7-pm15 | 1.968 | 1.608 | 2.049 | 1.584 | -0.107 | 0.007  |
| 210 | pm7-pm16 | 1.995 | 1.583 | 2.083 | 1.615 | -0.085 | 0.01   |
| 211 | pm7-pm17 | 1.986 | 1.521 | 2.114 | 1.606 | -0.098 | 0.011  |
| 212 | pm7-pm18 | 1.957 | 1.518 | 2.043 | 1.552 | -0.136 | 0.008  |
| 213 | pm7-pm19 | 1.945 | 1.54  | 2.13  | 1.596 | -0.101 | 0.009  |
| 214 | pm7-pm20 | 1.965 | 1.588 | 2.075 | 1.609 | -0.097 | 0.01   |
| 215 | pm7-pm21 | 2.177 | 1.948 | 2.795 | 1.619 | -0.03  | 0.266  |
| 216 | pm7-pm22 | 2.083 | 1.731 | 2.255 | 1.661 | -0.05  | 0.041  |
| 217 | pm7-pm23 | 2.049 | 1.832 | 2.231 | 1.672 | -0.08  | 0.019  |
| 218 | pm7-pm24 | 1.99  | 1.591 | 2.114 | 1.583 | -0.088 | 0.016  |
| 219 | pm7-pm25 | 1.954 | 1.522 | 2.102 | 1.62  | -0.104 | 0.008  |
| 220 | pm7-pm26 | 1.975 | 1.617 | 2.087 | 1.575 | -0.09  | 0.016  |

|     |          |       |       |       |       |        |       |
|-----|----------|-------|-------|-------|-------|--------|-------|
| 221 | pm7-pm27 | 1.98  | 1.546 | 2.129 | 1.612 | -0.109 | 0.008 |
| 222 | pm7-pm28 | 2.433 | 1.614 | 2.329 | 2.178 | -0.021 | 0.201 |
| 223 | pm7-pm29 | 2.08  | 1.849 | 2.054 | 1.683 | -0.065 | 0.022 |
| 224 | pm7-pm30 | 2.108 | 1.707 | 2.35  | 1.44  | 0.085  | 0.015 |
| 225 | pm7-pm31 | 2.015 | 1.677 | 2.136 | 1.605 | -0.069 | 0.041 |
| 226 | pm7-pm32 | 1.939 | 1.626 | 2.045 | 1.649 | -0.127 | 0.009 |
| 227 | pm7-pm33 | 1.964 | 1.538 | 2.065 | 1.604 | -0.111 | 0.009 |
| 228 | pm7-pm34 | 1.965 | 1.593 | 2.099 | 1.594 | -0.095 | 0.012 |
| 229 | pm7-pm35 | 1.985 | 1.519 | 2.106 | 1.575 | -0.113 | 0.007 |
| 230 | pm7-pm36 | 1.956 | 1.547 | 2.084 | 1.581 | -0.111 | 0.008 |
| 231 | pm7-pm37 | 1.983 | 1.557 | 2.073 | 1.586 | -0.106 | 0.006 |
| 232 | pm8-pm9  | 1.001 | 1.065 | 1.015 | 1.001 | -0.011 | 0.327 |
| 233 | pm8-pm10 | 2.286 | 1.979 | 2.161 | 2.033 | 0.099  | 0.01  |
| 234 | pm8-pm11 | 1.024 | 0.981 | 0.988 | 0.995 | -0.005 | 0.558 |
| 235 | pm8-pm12 | 1.104 | 1.155 | 1.05  | 1.177 | -0.059 | 0.034 |
| 236 | pm8-pm13 | 1.008 | 1.01  | 0.987 | 0.978 | -0.009 | 0.494 |
| 237 | pm8-pm14 | 0.985 | 1.055 | 1.016 | 1.015 | 0.018  | 0.319 |
| 238 | pm8-pm15 | 1.026 | 0.994 | 1.002 | 1.027 | 0.009  | 0.469 |
| 239 | pm8-pm16 | 1.002 | 1.014 | 1.024 | 0.99  | 0.01   | 0.326 |
| 240 | pm8-pm17 | 1.013 | 1.015 | 0.992 | 0.984 | 0.003  | 0.706 |
| 241 | pm8-pm18 | 0.991 | 0.991 | 0.981 | 0.983 | -0.01  | 0.514 |
| 242 | pm8-pm19 | 0.982 | 0.978 | 0.996 | 0.996 | -0.008 | 0.451 |
| 243 | pm8-pm20 | 0.991 | 1.001 | 0.988 | 0.983 | -0.009 | 0.577 |
| 244 | pm8-pm21 | 1.111 | 1.256 | 1.371 | 1.028 | -0.066 | 0.027 |
| 245 | pm8-pm22 | 1.076 | 1.14  | 1.073 | 1.024 | 0.002  | 0.688 |
| 246 | pm8-pm23 | 1.072 | 1.252 | 1.105 | 1.041 | -0.002 | 0.656 |
| 247 | pm8-pm24 | 1.004 | 0.992 | 0.989 | 0.977 | -0.01  | 0.312 |
| 248 | pm8-pm25 | 1.007 | 1.019 | 1.003 | 1.005 | 0.012  | 0.327 |
| 249 | pm8-pm26 | 1.004 | 0.99  | 0.993 | 1.012 | 0.003  | 0.677 |
| 250 | pm8-pm27 | 1.003 | 1.044 | 1.017 | 1.007 | -0.001 | 0.75  |



|     |          |       |       |       |       |        |       |
|-----|----------|-------|-------|-------|-------|--------|-------|
| 251 | pm8-pm28 | 1.229 | 1.094 | 1.081 | 1.346 | -0.065 | 0.045 |
| 252 | pm8-pm29 | 1.027 | 1.161 | 0.995 | 1.109 | -0.001 | 0.7   |
| 253 | pm8-pm30 | 0.953 | 0.881 | 0.963 | 0.905 | 0.015  | 0.321 |
| 254 | pm8-pm31 | 1.021 | 1.038 | 1.019 | 1.018 | 0.003  | 0.935 |
| 255 | pm8-pm32 | 0.985 | 1.112 | 1.022 | 1.024 | 0.001  | 0.87  |
| 256 | pm8-pm33 | 1.023 | 0.998 | 0.987 | 0.992 | 0.003  | 0.743 |
| 257 | pm8-pm34 | 0.971 | 1.015 | 1     | 0.983 | -0.009 | 0.535 |
| 258 | pm8-pm35 | 1.02  | 1.034 | 0.99  | 1.009 | 0.011  | 0.358 |
| 259 | pm8-pm36 | 0.983 | 1.017 | 0.993 | 1.003 | 0.003  | 0.732 |
| 260 | pm8-pm37 | 0.993 | 0.988 | 1.003 | 0.989 | -0.006 | 0.512 |
| 261 | pm9-pm10 | 2.3   | 2.005 | 2.199 | 2.059 | 0.088  | 0.013 |
| 262 | pm9-pm11 | 1.037 | 1.025 | 1.023 | 1.04  | -0.008 | 0.525 |
| 263 | pm9-pm12 | 1.173 | 1.182 | 1.045 | 1.269 | -0.05  | 0.039 |
| 264 | pm9-pm13 | 1.019 | 1.018 | 1.039 | 0.994 | -0.025 | 0.283 |
| 265 | pm9-pm14 | 1.023 | 1.078 | 1.032 | 1.029 | 0.004  | 0.842 |
| 266 | pm9-pm15 | 1.026 | 1.045 | 1.081 | 1.017 | 0.002  | 0.862 |
| 267 | pm9-pm16 | 1.042 | 1.04  | 1.009 | 1.044 | -0.001 | 0.933 |
| 268 | pm9-pm17 | 1.034 | 1.041 | 1.061 | 1.003 | -0.001 | 0.616 |
| 269 | pm9-pm18 | 1.009 | 1.002 | 1.009 | 0.996 | -0.029 | 0.264 |
| 270 | pm9-pm19 | 1.019 | 1.042 | 1.012 | 1.019 | -0.01  | 0.335 |
| 271 | pm9-pm20 | 1.01  | 1.037 | 1.036 | 1.035 | -0.007 | 0.466 |
| 272 | pm9-pm21 | 1.147 | 1.344 | 1.434 | 1.031 | -0.056 | 0.021 |
| 273 | pm9-pm22 | 1.105 | 1.201 | 1.127 | 1.037 | 0.005  | 0.627 |
| 274 | pm9-pm23 | 1.083 | 1.269 | 1.107 | 1.055 | -0.027 | 0.262 |
| 275 | pm9-pm24 | 1.051 | 1.048 | 1.002 | 1.006 | -0.011 | 0.33  |
| 276 | pm9-pm25 | 1.043 | 1.043 | 1.037 | 1.046 | 0.009  | 0.455 |
| 277 | pm9-pm26 | 1.018 | 1.062 | 1.004 | 1.019 | -0.008 | 0.408 |
| 278 | pm9-pm27 | 1.046 | 1.082 | 1.039 | 1.02  | -0.009 | 0.474 |
| 279 | pm9-pm28 | 1.272 | 1.123 | 1.171 | 1.383 | -0.053 | 0.04  |
| 280 | pm9-pm29 | 1.04  | 1.178 | 1.014 | 1.082 | -0.032 | 0.269 |

|     |           |       |       |       |       |        |       |
|-----|-----------|-------|-------|-------|-------|--------|-------|
| 281 | pm9-pm30  | 0.951 | 0.957 | 1.004 | 0.904 | 0.007  | 0.552 |
| 282 | pm9-pm31  | 1.046 | 1.1   | 1.07  | 1.054 | 0.01   | 0.381 |
| 283 | pm9-pm32  | 1.019 | 1.153 | 1.044 | 1.065 | -0.002 | 0.962 |
| 284 | pm9-pm33  | 1.003 | 1.072 | 1.044 | 1.025 | 0.002  | 0.892 |
| 285 | pm9-pm34  | 1.04  | 1.054 | 1     | 1.017 | -0.01  | 0.325 |
| 286 | pm9-pm35  | 1.023 | 1.089 | 1.016 | 0.996 | -0.008 | 0.431 |
| 287 | pm9-pm36  | 1.023 | 1.041 | 1.058 | 1.026 | 0.004  | 0.694 |
| 288 | pm9-pm37  | 1.036 | 1.066 | 1.018 | 1.01  | -0.003 | 0.817 |
| 289 | pm10-pm11 | 2.331 | 1.929 | 2.154 | 2.105 | 0.106  | 0.007 |
| 290 | pm10-pm12 | 2.193 | 1.975 | 1.925 | 2.436 | -0.07  | 0.016 |
| 291 | pm10-pm13 | 2.301 | 2.006 | 2.138 | 2.005 | 0.086  | 0.018 |
| 292 | pm10-pm14 | 2.242 | 1.856 | 2.062 | 2.246 | 0.08   | 0.014 |
| 293 | pm10-pm15 | 2.094 | 1.91  | 2.099 | 2.246 | 0.063  | 0.028 |
| 294 | pm10-pm16 | 1.989 | 1.758 | 1.853 | 2.022 | -0.113 | 0.006 |
| 295 | pm10-pm17 | 2.297 | 1.969 | 2.121 | 2.042 | 0.087  | 0.019 |
| 296 | pm10-pm18 | 1.988 | 1.717 | 1.888 | 2.073 | -0.101 | 0.006 |
| 297 | pm10-pm19 | 2.16  | 1.891 | 2.079 | 2.272 | 0.082  | 0.017 |
| 298 | pm10-pm20 | 2.307 | 2.005 | 2.155 | 2.052 | 0.108  | 0.008 |
| 299 | pm10-pm21 | 2.202 | 2.14  | 2.56  | 2.061 | -0.039 | 0.297 |
| 300 | pm10-pm22 | 2.041 | 1.902 | 1.964 | 2.104 | -0.095 | 0.018 |
| 301 | pm10-pm23 | 2.142 | 1.941 | 2.038 | 2.126 | -0.079 | 0.018 |
| 302 | pm10-pm24 | 2.098 | 1.831 | 1.965 | 2.108 | -0.022 | 0.237 |
| 303 | pm10-pm25 | 2.108 | 1.766 | 2.004 | 2.127 | -0.017 | 0.378 |
| 304 | pm10-pm26 | 2.306 | 1.94  | 2.177 | 2.049 | 0.099  | 0.018 |
| 305 | pm10-pm27 | 2.053 | 1.747 | 1.88  | 2.065 | -0.104 | 0.009 |
| 306 | pm10-pm28 | 2.408 | 1.732 | 2.049 | 2.745 | -0.041 | 0.19  |
| 307 | pm10-pm29 | 2.01  | 1.939 | 1.889 | 2.204 | -0.085 | 0.016 |
| 308 | pm10-pm30 | 2.119 | 1.883 | 2.074 | 2.126 | 0.119  | 0.008 |
| 309 | pm10-pm31 | 2.051 | 1.693 | 1.875 | 2.084 | -0.116 | 0.006 |
| 310 | pm10-pm32 | 2.201 | 1.953 | 2.084 | 2.325 | 0.085  | 0.011 |

|     |           |       |       |       |       |        |       |
|-----|-----------|-------|-------|-------|-------|--------|-------|
| 311 | pm10-pm33 | 2.273 | 1.943 | 2.193 | 2.021 | 0.089  | 0.015 |
| 312 | pm10-pm34 | 2.303 | 2.025 | 2.127 | 2.066 | 0.108  | 0.01  |
| 313 | pm10-pm35 | 2.279 | 1.984 | 2.128 | 2.042 | 0.084  | 0.01  |
| 314 | pm10-pm36 | 2.243 | 1.987 | 2.148 | 2.027 | 0.083  | 0.016 |
| 315 | pm10-pm37 | 2.295 | 2.001 | 2.178 | 2.007 | 0.1    | 0.02  |
| 316 | pm11-pm12 | 1.107 | 1.156 | 1.029 | 1.254 | -0.052 | 0.03  |
| 317 | pm11-pm13 | 0.999 | 1.053 | 1.04  | 0.986 | 0.007  | 0.473 |
| 318 | pm11-pm14 | 1.023 | 1.031 | 1.042 | 0.993 | 0.015  | 0.337 |
| 319 | pm11-pm15 | 1.008 | 1.039 | 1.011 | 1.014 | 0.008  | 0.577 |
| 320 | pm11-pm16 | 1.025 | 1.041 | 1.027 | 1.047 | 0.03   | 0.235 |
| 321 | pm11-pm17 | 0.977 | 1.001 | 0.997 | 0.954 | -0.024 | 0.26  |
| 322 | pm11-pm18 | 0.982 | 0.963 | 0.991 | 1.019 | -0.015 | 0.371 |
| 323 | pm11-pm19 | 0.971 | 0.976 | 0.978 | 0.985 | -0.027 | 0.264 |
| 324 | pm11-pm20 | 0.982 | 1.038 | 0.995 | 0.986 | -0.007 | 0.59  |
| 325 | pm11-pm21 | 1.105 | 1.276 | 1.357 | 1.003 | -0.08  | 0.014 |
| 326 | pm11-pm22 | 1.05  | 1.179 | 1.084 | 1.041 | 0.005  | 0.755 |
| 327 | pm11-pm23 | 1.065 | 1.247 | 1.115 | 1.064 | -0.004 | 0.706 |
| 328 | pm11-pm24 | 0.979 | 1.031 | 1.021 | 0.993 | -0.003 | 0.833 |
| 329 | pm11-pm25 | 1.02  | 1.02  | 1.001 | 1.014 | 0.009  | 0.498 |
| 330 | pm11-pm26 | 0.969 | 1     | 1     | 0.983 | -0.017 | 0.339 |
| 331 | pm11-pm27 | 1.007 | 1.042 | 1.028 | 0.983 | -0.011 | 0.346 |
| 332 | pm11-pm28 | 1.259 | 1.037 | 1.104 | 1.337 | -0.076 | 0.019 |
| 333 | pm11-pm29 | 1.021 | 1.177 | 0.986 | 1.093 | -0.012 | 0.396 |
| 334 | pm11-pm30 | 0.917 | 0.894 | 0.955 | 0.918 | 0.003  | 0.731 |
| 335 | pm11-pm31 | 1.025 | 1.026 | 1.016 | 1.007 | -0.01  | 0.52  |
| 336 | pm11-pm32 | 0.997 | 1.126 | 0.993 | 1.026 | -0.007 | 0.568 |
| 337 | pm11-pm33 | 1.01  | 1     | 0.973 | 1.039 | 0.001  | 0.933 |
| 338 | pm11-pm34 | 0.986 | 1.046 | 1.001 | 0.971 | -0.008 | 0.46  |
| 339 | pm11-pm35 | 0.974 | 1.015 | 1.017 | 1.002 | -0.008 | 0.581 |
| 340 | pm11-pm36 | 1.011 | 0.998 | 0.985 | 1.019 | 0      | 0.911 |

|     |           |       |       |       |       |        |       |
|-----|-----------|-------|-------|-------|-------|--------|-------|
| 341 | pm11-pm37 | 1.004 | 0.989 | 0.987 | 1.046 | 0      | 0.65  |
| 342 | pm12-pm13 | 1.075 | 1.172 | 0.994 | 1.243 | -0.07  | 0.034 |
| 343 | pm12-pm14 | 1.102 | 1.198 | 1.073 | 1.226 | -0.036 | 0.222 |
| 344 | pm12-pm15 | 1.087 | 1.12  | 1.017 | 1.252 | -0.07  | 0.029 |
| 345 | pm12-pm16 | 1.132 | 1.22  | 1.017 | 1.244 | -0.03  | 0.232 |
| 346 | pm12-pm17 | 1.105 | 1.215 | 1.015 | 1.233 | -0.042 | 0.182 |
| 347 | pm12-pm18 | 1.09  | 1.161 | 1.041 | 1.209 | -0.057 | 0.033 |
| 348 | pm12-pm19 | 1.095 | 1.163 | 1.036 | 1.209 | -0.057 | 0.026 |
| 349 | pm12-pm20 | 1.122 | 1.142 | 1.01  | 1.214 | -0.063 | 0.038 |
| 350 | pm12-pm21 | 1.272 | 1.536 | 1.428 | 1.255 | -0.071 | 0.016 |
| 351 | pm12-pm22 | 1.154 | 1.35  | 1.149 | 1.245 | -0.037 | 0.297 |
| 352 | pm12-pm23 | 1.178 | 1.426 | 1.134 | 1.312 | -0.043 | 0.195 |
| 353 | pm12-pm24 | 1.079 | 1.168 | 1.024 | 1.234 | -0.06  | 0.023 |
| 354 | pm12-pm25 | 1.099 | 1.168 | 1.069 | 1.224 | -0.043 | 0.159 |
| 355 | pm12-pm26 | 1.104 | 1.168 | 1.036 | 1.22  | -0.051 | 0.023 |
| 356 | pm12-pm27 | 1.115 | 1.193 | 1.072 | 1.26  | -0.044 | 0.172 |
| 357 | pm12-pm28 | 1.403 | 1.197 | 1.184 | 1.65  | -0.08  | 0.013 |
| 358 | pm12-pm29 | 1.122 | 1.448 | 1.056 | 1.3   | -0.028 | 0.238 |
| 359 | pm12-pm30 | 1.067 | 1.051 | 0.973 | 1.12  | -0.043 | 0.156 |
| 360 | pm12-pm31 | 1.112 | 1.215 | 1.062 | 1.239 | -0.05  | 0.198 |
| 361 | pm12-pm32 | 1.085 | 1.297 | 1.027 | 1.275 | -0.05  | 0.191 |
| 362 | pm12-pm33 | 1.071 | 1.125 | 1.046 | 1.201 | -0.072 | 0.019 |
| 363 | pm12-pm34 | 1.112 | 1.205 | 1.026 | 1.162 | -0.061 | 0.021 |
| 364 | pm12-pm35 | 1.088 | 1.226 | 1.037 | 1.169 | -0.058 | 0.022 |
| 365 | pm12-pm36 | 1.111 | 1.149 | 1.016 | 1.213 | -0.06  | 0.041 |
| 366 | pm12-pm37 | 1.098 | 1.162 | 1.028 | 1.206 | -0.061 | 0.038 |
| 367 | pm13-pm14 | 0.994 | 1.028 | 0.999 | 1     | -0.005 | 0.863 |
| 368 | pm13-pm15 | 1     | 0.964 | 1.011 | 0.977 | -0.025 | 0.264 |
| 369 | pm13-pm16 | 1     | 0.975 | 0.994 | 1.001 | -0.016 | 0.33  |
| 370 | pm13-pm17 | 0.957 | 0.968 | 1     | 0.952 | -0.04  | 0.296 |

|     |           |       |       |       |       |        |       |
|-----|-----------|-------|-------|-------|-------|--------|-------|
| 371 | pm13-pm18 | 1.009 | 1.045 | 1.003 | 0.952 | -0.004 | 0.817 |
| 372 | pm13-pm19 | 1.002 | 1.027 | 0.992 | 0.965 | -0.011 | 0.353 |
| 373 | pm13-pm20 | 1.011 | 1.03  | 1.008 | 1.017 | 0.007  | 0.547 |
| 374 | pm13-pm21 | 1.116 | 1.332 | 1.398 | 0.999 | -0.057 | 0.021 |
| 375 | pm13-pm22 | 1.017 | 1.166 | 1.095 | 1     | -0.017 | 0.377 |
| 376 | pm13-pm23 | 1.099 | 1.22  | 1.104 | 1.036 | -0.015 | 0.363 |
| 377 | pm13-pm24 | 0.984 | 1.062 | 1.006 | 0.998 | 0.001  | 0.921 |
| 378 | pm13-pm25 | 0.979 | 1.035 | 1.002 | 0.984 | -0.007 | 0.525 |
| 379 | pm13-pm26 | 0.995 | 1.047 | 0.969 | 0.994 | -0.006 | 0.424 |
| 380 | pm13-pm27 | 0.971 | 1.067 | 0.999 | 0.998 | -0.021 | 0.214 |
| 381 | pm13-pm28 | 1.242 | 1.13  | 1.148 | 1.348 | -0.046 | 0.19  |
| 382 | pm13-pm29 | 0.968 | 1.129 | 0.964 | 1.052 | -0.056 | 0.037 |
| 383 | pm13-pm30 | 0.894 | 0.895 | 0.919 | 0.872 | -0.026 | 0.236 |
| 384 | pm13-pm31 | 1.011 | 1.025 | 1.005 | 1.007 | -0.019 | 0.311 |
| 385 | pm13-pm32 | 1.01  | 1.17  | 0.992 | 1.007 | 0      | 0.861 |
| 386 | pm13-pm33 | 1.027 | 1.044 | 0.997 | 0.973 | 0.003  | 0.938 |
| 387 | pm13-pm34 | 1.01  | 0.999 | 0.964 | 0.971 | -0.025 | 0.216 |
| 388 | pm13-pm35 | 0.961 | 1.017 | 0.972 | 0.962 | -0.035 | 0.218 |
| 389 | pm13-pm36 | 0.981 | 1.031 | 0.988 | 0.992 | -0.009 | 0.416 |
| 390 | pm13-pm37 | 0.99  | 1.034 | 1.009 | 0.983 | -0.006 | 0.592 |
| 391 | pm14-pm15 | 0.991 | 0.955 | 1.031 | 0.987 | -0.017 | 0.348 |
| 392 | pm14-pm16 | 0.993 | 0.978 | 1.007 | 0.952 | -0.02  | 0.298 |
| 393 | pm14-pm17 | 0.976 | 0.99  | 1.018 | 0.972 | -0.015 | 0.319 |
| 394 | pm14-pm18 | 1.015 | 1.058 | 1.004 | 0.987 | 0.015  | 0.328 |
| 395 | pm14-pm19 | 0.993 | 1.058 | 1.006 | 0.971 | 0.006  | 0.6   |
| 396 | pm14-pm20 | 0.99  | 1.04  | 1.004 | 0.981 | -0.001 | 0.799 |
| 397 | pm14-pm21 | 1.105 | 1.315 | 1.395 | 1.009 | -0.057 | 0.027 |
| 398 | pm14-pm22 | 1.068 | 1.161 | 1.107 | 1.007 | 0.005  | 0.728 |
| 399 | pm14-pm23 | 1.063 | 1.19  | 1.11  | 1.028 | -0.026 | 0.298 |
| 400 | pm14-pm24 | 1.007 | 1.025 | 1.009 | 0.999 | 0.004  | 0.785 |

|     |           |       |       |       |       |        |       |
|-----|-----------|-------|-------|-------|-------|--------|-------|
| 401 | pm14-pm25 | 1.021 | 1.048 | 1.005 | 1.001 | 0.017  | 0.32  |
| 402 | pm14-pm26 | 1.012 | 1.041 | 1.017 | 0.993 | 0.014  | 0.316 |
| 403 | pm14-pm27 | 1.016 | 1.058 | 1.041 | 1.008 | 0.007  | 0.415 |
| 404 | pm14-pm28 | 1.254 | 1.108 | 1.104 | 1.326 | -0.06  | 0.035 |
| 405 | pm14-pm29 | 0.972 | 1.128 | 0.985 | 1.028 | -0.051 | 0.043 |
| 406 | pm14-pm30 | 0.913 | 0.877 | 0.95  | 0.877 | -0.011 | 0.306 |
| 407 | pm14-pm31 | 1.042 | 1.106 | 1.011 | 1.004 | 0.015  | 0.385 |
| 408 | pm14-pm32 | 1.009 | 1.147 | 1.021 | 1.021 | 0.009  | 0.579 |
| 409 | pm14-pm33 | 1.012 | 1.023 | 1.018 | 0.991 | 0.009  | 0.578 |
| 410 | pm14-pm34 | 0.983 | 1.021 | 0.982 | 0.976 | -0.016 | 0.302 |
| 411 | pm14-pm35 | 0.983 | 0.997 | 1.029 | 0.993 | -0.007 | 0.458 |
| 412 | pm14-pm36 | 0.985 | 1.006 | 1.018 | 1     | 0.001  | 0.766 |
| 413 | pm14-pm37 | 1.008 | 1.028 | 0.99  | 1     | 0.002  | 0.836 |
| 414 | pm15-pm16 | 1.014 | 1.012 | 1.017 | 1.019 | 0.01   | 0.508 |
| 415 | pm15-pm17 | 1.014 | 0.986 | 1.022 | 0.999 | -0.001 | 0.701 |
| 416 | pm15-pm18 | 0.97  | 1.019 | 1.022 | 0.997 | -0.002 | 0.898 |
| 417 | pm15-pm19 | 1.009 | 0.999 | 1.013 | 1.032 | 0.009  | 0.455 |
| 418 | pm15-pm20 | 1.009 | 1.031 | 1.043 | 0.971 | 0.006  | 0.432 |
| 419 | pm15-pm21 | 1.104 | 1.269 | 1.383 | 1.05  | -0.064 | 0.039 |
| 420 | pm15-pm22 | 1.067 | 1.112 | 1.087 | 1.015 | -0.014 | 0.306 |
| 421 | pm15-pm23 | 1.068 | 1.236 | 1.069 | 1.003 | -0.033 | 0.24  |
| 422 | pm15-pm24 | 1.005 | 0.986 | 1.024 | 1.031 | 0.002  | 0.922 |
| 423 | pm15-pm25 | 0.997 | 1.051 | 1.022 | 0.993 | 0.011  | 0.38  |
| 424 | pm15-pm26 | 0.989 | 1.048 | 1.039 | 1.021 | 0.019  | 0.363 |
| 425 | pm15-pm27 | 0.995 | 1.068 | 1.023 | 1.019 | 0      | 0.66  |
| 426 | pm15-pm28 | 1.238 | 1.103 | 1.212 | 1.348 | -0.036 | 0.209 |
| 427 | pm15-pm29 | 1.015 | 1.095 | 0.995 | 1.1   | -0.031 | 0.223 |
| 428 | pm15-pm30 | 0.894 | 0.903 | 0.991 | 0.889 | 0.001  | 0.613 |
| 429 | pm15-pm31 | 1.027 | 1.047 | 1.05  | 1.018 | 0.007  | 0.482 |
| 430 | pm15-pm32 | 0.97  | 1.107 | 1.028 | 1.033 | -0.009 | 0.509 |

|     |           |       |       |       |       |        |       |
|-----|-----------|-------|-------|-------|-------|--------|-------|
| 431 | pm15-pm33 | 0.959 | 1.003 | 1.034 | 1.002 | -0.006 | 0.566 |
| 432 | pm15-pm34 | 1.027 | 0.987 | 1.012 | 0.982 | -0.007 | 0.566 |
| 433 | pm15-pm35 | 0.967 | 0.972 | 0.992 | 1     | -0.028 | 0.267 |
| 434 | pm15-pm36 | 0.985 | 1.039 | 1.012 | 0.995 | 0.004  | 0.933 |
| 435 | pm15-pm37 | 0.991 | 1.022 | 1.017 | 0.995 | -0.001 | 0.991 |
| 436 | pm16-pm17 | 0.963 | 1.012 | 1.011 | 0.991 | -0.007 | 0.572 |
| 437 | pm16-pm18 | 0.99  | 1.004 | 1.02  | 1.001 | 0.005  | 0.73  |
| 438 | pm16-pm19 | 0.998 | 1.027 | 1.021 | 0.989 | 0.01   | 0.586 |
| 439 | pm16-pm20 | 0.979 | 0.999 | 1.001 | 0.974 | -0.014 | 0.396 |
| 440 | pm16-pm21 | 1.135 | 1.327 | 1.36  | 1.025 | -0.049 | 0.177 |
| 441 | pm16-pm22 | 1.037 | 1.163 | 1.072 | 1.003 | -0.01  | 0.538 |
| 442 | pm16-pm23 | 1.077 | 1.216 | 1.101 | 1.012 | -0.02  | 0.266 |
| 443 | pm16-pm24 | 0.995 | 1.048 | 1.017 | 0.994 | 0.01   | 0.575 |
| 444 | pm16-pm25 | 0.827 | 1.047 | 1.033 | 1.178 | 0.022  | 0.266 |
| 445 | pm16-pm26 | 1.018 | 1.049 | 1.006 | 0.985 | 0.015  | 0.303 |
| 446 | pm16-pm27 | 1.018 | 1.059 | 1.018 | 0.996 | 0.001  | 0.871 |
| 447 | pm16-pm28 | 1.231 | 1.132 | 1.113 | 1.374 | -0.043 | 0.179 |
| 448 | pm16-pm29 | 1.043 | 1.18  | 0.955 | 1.053 | -0.019 | 0.347 |
| 449 | pm16-pm30 | 0.903 | 0.846 | 0.928 | 0.919 | -0.014 | 0.357 |
| 450 | pm16-pm31 | 1.004 | 1.067 | 1.049 | 0.996 | 0.006  | 0.415 |
| 451 | pm16-pm32 | 0.983 | 1.107 | 1.027 | 1.064 | 0.008  | 0.485 |
| 452 | pm16-pm33 | 1.021 | 1.038 | 0.982 | 0.987 | 0.007  | 0.548 |
| 453 | pm16-pm34 | 1.018 | 0.961 | 1.025 | 0.96  | -0.013 | 0.397 |
| 454 | pm16-pm35 | 0.971 | 0.97  | 1.004 | 0.976 | -0.024 | 0.288 |
| 455 | pm16-pm36 | 0.996 | 0.984 | 1.008 | 1.004 | -0.001 | 0.918 |
| 456 | pm16-pm37 | 0.994 | 1.024 | 1.021 | 1.007 | 0.01   | 0.394 |
| 457 | pm17-pm18 | 0.976 | 0.975 | 1.023 | 0.987 | -0.01  | 0.53  |
| 458 | pm17-pm19 | 1.007 | 1.003 | 1.044 | 1.005 | 0.015  | 0.382 |
| 459 | pm17-pm20 | 0.961 | 1.027 | 1.004 | 0.98  | -0.01  | 0.319 |
| 460 | pm17-pm21 | 1.089 | 1.251 | 1.38  | 0.971 | -0.089 | 0.012 |

|     |           |       |       |       |       |        |       |
|-----|-----------|-------|-------|-------|-------|--------|-------|
| 461 | pm17-pm22 | 1.045 | 1.096 | 1.084 | 0.975 | -0.03  | 0.285 |
| 462 | pm17-pm23 | 1.088 | 1.202 | 1.126 | 1.014 | -0.016 | 0.371 |
| 463 | pm17-pm24 | 1.023 | 1.025 | 1.041 | 0.994 | 0.016  | 0.334 |
| 464 | pm17-pm25 | 1.007 | 1.035 | 1.015 | 0.991 | 0.011  | 0.33  |
| 465 | pm17-pm26 | 0.984 | 1.038 | 0.989 | 1.003 | 0.003  | 0.741 |
| 466 | pm17-pm27 | 1.016 | 0.97  | 1.013 | 0.997 | -0.023 | 0.272 |
| 467 | pm17-pm28 | 1.223 | 1.09  | 1.188 | 1.35  | -0.043 | 0.189 |
| 468 | pm17-pm29 | 0.998 | 1.173 | 0.956 | 1.024 | -0.04  | 0.267 |
| 469 | pm17-pm30 | 0.894 | 0.862 | 0.925 | 0.869 | -0.026 | 0.254 |
| 470 | pm17-pm31 | 0.981 | 1.035 | 1.049 | 0.986 | -0.011 | 0.301 |
| 471 | pm17-pm32 | 1.006 | 1.144 | 1.006 | 1.013 | 0.004  | 0.846 |
| 472 | pm17-pm33 | 0.99  | 0.995 | 0.997 | 0.974 | -0.012 | 0.308 |
| 473 | pm17-pm34 | 0.969 | 0.947 | 0.984 | 0.957 | -0.04  | 0.15  |
| 474 | pm17-pm35 | 0.989 | 0.962 | 1.021 | 0.983 | -0.017 | 0.35  |
| 475 | pm17-pm36 | 1.001 | 1     | 1.016 | 0.964 | -0.005 | 0.646 |
| 476 | pm17-pm37 | 0.972 | 1.002 | 0.97  | 1.001 | -0.017 | 0.356 |
| 477 | pm18-pm19 | 0.998 | 0.999 | 0.98  | 1.009 | -0.001 | 0.841 |
| 478 | pm18-pm20 | 0.986 | 0.992 | 0.994 | 0.994 | -0.009 | 0.547 |
| 479 | pm18-pm21 | 1.076 | 1.24  | 1.407 | 1.034 | -0.07  | 0.013 |
| 480 | pm18-pm22 | 1.048 | 1.159 | 1.099 | 0.999 | -0.001 | 0.724 |
| 481 | pm18-pm23 | 1.119 | 1.247 | 1.111 | 1.053 | 0.012  | 0.384 |
| 482 | pm18-pm24 | 0.992 | 1.026 | 1.007 | 1.019 | 0.009  | 0.549 |
| 483 | pm18-pm25 | 1.016 | 0.988 | 1.015 | 1.012 | 0.009  | 0.474 |
| 484 | pm18-pm26 | 0.989 | 0.99  | 1.015 | 0.997 | 0      | 0.629 |
| 485 | pm18-pm27 | 1.007 | 1.023 | 1.016 | 1.032 | 0      | 0.751 |
| 486 | pm18-pm28 | 1.252 | 1.116 | 1.13  | 1.409 | -0.027 | 0.253 |
| 487 | pm18-pm29 | 1.011 | 1.197 | 0.996 | 1.028 | -0.017 | 0.383 |
| 488 | pm18-pm30 | 0.945 | 0.875 | 0.954 | 0.88  | 0.002  | 0.842 |
| 489 | pm18-pm31 | 1.035 | 1.012 | 1.053 | 1.002 | 0.004  | 0.91  |
| 490 | pm18-pm32 | 0.986 | 1.145 | 1.008 | 1.037 | 0.008  | 0.527 |



|     |           |       |       |       |       |        |       |
|-----|-----------|-------|-------|-------|-------|--------|-------|
| 491 | pm18-pm33 | 1.006 | 1.004 | 0.986 | 1.013 | 0.004  | 0.684 |
| 492 | pm18-pm34 | 1.022 | 1.048 | 1.008 | 0.976 | 0.011  | 0.314 |
| 493 | pm18-pm35 | 0.999 | 1.008 | 0.992 | 0.995 | -0.005 | 0.935 |
| 494 | pm18-pm36 | 0.99  | 0.981 | 0.98  | 0.996 | -0.011 | 0.319 |
| 495 | pm18-pm37 | 1.021 | 0.989 | 1.015 | 1.009 | 0.008  | 0.468 |
| 496 | pm19-pm20 | 0.993 | 1.014 | 0.982 | 0.982 | -0.009 | 0.464 |
| 497 | pm19-pm21 | 1.112 | 1.289 | 1.366 | 0.994 | -0.069 | 0.026 |
| 498 | pm19-pm22 | 1.047 | 1.175 | 1.105 | 1.049 | 0.016  | 0.361 |
| 499 | pm19-pm23 | 1.07  | 1.216 | 1.102 | 1.049 | -0.012 | 0.34  |
| 500 | pm19-pm24 | 0.977 | 1.04  | 1.002 | 0.982 | -0.002 | 0.827 |
| 501 | pm19-pm25 | 0.987 | 0.999 | 0.991 | 1.002 | -0.004 | 0.758 |
| 502 | pm19-pm26 | 0.981 | 0.989 | 1.011 | 0.984 | -0.007 | 0.497 |
| 503 | pm19-pm27 | 1.034 | 0.985 | 1.042 | 1.028 | 0.002  | 0.986 |
| 504 | pm19-pm28 | 1.229 | 1.065 | 1.119 | 1.32  | -0.071 | 0.019 |
| 505 | pm19-pm29 | 1.026 | 1.234 | 1.056 | 1.054 | 0.017  | 0.342 |
| 506 | pm19-pm30 | 0.932 | 0.88  | 0.937 | 0.882 | -0.004 | 0.962 |
| 507 | pm19-pm31 | 1.017 | 1.033 | 1.059 | 1.005 | 0.006  | 0.438 |
| 508 | pm19-pm32 | 0.978 | 1.117 | 0.992 | 1.021 | -0.009 | 0.498 |
| 509 | pm19-pm33 | 0.983 | 1.012 | 1     | 0.981 | -0.005 | 0.966 |
| 510 | pm19-pm34 | 0.988 | 1.04  | 1.014 | 0.986 | 0.004  | 0.696 |
| 511 | pm19-pm35 | 1.016 | 1.043 | 0.988 | 0.99  | 0.005  | 0.424 |
| 512 | pm19-pm36 | 0.988 | 0.981 | 1.014 | 0.996 | -0.003 | 0.828 |
| 513 | pm19-pm37 | 1.01  | 0.993 | 1.022 | 1.011 | 0.008  | 0.44  |
| 514 | pm20-pm21 | 1.113 | 1.219 | 1.417 | 1.008 | -0.073 | 0.017 |
| 515 | pm20-pm22 | 1.063 | 1.156 | 1.077 | 0.996 | -0.008 | 0.53  |
| 516 | pm20-pm23 | 1.07  | 1.255 | 1.107 | 1.038 | -0.007 | 0.495 |
| 517 | pm20-pm24 | 1.006 | 1.017 | 0.976 | 0.99  | -0.008 | 0.437 |
| 518 | pm20-pm25 | 0.99  | 0.991 | 0.985 | 0.996 | -0.011 | 0.335 |
| 519 | pm20-pm26 | 1.013 | 0.995 | 1.016 | 0.993 | 0.003  | 0.672 |
| 520 | pm20-pm27 | 1.019 | 1.07  | 1.016 | 1.021 | 0.008  | 0.593 |

|     |           |       |       |       |       |        |       |
|-----|-----------|-------|-------|-------|-------|--------|-------|
| 521 | pm20-pm28 | 1.214 | 1.078 | 1.136 | 1.367 | -0.059 | 0.026 |
| 522 | pm20-pm29 | 1.068 | 1.153 | 0.995 | 1.074 | -0.006 | 0.419 |
| 523 | pm20-pm30 | 0.939 | 0.893 | 0.952 | 0.866 | -0.002 | 0.642 |
| 524 | pm20-pm31 | 1.045 | 1.046 | 1.013 | 1.02  | 0.005  | 0.4   |
| 525 | pm20-pm32 | 0.987 | 1.162 | 1.003 | 1.049 | 0.011  | 0.383 |
| 526 | pm20-pm33 | 0.989 | 1.049 | 1.005 | 0.991 | 0.007  | 0.553 |
| 527 | pm20-pm34 | 1.003 | 1.063 | 1.011 | 0.976 | 0.007  | 0.564 |
| 528 | pm20-pm35 | 0.999 | 1.023 | 0.972 | 0.998 | -0.009 | 0.571 |
| 529 | pm20-pm36 | 0.984 | 1.003 | 1.009 | 1.009 | 0.001  | 0.699 |
| 530 | pm20-pm37 | 0.992 | 0.999 | 1.01  | 0.989 | -0.006 | 0.425 |
| 531 | pm21-pm22 | 1.19  | 1.403 | 1.445 | 1.059 | -0.065 | 0.025 |
| 532 | pm21-pm23 | 1.209 | 1.533 | 1.539 | 1.063 | -0.046 | 0.167 |
| 533 | pm21-pm24 | 1.11  | 1.311 | 1.388 | 1.03  | -0.054 | 0.028 |
| 534 | pm21-pm25 | 1.111 | 1.282 | 1.381 | 1.027 | -0.06  | 0.025 |
| 535 | pm21-pm26 | 1.109 | 1.28  | 1.365 | 1.018 | -0.067 | 0.036 |
| 536 | pm21-pm27 | 1.083 | 1.272 | 1.357 | 1.062 | -0.088 | 0.017 |
| 537 | pm21-pm28 | 1.354 | 1.35  | 1.529 | 1.351 | -0.12  | 0.008 |
| 538 | pm21-pm29 | 1.105 | 1.513 | 1.397 | 1.08  | -0.063 | 0.036 |
| 539 | pm21-pm30 | 1.019 | 1.174 | 1.368 | 0.904 | -0.057 | 0.033 |
| 540 | pm21-pm31 | 1.141 | 1.343 | 1.35  | 1.05  | -0.063 | 0.025 |
| 541 | pm21-pm32 | 1.124 | 1.467 | 1.387 | 1.045 | -0.042 | 0.193 |
| 542 | pm21-pm33 | 1.146 | 1.278 | 1.381 | 1.021 | -0.054 | 0.04  |
| 543 | pm21-pm34 | 1.121 | 1.303 | 1.359 | 0.988 | -0.072 | 0.019 |
| 544 | pm21-pm35 | 1.125 | 1.267 | 1.382 | 1.046 | -0.06  | 0.02  |
| 545 | pm21-pm36 | 1.12  | 1.306 | 1.384 | 1.027 | -0.05  | 0.156 |
| 546 | pm21-pm37 | 1.142 | 1.306 | 1.355 | 1.02  | -0.057 | 0.025 |
| 547 | pm22-pm23 | 1.353 | 1.527 | 1.429 | 1.048 | 0.138  | 0.008 |
| 548 | pm22-pm24 | 1.055 | 1.218 | 1.077 | 1.033 | 0.014  | 0.347 |
| 549 | pm22-pm25 | 1.058 | 1.104 | 1.118 | 1.013 | -0.005 | 0.962 |
| 550 | pm22-pm26 | 1.036 | 1.178 | 1.093 | 1.039 | 0.008  | 0.537 |

|     |           |       |       |       |       |        |       |
|-----|-----------|-------|-------|-------|-------|--------|-------|
| 551 | pm22-pm27 | 1.066 | 1.196 | 1.142 | 1.005 | 0.002  | 0.872 |
| 552 | pm22-pm28 | 1.305 | 1.273 | 1.295 | 1.432 | -0.008 | 0.44  |
| 553 | pm22-pm29 | 1.111 | 1.291 | 1.078 | 1.076 | -0.016 | 0.39  |
| 554 | pm22-pm30 | 0.928 | 1.014 | 1.052 | 0.93  | -0.01  | 0.325 |
| 555 | pm22-pm31 | 1.07  | 1.201 | 1.076 | 1.03  | -0.008 | 0.431 |
| 556 | pm22-pm32 | 1.072 | 1.279 | 1.066 | 1.068 | 0.005  | 0.564 |
| 557 | pm22-pm33 | 1.025 | 1.134 | 1.094 | 1.018 | -0.01  | 0.309 |
| 558 | pm22-pm34 | 1.04  | 1.138 | 1.073 | 1.039 | -0.01  | 0.527 |
| 559 | pm22-pm35 | 1.05  | 1.099 | 1.088 | 1.015 | -0.021 | 0.271 |
| 560 | pm22-pm36 | 1.043 | 1.142 | 1.116 | 1.034 | 0.006  | 0.497 |
| 561 | pm22-pm37 | 1.063 | 1.155 | 1.121 | 1.026 | 0.011  | 0.36  |
| 562 | pm23-pm24 | 1.139 | 1.238 | 1.116 | 1.06  | 0.013  | 0.399 |
| 563 | pm23-pm25 | 1.042 | 1.269 | 1.096 | 1.02  | -0.015 | 0.357 |
| 564 | pm23-pm26 | 1.093 | 1.262 | 1.107 | 1.036 | 0.003  | 0.672 |
| 565 | pm23-pm27 | 1.122 | 1.272 | 1.122 | 1.024 | -0.008 | 0.578 |
| 566 | pm23-pm28 | 1.37  | 1.392 | 1.245 | 1.388 | -0.028 | 0.262 |
| 567 | pm23-pm29 | 1.072 | 1.419 | 1.06  | 1.088 | -0.039 | 0.201 |
| 568 | pm23-pm30 | 0.989 | 1.115 | 1.063 | 0.94  | -0.008 | 0.524 |
| 569 | pm23-pm31 | 1.107 | 1.29  | 1.123 | 1.044 | -0.004 | 0.982 |
| 570 | pm23-pm32 | 1.084 | 1.413 | 1.115 | 1.093 | 0.017  | 0.397 |
| 571 | pm23-pm33 | 1.078 | 1.269 | 1.112 | 1.028 | 0      | 0.976 |
| 572 | pm23-pm34 | 1.078 | 1.246 | 1.082 | 1.019 | -0.019 | 0.322 |
| 573 | pm23-pm35 | 1.059 | 1.242 | 1.106 | 1.013 | -0.022 | 0.222 |
| 574 | pm23-pm36 | 1.089 | 1.203 | 1.111 | 1.04  | -0.01  | 0.498 |
| 575 | pm23-pm37 | 1.062 | 1.281 | 1.104 | 1.048 | 0      | 0.955 |
| 576 | pm24-pm25 | 0.994 | 0.978 | 1.005 | 1.017 | -0.004 | 0.688 |
| 577 | pm24-pm26 | 0.988 | 1.042 | 0.986 | 0.981 | -0.004 | 0.614 |
| 578 | pm24-pm27 | 1.004 | 1.113 | 1.041 | 1.014 | 0.018  | 0.339 |
| 579 | pm24-pm28 | 1.268 | 1.12  | 1.181 | 1.349 | -0.029 | 0.271 |
| 580 | pm24-pm29 | 0.977 | 1.164 | 1.023 | 1.03  | -0.032 | 0.252 |

|     |           |       |       |       |       |        |       |
|-----|-----------|-------|-------|-------|-------|--------|-------|
| 581 | pm24-pm30 | 0.885 | 0.922 | 0.94  | 0.915 | -0.001 | 0.601 |
| 582 | pm24-pm31 | 1.02  | 1.076 | 1.022 | 1.022 | 0.009  | 0.481 |
| 583 | pm24-pm32 | 1.007 | 1.141 | 1.02  | 1.034 | 0.01   | 0.423 |
| 584 | pm24-pm33 | 0.981 | 0.991 | 0.991 | 0.987 | -0.015 | 0.33  |
| 585 | pm24-pm34 | 1.018 | 1.042 | 0.991 | 0.981 | 0.001  | 0.871 |
| 586 | pm24-pm35 | 1.002 | 0.979 | 1.02  | 0.996 | -0.009 | 0.457 |
| 587 | pm24-pm36 | 0.993 | 1.01  | 1.019 | 0.995 | 0.002  | 0.856 |
| 588 | pm24-pm37 | 0.998 | 1.007 | 1.003 | 1.005 | -0.002 | 0.768 |
| 589 | pm25-pm26 | 1.01  | 0.997 | 1.005 | 0.982 | 0      | 0.998 |
| 590 | pm25-pm27 | 1.018 | 1.03  | 1.016 | 1.027 | 0.002  | 0.873 |
| 591 | pm25-pm28 | 1.246 | 1.044 | 1.142 | 1.342 | -0.062 | 0.033 |
| 592 | pm25-pm29 | 0.999 | 1.148 | 1.005 | 1.026 | -0.032 | 0.253 |
| 593 | pm25-pm30 | 0.931 | 0.896 | 0.968 | 0.907 | 0.013  | 0.306 |
| 594 | pm25-pm31 | 1.028 | 1.045 | 1.047 | 0.985 | 0.003  | 0.765 |
| 595 | pm25-pm32 | 0.992 | 1.108 | 1.007 | 1.039 | -0.001 | 0.671 |
| 596 | pm25-pm33 | 1.014 | 0.982 | 1.01  | 0.999 | 0.002  | 0.799 |
| 597 | pm25-pm34 | 1.006 | 1.029 | 0.986 | 1.014 | 0.006  | 0.458 |
| 598 | pm25-pm35 | 0.982 | 0.988 | 0.989 | 0.96  | -0.025 | 0.228 |
| 599 | pm25-pm36 | 0.993 | 1.016 | 1.014 | 1.017 | 0.012  | 0.303 |
| 600 | pm25-pm37 | 1.014 | 0.99  | 1.008 | 1.024 | 0.008  | 0.597 |
| 601 | pm26-pm27 | 1.02  | 1.033 | 1.032 | 0.987 | -0.003 | 0.656 |
| 602 | pm26-pm28 | 1.223 | 1.062 | 1.1   | 1.38  | -0.063 | 0.03  |
| 603 | pm26-pm29 | 0.99  | 1.146 | 0.983 | 1.086 | -0.025 | 0.251 |
| 604 | pm26-pm30 | 0.935 | 0.913 | 0.942 | 0.889 | 0.007  | 0.405 |
| 605 | pm26-pm31 | 0.999 | 1.055 | 1.017 | 1.018 | 0      | 0.778 |
| 606 | pm26-pm32 | 0.987 | 1.091 | 1.009 | 1.016 | -0.011 | 0.341 |
| 607 | pm26-pm33 | 0.981 | 1.006 | 0.995 | 0.987 | -0.007 | 0.493 |
| 608 | pm26-pm34 | 1.006 | 1.024 | 1.015 | 0.997 | 0.007  | 0.581 |
| 609 | pm26-pm35 | 1.007 | 1.077 | 0.977 | 0.987 | 0.008  | 0.592 |
| 610 | pm26-pm36 | 1.004 | 0.979 | 1.007 | 1.006 | 0.001  | 0.762 |

|     |           |       |       |       |       |        |       |
|-----|-----------|-------|-------|-------|-------|--------|-------|
| 611 | pm26-pm37 | 0.992 | 1.016 | 1.008 | 1.02  | 0.007  | 0.509 |
| 612 | pm27-pm28 | 1.221 | 1.129 | 1.148 | 1.374 | -0.058 | 0.043 |
| 613 | pm27-pm29 | 1.04  | 1.239 | 0.998 | 1.036 | -0.02  | 0.366 |
| 614 | pm27-pm30 | 0.936 | 0.93  | 0.969 | 0.893 | -0.002 | 0.708 |
| 615 | pm27-pm31 | 1.004 | 1.107 | 1.073 | 0.991 | -0.001 | 0.831 |
| 616 | pm27-pm32 | 0.999 | 1.164 | 1.026 | 1.053 | 0.002  | 0.722 |
| 617 | pm27-pm33 | 0.992 | 1.019 | 0.997 | 1.003 | -0.018 | 0.322 |
| 618 | pm27-pm34 | 1.046 | 1.058 | 1.049 | 0.984 | 0.01   | 0.442 |
| 619 | pm27-pm35 | 1.014 | 1.092 | 1.022 | 1.02  | 0.011  | 0.324 |
| 620 | pm27-pm36 | 1.03  | 1.072 | 1.012 | 1.009 | 0.011  | 0.343 |
| 621 | pm27-pm37 | 1.029 | 1.034 | 1.012 | 1.026 | 0.003  | 0.65  |
| 622 | pm28-pm29 | 1.332 | 1.212 | 1.095 | 1.479 | -0.052 | 0.042 |
| 623 | pm28-pm30 | 1.151 | 0.968 | 1.089 | 1.238 | -0.057 | 0.024 |
| 624 | pm28-pm31 | 1.278 | 1.108 | 1.152 | 1.379 | -0.049 | 0.157 |
| 625 | pm28-pm32 | 1.226 | 1.182 | 1.156 | 1.4   | -0.052 | 0.042 |
| 626 | pm28-pm33 | 1.206 | 1.018 | 1.11  | 1.354 | -0.083 | 0.016 |
| 627 | pm28-pm34 | 1.249 | 1.114 | 1.148 | 1.384 | -0.035 | 0.259 |
| 628 | pm28-pm35 | 1.238 | 1.083 | 1.13  | 1.321 | -0.067 | 0.043 |
| 629 | pm28-pm36 | 1.198 | 1.091 | 1.122 | 1.296 | -0.077 | 0.014 |
| 630 | pm28-pm37 | 1.21  | 1.049 | 1.121 | 1.348 | -0.075 | 0.01  |
| 631 | pm29-pm30 | 0.918 | 1.291 | 0.787 | 1.132 | 0.043  | 0.177 |
| 632 | pm29-pm31 | 1.025 | 1.238 | 1.011 | 1.104 | -0.005 | 0.452 |
| 633 | pm29-pm32 | 1.039 | 1.31  | 0.991 | 1.085 | -0.008 | 0.424 |
| 634 | pm29-pm33 | 0.969 | 1.158 | 0.992 | 1.048 | -0.035 | 0.281 |
| 635 | pm29-pm34 | 1.011 | 1.154 | 0.981 | 1.01  | -0.041 | 0.154 |
| 636 | pm29-pm35 | 1.015 | 1.119 | 0.981 | 1.066 | -0.036 | 0.258 |
| 637 | pm29-pm36 | 1.002 | 1.163 | 1.021 | 1.082 | -0.009 | 0.578 |
| 638 | pm29-pm37 | 1.011 | 1.192 | 1.002 | 1.056 | -0.013 | 0.309 |
| 639 | pm30-pm31 | 0.935 | 0.971 | 0.997 | 0.877 | 0.009  | 0.519 |
| 640 | pm30-pm32 | 0.93  | 0.975 | 0.984 | 0.936 | 0.006  | 0.586 |

|     |           |       |       |       |       |        |       |
|-----|-----------|-------|-------|-------|-------|--------|-------|
| 641 | pm30-pm33 | 0.941 | 0.91  | 0.969 | 0.93  | 0.025  | 0.288 |
| 642 | pm30-pm34 | 0.895 | 0.894 | 0.975 | 0.886 | -0.004 | 0.924 |
| 643 | pm30-pm35 | 0.942 | 0.905 | 0.971 | 0.894 | 0.01   | 0.376 |
| 644 | pm30-pm36 | 0.957 | 0.895 | 0.939 | 0.922 | 0.017  | 0.383 |
| 645 | pm30-pm37 | 0.95  | 0.872 | 0.921 | 0.935 | 0.005  | 0.571 |
| 646 | pm31-pm32 | 0.995 | 1.178 | 1.025 | 1.042 | -0.001 | 0.802 |
| 647 | pm31-pm33 | 1.031 | 0.998 | 1.034 | 1.016 | -0.003 | 0.72  |
| 648 | pm31-pm34 | 1.001 | 1.063 | 1.035 | 1.015 | 0.002  | 0.962 |
| 649 | pm31-pm35 | 1.01  | 1.056 | 1.037 | 0.997 | -0.003 | 0.879 |
| 650 | pm31-pm36 | 1.008 | 1.047 | 1.05  | 1.027 | 0.011  | 0.361 |
| 651 | pm31-pm37 | 1.015 | 1.066 | 1.035 | 1.03  | 0.012  | 0.366 |
| 652 | pm32-pm33 | 0.982 | 1.151 | 1.032 | 1.015 | 0.008  | 0.494 |
| 653 | pm32-pm34 | 1.013 | 1.187 | 1.005 | 1.01  | 0.013  | 0.386 |
| 654 | pm32-pm35 | 1.021 | 1.101 | 0.993 | 1.046 | -0.002 | 0.716 |
| 655 | pm32-pm36 | 1.006 | 1.148 | 0.987 | 1.014 | 0.002  | 0.722 |
| 656 | pm32-pm37 | 0.987 | 1.161 | 1.01  | 1.016 | 0.004  | 0.958 |
| 657 | pm33-pm34 | 0.987 | 1.163 | 1.006 | 0.985 | 0.032  | 0.276 |
| 658 | pm33-pm35 | 1.001 | 1.037 | 0.993 | 0.996 | 0.002  | 0.67  |
| 659 | pm33-pm36 | 1.002 | 0.99  | 0.995 | 1.014 | 0.002  | 0.975 |
| 660 | pm33-pm37 | 1.012 | 1.014 | 0.99  | 1.023 | 0.008  | 0.432 |
| 661 | pm34-pm35 | 1.035 | 0.996 | 1.017 | 0.973 | -0.003 | 0.646 |
| 662 | pm34-pm36 | 1.026 | 1.026 | 1.034 | 1.003 | 0.019  | 0.337 |
| 663 | pm34-pm37 | 1.018 | 1.031 | 1.002 | 1.014 | 0.011  | 0.383 |
| 664 | pm35-pm36 | 1.025 | 1.054 | 0.968 | 0.996 | 0.007  | 0.503 |
| 665 | pm35-pm37 | 0.988 | 0.999 | 1.002 | 0.997 | -0.01  | 0.339 |
| 666 | pm36-pm37 | 0.985 | 1.007 | 1.005 | 0.995 | -0.003 | 0.89  |

3c) Result of two-distribution perturbation analysis for apoptosis when each response function was separately applied (100 million parameter sets)

| No. | Pair of perturbed parameter distributions | Lin   | Hill  | Sat   | Acc   | Synergistic effect | p-value |
|-----|-------------------------------------------|-------|-------|-------|-------|--------------------|---------|
| 1   | pm1-pm2                                   | 1.03  | 1.057 | 1.034 | 1.045 | 0.028              | 0.23    |
| 2   | pm1-pm3                                   | 1.034 | 1.069 | 1.058 | 1.055 | 0.032              | 0.273   |
| 3   | pm1-pm4                                   | 1.031 | 1.062 | 1.011 | 1.005 | -0.014             | 0.397   |
| 4   | pm1-pm5                                   | 1.019 | 0.996 | 1.026 | 1.014 | 0                  | 0.939   |
| 5   | pm1-pm6                                   | 1.055 | 1.029 | 1.155 | 1.056 | 0.022              | 0.231   |
| 6   | pm1-pm7                                   | 1.944 | 1.612 | 2.075 | 1.613 | -0.109             | 0.008   |
| 7   | pm1-pm8                                   | 1.013 | 1.033 | 1.022 | 1.002 | 0.005              | 0.835   |
| 8   | pm1-pm9                                   | 1.06  | 1.124 | 1.066 | 1.059 | 0.027              | 0.208   |
| 9   | pm1-pm10                                  | 2.265 | 1.896 | 2.043 | 2.238 | 0.076              | 0.018   |
| 10  | pm1-pm11                                  | 1.025 | 1.087 | 0.99  | 1.029 | 0.012              | 0.371   |
| 11  | pm1-pm12                                  | 1.152 | 1.215 | 1.056 | 1.267 | -0.026             | 0.256   |
| 12  | pm1-pm13                                  | 0.972 | 1.051 | 0.993 | 0.975 | -0.026             | 0.282   |
| 13  | pm1-pm14                                  | 1.012 | 1.071 | 0.993 | 1.046 | 0.012              | 0.361   |
| 14  | pm1-pm15                                  | 1.052 | 1.078 | 1.067 | 1.013 | 0.031              | 0.23    |
| 15  | pm1-pm16                                  | 0.996 | 1.077 | 1.048 | 1.019 | 0.019              | 0.335   |
| 16  | pm1-pm17                                  | 1.002 | 1.045 | 1.028 | 0.988 | -0.001             | 0.759   |
| 17  | pm1-pm18                                  | 0.998 | 0.995 | 1.033 | 1.004 | -0.007             | 0.483   |
| 18  | pm1-pm19                                  | 1.001 | 1.031 | 1.014 | 1.037 | 0.006              | 0.535   |
| 19  | pm1-pm20                                  | 1.012 | 1.032 | 1.01  | 1.033 | 0.004              | 0.634   |
| 20  | pm1-pm21                                  | 1.163 | 1.285 | 1.412 | 1.066 | -0.045             | 0.156   |
| 21  | pm1-pm22                                  | 1.088 | 1.197 | 1.119 | 1.072 | 0.025              | 0.243   |
| 22  | pm1-pm23                                  | 1.119 | 1.245 | 1.15  | 1.087 | 0.013              | 0.38    |
| 23  | pm1-pm24                                  | 1.017 | 1.068 | 1.01  | 1.027 | 0.012              | 0.36    |
| 24  | pm1-pm25                                  | 1.043 | 1.034 | 0.994 | 1.04  | 0.013              | 0.382   |

|    |          |       |       |       |       |        |       |
|----|----------|-------|-------|-------|-------|--------|-------|
| 25 | pm1-pm26 | 1.024 | 1.016 | 1.012 | 1.02  | 0.003  | 0.88  |
| 26 | pm1-pm27 | 1.028 | 1.085 | 1.03  | 1.047 | 0.011  | 0.367 |
| 27 | pm1-pm28 | 1.262 | 1.112 | 1.149 | 1.382 | -0.045 | 0.156 |
| 28 | pm1-pm29 | 0.988 | 1.233 | 1.012 | 1.097 | -0.01  | 0.468 |
| 29 | pm1-pm30 | 0.925 | 0.951 | 0.951 | 0.926 | 0.01   | 0.418 |
| 30 | pm1-pm31 | 1.01  | 1.058 | 1.043 | 1.018 | -0.007 | 0.529 |
| 31 | pm1-pm32 | 1.022 | 1.187 | 1.033 | 1.066 | 0.024  | 0.23  |
| 32 | pm1-pm33 | 1.02  | 1.059 | 1.033 | 1.031 | 0.02   | 0.24  |
| 33 | pm1-pm34 | 1.038 | 1.109 | 1.03  | 0.992 | 0.023  | 0.211 |
| 34 | pm1-pm35 | 1.019 | 1.107 | 1.02  | 1.019 | 0.021  | 0.23  |
| 35 | pm1-pm36 | 1.028 | 1.041 | 1.003 | 1.032 | 0.012  | 0.369 |
| 36 | pm1-pm37 | 1.009 | 1.058 | 1.021 | 1.013 | 0.008  | 0.417 |
| 37 | pm2-pm3  | 1.01  | 1.039 | 1.01  | 0.999 | 0.011  | 0.367 |
| 38 | pm2-pm4  | 0.991 | 1.061 | 1.026 | 0.975 | -0.011 | 0.306 |
| 39 | pm2-pm5  | 1.004 | 0.985 | 0.974 | 1.018 | -0.001 | 0.877 |
| 40 | pm2-pm6  | 1.014 | 1     | 1.109 | 1.027 | 0.003  | 0.907 |
| 41 | pm2-pm7  | 1.967 | 1.565 | 2.081 | 1.61  | -0.096 | 0.013 |
| 42 | pm2-pm8  | 0.98  | 0.991 | 0.986 | 1.015 | -0.002 | 0.72  |
| 43 | pm2-pm9  | 1.05  | 1.077 | 1.01  | 1.011 | 0.005  | 0.975 |
| 44 | pm2-pm10 | 2.281 | 1.887 | 2.153 | 2.303 | 0.139  | 0.009 |
| 45 | pm2-pm11 | 0.983 | 1.003 | 0.995 | 1.015 | -0.004 | 0.62  |
| 46 | pm2-pm12 | 1.119 | 1.157 | 1.041 | 1.176 | -0.058 | 0.04  |
| 47 | pm2-pm13 | 0.975 | 1.069 | 1.005 | 1.002 | 0.007  | 0.418 |
| 48 | pm2-pm14 | 0.964 | 1.034 | 1.026 | 0.982 | 0.001  | 0.923 |
| 49 | pm2-pm15 | 1.023 | 1.03  | 1.023 | 0.99  | 0.013  | 0.384 |
| 50 | pm2-pm16 | 1.03  | 1.026 | 1.001 | 1.02  | 0.021  | 0.266 |
| 51 | pm2-pm17 | 1.004 | 1.009 | 0.99  | 0.954 | -0.01  | 0.485 |
| 52 | pm2-pm18 | 0.978 | 1     | 0.987 | 1.009 | -0.003 | 0.853 |
| 53 | pm2-pm19 | 1.006 | 1.014 | 1.004 | 1.017 | 0.013  | 0.36  |
| 54 | pm2-pm20 | 0.993 | 1.035 | 0.994 | 0.985 | 0.002  | 0.717 |



|    |          |       |       |       |       |        |       |
|----|----------|-------|-------|-------|-------|--------|-------|
| 55 | pm2-pm21 | 1.097 | 1.275 | 1.378 | 1.013 | -0.068 | 0.024 |
| 56 | pm2-pm22 | 1.044 | 1.151 | 1.081 | 1.037 | 0.002  | 0.81  |
| 57 | pm2-pm23 | 1.06  | 1.228 | 1.109 | 1.06  | -0.005 | 0.534 |
| 58 | pm2-pm24 | 0.964 | 1.039 | 1.006 | 0.986 | -0.003 | 0.805 |
| 59 | pm2-pm25 | 0.978 | 0.976 | 0.986 | 0.992 | -0.014 | 0.368 |
| 60 | pm2-pm26 | 0.976 | 0.99  | 1.012 | 0.989 | -0.005 | 0.429 |
| 61 | pm2-pm27 | 1.025 | 1.015 | 1.045 | 1.015 | 0.006  | 0.505 |
| 62 | pm2-pm28 | 1.233 | 1.074 | 1.095 | 1.356 | -0.064 | 0.04  |
| 63 | pm2-pm29 | 1.033 | 1.237 | 1.009 | 1.048 | 0.007  | 0.501 |
| 64 | pm2-pm30 | 0.92  | 0.919 | 0.971 | 0.895 | 0.016  | 0.379 |
| 65 | pm2-pm31 | 1.01  | 1.029 | 1.016 | 0.994 | -0.009 | 0.481 |
| 66 | pm2-pm32 | 0.981 | 1.134 | 1.008 | 1.015 | -0.001 | 0.716 |
| 67 | pm2-pm33 | 1     | 0.995 | 0.993 | 1.007 | 0.001  | 0.604 |
| 68 | pm2-pm34 | 0.959 | 1.022 | 1.028 | 0.999 | 0      | 0.959 |
| 69 | pm2-pm35 | 0.996 | 1.012 | 0.993 | 1.001 | -0.002 | 0.71  |
| 70 | pm2-pm36 | 0.996 | 1     | 1.007 | 0.991 | 0.002  | 0.867 |
| 71 | pm2-pm37 | 0.982 | 1.01  | 1.001 | 1.003 | -0.001 | 0.963 |
| 72 | pm3-pm4  | 0.988 | 1.036 | 0.999 | 1.019 | -0.021 | 0.242 |
| 73 | pm3-pm5  | 0.991 | 1.021 | 1.017 | 1.039 | 0.013  | 0.37  |
| 74 | pm3-pm6  | 1.061 | 1.016 | 1.073 | 1.02  | 0.001  | 0.938 |
| 75 | pm3-pm7  | 1.943 | 1.587 | 2.099 | 1.612 | -0.099 | 0.016 |
| 76 | pm3-pm8  | 1.005 | 1.025 | 1.029 | 1.001 | 0.012  | 0.361 |
| 77 | pm3-pm9  | 1.035 | 1.024 | 1.061 | 1     | -0.01  | 0.352 |
| 78 | pm3-pm10 | 2.291 | 1.948 | 2.459 | 2.025 | 0.156  | 0.004 |
| 79 | pm3-pm11 | 1.01  | 1.01  | 1.024 | 0.996 | 0      | 0.663 |
| 80 | pm3-pm12 | 1.098 | 1.192 | 1.016 | 1.192 | -0.064 | 0.04  |
| 81 | pm3-pm13 | 0.995 | 1.05  | 0.993 | 0.967 | -0.012 | 0.32  |
| 82 | pm3-pm14 | 1.007 | 1.051 | 0.999 | 1.002 | 0.007  | 0.531 |
| 83 | pm3-pm15 | 0.993 | 1.035 | 0.982 | 1.013 | -0.006 | 0.403 |
| 84 | pm3-pm16 | 0.97  | 0.997 | 1.014 | 0.997 | -0.011 | 0.38  |

|     |          |       |       |       |       |        |       |
|-----|----------|-------|-------|-------|-------|--------|-------|
| 85  | pm3-pm17 | 0.98  | 0.99  | 1.014 | 0.977 | -0.017 | 0.353 |
| 86  | pm3-pm18 | 1.021 | 0.995 | 1.008 | 1.012 | 0.004  | 0.753 |
| 87  | pm3-pm19 | 0.982 | 1.019 | 1.015 | 1.008 | 0.001  | 0.645 |
| 88  | pm3-pm20 | 0.994 | 1.031 | 1.016 | 0.999 | 0.002  | 0.817 |
| 89  | pm3-pm21 | 1.124 | 1.287 | 1.337 | 1.005 | -0.078 | 0.016 |
| 90  | pm3-pm22 | 1.069 | 1.163 | 1.064 | 1.034 | -0.002 | 0.713 |
| 91  | pm3-pm23 | 1.073 | 1.221 | 1.146 | 1.054 | -0.004 | 0.641 |
| 92  | pm3-pm24 | 1.016 | 1.028 | 1.027 | 1.014 | 0.012  | 0.327 |
| 93  | pm3-pm25 | 0.998 | 1     | 1.014 | 0.997 | -0.003 | 0.92  |
| 94  | pm3-pm26 | 0.992 | 1.016 | 1.027 | 1.017 | 0.008  | 0.522 |
| 95  | pm3-pm27 | 1.008 | 1.04  | 1.038 | 1.031 | 0.003  | 0.67  |
| 96  | pm3-pm28 | 1.232 | 1.053 | 1.146 | 1.357 | -0.064 | 0.021 |
| 97  | pm3-pm29 | 0.995 | 1.194 | 1.001 | 1.041 | -0.025 | 0.239 |
| 98  | pm3-pm30 | 0.899 | 0.892 | 0.972 | 0.895 | -0.004 | 0.911 |
| 99  | pm3-pm31 | 1.018 | 1.055 | 1.04  | 1.01  | 0.002  | 0.716 |
| 100 | pm3-pm32 | 0.99  | 1.144 | 1.037 | 1.047 | 0.011  | 0.395 |
| 101 | pm3-pm33 | 1.008 | 1.008 | 1.026 | 1.016 | 0.009  | 0.594 |
| 102 | pm3-pm34 | 1.044 | 1.079 | 1     | 0.98  | 0.016  | 0.395 |
| 103 | pm3-pm35 | 1.015 | 1.023 | 1.022 | 0.988 | 0.002  | 0.67  |
| 104 | pm3-pm36 | 0.987 | 0.983 | 1.021 | 1.026 | -0.001 | 0.825 |
| 105 | pm3-pm37 | 1.026 | 0.984 | 1.015 | 1.031 | 0.007  | 0.523 |
| 106 | pm4-pm5  | 1.015 | 1.053 | 0.994 | 1.026 | -0.002 | 0.801 |
| 107 | pm4-pm6  | 0.986 | 1.012 | 1.076 | 0.986 | -0.047 | 0.152 |
| 108 | pm4-pm7  | 1.921 | 1.625 | 2.073 | 1.588 | -0.128 | 0.009 |
| 109 | pm4-pm8  | 1.022 | 1.04  | 1     | 0.987 | -0.011 | 0.347 |
| 110 | pm4-pm9  | 1.027 | 1.108 | 1.056 | 1.04  | -0.002 | 0.771 |
| 111 | pm4-pm10 | 2.095 | 1.882 | 2.002 | 2.149 | -0.013 | 0.34  |
| 112 | pm4-pm11 | 1.02  | 1.05  | 1.019 | 0.999 | -0.009 | 0.452 |
| 113 | pm4-pm12 | 1.128 | 1.233 | 1.066 | 1.205 | -0.051 | 0.03  |
| 114 | pm4-pm13 | 0.983 | 1.053 | 1.024 | 0.97  | -0.026 | 0.286 |

|     |          |       |       |       |       |        |       |
|-----|----------|-------|-------|-------|-------|--------|-------|
| 115 | pm4-pm14 | 1.009 | 1.062 | 1.031 | 0.997 | -0.003 | 0.815 |
| 116 | pm4-pm15 | 1.008 | 1.077 | 1.041 | 0.979 | -0.005 | 0.86  |
| 117 | pm4-pm16 | 1.018 | 1.089 | 1.004 | 0.963 | -0.007 | 0.545 |
| 118 | pm4-pm17 | 1.016 | 1.082 | 1.016 | 0.996 | 0      | 0.675 |
| 119 | pm4-pm18 | 1.014 | 1.021 | 1.01  | 0.974 | -0.02  | 0.213 |
| 120 | pm4-pm19 | 1.021 | 1.022 | 1.014 | 1.004 | -0.01  | 0.589 |
| 121 | pm4-pm20 | 1.021 | 1.075 | 1.005 | 1.002 | -0.002 | 0.798 |
| 122 | pm4-pm21 | 1.144 | 1.294 | 1.429 | 1.004 | -0.069 | 0.045 |
| 123 | pm4-pm22 | 1.066 | 1.243 | 1.16  | 1.058 | 0.027  | 0.25  |
| 124 | pm4-pm23 | 1.132 | 1.404 | 1.125 | 1.065 | 0.034  | 0.23  |
| 125 | pm4-pm24 | 1.014 | 1.049 | 1.04  | 0.999 | -0.004 | 0.986 |
| 126 | pm4-pm25 | 1.005 | 1.06  | 0.995 | 1.01  | -0.008 | 0.494 |
| 127 | pm4-pm26 | 1.028 | 1.072 | 0.994 | 0.976 | -0.008 | 0.403 |
| 128 | pm4-pm27 | 1.025 | 1.053 | 1.026 | 1.024 | -0.015 | 0.339 |
| 129 | pm4-pm28 | 1.235 | 1.16  | 1.17  | 1.334 | -0.056 | 0.022 |
| 130 | pm4-pm29 | 1.04  | 1.314 | 0.993 | 1.108 | 0.011  | 0.395 |
| 131 | pm4-pm30 | 0.931 | 0.97  | 0.972 | 0.881 | 0      | 0.838 |
| 132 | pm4-pm31 | 0.99  | 1.073 | 1.045 | 1.042 | -0.011 | 0.305 |
| 133 | pm4-pm32 | 0.993 | 1.145 | 1.025 | 1.007 | -0.021 | 0.258 |
| 134 | pm4-pm33 | 1.01  | 1.054 | 1.024 | 1.015 | 0      | 0.998 |
| 135 | pm4-pm34 | 0.976 | 1.121 | 1.055 | 0.998 | 0.008  | 0.474 |
| 136 | pm4-pm35 | 0.994 | 1.077 | 0.983 | 0.978 | -0.023 | 0.213 |
| 137 | pm4-pm36 | 1.016 | 1.053 | 1.02  | 1.03  | 0.005  | 0.852 |
| 138 | pm4-pm37 | 1.022 | 1.062 | 1.01  | 1.013 | -0.001 | 0.647 |
| 139 | pm5-pm6  | 1.053 | 0.963 | 1.108 | 0.989 | -0.006 | 0.437 |
| 140 | pm5-pm7  | 1.968 | 1.591 | 2.08  | 1.585 | -0.096 | 0.013 |
| 141 | pm5-pm8  | 0.982 | 1.011 | 1.007 | 0.97  | -0.003 | 0.882 |
| 142 | pm5-pm9  | 0.996 | 1.026 | 1.023 | 1.038 | -0.012 | 0.382 |
| 143 | pm5-pm10 | 2.128 | 1.711 | 1.973 | 2.205 | -0.013 | 0.339 |
| 144 | pm5-pm11 | 1.016 | 0.975 | 1.002 | 0.989 | -0.007 | 0.409 |

|     |          |       |       |       |       |        |       |
|-----|----------|-------|-------|-------|-------|--------|-------|
| 145 | pm5-pm12 | 1.125 | 1.174 | 1.016 | 1.218 | -0.048 | 0.171 |
| 146 | pm5-pm13 | 0.977 | 0.989 | 0.972 | 0.97  | -0.029 | 0.202 |
| 147 | pm5-pm14 | 1.019 | 1.024 | 1.026 | 0.993 | 0.015  | 0.333 |
| 148 | pm5-pm15 | 0.987 | 1.003 | 1.004 | 1.018 | -0.001 | 0.965 |
| 149 | pm5-pm16 | 1.013 | 0.998 | 1.016 | 0.976 | 0.003  | 0.792 |
| 150 | pm5-pm17 | 1.015 | 0.988 | 1.002 | 0.978 | -0.003 | 0.75  |
| 151 | pm5-pm18 | 0.998 | 0.985 | 0.994 | 0.986 | -0.006 | 0.406 |
| 152 | pm5-pm19 | 0.986 | 1.003 | 1.007 | 1.024 | 0.007  | 0.448 |
| 153 | pm5-pm20 | 0.983 | 0.973 | 0.983 | 0.99  | -0.018 | 0.383 |
| 154 | pm5-pm21 | 1.113 | 1.277 | 1.361 | 1.025 | -0.065 | 0.038 |
| 155 | pm5-pm22 | 1.083 | 1.136 | 1.069 | 1.009 | -0.002 | 0.677 |
| 156 | pm5-pm23 | 1.086 | 1.208 | 1.106 | 1.043 | -0.009 | 0.426 |
| 157 | pm5-pm24 | 0.999 | 0.993 | 0.988 | 0.995 | -0.008 | 0.597 |
| 158 | pm5-pm25 | 1.008 | 0.963 | 0.991 | 0.986 | -0.011 | 0.342 |
| 159 | pm5-pm26 | 1.011 | 0.981 | 1.016 | 0.993 | 0.003  | 0.989 |
| 160 | pm5-pm27 | 0.995 | 0.996 | 1.042 | 1.012 | -0.008 | 0.583 |
| 161 | pm5-pm28 | 1.211 | 1.031 | 1.141 | 1.375 | -0.064 | 0.037 |
| 162 | pm5-pm29 | 0.99  | 1.147 | 0.953 | 1.102 | -0.027 | 0.218 |
| 163 | pm5-pm30 | 0.909 | 0.888 | 0.983 | 0.864 | 0      | 0.92  |
| 164 | pm5-pm31 | 1.021 | 1.03  | 1.056 | 1.038 | 0.015  | 0.302 |
| 165 | pm5-pm32 | 1.001 | 1.145 | 1.02  | 1.022 | 0.011  | 0.314 |
| 166 | pm5-pm33 | 1.014 | 0.964 | 1.009 | 0.995 | -0.003 | 0.61  |
| 167 | pm5-pm34 | 1.024 | 1.025 | 1.026 | 1.005 | 0.018  | 0.378 |
| 168 | pm5-pm35 | 0.989 | 0.992 | 1.016 | 1.004 | -0.003 | 0.624 |
| 169 | pm5-pm36 | 0.998 | 1.02  | 1.004 | 1.022 | 0.014  | 0.308 |
| 170 | pm5-pm37 | 1.004 | 1.02  | 0.986 | 0.994 | 0.001  | 0.731 |
| 171 | pm6-pm7  | 1.996 | 1.567 | 2.252 | 1.633 | -0.078 | 0.018 |
| 172 | pm6-pm8  | 1.048 | 1.02  | 1.092 | 1.017 | 0.01   | 0.328 |
| 173 | pm6-pm9  | 1.039 | 1.03  | 1.146 | 1.011 | -0.014 | 0.356 |
| 174 | pm6-pm10 | 2.271 | 1.961 | 2.317 | 2.353 | 0.17   | 0.005 |

|     |          |       |       |       |       |        |        |
|-----|----------|-------|-------|-------|-------|--------|--------|
| 175 | pm6-pm11 | 1.041 | 1.013 | 1.104 | 1.045 | 0.009  | 0.441  |
| 176 | pm6-pm12 | 1.141 | 1.179 | 1.126 | 1.241 | -0.048 | 0.158  |
| 177 | pm6-pm13 | 1.006 | 1.035 | 1.087 | 1.012 | -0.009 | 0.47   |
| 178 | pm6-pm14 | 1.045 | 1.079 | 1.11  | 1.027 | 0.027  | 0.27   |
| 179 | pm6-pm15 | 1.031 | 0.994 | 1.109 | 1.029 | -0.001 | 0.717  |
| 180 | pm6-pm16 | 1.022 | 1.03  | 1.105 | 1.022 | 0.008  | 0.533  |
| 181 | pm6-pm17 | 1.04  | 1.014 | 1.098 | 0.999 | 0.001  | 0.994  |
| 182 | pm6-pm18 | 1.026 | 1.014 | 1.116 | 1.009 | 0.006  | 0.557  |
| 183 | pm6-pm19 | 1.014 | 1.036 | 1.09  | 1.046 | 0.011  | 0.331  |
| 184 | pm6-pm20 | 1.04  | 1.024 | 1.13  | 0.997 | 0.01   | 0.461  |
| 185 | pm6-pm21 | 1.107 | 1.318 | 1.532 | 1.042 | -0.047 | 0.17   |
| 186 | pm6-pm22 | 1.086 | 1.139 | 1.155 | 1.027 | -0.013 | 0.37   |
| 187 | pm6-pm23 | 1.084 | 1.238 | 1.235 | 1.054 | -0.005 | 0.414  |
| 188 | pm6-pm24 | 1.023 | 1.035 | 1.101 | 1.019 | 0.005  | 0.811  |
| 189 | pm6-pm25 | 1.044 | 1.004 | 1.1   | 1.012 | 0.004  | 0.979  |
| 190 | pm6-pm26 | 1.026 | 0.99  | 1.082 | 1.02  | -0.006 | 0.498  |
| 191 | pm6-pm27 | 1.048 | 1.06  | 1.139 | 1.016 | 0.008  | 0.548  |
| 192 | pm6-pm28 | 1.293 | 1.1   | 1.217 | 1.31  | -0.061 | 0.042  |
| 193 | pm6-pm29 | 1.033 | 1.15  | 1.103 | 1.12  | -0.012 | 0.343  |
| 194 | pm6-pm30 | 0.92  | 0.947 | 1.064 | 0.914 | 0.012  | 0.331  |
| 195 | pm6-pm31 | 1.059 | 1.054 | 1.084 | 1.03  | -0.003 | 0.968  |
| 196 | pm6-pm32 | 1.039 | 1.159 | 1.108 | 1.052 | 0.015  | 0.361  |
| 197 | pm6-pm33 | 1.061 | 1.004 | 1.121 | 1.017 | 0.015  | 0.368  |
| 198 | pm6-pm34 | 1.045 | 1.007 | 1.111 | 0.988 | -0.002 | 0.933  |
| 199 | pm6-pm35 | 1.003 | 1.016 | 1.102 | 1.009 | -0.009 | 0.555  |
| 200 | pm6-pm36 | 1.048 | 1.015 | 1.082 | 1.018 | 0.006  | 0.551  |
| 201 | pm6-pm37 | 1.036 | 1.016 | 1.1   | 1.036 | 0.009  | 0.529  |
| 202 | pm7-pm8  | 1.991 | 1.622 | 2.083 | 1.613 | -0.074 | 0.017  |
| 203 | pm7-pm9  | 2.022 | 1.568 | 2.121 | 1.65  | -0.098 | 0.014  |
| 204 | pm7-pm10 | 4.003 | 2.584 | 3.865 | 3.347 | 0.527  | <0.001 |

|     |          |       |       |       |       |        |       |
|-----|----------|-------|-------|-------|-------|--------|-------|
| 205 | pm7-pm11 | 1.919 | 1.627 | 2.097 | 1.656 | -0.084 | 0.011 |
| 206 | pm7-pm12 | 2.142 | 1.777 | 2.156 | 1.945 | -0.082 | 0.018 |
| 207 | pm7-pm13 | 1.928 | 1.578 | 2.067 | 1.581 | -0.124 | 0.008 |
| 208 | pm7-pm14 | 2.014 | 1.541 | 2.132 | 1.578 | -0.09  | 0.015 |
| 209 | pm7-pm15 | 1.952 | 1.607 | 2.067 | 1.584 | -0.107 | 0.01  |
| 210 | pm7-pm16 | 1.975 | 1.586 | 2.083 | 1.595 | -0.094 | 0.017 |
| 211 | pm7-pm17 | 2.018 | 1.536 | 2.117 | 1.625 | -0.081 | 0.013 |
| 212 | pm7-pm18 | 1.948 | 1.515 | 2.021 | 1.554 | -0.143 | 0.008 |
| 213 | pm7-pm19 | 1.947 | 1.51  | 2.107 | 1.587 | -0.116 | 0.006 |
| 214 | pm7-pm20 | 2.004 | 1.584 | 2.069 | 1.584 | -0.096 | 0.011 |
| 215 | pm7-pm21 | 2.153 | 1.921 | 2.781 | 1.63  | -0.043 | 0.197 |
| 216 | pm7-pm22 | 2.1   | 1.701 | 2.243 | 1.663 | -0.056 | 0.023 |
| 217 | pm7-pm23 | 2.042 | 1.813 | 2.22  | 1.677 | -0.088 | 0.02  |
| 218 | pm7-pm24 | 1.966 | 1.601 | 2.12  | 1.574 | -0.092 | 0.016 |
| 219 | pm7-pm25 | 1.974 | 1.529 | 2.12  | 1.59  | -0.1   | 0.01  |
| 220 | pm7-pm26 | 1.992 | 1.594 | 2.098 | 1.6   | -0.083 | 0.019 |
| 221 | pm7-pm27 | 1.983 | 1.562 | 2.125 | 1.628 | -0.101 | 0.007 |
| 222 | pm7-pm28 | 2.464 | 1.624 | 2.308 | 2.199 | -0.011 | 0.387 |
| 223 | pm7-pm29 | 2.08  | 1.834 | 2.031 | 1.686 | -0.073 | 0.01  |
| 224 | pm7-pm30 | 2.082 | 1.728 | 2.372 | 1.448 | 0.091  | 0.012 |
| 225 | pm7-pm31 | 1.994 | 1.703 | 2.127 | 1.622 | -0.066 | 0.042 |
| 226 | pm7-pm32 | 1.934 | 1.597 | 2.054 | 1.636 | -0.136 | 0.009 |
| 227 | pm7-pm33 | 1.961 | 1.551 | 2.094 | 1.593 | -0.105 | 0.006 |
| 228 | pm7-pm34 | 1.957 | 1.576 | 2.068 | 1.62  | -0.103 | 0.008 |
| 229 | pm7-pm35 | 1.985 | 1.532 | 2.08  | 1.585 | -0.114 | 0.006 |
| 230 | pm7-pm36 | 1.959 | 1.534 | 2.077 | 1.583 | -0.114 | 0.005 |
| 231 | pm7-pm37 | 1.955 | 1.544 | 2.103 | 1.584 | -0.109 | 0.009 |
| 232 | pm8-pm9  | 1.012 | 1.069 | 1.036 | 1.023 | 0.003  | 0.647 |
| 233 | pm8-pm10 | 2.273 | 1.981 | 2.143 | 2.024 | 0.089  | 0.014 |
| 234 | pm8-pm11 | 1.018 | 0.997 | 0.994 | 1.012 | 0.003  | 0.889 |

|     |          |       |       |       |       |        |       |
|-----|----------|-------|-------|-------|-------|--------|-------|
| 235 | pm8-pm12 | 1.078 | 1.149 | 1.034 | 1.185 | -0.069 | 0.024 |
| 236 | pm8-pm13 | 0.98  | 1.018 | 0.992 | 0.951 | -0.02  | 0.394 |
| 237 | pm8-pm14 | 0.995 | 1.065 | 0.986 | 0.987 | 0.008  | 0.458 |
| 238 | pm8-pm15 | 1.023 | 0.983 | 1.012 | 1.017 | 0.006  | 0.493 |
| 239 | pm8-pm16 | 0.99  | 1.036 | 1.005 | 0.989 | 0.008  | 0.4   |
| 240 | pm8-pm17 | 0.99  | 0.994 | 0.996 | 0.995 | -0.004 | 0.664 |
| 241 | pm8-pm18 | 1.004 | 0.982 | 0.985 | 1.01  | -0.001 | 0.997 |
| 242 | pm8-pm19 | 1.004 | 0.973 | 0.995 | 0.99  | -0.006 | 0.501 |
| 243 | pm8-pm20 | 0.982 | 1.018 | 1.003 | 0.998 | 0.001  | 0.823 |
| 244 | pm8-pm21 | 1.118 | 1.284 | 1.377 | 1.004 | -0.062 | 0.023 |
| 245 | pm8-pm22 | 1.096 | 1.138 | 1.09  | 1.009 | 0.007  | 0.458 |
| 246 | pm8-pm23 | 1.054 | 1.265 | 1.094 | 1.053 | -0.003 | 0.922 |
| 247 | pm8-pm24 | 0.966 | 0.992 | 1.01  | 0.995 | -0.01  | 0.335 |
| 248 | pm8-pm25 | 1.005 | 0.992 | 1.001 | 0.98  | -0.002 | 0.915 |
| 249 | pm8-pm26 | 0.999 | 1.011 | 1.004 | 1.001 | 0.007  | 0.428 |
| 250 | pm8-pm27 | 1.007 | 1.012 | 1.037 | 0.995 | -0.006 | 0.45  |
| 251 | pm8-pm28 | 1.221 | 1.072 | 1.112 | 1.338 | -0.067 | 0.031 |
| 252 | pm8-pm29 | 1.038 | 1.172 | 0.996 | 1.106 | 0.004  | 0.977 |
| 253 | pm8-pm30 | 0.948 | 0.895 | 0.947 | 0.923 | 0.018  | 0.351 |
| 254 | pm8-pm31 | 1.01  | 1.034 | 1.046 | 1.015 | 0.006  | 0.412 |
| 255 | pm8-pm32 | 1.01  | 1.125 | 1.013 | 1.023 | 0.008  | 0.563 |
| 256 | pm8-pm33 | 0.997 | 0.992 | 0.976 | 1.018 | -0.001 | 0.983 |
| 257 | pm8-pm34 | 0.991 | 1.03  | 1.017 | 0.995 | 0.007  | 0.596 |
| 258 | pm8-pm35 | 0.998 | 1.058 | 0.974 | 1.012 | 0.008  | 0.548 |
| 259 | pm8-pm36 | 0.994 | 1.013 | 0.99  | 0.969 | -0.005 | 0.722 |
| 260 | pm8-pm37 | 1.012 | 0.994 | 0.994 | 0.993 | -0.001 | 0.844 |
| 261 | pm9-pm10 | 2.297 | 2.032 | 2.213 | 2.069 | 0.1    | 0.016 |
| 262 | pm9-pm11 | 1.012 | 1.023 | 1.028 | 1.023 | -0.018 | 0.364 |
| 263 | pm9-pm12 | 1.174 | 1.159 | 1.064 | 1.273 | -0.05  | 0.175 |
| 264 | pm9-pm13 | 1.014 | 1.038 | 1.031 | 0.998 | -0.022 | 0.272 |

|     |           |       |       |       |       |        |       |
|-----|-----------|-------|-------|-------|-------|--------|-------|
| 265 | pm9-pm14  | 1.043 | 1.076 | 1.062 | 1.022 | 0.014  | 0.319 |
| 266 | pm9-pm15  | 1.023 | 1.046 | 1.078 | 1.009 | -0.001 | 0.841 |
| 267 | pm9-pm16  | 1.069 | 1.056 | 1.012 | 1.042 | 0.01   | 0.34  |
| 268 | pm9-pm17  | 1.022 | 1.054 | 1.066 | 1.018 | 0.005  | 0.978 |
| 269 | pm9-pm18  | 1.031 | 0.996 | 1.026 | 1.024 | -0.014 | 0.395 |
| 270 | pm9-pm19  | 1.013 | 1.031 | 1.008 | 1.045 | -0.009 | 0.422 |
| 271 | pm9-pm20  | 1.007 | 1.023 | 1.055 | 1.051 | -0.002 | 0.888 |
| 272 | pm9-pm21  | 1.141 | 1.328 | 1.424 | 1.053 | -0.058 | 0.027 |
| 273 | pm9-pm22  | 1.121 | 1.221 | 1.125 | 1.028 | 0.011  | 0.312 |
| 274 | pm9-pm23  | 1.104 | 1.288 | 1.142 | 1.066 | -0.006 | 0.588 |
| 275 | pm9-pm24  | 1.053 | 1.071 | 1.021 | 1.01  | 0.001  | 0.725 |
| 276 | pm9-pm25  | 1.051 | 1.034 | 1.022 | 1.018 | -0.003 | 0.705 |
| 277 | pm9-pm26  | 1.008 | 1.055 | 1.029 | 1.041 | 0      | 0.813 |
| 278 | pm9-pm27  | 1.02  | 1.057 | 1.053 | 1.019 | -0.018 | 0.305 |
| 279 | pm9-pm28  | 1.274 | 1.122 | 1.144 | 1.382 | -0.059 | 0.029 |
| 280 | pm9-pm29  | 1.038 | 1.17  | 1.014 | 1.083 | -0.035 | 0.234 |
| 281 | pm9-pm30  | 0.955 | 0.931 | 0.999 | 0.892 | -0.003 | 0.723 |
| 282 | pm9-pm31  | 1.04  | 1.121 | 1.08  | 1.025 | 0.009  | 0.494 |
| 283 | pm9-pm32  | 1.027 | 1.163 | 1.025 | 1.063 | -0.002 | 0.947 |
| 284 | pm9-pm33  | 1.026 | 1.075 | 1.04  | 1.021 | 0.007  | 0.576 |
| 285 | pm9-pm34  | 1.06  | 1.077 | 1.02  | 1.019 | 0.006  | 0.47  |
| 286 | pm9-pm35  | 1.045 | 1.071 | 1.044 | 0.992 | -0.001 | 0.732 |
| 287 | pm9-pm36  | 1.039 | 1.04  | 1.035 | 1.02  | 0.001  | 0.925 |
| 288 | pm9-pm37  | 1.01  | 1.067 | 1.023 | 1.031 | -0.003 | 0.666 |
| 289 | pm10-pm11 | 2.315 | 1.934 | 2.162 | 2.112 | 0.107  | 0.007 |
| 290 | pm10-pm12 | 2.2   | 1.968 | 1.937 | 2.464 | -0.06  | 0.02  |
| 291 | pm10-pm13 | 2.293 | 2.014 | 2.133 | 2.04  | 0.093  | 0.013 |
| 292 | pm10-pm14 | 2.243 | 1.852 | 2.046 | 2.221 | 0.069  | 0.03  |
| 293 | pm10-pm15 | 2.108 | 1.905 | 2.100 | 2.246 | 0.065  | 0.040 |
| 294 | pm10-pm16 | 2.022 | 1.781 | 1.859 | 2.023 | -0.098 | 0.012 |



|     |           |       |       |       |       |        |       |
|-----|-----------|-------|-------|-------|-------|--------|-------|
| 295 | pm10-pm17 | 2.298 | 1.953 | 2.101 | 2.045 | 0.079  | 0.011 |
| 296 | pm10-pm18 | 2.012 | 1.724 | 1.899 | 2.087 | -0.087 | 0.014 |
| 297 | pm10-pm19 | 2.151 | 1.914 | 2.082 | 2.266 | 0.085  | 0.011 |
| 298 | pm10-pm20 | 2.323 | 1.993 | 2.175 | 2.055 | 0.115  | 0.005 |
| 299 | pm10-pm21 | 2.201 | 2.144 | 2.567 | 2.067 | -0.035 | 0.261 |
| 300 | pm10-pm22 | 2.065 | 1.889 | 1.939 | 2.106 | -0.098 | 0.019 |
| 301 | pm10-pm23 | 2.127 | 1.941 | 2.043 | 2.117 | -0.084 | 0.014 |
| 302 | pm10-pm24 | 2.077 | 1.823 | 1.986 | 2.122 | -0.021 | 0.26  |
| 303 | pm10-pm25 | 2.119 | 1.741 | 2.001 | 2.133 | -0.02  | 0.287 |
| 304 | pm10-pm26 | 2.307 | 1.922 | 2.186 | 2.078 | 0.105  | 0.008 |
| 305 | pm10-pm27 | 2.057 | 1.745 | 1.891 | 2.093 | -0.094 | 0.016 |
| 306 | pm10-pm28 | 2.399 | 1.709 | 2.073 | 2.727 | -0.047 | 0.162 |
| 307 | pm10-pm29 | 2.008 | 1.935 | 1.889 | 2.209 | -0.085 | 0.016 |
| 308 | pm10-pm30 | 2.115 | 1.846 | 2.079 | 2.062 | 0.094  | 0.018 |
| 309 | pm10-pm31 | 2.046 | 1.724 | 1.889 | 2.11  | -0.1   | 0.013 |
| 310 | pm10-pm32 | 2.187 | 1.947 | 2.077 | 2.333 | 0.08   | 0.02  |
| 311 | pm10-pm33 | 2.265 | 1.941 | 2.167 | 2     | 0.074  | 0.015 |
| 312 | pm10-pm34 | 2.29  | 2.01  | 2.134 | 2.042 | 0.096  | 0.011 |
| 313 | pm10-pm35 | 2.304 | 1.974 | 2.12  | 2.038 | 0.085  | 0.016 |
| 314 | pm10-pm36 | 2.258 | 2.018 | 2.144 | 2.043 | 0.098  | 0.012 |
| 315 | pm10-pm37 | 2.294 | 1.979 | 2.161 | 1.995 | 0.086  | 0.019 |
| 316 | pm11-pm12 | 1.103 | 1.176 | 1.028 | 1.284 | -0.04  | 0.188 |
| 317 | pm11-pm13 | 0.99  | 1.039 | 1.013 | 0.985 | -0.006 | 0.564 |
| 318 | pm11-pm14 | 1.045 | 1.056 | 1.008 | 1.003 | 0.021  | 0.274 |
| 319 | pm11-pm15 | 1.02  | 1.042 | 1.001 | 1.023 | 0.011  | 0.304 |
| 320 | pm11-pm16 | 1.004 | 1.068 | 1.023 | 1.032 | 0.027  | 0.214 |
| 321 | pm11-pm17 | 0.963 | 0.987 | 1.004 | 0.959 | -0.028 | 0.285 |
| 322 | pm11-pm18 | 0.982 | 0.968 | 0.999 | 1.018 | -0.012 | 0.346 |
| 323 | pm11-pm19 | 0.984 | 1.001 | 1.007 | 0.983 | -0.01  | 0.389 |
| 324 | pm11-pm20 | 0.998 | 1.029 | 0.996 | 0.995 | -0.002 | 0.653 |

|     |           |       |       |       |       |        |       |
|-----|-----------|-------|-------|-------|-------|--------|-------|
| 325 | pm11-pm21 | 1.116 | 1.274 | 1.339 | 1.033 | -0.075 | 0.019 |
| 326 | pm11-pm22 | 1.045 | 1.191 | 1.072 | 1.04  | 0.003  | 0.824 |
| 327 | pm11-pm23 | 1.066 | 1.242 | 1.115 | 1.09  | 0.002  | 0.985 |
| 328 | pm11-pm24 | 0.997 | 1.045 | 1.007 | 0.99  | 0.001  | 0.731 |
| 329 | pm11-pm25 | 0.992 | 1.028 | 1.003 | 1.015 | 0.005  | 0.592 |
| 330 | pm11-pm26 | 0.966 | 1     | 0.991 | 1.009 | -0.013 | 0.304 |
| 331 | pm11-pm27 | 1.011 | 1.052 | 1.03  | 1.014 | 0.001  | 0.821 |
| 332 | pm11-pm28 | 1.248 | 1.057 | 1.11  | 1.367 | -0.065 | 0.042 |
| 333 | pm11-pm29 | 0.997 | 1.196 | 0.976 | 1.065 | -0.023 | 0.245 |
| 334 | pm11-pm30 | 0.942 | 0.879 | 0.96  | 0.928 | 0.009  | 0.57  |
| 335 | pm11-pm31 | 1.043 | 1.028 | 1.014 | 1.037 | 0.002  | 0.934 |
| 336 | pm11-pm32 | 1.003 | 1.114 | 1.014 | 1.059 | 0.005  | 0.525 |
| 337 | pm11-pm33 | 1.018 | 1.005 | 0.998 | 1.006 | 0.002  | 0.916 |
| 338 | pm11-pm34 | 0.997 | 1.064 | 0.992 | 1     | 0.005  | 0.818 |
| 339 | pm11-pm35 | 0.975 | 1.015 | 1.014 | 0.989 | -0.011 | 0.309 |
| 340 | pm11-pm36 | 1.005 | 0.975 | 1.004 | 1.005 | -0.007 | 0.525 |
| 341 | pm11-pm37 | 1.008 | 0.978 | 0.985 | 1.039 | -0.005 | 0.71  |
| 342 | pm12-pm13 | 1.081 | 1.177 | 0.997 | 1.25  | -0.065 | 0.022 |
| 343 | pm12-pm14 | 1.068 | 1.2   | 1.056 | 1.209 | -0.052 | 0.032 |
| 344 | pm12-pm15 | 1.115 | 1.135 | 1.031 | 1.274 | -0.05  | 0.175 |
| 345 | pm12-pm16 | 1.113 | 1.201 | 1.05  | 1.256 | -0.028 | 0.287 |
| 346 | pm12-pm17 | 1.083 | 1.229 | 1.019 | 1.209 | -0.049 | 0.161 |
| 347 | pm12-pm18 | 1.1   | 1.193 | 1.019 | 1.217 | -0.05  | 0.188 |
| 348 | pm12-pm19 | 1.078 | 1.164 | 1.015 | 1.214 | -0.064 | 0.024 |
| 349 | pm12-pm20 | 1.12  | 1.134 | 1.018 | 1.211 | -0.064 | 0.032 |
| 350 | pm12-pm21 | 1.267 | 1.538 | 1.424 | 1.262 | -0.071 | 0.018 |
| 351 | pm12-pm22 | 1.156 | 1.347 | 1.128 | 1.259 | -0.039 | 0.204 |
| 352 | pm12-pm23 | 1.203 | 1.423 | 1.147 | 1.296 | -0.038 | 0.295 |
| 353 | pm12-pm24 | 1.073 | 1.161 | 1.047 | 1.222 | -0.061 | 0.023 |
| 354 | pm12-pm25 | 1.086 | 1.179 | 1.056 | 1.225 | -0.046 | 0.156 |

|     |           |       |       |       |       |        |       |
|-----|-----------|-------|-------|-------|-------|--------|-------|
| 355 | pm12-pm26 | 1.107 | 1.153 | 1.047 | 1.217 | -0.052 | 0.04  |
| 356 | pm12-pm27 | 1.112 | 1.18  | 1.058 | 1.252 | -0.054 | 0.027 |
| 357 | pm12-pm28 | 1.37  | 1.226 | 1.162 | 1.627 | -0.092 | 0.019 |
| 358 | pm12-pm29 | 1.131 | 1.428 | 1.076 | 1.303 | -0.026 | 0.271 |
| 359 | pm12-pm30 | 1.062 | 1.043 | 0.939 | 1.139 | -0.05  | 0.036 |
| 360 | pm12-pm31 | 1.135 | 1.218 | 1.062 | 1.241 | -0.042 | 0.175 |
| 361 | pm12-pm32 | 1.114 | 1.311 | 1.005 | 1.279 | -0.043 | 0.197 |
| 362 | pm12-pm33 | 1.098 | 1.13  | 1.029 | 1.2   | -0.069 | 0.025 |
| 363 | pm12-pm34 | 1.122 | 1.204 | 1.058 | 1.173 | -0.048 | 0.174 |
| 364 | pm12-pm35 | 1.097 | 1.213 | 1.032 | 1.193 | -0.055 | 0.035 |
| 365 | pm12-pm36 | 1.107 | 1.175 | 1.027 | 1.206 | -0.053 | 0.039 |
| 366 | pm12-pm37 | 1.093 | 1.175 | 1.022 | 1.224 | -0.056 | 0.023 |
| 367 | pm13-pm14 | 0.991 | 1.019 | 1.007 | 1.008 | -0.004 | 0.953 |
| 368 | pm13-pm15 | 1.01  | 0.982 | 0.999 | 0.977 | -0.021 | 0.203 |
| 369 | pm13-pm16 | 0.981 | 0.993 | 1.028 | 1.006 | -0.006 | 0.476 |
| 370 | pm13-pm17 | 0.968 | 0.998 | 1.002 | 0.972 | -0.024 | 0.238 |
| 371 | pm13-pm18 | 1.017 | 1.037 | 0.967 | 0.984 | -0.005 | 0.467 |
| 372 | pm13-pm19 | 0.996 | 1.037 | 1     | 0.952 | -0.011 | 0.355 |
| 373 | pm13-pm20 | 0.991 | 1.026 | 1.009 | 1.022 | 0.002  | 0.935 |
| 374 | pm13-pm21 | 1.078 | 1.317 | 1.386 | 1.001 | -0.073 | 0.018 |
| 375 | pm13-pm22 | 1.035 | 1.157 | 1.07  | 0.997 | -0.022 | 0.284 |
| 376 | pm13-pm23 | 1.071 | 1.23  | 1.132 | 1.042 | -0.011 | 0.393 |
| 377 | pm13-pm24 | 0.973 | 1.035 | 0.989 | 0.988 | -0.015 | 0.365 |
| 378 | pm13-pm25 | 0.957 | 1.037 | 1.001 | 1.016 | -0.005 | 0.686 |
| 379 | pm13-pm26 | 0.987 | 1.037 | 0.996 | 0.966 | -0.011 | 0.334 |
| 380 | pm13-pm27 | 0.97  | 1.076 | 1.009 | 1.014 | -0.012 | 0.365 |
| 381 | pm13-pm28 | 1.241 | 1.118 | 1.157 | 1.358 | -0.045 | 0.196 |
| 382 | pm13-pm29 | 0.989 | 1.131 | 0.97  | 1.053 | -0.049 | 0.157 |
| 383 | pm13-pm30 | 0.903 | 0.877 | 0.924 | 0.894 | -0.021 | 0.226 |
| 384 | pm13-pm31 | 1.017 | 1.044 | 1.032 | 1.015 | -0.004 | 0.946 |

|     |           |       |       |       |       |        |       |
|-----|-----------|-------|-------|-------|-------|--------|-------|
| 385 | pm13-pm32 | 0.975 | 1.14  | 1.012 | 1.02  | -0.008 | 0.583 |
| 386 | pm13-pm33 | 1.03  | 1.046 | 1     | 1.008 | 0.013  | 0.34  |
| 387 | pm13-pm34 | 0.989 | 1.027 | 0.985 | 0.989 | -0.014 | 0.338 |
| 388 | pm13-pm35 | 0.943 | 1.04  | 0.989 | 0.944 | -0.034 | 0.272 |
| 389 | pm13-pm36 | 0.999 | 1.035 | 0.993 | 0.985 | -0.004 | 0.889 |
| 390 | pm13-pm37 | 0.991 | 1.059 | 1     | 0.979 | -0.003 | 0.975 |
| 391 | pm14-pm15 | 1.022 | 0.979 | 1     | 0.954 | -0.019 | 0.392 |
| 392 | pm14-pm16 | 0.987 | 0.998 | 0.999 | 0.975 | -0.013 | 0.356 |
| 393 | pm14-pm17 | 1.002 | 0.998 | 0.987 | 0.937 | -0.022 | 0.212 |
| 394 | pm14-pm18 | 1.014 | 1.06  | 1.032 | 0.992 | 0.023  | 0.296 |
| 395 | pm14-pm19 | 1.01  | 1.028 | 1.018 | 0.975 | 0.006  | 0.468 |
| 396 | pm14-pm20 | 0.994 | 1.036 | 1.009 | 0.979 | 0      | 0.681 |
| 397 | pm14-pm21 | 1.086 | 1.315 | 1.398 | 1.03  | -0.055 | 0.026 |
| 398 | pm14-pm22 | 1.069 | 1.128 | 1.109 | 0.999 | -0.005 | 0.838 |
| 399 | pm14-pm23 | 1.075 | 1.176 | 1.093 | 1.019 | -0.034 | 0.221 |
| 400 | pm14-pm24 | 0.98  | 1.019 | 0.995 | 1     | -0.007 | 0.512 |
| 401 | pm14-pm25 | 1.021 | 1.027 | 0.995 | 0.998 | 0.008  | 0.585 |
| 402 | pm14-pm26 | 1.011 | 1.007 | 1.023 | 1.011 | 0.011  | 0.353 |
| 403 | pm14-pm27 | 1.034 | 1.025 | 1.044 | 1.018 | 0.007  | 0.439 |
| 404 | pm14-pm28 | 1.257 | 1.138 | 1.106 | 1.314 | -0.054 | 0.033 |
| 405 | pm14-pm29 | 0.991 | 1.138 | 0.977 | 1.03  | -0.045 | 0.194 |
| 406 | pm14-pm30 | 0.897 | 0.889 | 0.946 | 0.898 | -0.007 | 0.441 |
| 407 | pm14-pm31 | 1.021 | 1.089 | 1.043 | 1.035 | 0.021  | 0.211 |
| 408 | pm14-pm32 | 0.998 | 1.174 | 0.992 | 1.031 | 0.009  | 0.586 |
| 409 | pm14-pm33 | 1.018 | 1.041 | 1.01  | 1     | 0.015  | 0.348 |
| 410 | pm14-pm34 | 0.996 | 1.035 | 0.991 | 0.965 | -0.009 | 0.403 |
| 411 | pm14-pm35 | 1.008 | 1.006 | 1.015 | 0.985 | -0.004 | 0.686 |
| 412 | pm14-pm36 | 1.019 | 1.004 | 0.993 | 0.987 | 0      | 0.798 |
| 413 | pm14-pm37 | 0.99  | 0.99  | 1.024 | 0.99  | -0.005 | 0.401 |
| 414 | pm15-pm16 | 1.037 | 1.006 | 1.005 | 1.009 | 0.009  | 0.59  |

|     |           |       |       |       |       |        |       |
|-----|-----------|-------|-------|-------|-------|--------|-------|
| 415 | pm15-pm17 | 0.978 | 0.991 | 1.019 | 0.986 | -0.013 | 0.358 |
| 416 | pm15-pm18 | 0.99  | 1.011 | 1.014 | 0.961 | -0.01  | 0.321 |
| 417 | pm15-pm19 | 0.983 | 1.017 | 1.044 | 1.015 | 0.01   | 0.39  |
| 418 | pm15-pm20 | 1.004 | 1.045 | 1.046 | 0.961 | 0.006  | 0.459 |
| 419 | pm15-pm21 | 1.114 | 1.295 | 1.389 | 1.036 | -0.057 | 0.037 |
| 420 | pm15-pm22 | 1.071 | 1.136 | 1.104 | 1.024 | 0      | 0.76  |
| 421 | pm15-pm23 | 1.049 | 1.23  | 1.082 | 1.005 | -0.036 | 0.233 |
| 422 | pm15-pm24 | 0.979 | 1.003 | 1.019 | 1.005 | -0.007 | 0.453 |
| 423 | pm15-pm25 | 1.005 | 1.033 | 1.026 | 0.995 | 0.01   | 0.416 |
| 424 | pm15-pm26 | 1.014 | 1.037 | 1.033 | 1.003 | 0.017  | 0.338 |
| 425 | pm15-pm27 | 1.009 | 1.076 | 1.028 | 1.028 | 0.009  | 0.439 |
| 426 | pm15-pm28 | 1.251 | 1.104 | 1.213 | 1.336 | -0.035 | 0.247 |
| 427 | pm15-pm29 | 1     | 1.116 | 0.992 | 1.074 | -0.037 | 0.259 |
| 428 | pm15-pm30 | 0.883 | 0.883 | 0.989 | 0.91  | -0.002 | 0.782 |
| 429 | pm15-pm31 | 1.031 | 1.064 | 1.062 | 1.022 | 0.016  | 0.32  |
| 430 | pm15-pm32 | 0.98  | 1.138 | 1.024 | 1.025 | -0.001 | 0.872 |
| 431 | pm15-pm33 | 0.959 | 1.016 | 1.031 | 1.001 | -0.004 | 0.885 |
| 432 | pm15-pm34 | 1.01  | 1.01  | 1.002 | 0.981 | -0.008 | 0.444 |
| 433 | pm15-pm35 | 0.973 | 0.985 | 0.995 | 0.971 | -0.03  | 0.233 |
| 434 | pm15-pm36 | 1     | 1.032 | 1.01  | 0.991 | 0.004  | 1     |
| 435 | pm15-pm37 | 1     | 1.048 | 1.017 | 0.992 | 0.007  | 0.591 |
| 436 | pm16-pm17 | 0.971 | 1.021 | 0.996 | 0.989 | -0.007 | 0.435 |
| 437 | pm16-pm18 | 1.017 | 0.977 | 1.038 | 1.008 | 0.012  | 0.328 |
| 438 | pm16-pm19 | 1.026 | 1.001 | 1.037 | 0.996 | 0.016  | 0.347 |
| 439 | pm16-pm20 | 1.01  | 1.032 | 1.011 | 0.966 | 0.003  | 0.946 |
| 440 | pm16-pm21 | 1.102 | 1.346 | 1.39  | 1.049 | -0.039 | 0.283 |
| 441 | pm16-pm22 | 1.038 | 1.159 | 1.068 | 1.024 | -0.007 | 0.447 |
| 442 | pm16-pm23 | 1.081 | 1.23  | 1.109 | 1.026 | -0.01  | 0.337 |
| 443 | pm16-pm24 | 1.022 | 1.058 | 1.027 | 0.973 | 0.017  | 0.351 |
| 444 | pm16-pm25 | 1.011 | 1.063 | 0.799 | 0.967 | -0.039 | 0.215 |

|     |           |       |       |       |       |        |       |
|-----|-----------|-------|-------|-------|-------|--------|-------|
| 445 | pm16-pm26 | 1.035 | 1.038 | 1.002 | 0.972 | 0.012  | 0.365 |
| 446 | pm16-pm27 | 1.011 | 1.082 | 1.026 | 0.993 | 0.007  | 0.524 |
| 447 | pm16-pm28 | 1.215 | 1.111 | 1.129 | 1.382 | -0.046 | 0.184 |
| 448 | pm16-pm29 | 1.038 | 1.161 | 0.972 | 1.06  | -0.019 | 0.34  |
| 449 | pm16-pm30 | 0.931 | 0.816 | 0.956 | 0.897 | -0.013 | 0.369 |
| 450 | pm16-pm31 | 1.001 | 1.093 | 1.049 | 0.996 | 0.012  | 0.311 |
| 451 | pm16-pm32 | 0.977 | 1.119 | 1.031 | 1.065 | 0.01   | 0.311 |
| 452 | pm16-pm33 | 1.009 | 1.037 | 0.978 | 0.979 | 0.001  | 0.735 |
| 453 | pm16-pm34 | 1.024 | 0.96  | 1.004 | 0.984 | -0.011 | 0.328 |
| 454 | pm16-pm35 | 0.977 | 0.984 | 1.029 | 1.013 | -0.004 | 0.867 |
| 455 | pm16-pm36 | 0.999 | 0.984 | 1.015 | 1     | 0.001  | 0.76  |
| 456 | pm16-pm37 | 1.008 | 1.019 | 1.01  | 1.024 | 0.013  | 0.357 |
| 457 | pm17-pm18 | 0.976 | 0.959 | 0.984 | 1.004 | -0.019 | 0.354 |
| 458 | pm17-pm19 | 0.98  | 1.023 | 1.017 | 1.004 | 0.006  | 0.428 |
| 459 | pm17-pm20 | 0.989 | 1.02  | 1.008 | 1.009 | 0.003  | 0.72  |
| 460 | pm17-pm21 | 1.112 | 1.258 | 1.392 | 1.005 | -0.07  | 0.029 |
| 461 | pm17-pm22 | 1.037 | 1.099 | 1.07  | 0.991 | -0.031 | 0.213 |
| 462 | pm17-pm23 | 1.058 | 1.181 | 1.114 | 1.029 | -0.027 | 0.242 |
| 463 | pm17-pm24 | 1.004 | 1.021 | 1.042 | 0.959 | 0.002  | 0.797 |
| 464 | pm17-pm25 | 1.008 | 1.031 | 0.992 | 0.998 | 0.007  | 0.56  |
| 465 | pm17-pm26 | 0.977 | 1.013 | 0.983 | 0.999 | -0.008 | 0.528 |
| 466 | pm17-pm27 | 0.984 | 0.977 | 1.004 | 0.989 | -0.034 | 0.294 |
| 467 | pm17-pm28 | 1.23  | 1.101 | 1.186 | 1.353 | -0.039 | 0.207 |
| 468 | pm17-pm29 | 0.994 | 1.199 | 0.961 | 1.006 | -0.038 | 0.232 |
| 469 | pm17-pm30 | 0.915 | 0.835 | 0.917 | 0.881 | -0.027 | 0.287 |
| 470 | pm17-pm31 | 1.01  | 1.016 | 1.021 | 1.001 | -0.012 | 0.348 |
| 471 | pm17-pm32 | 0.984 | 1.158 | 1.023 | 1.033 | 0.011  | 0.324 |
| 472 | pm17-pm33 | 1.006 | 0.993 | 1.01  | 0.967 | -0.007 | 0.436 |
| 473 | pm17-pm34 | 0.989 | 0.96  | 1.007 | 0.974 | -0.022 | 0.208 |
| 474 | pm17-pm35 | 0.986 | 0.974 | 1.02  | 1.003 | -0.01  | 0.513 |

|     |           |       |       |       |       |        |       |
|-----|-----------|-------|-------|-------|-------|--------|-------|
| 475 | pm17-pm36 | 1.004 | 1.01  | 0.985 | 0.949 | -0.013 | 0.305 |
| 476 | pm17-pm37 | 0.996 | 1.019 | 0.991 | 0.996 | -0.002 | 0.911 |
| 477 | pm18-pm19 | 0.982 | 1.001 | 0.997 | 0.999 | -0.003 | 0.865 |
| 478 | pm18-pm20 | 1.007 | 0.977 | 0.995 | 1.009 | -0.004 | 0.615 |
| 479 | pm18-pm21 | 1.109 | 1.251 | 1.391 | 1.011 | -0.069 | 0.035 |
| 480 | pm18-pm22 | 1.067 | 1.193 | 1.1   | 0.993 | 0.011  | 0.371 |
| 481 | pm18-pm23 | 1.111 | 1.241 | 1.12  | 1.053 | 0.011  | 0.358 |
| 482 | pm18-pm24 | 0.992 | 1.038 | 0.988 | 1.009 | 0.005  | 0.664 |
| 483 | pm18-pm25 | 0.988 | 1.008 | 1.005 | 1.004 | 0.003  | 0.698 |
| 484 | pm18-pm26 | 1.004 | 0.994 | 0.987 | 1.017 | 0.002  | 0.639 |
| 485 | pm18-pm27 | 1.003 | 1.054 | 1.003 | 1.015 | -0.001 | 0.89  |
| 486 | pm18-pm28 | 1.222 | 1.107 | 1.13  | 1.383 | -0.044 | 0.169 |
| 487 | pm18-pm29 | 1.006 | 1.219 | 0.999 | 1.04  | -0.01  | 0.555 |
| 488 | pm18-pm30 | 0.947 | 0.869 | 0.942 | 0.88  | -0.002 | 0.646 |
| 489 | pm18-pm31 | 1.019 | 1.019 | 1.026 | 1.014 | -0.003 | 0.693 |
| 490 | pm18-pm32 | 1.008 | 1.141 | 0.992 | 1.037 | 0.008  | 0.55  |
| 491 | pm18-pm33 | 1.002 | 1.011 | 0.982 | 1     | 0      | 0.849 |
| 492 | pm18-pm34 | 1.036 | 1.058 | 1.008 | 0.989 | 0.02   | 0.222 |
| 493 | pm18-pm35 | 0.987 | 1.009 | 0.996 | 0.99  | -0.008 | 0.54  |
| 494 | pm18-pm36 | 1.004 | 1.017 | 1.004 | 0.98  | 0.004  | 0.838 |
| 495 | pm18-pm37 | 1.011 | 1     | 1.019 | 1.029 | 0.014  | 0.316 |
| 496 | pm19-pm20 | 0.993 | 1.01  | 1.005 | 0.984 | -0.003 | 0.669 |
| 497 | pm19-pm21 | 1.125 | 1.261 | 1.351 | 1.014 | -0.072 | 0.015 |
| 498 | pm19-pm22 | 1.058 | 1.182 | 1.088 | 1.029 | 0.012  | 0.305 |
| 499 | pm19-pm23 | 1.067 | 1.196 | 1.087 | 1.056 | -0.019 | 0.347 |
| 500 | pm19-pm24 | 0.97  | 1.023 | 0.992 | 0.997 | -0.007 | 0.539 |
| 501 | pm19-pm25 | 0.983 | 0.987 | 0.996 | 0.998 | -0.008 | 0.486 |
| 502 | pm19-pm26 | 1.009 | 0.982 | 0.985 | 1.013 | -0.001 | 0.746 |
| 503 | pm19-pm27 | 1.008 | 1.007 | 1.023 | 1.01  | -0.008 | 0.475 |
| 504 | pm19-pm28 | 1.238 | 1.078 | 1.137 | 1.336 | -0.057 | 0.043 |

|     |           |       |       |       |       |        |       |
|-----|-----------|-------|-------|-------|-------|--------|-------|
| 505 | pm19-pm29 | 1.044 | 1.208 | 1.055 | 1.055 | 0.015  | 0.33  |
| 506 | pm19-pm30 | 0.914 | 0.888 | 0.954 | 0.885 | -0.002 | 0.931 |
| 507 | pm19-pm31 | 1.017 | 1.028 | 1.022 | 1.01  | -0.003 | 0.989 |
| 508 | pm19-pm32 | 0.991 | 1.128 | 0.989 | 1.04  | 0      | 0.975 |
| 509 | pm19-pm33 | 1.012 | 0.984 | 1.002 | 0.99  | -0.002 | 0.681 |
| 510 | pm19-pm34 | 0.969 | 1.051 | 0.99  | 0.997 | -0.001 | 0.612 |
| 511 | pm19-pm35 | 1.036 | 1.026 | 0.983 | 0.985 | 0.004  | 0.842 |
| 512 | pm19-pm36 | 1.006 | 0.984 | 1.006 | 1.009 | 0.003  | 0.873 |
| 513 | pm19-pm37 | 1.017 | 0.996 | 0.993 | 1.034 | 0.009  | 0.513 |
| 514 | pm20-pm21 | 1.118 | 1.222 | 1.389 | 1.011 | -0.077 | 0.013 |
| 515 | pm20-pm22 | 1.051 | 1.149 | 1.099 | 0.997 | -0.006 | 0.411 |
| 516 | pm20-pm23 | 1.089 | 1.254 | 1.099 | 1.054 | 0      | 0.938 |
| 517 | pm20-pm24 | 1.034 | 1.014 | 0.985 | 0.982 | -0.002 | 0.777 |
| 518 | pm20-pm25 | 1.01  | 0.993 | 0.991 | 1.006 | -0.002 | 0.673 |
| 519 | pm20-pm26 | 1.006 | 0.987 | 0.983 | 0.991 | -0.01  | 0.478 |
| 520 | pm20-pm27 | 1.008 | 1.048 | 1.019 | 1.024 | 0.002  | 0.736 |
| 521 | pm20-pm28 | 1.234 | 1.078 | 1.116 | 1.394 | -0.052 | 0.041 |
| 522 | pm20-pm29 | 1.061 | 1.149 | 1.007 | 1.088 | -0.003 | 0.84  |
| 523 | pm20-pm30 | 0.942 | 0.901 | 0.931 | 0.874 | -0.003 | 0.833 |
| 524 | pm20-pm31 | 1.014 | 1.046 | 1.009 | 1.015 | -0.004 | 0.99  |
| 525 | pm20-pm32 | 1.001 | 1.133 | 1.006 | 1.039 | 0.005  | 0.467 |
| 526 | pm20-pm33 | 0.984 | 1.012 | 0.977 | 0.996 | -0.01  | 0.596 |
| 527 | pm20-pm34 | 1     | 1.055 | 1.026 | 0.993 | 0.013  | 0.344 |
| 528 | pm20-pm35 | 0.992 | 1.044 | 0.989 | 0.977 | -0.007 | 0.543 |
| 529 | pm20-pm36 | 1.003 | 1.028 | 0.986 | 0.997 | 0.002  | 0.82  |
| 530 | pm20-pm37 | 0.988 | 0.986 | 0.989 | 1.025 | -0.007 | 0.417 |
| 531 | pm21-pm22 | 1.194 | 1.416 | 1.443 | 1.061 | -0.061 | 0.023 |
| 532 | pm21-pm23 | 1.215 | 1.516 | 1.516 | 1.087 | -0.049 | 0.158 |
| 533 | pm21-pm24 | 1.125 | 1.317 | 1.382 | 1.013 | -0.054 | 0.033 |
| 534 | pm21-pm25 | 1.119 | 1.287 | 1.365 | 1.02  | -0.062 | 0.036 |



|     |           |       |       |       |       |        |       |
|-----|-----------|-------|-------|-------|-------|--------|-------|
| 535 | pm21-pm26 | 1.11  | 1.3   | 1.379 | 1.015 | -0.059 | 0.027 |
| 536 | pm21-pm27 | 1.113 | 1.27  | 1.358 | 1.034 | -0.088 | 0.011 |
| 537 | pm21-pm28 | 1.347 | 1.361 | 1.501 | 1.37  | -0.121 | 0.005 |
| 538 | pm21-pm29 | 1.129 | 1.496 | 1.399 | 1.103 | -0.055 | 0.04  |
| 539 | pm21-pm30 | 1.014 | 1.164 | 1.342 | 0.9   | -0.068 | 0.028 |
| 540 | pm21-pm31 | 1.133 | 1.342 | 1.366 | 1.03  | -0.066 | 0.043 |
| 541 | pm21-pm32 | 1.106 | 1.459 | 1.353 | 1.08  | -0.049 | 0.169 |
| 542 | pm21-pm33 | 1.124 | 1.265 | 1.358 | 0.996 | -0.074 | 0.019 |
| 543 | pm21-pm34 | 1.137 | 1.294 | 1.348 | 1.027 | -0.063 | 0.037 |
| 544 | pm21-pm35 | 1.11  | 1.272 | 1.383 | 1.058 | -0.06  | 0.036 |
| 545 | pm21-pm36 | 1.134 | 1.274 | 1.392 | 1.042 | -0.049 | 0.164 |
| 546 | pm21-pm37 | 1.121 | 1.305 | 1.348 | 1.01  | -0.066 | 0.045 |
| 547 | pm22-pm23 | 1.376 | 1.555 | 1.402 | 1.041 | 0.143  | 0.009 |
| 548 | pm22-pm24 | 1.073 | 1.238 | 1.104 | 1.017 | 0.026  | 0.262 |
| 549 | pm22-pm25 | 1.04  | 1.107 | 1.102 | 1.016 | -0.012 | 0.331 |
| 550 | pm22-pm26 | 1.04  | 1.173 | 1.116 | 1.03  | 0.012  | 0.314 |
| 551 | pm22-pm27 | 1.058 | 1.191 | 1.108 | 1.04  | -0.001 | 0.799 |
| 552 | pm22-pm28 | 1.291 | 1.238 | 1.269 | 1.414 | -0.031 | 0.239 |
| 553 | pm22-pm29 | 1.084 | 1.291 | 1.074 | 1.067 | -0.027 | 0.235 |
| 554 | pm22-pm30 | 0.916 | 1.007 | 1.036 | 0.953 | -0.013 | 0.314 |
| 555 | pm22-pm31 | 1.052 | 1.206 | 1.103 | 1.02  | -0.007 | 0.583 |
| 556 | pm22-pm32 | 1.047 | 1.282 | 1.063 | 1.053 | -0.005 | 0.942 |
| 557 | pm22-pm33 | 1.037 | 1.135 | 1.071 | 1.032 | -0.009 | 0.413 |
| 558 | pm22-pm34 | 1.043 | 1.158 | 1.059 | 1.047 | -0.005 | 0.451 |
| 559 | pm22-pm35 | 1.059 | 1.09  | 1.086 | 1.032 | -0.017 | 0.4   |
| 560 | pm22-pm36 | 1.06  | 1.144 | 1.079 | 1.006 | -0.005 | 0.471 |
| 561 | pm22-pm37 | 1.063 | 1.154 | 1.118 | 1.024 | 0.009  | 0.454 |
| 562 | pm23-pm24 | 1.124 | 1.263 | 1.09  | 1.043 | 0.005  | 0.416 |
| 563 | pm23-pm25 | 1.03  | 1.275 | 1.088 | 1.016 | -0.019 | 0.377 |
| 564 | pm23-pm26 | 1.115 | 1.259 | 1.074 | 1.056 | 0.005  | 0.827 |

|     |           |       |       |       |       |        |       |
|-----|-----------|-------|-------|-------|-------|--------|-------|
| 565 | pm23-pm27 | 1.111 | 1.277 | 1.129 | 1.034 | -0.005 | 0.462 |
| 566 | pm23-pm28 | 1.371 | 1.395 | 1.245 | 1.401 | -0.024 | 0.245 |
| 567 | pm23-pm29 | 1.061 | 1.418 | 1.074 | 1.086 | -0.039 | 0.259 |
| 568 | pm23-pm30 | 0.989 | 1.119 | 1.041 | 0.907 | -0.021 | 0.246 |
| 569 | pm23-pm31 | 1.089 | 1.293 | 1.117 | 1.034 | -0.012 | 0.334 |
| 570 | pm23-pm32 | 1.07  | 1.406 | 1.106 | 1.083 | 0.007  | 0.534 |
| 571 | pm23-pm33 | 1.064 | 1.26  | 1.132 | 1.019 | -0.003 | 0.891 |
| 572 | pm23-pm34 | 1.048 | 1.255 | 1.097 | 1.032 | -0.018 | 0.343 |
| 573 | pm23-pm35 | 1.081 | 1.218 | 1.096 | 1.019 | -0.023 | 0.3   |
| 574 | pm23-pm36 | 1.08  | 1.203 | 1.13  | 1.059 | -0.003 | 0.81  |
| 575 | pm23-pm37 | 1.037 | 1.28  | 1.134 | 1.039 | -0.001 | 0.979 |
| 576 | pm24-pm25 | 0.997 | 0.986 | 1.012 | 0.984 | -0.008 | 0.429 |
| 577 | pm24-pm26 | 1     | 1.052 | 0.996 | 0.98  | 0.004  | 0.904 |
| 578 | pm24-pm27 | 0.992 | 1.087 | 1.027 | 1.015 | 0.006  | 0.533 |
| 579 | pm24-pm28 | 1.271 | 1.127 | 1.17  | 1.345 | -0.03  | 0.242 |
| 580 | pm24-pm29 | 0.992 | 1.169 | 0.997 | 1.052 | -0.028 | 0.254 |
| 581 | pm24-pm30 | 0.892 | 0.932 | 0.936 | 0.915 | 0.003  | 0.842 |
| 582 | pm24-pm31 | 0.999 | 1.041 | 1.027 | 1.009 | -0.007 | 0.445 |
| 583 | pm24-pm32 | 1.001 | 1.173 | 1.01  | 1.046 | 0.016  | 0.304 |
| 584 | pm24-pm33 | 0.978 | 1.015 | 1.021 | 0.991 | -0.002 | 0.799 |
| 585 | pm24-pm34 | 1.031 | 1.021 | 1.003 | 0.989 | 0.004  | 0.955 |
| 586 | pm24-pm35 | 1.022 | 0.998 | 1.01  | 0.985 | -0.005 | 0.839 |
| 587 | pm24-pm36 | 0.98  | 1.028 | 1.022 | 1.001 | 0.006  | 0.506 |
| 588 | pm24-pm37 | 0.992 | 1.009 | 0.988 | 0.993 | -0.009 | 0.439 |
| 589 | pm25-pm26 | 1.013 | 0.986 | 1.004 | 0.999 | 0.002  | 0.827 |
| 590 | pm25-pm27 | 1.006 | 1.007 | 1.017 | 1.027 | -0.007 | 0.467 |
| 591 | pm25-pm28 | 1.258 | 1.036 | 1.108 | 1.34  | -0.069 | 0.023 |
| 592 | pm25-pm29 | 0.986 | 1.171 | 1.008 | 1.044 | -0.024 | 0.212 |
| 593 | pm25-pm30 | 0.913 | 0.884 | 0.965 | 0.925 | 0.01   | 0.487 |
| 594 | pm25-pm31 | 1.004 | 1.046 | 1.029 | 1.012 | 0      | 0.822 |

|     |           |       |       |       |       |        |       |
|-----|-----------|-------|-------|-------|-------|--------|-------|
| 595 | pm25-pm32 | 1.014 | 1.116 | 0.991 | 1.038 | 0.003  | 0.631 |
| 596 | pm25-pm33 | 1.011 | 0.991 | 0.981 | 0.997 | -0.004 | 0.927 |
| 597 | pm25-pm34 | 0.996 | 1.043 | 0.988 | 0.995 | 0.002  | 0.653 |
| 598 | pm25-pm35 | 0.995 | 1.014 | 1.01  | 0.965 | -0.008 | 0.409 |
| 599 | pm25-pm36 | 1.005 | 1.01  | 1.014 | 1.014 | 0.013  | 0.346 |
| 600 | pm25-pm37 | 1.024 | 0.99  | 1.003 | 1.021 | 0.008  | 0.588 |
| 601 | pm26-pm27 | 1.012 | 1.06  | 1.048 | 1.007 | 0.011  | 0.342 |
| 602 | pm26-pm28 | 1.219 | 1.06  | 1.082 | 1.382 | -0.069 | 0.036 |
| 603 | pm26-pm29 | 0.993 | 1.149 | 0.979 | 1.077 | -0.027 | 0.27  |
| 604 | pm26-pm30 | 0.94  | 0.893 | 0.954 | 0.92  | 0.015  | 0.31  |
| 605 | pm26-pm31 | 1.025 | 1.052 | 1.041 | 1.03  | 0.014  | 0.343 |
| 606 | pm26-pm32 | 1     | 1.11  | 1.013 | 1.048 | 0.006  | 0.592 |
| 607 | pm26-pm33 | 1.002 | 0.983 | 0.99  | 1.001 | -0.005 | 0.552 |
| 608 | pm26-pm34 | 0.991 | 1.029 | 1.027 | 0.989 | 0.006  | 0.561 |
| 609 | pm26-pm35 | 0.988 | 1.067 | 0.994 | 0.974 | 0.001  | 0.668 |
| 610 | pm26-pm36 | 0.988 | 0.982 | 0.997 | 0.988 | -0.01  | 0.589 |
| 611 | pm26-pm37 | 0.995 | 1.003 | 1.005 | 0.987 | -0.004 | 0.772 |
| 612 | pm27-pm28 | 1.246 | 1.157 | 1.133 | 1.356 | -0.053 | 0.021 |
| 613 | pm27-pm29 | 1.011 | 1.226 | 0.991 | 1.074 | -0.022 | 0.242 |
| 614 | pm27-pm30 | 0.929 | 0.933 | 0.971 | 0.917 | 0.004  | 0.678 |
| 615 | pm27-pm31 | 1.009 | 1.116 | 1.06  | 1.01  | 0.004  | 0.851 |
| 616 | pm27-pm32 | 0.99  | 1.152 | 1.02  | 1.052 | -0.005 | 0.451 |
| 617 | pm27-pm33 | 1.003 | 1.025 | 1     | 1.015 | -0.01  | 0.535 |
| 618 | pm27-pm34 | 1.037 | 1.054 | 1.05  | 1.003 | 0.011  | 0.376 |
| 619 | pm27-pm35 | 1.022 | 1.076 | 1.015 | 1.033 | 0.011  | 0.306 |
| 620 | pm27-pm36 | 1.034 | 1.042 | 1.016 | 0.996 | 0.002  | 0.972 |
| 621 | pm27-pm37 | 1.02  | 1.045 | 1.01  | 1.017 | 0      | 0.909 |
| 622 | pm28-pm29 | 1.324 | 1.22  | 1.102 | 1.46  | -0.055 | 0.03  |
| 623 | pm28-pm30 | 1.153 | 0.982 | 1.098 | 1.257 | -0.046 | 0.152 |
| 624 | pm28-pm31 | 1.253 | 1.1   | 1.145 | 1.382 | -0.059 | 0.043 |

|     |           |       |       |       |       |        |       |
|-----|-----------|-------|-------|-------|-------|--------|-------|
| 625 | pm28-pm32 | 1.224 | 1.188 | 1.157 | 1.406 | -0.049 | 0.2   |
| 626 | pm28-pm33 | 1.204 | 1.03  | 1.127 | 1.362 | -0.074 | 0.015 |
| 627 | pm28-pm34 | 1.238 | 1.114 | 1.155 | 1.359 | -0.043 | 0.195 |
| 628 | pm28-pm35 | 1.242 | 1.094 | 1.142 | 1.349 | -0.054 | 0.042 |
| 629 | pm28-pm36 | 1.223 | 1.081 | 1.148 | 1.292 | -0.068 | 0.042 |
| 630 | pm28-pm37 | 1.211 | 1.076 | 1.137 | 1.37  | -0.059 | 0.021 |
| 631 | pm29-pm30 | 1.013 | 1.277 | 0.784 | 0.917 | 0.008  | 0.5   |
| 632 | pm29-pm31 | 1.019 | 1.238 | 1.034 | 1.075 | -0.008 | 0.507 |
| 633 | pm29-pm32 | 1.028 | 1.333 | 0.979 | 1.099 | -0.004 | 0.798 |
| 634 | pm29-pm33 | 0.973 | 1.158 | 0.984 | 1.038 | -0.038 | 0.216 |
| 635 | pm29-pm34 | 1.007 | 1.127 | 0.994 | 1.028 | -0.042 | 0.169 |
| 636 | pm29-pm35 | 0.99  | 1.09  | 1     | 1.052 | -0.049 | 0.163 |
| 637 | pm29-pm36 | 1.018 | 1.18  | 1.026 | 1.07  | -0.002 | 0.745 |
| 638 | pm29-pm37 | 1.014 | 1.227 | 1     | 1.048 | -0.006 | 0.554 |
| 639 | pm30-pm31 | 0.933 | 0.956 | 0.999 | 0.876 | 0.005  | 0.599 |
| 640 | pm30-pm32 | 0.934 | 0.97  | 0.969 | 0.926 | 0      | 0.663 |
| 641 | pm30-pm33 | 0.929 | 0.916 | 0.94  | 0.919 | 0.014  | 0.363 |
| 642 | pm30-pm34 | 0.912 | 0.924 | 0.996 | 0.891 | 0.014  | 0.385 |
| 643 | pm30-pm35 | 0.949 | 0.917 | 0.962 | 0.892 | 0.012  | 0.302 |
| 644 | pm30-pm36 | 0.956 | 0.888 | 0.944 | 0.913 | 0.014  | 0.359 |
| 645 | pm30-pm37 | 0.966 | 0.898 | 0.958 | 0.93  | 0.024  | 0.256 |
| 646 | pm31-pm32 | 1.013 | 1.164 | 1.04  | 1.043 | 0.004  | 0.945 |
| 647 | pm31-pm33 | 1.03  | 0.988 | 1.026 | 0.996 | -0.013 | 0.328 |
| 648 | pm31-pm34 | 1.002 | 1.052 | 1.046 | 1.003 | -0.001 | 0.705 |
| 649 | pm31-pm35 | 0.997 | 1.067 | 1.015 | 0.98  | -0.013 | 0.398 |
| 650 | pm31-pm36 | 1.013 | 1.044 | 1.057 | 1.033 | 0.015  | 0.359 |
| 651 | pm31-pm37 | 1.006 | 1.056 | 1.064 | 1.002 | 0.007  | 0.422 |
| 652 | pm32-pm33 | 0.983 | 1.124 | 1.005 | 1.008 | -0.007 | 0.533 |
| 653 | pm32-pm34 | 0.991 | 1.194 | 1.003 | 1.026 | 0.012  | 0.387 |
| 654 | pm32-pm35 | 1.007 | 1.126 | 1.014 | 1.034 | 0.003  | 0.753 |

|     |           |       |       |       |       |        |       |
|-----|-----------|-------|-------|-------|-------|--------|-------|
| 655 | pm32-pm36 | 0.985 | 1.125 | 1.018 | 1.025 | 0.002  | 0.713 |
| 656 | pm32-pm37 | 1.003 | 1.152 | 1.027 | 1.02  | 0.012  | 0.351 |
| 657 | pm33-pm34 | 0.977 | 1.151 | 0.997 | 1.022 | 0.033  | 0.271 |
| 658 | pm33-pm35 | 0.994 | 1.042 | 0.99  | 0.995 | 0.001  | 0.785 |
| 659 | pm33-pm36 | 1     | 1.006 | 0.979 | 1.004 | -0.001 | 0.748 |
| 660 | pm33-pm37 | 1.016 | 0.981 | 1.021 | 1.016 | 0.007  | 0.442 |
| 661 | pm34-pm35 | 1.009 | 1.004 | 1.021 | 0.979 | -0.005 | 0.563 |
| 662 | pm34-pm36 | 1     | 0.998 | 1.016 | 0.994 | -0.001 | 0.971 |
| 663 | pm34-pm37 | 1.011 | 1.041 | 1.026 | 0.997 | 0.013  | 0.387 |
| 664 | pm35-pm36 | 0.986 | 1.037 | 1     | 0.969 | -0.006 | 0.486 |
| 665 | pm35-pm37 | 0.992 | 1.015 | 0.977 | 1.008 | -0.009 | 0.474 |
| 666 | pm36-pm37 | 1.022 | 0.994 | 0.995 | 1.002 | 0.003  | 0.99  |

3d) Result of two-distribution perturbation analysis for apoptosis in when four different response function types were applied in a combined manner

| No | Pair of perturbed parameter distributions | 1 million parameter sets |         | 10 million parameter sets |         | 100 million parameter sets |         |
|----|-------------------------------------------|--------------------------|---------|---------------------------|---------|----------------------------|---------|
|    |                                           | Synergistic effect       | p-value | Synergistic effect        | p-value | Synergistic effect         | p-value |
| 1  | pm1-pm2                                   | 0.01                     | 0.396   | 0                         | 0.83    | 0.022                      | 0.287   |
| 2  | pm1-pm3                                   | -0.001                   | 0.772   | 0.01                      | 0.309   | 0.045                      | 0.161   |
| 3  | pm1-pm4                                   | 0.012                    | 0.364   | 0.044                     | 0.159   | 0.026                      | 0.246   |
| 4  | pm1-pm5                                   | -0.002                   | 0.781   | -0.01                     | 0.49    | -0.029                     | 0.274   |
| 5  | pm1-pm6                                   | -0.176                   | 0.002   | -0.18                     | 0.003   | -0.165                     | 0.004   |
| 6  | pm1-pm7                                   | -0.158                   | 0.002   | -0.173                    | 0.004   | -0.183                     | 0.003   |
| 7  | pm1-pm8                                   | 0.013                    | 0.334   | 0.01                      | 0.325   | -0.021                     | 0.284   |

|    |          |        |        |        |        |        |        |
|----|----------|--------|--------|--------|--------|--------|--------|
| 8  | pm1-pm9  | 0.021  | 0.272  | 0.003  | 0.69   | 0.012  | 0.363  |
| 9  | pm1-pm10 | 0.11   | 0.006  | 0.125  | 0.008  | 0.108  | 0.007  |
| 10 | pm1-pm11 | 0.027  | 0.294  | 0.02   | 0.39   | -0.005 | 0.959  |
| 11 | pm1-pm12 | -0.042 | 0.166  | -0.07  | 0.016  | -0.083 | 0.015  |
| 12 | pm1-pm13 | -0.008 | 0.509  | -0.045 | 0.165  | -0.022 | 0.287  |
| 13 | pm1-pm14 | 0.003  | 0.785  | -0.003 | 0.745  | 0      | 0.92   |
| 14 | pm1-pm15 | 0.042  | 0.199  | 0.018  | 0.399  | -0.004 | 0.732  |
| 15 | pm1-pm16 | -0.02  | 0.285  | 0.014  | 0.308  | -0.003 | 0.826  |
| 16 | pm1-pm17 | -0.024 | 0.215  | 0.007  | 0.546  | 0.013  | 0.363  |
| 17 | pm1-pm18 | 0.006  | 0.516  | -0.017 | 0.393  | 0.023  | 0.238  |
| 18 | pm1-pm19 | -0.029 | 0.248  | -0.016 | 0.368  | -0.037 | 0.257  |
| 19 | pm1-pm20 | 0.009  | 0.438  | 0.017  | 0.347  | 0.002  | 0.733  |
| 20 | pm1-pm21 | -0.059 | 0.021  | -0.061 | 0.021  | -0.052 | 0.023  |
| 21 | pm1-pm22 | -0.016 | 0.312  | -0.006 | 0.486  | 0.016  | 0.331  |
| 22 | pm1-pm23 | -0.272 | <0.001 | -0.271 | <0.001 | -0.275 | <0.001 |
| 23 | pm1-pm24 | 0      | 0.954  | -0.013 | 0.381  | -0.023 | 0.249  |
| 24 | pm1-pm25 | 0.044  | 0.193  | 0.039  | 0.258  | 0.003  | 0.601  |
| 25 | pm1-pm26 | 0.021  | 0.214  | -0.023 | 0.278  | 0.013  | 0.375  |
| 26 | pm1-pm27 | -0.027 | 0.245  | 0.012  | 0.357  | -0.016 | 0.328  |
| 27 | pm1-pm28 | -0.256 | <0.001 | -0.259 | <0.001 | -0.264 | <0.001 |
| 28 | pm1-pm29 | -0.014 | 0.351  | -0.02  | 0.231  | -0.029 | 0.209  |
| 29 | pm1-pm30 | -0.03  | 0.218  | -0.051 | 0.039  | -0.05  | 0.036  |
| 30 | pm1-pm31 | 0.026  | 0.237  | 0.026  | 0.296  | -0.001 | 0.881  |
| 31 | pm1-pm32 | 0.007  | 0.562  | -0.022 | 0.27   | -0.022 | 0.262  |
| 32 | pm1-pm33 | -0.012 | 0.395  | -0.013 | 0.34   | -0.004 | 0.835  |
| 33 | pm1-pm34 | 0.002  | 0.68   | 0.022  | 0.229  | 0.004  | 0.707  |
| 34 | pm1-pm35 | 0.022  | 0.297  | 0.015  | 0.357  | 0.038  | 0.227  |
| 35 | pm1-pm36 | -0.019 | 0.384  | -0.002 | 0.715  | 0.011  | 0.31   |
| 36 | pm1-pm37 | -0.018 | 0.397  | 0.005  | 0.654  | -0.034 | 0.209  |
| 37 | pm2-pm3  | 0.011  | 0.343  | 0.009  | 0.437  | 0.023  | 0.254  |

|    |          |        |        |        |        |        |        |
|----|----------|--------|--------|--------|--------|--------|--------|
| 38 | pm2-pm4  | -0.002 | 0.686  | -0.031 | 0.249  | -0.027 | 0.208  |
| 39 | pm2-pm5  | -0.016 | 0.357  | 0.008  | 0.474  | -0.024 | 0.219  |
| 40 | pm2-pm6  | 0.013  | 0.351  | 0.01   | 0.403  | 0.01   | 0.302  |
| 41 | pm2-pm7  | -0.017 | 0.354  | -0.048 | 0.192  | -0.039 | 0.297  |
| 42 | pm2-pm8  | 0.012  | 0.302  | -0.026 | 0.258  | 0.015  | 0.308  |
| 43 | pm2-pm9  | 0.039  | 0.223  | 0.041  | 0.175  | 0.043  | 0.176  |
| 44 | pm2-pm10 | 0.113  | 0.009  | 0.096  | 0.017  | 0.117  | 0.010  |
| 45 | pm2-pm11 | 0.007  | 0.577  | -0.024 | 0.276  | -0.019 | 0.348  |
| 46 | pm2-pm12 | -0.062 | 0.038  | -0.058 | 0.038  | -0.04  | 0.157  |
| 47 | pm2-pm13 | -0.035 | 0.221  | -0.039 | 0.257  | 0.006  | 0.547  |
| 48 | pm2-pm14 | -0.001 | 0.659  | 0.007  | 0.523  | -0.03  | 0.291  |
| 49 | pm2-pm15 | 0.036  | 0.299  | -0.003 | 0.929  | 0      | 0.933  |
| 50 | pm2-pm16 | 0.009  | 0.492  | 0.008  | 0.436  | 0.04   | 0.247  |
| 51 | pm2-pm17 | -0.013 | 0.375  | 0.005  | 0.781  | -0.004 | 0.845  |
| 52 | pm2-pm18 | -0.019 | 0.394  | -0.013 | 0.31   | -0.005 | 0.432  |
| 53 | pm2-pm19 | -0.019 | 0.308  | 0.008  | 0.569  | 0.019  | 0.391  |
| 54 | pm2-pm20 | -0.015 | 0.368  | -0.024 | 0.277  | 0      | 0.729  |
| 55 | pm2-pm21 | -0.123 | 0.01   | -0.081 | 0.019  | -0.101 | 0.01   |
| 56 | pm2-pm22 | 0.002  | 0.724  | 0.021  | 0.214  | 0.028  | 0.252  |
| 57 | pm2-pm23 | 0.009  | 0.491  | 0.003  | 0.945  | 0.01   | 0.429  |
| 58 | pm2-pm24 | -0.03  | 0.252  | -0.021 | 0.28   | 0.005  | 0.714  |
| 59 | pm2-pm25 | 0.007  | 0.449  | -0.012 | 0.349  | -0.023 | 0.232  |
| 60 | pm2-pm26 | -0.015 | 0.38   | 0.021  | 0.22   | 0.012  | 0.314  |
| 61 | pm2-pm27 | 0.022  | 0.251  | -0.007 | 0.528  | 0.024  | 0.295  |
| 62 | pm2-pm28 | -0.494 | <0.001 | -0.448 | <0.001 | -0.474 | <0.001 |
| 63 | pm2-pm29 | 0.019  | 0.35   | -0.017 | 0.373  | 0.003  | 0.891  |
| 64 | pm2-pm30 | -0.03  | 0.283  | -0.039 | 0.298  | -0.029 | 0.217  |
| 65 | pm2-pm31 | -0.024 | 0.283  | 0.009  | 0.567  | -0.005 | 0.56   |
| 66 | pm2-pm32 | 0.006  | 0.575  | 0.004  | 0.722  | -0.012 | 0.325  |
| 67 | pm2-pm33 | -0.023 | 0.226  | -0.025 | 0.209  | -0.013 | 0.367  |

|    |          |        |        |        |        |        |        |
|----|----------|--------|--------|--------|--------|--------|--------|
| 68 | pm2-pm34 | -0.032 | 0.296  | -0.012 | 0.34   | -0.039 | 0.275  |
| 69 | pm2-pm35 | -0.01  | 0.463  | -0.008 | 0.489  | -0.004 | 0.863  |
| 70 | pm2-pm36 | 0.016  | 0.311  | 0.019  | 0.328  | 0.01   | 0.472  |
| 71 | pm2-pm37 | 0.017  | 0.351  | -0.015 | 0.339  | 0.021  | 0.289  |
| 72 | pm3-pm4  | -0.01  | 0.417  | -0.003 | 0.787  | 0.023  | 0.26   |
| 73 | pm3-pm5  | 0.022  | 0.246  | -0.018 | 0.319  | -0.004 | 0.962  |
| 74 | pm3-pm6  | -0.143 | 0.008  | -0.152 | 0.005  | -0.149 | 0.006  |
| 75 | pm3-pm7  | -0.128 | 0.009  | -0.167 | 0.004  | -0.152 | 0.003  |
| 76 | pm3-pm8  | 0.004  | 0.843  | 0.01   | 0.508  | 0.026  | 0.236  |
| 77 | pm3-pm9  | -0.457 | <0.001 | -0.452 | <0.001 | -0.452 | <0.001 |
| 78 | pm3-pm10 | 0.101  | 0.006  | 0.103  | 0.008  | 0.111  | 0.009  |
| 79 | pm3-pm11 | 0      | 0.958  | 0.03   | 0.229  | 0.029  | 0.233  |
| 80 | pm3-pm12 | -0.082 | 0.012  | -0.073 | 0.012  | -0.086 | 0.019  |
| 81 | pm3-pm13 | -0.001 | 0.723  | 0.006  | 0.434  | -0.041 | 0.177  |
| 82 | pm3-pm14 | 0      | 0.674  | 0.017  | 0.353  | -0.022 | 0.254  |
| 83 | pm3-pm15 | -0.01  | 0.387  | 0.02   | 0.307  | -0.013 | 0.315  |
| 84 | pm3-pm16 | -0.018 | 0.347  | 0      | 0.651  | 0.019  | 0.396  |
| 85 | pm3-pm17 | -0.025 | 0.26   | -0.012 | 0.327  | 0.001  | 0.867  |
| 86 | pm3-pm18 | -0.009 | 0.438  | -0.003 | 0.832  | 0.004  | 0.89   |
| 87 | pm3-pm19 | -0.007 | 0.426  | 0.013  | 0.348  | -0.012 | 0.315  |
| 88 | pm3-pm20 | 0.023  | 0.254  | -0.003 | 0.656  | -0.012 | 0.384  |
| 89 | pm3-pm21 | -0.085 | 0.018  | -0.09  | 0.014  | -0.077 | 0.016  |
| 90 | pm3-pm22 | -0.164 | 0.005  | -0.136 | 0.006  | -0.138 | 0.009  |
| 91 | pm3-pm23 | 0.026  | 0.263  | 0.042  | 0.198  | 0.004  | 0.849  |
| 92 | pm3-pm24 | 0.026  | 0.2    | -0.012 | 0.329  | -0.009 | 0.437  |
| 93 | pm3-pm25 | 0.004  | 0.697  | -0.01  | 0.501  | 0.02   | 0.32   |
| 94 | pm3-pm26 | 0.039  | 0.285  | -0.001 | 0.7    | 0.009  | 0.42   |
| 95 | pm3-pm27 | -0.009 | 0.508  | 0.013  | 0.315  | -0.011 | 0.398  |
| 96 | pm3-pm28 | -0.48  | <0.001 | -0.49  | <0.001 | -0.485 | <0.001 |
| 97 | pm3-pm29 | -0.054 | 0.035  | -0.06  | 0.022  | -0.039 | 0.258  |



|     |          |        |        |        |        |        |        |
|-----|----------|--------|--------|--------|--------|--------|--------|
| 98  | pm3-pm30 | -0.002 | 0.843  | -0.042 | 0.185  | -0.01  | 0.357  |
| 99  | pm3-pm31 | -0.473 | <0.001 | -0.497 | <0.001 | -0.491 | <0.001 |
| 100 | pm3-pm32 | -0.003 | 0.711  | 0.004  | 0.655  | -0.004 | 0.716  |
| 101 | pm3-pm33 | 0.026  | 0.262  | -0.005 | 0.643  | 0.034  | 0.256  |
| 102 | pm3-pm34 | -0.108 | 0.007  | -0.076 | 0.016  | -0.118 | 0.007  |
| 103 | pm3-pm35 | -0.003 | 0.849  | 0.005  | 0.665  | -0.011 | 0.397  |
| 104 | pm3-pm36 | 0.003  | 0.674  | -0.002 | 0.761  | 0.001  | 0.669  |
| 105 | pm3-pm37 | -0.001 | 0.892  | 0.015  | 0.397  | 0.026  | 0.213  |
| 106 | pm4-pm5  | 0.021  | 0.213  | 0.012  | 0.394  | 0.012  | 0.347  |
| 107 | pm4-pm6  | -0.018 | 0.309  | -0.012 | 0.325  | -0.017 | 0.305  |
| 108 | pm4-pm7  | -0.092 | 0.018  | -0.103 | 0.009  | -0.079 | 0.013  |
| 109 | pm4-pm8  | -0.019 | 0.335  | -0.015 | 0.334  | 0.002  | 0.614  |
| 110 | pm4-pm9  | 0      | 0.915  | 0.021  | 0.225  | -0.009 | 0.486  |
| 111 | pm4-pm10 | 0.043  | 0.177  | -0.002 | 0.633  | 0.004  | 0.686  |
| 112 | pm4-pm11 | -0.001 | 0.905  | 0.009  | 0.441  | 0.013  | 0.307  |
| 113 | pm4-pm12 | -0.056 | 0.023  | -0.095 | 0.012  | -0.081 | 0.011  |
| 114 | pm4-pm13 | -0.009 | 0.491  | 0.001  | 0.968  | -0.01  | 0.304  |
| 115 | pm4-pm14 | 0.029  | 0.276  | -0.012 | 0.363  | 0.007  | 0.453  |
| 116 | pm4-pm15 | 0.028  | 0.283  | -0.007 | 0.566  | 0.003  | 0.621  |
| 117 | pm4-pm16 | 0.038  | 0.27   | 0.021  | 0.224  | 0.017  | 0.341  |
| 118 | pm4-pm17 | -0.023 | 0.29   | 0.003  | 0.917  | -0.003 | 0.766  |
| 119 | pm4-pm18 | -0.004 | 0.937  | 0.005  | 0.658  | 0.002  | 0.755  |
| 120 | pm4-pm19 | 0.013  | 0.306  | 0.001  | 0.845  | -0.006 | 0.426  |
| 121 | pm4-pm20 | -0.017 | 0.343  | 0.018  | 0.348  | 0.025  | 0.285  |
| 122 | pm4-pm21 | -0.06  | 0.03   | -0.101 | 0.005  | -0.082 | 0.016  |
| 123 | pm4-pm22 | 0.007  | 0.562  | -0.016 | 0.336  | 0.012  | 0.339  |
| 124 | pm4-pm23 | -0.225 | <0.001 | -0.225 | <0.001 | -0.247 | <0.001 |
| 125 | pm4-pm24 | 0.014  | 0.339  | -0.019 | 0.363  | -0.002 | 0.817  |
| 126 | pm4-pm25 | -0.005 | 0.478  | -0.005 | 0.679  | -0.016 | 0.323  |
| 127 | pm4-pm26 | 0.024  | 0.285  | 0.01   | 0.378  | 0.024  | 0.259  |

|     |          |        |        |        |        |        |        |
|-----|----------|--------|--------|--------|--------|--------|--------|
| 128 | pm4-pm27 | 0.037  | 0.215  | 0.024  | 0.229  | 0.033  | 0.273  |
| 129 | pm4-pm28 | -0.149 | 0.005  | -0.153 | 0.003  | -0.117 | 0.008  |
| 130 | pm4-pm29 | 0.025  | 0.269  | 0.023  | 0.255  | 0.026  | 0.276  |
| 131 | pm4-pm30 | -0.013 | 0.393  | 0.013  | 0.375  | 0.014  | 0.354  |
| 132 | pm4-pm31 | -0.001 | 0.712  | -0.033 | 0.293  | -0.012 | 0.332  |
| 133 | pm4-pm32 | 0.019  | 0.365  | -0.021 | 0.249  | 0.012  | 0.305  |
| 134 | pm4-pm33 | 0.013  | 0.345  | -0.007 | 0.574  | 0.016  | 0.367  |
| 135 | pm4-pm34 | -0.031 | 0.24   | -0.009 | 0.552  | 0.011  | 0.363  |
| 136 | pm4-pm35 | -0.007 | 0.554  | 0.028  | 0.261  | -0.003 | 0.83   |
| 137 | pm4-pm36 | 0      | 0.823  | -0.016 | 0.301  | 0.012  | 0.334  |
| 138 | pm4-pm37 | 0.004  | 0.704  | -0.011 | 0.316  | -0.01  | 0.346  |
| 139 | pm5-pm6  | -0.155 | 0.003  | -0.165 | 0.001  | -0.18  | 0.003  |
| 140 | pm5-pm7  | -0.264 | <0.001 | -0.235 | <0.001 | -0.222 | <0.001 |
| 141 | pm5-pm8  | 0.003  | 0.93   | 0      | 0.839  | 0.023  | 0.21   |
| 142 | pm5-pm9  | -0.023 | 0.284  | -0.005 | 0.632  | -0.004 | 0.916  |
| 143 | pm5-pm10 | -0.119 | 0.009  | -0.13  | 0.006  | -0.12  | 0.009  |
| 144 | pm5-pm11 | 0.012  | 0.347  | -0.013 | 0.392  | 0.012  | 0.37   |
| 145 | pm5-pm12 | -0.051 | 0.02   | -0.047 | 0.185  | -0.044 | 0.161  |
| 146 | pm5-pm13 | -0.006 | 0.424  | -0.008 | 0.55   | -0.032 | 0.249  |
| 147 | pm5-pm14 | -0.012 | 0.317  | 0.033  | 0.23   | 0.029  | 0.235  |
| 148 | pm5-pm15 | -0.003 | 0.849  | -0.012 | 0.369  | -0.018 | 0.353  |
| 149 | pm5-pm16 | 0.011  | 0.382  | 0.024  | 0.255  | 0.002  | 0.637  |
| 150 | pm5-pm17 | 0.015  | 0.302  | 0.046  | 0.154  | 0.016  | 0.375  |
| 151 | pm5-pm18 | 0.027  | 0.286  | -0.012 | 0.347  | 0.004  | 0.84   |
| 152 | pm5-pm19 | -0.003 | 0.927  | 0.017  | 0.33   | -0.001 | 0.772  |
| 153 | pm5-pm20 | -0.007 | 0.511  | -0.004 | 0.827  | -0.036 | 0.216  |
| 154 | pm5-pm21 | -0.112 | 0.009  | -0.086 | 0.013  | -0.109 | 0.007  |
| 155 | pm5-pm22 | -0.154 | 0.003  | -0.158 | 0.004  | -0.149 | 0.006  |
| 156 | pm5-pm23 | 0.011  | 0.349  | 0.035  | 0.283  | 0.036  | 0.206  |
| 157 | pm5-pm24 | 0.002  | 0.836  | 0.014  | 0.314  | -0.025 | 0.229  |

|     |          |        |        |        |        |        |        |
|-----|----------|--------|--------|--------|--------|--------|--------|
| 158 | pm5-pm25 | -0.024 | 0.269  | 0.022  | 0.221  | -0.013 | 0.357  |
| 159 | pm5-pm26 | 0.001  | 0.77   | -0.001 | 0.876  | 0.01   | 0.341  |
| 160 | pm5-pm27 | -0.015 | 0.306  | -0.018 | 0.354  | 0.011  | 0.397  |
| 161 | pm5-pm28 | -0.168 | 0.005  | -0.167 | 0.002  | -0.194 | 0.003  |
| 162 | pm5-pm29 | -0.024 | 0.204  | -0.003 | 0.951  | -0.031 | 0.288  |
| 163 | pm5-pm30 | -0.042 | 0.167  | -0.015 | 0.317  | -0.028 | 0.208  |
| 164 | pm5-pm31 | 0.018  | 0.317  | 0.033  | 0.256  | 0.025  | 0.225  |
| 165 | pm5-pm32 | -0.005 | 0.948  | -0.022 | 0.24   | -0.019 | 0.359  |
| 166 | pm5-pm33 | -0.014 | 0.307  | 0.002  | 0.712  | 0.028  | 0.226  |
| 167 | pm5-pm34 | 0.031  | 0.222  | 0.017  | 0.37   | 0.023  | 0.28   |
| 168 | pm5-pm35 | -0.013 | 0.397  | 0.008  | 0.545  | 0.024  | 0.235  |
| 169 | pm5-pm36 | -0.018 | 0.37   | -0.024 | 0.224  | 0.02   | 0.358  |
| 170 | pm5-pm37 | 0.017  | 0.374  | 0      | 0.67   | 0.028  | 0.291  |
| 171 | pm6-pm7  | -0.014 | 0.317  | -0.038 | 0.211  | -0.025 | 0.282  |
| 172 | pm6-pm8  | 0.016  | 0.373  | 0.014  | 0.393  | 0.018  | 0.378  |
| 173 | pm6-pm9  | 0.018  | 0.332  | 0.025  | 0.287  | 0.005  | 0.607  |
| 174 | pm6-pm10 | 0.196  | 0.004  | 0.211  | <0.001 | 0.185  | 0.002  |
| 175 | pm6-pm11 | 0.031  | 0.251  | 0.013  | 0.359  | -0.004 | 0.867  |
| 176 | pm6-pm12 | -0.092 | 0.012  | -0.052 | 0.04   | -0.056 | 0.03   |
| 177 | pm6-pm13 | 0.011  | 0.302  | -0.02  | 0.3    | 0.001  | 0.617  |
| 178 | pm6-pm14 | 0.007  | 0.484  | 0.009  | 0.486  | 0.039  | 0.299  |
| 179 | pm6-pm15 | 0.004  | 0.986  | 0.036  | 0.21   | -0.006 | 0.478  |
| 180 | pm6-pm16 | 0.014  | 0.377  | -0.487 | <0.001 | -0.473 | <0.001 |
| 181 | pm6-pm17 | 0.026  | 0.279  | 0.041  | 0.184  | 0.03   | 0.223  |
| 182 | pm6-pm18 | -0.46  | <0.001 | -0.486 | <0.001 | -0.464 | <0.001 |
| 183 | pm6-pm19 | 0.023  | 0.286  | 0.004  | 0.672  | 0.025  | 0.24   |
| 184 | pm6-pm20 | -0.268 | <0.001 | -0.253 | <0.001 | -0.274 | <0.001 |
| 185 | pm6-pm21 | -0.083 | 0.012  | -0.121 | 0.01   | -0.105 | 0.008  |
| 186 | pm6-pm22 | -0.436 | <0.001 | -0.441 | <0.001 | -0.485 | <0.001 |
| 187 | pm6-pm23 | 0.01   | 0.32   | 0.028  | 0.202  | 0.003  | 0.653  |

|     |          |        |        |        |        |        |        |
|-----|----------|--------|--------|--------|--------|--------|--------|
| 188 | pm6-pm24 | 0.028  | 0.241  | 0.03   | 0.217  | 0.009  | 0.55   |
| 189 | pm6-pm25 | 0.01   | 0.506  | -0.002 | 0.768  | 0.021  | 0.216  |
| 190 | pm6-pm26 | 0.01   | 0.322  | 0.004  | 0.643  | 0.026  | 0.229  |
| 191 | pm6-pm27 | -0.226 | <0.001 | -0.214 | <0.001 | -0.194 | 0.001  |
| 192 | pm6-pm28 | -0.202 | <0.001 | -0.237 | <0.001 | -0.232 | <0.001 |
| 193 | pm6-pm29 | -0.028 | 0.264  | -0.014 | 0.358  | -0.011 | 0.311  |
| 194 | pm6-pm30 | -0.027 | 0.29   | -0.037 | 0.212  | -0.003 | 0.61   |
| 195 | pm6-pm31 | -0.249 | <0.001 | -0.248 | <0.001 | -0.254 | <0.001 |
| 196 | pm6-pm32 | -0.263 | <0.001 | -0.243 | <0.001 | -0.259 | <0.001 |
| 197 | pm6-pm33 | -0.285 | <0.001 | -0.262 | <0.001 | -0.262 | <0.001 |
| 198 | pm6-pm34 | 0.014  | 0.338  | -0.173 | 0.004  | 0.049  | 0.178  |
| 199 | pm6-pm35 | -0.02  | 0.287  | 0.017  | 0.341  | -0.01  | 0.376  |
| 200 | pm6-pm36 | 0.034  | 0.293  | 0.034  | 0.245  | 0.038  | 0.285  |
| 201 | pm6-pm37 | -0.035 | 0.281  | -0.043 | 0.166  | -0.044 | 0.198  |
| 202 | pm7-pm8  | -0.015 | 0.327  | -0.03  | 0.238  | -0.036 | 0.226  |
| 203 | pm7-pm9  | 0.005  | 0.497  | -0.022 | 0.274  | 0.007  | 0.515  |
| 204 | pm7-pm10 | 0.482  | <0.001 | 0.463  | <0.001 | 0.454  | <0.001 |
| 205 | pm7-pm11 | -0.082 | 0.019  | -0.054 | 0.027  | -0.066 | 0.025  |
| 206 | pm7-pm12 | -0.048 | 0.183  | -0.057 | 0.023  | -0.059 | 0.02   |
| 207 | pm7-pm13 | -0.056 | 0.043  | -0.076 | 0.018  | -0.077 | 0.018  |
| 208 | pm7-pm14 | 0.004  | 0.958  | 0.007  | 0.452  | -0.019 | 0.352  |
| 209 | pm7-pm15 | -0.023 | 0.203  | -0.029 | 0.216  | -0.033 | 0.292  |
| 210 | pm7-pm16 | 0      | 0.717  | -0.002 | 0.721  | -0.03  | 0.264  |
| 211 | pm7-pm17 | 0.021  | 0.262  | -0.009 | 0.538  | 0.013  | 0.341  |
| 212 | pm7-pm18 | -0.041 | 0.165  | -0.045 | 0.188  | -0.043 | 0.158  |
| 213 | pm7-pm19 | -0.043 | 0.173  | -0.067 | 0.022  | -0.033 | 0.257  |
| 214 | pm7-pm20 | -0.019 | 0.376  | 0.009  | 0.437  | -0.014 | 0.335  |
| 215 | pm7-pm21 | -0.074 | 0.014  | -0.06  | 0.03   | -0.072 | 0.015  |
| 216 | pm7-pm22 | -0.132 | 0.006  | -0.162 | 0.004  | -0.149 | 0.009  |
| 217 | pm7-pm23 | 0.009  | 0.429  | 0.001  | 0.765  | 0.012  | 0.347  |

|     |          |        |        |        |        |        |        |
|-----|----------|--------|--------|--------|--------|--------|--------|
| 218 | pm7-pm24 | -0.031 | 0.27   | -0.014 | 0.349  | -0.014 | 0.341  |
| 219 | pm7-pm25 | -0.044 | 0.194  | -0.057 | 0.035  | -0.025 | 0.2    |
| 220 | pm7-pm26 | -0.004 | 0.667  | -0.008 | 0.451  | -0.009 | 0.588  |
| 221 | pm7-pm27 | 0.001  | 0.924  | -0.029 | 0.248  | -0.007 | 0.598  |
| 222 | pm7-pm28 | -0.431 | <0.001 | -0.461 | <0.001 | -0.464 | <0.001 |
| 223 | pm7-pm29 | -0.131 | 0.007  | -0.137 | 0.008  | -0.124 | 0.009  |
| 224 | pm7-pm30 | 0.09   | 0.019  | 0.078  | 0.015  | 0.079  | 0.011  |
| 225 | pm7-pm31 | -0.02  | 0.323  | -0.023 | 0.291  | -0.031 | 0.295  |
| 226 | pm7-pm32 | -0.061 | 0.04   | -0.035 | 0.29   | -0.064 | 0.037  |
| 227 | pm7-pm33 | -0.054 | 0.021  | -0.027 | 0.266  | -0.069 | 0.029  |
| 228 | pm7-pm34 | -0.044 | 0.176  | -0.078 | 0.01   | -0.041 | 0.163  |
| 229 | pm7-pm35 | -0.042 | 0.169  | -0.038 | 0.208  | -0.004 | 0.836  |
| 230 | pm7-pm36 | -0.043 | 0.183  | -0.022 | 0.244  | -0.035 | 0.286  |
| 231 | pm7-pm37 | -0.034 | 0.221  | -0.056 | 0.031  | -0.05  | 0.043  |
| 232 | pm8-pm9  | -0.027 | 0.208  | -0.015 | 0.324  | -0.014 | 0.309  |
| 233 | pm8-pm10 | 0.097  | 0.015  | 0.108  | 0.010  | 0.12   | 0.009  |
| 234 | pm8-pm11 | -0.018 | 0.307  | 0.021  | 0.298  | -0.014 | 0.39   |
| 235 | pm8-pm12 | -0.069 | 0.022  | -0.098 | 0.015  | -0.069 | 0.025  |
| 236 | pm8-pm13 | -0.003 | 0.772  | -0.028 | 0.2    | -0.009 | 0.498  |
| 237 | pm8-pm14 | 0.003  | 0.906  | -0.029 | 0.257  | 0.018  | 0.384  |
| 238 | pm8-pm15 | 0.03   | 0.25   | 0.012  | 0.378  | 0.033  | 0.255  |
| 239 | pm8-pm16 | -0.004 | 0.887  | 0.005  | 0.971  | -0.011 | 0.392  |
| 240 | pm8-pm17 | 0.019  | 0.392  | -0.019 | 0.376  | 0.011  | 0.349  |
| 241 | pm8-pm18 | -0.015 | 0.374  | -0.02  | 0.307  | -0.008 | 0.583  |
| 242 | pm8-pm19 | 0.026  | 0.228  | 0.026  | 0.296  | -0.013 | 0.315  |
| 243 | pm8-pm20 | 0.005  | 0.507  | 0.018  | 0.362  | -0.002 | 0.687  |
| 244 | pm8-pm21 | -0.086 | 0.017  | -0.092 | 0.017  | -0.089 | 0.016  |
| 245 | pm8-pm22 | -0.372 | <0.001 | -0.362 | <0.001 | -0.373 | <0.001 |
| 246 | pm8-pm23 | 0.011  | 0.329  | 0.017  | 0.346  | -0.017 | 0.334  |
| 247 | pm8-pm24 | -0.009 | 0.521  | -0.029 | 0.254  | 0.009  | 0.438  |

|     |          |        |        |        |        |        |        |
|-----|----------|--------|--------|--------|--------|--------|--------|
| 248 | pm8-pm25 | -0.018 | 0.35   | 0.013  | 0.349  | 0.018  | 0.373  |
| 249 | pm8-pm26 | 0.015  | 0.305  | -0.001 | 0.873  | -0.007 | 0.581  |
| 250 | pm8-pm27 | 0.013  | 0.364  | 0.014  | 0.308  | -0.025 | 0.258  |
| 251 | pm8-pm28 | -0.468 | <0.001 | -0.477 | <0.001 | -0.448 | <0.001 |
| 252 | pm8-pm29 | 0.005  | 0.671  | 0.016  | 0.305  | -0.006 | 0.441  |
| 253 | pm8-pm30 | 0.015  | 0.324  | -0.03  | 0.222  | -0.005 | 0.672  |
| 254 | pm8-pm31 | 0.003  | 0.644  | -0.022 | 0.211  | 0.01   | 0.37   |
| 255 | pm8-pm32 | -0.011 | 0.346  | 0.006  | 0.544  | 0.013  | 0.36   |
| 256 | pm8-pm33 | 0.021  | 0.283  | 0.012  | 0.345  | 0.03   | 0.298  |
| 257 | pm8-pm34 | -0.011 | 0.336  | -0.005 | 0.491  | -0.008 | 0.428  |
| 258 | pm8-pm35 | -0.009 | 0.452  | -0.005 | 0.535  | 0.006  | 0.545  |
| 259 | pm8-pm36 | -0.011 | 0.305  | -0.001 | 0.775  | 0.013  | 0.388  |
| 260 | pm8-pm37 | -0.007 | 0.507  | -0.014 | 0.335  | 0.024  | 0.218  |
| 261 | pm9-pm10 | 0.113  | 0.009  | 0.098  | 0.018  | 0.115  | 0.007  |
| 262 | pm9-pm11 | 0.021  | 0.293  | 0.01   | 0.358  | -0.006 | 0.553  |
| 263 | pm9-pm12 | -0.041 | 0.161  | -0.054 | 0.034  | -0.02  | 0.343  |
| 264 | pm9-pm13 | -0.017 | 0.396  | -0.002 | 0.898  | -0.004 | 0.987  |
| 265 | pm9-pm14 | 0.042  | 0.188  | 0.012  | 0.328  | -0.003 | 0.937  |
| 266 | pm9-pm15 | 0.012  | 0.392  | 0      | 0.967  | 0.007  | 0.555  |
| 267 | pm9-pm16 | -0.063 | 0.021  | -0.076 | 0.018  | -0.081 | 0.015  |
| 268 | pm9-pm17 | 0.01   | 0.556  | -0.013 | 0.371  | -0.001 | 0.617  |
| 269 | pm9-pm18 | 0.019  | 0.328  | 0.021  | 0.223  | 0.017  | 0.333  |
| 270 | pm9-pm19 | -0.022 | 0.23   | 0.014  | 0.361  | 0.006  | 0.578  |
| 271 | pm9-pm20 | -0.012 | 0.34   | -0.022 | 0.299  | 0.022  | 0.282  |
| 272 | pm9-pm21 | -0.076 | 0.019  | -0.119 | 0.005  | -0.078 | 0.011  |
| 273 | pm9-pm22 | -0.041 | 0.176  | -0.054 | 0.039  | -0.058 | 0.023  |
| 274 | pm9-pm23 | 0.004  | 0.626  | 0.027  | 0.213  | 0.041  | 0.163  |
| 275 | pm9-pm24 | -0.47  | <0.001 | -0.487 | <0.001 | -0.465 | <0.001 |
| 276 | pm9-pm25 | 0.022  | 0.274  | 0.021  | 0.274  | 0.035  | 0.204  |
| 277 | pm9-pm26 | -0.01  | 0.387  | 0.001  | 0.899  | 0.003  | 0.625  |

|     |           |        |        |        |       |        |       |
|-----|-----------|--------|--------|--------|-------|--------|-------|
| 278 | pm9-pm27  | -0.021 | 0.239  | -0.002 | 0.825 | 0.012  | 0.315 |
| 279 | pm9-pm28  | -0.039 | 0.224  | -0.037 | 0.24  | -0.045 | 0.17  |
| 280 | pm9-pm29  | -0.016 | 0.333  | -0.035 | 0.261 | -0.034 | 0.249 |
| 281 | pm9-pm30  | -0.03  | 0.261  | -0.006 | 0.517 | -0.031 | 0.239 |
| 282 | pm9-pm31  | 0.029  | 0.282  | 0.021  | 0.284 | 0.021  | 0.209 |
| 283 | pm9-pm32  | 0.006  | 0.477  | 0.03   | 0.218 | 0.016  | 0.397 |
| 284 | pm9-pm33  | 0.016  | 0.366  | -0.017 | 0.369 | 0.028  | 0.289 |
| 285 | pm9-pm34  | 0.002  | 0.669  | 0.033  | 0.242 | 0.018  | 0.318 |
| 286 | pm9-pm35  | 0.024  | 0.238  | 0.001  | 0.779 | -0.003 | 0.73  |
| 287 | pm9-pm36  | 0.012  | 0.343  | 0.028  | 0.218 | 0.011  | 0.36  |
| 288 | pm9-pm37  | 0.009  | 0.464  | -0.002 | 0.828 | -0.012 | 0.359 |
| 289 | pm10-pm11 | 0.149  | 0.005  | 0.163  | 0.002 | 0.169  | 0.004 |
| 290 | pm10-pm12 | -0.136 | 0.009  | -0.157 | 0.003 | -0.141 | 0.007 |
| 291 | pm10-pm13 | 0.119  | 0.007  | 0.107  | 0.005 | 0.128  | 0.009 |
| 292 | pm10-pm14 | 0.091  | 0.013  | 0.093  | 0.011 | 0.108  | 0.009 |
| 293 | pm10-pm15 | 0.065  | 0.026  | 0.071  | 0.013 | 0.07   | 0.032 |
| 294 | pm10-pm16 | -0.143 | 0.006  | -0.142 | 0.007 | -0.149 | 0.01  |
| 295 | pm10-pm17 | 0.091  | 0.014  | 0.084  | 0.010 | 0.082  | 0.018 |
| 296 | pm10-pm18 | -0.17  | 0.003  | -0.176 | 0.001 | -0.145 | 0.009 |
| 297 | pm10-pm19 | 0.09   | 0.019  | 0.086  | 0.014 | 0.104  | 0.010 |
| 298 | pm10-pm20 | 0.092  | 0.012  | 0.091  | 0.014 | 0.105  | 0.006 |
| 299 | pm10-pm21 | -0.182 | 0.004  | -0.151 | 0.002 | -0.158 | 0.003 |
| 300 | pm10-pm22 | -0.146 | 0.008  | -0.157 | 0.003 | -0.152 | 0.002 |
| 301 | pm10-pm23 | -0.082 | 0.02   | -0.107 | 0.01  | -0.093 | 0.015 |
| 302 | pm10-pm24 | 0.048  | 0.2    | 0.029  | 0.214 | 0.016  | 0.339 |
| 303 | pm10-pm25 | -0.128 | 0.006  | -0.118 | 0.006 | -0.14  | 0.008 |
| 304 | pm10-pm26 | 0.066  | 0.031  | 0.068  | 0.031 | 0.073  | 0.011 |
| 305 | pm10-pm27 | -0.099 | 0.014  | -0.142 | 0.009 | -0.128 | 0.005 |
| 306 | pm10-pm28 | -0.165 | 0.002  | -0.159 | 0.001 | -0.131 | 0.008 |
| 307 | pm10-pm29 | -0.258 | <0.001 | -0.18  | 0.005 | -0.182 | 0.002 |

|     |           |        |        |        |        |        |        |
|-----|-----------|--------|--------|--------|--------|--------|--------|
| 308 | pm10-pm30 | 0.118  | 0.008  | 0.112  | 0.006  | 0.138  | 0.008  |
| 309 | pm10-pm31 | -0.11  | 0.007  | -0.141 | 0.01   | -0.114 | 0.006  |
| 310 | pm10-pm32 | 0.08   | 0.014  | 0.09   | 0.015  | 0.081  | 0.017  |
| 311 | pm10-pm33 | 0.057  | 0.029  | 0.066  | 0.026  | 0.058  | 0.029  |
| 312 | pm10-pm34 | 0.171  | 0.003  | 0.165  | 0.004  | 0.185  | 0.004  |
| 313 | pm10-pm35 | 0.109  | 0.009  | 0.109  | 0.007  | 0.094  | 0.015  |
| 314 | pm10-pm36 | 0.054  | 0.039  | 0.054  | 0.037  | 0.068  | 0.039  |
| 315 | pm10-pm37 | 0.319  | <0.001 | 0.33   | <0.001 | 0.331  | <0.001 |
| 316 | pm11-pm12 | -0.071 | 0.014  | -0.051 | 0.025  | -0.093 | 0.012  |
| 317 | pm11-pm13 | -0.034 | 0.291  | -0.024 | 0.29   | -0.026 | 0.246  |
| 318 | pm11-pm14 | 0.017  | 0.36   | 0.024  | 0.244  | 0.038  | 0.255  |
| 319 | pm11-pm15 | -0.021 | 0.21   | -0.008 | 0.421  | -0.004 | 0.826  |
| 320 | pm11-pm16 | 0.018  | 0.324  | 0.005  | 0.677  | 0.02   | 0.371  |
| 321 | pm11-pm17 | -0.035 | 0.278  | -0.009 | 0.584  | -0.009 | 0.438  |
| 322 | pm11-pm18 | -0.002 | 0.966  | 0.004  | 0.925  | -0.01  | 0.321  |
| 323 | pm11-pm19 | -0.031 | 0.247  | -0.031 | 0.204  | -0.012 | 0.375  |
| 324 | pm11-pm20 | -0.017 | 0.341  | -0.023 | 0.239  | -0.011 | 0.393  |
| 325 | pm11-pm21 | -0.133 | 0.006  | -0.121 | 0.009  | -0.129 | 0.006  |
| 326 | pm11-pm22 | -0.004 | 0.981  | 0.004  | 0.771  | 0.022  | 0.201  |
| 327 | pm11-pm23 | 0.023  | 0.205  | 0.011  | 0.32   | 0.012  | 0.309  |
| 328 | pm11-pm24 | -0.018 | 0.34   | 0.02   | 0.216  | -0.012 | 0.334  |
| 329 | pm11-pm25 | 0.024  | 0.291  | -0.001 | 0.682  | -0.019 | 0.376  |
| 330 | pm11-pm26 | -0.011 | 0.306  | -0.03  | 0.288  | -0.015 | 0.354  |
| 331 | pm11-pm27 | 0.013  | 0.366  | 0.001  | 0.63   | 0.003  | 0.616  |
| 332 | pm11-pm28 | -0.255 | <0.001 | -0.222 | <0.001 | -0.235 | <0.001 |
| 333 | pm11-pm29 | 0.004  | 0.995  | -0.01  | 0.404  | -0.018 | 0.377  |
| 334 | pm11-pm30 | -0.005 | 0.969  | -0.038 | 0.236  | -0.032 | 0.291  |
| 335 | pm11-pm31 | 0.039  | 0.207  | 0.027  | 0.207  | 0.012  | 0.354  |
| 336 | pm11-pm32 | -0.01  | 0.443  | -0.025 | 0.277  | 0.015  | 0.306  |
| 337 | pm11-pm33 | -0.016 | 0.39   | 0.028  | 0.24   | 0.011  | 0.312  |



|     |           |        |       |        |       |        |       |
|-----|-----------|--------|-------|--------|-------|--------|-------|
| 338 | pm11-pm34 | 0.015  | 0.334 | -0.018 | 0.332 | 0.008  | 0.453 |
| 339 | pm11-pm35 | -0.001 | 0.695 | -0.004 | 0.881 | 0.002  | 0.725 |
| 340 | pm11-pm36 | 0.004  | 0.995 | 0.013  | 0.381 | 0.007  | 0.423 |
| 341 | pm11-pm37 | -0.02  | 0.217 | 0.009  | 0.473 | -0.012 | 0.393 |
| 342 | pm12-pm13 | -0.081 | 0.015 | -0.087 | 0.011 | -0.079 | 0.013 |
| 343 | pm12-pm14 | -0.09  | 0.01  | -0.076 | 0.014 | -0.07  | 0.039 |
| 344 | pm12-pm15 | -0.094 | 0.013 | -0.091 | 0.016 | -0.068 | 0.02  |
| 345 | pm12-pm16 | -0.064 | 0.039 | -0.066 | 0.038 | -0.03  | 0.267 |
| 346 | pm12-pm17 | -0.082 | 0.018 | -0.08  | 0.013 | -0.105 | 0.01  |
| 347 | pm12-pm18 | -0.065 | 0.039 | -0.069 | 0.028 | -0.098 | 0.011 |
| 348 | pm12-pm19 | -0.105 | 0.007 | -0.093 | 0.014 | -0.068 | 0.031 |
| 349 | pm12-pm20 | -0.082 | 0.012 | -0.032 | 0.296 | -0.052 | 0.038 |
| 350 | pm12-pm21 | -0.154 | 0.003 | -0.116 | 0.007 | -0.132 | 0.009 |
| 351 | pm12-pm22 | -0.043 | 0.195 | -0.046 | 0.169 | -0.054 | 0.033 |
| 352 | pm12-pm23 | -0.049 | 0.162 | -0.046 | 0.168 | -0.052 | 0.039 |
| 353 | pm12-pm24 | -0.086 | 0.013 | -0.105 | 0.006 | -0.097 | 0.011 |
| 354 | pm12-pm25 | -0.059 | 0.04  | -0.058 | 0.03  | -0.092 | 0.011 |
| 355 | pm12-pm26 | -0.055 | 0.039 | -0.051 | 0.044 | -0.077 | 0.011 |
| 356 | pm12-pm27 | -0.091 | 0.012 | -0.104 | 0.008 | -0.067 | 0.043 |
| 357 | pm12-pm28 | 0.006  | 0.413 | 0.019  | 0.334 | 0.021  | 0.262 |
| 358 | pm12-pm29 | -0.058 | 0.031 | -0.069 | 0.027 | -0.048 | 0.165 |
| 359 | pm12-pm30 | -0.061 | 0.026 | -0.057 | 0.039 | -0.096 | 0.019 |
| 360 | pm12-pm31 | -0.038 | 0.252 | -0.043 | 0.166 | -0.064 | 0.036 |
| 361 | pm12-pm32 | -0.055 | 0.024 | -0.079 | 0.01  | -0.083 | 0.019 |
| 362 | pm12-pm33 | -0.109 | 0.008 | -0.072 | 0.011 | -0.107 | 0.009 |
| 363 | pm12-pm34 | -0.029 | 0.248 | -0.045 | 0.191 | -0.065 | 0.032 |
| 364 | pm12-pm35 | -0.082 | 0.013 | -0.096 | 0.019 | -0.108 | 0.008 |
| 365 | pm12-pm36 | -0.065 | 0.035 | -0.071 | 0.017 | -0.062 | 0.033 |
| 366 | pm12-pm37 | -0.051 | 0.033 | -0.079 | 0.016 | -0.072 | 0.019 |
| 367 | pm13-pm14 | 0.004  | 0.754 | 0.008  | 0.536 | 0.017  | 0.39  |

|     |           |        |        |        |        |        |        |
|-----|-----------|--------|--------|--------|--------|--------|--------|
| 368 | pm13-pm15 | -0.03  | 0.256  | -0.036 | 0.291  | 0      | 0.959  |
| 369 | pm13-pm16 | -0.022 | 0.246  | -0.008 | 0.569  | -0.015 | 0.399  |
| 370 | pm13-pm17 | -0.012 | 0.335  | -0.04  | 0.153  | -0.017 | 0.328  |
| 371 | pm13-pm18 | -0.022 | 0.218  | -0.01  | 0.414  | 0.012  | 0.345  |
| 372 | pm13-pm19 | -0.012 | 0.33   | -0.013 | 0.377  | -0.017 | 0.304  |
| 373 | pm13-pm20 | 0.022  | 0.202  | 0.016  | 0.353  | -0.016 | 0.363  |
| 374 | pm13-pm21 | -0.106 | 0.008  | -0.127 | 0.007  | -0.142 | 0.008  |
| 375 | pm13-pm22 | -0.031 | 0.267  | -0.032 | 0.247  | -0.009 | 0.552  |
| 376 | pm13-pm23 | 0.005  | 0.932  | 0.014  | 0.379  | 0.027  | 0.272  |
| 377 | pm13-pm24 | -0.028 | 0.252  | -0.031 | 0.266  | -0.023 | 0.278  |
| 378 | pm13-pm25 | -0.013 | 0.325  | -0.03  | 0.282  | -0.026 | 0.252  |
| 379 | pm13-pm26 | -0.005 | 0.775  | -0.013 | 0.308  | -0.007 | 0.59   |
| 380 | pm13-pm27 | -0.029 | 0.209  | -0.03  | 0.279  | -0.05  | 0.154  |
| 381 | pm13-pm28 | -0.25  | <0.001 | -0.251 | <0.001 | -0.281 | <0.001 |
| 382 | pm13-pm29 | -0.047 | 0.159  | -0.032 | 0.238  | -0.051 | 0.029  |
| 383 | pm13-pm30 | -0.038 | 0.253  | -0.029 | 0.252  | -0.054 | 0.035  |
| 384 | pm13-pm31 | -0.023 | 0.268  | -0.007 | 0.411  | -0.021 | 0.204  |
| 385 | pm13-pm32 | -0.026 | 0.214  | -0.026 | 0.25   | -0.003 | 0.72   |
| 386 | pm13-pm33 | 0.034  | 0.254  | 0.022  | 0.254  | 0.015  | 0.397  |
| 387 | pm13-pm34 | 0.014  | 0.384  | -0.008 | 0.466  | -0.02  | 0.291  |
| 388 | pm13-pm35 | -0.038 | 0.28   | -0.069 | 0.037  | -0.038 | 0.249  |
| 389 | pm13-pm36 | -0.009 | 0.494  | -0.011 | 0.352  | -0.005 | 0.553  |
| 390 | pm13-pm37 | 0.009  | 0.403  | -0.006 | 0.503  | 0.005  | 0.858  |
| 391 | pm14-pm15 | 0.002  | 0.671  | 0.003  | 0.981  | -0.01  | 0.495  |
| 392 | pm14-pm16 | -0.031 | 0.286  | -0.011 | 0.378  | -0.001 | 0.628  |
| 393 | pm14-pm17 | -0.008 | 0.5    | -0.026 | 0.215  | 0.003  | 0.703  |
| 394 | pm14-pm18 | 0.034  | 0.222  | -0.002 | 0.965  | 0.009  | 0.587  |
| 395 | pm14-pm19 | -0.003 | 0.86   | 0.027  | 0.222  | 0.032  | 0.264  |
| 396 | pm14-pm20 | 0.013  | 0.356  | 0.011  | 0.389  | -0.02  | 0.328  |
| 397 | pm14-pm21 | -0.127 | 0.006  | -0.132 | 0.009  | -0.123 | 0.01   |

|     |           |        |        |        |        |        |        |
|-----|-----------|--------|--------|--------|--------|--------|--------|
| 398 | pm14-pm22 | -0.496 | <0.001 | -0.477 | <0.001 | -0.46  | <0.001 |
| 399 | pm14-pm23 | 0.014  | 0.345  | 0.033  | 0.223  | 0.002  | 0.699  |
| 400 | pm14-pm24 | -0.007 | 0.561  | 0.015  | 0.38   | 0.001  | 0.739  |
| 401 | pm14-pm25 | -0.015 | 0.311  | 0.021  | 0.211  | 0.01   | 0.334  |
| 402 | pm14-pm26 | 0.029  | 0.226  | -0.01  | 0.443  | 0.028  | 0.294  |
| 403 | pm14-pm27 | -0.013 | 0.324  | -0.013 | 0.303  | -0.006 | 0.46   |
| 404 | pm14-pm28 | -0.43  | <0.001 | -0.449 | <0.001 | -0.427 | <0.001 |
| 405 | pm14-pm29 | -0.042 | 0.162  | -0.063 | 0.037  | -0.05  | 0.026  |
| 406 | pm14-pm30 | -0.051 | 0.026  | -0.018 | 0.4    | -0.052 | 0.035  |
| 407 | pm14-pm31 | 0.001  | 0.998  | 0.037  | 0.233  | 0.027  | 0.297  |
| 408 | pm14-pm32 | 0.01   | 0.491  | -0.004 | 0.786  | -0.01  | 0.54   |
| 409 | pm14-pm33 | -0.014 | 0.365  | -0.014 | 0.348  | -0.021 | 0.266  |
| 410 | pm14-pm34 | 0.007  | 0.465  | 0.003  | 0.663  | 0.016  | 0.364  |
| 411 | pm14-pm35 | -0.016 | 0.358  | -0.031 | 0.229  | -0.006 | 0.569  |
| 412 | pm14-pm36 | 0.029  | 0.28   | -0.016 | 0.365  | 0.007  | 0.429  |
| 413 | pm14-pm37 | -0.015 | 0.318  | 0.019  | 0.362  | -0.027 | 0.224  |
| 414 | pm15-pm16 | -0.283 | <0.001 | -0.258 | <0.001 | -0.266 | <0.001 |
| 415 | pm15-pm17 | 0.013  | 0.369  | 0.006  | 0.557  | 0.001  | 0.845  |
| 416 | pm15-pm18 | -0.003 | 0.763  | -0.014 | 0.318  | 0.003  | 0.653  |
| 417 | pm15-pm19 | 0.014  | 0.392  | -0.025 | 0.271  | 0.005  | 0.544  |
| 418 | pm15-pm20 | -0.022 | 0.23   | 0.02   | 0.283  | -0.007 | 0.444  |
| 419 | pm15-pm21 | -0.113 | 0.005  | -0.079 | 0.012  | -0.098 | 0.018  |
| 420 | pm15-pm22 | 0.028  | 0.234  | 0.038  | 0.283  | 0.006  | 0.569  |
| 421 | pm15-pm23 | -0.008 | 0.591  | 0.016  | 0.311  | 0.004  | 0.844  |
| 422 | pm15-pm24 | -0.029 | 0.273  | -0.002 | 0.741  | 0.005  | 0.599  |
| 423 | pm15-pm25 | -0.008 | 0.6    | -0.006 | 0.584  | 0.012  | 0.348  |
| 424 | pm15-pm26 | 0.015  | 0.345  | -0.016 | 0.335  | 0.011  | 0.37   |
| 425 | pm15-pm27 | -0.009 | 0.488  | -0.001 | 0.774  | -0.023 | 0.296  |
| 426 | pm15-pm28 | -0.465 | <0.001 | -0.464 | <0.001 | -0.434 | <0.001 |
| 427 | pm15-pm29 | -0.033 | 0.242  | -0.009 | 0.464  | 0.012  | 0.364  |

|     |           |        |        |        |        |        |        |
|-----|-----------|--------|--------|--------|--------|--------|--------|
| 428 | pm15-pm30 | -0.039 | 0.297  | -0.049 | 0.176  | -0.034 | 0.226  |
| 429 | pm15-pm31 | 0.015  | 0.336  | -0.015 | 0.311  | 0.008  | 0.513  |
| 430 | pm15-pm32 | -0.002 | 0.848  | 0.006  | 0.424  | -0.026 | 0.213  |
| 431 | pm15-pm33 | -0.046 | 0.185  | -0.01  | 0.37   | -0.012 | 0.325  |
| 432 | pm15-pm34 | 0.028  | 0.262  | 0.007  | 0.512  | -0.013 | 0.316  |
| 433 | pm15-pm35 | -0.025 | 0.296  | -0.022 | 0.225  | -0.027 | 0.219  |
| 434 | pm15-pm36 | -0.012 | 0.353  | -0.011 | 0.309  | 0.011  | 0.37   |
| 435 | pm15-pm37 | -0.014 | 0.379  | -0.025 | 0.231  | -0.015 | 0.318  |
| 436 | pm16-pm17 | -0.006 | 0.571  | -0.015 | 0.345  | 0      | 0.666  |
| 437 | pm16-pm18 | 0.013  | 0.343  | -0.011 | 0.337  | 0.007  | 0.419  |
| 438 | pm16-pm19 | 0.022  | 0.211  | 0.008  | 0.493  | 0.044  | 0.188  |
| 439 | pm16-pm20 | 0.013  | 0.397  | 0.021  | 0.219  | -0.001 | 0.628  |
| 440 | pm16-pm21 | -0.116 | 0.005  | -0.094 | 0.016  | -0.073 | 0.019  |
| 441 | pm16-pm22 | 0.024  | 0.263  | 0.017  | 0.397  | 0.014  | 0.335  |
| 442 | pm16-pm23 | 0.036  | 0.247  | 0.037  | 0.222  | 0.02   | 0.237  |
| 443 | pm16-pm24 | 0.018  | 0.319  | 0.001  | 0.916  | 0.022  | 0.295  |
| 444 | pm16-pm25 | 0.041  | 0.192  | 0.04   | 0.189  | 0.033  | 0.264  |
| 445 | pm16-pm26 | 0.01   | 0.558  | 0.046  | 0.164  | 0.019  | 0.378  |
| 446 | pm16-pm27 | 0.023  | 0.225  | 0.026  | 0.257  | 0.033  | 0.248  |
| 447 | pm16-pm28 | -0.479 | <0.001 | -0.447 | <0.001 | -0.442 | <0.001 |
| 448 | pm16-pm29 | -0.47  | <0.001 | -0.444 | <0.001 | -0.452 | <0.001 |
| 449 | pm16-pm30 | -0.021 | 0.219  | -0.033 | 0.282  | -0.019 | 0.395  |
| 450 | pm16-pm31 | -0.023 | 0.215  | -0.012 | 0.3    | -0.019 | 0.353  |
| 451 | pm16-pm32 | -0.011 | 0.317  | 0.003  | 0.763  | 0.012  | 0.374  |
| 452 | pm16-pm33 | -0.001 | 0.704  | -0.007 | 0.433  | -0.004 | 0.852  |
| 453 | pm16-pm34 | 0.034  | 0.241  | 0.008  | 0.423  | 0.004  | 0.659  |
| 454 | pm16-pm35 | -0.028 | 0.202  | -0.003 | 0.942  | -0.034 | 0.212  |
| 455 | pm16-pm36 | -0.015 | 0.345  | -0.017 | 0.359  | -0.004 | 0.761  |
| 456 | pm16-pm37 | 0.004  | 0.912  | -0.004 | 0.727  | -0.005 | 0.579  |
| 457 | pm17-pm18 | -0.021 | 0.218  | -0.008 | 0.465  | -0.007 | 0.48   |

|     |           |        |        |        |        |        |        |
|-----|-----------|--------|--------|--------|--------|--------|--------|
| 458 | pm17-pm19 | 0      | 0.785  | 0.019  | 0.349  | -0.013 | 0.387  |
| 459 | pm17-pm20 | -0.013 | 0.36   | -0.018 | 0.354  | -0.014 | 0.346  |
| 460 | pm17-pm21 | -0.121 | 0.009  | -0.106 | 0.009  | -0.116 | 0.008  |
| 461 | pm17-pm22 | -0.007 | 0.478  | -0.002 | 0.712  | -0.032 | 0.3    |
| 462 | pm17-pm23 | 0.011  | 0.381  | 0.006  | 0.465  | -0.008 | 0.437  |
| 463 | pm17-pm24 | 0.016  | 0.399  | -0.002 | 0.851  | 0.023  | 0.205  |
| 464 | pm17-pm25 | -0.008 | 0.42   | 0.026  | 0.246  | 0      | 0.833  |
| 465 | pm17-pm26 | -0.015 | 0.388  | 0.011  | 0.374  | -0.009 | 0.438  |
| 466 | pm17-pm27 | -0.022 | 0.292  | -0.033 | 0.247  | -0.006 | 0.54   |
| 467 | pm17-pm28 | -0.273 | <0.001 | -0.271 | <0.001 | -0.244 | <0.001 |
| 468 | pm17-pm29 | -0.029 | 0.206  | -0.032 | 0.297  | -0.061 | 0.033  |
| 469 | pm17-pm30 | -0.068 | 0.032  | -0.054 | 0.045  | -0.051 | 0.037  |
| 470 | pm17-pm31 | -0.033 | 0.22   | 0.01   | 0.307  | -0.001 | 0.892  |
| 471 | pm17-pm32 | -0.003 | 0.898  | -0.021 | 0.287  | 0.012  | 0.334  |
| 472 | pm17-pm33 | -0.001 | 0.902  | -0.004 | 0.946  | -0.019 | 0.347  |
| 473 | pm17-pm34 | -0.05  | 0.171  | -0.013 | 0.369  | -0.041 | 0.155  |
| 474 | pm17-pm35 | -0.005 | 0.573  | -0.019 | 0.368  | 0.013  | 0.304  |
| 475 | pm17-pm36 | -0.011 | 0.341  | 0.016  | 0.314  | 0.028  | 0.204  |
| 476 | pm17-pm37 | -0.02  | 0.316  | -0.028 | 0.254  | -0.008 | 0.527  |
| 477 | pm18-pm19 | 0.013  | 0.304  | -0.009 | 0.517  | -0.023 | 0.202  |
| 478 | pm18-pm20 | 0.021  | 0.229  | -0.022 | 0.288  | -0.011 | 0.329  |
| 479 | pm18-pm21 | -0.134 | 0.008  | -0.103 | 0.007  | -0.12  | 0.009  |
| 480 | pm18-pm22 | -0.01  | 0.321  | 0.034  | 0.288  | -0.014 | 0.331  |
| 481 | pm18-pm23 | -0.26  | <0.001 | -0.221 | <0.001 | -0.222 | <0.001 |
| 482 | pm18-pm24 | 0.004  | 0.611  | -0.011 | 0.33   | -0.025 | 0.287  |
| 483 | pm18-pm25 | 0.019  | 0.347  | 0.008  | 0.571  | -0.022 | 0.224  |
| 484 | pm18-pm26 | -0.021 | 0.218  | -0.01  | 0.565  | 0.024  | 0.29   |
| 485 | pm18-pm27 | -0.022 | 0.296  | -0.015 | 0.374  | -0.026 | 0.247  |
| 486 | pm18-pm28 | -0.466 | <0.001 | -0.429 | <0.001 | -0.465 | <0.001 |
| 487 | pm18-pm29 | -0.018 | 0.343  | 0.008  | 0.556  | -0.033 | 0.25   |

|     |           |        |        |        |        |        |        |
|-----|-----------|--------|--------|--------|--------|--------|--------|
| 488 | pm18-pm30 | 0.009  | 0.555  | -0.038 | 0.283  | -0.027 | 0.274  |
| 489 | pm18-pm31 | 0.04   | 0.159  | 0.006  | 0.583  | 0.023  | 0.233  |
| 490 | pm18-pm32 | -0.009 | 0.495  | 0.019  | 0.345  | -0.008 | 0.592  |
| 491 | pm18-pm33 | 0.002  | 0.841  | 0.023  | 0.28   | 0.016  | 0.311  |
| 492 | pm18-pm34 | 0.001  | 0.929  | 0      | 0.66   | 0.04   | 0.259  |
| 493 | pm18-pm35 | 0.004  | 0.902  | -0.021 | 0.277  | -0.029 | 0.205  |
| 494 | pm18-pm36 | -0.02  | 0.32   | -0.018 | 0.368  | -0.012 | 0.363  |
| 495 | pm18-pm37 | 0.005  | 0.514  | 0.015  | 0.364  | -0.007 | 0.511  |
| 496 | pm19-pm20 | -0.006 | 0.464  | 0.017  | 0.363  | -0.011 | 0.393  |
| 497 | pm19-pm21 | -0.125 | 0.008  | -0.087 | 0.014  | -0.123 | 0.01   |
| 498 | pm19-pm22 | 0.003  | 0.721  | -0.003 | 0.797  | -0.003 | 0.995  |
| 499 | pm19-pm23 | -0.001 | 0.9    | 0.036  | 0.271  | 0.012  | 0.342  |
| 500 | pm19-pm24 | -0.014 | 0.314  | 0.005  | 0.468  | -0.013 | 0.363  |
| 501 | pm19-pm25 | -0.023 | 0.286  | 0      | 0.945  | 0.011  | 0.315  |
| 502 | pm19-pm26 | 0.01   | 0.525  | -0.021 | 0.272  | 0.01   | 0.304  |
| 503 | pm19-pm27 | 0.01   | 0.326  | 0.004  | 0.877  | -0.001 | 0.72   |
| 504 | pm19-pm28 | -0.44  | <0.001 | -0.442 | <0.001 | -0.481 | <0.001 |
| 505 | pm19-pm29 | -0.014 | 0.393  | 0.017  | 0.335  | 0.01   | 0.415  |
| 506 | pm19-pm30 | -0.016 | 0.35   | -0.029 | 0.288  | 0.004  | 0.965  |
| 507 | pm19-pm31 | -0.005 | 0.903  | 0.024  | 0.259  | 0.032  | 0.205  |
| 508 | pm19-pm32 | 0.002  | 0.677  | -0.016 | 0.387  | -0.031 | 0.216  |
| 509 | pm19-pm33 | -0.007 | 0.458  | -0.004 | 0.877  | 0.013  | 0.378  |
| 510 | pm19-pm34 | -0.022 | 0.279  | -0.02  | 0.231  | -0.015 | 0.345  |
| 511 | pm19-pm35 | 0.015  | 0.382  | 0.028  | 0.245  | 0.013  | 0.345  |
| 512 | pm19-pm36 | 0.012  | 0.385  | 0.023  | 0.276  | 0.021  | 0.226  |
| 513 | pm19-pm37 | -0.011 | 0.366  | 0.035  | 0.24   | 0.034  | 0.214  |
| 514 | pm20-pm21 | -0.117 | 0.005  | -0.091 | 0.012  | -0.129 | 0.007  |
| 515 | pm20-pm22 | 0.046  | 0.198  | -0.252 | <0.001 | -0.26  | <0.001 |
| 516 | pm20-pm23 | 0.03   | 0.235  | 0.035  | 0.286  | 0.017  | 0.31   |
| 517 | pm20-pm24 | 0.031  | 0.267  | 0.04   | 0.179  | 0.036  | 0.256  |

|     |           |        |        |        |        |        |        |
|-----|-----------|--------|--------|--------|--------|--------|--------|
| 518 | pm20-pm25 | -0.019 | 0.374  | -0.003 | 0.812  | 0.01   | 0.333  |
| 519 | pm20-pm26 | 0.005  | 0.818  | -0.023 | 0.298  | 0.009  | 0.546  |
| 520 | pm20-pm27 | 0.008  | 0.58   | -0.025 | 0.249  | -0.024 | 0.217  |
| 521 | pm20-pm28 | -0.259 | <0.001 | -0.238 | <0.001 | -0.246 | <0.001 |
| 522 | pm20-pm29 | -0.282 | <0.001 | -0.259 | <0.001 | -0.248 | <0.001 |
| 523 | pm20-pm30 | -0.021 | 0.265  | -0.039 | 0.266  | -0.039 | 0.22   |
| 524 | pm20-pm31 | 0.037  | 0.252  | 0.003  | 0.759  | 0.03   | 0.218  |
| 525 | pm20-pm32 | -0.021 | 0.289  | -0.029 | 0.218  | -0.025 | 0.288  |
| 526 | pm20-pm33 | 0.013  | 0.321  | -0.008 | 0.432  | -0.014 | 0.394  |
| 527 | pm20-pm34 | -0.028 | 0.292  | -0.001 | 0.912  | -0.021 | 0.248  |
| 528 | pm20-pm35 | -0.018 | 0.394  | -0.027 | 0.224  | 0.008  | 0.414  |
| 529 | pm20-pm36 | 0.011  | 0.311  | -0.001 | 0.901  | 0.022  | 0.278  |
| 530 | pm20-pm37 | -0.003 | 0.665  | -0.016 | 0.362  | 0.008  | 0.515  |
| 531 | pm21-pm22 | -0.065 | 0.025  | -0.064 | 0.03   | -0.038 | 0.295  |
| 532 | pm21-pm23 | -0.071 | 0.014  | -0.07  | 0.031  | -0.101 | 0.006  |
| 533 | pm21-pm24 | -0.091 | 0.012  | -0.101 | 0.008  | -0.116 | 0.006  |
| 534 | pm21-pm25 | -0.084 | 0.018  | -0.095 | 0.015  | -0.118 | 0.006  |
| 535 | pm21-pm26 | -0.134 | 0.01   | -0.121 | 0.006  | -0.131 | 0.006  |
| 536 | pm21-pm27 | -0.133 | 0.009  | -0.111 | 0.005  | -0.121 | 0.006  |
| 537 | pm21-pm28 | -0.014 | 0.375  | -0.043 | 0.189  | -0.036 | 0.285  |
| 538 | pm21-pm29 | -0.126 | 0.01   | -0.093 | 0.017  | -0.095 | 0.016  |
| 539 | pm21-pm30 | -0.157 | 0.001  | -0.126 | 0.007  | -0.146 | 0.007  |
| 540 | pm21-pm31 | -0.072 | 0.015  | -0.088 | 0.019  | -0.068 | 0.044  |
| 541 | pm21-pm32 | -0.12  | 0.007  | -0.095 | 0.016  | -0.096 | 0.013  |
| 542 | pm21-pm33 | -0.1   | 0.015  | -0.059 | 0.042  | -0.095 | 0.019  |
| 543 | pm21-pm34 | -0.089 | 0.011  | -0.06  | 0.038  | -0.105 | 0.006  |
| 544 | pm21-pm35 | -0.084 | 0.016  | -0.077 | 0.016  | -0.075 | 0.013  |
| 545 | pm21-pm36 | -0.116 | 0.01   | -0.072 | 0.013  | -0.107 | 0.008  |
| 546 | pm21-pm37 | -0.083 | 0.018  | -0.075 | 0.011  | -0.081 | 0.012  |
| 547 | pm22-pm23 | 0.164  | 0.003  | 0.153  | 0.004  | 0.163  | 0.004  |

|     |           |        |        |        |        |        |        |
|-----|-----------|--------|--------|--------|--------|--------|--------|
| 548 | pm22-pm24 | -0.276 | <0.001 | -0.083 | 0.016  | 0.045  | 0.197  |
| 549 | pm22-pm25 | 0.006  | 0.507  | 0.024  | 0.283  | 0.023  | 0.265  |
| 550 | pm22-pm26 | 0.001  | 0.813  | 0.025  | 0.229  | 0.029  | 0.236  |
| 551 | pm22-pm27 | 0.02   | 0.391  | 0.01   | 0.459  | 0.015  | 0.342  |
| 552 | pm22-pm28 | -0.22  | <0.001 | -0.211 | <0.001 | -0.227 | <0.001 |
| 553 | pm22-pm29 | -0.385 | <0.001 | -0.348 | <0.001 | -0.367 | <0.001 |
| 554 | pm22-pm30 | -0.067 | 0.03   | -0.066 | 0.035  | -0.065 | 0.026  |
| 555 | pm22-pm31 | 0.02   | 0.23   | 0.024  | 0.213  | 0.039  | 0.277  |
| 556 | pm22-pm32 | 0.025  | 0.229  | 0.038  | 0.268  | 0.004  | 0.938  |
| 557 | pm22-pm33 | 0.02   | 0.227  | -0.003 | 0.603  | 0.001  | 0.902  |
| 558 | pm22-pm34 | 0.007  | 0.528  | 0.027  | 0.25   | 0.014  | 0.376  |
| 559 | pm22-pm35 | 0.028  | 0.289  | 0.022  | 0.26   | 0.009  | 0.422  |
| 560 | pm22-pm36 | 0.011  | 0.38   | 0.01   | 0.339  | 0.012  | 0.384  |
| 561 | pm22-pm37 | 0.044  | 0.19   | 0.039  | 0.215  | 0.02   | 0.345  |
| 562 | pm23-pm24 | -0.215 | <0.001 | -0.255 | <0.001 | -0.25  | <0.001 |
| 563 | pm23-pm25 | 0.008  | 0.59   | -0.007 | 0.568  | -0.017 | 0.324  |
| 564 | pm23-pm26 | -0.277 | <0.001 | -0.243 | <0.001 | -0.24  | <0.001 |
| 565 | pm23-pm27 | -0.26  | <0.001 | -0.252 | <0.001 | -0.24  | <0.001 |
| 566 | pm23-pm28 | -0.215 | <0.001 | -0.219 | <0.001 | -0.206 | <0.001 |
| 567 | pm23-pm29 | 0.015  | 0.346  | 0.012  | 0.364  | 0.013  | 0.39   |
| 568 | pm23-pm30 | -0.032 | 0.228  | -0.038 | 0.254  | -0.028 | 0.213  |
| 569 | pm23-pm31 | 0.023  | 0.228  | 0.013  | 0.321  | 0.005  | 0.806  |
| 570 | pm23-pm32 | 0.021  | 0.214  | 0.003  | 0.69   | 0.038  | 0.212  |
| 571 | pm23-pm33 | 0.004  | 0.651  | 0.009  | 0.474  | -0.003 | 0.933  |
| 572 | pm23-pm34 | 0.012  | 0.398  | -0.023 | 0.282  | 0.004  | 0.813  |
| 573 | pm23-pm35 | 0.011  | 0.383  | 0.007  | 0.5    | -0.015 | 0.383  |
| 574 | pm23-pm36 | -0.475 | <0.001 | -0.444 | <0.001 | -0.472 | <0.001 |
| 575 | pm23-pm37 | 0.012  | 0.328  | -0.008 | 0.514  | -0.01  | 0.566  |
| 576 | pm24-pm25 | 0.026  | 0.268  | -0.002 | 0.63   | 0.007  | 0.588  |
| 577 | pm24-pm26 | -0.022 | 0.297  | -0.002 | 0.918  | 0.001  | 0.641  |



|     |           |        |        |        |        |        |        |
|-----|-----------|--------|--------|--------|--------|--------|--------|
| 578 | pm24-pm27 | 0      | 0.727  | -0.032 | 0.225  | -0.015 | 0.391  |
| 579 | pm24-pm28 | -0.238 | <0.001 | -0.24  | <0.001 | -0.225 | <0.001 |
| 580 | pm24-pm29 | -0.031 | 0.232  | -0.043 | 0.153  | -0.013 | 0.398  |
| 581 | pm24-pm30 | -0.045 | 0.199  | -0.023 | 0.211  | -0.021 | 0.207  |
| 582 | pm24-pm31 | 0.024  | 0.274  | -0.013 | 0.312  | -0.003 | 0.759  |
| 583 | pm24-pm32 | -0.021 | 0.291  | 0.012  | 0.385  | -0.02  | 0.325  |
| 584 | pm24-pm33 | -0.018 | 0.36   | -0.032 | 0.209  | -0.015 | 0.348  |
| 585 | pm24-pm34 | 0.017  | 0.341  | 0.018  | 0.353  | -0.003 | 0.622  |
| 586 | pm24-pm35 | 0.032  | 0.292  | 0.034  | 0.266  | 0      | 0.739  |
| 587 | pm24-pm36 | -0.012 | 0.383  | -0.032 | 0.212  | 0      | 0.873  |
| 588 | pm24-pm37 | 0.035  | 0.249  | 0.019  | 0.391  | 0.019  | 0.32   |
| 589 | pm25-pm26 | 0.016  | 0.348  | -0.009 | 0.402  | 0.026  | 0.247  |
| 590 | pm25-pm27 | 0.009  | 0.418  | -0.032 | 0.243  | -0.016 | 0.393  |
| 591 | pm25-pm28 | -0.26  | <0.001 | -0.24  | <0.001 | -0.226 | <0.001 |
| 592 | pm25-pm29 | -0.02  | 0.352  | -0.031 | 0.275  | -0.045 | 0.164  |
| 593 | pm25-pm30 | -0.025 | 0.272  | -0.007 | 0.412  | -0.026 | 0.238  |
| 594 | pm25-pm31 | 0.021  | 0.279  | 0.021  | 0.252  | 0.001  | 0.605  |
| 595 | pm25-pm32 | -0.004 | 0.65   | -0.017 | 0.389  | 0.029  | 0.241  |
| 596 | pm25-pm33 | -0.014 | 0.375  | 0.009  | 0.575  | -0.011 | 0.346  |
| 597 | pm25-pm34 | 0.004  | 0.981  | -0.008 | 0.482  | -0.012 | 0.307  |
| 598 | pm25-pm35 | -0.027 | 0.24   | 0.008  | 0.526  | -0.015 | 0.372  |
| 599 | pm25-pm36 | 0.006  | 0.532  | 0.004  | 0.979  | -0.02  | 0.315  |
| 600 | pm25-pm37 | 0.024  | 0.261  | 0.023  | 0.233  | 0.034  | 0.247  |
| 601 | pm26-pm27 | -0.014 | 0.359  | 0.003  | 0.719  | 0.009  | 0.55   |
| 602 | pm26-pm28 | -0.284 | <0.001 | -0.267 | <0.001 | -0.244 | <0.001 |
| 603 | pm26-pm29 | -0.006 | 0.453  | 0.003  | 0.987  | -0.032 | 0.229  |
| 604 | pm26-pm30 | -0.017 | 0.34   | -0.014 | 0.396  | -0.034 | 0.238  |
| 605 | pm26-pm31 | -0.008 | 0.538  | -0.009 | 0.577  | 0.021  | 0.227  |
| 606 | pm26-pm32 | 0.01   | 0.314  | 0.024  | 0.282  | -0.019 | 0.306  |
| 607 | pm26-pm33 | -0.004 | 0.623  | -0.005 | 0.56   | 0.025  | 0.247  |

|     |           |        |        |        |        |        |        |
|-----|-----------|--------|--------|--------|--------|--------|--------|
| 608 | pm26-pm34 | 0.004  | 0.866  | -0.03  | 0.223  | -0.017 | 0.347  |
| 609 | pm26-pm35 | -0.03  | 0.205  | -0.009 | 0.418  | -0.031 | 0.24   |
| 610 | pm26-pm36 | 0.017  | 0.392  | 0.001  | 0.739  | 0.008  | 0.543  |
| 611 | pm26-pm37 | 0.022  | 0.231  | 0.006  | 0.41   | 0.007  | 0.559  |
| 612 | pm27-pm28 | -0.284 | <0.001 | -0.271 | <0.001 | -0.272 | <0.001 |
| 613 | pm27-pm29 | -0.009 | 0.567  | 0.009  | 0.442  | -0.011 | 0.304  |
| 614 | pm27-pm30 | -0.026 | 0.226  | -0.037 | 0.263  | -0.013 | 0.372  |
| 615 | pm27-pm31 | -0.021 | 0.291  | -0.02  | 0.371  | -0.027 | 0.246  |
| 616 | pm27-pm32 | -0.016 | 0.326  | 0.006  | 0.534  | 0.004  | 0.62   |
| 617 | pm27-pm33 | -0.023 | 0.208  | -0.028 | 0.212  | -0.028 | 0.247  |
| 618 | pm27-pm34 | 0.033  | 0.212  | 0.013  | 0.34   | 0.016  | 0.376  |
| 619 | pm27-pm35 | -0.01  | 0.464  | 0.021  | 0.289  | 0.027  | 0.289  |
| 620 | pm27-pm36 | 0.029  | 0.243  | -0.005 | 0.785  | -0.007 | 0.579  |
| 621 | pm27-pm37 | 0.031  | 0.272  | -0.007 | 0.449  | -0.009 | 0.466  |
| 622 | pm28-pm29 | -0.204 | <0.001 | -0.189 | 0.002  | -0.188 | 0.003  |
| 623 | pm28-pm30 | 0.024  | 0.222  | 0.006  | 0.503  | 0.031  | 0.261  |
| 624 | pm28-pm31 | -0.233 | <0.001 | -0.223 | <0.001 | -0.235 | <0.001 |
| 625 | pm28-pm32 | -0.263 | <0.001 | -0.279 | <0.001 | -0.267 | <0.001 |
| 626 | pm28-pm33 | -0.248 | <0.001 | -0.247 | <0.001 | -0.29  | <0.001 |
| 627 | pm28-pm34 | -0.213 | <0.001 | -0.222 | <0.001 | -0.229 | <0.001 |
| 628 | pm28-pm35 | -0.239 | <0.001 | -0.249 | <0.001 | -0.214 | <0.001 |
| 629 | pm28-pm36 | 0.022  | 0.282  | 0.018  | 0.302  | 0.003  | 0.745  |
| 630 | pm28-pm37 | -0.462 | <0.001 | -0.492 | <0.001 | -0.495 | <0.001 |
| 631 | pm29-pm30 | -0.258 | <0.001 | -0.243 | <0.001 | -0.277 | <0.001 |
| 632 | pm29-pm31 | 0.016  | 0.37   | 0.015  | 0.347  | 0.001  | 0.882  |
| 633 | pm29-pm32 | 0.001  | 0.932  | 0.038  | 0.23   | 0.009  | 0.444  |
| 634 | pm29-pm33 | -0.039 | 0.276  | -0.054 | 0.045  | -0.046 | 0.183  |
| 635 | pm29-pm34 | -0.026 | 0.271  | -0.011 | 0.389  | 0.012  | 0.361  |
| 636 | pm29-pm35 | -0.043 | 0.168  | -0.017 | 0.328  | 0.002  | 0.728  |
| 637 | pm29-pm36 | 0      | 0.696  | -0.012 | 0.39   | 0.019  | 0.362  |

|     |           |        |       |        |       |        |       |
|-----|-----------|--------|-------|--------|-------|--------|-------|
| 638 | pm29-pm37 | 0.027  | 0.222 | 0.03   | 0.229 | 0      | 0.744 |
| 639 | pm30-pm31 | -0.029 | 0.252 | -0.025 | 0.216 | 0.007  | 0.594 |
| 640 | pm30-pm32 | 0.003  | 0.661 | -0.041 | 0.198 | -0.015 | 0.341 |
| 641 | pm30-pm33 | 0.004  | 0.746 | 0      | 0.65  | -0.018 | 0.376 |
| 642 | pm30-pm34 | -0.065 | 0.045 | -0.039 | 0.221 | -0.079 | 0.013 |
| 643 | pm30-pm35 | -0.014 | 0.354 | -0.021 | 0.255 | 0.024  | 0.258 |
| 644 | pm30-pm36 | -0.008 | 0.465 | 0.021  | 0.287 | 0.017  | 0.386 |
| 645 | pm30-pm37 | 0.01   | 0.586 | 0.026  | 0.247 | 0.016  | 0.358 |
| 646 | pm31-pm32 | -0.022 | 0.273 | 0.014  | 0.322 | -0.014 | 0.315 |
| 647 | pm31-pm33 | -0.004 | 0.996 | 0.023  | 0.212 | 0.033  | 0.265 |
| 648 | pm31-pm34 | 0.014  | 0.324 | -0.014 | 0.321 | 0.027  | 0.243 |
| 649 | pm31-pm35 | 0.019  | 0.371 | 0.01   | 0.592 | -0.001 | 0.847 |
| 650 | pm31-pm36 | -0.003 | 0.763 | -0.013 | 0.367 | -0.011 | 0.369 |
| 651 | pm31-pm37 | -0.016 | 0.35  | 0.017  | 0.319 | -0.004 | 0.728 |
| 652 | pm32-pm33 | 0.027  | 0.205 | -0.017 | 0.394 | -0.01  | 0.36  |
| 653 | pm32-pm34 | -0.011 | 0.305 | -0.011 | 0.372 | -0.015 | 0.367 |
| 654 | pm32-pm35 | 0.016  | 0.399 | 0.035  | 0.291 | 0.028  | 0.297 |
| 655 | pm32-pm36 | 0      | 0.772 | -0.01  | 0.426 | 0      | 0.868 |
| 656 | pm32-pm37 | 0.011  | 0.356 | 0.017  | 0.341 | 0.016  | 0.365 |
| 657 | pm33-pm34 | -0.008 | 0.593 | 0.013  | 0.374 | -0.025 | 0.21  |
| 658 | pm33-pm35 | -0.003 | 0.82  | 0.009  | 0.413 | 0.003  | 0.79  |
| 659 | pm33-pm36 | 0.023  | 0.214 | -0.019 | 0.367 | 0.005  | 0.448 |
| 660 | pm33-pm37 | 0.012  | 0.333 | 0.024  | 0.289 | 0.01   | 0.555 |
| 661 | pm34-pm35 | 0.005  | 0.852 | 0.029  | 0.248 | 0.006  | 0.515 |
| 662 | pm34-pm36 | 0.032  | 0.267 | 0.024  | 0.201 | 0.012  | 0.306 |
| 663 | pm34-pm37 | 0.021  | 0.232 | -0.017 | 0.399 | 0.012  | 0.334 |
| 664 | pm35-pm36 | -0.009 | 0.597 | -0.002 | 0.824 | 0.011  | 0.329 |
| 665 | pm35-pm37 | -0.007 | 0.518 | -0.024 | 0.279 | -0.021 | 0.251 |
| 666 | pm36-pm37 | 0.007  | 0.44  | 0.004  | 0.852 | 0.003  | 0.672 |

**Supplementray Data Set S4.** Results of the distribution perturbation analyses for hypertrophy in the cardiac signaling network.

1a) Result of one-distribution perturbation analysis for hypertrophy when each response function was separately applied

|                   |      | Lin    |         | Hill   |         | Sat    |         | Acc    |         |
|-------------------|------|--------|---------|--------|---------|--------|---------|--------|---------|
|                   |      | Effect | p-value | Effect | p-value | Effect | p-value | Effect | p-value |
| Threshold: top 5% | pm1  | 1.019  | 0.818   | 1.025  | 0.806   | 1.020  | 0.132   | 0.998  | 0.328   |
|                   | pm2  | 0.999  | 0.917   | 1.003  | 0.774   | 0.998  | 0.451   | 0.999  | 0.607   |
|                   | pm3  | 1.002  | 0.679   | 1.034  | 0.908   | 0.994  | 0.421   | 1.019  | 0.670   |
|                   | pm4  | 1.005  | 0.859   | 1.092  | 0.536   | 1.000  | 0.986   | 1.005  | 0.115   |
|                   | pm5  | 1.008  | 0.486   | 1.000  | 0.870   | 0.998  | 0.693   | 1.003  | 0.585   |
|                   | pm6  | 0.998  | 0.411   | 0.994  | 0.435   | 0.997  | 0.545   | 0.998  | 0.642   |
|                   | pm7  | 3.115  | <0.001  | 2.285  | <0.001  | 3.306  | <0.001  | 2.322  | <0.001  |
|                   | pm8  | 1.029  | 0.401   | 1.004  | 0.169   | 1.002  | 0.594   | 1.047  | 0.322   |
|                   | pm9  | 1.040  | 0.377   | 1.066  | 0.493   | 1.027  | 0.349   | 1.024  | 0.754   |
|                   | pm10 | 1.557  | <0.001  | 1.542  | <0.001  | 1.367  | <0.001  | 1.692  | <0.001  |
|                   | pm11 | 0.998  | 0.616   | 0.996  | 0.422   | 0.996  | 0.593   | 0.996  | 0.548   |
|                   | pm12 | 1.005  | 0.609   | 1.038  | 0.763   | 0.998  | 0.562   | 1.017  | 0.804   |
|                   | pm13 | 0.864  | 0.012   | 0.841  | 0.009   | 0.897  | 0.184   | 0.765  | <0.001  |
|                   | pm14 | 0.913  | 0.209   | 0.894  | 0.039   | 0.927  | 0.961   | 0.879  | 0.027   |
|                   | pm15 | 1.151  | 0.021   | 1.267  | <0.001  | 1.162  | 0.024   | 1.169  | 0.020   |
|                   | pm16 | 1.148  | 0.022   | 1.193  | 0.008   | 1.218  | <0.001  | 1.178  | 0.010   |
|                   | pm17 | 1.148  | 0.022   | 1.170  | 0.009   | 1.196  | 0.007   | 1.154  | 0.020   |
|                   | pm18 | 1.014  | 0.303   | 1.023  | 0.105   | 0.998  | 0.439   | 1.005  | 0.541   |
|                   | pm19 | 1.002  | 0.625   | 1.077  | 0.645   | 1.042  | 0.492   | 1.051  | 0.681   |
|                   | pm20 | 1.019  | 0.209   | 1.032  | 0.480   | 0.996  | 0.279   | 1.017  | 0.642   |

|                    |      |        |         |        |         |        |         |        |         |       |
|--------------------|------|--------|---------|--------|---------|--------|---------|--------|---------|-------|
|                    | pm21 | 1.626  | <0.001  | 1.143  | 0.033   | 1.873  | <0.001  | 1.207  | <0.001  |       |
|                    | pm22 | 0.984  | 0.277   | 1.045  | 0.356   | 0.928  | 0.751   | 0.992  | 0.262   |       |
|                    | pm23 | 0.986  | 0.690   | 1.038  | 0.829   | 0.929  | 0.949   | 0.992  | 0.524   |       |
|                    | pm24 | 0.998  | 0.278   | 1.029  | 0.591   | 0.999  | 0.638   | 0.995  | 0.793   |       |
|                    | pm25 | 0.998  | 0.582   | 0.996  | 0.916   | 0.997  | 0.329   | 0.998  | 0.567   |       |
|                    | pm26 | 0.997  | 0.572   | 0.995  | 0.407   | 0.997  | 0.502   | 0.998  | 0.403   |       |
|                    | pm27 | 1.018  | 0.769   | 1.080  | 0.818   | 1.019  | 0.290   | 1.005  | 0.455   |       |
|                    | pm28 | 1.010  | 0.149   | 1.028  | 0.562   | 1.002  | 0.357   | 1.026  | 0.216   |       |
|                    | pm29 | 1.007  | 0.956   | 1.024  | 0.876   | 0.984  | 0.468   | 1.010  | 0.344   |       |
|                    | pm30 | 1.011  | 0.362   | 1.023  | 0.357   | 0.988  | 0.718   | 1.026  | 0.774   |       |
|                    | pm31 | 1.023  | 0.537   | 1.096  | 0.394   | 1.026  | 0.417   | 1.012  | 0.566   |       |
|                    | pm32 | 1.001  | 0.985   | 1.020  | 0.375   | 1.003  | 0.292   | 1.072  | 0.920   |       |
|                    | pm33 | 1.022  | 0.214   | 1.136  | 0.025   | 1.004  | 0.140   | 1.201  | 0.016   |       |
|                    | pm34 | 1.016  | 0.806   | 1.036  | 0.871   | 0.921  | 0.660   | 1.072  | 0.380   |       |
|                    | pm35 | 1.018  | 0.504   | 1.042  | 0.289   | 0.933  | 0.819   | 1.125  | 0.319   |       |
|                    | pm36 | 1.000  | 0.654   | 0.998  | 0.622   | 0.996  | 0.608   | 0.998  | 0.532   |       |
|                    | pm37 | 0.997  | 0.976   | 0.992  | 0.385   | 0.997  | 0.976   | 0.998  | 0.742   |       |
| Threshold: top 10% |      | Lin    |         | Hill   |         | Sat    |         | Acc    |         |       |
|                    |      | Effect | p-value | Effect | p-value | Effect | p-value | Effect | p-value |       |
|                    |      | pm1    | 1.016   | 0.508  | 1.024   | 0.780  | 1.017   | 0.301  | 0.998   | 0.834 |
|                    |      | pm2    | 0.999   | 0.314  | 1.003   | 0.975  | 0.998   | 0.446  | 0.999   | 0.215 |
|                    |      | pm3    | 1.002   | 0.140  | 1.030   | 0.454  | 0.994   | 0.836  | 1.017   | 0.203 |
|                    |      | pm4    | 1.004   | 0.901  | 1.074   | 0.160  | 1.000   | 0.951  | 1.004   | 0.204 |
|                    |      | pm5    | 1.007   | 0.629  | 1.000   | 0.628  | 0.998   | 0.547  | 1.003   | 0.792 |
|                    |      | pm6    | 0.998   | 0.574  | 0.994   | 0.338  | 0.997   | 0.212  | 0.998   | 0.194 |

|      |       |        |       |        |       |        |       |        |
|------|-------|--------|-------|--------|-------|--------|-------|--------|
| pm7  | 2.920 | <0.001 | 2.081 | <0.001 | 2.798 | <0.001 | 2.387 | <0.001 |
| pm8  | 1.023 | 0.567  | 1.004 | 0.158  | 1.002 | 0.604  | 1.044 | 0.364  |
| pm9  | 1.041 | 0.166  | 1.067 | 0.974  | 1.023 | 0.880  | 1.023 | 0.479  |
| pm10 | 1.448 | <0.001 | 1.565 | <0.001 | 1.286 | <0.001 | 1.532 | <0.001 |
| pm11 | 0.998 | 0.967  | 0.996 | 0.968  | 0.997 | 0.842  | 0.996 | 0.155  |
| pm12 | 1.004 | 0.948  | 1.031 | 0.378  | 0.999 | 0.195  | 1.014 | 0.437  |
| pm13 | 0.860 | 0.013  | 0.856 | 0.012  | 0.896 | 0.224  | 0.822 | <0.001 |
| pm14 | 0.915 | 0.720  | 0.885 | 0.468  | 0.925 | 0.241  | 0.871 | 0.012  |
| pm15 | 1.126 | 0.033  | 1.260 | <0.001 | 1.125 | 0.033  | 1.144 | 0.021  |
| pm16 | 1.151 | 0.020  | 1.171 | 0.011  | 1.207 | <0.001 | 1.101 | 0.043  |
| pm17 | 1.156 | 0.021  | 1.185 | <0.001 | 1.221 | <0.001 | 1.142 | 0.022  |
| pm18 | 1.012 | 0.440  | 1.021 | 0.569  | 0.998 | 0.833  | 1.005 | 0.298  |
| pm19 | 1.002 | 0.249  | 1.069 | 0.983  | 1.040 | 0.574  | 1.043 | 0.430  |
| pm20 | 1.020 | 0.491  | 1.032 | 0.901  | 0.996 | 0.612  | 1.014 | 0.639  |
| pm21 | 1.574 | <0.001 | 1.129 | 0.036  | 1.831 | <0.001 | 1.183 | 0.012  |
| pm22 | 0.985 | 0.558  | 1.048 | 0.818  | 0.931 | 0.284  | 0.992 | 0.408  |
| pm23 | 0.987 | 0.110  | 1.029 | 0.756  | 0.934 | 0.145  | 0.991 | 0.634  |
| pm24 | 0.997 | 0.979  | 1.029 | 0.126  | 0.999 | 0.193  | 0.995 | 0.773  |
| pm25 | 0.998 | 0.446  | 0.996 | 0.431  | 0.997 | 0.978  | 0.998 | 0.522  |
| pm26 | 0.998 | 0.754  | 0.996 | 0.383  | 0.997 | 0.963  | 0.998 | 0.404  |
| pm27 | 1.014 | 0.656  | 1.083 | 0.972  | 1.022 | 0.276  | 1.005 | 0.683  |
| pm28 | 1.008 | 0.949  | 1.024 | 0.809  | 1.002 | 0.658  | 1.020 | 0.958  |
| pm29 | 1.006 | 0.323  | 1.018 | 0.400  | 0.987 | 0.485  | 1.010 | 0.369  |
| pm30 | 1.012 | 0.168  | 1.019 | 0.701  | 0.987 | 0.192  | 1.020 | 0.671  |
| pm31 | 1.019 | 0.880  | 1.084 | 0.359  | 1.023 | 0.567  | 1.014 | 0.632  |
| pm32 | 1.001 | 0.508  | 1.018 | 0.758  | 1.004 | 0.636  | 1.058 | 0.265  |

|                    |      |        |         |        |         |        |         |        |         |        |
|--------------------|------|--------|---------|--------|---------|--------|---------|--------|---------|--------|
|                    | pm33 | 1.019  | 0.733   | 1.121  | 0.038   | 1.004  | 0.885   | 1.184  | 0.011   |        |
|                    | pm34 | 1.013  | 0.156   | 1.031  | 0.311   | 0.929  | 0.284   | 1.062  | 0.103   |        |
|                    | pm35 | 1.015  | 0.834   | 1.036  | 0.565   | 0.933  | 0.467   | 1.112  | 0.944   |        |
|                    | pm36 | 1.000  | 0.337   | 0.997  | 0.170   | 0.997  | 0.608   | 0.998  | 0.799   |        |
|                    | pm37 | 0.998  | 0.348   | 0.994  | 0.872   | 0.997  | 0.179   | 0.998  | 0.520   |        |
| Threshold: top 20% |      | Lin    |         | Hill   |         | Sat    |         | Acc    |         |        |
|                    |      | Effect | p-value | Effect | p-value | Effect | p-value | Effect | p-value |        |
|                    |      | pm1    | 1.015   | 0.113  | 1.018   | 0.686  | 1.015   | 0.168  | 0.998   | 0.315  |
|                    |      | pm2    | 0.999   | 0.515  | 1.003   | 0.332  | 0.998   | 0.787  | 0.999   | 0.916  |
|                    |      | pm3    | 1.002   | 0.188  | 1.026   | 0.631  | 0.995   | 0.648  | 1.015   | 0.433  |
|                    |      | pm4    | 1.003   | 0.144  | 1.066   | 0.790  | 1.000   | 0.571  | 1.004   | 0.152  |
|                    |      | pm5    | 1.006   | 0.438  | 1.000   | 0.341  | 0.999   | 0.884  | 1.002   | 0.698  |
|                    |      | pm6    | 0.998   | 0.809  | 0.995   | 0.874  | 0.998   | 0.247  | 0.998   | 0.147  |
|                    |      | pm7    | 2.654   | <0.001 | 1.920   | <0.001 | 2.509   | <0.001 | 2.203   | <0.001 |
|                    |      | pm8    | 1.021   | 0.957  | 1.003   | 0.486  | 1.002   | 0.128  | 1.038   | 0.432  |
|                    |      | pm9    | 1.036   | 0.657  | 1.056   | 0.944  | 1.020   | 0.557  | 1.020   | 0.459  |
|                    |      | pm10   | 1.411   | <0.001 | 1.505   | <0.001 | 1.252   | <0.001 | 1.500   | <0.001 |
|                    |      | pm11   | 0.998   | 0.291  | 0.996   | 0.977  | 0.997   | 0.421  | 0.996   | 0.896  |
|                    |      | pm12   | 1.003   | 0.785  | 1.026   | 0.975  | 0.999   | 0.701  | 1.013   | 0.523  |
|                    |      | pm13   | 0.893   | 0.038  | 0.869   | 0.024  | 0.905   | 0.708  | 0.837   | <0.001 |
|                    |      | pm14   | 0.927   | 0.880  | 0.906   | 0.901  | 0.940   | 0.830  | 0.898   | 0.228  |
|                    |      | pm15   | 1.134   | 0.040  | 1.223   | <0.001 | 1.135   | 0.035  | 1.139   | 0.031  |
|                    |      | pm16   | 1.148   | 0.022  | 1.137   | 0.028  | 1.166   | 0.015  | 1.151   | 0.020  |
|                    |      | pm17   | 1.127   | 0.041  | 1.156   | 0.030  | 1.173   | 0.011  | 1.130   | 0.037  |
|                    | pm18 | 1.010  | 0.951   | 1.017  | 0.602   | 0.998  | 0.447   | 1.004  | 0.281   |        |

|      |       |        |       |       |       |        |       |       |
|------|-------|--------|-------|-------|-------|--------|-------|-------|
| pm19 | 1.002 | 1.000  | 1.061 | 0.129 | 1.036 | 0.230  | 1.037 | 0.170 |
| pm20 | 1.016 | 0.182  | 1.026 | 0.169 | 0.996 | 0.839  | 1.012 | 0.530 |
| pm21 | 1.475 | <0.001 | 1.122 | 0.042 | 1.748 | <0.001 | 1.176 | 0.013 |
| pm22 | 0.987 | 0.687  | 1.039 | 0.252 | 0.933 | 0.206  | 0.993 | 0.432 |
| pm23 | 0.990 | 0.377  | 1.028 | 0.979 | 0.935 | 0.122  | 0.993 | 0.750 |
| pm24 | 0.998 | 0.511  | 1.024 | 0.350 | 0.999 | 0.992  | 0.996 | 0.276 |
| pm25 | 0.998 | 0.755  | 0.996 | 0.777 | 0.998 | 0.743  | 0.998 | 0.612 |
| pm26 | 0.998 | 0.534  | 0.996 | 0.137 | 0.998 | 0.893  | 0.998 | 0.927 |
| pm27 | 1.013 | 0.341  | 1.068 | 0.224 | 1.017 | 0.361  | 1.005 | 0.966 |
| pm28 | 1.007 | 0.405  | 1.021 | 0.156 | 1.002 | 0.783  | 1.019 | 0.442 |
| pm29 | 1.005 | 0.799  | 1.016 | 0.880 | 0.989 | 0.303  | 1.009 | 0.402 |
| pm30 | 1.009 | 0.191  | 1.017 | 0.220 | 0.989 | 0.809  | 1.017 | 0.289 |
| pm31 | 1.018 | 0.250  | 1.077 | 0.395 | 1.019 | 0.889  | 1.011 | 0.370 |
| pm32 | 1.001 | 0.423  | 1.015 | 0.646 | 1.003 | 0.494  | 1.049 | 0.327 |
| pm33 | 1.016 | 0.961  | 1.106 | 0.079 | 1.003 | 0.948  | 1.158 | 0.036 |
| pm34 | 1.011 | 0.390  | 1.029 | 0.688 | 0.942 | 0.969  | 1.057 | 0.515 |
| pm35 | 1.014 | 0.782  | 1.033 | 0.411 | 0.944 | 0.902  | 1.090 | 0.217 |
| pm36 | 1.000 | 0.219  | 0.998 | 0.792 | 0.997 | 0.602  | 0.998 | 0.403 |
| pm37 | 0.998 | 0.857  | 0.994 | 0.915 | 0.998 | 0.625  | 0.998 | 0.590 |



1b) Result of one-distribution perturbation analysis for hypertrophy when four different response function types were applied in a combined manner

|      | Top 5% |         | Top 10% |         | Top 20% |         |
|------|--------|---------|---------|---------|---------|---------|
|      | Effect | p-value | Effect  | p-value | Effect  | p-value |
| pm1  | 1.014  | 0.956   | 1.012   | 0.965   | 1.009   | 0.889   |
| pm2  | 0.999  | 0.662   | 0.999   | 0.785   | 1.000   | 0.983   |
| pm3  | 1.002  | 0.405   | 1.001   | 0.860   | 1.001   | 0.290   |
| pm4  | 1.003  | 0.623   | 1.002   | 0.693   | 1.002   | 0.307   |
| pm5  | 1.007  | 0.274   | 1.005   | 0.950   | 1.005   | 0.831   |
| pm6  | 0.998  | 0.860   | 0.998   | 0.221   | 0.999   | 0.442   |
| pm7  | 2.412  | <0.001  | 2.350   | <0.001  | 1.955   | <0.001  |
| pm8  | 1.019  | 0.462   | 1.017   | 0.575   | 1.013   | 0.398   |
| pm9  | 1.037  | 0.122   | 1.030   | 0.709   | 1.025   | 0.933   |
| pm10 | 1.397  | <0.001  | 1.334   | <0.001  | 1.247   | <0.001  |
| pm11 | 0.998  | 0.673   | 0.998   | 0.269   | 0.999   | 0.828   |
| pm12 | 1.003  | 0.462   | 1.003   | 0.178   | 1.002   | 0.842   |
| pm13 | 0.879  | 0.018   | 0.913   | 0.037   | 0.919   | 0.031   |
| pm14 | 0.925  | 0.176   | 0.934   | 0.563   | 0.946   | 0.912   |
| pm15 | 1.291  | <0.001  | 1.175   | 0.010   | 1.165   | 0.012   |
| pm16 | 1.259  | <0.001  | 1.220   | <0.001  | 1.146   | 0.022   |
| pm17 | 1.191  | 0.006   | 1.153   | 0.018   | 1.142   | 0.025   |
| pm18 | 1.008  | 0.799   | 1.008   | 0.464   | 1.006   | 0.162   |
| pm19 | 1.002  | 0.816   | 1.001   | 0.713   | 1.001   | 0.458   |
| pm20 | 1.017  | 0.925   | 1.014   | 0.245   | 1.011   | 0.719   |
| pm21 | 1.438  | <0.001  | 1.396   | <0.001  | 1.292   | <0.001  |

|      |       |       |       |       |       |       |
|------|-------|-------|-------|-------|-------|-------|
| pm22 | 0.986 | 0.147 | 0.989 | 0.482 | 0.991 | 0.983 |
| pm23 | 0.990 | 0.574 | 0.991 | 0.766 | 0.993 | 0.413 |
| pm24 | 0.998 | 0.884 | 0.998 | 0.748 | 0.999 | 0.644 |
| pm25 | 0.998 | 0.868 | 0.999 | 0.808 | 0.999 | 0.560 |
| pm26 | 0.998 | 0.719 | 0.998 | 0.959 | 0.999 | 0.432 |
| pm27 | 1.013 | 0.434 | 1.010 | 0.192 | 1.009 | 0.565 |
| pm28 | 1.008 | 0.619 | 1.006 | 0.770 | 1.004 | 0.778 |
| pm29 | 1.005 | 0.745 | 1.004 | 0.440 | 1.003 | 0.975 |
| pm30 | 1.009 | 0.238 | 1.008 | 0.951 | 1.006 | 0.275 |
| pm31 | 1.016 | 0.373 | 1.015 | 0.190 | 1.012 | 0.156 |
| pm32 | 1.001 | 0.553 | 1.001 | 0.766 | 1.001 | 0.381 |
| pm33 | 1.016 | 0.940 | 1.011 | 0.959 | 1.011 | 0.737 |
| pm34 | 1.010 | 0.947 | 1.008 | 0.988 | 1.007 | 0.694 |
| pm35 | 1.012 | 0.944 | 1.010 | 0.143 | 1.008 | 0.551 |
| pm36 | 1.000 | 0.914 | 1.000 | 0.542 | 1.000 | 0.784 |
| pm37 | 0.998 | 0.601 | 0.999 | 0.270 | 0.999 | 0.521 |

2) Result of reverse one-distribution perturbation analysis for hypertrophy in cardiac signaling network

2a) Result of reverse one-distribution perturbation analysis for hypertrophy when each response function was separately applied

|                   |      | Lin    |         | Hill   |         | Sat    |         | Acc    |         |
|-------------------|------|--------|---------|--------|---------|--------|---------|--------|---------|
|                   |      | Effect | p-value | Effect | p-value | Effect | p-value | Effect | p-value |
| Threshold: top 5% | pm1  | 0.992  | 0.127   | 0.968  | 0.451   | 0.985  | 0.556   | 0.989  | 0.517   |
|                   | pm2  | 0.998  | 0.134   | 0.990  | 0.868   | 0.997  | 0.434   | 0.995  | 0.733   |
|                   | pm3  | 0.999  | 0.756   | 0.970  | 0.869   | 0.990  | 0.108   | 0.961  | 0.742   |
|                   | pm4  | 0.996  | 0.570   | 0.932  | 0.189   | 0.992  | 0.366   | 0.972  | 0.915   |
|                   | pm5  | 0.996  | 0.777   | 0.999  | 0.571   | 0.999  | 0.260   | 0.978  | 0.992   |
|                   | pm6  | 0.997  | 0.258   | 0.994  | 0.451   | 0.997  | 0.587   | 0.998  | 0.184   |
|                   | pm7  | 0.005  | <0.001  | 0.119  | <0.001  | 0.001  | <0.001  | 0.047  | <0.001  |
|                   | pm8  | 0.983  | 0.737   | 0.996  | 0.814   | 0.992  | 0.311   | 0.954  | 0.868   |
|                   | pm9  | 0.972  | 0.811   | 0.922  | 0.530   | 0.977  | 0.274   | 0.972  | 0.539   |
|                   | pm10 | 0.509  | <0.001  | 0.443  | <0.001  | 0.647  | <0.001  | 0.322  | <0.001  |
|                   | pm11 | 0.997  | 0.115   | 0.993  | 0.830   | 0.997  | 0.173   | 0.991  | 0.606   |
|                   | pm12 | 0.992  | 0.461   | 0.982  | 0.709   | 0.999  | 0.167   | 0.977  | 0.851   |
|                   | pm13 | 1.012  | 0.917   | 1.025  | 0.134   | 0.979  | 0.417   | 1.029  | 0.705   |
|                   | pm14 | 1.120  | 0.879   | 1.082  | 0.411   | 1.092  | 0.766   | 1.102  | 0.843   |
|                   | pm15 | 1.604  | <0.001  | 1.740  | <0.001  | 1.620  | <0.001  | 1.498  | <0.001  |
|                   | pm16 | 0.498  | <0.001  | 0.417  | <0.001  | 0.481  | <0.001  | 0.585  | <0.001  |
|                   | pm17 | 0.464  | <0.001  | 0.385  | <0.001  | 0.419  | <0.001  | 0.699  | <0.001  |
|                   | pm18 | 0.993  | 0.320   | 0.983  | 0.628   | 0.998  | 0.881   | 0.978  | 0.533   |
|                   | pm19 | 1.005  | 0.948   | 0.924  | 0.464   | 0.957  | 0.780   | 0.935  | 0.780   |
|                   | pm20 | 0.989  | 0.693   | 0.977  | 0.712   | 0.997  | 0.141   | 0.989  | 0.411   |

|                    |      |        |         |        |         |        |         |        |         |
|--------------------|------|--------|---------|--------|---------|--------|---------|--------|---------|
|                    | pm21 | 0.489  | <0.001  | 1.130  | 0.582   | 0.276  | <0.001  | 0.777  | <0.001  |
|                    | pm22 | 0.993  | 0.126   | 0.980  | 0.820   | 0.987  | 0.251   | 0.983  | 0.632   |
|                    | pm23 | 1.011  | 0.471   | 0.942  | 0.612   | 0.998  | 0.408   | 0.995  | 0.944   |
|                    | pm24 | 0.999  | 0.721   | 0.976  | 0.446   | 0.999  | 0.447   | 0.997  | 0.231   |
|                    | pm25 | 0.998  | 0.432   | 0.995  | 0.443   | 0.997  | 0.247   | 0.998  | 0.707   |
|                    | pm26 | 0.998  | 0.649   | 0.996  | 0.274   | 0.997  | 0.341   | 0.998  | 0.807   |
|                    | pm27 | 0.979  | 0.110   | 0.935  | 0.296   | 0.963  | 0.933   | 0.987  | 0.402   |
|                    | pm28 | 1.002  | 0.141   | 0.987  | 0.541   | 0.991  | 0.582   | 0.970  | 0.838   |
|                    | pm29 | 0.945  | 0.483   | 0.851  | 0.021   | 0.965  | 0.959   | 0.884  | 0.033   |
|                    | pm30 | 1.025  | 0.742   | 1.074  | 0.571   | 1.007  | 0.114   | 1.041  | 0.183   |
|                    | pm31 | 0.985  | 0.751   | 0.908  | 0.042   | 0.968  | 0.496   | 0.985  | 0.568   |
|                    | pm32 | 0.996  | 0.871   | 0.996  | 0.508   | 0.987  | 0.540   | 0.928  | 0.302   |
|                    | pm33 | 0.984  | 0.618   | 0.903  | 0.046   | 0.979  | 0.449   | 0.785  | <0.001  |
|                    | pm34 | 1.116  | 0.293   | 0.980  | 0.231   | 1.057  | 0.900   | 1.124  | 0.304   |
|                    | pm35 | 0.873  | 0.030   | 0.917  | 0.043   | 0.897  | 0.045   | 0.638  | <0.001  |
|                    | pm36 | 0.999  | 0.180   | 0.996  | 0.264   | 0.998  | 0.919   | 0.998  | 0.177   |
|                    | pm37 | 0.998  | 0.761   | 0.995  | 0.485   | 0.997  | 0.524   | 0.998  | 0.462   |
| Threshold: top 10% |      | Lin    |         | Hill   |         | Sat    |         | Acc    |         |
|                    |      | Effect | p-value | Effect | p-value | Effect | p-value | Effect | p-value |
|                    | pm1  | 0.994  | 0.565   | 0.976  | 0.220   | 0.985  | 0.120   | 0.991  | 0.866   |
|                    | pm2  | 0.998  | 0.391   | 0.990  | 0.190   | 0.997  | 0.334   | 0.996  | 0.205   |
|                    | pm3  | 0.999  | 0.582   | 0.974  | 0.811   | 0.991  | 0.168   | 0.971  | 0.279   |
|                    | pm4  | 0.996  | 0.610   | 0.935  | 0.567   | 0.994  | 0.822   | 0.977  | 0.542   |
|                    | pm5  | 0.997  | 0.564   | 0.999  | 0.433   | 0.999  | 0.759   | 0.981  | 0.237   |
|                    | pm6  | 0.998  | 0.962   | 0.995  | 0.845   | 0.997  | 0.356   | 0.998  | 0.486   |

|      |       |         |       |         |       |         |       |         |
|------|-------|---------|-------|---------|-------|---------|-------|---------|
| pm7  | 0.048 | p<0.001 | 0.156 | p<0.001 | 0.178 | p<0.001 | 0.149 | p<0.001 |
| pm8  | 0.983 | 0.641   | 0.997 | 0.572   | 0.993 | 0.684   | 0.958 | 0.407   |
| pm9  | 0.971 | 0.934   | 0.936 | 0.622   | 0.974 | 0.330   | 0.973 | 0.170   |
| pm10 | 0.610 | p<0.001 | 0.466 | p<0.001 | 0.737 | p<0.001 | 0.477 | p<0.001 |
| pm11 | 0.997 | 0.168   | 0.994 | 0.164   | 0.998 | 0.806   | 0.992 | 0.966   |
| pm12 | 0.992 | 0.502   | 0.983 | 0.159   | 0.999 | 0.353   | 0.980 | 0.440   |
| pm13 | 1.009 | 0.516   | 1.025 | 0.426   | 0.980 | 0.952   | 1.030 | 0.322   |
| pm14 | 1.097 | 0.576   | 1.083 | 0.468   | 1.102 | 0.674   | 1.099 | 0.183   |
| pm15 | 1.558 | p<0.001 | 1.782 | p<0.001 | 1.534 | p<0.001 | 1.514 | p<0.001 |
| pm16 | 0.526 | p<0.001 | 0.385 | p<0.001 | 0.543 | p<0.001 | 0.551 | p<0.001 |
| pm17 | 0.613 | p<0.001 | 0.395 | p<0.001 | 0.500 | p<0.001 | 0.714 | p<0.001 |
| pm18 | 0.992 | 0.441   | 0.987 | 0.121   | 0.998 | 0.661   | 0.981 | 0.298   |
| pm19 | 1.005 | 0.225   | 0.941 | 0.889   | 0.966 | 0.801   | 0.944 | 0.727   |
| pm20 | 0.992 | 0.910   | 0.979 | 0.303   | 0.997 | 0.667   | 0.991 | 0.283   |
| pm21 | 0.572 | p<0.001 | 1.109 | 0.824   | 0.339 | p<0.001 | 0.795 | p<0.001 |
| pm22 | 0.994 | 0.508   | 0.984 | 1.000   | 0.987 | 0.665   | 0.984 | 0.847   |
| pm23 | 1.012 | 0.408   | 0.952 | 0.521   | 0.998 | 0.172   | 0.996 | 0.823   |
| pm24 | 0.999 | 0.290   | 0.976 | 0.268   | 0.999 | 0.850   | 0.997 | 0.482   |
| pm25 | 0.998 | 0.119   | 0.996 | 0.373   | 0.997 | 0.206   | 0.998 | 0.204   |
| pm26 | 0.998 | 0.933   | 0.996 | 0.865   | 0.997 | 0.918   | 0.998 | 0.614   |
| pm27 | 0.977 | 0.432   | 0.924 | 0.800   | 0.963 | 0.282   | 0.986 | 0.902   |
| pm28 | 1.002 | 0.600   | 0.990 | 0.534   | 0.992 | 0.841   | 0.970 | 0.575   |
| pm29 | 0.958 | 0.445   | 0.856 | 0.020   | 0.966 | 0.256   | 0.901 | 0.588   |
| pm30 | 1.024 | 0.212   | 1.075 | 0.885   | 1.006 | 0.696   | 1.040 | 0.294   |
| pm31 | 0.986 | 0.721   | 0.918 | 0.201   | 0.973 | 0.226   | 0.985 | 0.683   |
| pm32 | 0.997 | 0.784   | 0.996 | 0.933   | 0.989 | 0.105   | 0.937 | 0.385   |

|                    |      |        |         |        |         |        |         |        |         |        |
|--------------------|------|--------|---------|--------|---------|--------|---------|--------|---------|--------|
|                    | pm33 | 0.986  | 0.347   | 0.906  | 0.633   | 0.981  | 0.769   | 0.806  | 0.011   |        |
|                    | pm34 | 1.101  | 0.853   | 0.982  | 0.544   | 1.049  | 0.313   | 1.133  | 0.918   |        |
|                    | pm35 | 0.872  | 0.016   | 0.918  | 0.041   | 0.898  | 0.031   | 0.726  | p<0.001 |        |
|                    | pm36 | 0.999  | 0.865   | 0.997  | 0.529   | 0.998  | 0.127   | 0.997  | 0.263   |        |
|                    | pm37 | 0.998  | 0.639   | 0.996  | 0.463   | 0.997  | 0.559   | 0.998  | 0.508   |        |
| Threshold: top 20% |      | Lin    |         | Hill   |         | Sat    |         | Acc    |         |        |
|                    |      | Effect | p-value | Effect | p-value | Effect | p-value | Effect | p-value |        |
|                    |      | pm1    | 0.995   | 0.583  | 0.980   | 0.742  | 0.986   | 0.625  | 0.992   | 0.801  |
|                    |      | pm2    | 0.998   | 0.625  | 0.991   | 0.871  | 0.998   | 0.983  | 0.996   | 0.108  |
|                    |      | pm3    | 0.999   | 0.989  | 0.979   | 0.808  | 0.992   | 0.823  | 0.976   | 0.694  |
|                    |      | pm4    | 0.997   | 0.680  | 0.947   | 0.359  | 0.994   | 0.410  | 0.981   | 0.932  |
|                    |      | pm5    | 0.997   | 0.687  | 0.999   | 0.413  | 0.999   | 0.200  | 0.987   | 0.730  |
|                    |      | pm6    | 0.998   | 0.966  | 0.997   | 0.290  | 0.998   | 0.320  | 0.999   | 0.206  |
|                    |      | pm7    | 0.100   | <0.001 | 0.299   | <0.001 | 0.191   | <0.001 | 0.195   | <0.001 |
|                    |      | pm8    | 0.987   | 0.795  | 0.998   | 0.585  | 0.994   | 0.169  | 0.968   | 0.752  |
|                    |      | pm9    | 0.976   | 0.174  | 0.948   | 0.261  | 0.978   | 0.884  | 0.980   | 0.511  |
|                    |      | pm10   | 0.669   | <0.001 | 0.604   | <0.001 | 0.781   | <0.001 | 0.551   | <0.001 |
|                    |      | pm11   | 0.998   | 0.439  | 0.995   | 0.815  | 0.998   | 0.814  | 0.994   | 0.509  |
|                    |      | pm12   | 0.994   | 0.484  | 0.985   | 0.776  | 0.999   | 0.335  | 0.982   | 0.836  |
|                    |      | pm13   | 1.008   | 0.834  | 1.022   | 0.908  | 0.984   | 0.472  | 1.023   | 0.154  |
|                    |      | pm14   | 1.077   | 0.836  | 1.060   | 0.735  | 1.082   | 0.803  | 1.092   | 0.130  |
|                    |      | pm15   | 1.456   | <0.001 | 1.607   | <0.001 | 1.412   | <0.001 | 1.438   | <0.001 |
|                    |      | pm16   | 0.588   | <0.001 | 0.446   | <0.001 | 0.620   | <0.001 | 0.670   | <0.001 |
|                    |      | pm17   | 0.648   | <0.001 | 0.499   | <0.001 | 0.616   | <0.001 | 0.754   | <0.001 |
|                    | pm18 | 0.993  | 0.882   | 0.989  | 0.544   | 0.998  | 0.233   | 0.985  | 0.721   |        |

|      |       |        |       |       |       |        |       |        |
|------|-------|--------|-------|-------|-------|--------|-------|--------|
| pm19 | 1.004 | 0.954  | 0.944 | 0.579 | 0.971 | 0.569  | 0.951 | 0.443  |
| pm20 | 0.993 | 0.376  | 0.982 | 0.102 | 0.997 | 0.475  | 0.993 | 0.482  |
| pm21 | 0.672 | <0.001 | 1.056 | 0.799 | 0.486 | <0.001 | 0.854 | 0.014  |
| pm22 | 0.995 | 0.142  | 0.985 | 0.171 | 0.990 | 0.253  | 0.986 | 0.411  |
| pm23 | 1.009 | 0.416  | 0.964 | 0.637 | 0.998 | 0.881  | 0.997 | 0.349  |
| pm24 | 1.000 | 0.167  | 0.981 | 0.168 | 0.999 | 0.869  | 0.998 | 0.295  |
| pm25 | 0.998 | 0.329  | 0.996 | 0.806 | 0.998 | 0.251  | 0.999 | 0.341  |
| pm26 | 0.998 | 0.573  | 0.997 | 0.530 | 0.998 | 0.493  | 0.999 | 0.140  |
| pm27 | 0.980 | 0.193  | 0.940 | 0.816 | 0.973 | 0.790  | 0.988 | 0.709  |
| pm28 | 1.001 | 0.278  | 0.990 | 0.486 | 0.994 | 0.781  | 0.971 | 0.234  |
| pm29 | 0.966 | 0.147  | 0.876 | 0.021 | 0.969 | 0.717  | 0.922 | 0.328  |
| pm30 | 1.018 | 0.898  | 1.055 | 0.325 | 1.005 | 0.185  | 1.035 | 0.394  |
| pm31 | 0.989 | 0.581  | 0.936 | 0.492 | 0.980 | 0.308  | 0.989 | 0.420  |
| pm32 | 0.997 | 0.556  | 0.997 | 0.745 | 0.992 | 0.170  | 0.950 | 0.414  |
| pm33 | 0.988 | 0.253  | 0.930 | 0.836 | 0.986 | 0.595  | 0.859 | 0.011  |
| pm34 | 1.080 | 0.589  | 0.983 | 0.748 | 1.042 | 0.896  | 1.099 | 0.530  |
| pm35 | 0.901 | 0.040  | 0.884 | 0.041 | 0.898 | 0.031  | 0.741 | <0.001 |
| pm36 | 1.000 | 0.243  | 0.997 | 0.774 | 0.999 | 0.503  | 0.998 | 0.498  |
| pm37 | 0.998 | 0.436  | 0.997 | 0.340 | 0.998 | 0.246  | 0.998 | 0.133  |

2b) Result of reverse one-distribution perturbation analysis for hypertrophy when four different response function types were applied in a combined manner

|      | Top 5% |         | Top 10% |         | Top 20% |         |
|------|--------|---------|---------|---------|---------|---------|
|      | Effect | p-value | Effect  | p-value | Effect  | p-value |
| pm1  | 1.005  | 0.325   | 1.004   | 0.126   | 1.003   | 0.720   |
| pm2  | 0.998  | 0.198   | 0.999   | 0.689   | 0.999   | 0.586   |
| pm3  | 0.999  | 0.726   | 0.999   | 0.104   | 0.999   | 0.752   |
| pm4  | 0.997  | 0.980   | 0.997   | 0.963   | 0.998   | 0.588   |
| pm5  | 0.998  | 0.444   | 0.998   | 0.997   | 0.998   | 0.568   |
| pm6  | 0.998  | 0.580   | 0.999   | 0.665   | 0.999   | 0.318   |
| pm7  | 0.177  | <0.001  | 0.269   | <0.001  | 0.503   | <0.001  |
| pm8  | 0.986  | 0.415   | 0.989   | 0.524   | 0.991   | 0.720   |
| pm9  | 0.979  | 0.343   | 0.983   | 0.933   | 0.987   | 0.272   |
| pm10 | 0.685  | <0.001  | 0.759   | <0.001  | 0.795   | <0.001  |
| pm11 | 0.998  | 0.265   | 0.998   | 0.261   | 0.998   | 0.230   |
| pm12 | 0.994  | 0.404   | 0.995   | 0.608   | 0.996   | 0.182   |
| pm13 | 1.008  | 0.692   | 1.006   | 0.655   | 1.005   | 0.548   |
| pm14 | 1.081  | 0.557   | 1.068   | 0.302   | 1.051   | 0.344   |
| pm15 | 1.376  | <0.001  | 1.346   | <0.001  | 1.286   | <0.001  |
| pm16 | 0.634  | <0.001  | 0.693   | <0.001  | 0.747   | <0.001  |
| pm17 | 0.699  | <0.001  | 0.733   | <0.001  | 0.778   | <0.001  |
| pm18 | 0.994  | 0.427   | 0.996   | 0.711   | 0.996   | 0.544   |
| pm19 | 1.003  | 0.768   | 1.003   | 0.165   | 1.002   | 0.738   |
| pm20 | 0.994  | 0.573   | 0.995   | 0.118   | 0.996   | 0.365   |
| pm21 | 1.051  | 0.735   | 1.040   | 0.585   | 1.030   | 0.298   |



|      |       |        |       |       |       |       |
|------|-------|--------|-------|-------|-------|-------|
| pm22 | 0.996 | 0.411  | 0.997 | 0.769 | 0.997 | 0.213 |
| pm23 | 1.008 | 0.571  | 1.006 | 0.779 | 1.006 | 0.695 |
| pm24 | 1.000 | 0.980  | 1.000 | 0.347 | 1.000 | 0.415 |
| pm25 | 0.998 | 0.965  | 0.999 | 0.302 | 0.999 | 0.375 |
| pm26 | 0.998 | 0.147  | 0.999 | 0.571 | 0.999 | 0.196 |
| pm27 | 0.984 | 0.781  | 0.986 | 0.613 | 0.989 | 0.417 |
| pm28 | 1.001 | 0.264  | 1.001 | 0.561 | 1.001 | 0.507 |
| pm29 | 0.969 | 0.200  | 0.972 | 0.558 | 0.977 | 0.567 |
| pm30 | 1.018 | 0.762  | 1.014 | 0.529 | 1.013 | 0.766 |
| pm31 | 0.989 | 0.114  | 0.991 | 0.164 | 0.993 | 0.603 |
| pm32 | 0.998 | 0.864  | 0.998 | 0.334 | 0.998 | 0.381 |
| pm33 | 0.990 | 0.240  | 0.991 | 0.981 | 0.994 | 0.997 |
| pm34 | 1.079 | 0.102  | 1.053 | 0.177 | 1.048 | 0.868 |
| pm35 | 0.718 | <0.001 | 0.827 | 0.007 | 0.896 | 0.034 |
| pm36 | 1.000 | 0.199  | 1.000 | 0.512 | 1.000 | 0.448 |
| pm37 | 0.998 | 0.707  | 0.999 | 0.920 | 0.999 | 0.778 |

3a) Result of two-distribution perturbation analysis for hypertrophy when each response function was separately applied (1 million parameter sets)

| No. | Pair of perturbed parameter distributions | Lin   | Hill  | Sat   | Acc   | Synergistic effect | p-value |
|-----|-------------------------------------------|-------|-------|-------|-------|--------------------|---------|
| 1   | pm1-pm2                                   | 1.001 | 0.984 | 1.017 | 0.995 | -0.014             | 0.31    |
| 2   | pm1-pm3                                   | 1.031 | 1.036 | 0.999 | 1.03  | -0.001             | 0.782   |
| 3   | pm1-pm4                                   | 1.011 | 1.099 | 1.025 | 1.01  | 0.002              | 0.895   |

|    |          |       |       |       |       |        |       |
|----|----------|-------|-------|-------|-------|--------|-------|
| 4  | pml-pm5  | 1.013 | 1.001 | 1.015 | 0.978 | -0.014 | 0.351 |
| 5  | pml-pm6  | 0.988 | 0.995 | 1.001 | 0.979 | -0.02  | 0.314 |
| 6  | pml-pm7  | 2.826 | 2.074 | 2.686 | 2.258 | -0.099 | 0.016 |
| 7  | pml-pm8  | 1.043 | 1.022 | 0.998 | 1.084 | 0.005  | 0.874 |
| 8  | pml-pm9  | 1.038 | 1.067 | 1.047 | 1.037 | -0.005 | 0.72  |
| 9  | pml-pm10 | 1.466 | 1.557 | 1.262 | 1.473 | -0.032 | 0.234 |
| 10 | pml-pm11 | 1.017 | 0.96  | 0.993 | 1.002 | -0.017 | 0.353 |
| 11 | pml-pm12 | 1.01  | 1.054 | 0.997 | 1.014 | -0.007 | 0.49  |
| 12 | pml-pm13 | 0.943 | 0.924 | 0.905 | 0.864 | 0.037  | 0.233 |
| 13 | pml-pm14 | 0.922 | 0.907 | 0.953 | 0.91  | 0.01   | 0.315 |
| 14 | pml-pm15 | 1.083 | 1.222 | 1.127 | 0.989 | -0.072 | 0.015 |
| 15 | pml-pm16 | 1.227 | 1.227 | 1.181 | 1.053 | 0.001  | 0.749 |
| 16 | pml-pm17 | 1.19  | 1.183 | 1.188 | 1.029 | -0.042 | 0.183 |
| 17 | pml-pm18 | 1.028 | 1.032 | 1.033 | 1.025 | 0.007  | 0.408 |
| 18 | pml-pm19 | 0.987 | 1.065 | 1.027 | 1.028 | -0.025 | 0.276 |
| 19 | pml-pm20 | 1.029 | 1.058 | 1.019 | 1.022 | 0.003  | 0.848 |
| 20 | pml-pm21 | 1.528 | 1.099 | 1.857 | 1.228 | -0.015 | 0.381 |
| 21 | pml-pm22 | 1.033 | 1.055 | 1.037 | 0.966 | 0.02   | 0.219 |
| 22 | pml-pm23 | 1.012 | 1.045 | 1.024 | 1.002 | 0.022  | 0.205 |
| 23 | pml-pm24 | 1.013 | 1.064 | 0.998 | 1.008 | 0.002  | 0.662 |
| 24 | pml-pm25 | 1.024 | 1.05  | 1.015 | 1.016 | 0.015  | 0.39  |
| 25 | pml-pm26 | 0.994 | 1.031 | 1.017 | 0.988 | -0.003 | 0.612 |
| 26 | pml-pm27 | 1.039 | 1.049 | 1.019 | 0.996 | -0.019 | 0.331 |
| 27 | pml-pm28 | 1.025 | 1.064 | 1.006 | 1.011 | 0      | 0.648 |
| 28 | pml-pm29 | 1.013 | 1.068 | 1.012 | 1.041 | 0.015  | 0.394 |
| 29 | pml-pm30 | 1.05  | 1.016 | 1.021 | 0.983 | -0.006 | 0.497 |
| 30 | pml-pm31 | 1.019 | 1.101 | 1.04  | 0.992 | -0.011 | 0.306 |
| 31 | pml-pm32 | 1.01  | 1.039 | 0.995 | 1.083 | -0.002 | 0.818 |
| 32 | pml-pm33 | 1.027 | 1.15  | 1.006 | 1.13  | -0.018 | 0.334 |
| 33 | pml-pm34 | 0.982 | 1.043 | 0.956 | 1.108 | -0.001 | 0.759 |

|    |          |       |       |       |       |        |       |
|----|----------|-------|-------|-------|-------|--------|-------|
| 34 | pm1-pm35 | 1.013 | 1.077 | 0.955 | 1.106 | 0      | 0.84  |
| 35 | pm1-pm36 | 1.042 | 1.033 | 1.015 | 0.979 | 0.006  | 0.548 |
| 36 | pm1-pm37 | 1.033 | 1.002 | 1.009 | 0.997 | 0      | 0.728 |
| 37 | pm2-pm3  | 0.972 | 0.973 | 0.991 | 1.033 | -0.018 | 0.39  |
| 38 | pm2-pm4  | 0.975 | 1.07  | 1.013 | 1.001 | -0.005 | 0.544 |
| 39 | pm2-pm5  | 1.017 | 0.97  | 0.997 | 1.029 | 0.001  | 0.949 |
| 40 | pm2-pm6  | 1.019 | 0.971 | 0.988 | 0.985 | -0.006 | 0.455 |
| 41 | pm2-pm7  | 2.838 | 1.959 | 2.588 | 2.249 | -0.137 | 0.008 |
| 42 | pm2-pm8  | 1.008 | 1.004 | 0.994 | 1.043 | -0.005 | 0.583 |
| 43 | pm2-pm9  | 1.032 | 1.063 | 1.005 | 1.056 | 0.001  | 0.827 |
| 44 | pm2-pm10 | 1.426 | 1.511 | 1.276 | 1.484 | -0.033 | 0.268 |
| 45 | pm2-pm11 | 1.004 | 0.986 | 0.981 | 1.021 | 0.002  | 0.994 |
| 46 | pm2-pm12 | 0.997 | 1.04  | 0.993 | 1.003 | -0.003 | 0.643 |
| 47 | pm2-pm13 | 0.886 | 0.841 | 0.929 | 0.864 | 0.022  | 0.249 |
| 48 | pm2-pm14 | 0.898 | 0.85  | 0.939 | 0.895 | -0.003 | 0.661 |
| 49 | pm2-pm15 | 1.069 | 1.19  | 1.133 | 1.034 | -0.057 | 0.044 |
| 50 | pm2-pm16 | 1.124 | 1.154 | 1.147 | 1.063 | -0.036 | 0.296 |
| 51 | pm2-pm17 | 1.14  | 1.171 | 1.187 | 1.035 | -0.042 | 0.176 |
| 52 | pm2-pm18 | 1.013 | 1.01  | 0.984 | 1.016 | -0.003 | 0.719 |
| 53 | pm2-pm19 | 0.992 | 1.049 | 1.03  | 1.033 | -0.012 | 0.389 |
| 54 | pm2-pm20 | 1.018 | 1.009 | 1.006 | 1.053 | 0.007  | 0.43  |
| 55 | pm2-pm21 | 1.561 | 1.074 | 1.874 | 1.222 | 0.004  | 0.83  |
| 56 | pm2-pm22 | 0.996 | 1.035 | 0.993 | 0.989 | 0.015  | 0.379 |
| 57 | pm2-pm23 | 0.991 | 1.043 | 0.98  | 1.005 | 0.019  | 0.383 |
| 58 | pm2-pm24 | 1.01  | 1.042 | 0.989 | 0.984 | 0.001  | 0.604 |
| 59 | pm2-pm25 | 0.989 | 1.005 | 0.995 | 1.011 | 0.003  | 0.965 |
| 60 | pm2-pm26 | 1.004 | 0.997 | 1.003 | 1.019 | 0.009  | 0.448 |
| 61 | pm2-pm27 | 1.011 | 1.07  | 1.007 | 0.988 | -0.012 | 0.335 |
| 62 | pm2-pm28 | 1.016 | 1.019 | 1.013 | 1.027 | 0.006  | 0.516 |
| 63 | pm2-pm29 | 1     | 1.021 | 0.973 | 0.992 | -0.008 | 0.437 |

|    |          |       |       |       |       |        |       |
|----|----------|-------|-------|-------|-------|--------|-------|
| 64 | pm2-pm30 | 1.034 | 1.055 | 0.991 | 0.999 | 0.011  | 0.372 |
| 65 | pm2-pm31 | 1.042 | 1.113 | 1.047 | 1.014 | 0.019  | 0.365 |
| 66 | pm2-pm32 | 1     | 1.015 | 1.025 | 1.066 | 0.007  | 0.42  |
| 67 | pm2-pm33 | 1.024 | 1.162 | 1.005 | 1.136 | 0      | 0.735 |
| 68 | pm2-pm34 | 1.002 | 1.047 | 0.952 | 1.06  | 0.006  | 0.506 |
| 69 | pm2-pm35 | 1     | 1.025 | 0.968 | 1.121 | 0.005  | 0.904 |
| 70 | pm2-pm36 | 1.009 | 1.032 | 1     | 1.017 | 0.017  | 0.333 |
| 71 | pm2-pm37 | 1.025 | 1.017 | 0.995 | 1.02  | 0.018  | 0.367 |
| 72 | pm3-pm4  | 1.001 | 1.104 | 1     | 1.025 | 0.001  | 0.997 |
| 73 | pm3-pm5  | 0.994 | 1.021 | 1.003 | 1.018 | -0.004 | 0.989 |
| 74 | pm3-pm6  | 1.027 | 0.99  | 0.993 | 1.033 | 0.003  | 0.883 |
| 75 | pm3-pm7  | 2.869 | 1.965 | 2.668 | 2.247 | -0.12  | 0.01  |
| 76 | pm3-pm8  | 1.013 | 1.012 | 0.991 | 1.078 | -0.006 | 0.595 |
| 77 | pm3-pm9  | 1.055 | 1.076 | 1.064 | 1.051 | 0.012  | 0.399 |
| 78 | pm3-pm10 | 1.466 | 1.487 | 1.216 | 1.544 | -0.04  | 0.186 |
| 79 | pm3-pm11 | 0.99  | 1.014 | 0.975 | 1.013 | -0.009 | 0.433 |
| 80 | pm3-pm12 | 1.027 | 1.045 | 1.022 | 1.025 | 0.007  | 0.439 |
| 81 | pm3-pm13 | 0.948 | 0.873 | 0.904 | 0.849 | 0.024  | 0.274 |
| 82 | pm3-pm14 | 0.911 | 0.957 | 0.901 | 0.888 | 0.004  | 0.931 |
| 83 | pm3-pm15 | 1.106 | 1.203 | 1.097 | 1.062 | -0.057 | 0.039 |
| 84 | pm3-pm16 | 1.176 | 1.174 | 1.146 | 1.104 | -0.019 | 0.333 |
| 85 | pm3-pm17 | 1.16  | 1.203 | 1.173 | 1.098 | -0.029 | 0.267 |
| 86 | pm3-pm18 | 1.019 | 1.01  | 1     | 1.025 | -0.006 | 0.506 |
| 87 | pm3-pm19 | 1.008 | 1.054 | 1.047 | 1.026 | -0.016 | 0.334 |
| 88 | pm3-pm20 | 1.022 | 0.987 | 1.013 | 1.03  | -0.013 | 0.345 |
| 89 | pm3-pm21 | 1.512 | 1.155 | 1.821 | 1.201 | -0.018 | 0.34  |
| 90 | pm3-pm22 | 0.975 | 1.064 | 0.96  | 0.993 | -0.002 | 0.969 |
| 91 | pm3-pm23 | 0.987 | 1.071 | 0.987 | 1.026 | 0.021  | 0.257 |
| 92 | pm3-pm24 | 0.972 | 1.05  | 1.009 | 1.041 | 0.002  | 0.687 |
| 93 | pm3-pm25 | 1.017 | 0.99  | 0.975 | 0.998 | -0.013 | 0.371 |

|     |          |       |       |       |       |        |       |
|-----|----------|-------|-------|-------|-------|--------|-------|
| 94  | pm3-pm26 | 1.016 | 1.012 | 0.996 | 1.029 | 0.005  | 0.468 |
| 95  | pm3-pm27 | 1     | 1.066 | 0.998 | 1.035 | -0.017 | 0.368 |
| 96  | pm3-pm28 | 0.996 | 1.02  | 1.006 | 1.031 | -0.011 | 0.358 |
| 97  | pm3-pm29 | 1.02  | 1.038 | 1.031 | 1.04  | 0.016  | 0.346 |
| 98  | pm3-pm30 | 1.043 | 1.055 | 0.986 | 1.022 | 0.006  | 0.465 |
| 99  | pm3-pm31 | 1.024 | 1.056 | 1.004 | 1.027 | -0.018 | 0.32  |
| 100 | pm3-pm32 | 1.008 | 1.018 | 0.965 | 1.103 | -0.007 | 0.567 |
| 101 | pm3-pm33 | 0.981 | 1.106 | 0.993 | 1.202 | -0.022 | 0.285 |
| 102 | pm3-pm34 | 1.035 | 1.04  | 0.936 | 1.103 | 0.008  | 0.524 |
| 103 | pm3-pm35 | 1.041 | 1.025 | 0.937 | 1.117 | -0.005 | 0.425 |
| 104 | pm3-pm36 | 1.016 | 1.002 | 0.992 | 1.011 | -0.003 | 0.817 |
| 105 | pm3-pm37 | 0.998 | 1.007 | 0.981 | 1.004 | -0.01  | 0.371 |
| 106 | pm4-pm5  | 1.014 | 1.11  | 0.999 | 1.023 | 0.014  | 0.388 |
| 107 | pm4-pm6  | 1.006 | 1.095 | 1.007 | 1.013 | 0.013  | 0.308 |
| 108 | pm4-pm7  | 2.81  | 2.098 | 2.643 | 2.296 | -0.105 | 0.006 |
| 109 | pm4-pm8  | 1.019 | 1.092 | 1.006 | 1.031 | -0.002 | 0.853 |
| 110 | pm4-pm9  | 1.055 | 1.15  | 1.036 | 1.051 | 0.014  | 0.324 |
| 111 | pm4-pm10 | 1.44  | 1.561 | 1.263 | 1.541 | -0.027 | 0.266 |
| 112 | pm4-pm11 | 1.014 | 1.073 | 0.997 | 1.015 | 0.008  | 0.58  |
| 113 | pm4-pm12 | 1.008 | 1.107 | 1.013 | 1.023 | 0.006  | 0.517 |
| 114 | pm4-pm13 | 0.888 | 0.938 | 0.942 | 0.879 | 0.033  | 0.299 |
| 115 | pm4-pm14 | 0.917 | 0.936 | 0.938 | 0.908 | 0.005  | 0.484 |
| 116 | pm4-pm15 | 1.098 | 1.267 | 1.128 | 1.022 | -0.055 | 0.04  |
| 117 | pm4-pm16 | 1.161 | 1.267 | 1.153 | 1.086 | -0.011 | 0.341 |
| 118 | pm4-pm17 | 1.166 | 1.23  | 1.221 | 1.079 | -0.023 | 0.224 |
| 119 | pm4-pm18 | 1.015 | 1.091 | 1.01  | 1.041 | 0.01   | 0.578 |
| 120 | pm4-pm19 | 0.988 | 1.107 | 1.047 | 1.047 | -0.012 | 0.362 |
| 121 | pm4-pm20 | 1.033 | 1.109 | 1.003 | 1.015 | 0.004  | 0.613 |
| 122 | pm4-pm21 | 1.511 | 1.164 | 1.818 | 1.188 | -0.03  | 0.224 |
| 123 | pm4-pm22 | 1.002 | 1.131 | 0.991 | 1     | 0.021  | 0.2   |

|     |          |       |       |       |       |        |       |
|-----|----------|-------|-------|-------|-------|--------|-------|
| 124 | pm4-pm23 | 1.015 | 1.139 | 1.017 | 1.025 | 0.043  | 0.165 |
| 125 | pm4-pm24 | 1.005 | 1.14  | 1.021 | 1.004 | 0.017  | 0.334 |
| 126 | pm4-pm25 | 0.994 | 1.104 | 1.011 | 0.992 | 0.008  | 0.489 |
| 127 | pm4-pm26 | 0.993 | 1.115 | 0.985 | 1.013 | 0.009  | 0.43  |
| 128 | pm4-pm27 | 1.004 | 1.13  | 1.022 | 1.027 | -0.006 | 0.6   |
| 129 | pm4-pm28 | 1.012 | 1.102 | 1.001 | 1.025 | 0.001  | 0.748 |
| 130 | pm4-pm29 | 1.014 | 1.16  | 1.002 | 1.042 | 0.029  | 0.244 |
| 131 | pm4-pm30 | 1.016 | 1.092 | 1.01  | 1.022 | 0.005  | 0.731 |
| 132 | pm4-pm31 | 1.034 | 1.183 | 1.018 | 1.033 | 0.011  | 0.321 |
| 133 | pm4-pm32 | 0.988 | 1.094 | 0.998 | 1.038 | -0.011 | 0.342 |
| 134 | pm4-pm33 | 0.996 | 1.158 | 0.969 | 1.203 | -0.021 | 0.291 |
| 135 | pm4-pm34 | 0.985 | 1.141 | 0.926 | 1.079 | 0.003  | 0.833 |
| 136 | pm4-pm35 | 1.018 | 1.102 | 0.933 | 1.131 | 0.001  | 0.793 |
| 137 | pm4-pm36 | 0.996 | 1.042 | 1.008 | 0.98  | -0.012 | 0.308 |
| 138 | pm4-pm37 | 1.009 | 1.075 | 1.007 | 1.015 | 0.009  | 0.472 |
| 139 | pm5-pm6  | 0.981 | 0.984 | 1.003 | 0.998 | -0.007 | 0.479 |
| 140 | pm5-pm7  | 2.845 | 2.009 | 2.656 | 2.267 | -0.104 | 0.009 |
| 141 | pm5-pm8  | 1.039 | 1.003 | 0.994 | 1.058 | 0.003  | 0.878 |
| 142 | pm5-pm9  | 1.076 | 1.084 | 1.035 | 1.013 | 0.011  | 0.341 |
| 143 | pm5-pm10 | 1.431 | 1.486 | 1.212 | 1.488 | -0.056 | 0.021 |
| 144 | pm5-pm11 | 1.014 | 0.99  | 0.99  | 1.019 | 0.005  | 0.693 |
| 145 | pm5-pm12 | 1.017 | 1.027 | 0.986 | 1.014 | -0.003 | 0.942 |
| 146 | pm5-pm13 | 0.923 | 0.848 | 0.907 | 0.836 | 0.018  | 0.377 |
| 147 | pm5-pm14 | 0.948 | 0.92  | 0.956 | 0.913 | 0.034  | 0.282 |
| 148 | pm5-pm15 | 1.122 | 1.145 | 1.121 | 1.011 | -0.066 | 0.035 |
| 149 | pm5-pm16 | 1.136 | 1.167 | 1.122 | 1.071 | -0.035 | 0.25  |
| 150 | pm5-pm17 | 1.16  | 1.145 | 1.21  | 1.044 | -0.038 | 0.243 |
| 151 | pm5-pm18 | 1.049 | 0.987 | 0.995 | 1.016 | 0.001  | 0.609 |
| 152 | pm5-pm19 | 1.005 | 1.009 | 1.008 | 1.059 | -0.02  | 0.278 |
| 153 | pm5-pm20 | 1.021 | 1.036 | 1.007 | 1.016 | 0.003  | 0.965 |

|     |          |       |       |       |       |        |       |
|-----|----------|-------|-------|-------|-------|--------|-------|
| 154 | pm5-pm21 | 1.534 | 1.093 | 1.86  | 1.208 | -0.008 | 0.523 |
| 155 | pm5-pm22 | 1.01  | 1.017 | 1.02  | 1.025 | 0.027  | 0.28  |
| 156 | pm5-pm23 | 1.03  | 1.075 | 1.005 | 1.016 | 0.044  | 0.179 |
| 157 | pm5-pm24 | 0.974 | 1.046 | 0.986 | 1.013 | -0.002 | 0.842 |
| 158 | pm5-pm25 | 1.001 | 0.966 | 1.018 | 0.998 | -0.003 | 0.893 |
| 159 | pm5-pm26 | 0.99  | 0.994 | 1.006 | 1.005 | 0      | 0.69  |
| 160 | pm5-pm27 | 1.018 | 1.081 | 1.025 | 1.024 | 0.004  | 0.828 |
| 161 | pm5-pm28 | 1.009 | 0.992 | 1.012 | 1.033 | -0.004 | 0.836 |
| 162 | pm5-pm29 | 1.005 | 1.037 | 0.982 | 1.015 | 0.003  | 0.722 |
| 163 | pm5-pm30 | 1.063 | 1.028 | 1.009 | 1.027 | 0.02   | 0.21  |
| 164 | pm5-pm31 | 1.031 | 1.059 | 1.034 | 1.015 | -0.002 | 0.967 |
| 165 | pm5-pm32 | 1.01  | 0.988 | 1.002 | 1.082 | -0.001 | 0.759 |
| 166 | pm5-pm33 | 1.022 | 1.151 | 0.996 | 1.137 | -0.007 | 0.501 |
| 167 | pm5-pm34 | 0.994 | 1.015 | 0.95  | 1.069 | -0.004 | 0.633 |
| 168 | pm5-pm35 | 1.009 | 1.035 | 0.939 | 1.117 | -0.001 | 0.78  |
| 169 | pm5-pm36 | 1.002 | 0.989 | 0.98  | 0.994 | -0.009 | 0.538 |
| 170 | pm5-pm37 | 1.012 | 0.975 | 1.004 | 1.031 | 0.007  | 0.433 |
| 171 | pm6-pm7  | 2.818 | 2.029 | 2.689 | 2.235 | -0.1   | 0.01  |
| 172 | pm6-pm8  | 1.035 | 1.012 | 1.009 | 1.043 | 0.01   | 0.582 |
| 173 | pm6-pm9  | 1.068 | 1.065 | 1.007 | 1.025 | 0.006  | 0.475 |
| 174 | pm6-pm10 | 1.402 | 1.488 | 1.262 | 1.508 | -0.04  | 0.22  |
| 175 | pm6-pm11 | 0.977 | 1.009 | 1.015 | 0.998 | 0.006  | 0.505 |
| 176 | pm6-pm12 | 0.998 | 1.029 | 1.001 | 1.006 | 0      | 0.663 |
| 177 | pm6-pm13 | 0.85  | 0.865 | 0.927 | 0.831 | 0.013  | 0.333 |
| 178 | pm6-pm14 | 0.93  | 0.899 | 0.899 | 0.872 | 0.004  | 0.975 |
| 179 | pm6-pm15 | 1.101 | 1.208 | 1.118 | 0.999 | -0.054 | 0.04  |
| 180 | pm6-pm16 | 1.151 | 1.156 | 1.182 | 1.058 | -0.018 | 0.319 |
| 181 | pm6-pm17 | 1.14  | 1.204 | 1.194 | 1.035 | -0.03  | 0.243 |
| 182 | pm6-pm18 | 1.042 | 1.013 | 0.999 | 1.045 | 0.019  | 0.342 |
| 183 | pm6-pm19 | 0.996 | 1.108 | 1.029 | 1.032 | 0.006  | 0.48  |

|     |          |       |       |       |       |        |        |
|-----|----------|-------|-------|-------|-------|--------|--------|
| 184 | pm6-pm20 | 1.04  | 1.018 | 1.011 | 1.016 | 0.009  | 0.428  |
| 185 | pm6-pm21 | 1.51  | 1.173 | 1.877 | 1.225 | 0.02   | 0.209  |
| 186 | pm6-pm22 | 0.983 | 1.058 | 1.011 | 0.977 | 0.022  | 0.272  |
| 187 | pm6-pm23 | 0.987 | 1.045 | 0.993 | 0.968 | 0.016  | 0.352  |
| 188 | pm6-pm24 | 1.007 | 1.003 | 0.985 | 0.985 | -0.007 | 0.545  |
| 189 | pm6-pm25 | 1.015 | 1.01  | 1.011 | 0.99  | 0.013  | 0.37   |
| 190 | pm6-pm26 | 1.01  | 0.989 | 1.02  | 1.015 | 0.015  | 0.377  |
| 191 | pm6-pm27 | 1.025 | 1.045 | 1.035 | 0.998 | -0.002 | 0.659  |
| 192 | pm6-pm28 | 1.033 | 1.019 | 1.011 | 1.019 | 0.01   | 0.322  |
| 193 | pm6-pm29 | 0.982 | 1.035 | 0.989 | 1.01  | 0.002  | 0.85   |
| 194 | pm6-pm30 | 1.04  | 1.044 | 1.021 | 1.013 | 0.023  | 0.274  |
| 195 | pm6-pm31 | 1.039 | 1.089 | 1.034 | 1.021 | 0.014  | 0.359  |
| 196 | pm6-pm32 | 0.994 | 1.026 | 1.007 | 1.078 | 0.01   | 0.581  |
| 197 | pm6-pm33 | 1.015 | 1.115 | 0.984 | 1.179 | -0.006 | 0.536  |
| 198 | pm6-pm34 | 0.997 | 1.001 | 0.921 | 1.09  | -0.004 | 0.833  |
| 199 | pm6-pm35 | 0.999 | 1.062 | 0.935 | 1.134 | 0.012  | 0.375  |
| 200 | pm6-pm36 | 1.004 | 0.987 | 0.983 | 0.986 | -0.005 | 0.697  |
| 201 | pm6-pm37 | 0.986 | 0.976 | 1     | 0.99  | -0.006 | 0.571  |
| 202 | pm7-pm8  | 2.855 | 2.001 | 2.605 | 2.303 | -0.124 | 0.01   |
| 203 | pm7-pm9  | 2.923 | 2.136 | 2.703 | 2.264 | -0.079 | 0.015  |
| 204 | pm7-pm10 | 3.856 | 3.011 | 3.241 | 3.323 | 0.354  | <0.001 |
| 205 | pm7-pm11 | 2.832 | 1.996 | 2.606 | 2.252 | -0.121 | 0.008  |
| 206 | pm7-pm12 | 2.805 | 2.032 | 2.617 | 2.279 | -0.125 | 0.005  |
| 207 | pm7-pm13 | 2.873 | 2.13  | 2.812 | 2.331 | 0.132  | 0.007  |
| 208 | pm7-pm14 | 2.983 | 2.183 | 2.909 | 2.382 | 0.169  | 0.003  |
| 209 | pm7-pm15 | 3.058 | 2.416 | 2.904 | 2.343 | -0.03  | 0.278  |
| 210 | pm7-pm16 | 3.168 | 2.317 | 3.092 | 2.388 | 0.037  | 0.285  |
| 211 | pm7-pm17 | 3.203 | 2.306 | 3.132 | 2.354 | 0.026  | 0.251  |
| 212 | pm7-pm18 | 2.813 | 2.024 | 2.645 | 2.303 | -0.109 | 0.007  |
| 213 | pm7-pm19 | 2.803 | 2.011 | 2.739 | 2.271 | -0.129 | 0.007  |



|     |          |       |       |       |       |        |        |
|-----|----------|-------|-------|-------|-------|--------|--------|
| 214 | pm7-pm20 | 2.855 | 2.017 | 2.654 | 2.252 | -0.117 | 0.007  |
| 215 | pm7-pm21 | 4.082 | 2.207 | 4.566 | 2.705 | 0.414  | <0.001 |
| 216 | pm7-pm22 | 2.757 | 2.069 | 2.671 | 2.285 | -0.09  | 0.015  |
| 217 | pm7-pm23 | 2.804 | 2.103 | 2.634 | 2.263 | -0.081 | 0.015  |
| 218 | pm7-pm24 | 2.84  | 2.027 | 2.625 | 2.211 | -0.126 | 0.009  |
| 219 | pm7-pm25 | 2.792 | 2.044 | 2.633 | 2.233 | -0.118 | 0.01   |
| 220 | pm7-pm26 | 2.734 | 2.019 | 2.64  | 2.266 | -0.129 | 0.005  |
| 221 | pm7-pm27 | 2.83  | 2.096 | 2.699 | 2.222 | -0.116 | 0.007  |
| 222 | pm7-pm28 | 2.876 | 2.045 | 2.652 | 2.257 | -0.102 | 0.009  |
| 223 | pm7-pm29 | 2.852 | 2.015 | 2.646 | 2.266 | -0.107 | 0.005  |
| 224 | pm7-pm30 | 2.81  | 2.065 | 2.617 | 2.275 | -0.114 | 0.009  |
| 225 | pm7-pm31 | 2.897 | 2.169 | 2.685 | 2.295 | -0.07  | 0.012  |
| 226 | pm7-pm32 | 2.845 | 2.014 | 2.641 | 2.364 | -0.1   | 0.008  |
| 227 | pm7-pm33 | 2.807 | 2.247 | 2.737 | 2.508 | -0.054 | 0.043  |
| 228 | pm7-pm34 | 2.882 | 2.065 | 2.537 | 2.304 | -0.109 | 0.007  |
| 229 | pm7-pm35 | 2.902 | 2.128 | 2.528 | 2.485 | -0.06  | 0.021  |
| 230 | pm7-pm36 | 2.859 | 1.908 | 2.673 | 2.244 | -0.123 | 0.01   |
| 231 | pm7-pm37 | 2.824 | 1.944 | 2.672 | 2.212 | -0.13  | 0.01   |
| 232 | pm8-pm9  | 1.043 | 1.122 | 1.029 | 1.106 | 0.018  | 0.332  |
| 233 | pm8-pm10 | 1.439 | 1.456 | 1.268 | 1.554 | -0.047 | 0.18   |
| 234 | pm8-pm11 | 1.03  | 0.994 | 0.998 | 1.065 | 0.007  | 0.512  |
| 235 | pm8-pm12 | 1.042 | 1.036 | 0.998 | 1.03  | -0.003 | 0.887  |
| 236 | pm8-pm13 | 0.954 | 0.874 | 0.923 | 0.865 | 0.027  | 0.28   |
| 237 | pm8-pm14 | 0.927 | 0.855 | 0.945 | 0.914 | -0.007 | 0.489  |
| 238 | pm8-pm15 | 1.097 | 1.194 | 1.101 | 1.066 | -0.067 | 0.032  |
| 239 | pm8-pm16 | 1.181 | 1.186 | 1.132 | 1.133 | -0.018 | 0.349  |
| 240 | pm8-pm17 | 1.176 | 1.175 | 1.175 | 1.087 | -0.041 | 0.16   |
| 241 | pm8-pm18 | 1.044 | 1.025 | 1.019 | 1.064 | 0.011  | 0.361  |
| 242 | pm8-pm19 | 0.989 | 1.062 | 1.037 | 1.099 | -0.01  | 0.588  |
| 243 | pm8-pm20 | 1.053 | 1.056 | 1.011 | 1.047 | 0.008  | 0.415  |

|     |          |       |       |       |       |        |       |
|-----|----------|-------|-------|-------|-------|--------|-------|
| 244 | pm8-pm21 | 1.536 | 1.115 | 1.842 | 1.24  | -0.015 | 0.363 |
| 245 | pm8-pm22 | 1.051 | 1.079 | 0.999 | 1.029 | 0.032  | 0.237 |
| 246 | pm8-pm23 | 0.988 | 1.076 | 0.983 | 1.016 | 0.012  | 0.346 |
| 247 | pm8-pm24 | 1.018 | 1.037 | 1.006 | 1.026 | -0.001 | 0.885 |
| 248 | pm8-pm25 | 1.029 | 1.009 | 1.002 | 1.051 | 0.007  | 0.569 |
| 249 | pm8-pm26 | 1.009 | 1.017 | 1.013 | 1.065 | 0.011  | 0.334 |
| 250 | pm8-pm27 | 1.039 | 1.043 | 1.019 | 1.032 | -0.016 | 0.397 |
| 251 | pm8-pm28 | 1.014 | 1.005 | 0.994 | 1.059 | -0.014 | 0.323 |
| 252 | pm8-pm29 | 1.039 | 1.092 | 1.029 | 1.062 | 0.032  | 0.279 |
| 253 | pm8-pm30 | 1.062 | 1.025 | 1.004 | 1.038 | 0.004  | 0.909 |
| 254 | pm8-pm31 | 1.077 | 1.122 | 1.066 | 1.031 | 0.021  | 0.214 |
| 255 | pm8-pm32 | 0.998 | 1.065 | 0.976 | 1.146 | 0.008  | 0.405 |
| 256 | pm8-pm33 | 0.987 | 1.134 | 1.018 | 1.203 | -0.015 | 0.324 |
| 257 | pm8-pm34 | 1.005 | 1.015 | 0.917 | 1.101 | -0.018 | 0.391 |
| 258 | pm8-pm35 | 1.036 | 1.059 | 0.976 | 1.183 | 0.021  | 0.202 |
| 259 | pm8-pm36 | 1.021 | 0.982 | 1.026 | 1.034 | -0.001 | 0.81  |
| 260 | pm8-pm37 | 1.025 | 1.02  | 0.995 | 1.079 | 0.015  | 0.38  |
| 261 | pm9-pm10 | 1.455 | 1.572 | 1.296 | 1.512 | -0.038 | 0.245 |
| 262 | pm9-pm11 | 1.089 | 1.064 | 1.014 | 1.024 | 0.013  | 0.392 |
| 263 | pm9-pm12 | 1.084 | 1.116 | 1.029 | 1.028 | 0.014  | 0.327 |
| 264 | pm9-pm13 | 0.937 | 0.916 | 0.912 | 0.894 | 0.018  | 0.343 |
| 265 | pm9-pm14 | 0.958 | 0.905 | 0.943 | 0.911 | -0.008 | 0.583 |
| 266 | pm9-pm15 | 1.174 | 1.268 | 1.174 | 1.083 | -0.027 | 0.255 |
| 267 | pm9-pm16 | 1.232 | 1.252 | 1.184 | 1.097 | -0.005 | 0.959 |
| 268 | pm9-pm17 | 1.224 | 1.207 | 1.256 | 1.088 | -0.021 | 0.249 |
| 269 | pm9-pm18 | 1.069 | 1.121 | 1.016 | 1.07  | 0.021  | 0.282 |
| 270 | pm9-pm19 | 1.045 | 1.12  | 1.043 | 1.093 | -0.002 | 0.996 |
| 271 | pm9-pm20 | 1.073 | 1.076 | 1.001 | 1.043 | -0.006 | 0.547 |
| 272 | pm9-pm21 | 1.627 | 1.177 | 1.892 | 1.291 | 0.029  | 0.298 |
| 273 | pm9-pm22 | 1.062 | 1.147 | 1.003 | 1.008 | 0.027  | 0.225 |

|     |           |       |       |       |       |        |       |
|-----|-----------|-------|-------|-------|-------|--------|-------|
| 274 | pm9-pm23  | 1.065 | 1.122 | 1.008 | 1.048 | 0.037  | 0.216 |
| 275 | pm9-pm24  | 1.038 | 1.143 | 1.023 | 1.019 | 0.012  | 0.343 |
| 276 | pm9-pm25  | 1.069 | 1.094 | 1.042 | 1.032 | 0.023  | 0.235 |
| 277 | pm9-pm26  | 1.041 | 1.064 | 1.025 | 1.039 | 0.006  | 0.589 |
| 278 | pm9-pm27  | 1.07  | 1.182 | 1.072 | 1.056 | 0.025  | 0.265 |
| 279 | pm9-pm28  | 1.06  | 1.117 | 0.998 | 1.044 | 0.003  | 0.631 |
| 280 | pm9-pm29  | 1.062 | 1.157 | 1.041 | 1.018 | 0.026  | 0.287 |
| 281 | pm9-pm30  | 1.097 | 1.105 | 1.021 | 1.063 | 0.023  | 0.259 |
| 282 | pm9-pm31  | 1.081 | 1.182 | 1.042 | 1.042 | 0.013  | 0.373 |
| 283 | pm9-pm32  | 1.065 | 1.113 | 1.011 | 1.08  | 0.009  | 0.478 |
| 284 | pm9-pm33  | 1.024 | 1.16  | 0.982 | 1.147 | -0.043 | 0.185 |
| 285 | pm9-pm34  | 1.012 | 1.116 | 0.981 | 1.109 | 0.007  | 0.541 |
| 286 | pm9-pm35  | 1.069 | 1.141 | 0.995 | 1.107 | 0.015  | 0.302 |
| 287 | pm9-pm36  | 1.046 | 1.08  | 1.046 | 1.036 | 0.015  | 0.357 |
| 288 | pm9-pm37  | 1.052 | 1.061 | 1.014 | 1.031 | 0.004  | 0.841 |
| 289 | pm10-pm11 | 1.479 | 1.527 | 1.257 | 1.488 | -0.017 | 0.338 |
| 290 | pm10-pm12 | 1.454 | 1.59  | 1.258 | 1.502 | -0.019 | 0.365 |
| 291 | pm10-pm13 | 1.298 | 1.312 | 1.201 | 1.243 | -0.053 | 0.041 |
| 292 | pm10-pm14 | 1.529 | 1.501 | 1.384 | 1.51  | 0.124  | 0.008 |
| 293 | pm10-pm15 | 1.569 | 1.806 | 1.379 | 1.527 | -0.051 | 0.043 |
| 294 | pm10-pm16 | 1.571 | 1.723 | 1.441 | 1.545 | -0.046 | 0.151 |
| 295 | pm10-pm17 | 1.624 | 1.708 | 1.477 | 1.543 | -0.046 | 0.181 |
| 296 | pm10-pm18 | 1.412 | 1.483 | 1.276 | 1.557 | -0.035 | 0.272 |
| 297 | pm10-pm19 | 1.437 | 1.606 | 1.317 | 1.541 | -0.021 | 0.228 |
| 298 | pm10-pm20 | 1.441 | 1.516 | 1.26  | 1.475 | -0.05  | 0.029 |
| 299 | pm10-pm21 | 1.989 | 1.577 | 2.148 | 1.71  | -0.032 | 0.261 |
| 300 | pm10-pm22 | 1.35  | 1.613 | 1.249 | 1.456 | -0.03  | 0.285 |
| 301 | pm10-pm23 | 1.417 | 1.497 | 1.252 | 1.46  | -0.037 | 0.283 |
| 302 | pm10-pm24 | 1.418 | 1.531 | 1.288 | 1.469 | -0.037 | 0.293 |
| 303 | pm10-pm25 | 1.459 | 1.474 | 1.252 | 1.512 | -0.031 | 0.231 |

|     |           |       |       |       |       |        |       |
|-----|-----------|-------|-------|-------|-------|--------|-------|
| 304 | pm10-pm26 | 1.383 | 1.485 | 1.255 | 1.444 | -0.063 | 0.036 |
| 305 | pm10-pm27 | 1.429 | 1.602 | 1.285 | 1.525 | -0.029 | 0.261 |
| 306 | pm10-pm28 | 1.466 | 1.548 | 1.267 | 1.513 | -0.023 | 0.278 |
| 307 | pm10-pm29 | 1.411 | 1.547 | 1.261 | 1.465 | -0.042 | 0.156 |
| 308 | pm10-pm30 | 1.406 | 1.553 | 1.216 | 1.516 | -0.045 | 0.186 |
| 309 | pm10-pm31 | 1.468 | 1.643 | 1.301 | 1.513 | -0.012 | 0.361 |
| 310 | pm10-pm32 | 1.435 | 1.568 | 1.254 | 1.611 | -0.011 | 0.315 |
| 311 | pm10-pm33 | 1.45  | 1.61  | 1.269 | 1.721 | -0.028 | 0.264 |
| 312 | pm10-pm34 | 1.451 | 1.547 | 1.188 | 1.556 | -0.032 | 0.232 |
| 313 | pm10-pm35 | 1.442 | 1.554 | 1.208 | 1.594 | -0.033 | 0.299 |
| 314 | pm10-pm36 | 1.416 | 1.488 | 1.269 | 1.479 | -0.043 | 0.169 |
| 315 | pm10-pm37 | 1.429 | 1.432 | 1.275 | 1.475 | -0.052 | 0.035 |
| 316 | pm11-pm12 | 1.019 | 1.008 | 1.024 | 1.011 | 0.007  | 0.442 |
| 317 | pm11-pm13 | 0.909 | 0.836 | 0.916 | 0.815 | 0.014  | 0.362 |
| 318 | pm11-pm14 | 0.908 | 0.828 | 0.93  | 0.9   | -0.004 | 0.937 |
| 319 | pm11-pm15 | 1.112 | 1.182 | 1.115 | 1.058 | -0.044 | 0.187 |
| 320 | pm11-pm16 | 1.181 | 1.165 | 1.145 | 1.066 | -0.015 | 0.36  |
| 321 | pm11-pm17 | 1.174 | 1.155 | 1.202 | 1.032 | -0.032 | 0.207 |
| 322 | pm11-pm18 | 1.034 | 1.01  | 1.008 | 1.037 | 0.017  | 0.371 |
| 323 | pm11-pm19 | 1.004 | 1.004 | 0.988 | 1.027 | -0.029 | 0.227 |
| 324 | pm11-pm20 | 1.028 | 1.028 | 0.997 | 1.005 | 0.003  | 0.694 |
| 325 | pm11-pm21 | 1.51  | 1.098 | 1.843 | 1.185 | -0.017 | 0.332 |
| 326 | pm11-pm22 | 1.009 | 1.029 | 0.993 | 0.99  | 0.02   | 0.398 |
| 327 | pm11-pm23 | 1.031 | 1.051 | 0.982 | 1.036 | 0.043  | 0.186 |
| 328 | pm11-pm24 | 1.005 | 1.035 | 1.021 | 0.983 | 0.009  | 0.518 |
| 329 | pm11-pm25 | 0.977 | 0.983 | 0.993 | 0.998 | -0.006 | 0.57  |
| 330 | pm11-pm26 | 1.016 | 1.01  | 0.987 | 1.019 | 0.014  | 0.372 |
| 331 | pm11-pm27 | 1.028 | 1.04  | 1.028 | 1.009 | -0.001 | 0.852 |
| 332 | pm11-pm28 | 1.002 | 1.057 | 0.989 | 1.041 | 0.012  | 0.3   |
| 333 | pm11-pm29 | 0.995 | 1.025 | 0.994 | 0.977 | -0.004 | 0.785 |

|     |           |       |       |       |       |        |       |
|-----|-----------|-------|-------|-------|-------|--------|-------|
| 334 | pm11-pm30 | 1.044 | 1.003 | 0.986 | 1.003 | 0.003  | 0.68  |
| 335 | pm11-pm31 | 1.041 | 1.061 | 1.023 | 1.021 | 0.005  | 0.886 |
| 336 | pm11-pm32 | 0.994 | 1.031 | 0.997 | 1.05  | 0.001  | 0.816 |
| 337 | pm11-pm33 | 1.008 | 1.103 | 1.008 | 1.202 | 0.001  | 0.655 |
| 338 | pm11-pm34 | 0.988 | 1.057 | 0.904 | 1.043 | -0.007 | 0.422 |
| 339 | pm11-pm35 | 1.041 | 1.06  | 0.946 | 1.124 | 0.022  | 0.276 |
| 340 | pm11-pm36 | 0.996 | 0.983 | 0.992 | 1.016 | 0.002  | 0.799 |
| 341 | pm11-pm37 | 1.011 | 1.009 | 0.977 | 1     | 0.006  | 0.592 |
| 342 | pm12-pm13 | 0.872 | 0.934 | 0.903 | 0.831 | 0.015  | 0.33  |
| 343 | pm12-pm14 | 0.948 | 0.917 | 0.938 | 0.888 | 0.012  | 0.359 |
| 344 | pm12-pm15 | 1.08  | 1.176 | 1.14  | 1.038 | -0.067 | 0.038 |
| 345 | pm12-pm16 | 1.174 | 1.214 | 1.162 | 1.089 | -0.01  | 0.498 |
| 346 | pm12-pm17 | 1.189 | 1.14  | 1.201 | 1.065 | -0.039 | 0.266 |
| 347 | pm12-pm18 | 1.046 | 1.047 | 1.015 | 1.024 | 0.012  | 0.35  |
| 348 | pm12-pm19 | 1.012 | 1.037 | 1.006 | 1.032 | -0.028 | 0.205 |
| 349 | pm12-pm20 | 1.034 | 1.039 | 1.008 | 0.992 | -0.009 | 0.446 |
| 350 | pm12-pm21 | 1.523 | 1.167 | 1.803 | 1.234 | -0.01  | 0.41  |
| 351 | pm12-pm22 | 1.01  | 1.06  | 1.017 | 0.992 | 0.019  | 0.368 |
| 352 | pm12-pm23 | 1.004 | 1.091 | 1.016 | 1.006 | 0.032  | 0.201 |
| 353 | pm12-pm24 | 0.995 | 1.035 | 0.999 | 1.018 | -0.005 | 0.523 |
| 354 | pm12-pm25 | 0.996 | 1.005 | 1.013 | 1.017 | -0.001 | 0.727 |
| 355 | pm12-pm26 | 1.023 | 1.003 | 0.998 | 1.028 | 0.004  | 0.659 |
| 356 | pm12-pm27 | 1.033 | 1.11  | 1.05  | 1.014 | 0.009  | 0.561 |
| 357 | pm12-pm28 | 1.025 | 1.03  | 0.99  | 1.021 | -0.009 | 0.593 |
| 358 | pm12-pm29 | 1.017 | 1.07  | 0.998 | 1.019 | 0.009  | 0.468 |
| 359 | pm12-pm30 | 1.083 | 1.029 | 1.02  | 1.068 | 0.029  | 0.223 |
| 360 | pm12-pm31 | 1.018 | 1.131 | 1.037 | 1.024 | 0.006  | 0.495 |
| 361 | pm12-pm32 | 1.024 | 1.05  | 0.996 | 1.08  | 0.006  | 0.439 |
| 362 | pm12-pm33 | 0.99  | 1.149 | 1.025 | 1.145 | -0.017 | 0.335 |
| 363 | pm12-pm34 | 0.975 | 1.063 | 0.911 | 1.04  | -0.024 | 0.202 |

|     |           |       |       |       |       |        |       |
|-----|-----------|-------|-------|-------|-------|--------|-------|
| 364 | pm12-pm35 | 1.038 | 1.053 | 0.94  | 1.134 | 0.005  | 0.407 |
| 365 | pm12-pm36 | 0.999 | 1.053 | 1.005 | 1.004 | 0.006  | 0.554 |
| 366 | pm12-pm37 | 1.012 | 1.012 | 1.009 | 1.024 | 0.005  | 0.558 |
| 367 | pm13-pm14 | 0.858 | 0.786 | 0.841 | 0.856 | 0.078  | 0.065 |
| 368 | pm13-pm15 | 0.991 | 1.043 | 0.982 | 0.852 | -0.055 | 0.032 |
| 369 | pm13-pm16 | 1.058 | 0.944 | 1.04  | 0.902 | -0.03  | 0.299 |
| 370 | pm13-pm17 | 0.955 | 0.994 | 1.068 | 0.892 | -0.057 | 0.021 |
| 371 | pm13-pm18 | 0.906 | 0.937 | 0.897 | 0.838 | 0.027  | 0.255 |
| 372 | pm13-pm19 | 0.905 | 0.908 | 0.973 | 0.865 | 0.016  | 0.391 |
| 373 | pm13-pm20 | 0.907 | 0.889 | 0.881 | 0.847 | 0.007  | 0.429 |
| 374 | pm13-pm21 | 1.436 | 0.959 | 1.661 | 1.043 | -0.013 | 0.351 |
| 375 | pm13-pm22 | 0.908 | 0.854 | 0.894 | 0.831 | 0.024  | 0.25  |
| 376 | pm13-pm23 | 0.89  | 0.828 | 0.891 | 0.845 | 0.02   | 0.348 |
| 377 | pm13-pm24 | 0.877 | 0.896 | 0.903 | 0.844 | 0.016  | 0.356 |
| 378 | pm13-pm25 | 0.857 | 0.832 | 0.93  | 0.834 | 0.007  | 0.511 |
| 379 | pm13-pm26 | 0.887 | 0.881 | 0.9   | 0.831 | 0.019  | 0.362 |
| 380 | pm13-pm27 | 0.881 | 0.888 | 0.904 | 0.835 | -0.013 | 0.317 |
| 381 | pm13-pm28 | 0.919 | 0.874 | 0.89  | 0.873 | 0.017  | 0.3   |
| 382 | pm13-pm29 | 0.856 | 0.92  | 0.927 | 0.872 | 0.03   | 0.276 |
| 383 | pm13-pm30 | 0.878 | 0.855 | 0.894 | 0.875 | 0.007  | 0.431 |
| 384 | pm13-pm31 | 0.933 | 0.947 | 0.945 | 0.848 | 0.024  | 0.252 |
| 385 | pm13-pm32 | 0.92  | 0.867 | 0.873 | 0.919 | 0.016  | 0.304 |
| 386 | pm13-pm33 | 0.906 | 0.905 | 0.877 | 0.948 | -0.032 | 0.216 |
| 387 | pm13-pm34 | 0.88  | 0.909 | 0.824 | 0.889 | 0.008  | 0.509 |
| 388 | pm13-pm35 | 0.887 | 0.891 | 0.837 | 0.969 | 0.013  | 0.392 |
| 389 | pm13-pm36 | 0.874 | 0.847 | 0.88  | 0.843 | 0.004  | 0.883 |
| 390 | pm13-pm37 | 0.905 | 0.839 | 0.876 | 0.831 | 0.007  | 0.437 |
| 391 | pm14-pm15 | 1.026 | 1.08  | 1.031 | 0.907 | -0.052 | 0.038 |
| 392 | pm14-pm16 | 1.044 | 1.006 | 1.065 | 0.921 | -0.048 | 0.168 |
| 393 | pm14-pm17 | 1.042 | 0.974 | 1.112 | 0.92  | -0.063 | 0.037 |

|     |           |       |       |       |       |        |       |
|-----|-----------|-------|-------|-------|-------|--------|-------|
| 394 | pm14-pm18 | 0.913 | 0.896 | 0.912 | 0.869 | -0.01  | 0.358 |
| 395 | pm14-pm19 | 0.918 | 0.95  | 0.955 | 0.906 | -0.005 | 0.588 |
| 396 | pm14-pm20 | 0.909 | 0.941 | 0.93  | 0.905 | 0.007  | 0.511 |
| 397 | pm14-pm21 | 1.416 | 0.983 | 1.718 | 1.104 | -0.023 | 0.258 |
| 398 | pm14-pm22 | 0.892 | 0.942 | 0.929 | 0.876 | 0.022  | 0.247 |
| 399 | pm14-pm23 | 0.879 | 0.938 | 0.899 | 0.884 | 0.016  | 0.372 |
| 400 | pm14-pm24 | 0.93  | 0.898 | 0.911 | 0.872 | -0.001 | 0.994 |
| 401 | pm14-pm25 | 0.924 | 0.862 | 0.93  | 0.869 | 0      | 0.777 |
| 402 | pm14-pm26 | 0.931 | 0.926 | 0.9   | 0.886 | 0.015  | 0.391 |
| 403 | pm14-pm27 | 0.939 | 0.982 | 0.958 | 0.919 | 0.019  | 0.356 |
| 404 | pm14-pm28 | 0.942 | 0.826 | 0.933 | 0.888 | -0.015 | 0.312 |
| 405 | pm14-pm29 | 0.911 | 0.88  | 0.89  | 0.878 | -0.014 | 0.349 |
| 406 | pm14-pm30 | 0.939 | 0.883 | 0.894 | 0.866 | -0.013 | 0.397 |
| 407 | pm14-pm31 | 0.915 | 0.957 | 0.999 | 0.921 | 0.014  | 0.392 |
| 408 | pm14-pm32 | 0.887 | 0.937 | 0.945 | 0.957 | 0.012  | 0.37  |
| 409 | pm14-pm33 | 0.902 | 0.989 | 0.922 | 0.954 | -0.039 | 0.288 |
| 410 | pm14-pm34 | 0.928 | 0.892 | 0.873 | 0.912 | -0.007 | 0.595 |
| 411 | pm14-pm35 | 0.927 | 0.867 | 0.919 | 0.964 | -0.004 | 0.8   |
| 412 | pm14-pm36 | 0.934 | 0.852 | 0.91  | 0.894 | 0      | 0.867 |
| 413 | pm14-pm37 | 0.928 | 0.892 | 0.944 | 0.858 | 0.01   | 0.464 |
| 414 | pm15-pm16 | 1.272 | 1.398 | 1.223 | 1.121 | -0.068 | 0.043 |
| 415 | pm15-pm17 | 1.233 | 1.425 | 1.296 | 1.092 | -0.078 | 0.014 |
| 416 | pm15-pm18 | 1.136 | 1.165 | 1.104 | 1.018 | -0.067 | 0.037 |
| 417 | pm15-pm19 | 1.113 | 1.256 | 1.168 | 1.078 | -0.048 | 0.195 |
| 418 | pm15-pm20 | 1.129 | 1.229 | 1.126 | 1.04  | -0.048 | 0.151 |
| 419 | pm15-pm21 | 1.697 | 1.319 | 2.116 | 1.269 | 0.007  | 0.426 |
| 420 | pm15-pm22 | 1.113 | 1.226 | 1.125 | 1.037 | -0.027 | 0.219 |
| 421 | pm15-pm23 | 1.066 | 1.273 | 1.13  | 1.008 | -0.029 | 0.259 |
| 422 | pm15-pm24 | 1.099 | 1.239 | 1.128 | 1.011 | -0.05  | 0.185 |
| 423 | pm15-pm25 | 1.136 | 1.217 | 1.127 | 1.026 | -0.034 | 0.274 |

|     |           |       |       |       |       |        |       |
|-----|-----------|-------|-------|-------|-------|--------|-------|
| 424 | pm15-pm26 | 1.133 | 1.196 | 1.124 | 1.07  | -0.03  | 0.232 |
| 425 | pm15-pm27 | 1.145 | 1.283 | 1.137 | 1.017 | -0.049 | 0.17  |
| 426 | pm15-pm28 | 1.092 | 1.223 | 1.125 | 1.073 | -0.049 | 0.19  |
| 427 | pm15-pm29 | 1.093 | 1.158 | 1.08  | 1.034 | -0.077 | 0.017 |
| 428 | pm15-pm30 | 1.138 | 1.235 | 1.125 | 1.096 | -0.024 | 0.248 |
| 429 | pm15-pm31 | 1.103 | 1.28  | 1.155 | 1.051 | -0.051 | 0.028 |
| 430 | pm15-pm32 | 1.078 | 1.252 | 1.093 | 1.104 | -0.052 | 0.025 |
| 431 | pm15-pm33 | 1.114 | 1.362 | 1.135 | 1.158 | -0.053 | 0.021 |
| 432 | pm15-pm34 | 1.137 | 1.232 | 1.047 | 1.066 | -0.052 | 0.023 |
| 433 | pm15-pm35 | 1.102 | 1.216 | 1.051 | 1.187 | -0.049 | 0.156 |
| 434 | pm15-pm36 | 1.11  | 1.227 | 1.113 | 0.989 | -0.051 | 0.029 |
| 435 | pm15-pm37 | 1.115 | 1.193 | 1.138 | 1.034 | -0.041 | 0.179 |
| 436 | pm16-pm17 | 1.5   | 1.527 | 1.555 | 1.373 | 0.155  | 0.002 |
| 437 | pm16-pm18 | 1.182 | 1.215 | 1.152 | 1.047 | -0.018 | 0.38  |
| 438 | pm16-pm19 | 1.148 | 1.27  | 1.183 | 1.094 | -0.022 | 0.279 |
| 439 | pm16-pm20 | 1.166 | 1.189 | 1.122 | 1.077 | -0.034 | 0.22  |
| 440 | pm16-pm21 | 1.762 | 1.277 | 2.15  | 1.257 | 0.024  | 0.272 |
| 441 | pm16-pm22 | 1.172 | 1.227 | 1.164 | 1.017 | -0.001 | 0.736 |
| 442 | pm16-pm23 | 1.145 | 1.207 | 1.15  | 1.071 | 0      | 0.904 |
| 443 | pm16-pm24 | 1.116 | 1.248 | 1.162 | 1.072 | -0.013 | 0.373 |
| 444 | pm16-pm25 | 1.163 | 1.146 | 1.162 | 1.056 | -0.023 | 0.216 |
| 445 | pm16-pm26 | 1.156 | 1.148 | 1.133 | 1.057 | -0.031 | 0.265 |
| 446 | pm16-pm27 | 1.142 | 1.195 | 1.186 | 1.038 | -0.048 | 0.167 |
| 447 | pm16-pm28 | 1.169 | 1.216 | 1.15  | 1.112 | -0.009 | 0.454 |
| 448 | pm16-pm29 | 1.163 | 1.163 | 1.174 | 1.086 | -0.016 | 0.353 |
| 449 | pm16-pm30 | 1.139 | 1.141 | 1.126 | 1.059 | -0.051 | 0.042 |
| 450 | pm16-pm31 | 1.215 | 1.278 | 1.191 | 1.07  | -0.004 | 0.916 |
| 451 | pm16-pm32 | 1.127 | 1.163 | 1.153 | 1.168 | -0.025 | 0.259 |
| 452 | pm16-pm33 | 1.209 | 1.299 | 1.19  | 1.213 | -0.012 | 0.399 |
| 453 | pm16-pm34 | 1.157 | 1.229 | 1.127 | 1.127 | -0.007 | 0.559 |



|     |           |       |       |       |       |        |       |
|-----|-----------|-------|-------|-------|-------|--------|-------|
| 454 | pm16-pm35 | 1.159 | 1.253 | 1.119 | 1.218 | 0.005  | 0.516 |
| 455 | pm16-pm36 | 1.138 | 1.16  | 1.149 | 1.062 | -0.028 | 0.207 |
| 456 | pm16-pm37 | 1.143 | 1.151 | 1.141 | 1.041 | -0.035 | 0.215 |
| 457 | pm17-pm18 | 1.178 | 1.175 | 1.182 | 1.06  | -0.036 | 0.248 |
| 458 | pm17-pm19 | 1.154 | 1.235 | 1.223 | 1.097 | -0.037 | 0.234 |
| 459 | pm17-pm20 | 1.157 | 1.172 | 1.205 | 1.075 | -0.039 | 0.237 |
| 460 | pm17-pm21 | 1.816 | 1.32  | 2.212 | 1.17  | 0.024  | 0.254 |
| 461 | pm17-pm22 | 1.162 | 1.216 | 1.208 | 1.005 | -0.017 | 0.391 |
| 462 | pm17-pm23 | 1.151 | 1.248 | 1.198 | 0.995 | -0.013 | 0.324 |
| 463 | pm17-pm24 | 1.168 | 1.16  | 1.178 | 1.015 | -0.051 | 0.031 |
| 464 | pm17-pm25 | 1.159 | 1.147 | 1.177 | 1.038 | -0.043 | 0.189 |
| 465 | pm17-pm26 | 1.128 | 1.212 | 1.19  | 1.019 | -0.036 | 0.237 |
| 466 | pm17-pm27 | 1.141 | 1.19  | 1.253 | 1.069 | -0.044 | 0.178 |
| 467 | pm17-pm28 | 1.161 | 1.201 | 1.187 | 1.044 | -0.041 | 0.182 |
| 468 | pm17-pm29 | 1.158 | 1.189 | 1.239 | 1.034 | -0.026 | 0.298 |
| 469 | pm17-pm30 | 1.163 | 1.151 | 1.211 | 1.032 | -0.046 | 0.157 |
| 470 | pm17-pm31 | 1.154 | 1.255 | 1.217 | 1.064 | -0.039 | 0.262 |
| 471 | pm17-pm32 | 1.117 | 1.15  | 1.202 | 1.114 | -0.05  | 0.024 |
| 472 | pm17-pm33 | 1.175 | 1.29  | 1.193 | 1.204 | -0.043 | 0.162 |
| 473 | pm17-pm34 | 1.155 | 1.186 | 1.146 | 1.101 | -0.038 | 0.23  |
| 474 | pm17-pm35 | 1.168 | 1.206 | 1.138 | 1.165 | -0.031 | 0.22  |
| 475 | pm17-pm36 | 1.129 | 1.15  | 1.23  | 1.021 | -0.041 | 0.178 |
| 476 | pm17-pm37 | 1.175 | 1.131 | 1.227 | 1.06  | -0.025 | 0.291 |
| 477 | pm18-pm19 | 1.005 | 1.019 | 1.051 | 1.055 | -0.015 | 0.346 |
| 478 | pm18-pm20 | 1.044 | 1.009 | 1.024 | 1.027 | 0.002  | 0.692 |
| 479 | pm18-pm21 | 1.517 | 1.117 | 1.844 | 1.273 | -0.001 | 0.823 |
| 480 | pm18-pm22 | 1.037 | 1.033 | 0.986 | 1.027 | 0.023  | 0.269 |
| 481 | pm18-pm23 | 1.006 | 1.079 | 1.005 | 1.01  | 0.031  | 0.29  |
| 482 | pm18-pm24 | 1.041 | 1.062 | 0.983 | 1.002 | 0.008  | 0.531 |
| 483 | pm18-pm25 | 1.015 | 1.009 | 1.02  | 1.03  | 0.012  | 0.313 |

|     |           |       |       |       |       |        |       |
|-----|-----------|-------|-------|-------|-------|--------|-------|
| 484 | pm18-pm26 | 1.017 | 0.986 | 0.986 | 1.054 | 0.004  | 0.836 |
| 485 | pm18-pm27 | 1.024 | 1.067 | 1.012 | 1.009 | -0.012 | 0.352 |
| 486 | pm18-pm28 | 1.03  | 1.065 | 0.996 | 1.018 | 0.005  | 0.822 |
| 487 | pm18-pm29 | 1.024 | 1.065 | 1.017 | 1.01  | 0.015  | 0.372 |
| 488 | pm18-pm30 | 1.051 | 1.017 | 1.038 | 1.016 | 0.012  | 0.313 |
| 489 | pm18-pm31 | 1.042 | 1.093 | 0.995 | 1.044 | 0      | 0.963 |
| 490 | pm18-pm32 | 1.027 | 1.081 | 0.999 | 1.091 | 0.021  | 0.265 |
| 491 | pm18-pm33 | 1.03  | 1.137 | 0.996 | 1.185 | -0.004 | 0.782 |
| 492 | pm18-pm34 | 1.018 | 1.035 | 0.896 | 1.127 | 0.001  | 0.671 |
| 493 | pm18-pm35 | 1.061 | 1.05  | 0.941 | 1.16  | 0.02   | 0.342 |
| 494 | pm18-pm36 | 1.01  | 1.036 | 0.987 | 1.043 | 0.012  | 0.388 |
| 495 | pm18-pm37 | 1.026 | 1.012 | 1.009 | 1.022 | 0.011  | 0.375 |
| 496 | pm19-pm20 | 0.988 | 1.109 | 1.01  | 1.037 | -0.017 | 0.358 |
| 497 | pm19-pm21 | 1.516 | 1.146 | 1.874 | 1.242 | -0.023 | 0.244 |
| 498 | pm19-pm22 | 1.028 | 1.024 | 1.019 | 1.04  | 0      | 0.635 |
| 499 | pm19-pm23 | 0.995 | 1.085 | 0.995 | 1.064 | 0.011  | 0.381 |
| 500 | pm19-pm24 | 1.001 | 1.047 | 1.049 | 1.024 | -0.013 | 0.374 |
| 501 | pm19-pm25 | 1.014 | 1.069 | 1.036 | 1.043 | 0.005  | 0.754 |
| 502 | pm19-pm26 | 0.989 | 1.065 | 1.048 | 1.061 | 0.005  | 0.57  |
| 503 | pm19-pm27 | 1.016 | 1.111 | 1.071 | 1.075 | -0.001 | 0.645 |
| 504 | pm19-pm28 | 0.999 | 1.055 | 1.035 | 1.086 | -0.008 | 0.419 |
| 505 | pm19-pm29 | 1.017 | 1.095 | 1.01  | 1.074 | 0.006  | 0.474 |
| 506 | pm19-pm30 | 0.983 | 1.055 | 1.031 | 1.054 | -0.017 | 0.368 |
| 507 | pm19-pm31 | 1.014 | 1.112 | 1.047 | 1.027 | -0.023 | 0.254 |
| 508 | pm19-pm32 | 1.028 | 1.041 | 1.037 | 1.099 | -0.007 | 0.428 |
| 509 | pm19-pm33 | 1.007 | 1.188 | 1.013 | 1.164 | -0.027 | 0.228 |
| 510 | pm19-pm34 | 0.986 | 1.081 | 0.934 | 1.102 | -0.022 | 0.248 |
| 511 | pm19-pm35 | 1.032 | 1.145 | 0.972 | 1.123 | 0.005  | 0.488 |
| 512 | pm19-pm36 | 0.99  | 1.018 | 1.025 | 1.034 | -0.02  | 0.37  |
| 513 | pm19-pm37 | 1.008 | 1.101 | 1.029 | 1.032 | 0.007  | 0.476 |

|     |           |       |       |       |       |        |       |
|-----|-----------|-------|-------|-------|-------|--------|-------|
| 514 | pm20-pm21 | 1.563 | 1.155 | 1.819 | 1.217 | -0.006 | 0.487 |
| 515 | pm20-pm22 | 1.006 | 1.089 | 0.988 | 0.998 | 0.016  | 0.355 |
| 516 | pm20-pm23 | 1.012 | 1.087 | 1.004 | 1.037 | 0.034  | 0.248 |
| 517 | pm20-pm24 | 0.998 | 1.044 | 0.998 | 1.006 | -0.009 | 0.527 |
| 518 | pm20-pm25 | 1.012 | 1.059 | 1.001 | 1.035 | 0.014  | 0.399 |
| 519 | pm20-pm26 | 1.008 | 1.06  | 0.98  | 1.009 | 0.002  | 0.958 |
| 520 | pm20-pm27 | 1.021 | 1.017 | 1.03  | 1.033 | -0.021 | 0.212 |
| 521 | pm20-pm28 | 1.022 | 1.064 | 1.002 | 1.052 | 0.006  | 0.437 |
| 522 | pm20-pm29 | 1.003 | 1.049 | 0.973 | 1.019 | -0.009 | 0.473 |
| 523 | pm20-pm30 | 1.047 | 1.032 | 0.993 | 1.041 | 0.003  | 0.813 |
| 524 | pm20-pm31 | 1.031 | 1.124 | 1.058 | 1.039 | 0.013  | 0.321 |
| 525 | pm20-pm32 | 1.023 | 1.032 | 1.007 | 1.104 | 0.006  | 0.433 |
| 526 | pm20-pm33 | 1.061 | 1.086 | 1.001 | 1.156 | -0.021 | 0.264 |
| 527 | pm20-pm34 | 1.019 | 1.034 | 0.911 | 1.064 | -0.017 | 0.384 |
| 528 | pm20-pm35 | 1.006 | 1.062 | 0.962 | 1.141 | 0.003  | 0.691 |
| 529 | pm20-pm36 | 1.005 | 0.997 | 1.007 | 1.026 | -0.004 | 0.981 |
| 530 | pm20-pm37 | 0.992 | 1.04  | 1.012 | 0.998 | -0.002 | 0.943 |
| 531 | pm21-pm22 | 1.521 | 1.149 | 1.824 | 1.162 | -0.005 | 0.831 |
| 532 | pm21-pm23 | 1.532 | 1.151 | 1.841 | 1.191 | 0.014  | 0.331 |
| 533 | pm21-pm24 | 1.574 | 1.131 | 1.816 | 1.203 | -0.004 | 0.864 |
| 534 | pm21-pm25 | 1.535 | 1.086 | 1.804 | 1.218 | -0.016 | 0.378 |
| 535 | pm21-pm26 | 1.515 | 1.124 | 1.814 | 1.206 | -0.012 | 0.327 |
| 536 | pm21-pm27 | 1.529 | 1.202 | 1.823 | 1.235 | -0.013 | 0.307 |
| 537 | pm21-pm28 | 1.566 | 1.126 | 1.864 | 1.243 | 0.007  | 0.417 |
| 538 | pm21-pm29 | 1.545 | 1.095 | 1.793 | 1.186 | -0.029 | 0.235 |
| 539 | pm21-pm30 | 1.502 | 1.07  | 1.832 | 1.2   | -0.038 | 0.214 |
| 540 | pm21-pm31 | 1.537 | 1.159 | 1.844 | 1.24  | -0.02  | 0.327 |
| 541 | pm21-pm32 | 1.519 | 1.165 | 1.785 | 1.249 | -0.02  | 0.303 |
| 542 | pm21-pm33 | 1.55  | 1.21  | 1.883 | 1.39  | -0.003 | 0.951 |
| 543 | pm21-pm34 | 1.549 | 1.131 | 1.762 | 1.23  | -0.021 | 0.266 |

|     |           |       |       |       |       |        |       |
|-----|-----------|-------|-------|-------|-------|--------|-------|
| 544 | pm21-pm35 | 1.524 | 1.173 | 1.778 | 1.365 | 0.007  | 0.433 |
| 545 | pm21-pm36 | 1.502 | 1.086 | 1.823 | 1.213 | -0.022 | 0.266 |
| 546 | pm21-pm37 | 1.524 | 1.124 | 1.867 | 1.182 | -0.002 | 0.641 |
| 547 | pm22-pm23 | 1     | 1.061 | 0.988 | 0.985 | 0.034  | 0.211 |
| 548 | pm22-pm24 | 0.981 | 1.095 | 1.007 | 0.986 | 0.023  | 0.236 |
| 549 | pm22-pm25 | 0.998 | 1.033 | 1.026 | 0.991 | 0.026  | 0.258 |
| 550 | pm22-pm26 | 1.031 | 1.033 | 1.001 | 0.986 | 0.027  | 0.23  |
| 551 | pm22-pm27 | 1.009 | 1.092 | 1.007 | 1.03  | 0.014  | 0.328 |
| 552 | pm22-pm28 | 1.015 | 1.065 | 1.005 | 1.033 | 0.027  | 0.281 |
| 553 | pm22-pm29 | 1.002 | 1.08  | 0.977 | 1.017 | 0.025  | 0.288 |
| 554 | pm22-pm30 | 0.99  | 1.088 | 0.967 | 1.007 | 0.015  | 0.367 |
| 555 | pm22-pm31 | 1.062 | 1.124 | 1.01  | 0.987 | 0.022  | 0.257 |
| 556 | pm22-pm32 | 1.008 | 1.081 | 0.988 | 1.039 | 0.02   | 0.245 |
| 557 | pm22-pm33 | 1.003 | 1.145 | 0.989 | 1.172 | 0.007  | 0.511 |
| 558 | pm22-pm34 | 0.984 | 1.061 | 0.952 | 1.057 | 0.016  | 0.338 |
| 559 | pm22-pm35 | 1.019 | 1.075 | 0.982 | 1.113 | 0.034  | 0.224 |
| 560 | pm22-pm36 | 1.003 | 1.029 | 0.98  | 0.973 | 0.009  | 0.464 |
| 561 | pm22-pm37 | 0.98  | 1.049 | 1.001 | 1.001 | 0.022  | 0.241 |
| 562 | pm23-pm24 | 1.028 | 1.152 | 0.987 | 0.923 | 0.032  | 0.281 |
| 563 | pm23-pm25 | 0.989 | 1.044 | 0.996 | 1.012 | 0.028  | 0.206 |
| 564 | pm23-pm26 | 1.009 | 1.031 | 1.016 | 1.003 | 0.032  | 0.291 |
| 565 | pm23-pm27 | 1.012 | 1.159 | 1.036 | 0.97  | 0.028  | 0.247 |
| 566 | pm23-pm28 | 1.019 | 1.069 | 0.997 | 1.031 | 0.03   | 0.203 |
| 567 | pm23-pm29 | 1.014 | 1.049 | 0.98  | 0.991 | 0.018  | 0.312 |
| 568 | pm23-pm30 | 0.996 | 1.068 | 0.976 | 0.983 | 0.011  | 0.378 |
| 569 | pm23-pm31 | 1.043 | 1.168 | 1.035 | 1.003 | 0.042  | 0.153 |
| 570 | pm23-pm32 | 0.987 | 1.075 | 0.997 | 1.093 | 0.033  | 0.239 |
| 571 | pm23-pm33 | 1.01  | 1.186 | 1.002 | 1.134 | 0.015  | 0.332 |
| 572 | pm23-pm34 | 0.947 | 1.094 | 0.939 | 1.023 | 0.006  | 0.556 |
| 573 | pm23-pm35 | 1.008 | 1.087 | 0.933 | 1.119 | 0.027  | 0.269 |

|     |           |       |       |       |       |        |       |
|-----|-----------|-------|-------|-------|-------|--------|-------|
| 574 | pm23-pm36 | 1.006 | 1.067 | 1.004 | 1.014 | 0.039  | 0.283 |
| 575 | pm23-pm37 | 0.981 | 1.083 | 1.023 | 0.979 | 0.034  | 0.233 |
| 576 | pm24-pm25 | 1.008 | 1.057 | 1     | 0.994 | 0.012  | 0.334 |
| 577 | pm24-pm26 | 1.004 | 1.042 | 1.012 | 1.002 | 0.013  | 0.356 |
| 578 | pm24-pm27 | 0.984 | 1.077 | 1.047 | 0.98  | -0.014 | 0.364 |
| 579 | pm24-pm28 | 0.987 | 1.017 | 0.991 | 1.029 | -0.013 | 0.368 |
| 580 | pm24-pm29 | 0.985 | 1.074 | 0.993 | 0.974 | -0.004 | 0.841 |
| 581 | pm24-pm30 | 1.029 | 1.064 | 0.98  | 1.007 | 0.005  | 0.49  |
| 582 | pm24-pm31 | 1.019 | 1.121 | 1.005 | 1.022 | 0.001  | 0.726 |
| 583 | pm24-pm32 | 0.994 | 1.07  | 0.999 | 1.073 | 0.009  | 0.484 |
| 584 | pm24-pm33 | 0.996 | 1.151 | 0.994 | 1.154 | -0.013 | 0.303 |
| 585 | pm24-pm34 | 1.016 | 1.045 | 0.945 | 1.056 | 0.001  | 0.999 |
| 586 | pm24-pm35 | 1.021 | 1.114 | 0.904 | 1.118 | 0.01   | 0.556 |
| 587 | pm24-pm36 | 0.976 | 1.027 | 1.014 | 1.014 | 0.005  | 0.833 |
| 588 | pm24-pm37 | 1.019 | 1.014 | 1.003 | 1.01  | 0.01   | 0.526 |
| 589 | pm25-pm26 | 0.984 | 1     | 0.996 | 1.01  | 0.003  | 0.89  |
| 590 | pm25-pm27 | 0.987 | 1.039 | 1.015 | 1.003 | -0.017 | 0.313 |
| 591 | pm25-pm28 | 1.002 | 1.046 | 0.995 | 1.033 | 0.008  | 0.4   |
| 592 | pm25-pm29 | 1.02  | 1.058 | 1.002 | 0.982 | 0.013  | 0.326 |
| 593 | pm25-pm30 | 1.035 | 1.038 | 1.011 | 1.023 | 0.02   | 0.207 |
| 594 | pm25-pm31 | 1.027 | 1.119 | 0.996 | 0.991 | 0.001  | 0.879 |
| 595 | pm25-pm32 | 0.985 | 1.018 | 1.007 | 1.053 | -0.001 | 0.683 |
| 596 | pm25-pm33 | 1     | 1.115 | 0.991 | 1.118 | -0.023 | 0.207 |
| 597 | pm25-pm34 | 1.003 | 1.02  | 0.931 | 1.066 | -0.001 | 0.733 |
| 598 | pm25-pm35 | 1.034 | 1.077 | 0.96  | 1.135 | 0.03   | 0.26  |
| 599 | pm25-pm36 | 0.997 | 1.002 | 1.015 | 0.987 | 0.005  | 0.502 |
| 600 | pm25-pm37 | 0.996 | 1.006 | 1.006 | 1.021 | 0.013  | 0.392 |
| 601 | pm26-pm27 | 1.022 | 1.045 | 1.041 | 1.013 | 0.002  | 0.698 |
| 602 | pm26-pm28 | 0.992 | 0.988 | 0.991 | 1.041 | -0.008 | 0.462 |
| 603 | pm26-pm29 | 1     | 1.053 | 0.98  | 0.981 | 0.001  | 0.924 |

|     |           |       |       |       |       |        |       |
|-----|-----------|-------|-------|-------|-------|--------|-------|
| 604 | pm26-pm30 | 1.042 | 0.996 | 0.988 | 1.018 | 0.004  | 0.986 |
| 605 | pm26-pm31 | 1.045 | 1.094 | 1.046 | 1.018 | 0.019  | 0.38  |
| 606 | pm26-pm32 | 1.003 | 1.01  | 0.969 | 1.058 | -0.007 | 0.402 |
| 607 | pm26-pm33 | 1.021 | 1.139 | 0.967 | 1.155 | -0.009 | 0.485 |
| 608 | pm26-pm34 | 0.991 | 1.037 | 0.919 | 1.048 | -0.008 | 0.498 |
| 609 | pm26-pm35 | 1.029 | 1.017 | 0.939 | 1.137 | 0.009  | 0.516 |
| 610 | pm26-pm36 | 0.986 | 1.016 | 1.014 | 0.991 | 0.006  | 0.476 |
| 611 | pm26-pm37 | 0.991 | 0.996 | 1.006 | 0.992 | 0.002  | 0.804 |
| 612 | pm27-pm28 | 0.999 | 1.098 | 1.046 | 1.025 | -0.003 | 0.926 |
| 613 | pm27-pm29 | 0.996 | 1.104 | 1.008 | 1.019 | -0.005 | 0.769 |
| 614 | pm27-pm30 | 1.013 | 1.062 | 1.016 | 1.021 | -0.013 | 0.311 |
| 615 | pm27-pm31 | 1.062 | 1.171 | 1.057 | 1.025 | 0.012  | 0.37  |
| 616 | pm27-pm32 | 1.008 | 1.143 | 1.014 | 1.071 | 0.008  | 0.58  |
| 617 | pm27-pm33 | 1.019 | 1.169 | 1.042 | 1.189 | -0.009 | 0.421 |
| 618 | pm27-pm34 | 1.015 | 1.11  | 0.977 | 1.057 | -0.001 | 0.644 |
| 619 | pm27-pm35 | 1.033 | 1.091 | 0.965 | 1.131 | -0.001 | 0.997 |
| 620 | pm27-pm36 | 1.022 | 1.023 | 1.036 | 1     | -0.009 | 0.533 |
| 621 | pm27-pm37 | 0.997 | 1.05  | 1.026 | 1     | -0.01  | 0.51  |
| 622 | pm28-pm29 | 1.015 | 1.039 | 1.014 | 1.028 | 0.005  | 0.57  |
| 623 | pm28-pm30 | 1.053 | 1.048 | 1.006 | 1.058 | 0.018  | 0.398 |
| 624 | pm28-pm31 | 1.039 | 1.114 | 1.031 | 1.029 | 0.005  | 0.756 |
| 625 | pm28-pm32 | 1.015 | 1.083 | 1.003 | 1.099 | 0.016  | 0.385 |
| 626 | pm28-pm33 | 1.033 | 1.191 | 0.99  | 1.183 | 0.004  | 0.806 |
| 627 | pm28-pm34 | 1     | 1.061 | 0.935 | 1.057 | -0.009 | 0.465 |
| 628 | pm28-pm35 | 1.006 | 1.076 | 0.952 | 1.136 | 0.005  | 0.82  |
| 629 | pm28-pm36 | 1.01  | 1.018 | 1.026 | 1.009 | 0.004  | 0.971 |
| 630 | pm28-pm37 | 1.012 | 1.019 | 0.987 | 1.045 | 0.006  | 0.541 |
| 631 | pm29-pm30 | 1.022 | 1.047 | 0.991 | 1.012 | 0.003  | 0.618 |
| 632 | pm29-pm31 | 1.024 | 1.173 | 1.058 | 1.014 | 0.027  | 0.258 |
| 633 | pm29-pm32 | 0.994 | 1.046 | 0.997 | 1.084 | 0.005  | 0.58  |

|     |           |       |       |       |       |        |       |
|-----|-----------|-------|-------|-------|-------|--------|-------|
| 634 | pm29-pm33 | 1.018 | 1.136 | 1.012 | 1.167 | -0.004 | 0.867 |
| 635 | pm29-pm34 | 0.967 | 1.097 | 0.904 | 1.097 | 0.002  | 0.657 |
| 636 | pm29-pm35 | 1.04  | 1.039 | 0.946 | 1.142 | 0.012  | 0.311 |
| 637 | pm29-pm36 | 0.991 | 1.021 | 1.009 | 0.979 | -0.003 | 0.85  |
| 638 | pm29-pm37 | 1.01  | 1.061 | 0.971 | 1.013 | 0.012  | 0.335 |
| 639 | pm30-pm31 | 1.043 | 1.113 | 1.048 | 1.019 | 0.011  | 0.39  |
| 640 | pm30-pm32 | 1.016 | 1.062 | 0.992 | 1.066 | 0.004  | 0.932 |
| 641 | pm30-pm33 | 1.056 | 1.138 | 1.01  | 1.178 | 0.004  | 0.958 |
| 642 | pm30-pm34 | 1.008 | 1.047 | 0.914 | 1.043 | -0.016 | 0.352 |
| 643 | pm30-pm35 | 1.045 | 1.062 | 0.96  | 1.167 | 0.025  | 0.21  |
| 644 | pm30-pm36 | 1.04  | 1.018 | 1.021 | 1.004 | 0.013  | 0.324 |
| 645 | pm30-pm37 | 1.021 | 1.018 | 1.009 | 1.052 | 0.019  | 0.396 |
| 646 | pm31-pm32 | 1.031 | 1.183 | 1.007 | 1.059 | 0.015  | 0.356 |
| 647 | pm31-pm33 | 1.041 | 1.165 | 1.019 | 1.195 | -0.012 | 0.385 |
| 648 | pm31-pm34 | 1.034 | 1.15  | 0.966 | 1.068 | 0.01   | 0.349 |
| 649 | pm31-pm35 | 1.036 | 1.135 | 0.953 | 1.134 | 0.005  | 0.501 |
| 650 | pm31-pm36 | 1.023 | 1.081 | 1.01  | 0.994 | -0.006 | 0.453 |
| 651 | pm31-pm37 | 1.056 | 1.106 | 1.048 | 1.019 | 0.026  | 0.232 |
| 652 | pm32-pm33 | 1.035 | 1.143 | 1.013 | 1.238 | 0.005  | 0.574 |
| 653 | pm32-pm34 | 1.01  | 1.06  | 0.932 | 1.136 | 0.006  | 0.483 |
| 654 | pm32-pm35 | 1.036 | 1.126 | 0.947 | 1.207 | 0.035  | 0.207 |
| 655 | pm32-pm36 | 1.008 | 1.055 | 0.982 | 1.063 | 0.009  | 0.472 |
| 656 | pm32-pm37 | 1.001 | 1.055 | 0.98  | 1.077 | 0.011  | 0.388 |
| 657 | pm33-pm34 | 1.037 | 1.114 | 0.978 | 1.24  | 0.001  | 0.681 |
| 658 | pm33-pm35 | 1.047 | 1.176 | 0.891 | 1.285 | -0.006 | 0.582 |
| 659 | pm33-pm36 | 0.993 | 1.101 | 0.994 | 1.175 | -0.014 | 0.368 |
| 660 | pm33-pm37 | 1.004 | 1.164 | 1.007 | 1.152 | 0.003  | 0.678 |
| 661 | pm34-pm35 | 1.034 | 1.058 | 0.957 | 1.141 | 0.014  | 0.349 |
| 662 | pm34-pm36 | 0.996 | 1.028 | 0.975 | 1.075 | 0.011  | 0.369 |
| 663 | pm34-pm37 | 1.002 | 1.027 | 0.943 | 1.054 | 0      | 0.634 |

|     |           |       |       |       |       |       |       |
|-----|-----------|-------|-------|-------|-------|-------|-------|
| 664 | pm35-pm36 | 1.015 | 1.066 | 0.947 | 1.086 | 0.006 | 0.579 |
| 665 | pm35-pm37 | 1     | 1.038 | 0.925 | 1.138 | 0.004 | 0.607 |
| 666 | pm36-pm37 | 1.019 | 1.011 | 1.019 | 0.998 | 0.017 | 0.38  |

3b) Result of two-distribution perturbation analysis for hypertrophy when each response function was separately applied (10 million parameter sets)

| No. | Pair of perturbed parameter distributions | Lin   | Hill  | Sat   | Acc   | Synergistic effect | p-value |
|-----|-------------------------------------------|-------|-------|-------|-------|--------------------|---------|
| 1   | pm1-pm2                                   | 0.995 | 0.984 | 1     | 1.004 | -0.018             | 0.387   |
| 2   | pm1-pm3                                   | 1.009 | 1.043 | 0.998 | 1.046 | -0.001             | 0.822   |
| 3   | pm1-pm4                                   | 0.992 | 1.114 | 1.001 | 1.007 | -0.006             | 0.435   |
| 4   | pm1-pm5                                   | 1.037 | 0.994 | 1.027 | 0.99  | -0.003             | 0.753   |
| 5   | pm1-pm6                                   | 1.004 | 1.006 | 0.997 | 1.002 | -0.008             | 0.592   |
| 6   | pm1-pm7                                   | 2.802 | 2.076 | 2.705 | 2.249 | -0.102             | 0.006   |
| 7   | pm1-pm8                                   | 1.05  | 1.05  | 1.028 | 1.085 | 0.021              | 0.217   |
| 8   | pm1-pm9                                   | 1.055 | 1.078 | 1.038 | 1.03  | -0.002             | 0.912   |
| 9   | pm1-pm10                                  | 1.434 | 1.539 | 1.259 | 1.485 | -0.042             | 0.196   |
| 10  | pm1-pm11                                  | 1     | 0.998 | 1.01  | 1.012 | -0.005             | 0.574   |
| 11  | pm1-pm12                                  | 1.039 | 1.044 | 1.012 | 0.988 | -0.005             | 0.712   |
| 12  | pm1-pm13                                  | 0.93  | 0.921 | 0.917 | 0.84  | 0.03               | 0.218   |
| 13  | pm1-pm14                                  | 0.935 | 0.891 | 0.94  | 0.911 | 0.007              | 0.488   |
| 14  | pm1-pm15                                  | 1.107 | 1.217 | 1.129 | 1.005 | -0.063             | 0.036   |
| 15  | pm1-pm16                                  | 1.197 | 1.225 | 1.2   | 1.037 | -0.007             | 0.559   |
| 16  | pm1-pm17                                  | 1.165 | 1.179 | 1.181 | 1.052 | -0.046             | 0.163   |
| 17  | pm1-pm18                                  | 1.058 | 1.01  | 1.005 | 1.026 | 0.002              | 0.88    |
| 18  | pm1-pm19                                  | 1.012 | 1.08  | 1.057 | 1.029 | -0.007             | 0.483   |
| 19  | pm1-pm20                                  | 1.033 | 1.086 | 1.028 | 1.003 | 0.009              | 0.442   |



|    |          |       |       |       |       |        |       |
|----|----------|-------|-------|-------|-------|--------|-------|
| 20 | pm1-pm21 | 1.516 | 1.117 | 1.842 | 1.204 | -0.024 | 0.269 |
| 21 | pm1-pm22 | 1.01  | 1.058 | 1.005 | 0.984 | 0.012  | 0.335 |
| 22 | pm1-pm23 | 1.047 | 1.069 | 1.01  | 0.996 | 0.032  | 0.215 |
| 23 | pm1-pm24 | 0.993 | 1.081 | 1.009 | 1.015 | 0.006  | 0.411 |
| 24 | pm1-pm25 | 1.025 | 1.024 | 1.006 | 0.988 | 0      | 0.692 |
| 25 | pm1-pm26 | 1.012 | 1.056 | 1.016 | 0.987 | 0.007  | 0.574 |
| 26 | pm1-pm27 | 1.011 | 1.082 | 1.04  | 1.012 | -0.008 | 0.543 |
| 27 | pm1-pm28 | 1.009 | 1.037 | 1.023 | 1.008 | -0.008 | 0.531 |
| 28 | pm1-pm29 | 1.038 | 1.077 | 1.003 | 1.003 | 0.012  | 0.392 |
| 29 | pm1-pm30 | 1.047 | 1.009 | 1.027 | 1.015 | 0.001  | 0.644 |
| 30 | pm1-pm31 | 1.029 | 1.097 | 1.069 | 1.022 | 0.006  | 0.506 |
| 31 | pm1-pm32 | 1.019 | 1.011 | 1.013 | 1.089 | 0      | 0.723 |
| 32 | pm1-pm33 | 1.026 | 1.135 | 1.001 | 1.16  | -0.015 | 0.368 |
| 33 | pm1-pm34 | 0.971 | 1.039 | 0.941 | 1.084 | -0.014 | 0.38  |
| 34 | pm1-pm35 | 1.006 | 1.095 | 0.972 | 1.112 | 0.009  | 0.42  |
| 35 | pm1-pm36 | 1.029 | 1.037 | 1.007 | 1.005 | 0.008  | 0.444 |
| 36 | pm1-pm37 | 1.036 | 1.005 | 1.02  | 1.018 | 0.009  | 0.466 |
| 37 | pm2-pm3  | 0.995 | 0.996 | 0.968 | 1.031 | -0.013 | 0.373 |
| 38 | pm2-pm4  | 0.966 | 1.058 | 1.005 | 1.016 | -0.009 | 0.483 |
| 39 | pm2-pm5  | 1.01  | 0.995 | 1.026 | 1.016 | 0.01   | 0.378 |
| 40 | pm2-pm6  | 0.992 | 0.968 | 1.012 | 1.012 | 0      | 0.67  |
| 41 | pm2-pm7  | 2.862 | 1.995 | 2.617 | 2.246 | -0.116 | 0.006 |
| 42 | pm2-pm8  | 1.001 | 1.019 | 1.012 | 1.029 | -0.003 | 0.772 |
| 43 | pm2-pm9  | 1.059 | 1.059 | 1.032 | 1.024 | 0.005  | 0.545 |
| 44 | pm2-pm10 | 1.43  | 1.5   | 1.289 | 1.482 | -0.032 | 0.222 |
| 45 | pm2-pm11 | 1.008 | 0.985 | 0.993 | 1.009 | 0.002  | 0.845 |
| 46 | pm2-pm12 | 1.009 | 1.023 | 1.003 | 0.973 | -0.009 | 0.51  |
| 47 | pm2-pm13 | 0.889 | 0.85  | 0.933 | 0.838 | 0.019  | 0.352 |
| 48 | pm2-pm14 | 0.912 | 0.859 | 0.931 | 0.87  | -0.006 | 0.543 |
| 49 | pm2-pm15 | 1.082 | 1.175 | 1.134 | 1.034 | -0.057 | 0.027 |

|    |          |       |       |       |       |        |       |
|----|----------|-------|-------|-------|-------|--------|-------|
| 50 | pm2-pm16 | 1.132 | 1.152 | 1.167 | 1.051 | -0.032 | 0.254 |
| 51 | pm2-pm17 | 1.169 | 1.182 | 1.198 | 1.034 | -0.03  | 0.227 |
| 52 | pm2-pm18 | 1.013 | 1.007 | 1.002 | 1.014 | 0      | 0.667 |
| 53 | pm2-pm19 | 0.972 | 1.059 | 1.037 | 1.034 | -0.013 | 0.337 |
| 54 | pm2-pm20 | 1.012 | 1.023 | 0.992 | 1.057 | 0.006  | 0.55  |
| 55 | pm2-pm21 | 1.545 | 1.099 | 1.882 | 1.235 | 0.011  | 0.395 |
| 56 | pm2-pm22 | 0.996 | 1.024 | 0.984 | 0.986 | 0.009  | 0.557 |
| 57 | pm2-pm23 | 1.022 | 1.063 | 0.976 | 0.986 | 0.027  | 0.202 |
| 58 | pm2-pm24 | 0.979 | 1.016 | 0.998 | 0.988 | -0.009 | 0.438 |
| 59 | pm2-pm25 | 0.99  | 1.012 | 1.016 | 0.992 | 0.006  | 0.519 |
| 60 | pm2-pm26 | 1.02  | 0.975 | 0.992 | 0.985 | -0.004 | 0.6   |
| 61 | pm2-pm27 | 1.027 | 1.056 | 1.042 | 1.022 | 0.006  | 0.508 |
| 62 | pm2-pm28 | 1.025 | 1.028 | 1.022 | 1.038 | 0.015  | 0.31  |
| 63 | pm2-pm29 | 0.989 | 1.021 | 0.98  | 1.004 | -0.006 | 0.533 |
| 64 | pm2-pm30 | 1.025 | 1.031 | 0.992 | 1.001 | 0.003  | 0.664 |
| 65 | pm2-pm31 | 1.043 | 1.114 | 1.046 | 1.008 | 0.018  | 0.337 |
| 66 | pm2-pm32 | 0.992 | 1.029 | 0.998 | 1.077 | 0.005  | 0.739 |
| 67 | pm2-pm33 | 1.002 | 1.16  | 0.99  | 1.136 | -0.01  | 0.498 |
| 68 | pm2-pm34 | 0.977 | 1.015 | 0.958 | 1.069 | -0.004 | 0.664 |
| 69 | pm2-pm35 | 0.999 | 1.032 | 0.961 | 1.127 | 0.006  | 0.537 |
| 70 | pm2-pm36 | 1.01  | 1.036 | 0.978 | 1.016 | 0.013  | 0.301 |
| 71 | pm2-pm37 | 1.026 | 0.995 | 1.001 | 1.012 | 0.012  | 0.31  |
| 72 | pm3-pm4  | 0.996 | 1.093 | 0.998 | 1.025 | -0.003 | 0.835 |
| 73 | pm3-pm5  | 1.029 | 1.012 | 0.984 | 1.02  | -0.001 | 0.743 |
| 74 | pm3-pm6  | 1.011 | 1.008 | 0.986 | 1.01  | -0.004 | 0.845 |
| 75 | pm3-pm7  | 2.893 | 1.954 | 2.658 | 2.247 | -0.119 | 0.009 |
| 76 | pm3-pm8  | 1.002 | 1.008 | 0.976 | 1.051 | -0.02  | 0.386 |
| 77 | pm3-pm9  | 1.079 | 1.066 | 1.043 | 1.053 | 0.01   | 0.372 |
| 78 | pm3-pm10 | 1.458 | 1.498 | 1.233 | 1.564 | -0.03  | 0.235 |
| 79 | pm3-pm11 | 0.988 | 1.029 | 0.997 | 1.026 | 0.003  | 0.974 |

|     |          |       |       |       |       |        |       |
|-----|----------|-------|-------|-------|-------|--------|-------|
| 80  | pm3-pm12 | 0.999 | 1.053 | 1.025 | 1.02  | 0.002  | 0.78  |
| 81  | pm3-pm13 | 0.936 | 0.89  | 0.9   | 0.861 | 0.028  | 0.2   |
| 82  | pm3-pm14 | 0.927 | 0.952 | 0.921 | 0.889 | 0.012  | 0.36  |
| 83  | pm3-pm15 | 1.098 | 1.204 | 1.093 | 1.071 | -0.058 | 0.033 |
| 84  | pm3-pm16 | 1.156 | 1.152 | 1.174 | 1.115 | -0.019 | 0.373 |
| 85  | pm3-pm17 | 1.165 | 1.199 | 1.141 | 1.061 | -0.045 | 0.168 |
| 86  | pm3-pm18 | 1.051 | 1.01  | 0.968 | 1.042 | -0.002 | 0.719 |
| 87  | pm3-pm19 | 0.993 | 1.074 | 1.008 | 1.033 | -0.022 | 0.247 |
| 88  | pm3-pm20 | 1.032 | 1.013 | 0.985 | 1.051 | -0.006 | 0.489 |
| 89  | pm3-pm21 | 1.507 | 1.149 | 1.819 | 1.2   | -0.022 | 0.272 |
| 90  | pm3-pm22 | 0.984 | 1.045 | 0.995 | 1.014 | 0.01   | 0.478 |
| 91  | pm3-pm23 | 1.002 | 1.069 | 0.995 | 1.029 | 0.028  | 0.218 |
| 92  | pm3-pm24 | 0.995 | 1.05  | 1.007 | 1.018 | 0.001  | 0.91  |
| 93  | pm3-pm25 | 1.012 | 0.982 | 0.978 | 0.992 | -0.017 | 0.339 |
| 94  | pm3-pm26 | 0.996 | 0.99  | 1.011 | 1.027 | -0.002 | 0.98  |
| 95  | pm3-pm27 | 1.011 | 1.041 | 1.001 | 1.033 | -0.02  | 0.207 |
| 96  | pm3-pm28 | 1.024 | 1.009 | 1.005 | 1.062 | 0      | 0.691 |
| 97  | pm3-pm29 | 1.008 | 1.056 | 1.002 | 1.028 | 0.008  | 0.518 |
| 98  | pm3-pm30 | 1.038 | 1.024 | 0.987 | 1.03  | 0      | 0.766 |
| 99  | pm3-pm31 | 1.023 | 1.092 | 1.019 | 1.018 | -0.008 | 0.454 |
| 100 | pm3-pm32 | 1.002 | 1.039 | 0.983 | 1.105 | 0.001  | 0.968 |
| 101 | pm3-pm33 | 1.01  | 1.112 | 0.994 | 1.182 | -0.019 | 0.344 |
| 102 | pm3-pm34 | 1.022 | 1.016 | 0.945 | 1.095 | -0.001 | 0.958 |
| 103 | pm3-pm35 | 1.065 | 1.033 | 0.909 | 1.109 | -0.006 | 0.489 |
| 104 | pm3-pm36 | 0.994 | 0.998 | 0.989 | 1.004 | -0.013 | 0.309 |
| 105 | pm3-pm37 | 1.006 | 1.041 | 0.985 | 1.026 | 0.007  | 0.582 |
| 106 | pm4-pm5  | 1.03  | 1.114 | 0.972 | 1.016 | 0.011  | 0.363 |
| 107 | pm4-pm6  | 0.994 | 1.104 | 1     | 1.036 | 0.016  | 0.309 |
| 108 | pm4-pm7  | 2.835 | 2.119 | 2.628 | 2.33  | -0.089 | 0.018 |
| 109 | pm4-pm8  | 1.008 | 1.073 | 0.978 | 1.061 | -0.009 | 0.598 |

|     |          |       |       |       |       |        |       |
|-----|----------|-------|-------|-------|-------|--------|-------|
| 110 | pm4-pm9  | 1.076 | 1.142 | 1.052 | 1.046 | 0.02   | 0.291 |
| 111 | pm4-pm10 | 1.448 | 1.57  | 1.258 | 1.518 | -0.03  | 0.265 |
| 112 | pm4-pm11 | 1.017 | 1.066 | 0.995 | 1.001 | 0.003  | 0.775 |
| 113 | pm4-pm12 | 1.004 | 1.101 | 0.996 | 1.011 | -0.004 | 0.68  |
| 114 | pm4-pm13 | 0.888 | 0.94  | 0.91  | 0.865 | 0.021  | 0.257 |
| 115 | pm4-pm14 | 0.936 | 0.925 | 0.966 | 0.874 | 0.006  | 0.593 |
| 116 | pm4-pm15 | 1.105 | 1.288 | 1.116 | 1.036 | -0.048 | 0.158 |
| 117 | pm4-pm16 | 1.173 | 1.245 | 1.157 | 1.11  | -0.007 | 0.548 |
| 118 | pm4-pm17 | 1.145 | 1.23  | 1.203 | 1.069 | -0.035 | 0.202 |
| 119 | pm4-pm18 | 1.006 | 1.092 | 1.001 | 1.033 | 0.004  | 0.65  |
| 120 | pm4-pm19 | 0.958 | 1.138 | 1.026 | 1.036 | -0.019 | 0.332 |
| 121 | pm4-pm20 | 1.029 | 1.1   | 1.006 | 1.045 | 0.009  | 0.445 |
| 122 | pm4-pm21 | 1.524 | 1.168 | 1.818 | 1.183 | -0.027 | 0.283 |
| 123 | pm4-pm22 | 1.016 | 1.142 | 0.998 | 0.995 | 0.028  | 0.266 |
| 124 | pm4-pm23 | 1.025 | 1.147 | 0.988 | 1.043 | 0.045  | 0.183 |
| 125 | pm4-pm24 | 0.986 | 1.123 | 0.995 | 1.01  | 0.003  | 0.8   |
| 126 | pm4-pm25 | 0.996 | 1.106 | 0.987 | 1.01  | 0.007  | 0.481 |
| 127 | pm4-pm26 | 1.018 | 1.092 | 0.999 | 1.02  | 0.014  | 0.354 |
| 128 | pm4-pm27 | 1.011 | 1.111 | 1.024 | 1.025 | -0.009 | 0.503 |
| 129 | pm4-pm28 | 1.003 | 1.103 | 1.003 | 1.034 | 0.002  | 0.633 |
| 130 | pm4-pm29 | 1.02  | 1.171 | 0.972 | 1.044 | 0.026  | 0.214 |
| 131 | pm4-pm30 | 1.02  | 1.092 | 0.998 | 1.025 | 0.004  | 0.657 |
| 132 | pm4-pm31 | 1.044 | 1.184 | 1.046 | 1.045 | 0.024  | 0.29  |
| 133 | pm4-pm32 | 0.999 | 1.081 | 1.005 | 1.054 | -0.005 | 0.474 |
| 134 | pm4-pm33 | 1.008 | 1.171 | 0.971 | 1.2   | -0.015 | 0.316 |
| 135 | pm4-pm34 | 1.012 | 1.164 | 0.959 | 1.065 | 0.02   | 0.228 |
| 136 | pm4-pm35 | 1.02  | 1.125 | 0.957 | 1.12  | 0.011  | 0.359 |
| 137 | pm4-pm36 | 1.01  | 1.06  | 1.015 | 0.993 | 0.001  | 0.984 |
| 138 | pm4-pm37 | 1.026 | 1.074 | 0.994 | 1.029 | 0.013  | 0.394 |
| 139 | pm5-pm6  | 0.982 | 1.014 | 1.02  | 1.011 | 0.008  | 0.455 |

|     |          |       |       |       |       |        |       |
|-----|----------|-------|-------|-------|-------|--------|-------|
| 140 | pm5-pm7  | 2.827 | 1.983 | 2.656 | 2.272 | -0.114 | 0.009 |
| 141 | pm5-pm8  | 1.036 | 0.989 | 1.004 | 1.055 | 0.001  | 0.975 |
| 142 | pm5-pm9  | 1.071 | 1.061 | 1.015 | 1.017 | 0      | 0.779 |
| 143 | pm5-pm10 | 1.459 | 1.487 | 1.21  | 1.493 | -0.048 | 0.182 |
| 144 | pm5-pm11 | 0.996 | 0.981 | 1.005 | 1.006 | -0.001 | 0.827 |
| 145 | pm5-pm12 | 1.001 | 1.024 | 1.015 | 1.014 | 0      | 0.924 |
| 146 | pm5-pm13 | 0.911 | 0.832 | 0.899 | 0.838 | 0.01   | 0.505 |
| 147 | pm5-pm14 | 0.919 | 0.898 | 0.957 | 0.9   | 0.017  | 0.307 |
| 148 | pm5-pm15 | 1.145 | 1.154 | 1.121 | 1.027 | -0.054 | 0.025 |
| 149 | pm5-pm16 | 1.128 | 1.139 | 1.125 | 1.1   | -0.037 | 0.271 |
| 150 | pm5-pm17 | 1.18  | 1.149 | 1.213 | 1.041 | -0.032 | 0.244 |
| 151 | pm5-pm18 | 1.036 | 0.987 | 0.985 | 1.019 | -0.004 | 0.905 |
| 152 | pm5-pm19 | 0.995 | 1.012 | 1.016 | 1.052 | -0.022 | 0.269 |
| 153 | pm5-pm20 | 1.01  | 1.043 | 1.018 | 1.026 | 0.007  | 0.587 |
| 154 | pm5-pm21 | 1.55  | 1.106 | 1.835 | 1.222 | -0.003 | 0.898 |
| 155 | pm5-pm22 | 1.015 | 1.03  | 1.018 | 1.001 | 0.025  | 0.293 |
| 156 | pm5-pm23 | 1.015 | 1.08  | 1.028 | 1.01  | 0.046  | 0.184 |
| 157 | pm5-pm24 | 0.975 | 1.042 | 0.991 | 0.998 | -0.006 | 0.595 |
| 158 | pm5-pm25 | 0.989 | 0.983 | 0.998 | 1.006 | -0.005 | 0.836 |
| 159 | pm5-pm26 | 1.008 | 1     | 1.02  | 1.004 | 0.008  | 0.591 |
| 160 | pm5-pm27 | 1.02  | 1.084 | 1.065 | 1.034 | 0.018  | 0.396 |
| 161 | pm5-pm28 | 1.002 | 0.997 | 1.01  | 1.034 | -0.005 | 0.985 |
| 162 | pm5-pm29 | 1.023 | 1.036 | 0.984 | 1.032 | 0.012  | 0.388 |
| 163 | pm5-pm30 | 1.05  | 1.058 | 0.988 | 0.996 | 0.011  | 0.325 |
| 164 | pm5-pm31 | 1.028 | 1.092 | 1.051 | 1.009 | 0.008  | 0.459 |
| 165 | pm5-pm32 | 0.993 | 1.018 | 1.019 | 1.086 | 0.007  | 0.464 |
| 166 | pm5-pm33 | 1.016 | 1.165 | 0.965 | 1.142 | -0.012 | 0.369 |
| 167 | pm5-pm34 | 0.994 | 1.009 | 0.918 | 1.086 | -0.009 | 0.566 |
| 168 | pm5-pm35 | 1.038 | 1.036 | 0.924 | 1.153 | 0.012  | 0.366 |
| 169 | pm5-pm36 | 1.017 | 1.009 | 0.992 | 0.995 | 0.003  | 0.912 |

|     |          |       |       |       |       |        |       |
|-----|----------|-------|-------|-------|-------|--------|-------|
| 170 | pm5-pm37 | 1.011 | 0.966 | 1.007 | 1.006 | -0.001 | 0.946 |
| 171 | pm6-pm7  | 2.804 | 2.013 | 2.675 | 2.235 | -0.111 | 0.006 |
| 172 | pm6-pm8  | 1.032 | 1.014 | 0.996 | 1.068 | 0.012  | 0.389 |
| 173 | pm6-pm9  | 1.068 | 1.094 | 1.019 | 1.034 | 0.018  | 0.362 |
| 174 | pm6-pm10 | 1.432 | 1.467 | 1.281 | 1.527 | -0.028 | 0.298 |
| 175 | pm6-pm11 | 0.989 | 0.997 | 0.995 | 1.023 | 0.008  | 0.528 |
| 176 | pm6-pm12 | 1.014 | 1.024 | 1.011 | 1.012 | 0.007  | 0.496 |
| 177 | pm6-pm13 | 0.845 | 0.84  | 0.916 | 0.834 | 0.003  | 0.813 |
| 178 | pm6-pm14 | 0.931 | 0.894 | 0.925 | 0.871 | 0.009  | 0.544 |
| 179 | pm6-pm15 | 1.104 | 1.2   | 1.106 | 1.001 | -0.057 | 0.033 |
| 180 | pm6-pm16 | 1.16  | 1.169 | 1.194 | 1.056 | -0.01  | 0.431 |
| 181 | pm6-pm17 | 1.154 | 1.175 | 1.209 | 1.045 | -0.027 | 0.299 |
| 182 | pm6-pm18 | 1.032 | 1.023 | 0.988 | 1.023 | 0.011  | 0.369 |
| 183 | pm6-pm19 | 0.999 | 1.106 | 1.033 | 1.004 | 0      | 0.841 |
| 184 | pm6-pm20 | 1.037 | 1.054 | 1     | 1.005 | 0.012  | 0.372 |
| 185 | pm6-pm21 | 1.54  | 1.157 | 1.885 | 1.239 | 0.029  | 0.271 |
| 186 | pm6-pm22 | 0.982 | 1.036 | 0.974 | 1.002 | 0.013  | 0.333 |
| 187 | pm6-pm23 | 0.994 | 1.067 | 0.984 | 0.974 | 0.023  | 0.212 |
| 188 | pm6-pm24 | 0.976 | 1.012 | 0.983 | 1.004 | -0.008 | 0.457 |
| 189 | pm6-pm25 | 0.98  | 1.016 | 0.999 | 1.007 | 0.007  | 0.492 |
| 190 | pm6-pm26 | 0.998 | 0.994 | 0.986 | 0.985 | -0.003 | 0.898 |
| 191 | pm6-pm27 | 1.037 | 1.071 | 1.026 | 1.02  | 0.01   | 0.346 |
| 192 | pm6-pm28 | 1.013 | 1.012 | 0.991 | 1.042 | 0.004  | 0.916 |
| 193 | pm6-pm29 | 0.989 | 1.039 | 0.988 | 1.015 | 0.006  | 0.585 |
| 194 | pm6-pm30 | 1.033 | 1.036 | 1.009 | 1.032 | 0.021  | 0.27  |
| 195 | pm6-pm31 | 1.06  | 1.078 | 1.028 | 1.003 | 0.01   | 0.349 |
| 196 | pm6-pm32 | 0.99  | 1.036 | 1.003 | 1.047 | 0.002  | 0.752 |
| 197 | pm6-pm33 | 0.998 | 1.114 | 1.01  | 1.186 | -0.002 | 0.802 |
| 198 | pm6-pm34 | 0.977 | 1.021 | 0.911 | 1.069 | -0.011 | 0.332 |
| 199 | pm6-pm35 | 1.023 | 1.061 | 0.965 | 1.111 | 0.019  | 0.337 |

|     |          |       |       |       |       |        |        |
|-----|----------|-------|-------|-------|-------|--------|--------|
| 200 | pm6-pm36 | 0.995 | 1.017 | 0.978 | 1.014 | 0.006  | 0.483  |
| 201 | pm6-pm37 | 0.989 | 1.005 | 1     | 0.999 | 0.005  | 0.616  |
| 202 | pm7-pm8  | 2.857 | 2.013 | 2.619 | 2.304 | -0.116 | 0.005  |
| 203 | pm7-pm9  | 2.949 | 2.144 | 2.698 | 2.272 | -0.069 | 0.031  |
| 204 | pm7-pm10 | 3.888 | 3.013 | 3.25  | 3.287 | 0.355  | <0.001 |
| 205 | pm7-pm11 | 2.859 | 2.011 | 2.603 | 2.25  | -0.112 | 0.006  |
| 206 | pm7-pm12 | 2.812 | 2     | 2.61  | 2.296 | -0.128 | 0.005  |
| 207 | pm7-pm13 | 2.884 | 2.126 | 2.819 | 2.328 | 0.134  | 0.01   |
| 208 | pm7-pm14 | 2.988 | 2.187 | 2.887 | 2.383 | 0.166  | 0.002  |
| 209 | pm7-pm15 | 3.044 | 2.395 | 2.928 | 2.355 | -0.03  | 0.269  |
| 210 | pm7-pm16 | 3.16  | 2.335 | 3.106 | 2.392 | 0.044  | 0.165  |
| 211 | pm7-pm17 | 3.174 | 2.29  | 3.16  | 2.328 | 0.016  | 0.38   |
| 212 | pm7-pm18 | 2.828 | 2.051 | 2.658 | 2.294 | -0.097 | 0.016  |
| 213 | pm7-pm19 | 2.81  | 2.006 | 2.737 | 2.265 | -0.13  | 0.006  |
| 214 | pm7-pm20 | 2.862 | 2.035 | 2.631 | 2.253 | -0.116 | 0.01   |
| 215 | pm7-pm21 | 4.102 | 2.215 | 4.559 | 2.699 | 0.418  | <0.001 |
| 216 | pm7-pm22 | 2.775 | 2.062 | 2.635 | 2.297 | -0.093 | 0.014  |
| 217 | pm7-pm23 | 2.822 | 2.102 | 2.622 | 2.265 | -0.079 | 0.014  |
| 218 | pm7-pm24 | 2.845 | 2.01  | 2.637 | 2.226 | -0.122 | 0.007  |
| 219 | pm7-pm25 | 2.784 | 2.042 | 2.664 | 2.249 | -0.109 | 0.009  |
| 220 | pm7-pm26 | 2.739 | 2.01  | 2.633 | 2.246 | -0.137 | 0.01   |
| 221 | pm7-pm27 | 2.807 | 2.102 | 2.67  | 2.213 | -0.13  | 0.006  |
| 222 | pm7-pm28 | 2.887 | 2.027 | 2.638 | 2.272 | -0.104 | 0.007  |
| 223 | pm7-pm29 | 2.865 | 2.007 | 2.652 | 2.273 | -0.102 | 0.008  |
| 224 | pm7-pm30 | 2.833 | 2.055 | 2.61  | 2.246 | -0.12  | 0.009  |
| 225 | pm7-pm31 | 2.873 | 2.148 | 2.683 | 2.302 | -0.08  | 0.011  |
| 226 | pm7-pm32 | 2.833 | 2.051 | 2.645 | 2.357 | -0.095 | 0.014  |
| 227 | pm7-pm33 | 2.773 | 2.216 | 2.731 | 2.484 | -0.077 | 0.013  |
| 228 | pm7-pm34 | 2.882 | 2.077 | 2.553 | 2.31  | -0.1   | 0.013  |
| 229 | pm7-pm35 | 2.925 | 2.101 | 2.492 | 2.451 | -0.078 | 0.011  |

|     |          |       |       |       |       |        |       |
|-----|----------|-------|-------|-------|-------|--------|-------|
| 230 | pm7-pm36 | 2.86  | 1.923 | 2.675 | 2.22  | -0.125 | 0.007 |
| 231 | pm7-pm37 | 2.789 | 1.968 | 2.646 | 2.206 | -0.141 | 0.008 |
| 232 | pm8-pm9  | 1.077 | 1.099 | 1.037 | 1.073 | 0.014  | 0.344 |
| 233 | pm8-pm10 | 1.437 | 1.467 | 1.279 | 1.541 | -0.045 | 0.186 |
| 234 | pm8-pm11 | 1.023 | 1.012 | 1.015 | 1.073 | 0.016  | 0.36  |
| 235 | pm8-pm12 | 1.047 | 1.04  | 0.989 | 1.03  | -0.003 | 0.605 |
| 236 | pm8-pm13 | 0.926 | 0.876 | 0.931 | 0.878 | 0.026  | 0.246 |
| 237 | pm8-pm14 | 0.927 | 0.877 | 0.944 | 0.912 | -0.002 | 0.736 |
| 238 | pm8-pm15 | 1.11  | 1.184 | 1.125 | 1.077 | -0.058 | 0.044 |
| 239 | pm8-pm16 | 1.186 | 1.17  | 1.144 | 1.127 | -0.019 | 0.326 |
| 240 | pm8-pm17 | 1.166 | 1.191 | 1.196 | 1.102 | -0.03  | 0.244 |
| 241 | pm8-pm18 | 1.054 | 1.003 | 1.008 | 1.069 | 0.006  | 0.524 |
| 242 | pm8-pm19 | 1.012 | 1.079 | 1.051 | 1.1   | 0.004  | 0.757 |
| 243 | pm8-pm20 | 1.044 | 1.02  | 1.004 | 1.038 | -0.007 | 0.424 |
| 244 | pm8-pm21 | 1.556 | 1.09  | 1.844 | 1.247 | -0.013 | 0.333 |
| 245 | pm8-pm22 | 1.07  | 1.06  | 0.982 | 1.022 | 0.026  | 0.201 |
| 246 | pm8-pm23 | 1.025 | 1.057 | 1.007 | 1.042 | 0.029  | 0.223 |
| 247 | pm8-pm24 | 0.999 | 1.042 | 0.991 | 1.021 | -0.01  | 0.38  |
| 248 | pm8-pm25 | 1.04  | 1.004 | 0.992 | 1.026 | 0      | 0.714 |
| 249 | pm8-pm26 | 1.029 | 1.014 | 1.009 | 1.06  | 0.012  | 0.324 |
| 250 | pm8-pm27 | 1.043 | 1.063 | 1.012 | 1.027 | -0.013 | 0.336 |
| 251 | pm8-pm28 | 1.004 | 1.026 | 1.016 | 1.071 | -0.002 | 0.623 |
| 252 | pm8-pm29 | 1.033 | 1.085 | 1.003 | 1.066 | 0.023  | 0.2   |
| 253 | pm8-pm30 | 1.037 | 1.004 | 1.009 | 1.018 | -0.011 | 0.318 |
| 254 | pm8-pm31 | 1.051 | 1.102 | 1.036 | 1.049 | 0.006  | 0.442 |
| 255 | pm8-pm32 | 1.032 | 1.064 | 1.013 | 1.151 | 0.027  | 0.299 |
| 256 | pm8-pm33 | 1.008 | 1.129 | 1.004 | 1.206 | -0.014 | 0.312 |
| 257 | pm8-pm34 | 1.011 | 0.992 | 0.93  | 1.1   | -0.019 | 0.321 |
| 258 | pm8-pm35 | 1.042 | 1.05  | 0.973 | 1.171 | 0.016  | 0.353 |
| 259 | pm8-pm36 | 1.037 | 0.992 | 1.02  | 1.035 | 0.005  | 0.925 |



|     |           |       |       |       |       |        |       |
|-----|-----------|-------|-------|-------|-------|--------|-------|
| 260 | pm8-pm37  | 1.039 | 0.993 | 1.008 | 1.058 | 0.009  | 0.56  |
| 261 | pm9-pm10  | 1.492 | 1.575 | 1.306 | 1.492 | -0.03  | 0.254 |
| 262 | pm9-pm11  | 1.065 | 1.068 | 0.995 | 1.053 | 0.01   | 0.427 |
| 263 | pm9-pm12  | 1.088 | 1.114 | 1.047 | 1.043 | 0.022  | 0.259 |
| 264 | pm9-pm13  | 0.936 | 0.915 | 0.912 | 0.887 | 0.015  | 0.365 |
| 265 | pm9-pm14  | 0.936 | 0.93  | 0.927 | 0.92  | -0.009 | 0.462 |
| 266 | pm9-pm15  | 1.147 | 1.266 | 1.172 | 1.064 | -0.04  | 0.195 |
| 267 | pm9-pm16  | 1.232 | 1.252 | 1.181 | 1.088 | -0.008 | 0.524 |
| 268 | pm9-pm17  | 1.202 | 1.207 | 1.265 | 1.11  | -0.019 | 0.369 |
| 269 | pm9-pm18  | 1.072 | 1.091 | 1.036 | 1.066 | 0.019  | 0.345 |
| 270 | pm9-pm19  | 1.067 | 1.106 | 1.038 | 1.096 | 0      | 0.794 |
| 271 | pm9-pm20  | 1.058 | 1.095 | 0.998 | 1.048 | -0.004 | 0.806 |
| 272 | pm9-pm21  | 1.623 | 1.205 | 1.888 | 1.263 | 0.026  | 0.243 |
| 273 | pm9-pm22  | 1.044 | 1.155 | 1.024 | 1.018 | 0.032  | 0.232 |
| 274 | pm9-pm23  | 1.078 | 1.13  | 1.029 | 1.029 | 0.042  | 0.193 |
| 275 | pm9-pm24  | 1.052 | 1.136 | 1.002 | 1.027 | 0.01   | 0.386 |
| 276 | pm9-pm25  | 1.072 | 1.09  | 1.043 | 1.012 | 0.018  | 0.373 |
| 277 | pm9-pm26  | 1.043 | 1.079 | 1.019 | 1.039 | 0.009  | 0.526 |
| 278 | pm9-pm27  | 1.081 | 1.145 | 1.058 | 1.042 | 0.012  | 0.394 |
| 279 | pm9-pm28  | 1.081 | 1.107 | 1.005 | 1.034 | 0.005  | 0.799 |
| 280 | pm9-pm29  | 1.066 | 1.146 | 1.053 | 1.021 | 0.028  | 0.2   |
| 281 | pm9-pm30  | 1.088 | 1.129 | 1.022 | 1.047 | 0.023  | 0.297 |
| 282 | pm9-pm31  | 1.057 | 1.194 | 1.06  | 1.046 | 0.016  | 0.311 |
| 283 | pm9-pm32  | 1.063 | 1.098 | 1.011 | 1.116 | 0.013  | 0.329 |
| 284 | pm9-pm33  | 1.022 | 1.164 | 1.005 | 1.165 | -0.032 | 0.206 |
| 285 | pm9-pm34  | 1.029 | 1.125 | 1.007 | 1.082 | 0.013  | 0.355 |
| 286 | pm9-pm35  | 1.062 | 1.152 | 0.966 | 1.107 | 0.009  | 0.409 |
| 287 | pm9-pm36  | 1.051 | 1.079 | 1.039 | 1.031 | 0.013  | 0.303 |
| 288 | pm9-pm37  | 1.049 | 1.061 | 1.019 | 1.034 | 0.005  | 0.448 |
| 289 | pm10-pm11 | 1.481 | 1.517 | 1.272 | 1.501 | -0.012 | 0.307 |

|     |           |       |       |       |       |        |       |
|-----|-----------|-------|-------|-------|-------|--------|-------|
| 290 | pm10-pm12 | 1.43  | 1.596 | 1.275 | 1.531 | -0.012 | 0.334 |
| 291 | pm10-pm13 | 1.298 | 1.318 | 1.187 | 1.273 | -0.048 | 0.186 |
| 292 | pm10-pm14 | 1.518 | 1.489 | 1.39  | 1.49  | 0.115  | 0.008 |
| 293 | pm10-pm15 | 1.573 | 1.81  | 1.389 | 1.544 | -0.043 | 0.163 |
| 294 | pm10-pm16 | 1.594 | 1.709 | 1.435 | 1.576 | -0.037 | 0.224 |
| 295 | pm10-pm17 | 1.64  | 1.68  | 1.488 | 1.54  | -0.047 | 0.173 |
| 296 | pm10-pm18 | 1.398 | 1.493 | 1.247 | 1.53  | -0.05  | 0.029 |
| 297 | pm10-pm19 | 1.435 | 1.61  | 1.303 | 1.536 | -0.025 | 0.216 |
| 298 | pm10-pm20 | 1.434 | 1.52  | 1.264 | 1.46  | -0.054 | 0.037 |
| 299 | pm10-pm21 | 1.997 | 1.582 | 2.133 | 1.677 | -0.04  | 0.193 |
| 300 | pm10-pm22 | 1.368 | 1.63  | 1.281 | 1.447 | -0.016 | 0.39  |
| 301 | pm10-pm23 | 1.435 | 1.475 | 1.281 | 1.455 | -0.032 | 0.294 |
| 302 | pm10-pm24 | 1.43  | 1.54  | 1.278 | 1.494 | -0.027 | 0.247 |
| 303 | pm10-pm25 | 1.461 | 1.488 | 1.251 | 1.505 | -0.029 | 0.218 |
| 304 | pm10-pm26 | 1.394 | 1.505 | 1.245 | 1.454 | -0.056 | 0.039 |
| 305 | pm10-pm27 | 1.462 | 1.604 | 1.299 | 1.509 | -0.02  | 0.281 |
| 306 | pm10-pm28 | 1.464 | 1.569 | 1.293 | 1.546 | -0.004 | 0.681 |
| 307 | pm10-pm29 | 1.435 | 1.541 | 1.289 | 1.47  | -0.029 | 0.245 |
| 308 | pm10-pm30 | 1.382 | 1.555 | 1.239 | 1.517 | -0.044 | 0.153 |
| 309 | pm10-pm31 | 1.476 | 1.632 | 1.284 | 1.514 | -0.017 | 0.313 |
| 310 | pm10-pm32 | 1.406 | 1.565 | 1.235 | 1.608 | -0.024 | 0.243 |
| 311 | pm10-pm33 | 1.438 | 1.603 | 1.266 | 1.718 | -0.034 | 0.204 |
| 312 | pm10-pm34 | 1.446 | 1.521 | 1.213 | 1.572 | -0.029 | 0.28  |
| 313 | pm10-pm35 | 1.447 | 1.537 | 1.179 | 1.62  | -0.036 | 0.264 |
| 314 | pm10-pm36 | 1.398 | 1.477 | 1.267 | 1.484 | -0.049 | 0.166 |
| 315 | pm10-pm37 | 1.419 | 1.454 | 1.267 | 1.456 | -0.056 | 0.033 |
| 316 | pm11-pm12 | 0.998 | 1.002 | 0.987 | 0.983 | -0.016 | 0.344 |
| 317 | pm11-pm13 | 0.91  | 0.858 | 0.903 | 0.819 | 0.018  | 0.366 |
| 318 | pm11-pm14 | 0.932 | 0.834 | 0.907 | 0.879 | -0.007 | 0.476 |
| 319 | pm11-pm15 | 1.095 | 1.198 | 1.141 | 1.051 | -0.039 | 0.285 |

|     |           |       |       |       |       |        |       |
|-----|-----------|-------|-------|-------|-------|--------|-------|
| 320 | pm11-pm16 | 1.195 | 1.159 | 1.177 | 1.088 | 0.001  | 0.666 |
| 321 | pm11-pm17 | 1.167 | 1.175 | 1.24  | 1.033 | -0.019 | 0.395 |
| 322 | pm11-pm18 | 1.011 | 1.009 | 1.013 | 1.015 | 0.006  | 0.591 |
| 323 | pm11-pm19 | 0.996 | 1.035 | 1.004 | 1.031 | -0.018 | 0.382 |
| 324 | pm11-pm20 | 1.025 | 1.024 | 1.009 | 1.03  | 0.01   | 0.373 |
| 325 | pm11-pm21 | 1.518 | 1.124 | 1.808 | 1.204 | -0.012 | 0.384 |
| 326 | pm11-pm22 | 1.023 | 1.046 | 0.989 | 0.992 | 0.027  | 0.262 |
| 327 | pm11-pm23 | 1.024 | 1.058 | 1.003 | 1.026 | 0.046  | 0.161 |
| 328 | pm11-pm24 | 0.997 | 1.051 | 1.008 | 0.989 | 0.01   | 0.523 |
| 329 | pm11-pm25 | 0.997 | 0.991 | 1.001 | 0.994 | 0.002  | 0.725 |
| 330 | pm11-pm26 | 1.004 | 0.99  | 1.017 | 1     | 0.009  | 0.51  |
| 331 | pm11-pm27 | 1.006 | 1.022 | 1.002 | 1.005 | -0.019 | 0.343 |
| 332 | pm11-pm28 | 1.031 | 1.055 | 0.981 | 1.029 | 0.014  | 0.35  |
| 333 | pm11-pm29 | 0.988 | 1.02  | 1.008 | 0.979 | -0.003 | 0.632 |
| 334 | pm11-pm30 | 1.026 | 1.023 | 0.996 | 1.013 | 0.008  | 0.42  |
| 335 | pm11-pm31 | 1.005 | 1.062 | 1.04  | 1.008 | -0.003 | 0.961 |
| 336 | pm11-pm32 | 1.005 | 1.02  | 0.98  | 1.061 | 0      | 0.771 |
| 337 | pm11-pm33 | 0.994 | 1.102 | 0.986 | 1.205 | -0.007 | 0.586 |
| 338 | pm11-pm34 | 0.986 | 1.063 | 0.907 | 1.06  | -0.002 | 0.69  |
| 339 | pm11-pm35 | 1.023 | 1.051 | 0.932 | 1.114 | 0.009  | 0.41  |
| 340 | pm11-pm36 | 0.985 | 1.006 | 0.998 | 1.008 | 0.005  | 0.626 |
| 341 | pm11-pm37 | 0.979 | 0.998 | 0.978 | 1.002 | -0.004 | 0.798 |
| 342 | pm12-pm13 | 0.879 | 0.916 | 0.915 | 0.831 | 0.015  | 0.359 |
| 343 | pm12-pm14 | 0.924 | 0.939 | 0.926 | 0.864 | 0.003  | 0.648 |
| 344 | pm12-pm15 | 1.082 | 1.177 | 1.124 | 1.041 | -0.07  | 0.04  |
| 345 | pm12-pm16 | 1.171 | 1.192 | 1.137 | 1.099 | -0.02  | 0.371 |
| 346 | pm12-pm17 | 1.185 | 1.105 | 1.209 | 1.043 | -0.052 | 0.023 |
| 347 | pm12-pm18 | 1.037 | 1.023 | 1.004 | 1.006 | -0.003 | 0.794 |
| 348 | pm12-pm19 | 0.995 | 1.032 | 1.029 | 1.049 | -0.024 | 0.291 |
| 349 | pm12-pm20 | 1.038 | 1.036 | 1.004 | 1.025 | -0.001 | 0.87  |

|     |           |       |       |       |       |        |       |
|-----|-----------|-------|-------|-------|-------|--------|-------|
| 350 | pm12-pm21 | 1.524 | 1.144 | 1.781 | 1.21  | -0.027 | 0.28  |
| 351 | pm12-pm22 | 1.008 | 1.026 | 0.985 | 1.016 | 0.008  | 0.51  |
| 352 | pm12-pm23 | 1.031 | 1.069 | 0.996 | 1.026 | 0.033  | 0.286 |
| 353 | pm12-pm24 | 0.996 | 1.048 | 1.004 | 1.003 | -0.004 | 0.933 |
| 354 | pm12-pm25 | 1.008 | 0.998 | 0.992 | 1.006 | -0.008 | 0.504 |
| 355 | pm12-pm26 | 1.016 | 1.016 | 1.017 | 1.024 | 0.009  | 0.478 |
| 356 | pm12-pm27 | 1.054 | 1.088 | 1.047 | 1.028 | 0.011  | 0.342 |
| 357 | pm12-pm28 | 1.024 | 1.049 | 0.97  | 1.016 | -0.011 | 0.366 |
| 358 | pm12-pm29 | 1.027 | 1.035 | 0.996 | 1.01  | 0      | 0.718 |
| 359 | pm12-pm30 | 1.077 | 1.052 | 0.992 | 1.04  | 0.019  | 0.341 |
| 360 | pm12-pm31 | 1.02  | 1.101 | 1.045 | 1.001 | -0.005 | 0.596 |
| 361 | pm12-pm32 | 1.01  | 1.058 | 0.982 | 1.096 | 0.005  | 0.659 |
| 362 | pm12-pm33 | 1.007 | 1.153 | 1.035 | 1.155 | -0.006 | 0.557 |
| 363 | pm12-pm34 | 0.987 | 1.032 | 0.927 | 1.061 | -0.019 | 0.356 |
| 364 | pm12-pm35 | 1.04  | 1.07  | 0.941 | 1.147 | 0.013  | 0.318 |
| 365 | pm12-pm36 | 1.021 | 1.031 | 0.986 | 1.004 | 0.001  | 0.674 |
| 366 | pm12-pm37 | 0.997 | 1.004 | 1.004 | 1.013 | -0.004 | 0.821 |
| 367 | pm13-pm14 | 0.831 | 0.816 | 0.834 | 0.842 | 0.073  | 0.063 |
| 368 | pm13-pm15 | 0.973 | 1.041 | 1.009 | 0.849 | -0.054 | 0.044 |
| 369 | pm13-pm16 | 1.047 | 0.947 | 1.067 | 0.877 | -0.031 | 0.288 |
| 370 | pm13-pm17 | 0.947 | 1.03  | 1.073 | 0.863 | -0.056 | 0.041 |
| 371 | pm13-pm18 | 0.873 | 0.913 | 0.922 | 0.848 | 0.021  | 0.229 |
| 372 | pm13-pm19 | 0.9   | 0.888 | 0.964 | 0.853 | 0.004  | 0.885 |
| 373 | pm13-pm20 | 0.888 | 0.902 | 0.906 | 0.851 | 0.013  | 0.327 |
| 374 | pm13-pm21 | 1.405 | 0.925 | 1.654 | 1.011 | -0.039 | 0.254 |
| 375 | pm13-pm22 | 0.875 | 0.853 | 0.882 | 0.816 | 0.009  | 0.458 |
| 376 | pm13-pm23 | 0.887 | 0.859 | 0.88  | 0.816 | 0.017  | 0.381 |
| 377 | pm13-pm24 | 0.888 | 0.889 | 0.903 | 0.876 | 0.026  | 0.257 |
| 378 | pm13-pm25 | 0.879 | 0.853 | 0.913 | 0.864 | 0.022  | 0.258 |
| 379 | pm13-pm26 | 0.885 | 0.872 | 0.904 | 0.83  | 0.017  | 0.345 |

|     |           |       |       |       |       |        |       |
|-----|-----------|-------|-------|-------|-------|--------|-------|
| 380 | pm13-pm27 | 0.907 | 0.89  | 0.906 | 0.857 | 0      | 0.859 |
| 381 | pm13-pm28 | 0.931 | 0.882 | 0.895 | 0.843 | 0.016  | 0.384 |
| 382 | pm13-pm29 | 0.839 | 0.89  | 0.903 | 0.864 | 0.011  | 0.361 |
| 383 | pm13-pm30 | 0.881 | 0.881 | 0.893 | 0.859 | 0.011  | 0.337 |
| 384 | pm13-pm31 | 0.899 | 0.932 | 0.962 | 0.879 | 0.025  | 0.232 |
| 385 | pm13-pm32 | 0.921 | 0.855 | 0.873 | 0.893 | 0.007  | 0.55  |
| 386 | pm13-pm33 | 0.935 | 0.923 | 0.9   | 0.927 | -0.019 | 0.368 |
| 387 | pm13-pm34 | 0.868 | 0.926 | 0.816 | 0.891 | 0.007  | 0.597 |
| 388 | pm13-pm35 | 0.881 | 0.888 | 0.853 | 0.948 | 0.01   | 0.523 |
| 389 | pm13-pm36 | 0.88  | 0.85  | 0.888 | 0.845 | 0.009  | 0.586 |
| 390 | pm13-pm37 | 0.902 | 0.859 | 0.878 | 0.832 | 0.013  | 0.369 |
| 391 | pm14-pm15 | 0.994 | 1.114 | 1.042 | 0.915 | -0.046 | 0.188 |
| 392 | pm14-pm16 | 1.044 | 1     | 1.035 | 0.922 | -0.056 | 0.02  |
| 393 | pm14-pm17 | 1.021 | 0.993 | 1.106 | 0.925 | -0.064 | 0.039 |
| 394 | pm14-pm18 | 0.912 | 0.921 | 0.908 | 0.878 | -0.003 | 0.733 |
| 395 | pm14-pm19 | 0.891 | 0.947 | 0.92  | 0.908 | -0.021 | 0.292 |
| 396 | pm14-pm20 | 0.937 | 0.908 | 0.938 | 0.884 | 0.002  | 0.872 |
| 397 | pm14-pm21 | 1.43  | 0.971 | 1.716 | 1.101 | -0.024 | 0.255 |
| 398 | pm14-pm22 | 0.919 | 0.911 | 0.951 | 0.856 | 0.022  | 0.273 |
| 399 | pm14-pm23 | 0.895 | 0.954 | 0.9   | 0.89  | 0.025  | 0.288 |
| 400 | pm14-pm24 | 0.938 | 0.88  | 0.923 | 0.878 | 0.001  | 0.798 |
| 401 | pm14-pm25 | 0.928 | 0.849 | 0.915 | 0.875 | -0.005 | 0.984 |
| 402 | pm14-pm26 | 0.918 | 0.932 | 0.912 | 0.903 | 0.02   | 0.345 |
| 403 | pm14-pm27 | 0.911 | 0.968 | 0.963 | 0.91  | 0.008  | 0.466 |
| 404 | pm14-pm28 | 0.927 | 0.837 | 0.899 | 0.889 | -0.024 | 0.295 |
| 405 | pm14-pm29 | 0.908 | 0.892 | 0.909 | 0.85  | -0.014 | 0.365 |
| 406 | pm14-pm30 | 0.925 | 0.879 | 0.903 | 0.89  | -0.009 | 0.577 |
| 407 | pm14-pm31 | 0.946 | 0.924 | 0.992 | 0.926 | 0.013  | 0.382 |
| 408 | pm14-pm32 | 0.905 | 0.945 | 0.958 | 0.943 | 0.019  | 0.322 |
| 409 | pm14-pm33 | 0.909 | 0.968 | 0.936 | 0.958 | -0.038 | 0.223 |

|     |           |       |       |       |       |        |       |
|-----|-----------|-------|-------|-------|-------|--------|-------|
| 410 | pm14-pm34 | 0.947 | 0.894 | 0.869 | 0.906 | -0.004 | 0.891 |
| 411 | pm14-pm35 | 0.902 | 0.885 | 0.923 | 0.952 | -0.008 | 0.582 |
| 412 | pm14-pm36 | 0.925 | 0.858 | 0.922 | 0.877 | -0.001 | 0.915 |
| 413 | pm14-pm37 | 0.944 | 0.876 | 0.905 | 0.869 | 0.003  | 0.657 |
| 414 | pm15-pm16 | 1.278 | 1.381 | 1.206 | 1.114 | -0.077 | 0.016 |
| 415 | pm15-pm17 | 1.219 | 1.426 | 1.287 | 1.075 | -0.088 | 0.013 |
| 416 | pm15-pm18 | 1.16  | 1.191 | 1.115 | 1.042 | -0.045 | 0.171 |
| 417 | pm15-pm19 | 1.118 | 1.262 | 1.186 | 1.079 | -0.041 | 0.167 |
| 418 | pm15-pm20 | 1.112 | 1.245 | 1.135 | 1.008 | -0.054 | 0.036 |
| 419 | pm15-pm21 | 1.694 | 1.307 | 2.104 | 1.292 | 0.006  | 0.434 |
| 420 | pm15-pm22 | 1.092 | 1.224 | 1.098 | 1.03  | -0.041 | 0.185 |
| 421 | pm15-pm23 | 1.065 | 1.256 | 1.146 | 1.006 | -0.031 | 0.213 |
| 422 | pm15-pm24 | 1.11  | 1.255 | 1.118 | 1.017 | -0.044 | 0.174 |
| 423 | pm15-pm25 | 1.134 | 1.24  | 1.128 | 1.056 | -0.021 | 0.288 |
| 424 | pm15-pm26 | 1.133 | 1.19  | 1.107 | 1.062 | -0.038 | 0.21  |
| 425 | pm15-pm27 | 1.148 | 1.298 | 1.126 | 1.011 | -0.049 | 0.159 |
| 426 | pm15-pm28 | 1.1   | 1.208 | 1.124 | 1.077 | -0.05  | 0.172 |
| 427 | pm15-pm29 | 1.101 | 1.178 | 1.077 | 1.057 | -0.065 | 0.035 |
| 428 | pm15-pm30 | 1.136 | 1.251 | 1.157 | 1.081 | -0.017 | 0.351 |
| 429 | pm15-pm31 | 1.138 | 1.302 | 1.155 | 1.048 | -0.038 | 0.224 |
| 430 | pm15-pm32 | 1.097 | 1.288 | 1.095 | 1.091 | -0.041 | 0.174 |
| 431 | pm15-pm33 | 1.089 | 1.389 | 1.136 | 1.152 | -0.054 | 0.032 |
| 432 | pm15-pm34 | 1.144 | 1.255 | 1.038 | 1.076 | -0.044 | 0.199 |
| 433 | pm15-pm35 | 1.112 | 1.222 | 1.051 | 1.154 | -0.053 | 0.042 |
| 434 | pm15-pm36 | 1.094 | 1.212 | 1.133 | 1.027 | -0.045 | 0.176 |
| 435 | pm15-pm37 | 1.103 | 1.197 | 1.118 | 1.034 | -0.047 | 0.176 |
| 436 | pm16-pm17 | 1.502 | 1.518 | 1.551 | 1.361 | 0.149  | 0.006 |
| 437 | pm16-pm18 | 1.161 | 1.211 | 1.169 | 1.051 | -0.018 | 0.347 |
| 438 | pm16-pm19 | 1.162 | 1.258 | 1.183 | 1.112 | -0.017 | 0.371 |
| 439 | pm16-pm20 | 1.169 | 1.173 | 1.16  | 1.067 | -0.031 | 0.253 |

|     |           |       |       |       |       |        |       |
|-----|-----------|-------|-------|-------|-------|--------|-------|
| 440 | pm16-pm21 | 1.77  | 1.241 | 2.145 | 1.295 | 0.026  | 0.276 |
| 441 | pm16-pm22 | 1.15  | 1.237 | 1.138 | 1.021 | -0.01  | 0.457 |
| 442 | pm16-pm23 | 1.108 | 1.228 | 1.143 | 1.054 | -0.01  | 0.398 |
| 443 | pm16-pm24 | 1.121 | 1.216 | 1.159 | 1.079 | -0.019 | 0.359 |
| 444 | pm16-pm25 | 1.169 | 1.125 | 1.132 | 1.039 | -0.039 | 0.291 |
| 445 | pm16-pm26 | 1.163 | 1.162 | 1.141 | 1.076 | -0.019 | 0.306 |
| 446 | pm16-pm27 | 1.145 | 1.165 | 1.189 | 1.05  | -0.052 | 0.038 |
| 447 | pm16-pm28 | 1.168 | 1.184 | 1.156 | 1.122 | -0.014 | 0.353 |
| 448 | pm16-pm29 | 1.178 | 1.183 | 1.176 | 1.087 | -0.007 | 0.537 |
| 449 | pm16-pm30 | 1.158 | 1.171 | 1.138 | 1.044 | -0.039 | 0.236 |
| 450 | pm16-pm31 | 1.197 | 1.285 | 1.166 | 1.05  | -0.018 | 0.392 |
| 451 | pm16-pm32 | 1.147 | 1.146 | 1.169 | 1.155 | -0.023 | 0.23  |
| 452 | pm16-pm33 | 1.22  | 1.283 | 1.174 | 1.228 | -0.013 | 0.365 |
| 453 | pm16-pm34 | 1.172 | 1.249 | 1.129 | 1.135 | 0.004  | 0.89  |
| 454 | pm16-pm35 | 1.162 | 1.244 | 1.119 | 1.224 | 0.005  | 0.488 |
| 455 | pm16-pm36 | 1.141 | 1.145 | 1.159 | 1.092 | -0.022 | 0.241 |
| 456 | pm16-pm37 | 1.169 | 1.16  | 1.138 | 1.055 | -0.024 | 0.264 |
| 457 | pm17-pm18 | 1.204 | 1.153 | 1.199 | 1.034 | -0.038 | 0.253 |
| 458 | pm17-pm19 | 1.139 | 1.231 | 1.244 | 1.115 | -0.032 | 0.228 |
| 459 | pm17-pm20 | 1.151 | 1.157 | 1.205 | 1.067 | -0.046 | 0.197 |
| 460 | pm17-pm21 | 1.584 | 1.351 | 2.236 | 1.265 | 0.004  | 0.96  |
| 461 | pm17-pm22 | 1.177 | 1.188 | 1.187 | 1.008 | -0.025 | 0.259 |
| 462 | pm17-pm23 | 1.149 | 1.245 | 1.194 | 0.988 | -0.018 | 0.309 |
| 463 | pm17-pm24 | 1.152 | 1.177 | 1.188 | 1.004 | -0.051 | 0.026 |
| 464 | pm17-pm25 | 1.151 | 1.151 | 1.185 | 1.027 | -0.045 | 0.158 |
| 465 | pm17-pm26 | 1.129 | 1.184 | 1.179 | 1.035 | -0.041 | 0.184 |
| 466 | pm17-pm27 | 1.141 | 1.215 | 1.252 | 1.046 | -0.044 | 0.174 |
| 467 | pm17-pm28 | 1.181 | 1.181 | 1.174 | 1.055 | -0.042 | 0.171 |
| 468 | pm17-pm29 | 1.164 | 1.172 | 1.249 | 1.021 | -0.03  | 0.291 |
| 469 | pm17-pm30 | 1.149 | 1.167 | 1.206 | 1.047 | -0.043 | 0.17  |

|     |           |       |       |       |       |        |       |
|-----|-----------|-------|-------|-------|-------|--------|-------|
| 470 | pm17-pm31 | 1.166 | 1.262 | 1.229 | 1.076 | -0.028 | 0.298 |
| 471 | pm17-pm32 | 1.124 | 1.157 | 1.198 | 1.131 | -0.043 | 0.164 |
| 472 | pm17-pm33 | 1.146 | 1.296 | 1.215 | 1.2   | -0.044 | 0.169 |
| 473 | pm17-pm34 | 1.145 | 1.206 | 1.142 | 1.091 | -0.039 | 0.252 |
| 474 | pm17-pm35 | 1.158 | 1.193 | 1.133 | 1.168 | -0.037 | 0.247 |
| 475 | pm17-pm36 | 1.131 | 1.174 | 1.217 | 1.022 | -0.038 | 0.228 |
| 476 | pm17-pm37 | 1.159 | 1.12  | 1.221 | 1.079 | -0.028 | 0.282 |
| 477 | pm18-pm19 | 1.004 | 1.012 | 1.016 | 1.06  | -0.024 | 0.297 |
| 478 | pm18-pm20 | 1.05  | 1.015 | 0.991 | 1.025 | -0.004 | 0.705 |
| 479 | pm18-pm21 | 1.534 | 1.128 | 1.808 | 1.251 | -0.008 | 0.473 |
| 480 | pm18-pm22 | 1.043 | 1.038 | 0.991 | 1.024 | 0.026  | 0.249 |
| 481 | pm18-pm23 | 1.014 | 1.07  | 0.978 | 1.043 | 0.032  | 0.296 |
| 482 | pm18-pm24 | 1.024 | 1.04  | 0.995 | 1.028 | 0.007  | 0.564 |
| 483 | pm18-pm25 | 1.039 | 1.007 | 1.006 | 1.02  | 0.012  | 0.315 |
| 484 | pm18-pm26 | 1.013 | 0.996 | 1.007 | 1.044 | 0.009  | 0.406 |
| 485 | pm18-pm27 | 1.024 | 1.082 | 1.001 | 1.009 | -0.011 | 0.381 |
| 486 | pm18-pm28 | 1.045 | 1.048 | 0.98  | 1.022 | 0.001  | 0.632 |
| 487 | pm18-pm29 | 1.052 | 1.036 | 0.993 | 1.022 | 0.012  | 0.342 |
| 488 | pm18-pm30 | 1.051 | 1.043 | 1.008 | 1.042 | 0.017  | 0.385 |
| 489 | pm18-pm31 | 1.029 | 1.119 | 1.031 | 1.044 | 0.012  | 0.333 |
| 490 | pm18-pm32 | 1.042 | 1.071 | 0.985 | 1.091 | 0.018  | 0.352 |
| 491 | pm18-pm33 | 1.036 | 1.137 | 0.992 | 1.192 | -0.002 | 0.709 |
| 492 | pm18-pm34 | 1.029 | 1.007 | 0.894 | 1.127 | -0.004 | 0.87  |
| 493 | pm18-pm35 | 1.066 | 1.056 | 0.939 | 1.166 | 0.023  | 0.208 |
| 494 | pm18-pm36 | 1.008 | 1.015 | 0.982 | 1.022 | 0      | 0.79  |
| 495 | pm18-pm37 | 1.033 | 1.007 | 0.992 | 1.024 | 0.008  | 0.42  |
| 496 | pm19-pm20 | 0.979 | 1.079 | 1.013 | 1.029 | -0.028 | 0.221 |
| 497 | pm19-pm21 | 1.544 | 1.143 | 1.9   | 1.237 | -0.012 | 0.389 |
| 498 | pm19-pm22 | 1.009 | 1.019 | 1.046 | 1.047 | 0.003  | 0.902 |
| 499 | pm19-pm23 | 1.001 | 1.052 | 0.997 | 1.05  | 0.001  | 0.937 |



|     |           |       |       |       |       |        |       |
|-----|-----------|-------|-------|-------|-------|--------|-------|
| 500 | pm19-pm24 | 0.993 | 1.046 | 1.059 | 1.012 | -0.016 | 0.379 |
| 501 | pm19-pm25 | 0.987 | 1.068 | 1.014 | 1.03  | -0.011 | 0.307 |
| 502 | pm19-pm26 | 0.986 | 1.083 | 1.016 | 1.047 | -0.003 | 0.947 |
| 503 | pm19-pm27 | 0.991 | 1.119 | 1.055 | 1.082 | -0.008 | 0.508 |
| 504 | pm19-pm28 | 1.019 | 1.079 | 1.047 | 1.092 | 0.007  | 0.549 |
| 505 | pm19-pm29 | 0.986 | 1.082 | 1.019 | 1.051 | -0.009 | 0.547 |
| 506 | pm19-pm30 | 0.989 | 1.045 | 1.001 | 1.07  | -0.022 | 0.246 |
| 507 | pm19-pm31 | 1.033 | 1.132 | 1.059 | 1.044 | -0.006 | 0.508 |
| 508 | pm19-pm32 | 1.003 | 1.044 | 1.041 | 1.116 | -0.007 | 0.538 |
| 509 | pm19-pm33 | 0.983 | 1.179 | 1.049 | 1.171 | -0.025 | 0.293 |
| 510 | pm19-pm34 | 0.992 | 1.051 | 0.935 | 1.09  | -0.031 | 0.286 |
| 511 | pm19-pm35 | 1.036 | 1.116 | 0.968 | 1.124 | -0.001 | 0.668 |
| 512 | pm19-pm36 | 1.013 | 1.023 | 1.022 | 1.062 | -0.006 | 0.482 |
| 513 | pm19-pm37 | 1.002 | 1.081 | 1.024 | 0.999 | -0.009 | 0.545 |
| 514 | pm20-pm21 | 1.564 | 1.154 | 1.846 | 1.199 | -0.004 | 0.731 |
| 515 | pm20-pm22 | 1.032 | 1.101 | 1.019 | 1.006 | 0.035  | 0.207 |
| 516 | pm20-pm23 | 1.029 | 1.09  | 0.988 | 1.035 | 0.035  | 0.276 |
| 517 | pm20-pm24 | 1.006 | 1.055 | 0.991 | 1.019 | -0.003 | 0.952 |
| 518 | pm20-pm25 | 1.01  | 1.051 | 0.995 | 1.016 | 0.006  | 0.503 |
| 519 | pm20-pm26 | 1.03  | 1.075 | 0.98  | 0.998 | 0.008  | 0.559 |
| 520 | pm20-pm27 | 1.021 | 1.042 | 1.037 | 1.019 | -0.017 | 0.39  |
| 521 | pm20-pm28 | 1.045 | 1.072 | 1.024 | 1.021 | 0.012  | 0.314 |
| 522 | pm20-pm29 | 0.978 | 1.015 | 0.975 | 1.016 | -0.024 | 0.222 |
| 523 | pm20-pm30 | 1.041 | 1.069 | 0.978 | 1.055 | 0.011  | 0.343 |
| 524 | pm20-pm31 | 1.016 | 1.126 | 1.028 | 1.039 | 0.002  | 0.614 |
| 525 | pm20-pm32 | 1.033 | 1.016 | 1.012 | 1.085 | 0.001  | 0.795 |
| 526 | pm20-pm33 | 1.046 | 1.102 | 1.025 | 1.15  | -0.017 | 0.37  |
| 527 | pm20-pm34 | 1.004 | 1.072 | 0.934 | 1.084 | -0.001 | 0.68  |
| 528 | pm20-pm35 | 1.019 | 1.048 | 0.944 | 1.117 | -0.008 | 0.488 |
| 529 | pm20-pm36 | 1.027 | 0.986 | 0.978 | 1.025 | -0.009 | 0.531 |

|     |           |       |       |       |       |        |       |
|-----|-----------|-------|-------|-------|-------|--------|-------|
| 530 | pm20-pm37 | 1.023 | 1.044 | 0.996 | 1.021 | 0.009  | 0.581 |
| 531 | pm21-pm22 | 1.49  | 1.126 | 1.819 | 1.182 | -0.014 | 0.393 |
| 532 | pm21-pm23 | 1.568 | 1.148 | 1.849 | 1.183 | 0.022  | 0.251 |
| 533 | pm21-pm24 | 1.551 | 1.147 | 1.821 | 1.205 | -0.004 | 0.665 |
| 534 | pm21-pm25 | 1.559 | 1.088 | 1.819 | 1.212 | -0.007 | 0.511 |
| 535 | pm21-pm26 | 1.506 | 1.125 | 1.825 | 1.22  | -0.008 | 0.436 |
| 536 | pm21-pm27 | 1.525 | 1.199 | 1.835 | 1.23  | -0.013 | 0.331 |
| 537 | pm21-pm28 | 1.549 | 1.141 | 1.837 | 1.234 | -0.003 | 0.841 |
| 538 | pm21-pm29 | 1.557 | 1.094 | 1.802 | 1.184 | -0.025 | 0.295 |
| 539 | pm21-pm30 | 1.514 | 1.092 | 1.834 | 1.187 | -0.032 | 0.269 |
| 540 | pm21-pm31 | 1.532 | 1.164 | 1.817 | 1.23  | -0.029 | 0.242 |
| 541 | pm21-pm32 | 1.501 | 1.146 | 1.783 | 1.249 | -0.03  | 0.226 |
| 542 | pm21-pm33 | 1.542 | 1.201 | 1.907 | 1.369 | -0.007 | 0.599 |
| 543 | pm21-pm34 | 1.566 | 1.154 | 1.765 | 1.238 | -0.008 | 0.572 |
| 544 | pm21-pm35 | 1.524 | 1.185 | 1.779 | 1.363 | 0.009  | 0.578 |
| 545 | pm21-pm36 | 1.505 | 1.123 | 1.832 | 1.195 | -0.014 | 0.347 |
| 546 | pm21-pm37 | 1.497 | 1.139 | 1.851 | 1.2   | -0.005 | 0.835 |
| 547 | pm22-pm23 | 0.971 | 1.05  | 0.999 | 1.004 | 0.032  | 0.284 |
| 548 | pm22-pm24 | 0.991 | 1.073 | 0.993 | 0.971 | 0.013  | 0.394 |
| 549 | pm22-pm25 | 0.987 | 1.036 | 1.017 | 1.006 | 0.025  | 0.291 |
| 550 | pm22-pm26 | 1.003 | 1.018 | 0.975 | 0.992 | 0.011  | 0.367 |
| 551 | pm22-pm27 | 1.027 | 1.082 | 1.02  | 1.031 | 0.02   | 0.344 |
| 552 | pm22-pm28 | 0.996 | 1.056 | 1.032 | 1.006 | 0.02   | 0.244 |
| 553 | pm22-pm29 | 0.989 | 1.1   | 1.002 | 0.999 | 0.028  | 0.247 |
| 554 | pm22-pm30 | 0.996 | 1.105 | 0.99  | 0.976 | 0.018  | 0.327 |
| 555 | pm22-pm31 | 1.035 | 1.104 | 1.025 | 0.983 | 0.012  | 0.363 |
| 556 | pm22-pm32 | 0.994 | 1.072 | 0.984 | 1.056 | 0.018  | 0.36  |
| 557 | pm22-pm33 | 1.014 | 1.154 | 0.985 | 1.161 | 0.008  | 0.415 |
| 558 | pm22-pm34 | 0.975 | 1.051 | 0.925 | 1.054 | 0.003  | 0.993 |
| 559 | pm22-pm35 | 0.989 | 1.081 | 0.947 | 1.114 | 0.02   | 0.399 |

|     |           |       |       |       |       |        |       |
|-----|-----------|-------|-------|-------|-------|--------|-------|
| 560 | pm22-pm36 | 1.002 | 1.005 | 0.989 | 0.972 | 0.005  | 0.51  |
| 561 | pm22-pm37 | 0.98  | 1.05  | 0.976 | 1.019 | 0.021  | 0.218 |
| 562 | pm23-pm24 | 1.025 | 1.027 | 0.991 | 1.009 | 0.022  | 0.227 |
| 563 | pm23-pm25 | 1.001 | 1.049 | 0.99  | 1.013 | 0.031  | 0.249 |
| 564 | pm23-pm26 | 1.003 | 1.05  | 1.005 | 0.993 | 0.03   | 0.235 |
| 565 | pm23-pm27 | 1.016 | 1.163 | 1.036 | 0.974 | 0.031  | 0.25  |
| 566 | pm23-pm28 | 1.022 | 1.087 | 1.003 | 1.017 | 0.033  | 0.225 |
| 567 | pm23-pm29 | 1.003 | 1.039 | 1.004 | 0.987 | 0.018  | 0.332 |
| 568 | pm23-pm30 | 1.002 | 1.052 | 0.957 | 1.011 | 0.01   | 0.32  |
| 569 | pm23-pm31 | 1.033 | 1.166 | 1.023 | 1.014 | 0.039  | 0.267 |
| 570 | pm23-pm32 | 1.002 | 1.074 | 0.973 | 1.07  | 0.024  | 0.254 |
| 571 | pm23-pm33 | 1.002 | 1.161 | 0.98  | 1.138 | 0.003  | 0.812 |
| 572 | pm23-pm34 | 0.95  | 1.096 | 0.959 | 1.038 | 0.016  | 0.326 |
| 573 | pm23-pm35 | 1.034 | 1.074 | 0.9   | 1.094 | 0.016  | 0.354 |
| 574 | pm23-pm36 | 0.993 | 1.077 | 0.986 | 0.999 | 0.03   | 0.297 |
| 575 | pm23-pm37 | 0.998 | 1.049 | 1.024 | 0.997 | 0.035  | 0.294 |
| 576 | pm24-pm25 | 1.002 | 1.064 | 1.012 | 0.99  | 0.015  | 0.39  |
| 577 | pm24-pm26 | 1.01  | 1.043 | 1.016 | 1.005 | 0.016  | 0.305 |
| 578 | pm24-pm27 | 0.976 | 1.115 | 1.053 | 0.994 | -0.002 | 0.713 |
| 579 | pm24-pm28 | 1.006 | 1.025 | 0.993 | 1.033 | -0.004 | 0.948 |
| 580 | pm24-pm29 | 0.981 | 1.083 | 1.005 | 0.983 | 0.003  | 0.98  |
| 581 | pm24-pm30 | 1.024 | 1.04  | 1.014 | 1.002 | 0.005  | 0.588 |
| 582 | pm24-pm31 | 1.019 | 1.149 | 1.019 | 1.025 | 0.013  | 0.348 |
| 583 | pm24-pm32 | 0.999 | 1.086 | 1.002 | 1.093 | 0.02   | 0.399 |
| 584 | pm24-pm33 | 1.014 | 1.148 | 1.003 | 1.146 | -0.009 | 0.52  |
| 585 | pm24-pm34 | 0.992 | 1.06  | 0.906 | 1.091 | -0.002 | 0.676 |
| 586 | pm24-pm35 | 1.022 | 1.105 | 0.909 | 1.096 | 0.004  | 0.624 |
| 587 | pm24-pm36 | 0.993 | 1.021 | 0.991 | 1.002 | -0.001 | 0.732 |
| 588 | pm24-pm37 | 0.999 | 1.015 | 0.976 | 1.008 | -0.002 | 0.939 |
| 589 | pm25-pm26 | 0.993 | 1.001 | 1.02  | 1.007 | 0.011  | 0.317 |

|     |           |       |       |       |       |        |       |
|-----|-----------|-------|-------|-------|-------|--------|-------|
| 590 | pm25-pm27 | 0.997 | 1.037 | 1.018 | 0.986 | -0.019 | 0.36  |
| 591 | pm25-pm28 | 1.016 | 1.042 | 1.007 | 1.027 | 0.013  | 0.399 |
| 592 | pm25-pm29 | 1.009 | 1.048 | 0.996 | 0.991 | 0.009  | 0.488 |
| 593 | pm25-pm30 | 1.039 | 1.064 | 0.998 | 1.005 | 0.02   | 0.214 |
| 594 | pm25-pm31 | 1.04  | 1.11  | 1.003 | 1.015 | 0.01   | 0.519 |
| 595 | pm25-pm32 | 0.997 | 1.04  | 0.99  | 1.082 | 0.01   | 0.379 |
| 596 | pm25-pm33 | 0.997 | 1.126 | 1.007 | 1.119 | -0.017 | 0.356 |
| 597 | pm25-pm34 | 0.992 | 1.034 | 0.921 | 1.054 | -0.006 | 0.457 |
| 598 | pm25-pm35 | 1.032 | 1.097 | 0.936 | 1.151 | 0.033  | 0.278 |
| 599 | pm25-pm36 | 1.005 | 1.023 | 0.991 | 0.987 | 0.006  | 0.469 |
| 600 | pm25-pm37 | 1.018 | 0.982 | 0.998 | 0.988 | 0.002  | 0.663 |
| 601 | pm26-pm27 | 0.998 | 1.031 | 1.04  | 0.99  | -0.013 | 0.387 |
| 602 | pm26-pm28 | 0.996 | 0.965 | 1.01  | 1.04  | -0.008 | 0.401 |
| 603 | pm26-pm29 | 0.991 | 1.075 | 1.015 | 1.008 | 0.02   | 0.304 |
| 604 | pm26-pm30 | 1.039 | 0.999 | 1.004 | 1.021 | 0.009  | 0.418 |
| 605 | pm26-pm31 | 1.046 | 1.099 | 1.031 | 0.994 | 0.01   | 0.467 |
| 606 | pm26-pm32 | 1.006 | 1.005 | 0.982 | 1.09  | 0.003  | 0.761 |
| 607 | pm26-pm33 | 1.048 | 1.125 | 0.988 | 1.148 | -0.002 | 0.774 |
| 608 | pm26-pm34 | 1.01  | 1.036 | 0.922 | 1.065 | 0.002  | 0.774 |
| 609 | pm26-pm35 | 1.013 | 1.005 | 0.929 | 1.124 | -0.004 | 0.761 |
| 610 | pm26-pm36 | 0.978 | 1.006 | 0.988 | 1.008 | 0      | 0.882 |
| 611 | pm26-pm37 | 1     | 1.001 | 1.015 | 0.991 | 0.008  | 0.495 |
| 612 | pm27-pm28 | 1.03  | 1.081 | 1.034 | 0.996 | -0.01  | 0.55  |
| 613 | pm27-pm29 | 0.99  | 1.111 | 1.008 | 1.031 | -0.001 | 0.628 |
| 614 | pm27-pm30 | 1.003 | 1.061 | 1.013 | 1.017 | -0.017 | 0.313 |
| 615 | pm27-pm31 | 1.056 | 1.166 | 1.084 | 1.03  | 0.018  | 0.389 |
| 616 | pm27-pm32 | 1.01  | 1.118 | 1.015 | 1.096 | 0.009  | 0.497 |
| 617 | pm27-pm33 | 1.023 | 1.162 | 1.043 | 1.185 | -0.01  | 0.48  |
| 618 | pm27-pm34 | 1.006 | 1.102 | 0.974 | 1.068 | -0.003 | 0.902 |
| 619 | pm27-pm35 | 1.031 | 1.094 | 0.989 | 1.108 | 0      | 0.616 |

|     |           |       |       |       |       |        |       |
|-----|-----------|-------|-------|-------|-------|--------|-------|
| 620 | pm27-pm36 | 0.993 | 1.034 | 1.046 | 1.012 | -0.008 | 0.575 |
| 621 | pm27-pm37 | 0.99  | 1.047 | 1.039 | 1.017 | -0.005 | 0.652 |
| 622 | pm28-pm29 | 1.025 | 1.034 | 1.005 | 1.05  | 0.01   | 0.568 |
| 623 | pm28-pm30 | 1.019 | 1.057 | 0.997 | 1.062 | 0.011  | 0.397 |
| 624 | pm28-pm31 | 1.054 | 1.112 | 1.028 | 1.031 | 0.007  | 0.513 |
| 625 | pm28-pm32 | 1.004 | 1.061 | 0.989 | 1.109 | 0.008  | 0.498 |
| 626 | pm28-pm33 | 1.02  | 1.174 | 0.96  | 1.178 | -0.013 | 0.395 |
| 627 | pm28-pm34 | 1     | 1.042 | 0.916 | 1.043 | -0.022 | 0.285 |
| 628 | pm28-pm35 | 1.023 | 1.072 | 0.959 | 1.138 | 0.01   | 0.358 |
| 629 | pm28-pm36 | 1.022 | 1.044 | 0.997 | 1.016 | 0.008  | 0.482 |
| 630 | pm28-pm37 | 1.025 | 1.025 | 0.99  | 1.036 | 0.009  | 0.597 |
| 631 | pm29-pm30 | 1.006 | 1.033 | 0.99  | 1.027 | -0.001 | 0.899 |
| 632 | pm29-pm31 | 1.034 | 1.153 | 1.041 | 1.026 | 0.023  | 0.234 |
| 633 | pm29-pm32 | 1.012 | 1.02  | 0.985 | 1.066 | -0.004 | 0.773 |
| 634 | pm29-pm33 | 1.012 | 1.154 | 1.014 | 1.188 | 0.005  | 0.899 |
| 635 | pm29-pm34 | 0.971 | 1.103 | 0.907 | 1.073 | -0.001 | 0.843 |
| 636 | pm29-pm35 | 1.028 | 1.057 | 0.922 | 1.144 | 0.008  | 0.505 |
| 637 | pm29-pm36 | 1.01  | 1.028 | 1.011 | 0.984 | 0.005  | 0.444 |
| 638 | pm29-pm37 | 1.005 | 1.053 | 0.989 | 0.988 | 0.007  | 0.507 |
| 639 | pm30-pm31 | 1.068 | 1.107 | 1.037 | 1.005 | 0.01   | 0.433 |
| 640 | pm30-pm32 | 1.03  | 1.068 | 0.986 | 1.077 | 0.011  | 0.335 |
| 641 | pm30-pm33 | 1.063 | 1.134 | 1.009 | 1.167 | 0.002  | 0.82  |
| 642 | pm30-pm34 | 0.977 | 1.021 | 0.91  | 1.078 | -0.022 | 0.289 |
| 643 | pm30-pm35 | 1.041 | 1.045 | 0.947 | 1.181 | 0.02   | 0.325 |
| 644 | pm30-pm36 | 1.039 | 1.033 | 1.027 | 0.993 | 0.015  | 0.385 |
| 645 | pm30-pm37 | 1.006 | 1.004 | 1.02  | 1.031 | 0.009  | 0.426 |
| 646 | pm31-pm32 | 1.013 | 1.175 | 0.999 | 1.079 | 0.012  | 0.374 |
| 647 | pm31-pm33 | 1.041 | 1.189 | 1.03  | 1.158 | -0.013 | 0.388 |
| 648 | pm31-pm34 | 1.032 | 1.162 | 0.979 | 1.078 | 0.018  | 0.358 |
| 649 | pm31-pm35 | 1.039 | 1.167 | 0.956 | 1.166 | 0.023  | 0.207 |

|     |           |       |       |       |       |        |       |
|-----|-----------|-------|-------|-------|-------|--------|-------|
| 650 | pm31-pm36 | 1.033 | 1.075 | 1.02  | 1.03  | 0.006  | 0.542 |
| 651 | pm31-pm37 | 1.038 | 1.132 | 1.031 | 1.008 | 0.02   | 0.28  |
| 652 | pm32-pm33 | 1.051 | 1.151 | 0.981 | 1.225 | 0      | 0.875 |
| 653 | pm32-pm34 | 1.006 | 1.082 | 0.931 | 1.14  | 0.011  | 0.302 |
| 654 | pm32-pm35 | 1.061 | 1.119 | 0.933 | 1.186 | 0.031  | 0.241 |
| 655 | pm32-pm36 | 0.996 | 1.044 | 0.989 | 1.064 | 0.006  | 0.562 |
| 656 | pm32-pm37 | 0.986 | 1.056 | 0.995 | 1.08  | 0.012  | 0.375 |
| 657 | pm33-pm34 | 1.047 | 1.114 | 0.959 | 1.241 | -0.001 | 0.614 |
| 658 | pm33-pm35 | 1.015 | 1.169 | 0.904 | 1.268 | -0.017 | 0.375 |
| 659 | pm33-pm36 | 0.973 | 1.115 | 1     | 1.171 | -0.015 | 0.35  |
| 660 | pm33-pm37 | 1.012 | 1.156 | 0.973 | 1.166 | -0.002 | 0.905 |
| 661 | pm34-pm35 | 1.004 | 1.028 | 0.94  | 1.146 | -0.004 | 0.982 |
| 662 | pm34-pm36 | 0.984 | 1.031 | 0.951 | 1.067 | 0.001  | 0.954 |
| 663 | pm34-pm37 | 1.016 | 1.051 | 0.938 | 1.031 | 0.003  | 0.915 |
| 664 | pm35-pm36 | 1.014 | 1.099 | 0.934 | 1.081 | 0.01   | 0.489 |
| 665 | pm35-pm37 | 1.031 | 1.052 | 0.901 | 1.133 | 0.008  | 0.536 |
| 666 | pm36-pm37 | 0.987 | 1     | 0.999 | 1.004 | 0.002  | 0.797 |

3c) Result of two-distribution perturbation analysis for hypertrophy when each response function was separately applied (100 million parameter sets)

| No. | Pair of perturbed parameter distributions | Lin   | Hill  | Sat   | Acc   | Synergistic effect | p-value |
|-----|-------------------------------------------|-------|-------|-------|-------|--------------------|---------|
| 1   | pm1-pm2                                   | 1.01  | 1.01  | 1.003 | 0.981 | -0.012             | 0.334   |
| 2   | pm1-pm3                                   | 1.036 | 1.044 | 0.984 | 1.019 | -0.004             | 0.895   |
| 3   | pm1-pm4                                   | 0.997 | 1.082 | 1.006 | 1.01  | -0.01              | 0.342   |
| 4   | pm1-pm5                                   | 1.009 | 1.025 | 1.028 | 0.985 | -0.004             | 0.883   |
| 5   | pm1-pm6                                   | 1.001 | 1.001 | 0.998 | 1.009 | -0.008             | 0.484   |

|    |          |       |       |       |       |        |       |
|----|----------|-------|-------|-------|-------|--------|-------|
| 6  | pml-pm7  | 2.814 | 2.048 | 2.691 | 2.244 | -0.111 | 0.006 |
| 7  | pml-pm8  | 1.053 | 1.024 | 1.025 | 1.073 | 0.012  | 0.328 |
| 8  | pml-pm9  | 1.071 | 1.068 | 1.013 | 1.054 | -0.001 | 0.963 |
| 9  | pml-pm10 | 1.456 | 1.542 | 1.267 | 1.452 | -0.042 | 0.186 |
| 10 | pml-pm11 | 1.014 | 0.98  | 0.99  | 0.997 | -0.015 | 0.389 |
| 11 | pml-pm12 | 1.005 | 1.061 | 0.985 | 1.016 | -0.008 | 0.405 |
| 12 | pml-pm13 | 0.924 | 0.906 | 0.893 | 0.836 | 0.018  | 0.343 |
| 13 | pml-pm14 | 0.942 | 0.908 | 0.966 | 0.883 | 0.012  | 0.35  |
| 14 | pml-pm15 | 1.083 | 1.225 | 1.121 | 0.987 | -0.073 | 0.012 |
| 15 | pml-pm16 | 1.202 | 1.205 | 1.187 | 1.039 | -0.013 | 0.336 |
| 16 | pml-pm17 | 1.189 | 1.214 | 1.183 | 1.063 | -0.027 | 0.245 |
| 17 | pml-pm18 | 1.044 | 1.003 | 1.002 | 1.002 | -0.01  | 0.306 |
| 18 | pml-pm19 | 0.989 | 1.077 | 1.048 | 1.022 | -0.018 | 0.341 |
| 19 | pml-pm20 | 1.015 | 1.074 | 1.011 | 1.024 | 0.002  | 0.701 |
| 20 | pml-pm21 | 1.532 | 1.1   | 1.834 | 1.229 | -0.019 | 0.388 |
| 21 | pml-pm22 | 1.016 | 1.041 | 1.031 | 0.955 | 0.008  | 0.522 |
| 22 | pml-pm23 | 1.012 | 1.047 | 1.038 | 0.978 | 0.019  | 0.306 |
| 23 | pml-pm24 | 1.021 | 1.068 | 0.995 | 0.99  | 0      | 0.644 |
| 24 | pml-pm25 | 1.008 | 1.022 | 1.003 | 1.012 | 0      | 0.782 |
| 25 | pml-pm26 | 0.988 | 1.028 | 0.987 | 1.01  | -0.007 | 0.592 |
| 26 | pml-pm27 | 1.008 | 1.056 | 1.038 | 0.997 | -0.02  | 0.229 |
| 27 | pml-pm28 | 1.028 | 1.042 | 1.035 | 1.02  | 0.004  | 0.824 |
| 28 | pml-pm29 | 1.035 | 1.059 | 1.003 | 1.007 | 0.007  | 0.525 |
| 29 | pml-pm30 | 1.062 | 1.01  | 1.017 | 0.994 | -0.002 | 0.934 |
| 30 | pml-pm31 | 1.02  | 1.103 | 1.062 | 0.995 | -0.004 | 0.634 |
| 31 | pml-pm32 | 1.027 | 1.04  | 1.029 | 1.055 | 0.004  | 0.975 |
| 32 | pml-pm33 | 1.02  | 1.144 | 1     | 1.152 | -0.016 | 0.394 |
| 33 | pml-pm34 | 0.977 | 1.058 | 0.961 | 1.097 | 0      | 0.87  |
| 34 | pml-pm35 | 1.014 | 1.072 | 0.972 | 1.083 | -0.003 | 0.603 |
| 35 | pml-pm36 | 1.014 | 1.02  | 1.022 | 0.979 | -0.003 | 0.868 |

|    |          |       |       |       |       |        |       |
|----|----------|-------|-------|-------|-------|--------|-------|
| 36 | pm1-pm37 | 1.014 | 1.025 | 1.021 | 0.989 | 0.002  | 0.845 |
| 37 | pm2-pm3  | 0.983 | 0.972 | 0.997 | 1.036 | -0.014 | 0.304 |
| 38 | pm2-pm4  | 0.963 | 1.077 | 1.01  | 1.023 | -0.002 | 0.61  |
| 39 | pm2-pm5  | 1.018 | 0.978 | 1.024 | 1.019 | 0.008  | 0.545 |
| 40 | pm2-pm6  | 1.025 | 1.004 | 0.987 | 0.995 | 0.006  | 0.566 |
| 41 | pm2-pm7  | 2.865 | 1.992 | 2.614 | 2.238 | -0.119 | 0.008 |
| 42 | pm2-pm8  | 0.997 | 0.991 | 0.998 | 1.031 | -0.014 | 0.336 |
| 43 | pm2-pm9  | 1.035 | 1.082 | 1.02  | 1.047 | 0.008  | 0.504 |
| 44 | pm2-pm10 | 1.432 | 1.495 | 1.296 | 1.495 | -0.028 | 0.294 |
| 45 | pm2-pm11 | 0.982 | 0.994 | 0.976 | 1.007 | -0.006 | 0.552 |
| 46 | pm2-pm12 | 0.986 | 1.011 | 0.982 | 0.972 | -0.024 | 0.293 |
| 47 | pm2-pm13 | 0.881 | 0.834 | 0.905 | 0.871 | 0.015  | 0.396 |
| 48 | pm2-pm14 | 0.879 | 0.86  | 0.933 | 0.862 | -0.015 | 0.315 |
| 49 | pm2-pm15 | 1.07  | 1.193 | 1.114 | 1.032 | -0.061 | 0.026 |
| 50 | pm2-pm16 | 1.14  | 1.151 | 1.174 | 1.053 | -0.028 | 0.203 |
| 51 | pm2-pm17 | 1.148 | 1.171 | 1.19  | 1.032 | -0.04  | 0.158 |
| 52 | pm2-pm18 | 1.025 | 1.015 | 1.015 | 1.008 | 0.007  | 0.496 |
| 53 | pm2-pm19 | 0.981 | 1.053 | 1.01  | 1.026 | -0.021 | 0.219 |
| 54 | pm2-pm20 | 1.023 | 1.027 | 1.006 | 1.027 | 0.006  | 0.536 |
| 55 | pm2-pm21 | 1.548 | 1.106 | 1.862 | 1.235 | 0.009  | 0.51  |
| 56 | pm2-pm22 | 1.016 | 1.048 | 1.017 | 0.977 | 0.026  | 0.29  |
| 57 | pm2-pm23 | 0.995 | 1.071 | 1.004 | 0.999 | 0.032  | 0.291 |
| 58 | pm2-pm24 | 1.003 | 1.016 | 1.015 | 0.995 | 0.002  | 0.897 |
| 59 | pm2-pm25 | 1.02  | 1.022 | 0.991 | 0.998 | 0.011  | 0.385 |
| 60 | pm2-pm26 | 1.02  | 0.975 | 1.018 | 1.011 | 0.009  | 0.437 |
| 61 | pm2-pm27 | 1.004 | 1.069 | 1.034 | 0.989 | -0.007 | 0.441 |
| 62 | pm2-pm28 | 1.019 | 1.036 | 0.998 | 1.017 | 0.004  | 0.668 |
| 63 | pm2-pm29 | 1.014 | 1.013 | 0.997 | 1.008 | 0.003  | 0.793 |
| 64 | pm2-pm30 | 1.039 | 1.032 | 1.022 | 1.024 | 0.02   | 0.234 |
| 65 | pm2-pm31 | 1.052 | 1.088 | 1.044 | 1.02  | 0.016  | 0.352 |



|    |          |       |       |       |       |        |       |
|----|----------|-------|-------|-------|-------|--------|-------|
| 66 | pm2-pm32 | 1.014 | 1.032 | 1.002 | 1.09  | 0.015  | 0.399 |
| 67 | pm2-pm33 | 1.01  | 1.156 | 1     | 1.147 | -0.004 | 0.814 |
| 68 | pm2-pm34 | 1     | 1.026 | 0.97  | 1.089 | 0.012  | 0.37  |
| 69 | pm2-pm35 | 1.025 | 1.015 | 0.937 | 1.143 | 0.006  | 0.495 |
| 70 | pm2-pm36 | 0.988 | 1.035 | 1.007 | 0.991 | 0.008  | 0.407 |
| 71 | pm2-pm37 | 1.013 | 1.001 | 0.982 | 0.999 | 0.002  | 0.715 |
| 72 | pm3-pm4  | 1.029 | 1.098 | 1.017 | 1.014 | 0.008  | 0.415 |
| 73 | pm3-pm5  | 0.998 | 0.997 | 0.997 | 1.045 | -0.004 | 0.748 |
| 74 | pm3-pm6  | 1.013 | 0.976 | 1.009 | 1.029 | -0.001 | 0.988 |
| 75 | pm3-pm7  | 2.876 | 1.964 | 2.669 | 2.258 | -0.115 | 0.008 |
| 76 | pm3-pm8  | 1.002 | 1.042 | 0.983 | 1.068 | -0.005 | 0.43  |
| 77 | pm3-pm9  | 1.043 | 1.055 | 1.035 | 1.048 | -0.004 | 0.981 |
| 78 | pm3-pm10 | 1.471 | 1.517 | 1.252 | 1.565 | -0.018 | 0.335 |
| 79 | pm3-pm11 | 1.017 | 1.03  | 1.007 | 1.02  | 0.011  | 0.388 |
| 80 | pm3-pm12 | 1.028 | 1.03  | 1.018 | 1.011 | -0.001 | 0.788 |
| 81 | pm3-pm13 | 0.932 | 0.899 | 0.894 | 0.851 | 0.024  | 0.212 |
| 82 | pm3-pm14 | 0.915 | 0.961 | 0.912 | 0.889 | 0.01   | 0.523 |
| 83 | pm3-pm15 | 1.108 | 1.217 | 1.096 | 1.071 | -0.052 | 0.039 |
| 84 | pm3-pm16 | 1.164 | 1.156 | 1.149 | 1.111 | -0.024 | 0.26  |
| 85 | pm3-pm17 | 1.175 | 1.199 | 1.14  | 1.067 | -0.042 | 0.165 |
| 86 | pm3-pm18 | 1.022 | 1.025 | 0.973 | 1.022 | -0.009 | 0.534 |
| 87 | pm3-pm19 | 0.98  | 1.048 | 1.041 | 1.049 | -0.02  | 0.333 |
| 88 | pm3-pm20 | 1.022 | 0.988 | 1.009 | 1.03  | -0.014 | 0.305 |
| 89 | pm3-pm21 | 1.53  | 1.16  | 1.827 | 1.194 | -0.013 | 0.37  |
| 90 | pm3-pm22 | 0.998 | 1.059 | 0.978 | 0.992 | 0.007  | 0.555 |
| 91 | pm3-pm23 | 1.022 | 1.089 | 1.004 | 1.029 | 0.04   | 0.241 |
| 92 | pm3-pm24 | 0.998 | 1.049 | 1.009 | 1.033 | 0.006  | 0.513 |
| 93 | pm3-pm25 | 1.013 | 0.972 | 1.001 | 1.023 | -0.006 | 0.584 |
| 94 | pm3-pm26 | 1.025 | 1.01  | 1.009 | 1.039 | 0.013  | 0.381 |
| 95 | pm3-pm27 | 1.023 | 1.075 | 1.032 | 1.03  | -0.002 | 0.782 |

|     |          |       |       |       |       |        |       |
|-----|----------|-------|-------|-------|-------|--------|-------|
| 96  | pm3-pm28 | 1.024 | 1.03  | 0.97  | 1.047 | -0.007 | 0.54  |
| 97  | pm3-pm29 | 1.003 | 1.065 | 1.013 | 1.048 | 0.016  | 0.307 |
| 98  | pm3-pm30 | 1.016 | 1.055 | 0.992 | 1.022 | 0.001  | 0.92  |
| 99  | pm3-pm31 | 1.057 | 1.06  | 1.035 | 1.033 | 0      | 0.94  |
| 100 | pm3-pm32 | 0.987 | 1.03  | 0.987 | 1.118 | 0      | 0.982 |
| 101 | pm3-pm33 | 1.015 | 1.086 | 1.021 | 1.197 | -0.013 | 0.335 |
| 102 | pm3-pm34 | 1.029 | 1.025 | 0.941 | 1.087 | 0.001  | 0.88  |
| 103 | pm3-pm35 | 1.043 | 1.022 | 0.934 | 1.118 | -0.006 | 0.599 |
| 104 | pm3-pm36 | 0.986 | 1.018 | 0.99  | 1.017 | -0.006 | 0.541 |
| 105 | pm3-pm37 | 1.002 | 1.031 | 0.98  | 1.013 | -0.001 | 0.981 |
| 106 | pm4-pm5  | 1.044 | 1.119 | 0.983 | 1.036 | 0.023  | 0.27  |
| 107 | pm4-pm6  | 1.013 | 1.082 | 0.994 | 1.009 | 0.007  | 0.45  |
| 108 | pm4-pm7  | 2.82  | 2.111 | 2.629 | 2.299 | -0.102 | 0.006 |
| 109 | pm4-pm8  | 1.016 | 1.095 | 1.006 | 1.056 | 0.004  | 0.621 |
| 110 | pm4-pm9  | 1.05  | 1.152 | 1.029 | 1.051 | 0.011  | 0.355 |
| 111 | pm4-pm10 | 1.474 | 1.551 | 1.267 | 1.522 | -0.025 | 0.272 |
| 112 | pm4-pm11 | 1.027 | 1.049 | 1.014 | 1.023 | 0.011  | 0.314 |
| 113 | pm4-pm12 | 1.012 | 1.101 | 0.997 | 1.028 | 0.002  | 0.958 |
| 114 | pm4-pm13 | 0.87  | 0.953 | 0.922 | 0.891 | 0.03   | 0.282 |
| 115 | pm4-pm14 | 0.938 | 0.903 | 0.95  | 0.875 | -0.003 | 0.917 |
| 116 | pm4-pm15 | 1.1   | 1.298 | 1.116 | 1.024 | -0.05  | 0.15  |
| 117 | pm4-pm16 | 1.147 | 1.264 | 1.158 | 1.099 | -0.011 | 0.329 |
| 118 | pm4-pm17 | 1.163 | 1.238 | 1.221 | 1.058 | -0.026 | 0.248 |
| 119 | pm4-pm18 | 1.015 | 1.108 | 1.028 | 1.025 | 0.014  | 0.357 |
| 120 | pm4-pm19 | 0.973 | 1.122 | 1.011 | 1.053 | -0.019 | 0.312 |
| 121 | pm4-pm20 | 1.025 | 1.094 | 0.991 | 1.04  | 0.002  | 0.892 |
| 122 | pm4-pm21 | 1.503 | 1.19  | 1.805 | 1.205 | -0.024 | 0.281 |
| 123 | pm4-pm22 | 1.035 | 1.143 | 0.997 | 1.017 | 0.038  | 0.231 |
| 124 | pm4-pm23 | 1.009 | 1.158 | 1.001 | 1.012 | 0.039  | 0.252 |
| 125 | pm4-pm24 | 0.995 | 1.121 | 1.015 | 1.017 | 0.011  | 0.31  |

|     |          |       |       |       |       |        |       |
|-----|----------|-------|-------|-------|-------|--------|-------|
| 126 | pm4-pm25 | 1.012 | 1.089 | 1.007 | 1.003 | 0.01   | 0.515 |
| 127 | pm4-pm26 | 0.984 | 1.107 | 0.996 | 1.004 | 0.005  | 0.776 |
| 128 | pm4-pm27 | 1.01  | 1.147 | 1.038 | 1.025 | 0.003  | 0.798 |
| 129 | pm4-pm28 | 1.033 | 1.111 | 0.996 | 1.047 | 0.013  | 0.377 |
| 130 | pm4-pm29 | 0.984 | 1.174 | 1.002 | 1.037 | 0.024  | 0.232 |
| 131 | pm4-pm30 | 1.047 | 1.079 | 1.024 | 1.061 | 0.023  | 0.291 |
| 132 | pm4-pm31 | 1.035 | 1.205 | 1.04  | 1.026 | 0.021  | 0.207 |
| 133 | pm4-pm32 | 0.997 | 1.091 | 1.006 | 1.039 | -0.007 | 0.492 |
| 134 | pm4-pm33 | 1.03  | 1.161 | 0.972 | 1.179 | -0.017 | 0.355 |
| 135 | pm4-pm34 | 1.009 | 1.153 | 0.93  | 1.086 | 0.015  | 0.359 |
| 136 | pm4-pm35 | 1.028 | 1.118 | 0.936 | 1.116 | 0.005  | 0.909 |
| 137 | pm4-pm36 | 1.014 | 1.065 | 1.006 | 1.001 | 0.003  | 0.875 |
| 138 | pm4-pm37 | 1.016 | 1.083 | 1.014 | 1.015 | 0.015  | 0.398 |
| 139 | pm5-pm6  | 0.987 | 1.011 | 0.999 | 0.989 | -0.002 | 0.68  |
| 140 | pm5-pm7  | 2.848 | 1.983 | 2.677 | 2.281 | -0.101 | 0.009 |
| 141 | pm5-pm8  | 1.027 | 0.993 | 1.007 | 1.079 | 0.006  | 0.598 |
| 142 | pm5-pm9  | 1.069 | 1.077 | 1.012 | 1.017 | 0.003  | 0.787 |
| 143 | pm5-pm10 | 1.424 | 1.475 | 1.238 | 1.496 | -0.052 | 0.021 |
| 144 | pm5-pm11 | 1.011 | 1.01  | 0.989 | 1.012 | 0.007  | 0.595 |
| 145 | pm5-pm12 | 1.035 | 1.024 | 1.017 | 1.046 | 0.017  | 0.352 |
| 146 | pm5-pm13 | 0.899 | 0.824 | 0.909 | 0.831 | 0.005  | 0.501 |
| 147 | pm5-pm14 | 0.944 | 0.898 | 0.948 | 0.915 | 0.025  | 0.232 |
| 148 | pm5-pm15 | 1.138 | 1.15  | 1.13  | 1.003 | -0.06  | 0.039 |
| 149 | pm5-pm16 | 1.149 | 1.163 | 1.119 | 1.068 | -0.035 | 0.203 |
| 150 | pm5-pm17 | 1.187 | 1.169 | 1.235 | 1.032 | -0.022 | 0.218 |
| 151 | pm5-pm18 | 1.032 | 1.011 | 1.013 | 1.025 | 0.009  | 0.536 |
| 152 | pm5-pm19 | 1.009 | 1.001 | 1.018 | 1.045 | -0.022 | 0.298 |
| 153 | pm5-pm20 | 1.034 | 1.013 | 1.019 | 1.029 | 0.007  | 0.465 |
| 154 | pm5-pm21 | 1.547 | 1.13  | 1.84  | 1.232 | 0.006  | 0.532 |
| 155 | pm5-pm22 | 1.009 | 1.004 | 0.999 | 1.003 | 0.013  | 0.381 |

|     |          |       |       |       |       |        |       |
|-----|----------|-------|-------|-------|-------|--------|-------|
| 156 | pm5-pm23 | 1.005 | 1.062 | 1.012 | 1.028 | 0.039  | 0.208 |
| 157 | pm5-pm24 | 0.994 | 1.046 | 0.993 | 1.009 | 0.004  | 0.97  |
| 158 | pm5-pm25 | 1.005 | 0.983 | 1     | 1.006 | -0.001 | 0.978 |
| 159 | pm5-pm26 | 0.99  | 1.003 | 1.02  | 1.028 | 0.011  | 0.369 |
| 160 | pm5-pm27 | 0.996 | 1.074 | 1.043 | 1.015 | -0.001 | 0.909 |
| 161 | pm5-pm28 | 1.022 | 1.013 | 1.003 | 1.037 | 0.003  | 0.831 |
| 162 | pm5-pm29 | 1.012 | 1.034 | 1.004 | 1.049 | 0.018  | 0.359 |
| 163 | pm5-pm30 | 1.053 | 1.024 | 1.009 | 1     | 0.01   | 0.374 |
| 164 | pm5-pm31 | 1.044 | 1.087 | 1.019 | 1.015 | 0.004  | 0.777 |
| 165 | pm5-pm32 | 0.999 | 1.01  | 0.999 | 1.1   | 0.005  | 0.507 |
| 166 | pm5-pm33 | 1.013 | 1.154 | 0.978 | 1.175 | -0.004 | 0.701 |
| 167 | pm5-pm34 | 1     | 1.025 | 0.925 | 1.086 | -0.002 | 0.685 |
| 168 | pm5-pm35 | 1.017 | 1.039 | 0.923 | 1.132 | 0.002  | 0.8   |
| 169 | pm5-pm36 | 1.014 | 1.005 | 1.02  | 0.995 | 0.008  | 0.44  |
| 170 | pm5-pm37 | 1.007 | 0.988 | 0.997 | 1.03  | 0.007  | 0.486 |
| 171 | pm6-pm7  | 2.809 | 2.011 | 2.659 | 2.239 | -0.114 | 0.01  |
| 172 | pm6-pm8  | 1.033 | 1.012 | 0.992 | 1.038 | 0.004  | 0.91  |
| 173 | pm6-pm9  | 1.066 | 1.085 | 1.024 | 1.024 | 0.014  | 0.397 |
| 174 | pm6-pm10 | 1.43  | 1.45  | 1.255 | 1.527 | -0.039 | 0.271 |
| 175 | pm6-pm11 | 1.008 | 0.993 | 1.004 | 1.017 | 0.012  | 0.327 |
| 176 | pm6-pm12 | 1.025 | 1.023 | 0.987 | 1.026 | 0.006  | 0.54  |
| 177 | pm6-pm13 | 0.875 | 0.841 | 0.913 | 0.84  | 0.012  | 0.389 |
| 178 | pm6-pm14 | 0.918 | 0.877 | 0.919 | 0.855 | -0.003 | 0.72  |
| 179 | pm6-pm15 | 1.108 | 1.216 | 1.134 | 1.03  | -0.038 | 0.235 |
| 180 | pm6-pm16 | 1.183 | 1.176 | 1.185 | 1.046 | -0.007 | 0.58  |
| 181 | pm6-pm17 | 1.153 | 1.177 | 1.194 | 1.021 | -0.036 | 0.271 |
| 182 | pm6-pm18 | 1.024 | 1.009 | 0.986 | 1.015 | 0.003  | 0.787 |
| 183 | pm6-pm19 | 1.004 | 1.102 | 1.027 | 1.021 | 0.003  | 0.965 |
| 184 | pm6-pm20 | 1.033 | 1.043 | 0.986 | 1.004 | 0.004  | 0.85  |
| 185 | pm6-pm21 | 1.526 | 1.176 | 1.884 | 1.239 | 0.03   | 0.238 |

|     |          |       |       |       |       |        |        |
|-----|----------|-------|-------|-------|-------|--------|--------|
| 186 | pm6-pm22 | 1.003 | 1.054 | 0.979 | 0.971 | 0.016  | 0.37   |
| 187 | pm6-pm23 | 1.014 | 1.062 | 0.98  | 0.984 | 0.028  | 0.293  |
| 188 | pm6-pm24 | 0.985 | 1.004 | 1.008 | 0.988 | -0.006 | 0.581  |
| 189 | pm6-pm25 | 0.986 | 0.985 | 1.008 | 1.015 | 0.005  | 0.635  |
| 190 | pm6-pm26 | 0.98  | 0.995 | 1.015 | 0.998 | 0.003  | 0.826  |
| 191 | pm6-pm27 | 1.016 | 1.064 | 1.035 | 1     | 0.001  | 0.804  |
| 192 | pm6-pm28 | 0.997 | 0.982 | 1.014 | 1.016 | -0.008 | 0.518  |
| 193 | pm6-pm29 | 0.984 | 1.031 | 0.985 | 1.001 | -0.001 | 0.7    |
| 194 | pm6-pm30 | 1.008 | 1.03  | 0.994 | 1.023 | 0.008  | 0.468  |
| 195 | pm6-pm31 | 1.036 | 1.077 | 1.009 | 1.003 | 0      | 0.885  |
| 196 | pm6-pm32 | 1.004 | 1.023 | 1.001 | 1.082 | 0.011  | 0.322  |
| 197 | pm6-pm33 | 0.998 | 1.102 | 0.974 | 1.185 | -0.014 | 0.343  |
| 198 | pm6-pm34 | 0.988 | 1.022 | 0.92  | 1.088 | -0.001 | 0.883  |
| 199 | pm6-pm35 | 1.022 | 1.059 | 0.966 | 1.118 | 0.02   | 0.201  |
| 200 | pm6-pm36 | 0.981 | 0.994 | 0.987 | 1.015 | -0.001 | 0.81   |
| 201 | pm6-pm37 | 0.992 | 0.971 | 0.996 | 1.006 | -0.002 | 0.782  |
| 202 | pm7-pm8  | 2.876 | 2.031 | 2.635 | 2.288 | -0.107 | 0.007  |
| 203 | pm7-pm9  | 2.954 | 2.149 | 2.695 | 2.264 | -0.07  | 0.039  |
| 204 | pm7-pm10 | 3.863 | 3.026 | 3.279 | 3.287 | 0.359  | <0.001 |
| 205 | pm7-pm11 | 2.85  | 2.009 | 2.607 | 2.266 | -0.11  | 0.006  |
| 206 | pm7-pm12 | 2.801 | 2.003 | 2.621 | 2.288 | -0.13  | 0.008  |
| 207 | pm7-pm13 | 2.905 | 2.125 | 2.823 | 2.314 | 0.137  | 0.006  |
| 208 | pm7-pm14 | 2.996 | 2.173 | 2.892 | 2.408 | 0.172  | 0.002  |
| 209 | pm7-pm15 | 3.055 | 2.412 | 2.894 | 2.345 | -0.033 | 0.295  |
| 210 | pm7-pm16 | 3.193 | 2.313 | 3.076 | 2.412 | 0.045  | 0.19   |
| 211 | pm7-pm17 | 3.196 | 2.305 | 3.134 | 2.356 | 0.025  | 0.268  |
| 212 | pm7-pm18 | 2.813 | 2.043 | 2.632 | 2.286 | -0.112 | 0.006  |
| 213 | pm7-pm19 | 2.818 | 2.035 | 2.715 | 2.257 | -0.129 | 0.006  |
| 214 | pm7-pm20 | 2.887 | 2.023 | 2.665 | 2.272 | -0.1   | 0.008  |
| 215 | pm7-pm21 | 4.075 | 2.224 | 4.54  | 2.731 | 0.417  | <0.001 |

|     |          |       |       |       |       |        |       |
|-----|----------|-------|-------|-------|-------|--------|-------|
| 216 | pm7-pm22 | 2.752 | 2.065 | 2.663 | 2.289 | -0.093 | 0.011 |
| 217 | pm7-pm23 | 2.826 | 2.102 | 2.643 | 2.255 | -0.076 | 0.016 |
| 218 | pm7-pm24 | 2.873 | 2.011 | 2.63  | 2.23  | -0.115 | 0.008 |
| 219 | pm7-pm25 | 2.796 | 2.057 | 2.626 | 2.237 | -0.115 | 0.005 |
| 220 | pm7-pm26 | 2.736 | 1.991 | 2.619 | 2.267 | -0.141 | 0.006 |
| 221 | pm7-pm27 | 2.829 | 2.072 | 2.689 | 2.234 | -0.122 | 0.01  |
| 222 | pm7-pm28 | 2.863 | 2.053 | 2.659 | 2.292 | -0.093 | 0.01  |
| 223 | pm7-pm29 | 2.875 | 1.982 | 2.639 | 2.274 | -0.109 | 0.005 |
| 224 | pm7-pm30 | 2.822 | 2.035 | 2.634 | 2.273 | -0.115 | 0.005 |
| 225 | pm7-pm31 | 2.87  | 2.16  | 2.704 | 2.302 | -0.072 | 0.017 |
| 226 | pm7-pm32 | 2.84  | 2.044 | 2.626 | 2.359 | -0.099 | 0.017 |
| 227 | pm7-pm33 | 2.785 | 2.239 | 2.734 | 2.489 | -0.067 | 0.042 |
| 228 | pm7-pm34 | 2.877 | 2.055 | 2.533 | 2.326 | -0.108 | 0.006 |
| 229 | pm7-pm35 | 2.912 | 2.104 | 2.53  | 2.483 | -0.063 | 0.043 |
| 230 | pm7-pm36 | 2.832 | 1.91  | 2.682 | 2.254 | -0.125 | 0.009 |
| 231 | pm7-pm37 | 2.808 | 1.98  | 2.683 | 2.203 | -0.125 | 0.005 |
| 232 | pm8-pm9  | 1.06  | 1.085 | 1.028 | 1.1   | 0.011  | 0.309 |
| 233 | pm8-pm10 | 1.461 | 1.482 | 1.264 | 1.543 | -0.039 | 0.212 |
| 234 | pm8-pm11 | 1.018 | 0.99  | 1.021 | 1.04  | 0.002  | 0.684 |
| 235 | pm8-pm12 | 1.025 | 1.037 | 0.987 | 1.015 | -0.014 | 0.302 |
| 236 | pm8-pm13 | 0.917 | 0.899 | 0.93  | 0.883 | 0.031  | 0.298 |
| 237 | pm8-pm14 | 0.916 | 0.853 | 0.942 | 0.923 | -0.009 | 0.43  |
| 238 | pm8-pm15 | 1.102 | 1.164 | 1.089 | 1.1   | -0.068 | 0.027 |
| 239 | pm8-pm16 | 1.167 | 1.16  | 1.16  | 1.129 | -0.022 | 0.3   |
| 240 | pm8-pm17 | 1.197 | 1.203 | 1.203 | 1.093 | -0.02  | 0.228 |
| 241 | pm8-pm18 | 1.026 | 1.033 | 1.01  | 1.054 | 0.003  | 0.956 |
| 242 | pm8-pm19 | 0.989 | 1.074 | 1.036 | 1.1   | -0.007 | 0.422 |
| 243 | pm8-pm20 | 1.05  | 1.042 | 1     | 1.039 | -0.001 | 0.966 |
| 244 | pm8-pm21 | 1.544 | 1.092 | 1.837 | 1.251 | -0.017 | 0.392 |
| 245 | pm8-pm22 | 1.049 | 1.073 | 1.004 | 1.036 | 0.033  | 0.273 |

|     |          |       |       |       |       |        |       |
|-----|----------|-------|-------|-------|-------|--------|-------|
| 246 | pm8-pm23 | 1.004 | 1.071 | 0.981 | 1.019 | 0.015  | 0.349 |
| 247 | pm8-pm24 | 1.004 | 1.028 | 0.993 | 1.03  | -0.01  | 0.532 |
| 248 | pm8-pm25 | 1.031 | 1.022 | 0.993 | 1.049 | 0.009  | 0.565 |
| 249 | pm8-pm26 | 1.005 | 1.005 | 1.01  | 1.054 | 0.003  | 0.972 |
| 250 | pm8-pm27 | 1.042 | 1.069 | 1     | 1.046 | -0.01  | 0.307 |
| 251 | pm8-pm28 | 1.007 | 1.031 | 0.994 | 1.082 | -0.003 | 0.745 |
| 252 | pm8-pm29 | 1.02  | 1.098 | 1.018 | 1.054 | 0.024  | 0.203 |
| 253 | pm8-pm30 | 1.057 | 1.007 | 1.015 | 1.043 | 0.003  | 0.851 |
| 254 | pm8-pm31 | 1.054 | 1.104 | 1.056 | 1.048 | 0.012  | 0.314 |
| 255 | pm8-pm32 | 1.008 | 1.06  | 1.005 | 1.136 | 0.014  | 0.397 |
| 256 | pm8-pm33 | 0.994 | 1.144 | 0.997 | 1.218 | -0.012 | 0.398 |
| 257 | pm8-pm34 | 1.002 | 1     | 0.919 | 1.113 | -0.019 | 0.355 |
| 258 | pm8-pm35 | 1.008 | 1.044 | 0.966 | 1.178 | 0.007  | 0.54  |
| 259 | pm8-pm36 | 1.011 | 1.014 | 1.007 | 1.047 | 0.003  | 0.84  |
| 260 | pm8-pm37 | 1.013 | 1.003 | 1.015 | 1.075 | 0.011  | 0.386 |
| 261 | pm9-pm10 | 1.459 | 1.552 | 1.289 | 1.528 | -0.04  | 0.234 |
| 262 | pm9-pm11 | 1.087 | 1.063 | 1.007 | 1.047 | 0.016  | 0.344 |
| 263 | pm9-pm12 | 1.059 | 1.118 | 1.05  | 1.032 | 0.014  | 0.35  |
| 264 | pm9-pm13 | 0.937 | 0.918 | 0.95  | 0.904 | 0.03   | 0.297 |
| 265 | pm9-pm14 | 0.975 | 0.921 | 0.918 | 0.922 | -0.004 | 0.653 |
| 266 | pm9-pm15 | 1.168 | 1.293 | 1.167 | 1.064 | -0.029 | 0.275 |
| 267 | pm9-pm16 | 1.224 | 1.248 | 1.193 | 1.08  | -0.01  | 0.325 |
| 268 | pm9-pm17 | 1.222 | 1.227 | 1.244 | 1.104 | -0.016 | 0.354 |
| 269 | pm9-pm18 | 1.058 | 1.111 | 1.014 | 1.044 | 0.009  | 0.53  |
| 270 | pm9-pm19 | 1.069 | 1.094 | 1.035 | 1.09  | -0.005 | 0.414 |
| 271 | pm9-pm20 | 1.067 | 1.079 | 1.015 | 1.038 | -0.004 | 0.77  |
| 272 | pm9-pm21 | 1.633 | 1.18  | 1.869 | 1.285 | 0.024  | 0.284 |
| 273 | pm9-pm22 | 1.06  | 1.138 | 1.04  | 1.027 | 0.039  | 0.224 |
| 274 | pm9-pm23 | 1.075 | 1.121 | 1.005 | 1.031 | 0.034  | 0.287 |
| 275 | pm9-pm24 | 1.074 | 1.139 | 1.03  | 1.036 | 0.026  | 0.215 |

|     |           |       |       |       |       |        |       |
|-----|-----------|-------|-------|-------|-------|--------|-------|
| 276 | pm9-pm25  | 1.084 | 1.083 | 1.015 | 1.022 | 0.015  | 0.322 |
| 277 | pm9-pm26  | 1.059 | 1.063 | 1.023 | 1.058 | 0.015  | 0.331 |
| 278 | pm9-pm27  | 1.091 | 1.167 | 1.051 | 1.074 | 0.026  | 0.279 |
| 279 | pm9-pm28  | 1.067 | 1.119 | 1.03  | 1.035 | 0.01   | 0.353 |
| 280 | pm9-pm29  | 1.043 | 1.14  | 1.037 | 1.032 | 0.019  | 0.4   |
| 281 | pm9-pm30  | 1.099 | 1.097 | 1.037 | 1.048 | 0.022  | 0.249 |
| 282 | pm9-pm31  | 1.058 | 1.169 | 1.042 | 1.038 | 0.003  | 0.799 |
| 283 | pm9-pm32  | 1.036 | 1.12  | 1.005 | 1.102 | 0.007  | 0.554 |
| 284 | pm9-pm33  | 1.037 | 1.152 | 1     | 1.176 | -0.029 | 0.249 |
| 285 | pm9-pm34  | 1.028 | 1.11  | 0.997 | 1.092 | 0.009  | 0.576 |
| 286 | pm9-pm35  | 1.053 | 1.153 | 0.997 | 1.124 | 0.019  | 0.319 |
| 287 | pm9-pm36  | 1.077 | 1.076 | 1.031 | 1.015 | 0.013  | 0.346 |
| 288 | pm9-pm37  | 1.057 | 1.081 | 1.025 | 1.002 | 0.006  | 0.549 |
| 289 | pm10-pm11 | 1.445 | 1.546 | 1.255 | 1.472 | -0.025 | 0.226 |
| 290 | pm10-pm12 | 1.457 | 1.576 | 1.29  | 1.518 | -0.009 | 0.572 |
| 291 | pm10-pm13 | 1.283 | 1.298 | 1.199 | 1.25  | -0.059 | 0.023 |
| 292 | pm10-pm14 | 1.513 | 1.524 | 1.419 | 1.498 | 0.131  | 0.007 |
| 293 | pm10-pm15 | 1.587 | 1.833 | 1.382 | 1.556 | -0.032 | 0.211 |
| 294 | pm10-pm16 | 1.577 | 1.704 | 1.422 | 1.563 | -0.049 | 0.154 |
| 295 | pm10-pm17 | 1.656 | 1.718 | 1.48  | 1.518 | -0.041 | 0.188 |
| 296 | pm10-pm18 | 1.43  | 1.511 | 1.262 | 1.538 | -0.032 | 0.247 |
| 297 | pm10-pm19 | 1.427 | 1.609 | 1.325 | 1.546 | -0.02  | 0.347 |
| 298 | pm10-pm20 | 1.448 | 1.547 | 1.274 | 1.451 | -0.043 | 0.18  |
| 299 | pm10-pm21 | 2.018 | 1.598 | 2.144 | 1.705 | -0.021 | 0.243 |
| 300 | pm10-pm22 | 1.369 | 1.618 | 1.28  | 1.454 | -0.017 | 0.307 |
| 301 | pm10-pm23 | 1.406 | 1.509 | 1.256 | 1.463 | -0.035 | 0.278 |
| 302 | pm10-pm24 | 1.417 | 1.511 | 1.29  | 1.498 | -0.034 | 0.281 |
| 303 | pm10-pm25 | 1.431 | 1.502 | 1.255 | 1.487 | -0.037 | 0.294 |
| 304 | pm10-pm26 | 1.394 | 1.493 | 1.234 | 1.435 | -0.066 | 0.04  |
| 305 | pm10-pm27 | 1.429 | 1.585 | 1.303 | 1.522 | -0.029 | 0.209 |



|     |           |       |       |       |       |        |       |
|-----|-----------|-------|-------|-------|-------|--------|-------|
| 306 | pm10-pm28 | 1.453 | 1.56  | 1.288 | 1.549 | -0.009 | 0.446 |
| 307 | pm10-pm29 | 1.423 | 1.55  | 1.287 | 1.444 | -0.037 | 0.236 |
| 308 | pm10-pm30 | 1.399 | 1.547 | 1.233 | 1.528 | -0.041 | 0.173 |
| 309 | pm10-pm31 | 1.462 | 1.637 | 1.294 | 1.515 | -0.016 | 0.376 |
| 310 | pm10-pm32 | 1.414 | 1.562 | 1.233 | 1.613 | -0.022 | 0.206 |
| 311 | pm10-pm33 | 1.459 | 1.614 | 1.251 | 1.705 | -0.033 | 0.284 |
| 312 | pm10-pm34 | 1.424 | 1.544 | 1.201 | 1.579 | -0.03  | 0.229 |
| 313 | pm10-pm35 | 1.433 | 1.533 | 1.186 | 1.595 | -0.045 | 0.194 |
| 314 | pm10-pm36 | 1.385 | 1.462 | 1.259 | 1.5   | -0.055 | 0.04  |
| 315 | pm10-pm37 | 1.42  | 1.462 | 1.287 | 1.491 | -0.04  | 0.246 |
| 316 | pm11-pm12 | 0.999 | 1.024 | 1.019 | 1.01  | 0.005  | 0.699 |
| 317 | pm11-pm13 | 0.899 | 0.864 | 0.897 | 0.829 | 0.017  | 0.314 |
| 318 | pm11-pm14 | 0.912 | 0.848 | 0.909 | 0.895 | -0.005 | 0.851 |
| 319 | pm11-pm15 | 1.094 | 1.203 | 1.113 | 1.027 | -0.051 | 0.025 |
| 320 | pm11-pm16 | 1.187 | 1.142 | 1.153 | 1.071 | -0.016 | 0.318 |
| 321 | pm11-pm17 | 1.162 | 1.183 | 1.221 | 1.031 | -0.023 | 0.291 |
| 322 | pm11-pm18 | 1.028 | 0.991 | 0.979 | 1.022 | -0.001 | 0.883 |
| 323 | pm11-pm19 | 1.028 | 1.023 | 1.011 | 1.054 | -0.006 | 0.599 |
| 324 | pm11-pm20 | 1.023 | 1.031 | 0.987 | 1.005 | 0      | 0.89  |
| 325 | pm11-pm21 | 1.529 | 1.104 | 1.811 | 1.199 | -0.015 | 0.314 |
| 326 | pm11-pm22 | 1     | 1.031 | 1.001 | 0.999 | 0.022  | 0.28  |
| 327 | pm11-pm23 | 0.994 | 1.076 | 1.009 | 1.009 | 0.04   | 0.192 |
| 328 | pm11-pm24 | 0.981 | 1.026 | 1.006 | 0.987 | -0.002 | 0.854 |
| 329 | pm11-pm25 | 1.001 | 0.983 | 1.015 | 1.01  | 0.009  | 0.484 |
| 330 | pm11-pm26 | 1.017 | 1.012 | 1.015 | 0.998 | 0.017  | 0.361 |
| 331 | pm11-pm27 | 1.002 | 1.036 | 1.005 | 1.02  | -0.012 | 0.393 |
| 332 | pm11-pm28 | 0.995 | 1.057 | 1.005 | 1.003 | 0.005  | 0.699 |
| 333 | pm11-pm29 | 0.973 | 1.041 | 1.012 | 0.972 | -0.002 | 0.666 |
| 334 | pm11-pm30 | 1.013 | 1.028 | 1.007 | 1.011 | 0.009  | 0.526 |
| 335 | pm11-pm31 | 1.026 | 1.062 | 1.04  | 0.995 | -0.001 | 0.931 |

|     |           |       |       |       |       |        |       |
|-----|-----------|-------|-------|-------|-------|--------|-------|
| 336 | pm11-pm32 | 0.986 | 1.05  | 0.977 | 1.067 | 0.003  | 0.732 |
| 337 | pm11-pm33 | 1.031 | 1.117 | 0.994 | 1.206 | 0.008  | 0.486 |
| 338 | pm11-pm34 | 0.957 | 1.038 | 0.92  | 1.042 | -0.016 | 0.311 |
| 339 | pm11-pm35 | 1.007 | 1.056 | 0.941 | 1.123 | 0.011  | 0.338 |
| 340 | pm11-pm36 | 0.984 | 1.015 | 0.98  | 0.99  | -0.002 | 0.701 |
| 341 | pm11-pm37 | 1.017 | 0.993 | 0.99  | 1.016 | 0.011  | 0.35  |
| 342 | pm12-pm13 | 0.879 | 0.899 | 0.917 | 0.803 | 0.004  | 0.638 |
| 343 | pm12-pm14 | 0.949 | 0.91  | 0.934 | 0.865 | 0.004  | 0.676 |
| 344 | pm12-pm15 | 1.106 | 1.211 | 1.115 | 1.052 | -0.054 | 0.028 |
| 345 | pm12-pm16 | 1.167 | 1.217 | 1.147 | 1.081 | -0.016 | 0.373 |
| 346 | pm12-pm17 | 1.164 | 1.12  | 1.186 | 1.056 | -0.056 | 0.043 |
| 347 | pm12-pm18 | 1.056 | 1.025 | 0.989 | 1.013 | 0      | 0.978 |
| 348 | pm12-pm19 | 1.006 | 1.056 | 1.001 | 1.034 | -0.026 | 0.218 |
| 349 | pm12-pm20 | 1.046 | 1.017 | 1     | 0.989 | -0.014 | 0.342 |
| 350 | pm12-pm21 | 1.529 | 1.142 | 1.815 | 1.236 | -0.011 | 0.314 |
| 351 | pm12-pm22 | 1.006 | 1.052 | 1.012 | 0.992 | 0.015  | 0.368 |
| 352 | pm12-pm23 | 1     | 1.077 | 1.022 | 1.004 | 0.029  | 0.292 |
| 353 | pm12-pm24 | 0.999 | 1.034 | 1.02  | 1.013 | 0      | 0.996 |
| 354 | pm12-pm25 | 1.005 | 1.013 | 0.989 | 1.014 | -0.004 | 0.741 |
| 355 | pm12-pm26 | 1.003 | 1.022 | 1.014 | 1.012 | 0.004  | 0.75  |
| 356 | pm12-pm27 | 1.046 | 1.109 | 1.062 | 1.028 | 0.018  | 0.356 |
| 357 | pm12-pm28 | 1.019 | 1.03  | 0.993 | 1.027 | -0.008 | 0.453 |
| 358 | pm12-pm29 | 0.994 | 1.032 | 1.013 | 1.023 | -0.002 | 0.988 |
| 359 | pm12-pm30 | 1.076 | 1.025 | 1.021 | 1.043 | 0.02   | 0.368 |
| 360 | pm12-pm31 | 1.023 | 1.112 | 1.03  | 0.992 | -0.007 | 0.505 |
| 361 | pm12-pm32 | 1.033 | 1.037 | 0.978 | 1.1   | 0.005  | 0.439 |
| 362 | pm12-pm33 | 1.012 | 1.181 | 1.026 | 1.177 | 0.005  | 0.561 |
| 363 | pm12-pm34 | 0.989 | 1.031 | 0.921 | 1.025 | -0.029 | 0.257 |
| 364 | pm12-pm35 | 1.037 | 1.052 | 0.95  | 1.118 | 0.003  | 0.83  |
| 365 | pm12-pm36 | 0.997 | 1.042 | 0.983 | 1.002 | -0.004 | 0.992 |

|     |           |       |       |       |       |        |       |
|-----|-----------|-------|-------|-------|-------|--------|-------|
| 366 | pm12-pm37 | 1.02  | 0.997 | 1.009 | 1.013 | 0.001  | 0.644 |
| 367 | pm13-pm14 | 0.858 | 0.797 | 0.848 | 0.851 | 0.081  | 0.063 |
| 368 | pm13-pm15 | 0.989 | 1.034 | 0.987 | 0.872 | -0.052 | 0.026 |
| 369 | pm13-pm16 | 1.078 | 0.972 | 1.055 | 0.894 | -0.016 | 0.359 |
| 370 | pm13-pm17 | 0.951 | 0.994 | 1.09  | 0.876 | -0.057 | 0.024 |
| 371 | pm13-pm18 | 0.895 | 0.929 | 0.899 | 0.867 | 0.03   | 0.247 |
| 372 | pm13-pm19 | 0.924 | 0.894 | 0.941 | 0.851 | 0.006  | 0.58  |
| 373 | pm13-pm20 | 0.919 | 0.913 | 0.897 | 0.835 | 0.017  | 0.393 |
| 374 | pm13-pm21 | 1.411 | 0.938 | 1.66  | 1.049 | -0.024 | 0.278 |
| 375 | pm13-pm22 | 0.911 | 0.833 | 0.9   | 0.813 | 0.017  | 0.313 |
| 376 | pm13-pm23 | 0.887 | 0.835 | 0.898 | 0.844 | 0.022  | 0.203 |
| 377 | pm13-pm24 | 0.872 | 0.891 | 0.932 | 0.858 | 0.025  | 0.295 |
| 378 | pm13-pm25 | 0.883 | 0.83  | 0.924 | 0.862 | 0.019  | 0.367 |
| 379 | pm13-pm26 | 0.911 | 0.884 | 0.906 | 0.827 | 0.026  | 0.239 |
| 380 | pm13-pm27 | 0.876 | 0.919 | 0.932 | 0.855 | 0.006  | 0.5   |
| 381 | pm13-pm28 | 0.937 | 0.863 | 0.917 | 0.837 | 0.016  | 0.311 |
| 382 | pm13-pm29 | 0.868 | 0.888 | 0.919 | 0.863 | 0.021  | 0.234 |
| 383 | pm13-pm30 | 0.896 | 0.871 | 0.894 | 0.843 | 0.008  | 0.591 |
| 384 | pm13-pm31 | 0.908 | 0.956 | 0.956 | 0.869 | 0.028  | 0.217 |
| 385 | pm13-pm32 | 0.936 | 0.861 | 0.87  | 0.9   | 0.013  | 0.33  |
| 386 | pm13-pm33 | 0.914 | 0.923 | 0.882 | 0.931 | -0.028 | 0.27  |
| 387 | pm13-pm34 | 0.877 | 0.897 | 0.826 | 0.872 | 0      | 0.881 |
| 388 | pm13-pm35 | 0.899 | 0.865 | 0.824 | 0.947 | 0.001  | 0.687 |
| 389 | pm13-pm36 | 0.898 | 0.833 | 0.882 | 0.818 | 0.001  | 0.997 |
| 390 | pm13-pm37 | 0.917 | 0.843 | 0.877 | 0.812 | 0.007  | 0.545 |
| 391 | pm14-pm15 | 0.999 | 1.096 | 1.054 | 0.904 | -0.049 | 0.186 |
| 392 | pm14-pm16 | 1.019 | 1.029 | 1.057 | 0.927 | -0.049 | 0.2   |
| 393 | pm14-pm17 | 1.024 | 0.984 | 1.111 | 0.923 | -0.064 | 0.037 |
| 394 | pm14-pm18 | 0.918 | 0.931 | 0.902 | 0.874 | -0.002 | 0.726 |
| 395 | pm14-pm19 | 0.912 | 0.947 | 0.927 | 0.891 | -0.018 | 0.316 |

|     |           |       |       |       |       |        |       |
|-----|-----------|-------|-------|-------|-------|--------|-------|
| 396 | pm14-pm20 | 0.914 | 0.908 | 0.93  | 0.911 | 0.001  | 0.925 |
| 397 | pm14-pm21 | 1.428 | 0.955 | 1.749 | 1.093 | -0.022 | 0.24  |
| 398 | pm14-pm22 | 0.923 | 0.927 | 0.953 | 0.868 | 0.03   | 0.25  |
| 399 | pm14-pm23 | 0.908 | 0.943 | 0.902 | 0.872 | 0.022  | 0.207 |
| 400 | pm14-pm24 | 0.916 | 0.872 | 0.925 | 0.889 | -0.003 | 0.711 |
| 401 | pm14-pm25 | 0.934 | 0.858 | 0.948 | 0.857 | 0.003  | 0.959 |
| 402 | pm14-pm26 | 0.935 | 0.934 | 0.917 | 0.885 | 0.022  | 0.23  |
| 403 | pm14-pm27 | 0.907 | 0.977 | 0.957 | 0.918 | 0.01   | 0.44  |
| 404 | pm14-pm28 | 0.939 | 0.86  | 0.904 | 0.921 | -0.007 | 0.468 |
| 405 | pm14-pm29 | 0.927 | 0.9   | 0.895 | 0.874 | -0.005 | 0.527 |
| 406 | pm14-pm30 | 0.933 | 0.874 | 0.913 | 0.866 | -0.012 | 0.303 |
| 407 | pm14-pm31 | 0.939 | 0.946 | 0.996 | 0.927 | 0.018  | 0.305 |
| 408 | pm14-pm32 | 0.912 | 0.92  | 0.939 | 0.965 | 0.015  | 0.362 |
| 409 | pm14-pm33 | 0.934 | 0.968 | 0.925 | 0.983 | -0.029 | 0.201 |
| 410 | pm14-pm34 | 0.942 | 0.899 | 0.895 | 0.921 | 0.006  | 0.591 |
| 411 | pm14-pm35 | 0.912 | 0.885 | 0.905 | 0.988 | -0.001 | 0.874 |
| 412 | pm14-pm36 | 0.919 | 0.878 | 0.911 | 0.892 | 0.003  | 0.891 |
| 413 | pm14-pm37 | 0.946 | 0.877 | 0.938 | 0.887 | 0.016  | 0.378 |
| 414 | pm15-pm16 | 1.29  | 1.401 | 1.22  | 1.13  | -0.061 | 0.029 |
| 415 | pm15-pm17 | 1.246 | 1.402 | 1.281 | 1.094 | -0.084 | 0.012 |
| 416 | pm15-pm18 | 1.17  | 1.195 | 1.097 | 1.019 | -0.052 | 0.034 |
| 417 | pm15-pm19 | 1.132 | 1.289 | 1.168 | 1.095 | -0.031 | 0.267 |
| 418 | pm15-pm20 | 1.108 | 1.223 | 1.152 | 1.04  | -0.048 | 0.166 |
| 419 | pm15-pm21 | 1.705 | 1.3   | 2.1   | 1.267 | 0      | 0.837 |
| 420 | pm15-pm22 | 1.092 | 1.245 | 1.118 | 1.041 | -0.029 | 0.293 |
| 421 | pm15-pm23 | 1.079 | 1.246 | 1.134 | 1.027 | -0.028 | 0.203 |
| 422 | pm15-pm24 | 1.114 | 1.244 | 1.1   | 1.014 | -0.051 | 0.03  |
| 423 | pm15-pm25 | 1.126 | 1.25  | 1.123 | 1.052 | -0.023 | 0.239 |
| 424 | pm15-pm26 | 1.103 | 1.179 | 1.132 | 1.059 | -0.043 | 0.159 |
| 425 | pm15-pm27 | 1.112 | 1.287 | 1.117 | 1.018 | -0.061 | 0.043 |

|     |           |       |       |       |       |        |       |
|-----|-----------|-------|-------|-------|-------|--------|-------|
| 426 | pm15-pm28 | 1.1   | 1.234 | 1.139 | 1.044 | -0.048 | 0.151 |
| 427 | pm15-pm29 | 1.081 | 1.175 | 1.111 | 1.057 | -0.063 | 0.021 |
| 428 | pm15-pm30 | 1.145 | 1.217 | 1.123 | 1.086 | -0.031 | 0.217 |
| 429 | pm15-pm31 | 1.106 | 1.278 | 1.159 | 1.04  | -0.053 | 0.038 |
| 430 | pm15-pm32 | 1.101 | 1.256 | 1.091 | 1.094 | -0.048 | 0.17  |
| 431 | pm15-pm33 | 1.107 | 1.378 | 1.127 | 1.177 | -0.049 | 0.166 |
| 432 | pm15-pm34 | 1.139 | 1.238 | 1.039 | 1.084 | -0.048 | 0.187 |
| 433 | pm15-pm35 | 1.097 | 1.245 | 1.052 | 1.178 | -0.045 | 0.172 |
| 434 | pm15-pm36 | 1.113 | 1.235 | 1.136 | 1.007 | -0.039 | 0.249 |
| 435 | pm15-pm37 | 1.106 | 1.165 | 1.109 | 1.026 | -0.059 | 0.025 |
| 436 | pm16-pm17 | 1.485 | 1.516 | 1.531 | 1.374 | 0.143  | 0.007 |
| 437 | pm16-pm18 | 1.17  | 1.206 | 1.162 | 1.054 | -0.019 | 0.37  |
| 438 | pm16-pm19 | 1.126 | 1.266 | 1.204 | 1.11  | -0.02  | 0.319 |
| 439 | pm16-pm20 | 1.173 | 1.178 | 1.131 | 1.066 | -0.036 | 0.209 |
| 440 | pm16-pm21 | 1.739 | 1.253 | 2.167 | 1.293 | 0.026  | 0.284 |
| 441 | pm16-pm22 | 1.163 | 1.224 | 1.152 | 1.055 | 0.002  | 0.739 |
| 442 | pm16-pm23 | 1.129 | 1.193 | 1.143 | 1.068 | -0.01  | 0.445 |
| 443 | pm16-pm24 | 1.113 | 1.211 | 1.183 | 1.092 | -0.013 | 0.324 |
| 444 | pm16-pm25 | 1.159 | 1.155 | 1.152 | 1.065 | -0.022 | 0.213 |
| 445 | pm16-pm26 | 1.173 | 1.176 | 1.122 | 1.071 | -0.019 | 0.391 |
| 446 | pm16-pm27 | 1.157 | 1.171 | 1.181 | 1.064 | -0.045 | 0.166 |
| 447 | pm16-pm28 | 1.157 | 1.211 | 1.134 | 1.089 | -0.023 | 0.26  |
| 448 | pm16-pm29 | 1.155 | 1.172 | 1.163 | 1.066 | -0.024 | 0.284 |
| 449 | pm16-pm30 | 1.157 | 1.135 | 1.146 | 1.063 | -0.042 | 0.16  |
| 450 | pm16-pm31 | 1.199 | 1.257 | 1.179 | 1.079 | -0.014 | 0.349 |
| 451 | pm16-pm32 | 1.14  | 1.149 | 1.163 | 1.159 | -0.025 | 0.206 |
| 452 | pm16-pm33 | 1.221 | 1.309 | 1.155 | 1.212 | -0.016 | 0.311 |
| 453 | pm16-pm34 | 1.164 | 1.209 | 1.117 | 1.124 | -0.013 | 0.307 |
| 454 | pm16-pm35 | 1.193 | 1.249 | 1.122 | 1.223 | 0.015  | 0.357 |
| 455 | pm16-pm36 | 1.15  | 1.161 | 1.161 | 1.087 | -0.016 | 0.366 |

|     |           |       |       |       |       |        |       |
|-----|-----------|-------|-------|-------|-------|--------|-------|
| 456 | pm16-pm37 | 1.168 | 1.16  | 1.16  | 1.059 | -0.018 | 0.393 |
| 457 | pm17-pm18 | 1.186 | 1.166 | 1.185 | 1.032 | -0.043 | 0.178 |
| 458 | pm17-pm19 | 1.137 | 1.241 | 1.212 | 1.12  | -0.037 | 0.222 |
| 459 | pm17-pm20 | 1.138 | 1.153 | 1.21  | 1.043 | -0.055 | 0.038 |
| 460 | pm17-pm21 | 1.596 | 1.34  | 2.23  | 1.273 | 0.004  | 0.836 |
| 461 | pm17-pm22 | 1.149 | 1.221 | 1.189 | 1     | -0.025 | 0.275 |
| 462 | pm17-pm23 | 1.141 | 1.234 | 1.215 | 0.98  | -0.019 | 0.31  |
| 463 | pm17-pm24 | 1.166 | 1.188 | 1.199 | 1.028 | -0.036 | 0.286 |
| 464 | pm17-pm25 | 1.169 | 1.163 | 1.198 | 1.037 | -0.031 | 0.222 |
| 465 | pm17-pm26 | 1.102 | 1.199 | 1.177 | 1.042 | -0.043 | 0.172 |
| 466 | pm17-pm27 | 1.138 | 1.212 | 1.263 | 1.048 | -0.042 | 0.186 |
| 467 | pm17-pm28 | 1.182 | 1.202 | 1.189 | 1.053 | -0.033 | 0.222 |
| 468 | pm17-pm29 | 1.162 | 1.186 | 1.253 | 1.021 | -0.026 | 0.204 |
| 469 | pm17-pm30 | 1.16  | 1.156 | 1.194 | 1.06  | -0.043 | 0.161 |
| 470 | pm17-pm31 | 1.183 | 1.289 | 1.233 | 1.077 | -0.016 | 0.348 |
| 471 | pm17-pm32 | 1.138 | 1.155 | 1.202 | 1.094 | -0.049 | 0.184 |
| 472 | pm17-pm33 | 1.146 | 1.299 | 1.214 | 1.194 | -0.045 | 0.15  |
| 473 | pm17-pm34 | 1.168 | 1.19  | 1.13  | 1.096 | -0.039 | 0.218 |
| 474 | pm17-pm35 | 1.18  | 1.224 | 1.113 | 1.187 | -0.024 | 0.232 |
| 475 | pm17-pm36 | 1.154 | 1.153 | 1.227 | 1.056 | -0.027 | 0.268 |
| 476 | pm17-pm37 | 1.166 | 1.137 | 1.189 | 1.042 | -0.039 | 0.276 |
| 477 | pm18-pm19 | 1.038 | 1.035 | 1.017 | 1.04  | -0.015 | 0.371 |
| 478 | pm18-pm20 | 1.027 | 1.009 | 0.993 | 1.03  | -0.009 | 0.537 |
| 479 | pm18-pm21 | 1.531 | 1.136 | 1.817 | 1.237 | -0.008 | 0.504 |
| 480 | pm18-pm22 | 1.038 | 1.04  | 0.987 | 1.013 | 0.022  | 0.207 |
| 481 | pm18-pm23 | 1.013 | 1.05  | 0.996 | 1.01  | 0.023  | 0.245 |
| 482 | pm18-pm24 | 1.035 | 1.047 | 0.977 | 1.025 | 0.007  | 0.441 |
| 483 | pm18-pm25 | 1.02  | 1.014 | 1.018 | 1.026 | 0.013  | 0.38  |
| 484 | pm18-pm26 | 1.04  | 0.977 | 1.004 | 1.046 | 0.011  | 0.35  |
| 485 | pm18-pm27 | 1.007 | 1.08  | 1.02  | 1.037 | -0.004 | 0.623 |

|     |           |       |       |       |       |        |       |
|-----|-----------|-------|-------|-------|-------|--------|-------|
| 486 | pm18-pm28 | 1.05  | 1.037 | 1.008 | 1.042 | 0.012  | 0.358 |
| 487 | pm18-pm29 | 1.019 | 1.047 | 0.984 | 0.993 | -0.003 | 0.615 |
| 488 | pm18-pm30 | 1.075 | 1.023 | 1.025 | 1.01  | 0.014  | 0.303 |
| 489 | pm18-pm31 | 1.02  | 1.092 | 0.997 | 1.054 | -0.003 | 0.712 |
| 490 | pm18-pm32 | 1.026 | 1.055 | 0.999 | 1.099 | 0.016  | 0.345 |
| 491 | pm18-pm33 | 1.027 | 1.152 | 1     | 1.185 | 0      | 0.893 |
| 492 | pm18-pm34 | 1.047 | 1.031 | 0.915 | 1.1   | 0.005  | 0.92  |
| 493 | pm18-pm35 | 1.069 | 1.08  | 0.939 | 1.165 | 0.03   | 0.298 |
| 494 | pm18-pm36 | 1.037 | 1.007 | 1     | 1.045 | 0.015  | 0.359 |
| 495 | pm18-pm37 | 1.035 | 1.018 | 0.988 | 1.032 | 0.012  | 0.322 |
| 496 | pm19-pm20 | 0.988 | 1.099 | 1.02  | 1.028 | -0.02  | 0.237 |
| 497 | pm19-pm21 | 1.536 | 1.135 | 1.886 | 1.26  | -0.014 | 0.395 |
| 498 | pm19-pm22 | 0.993 | 1.04  | 1.014 | 1.022 | -0.01  | 0.385 |
| 499 | pm19-pm23 | 1.002 | 1.078 | 1.012 | 1.033 | 0.008  | 0.591 |
| 500 | pm19-pm24 | 1.007 | 1.037 | 1.022 | 1.028 | -0.02  | 0.256 |
| 501 | pm19-pm25 | 1.005 | 1.056 | 1.024 | 1.051 | -0.001 | 0.663 |
| 502 | pm19-pm26 | 1.002 | 1.07  | 1.012 | 1.041 | -0.004 | 0.615 |
| 503 | pm19-pm27 | 1.002 | 1.117 | 1.051 | 1.086 | -0.005 | 0.535 |
| 504 | pm19-pm28 | 0.998 | 1.058 | 1.04  | 1.084 | -0.007 | 0.559 |
| 505 | pm19-pm29 | 1.001 | 1.085 | 1.037 | 1.05  | 0      | 0.802 |
| 506 | pm19-pm30 | 1.005 | 1.057 | 1.027 | 1.038 | -0.016 | 0.367 |
| 507 | pm19-pm31 | 1.028 | 1.133 | 1.035 | 1.025 | -0.018 | 0.339 |
| 508 | pm19-pm32 | 1.025 | 1.033 | 1.031 | 1.116 | -0.007 | 0.584 |
| 509 | pm19-pm33 | 0.98  | 1.184 | 1.012 | 1.16  | -0.036 | 0.26  |
| 510 | pm19-pm34 | 0.991 | 1.059 | 0.929 | 1.102 | -0.027 | 0.202 |
| 511 | pm19-pm35 | 1.014 | 1.135 | 0.985 | 1.146 | 0.007  | 0.58  |
| 512 | pm19-pm36 | 1.017 | 1.033 | 1.022 | 1.046 | -0.007 | 0.541 |
| 513 | pm19-pm37 | 0.984 | 1.068 | 1.044 | 1.003 | -0.01  | 0.353 |
| 514 | pm20-pm21 | 1.542 | 1.15  | 1.836 | 1.22  | -0.008 | 0.451 |
| 515 | pm20-pm22 | 1.039 | 1.116 | 0.992 | 1.021 | 0.038  | 0.286 |

|     |           |       |       |       |       |        |       |
|-----|-----------|-------|-------|-------|-------|--------|-------|
| 516 | pm20-pm23 | 1.036 | 1.085 | 1.005 | 1.019 | 0.036  | 0.231 |
| 517 | pm20-pm24 | 1.03  | 1.07  | 1.017 | 0.995 | 0.008  | 0.586 |
| 518 | pm20-pm25 | 1.02  | 1.054 | 1.018 | 1.039 | 0.021  | 0.273 |
| 519 | pm20-pm26 | 1.033 | 1.067 | 0.993 | 1.004 | 0.012  | 0.339 |
| 520 | pm20-pm27 | 1.048 | 1.019 | 1.013 | 1.025 | -0.02  | 0.26  |
| 521 | pm20-pm28 | 1.029 | 1.042 | 1.009 | 1.045 | 0.002  | 0.836 |
| 522 | pm20-pm29 | 0.992 | 1.047 | 0.941 | 1.034 | -0.017 | 0.367 |
| 523 | pm20-pm30 | 1.06  | 1.054 | 0.995 | 1.024 | 0.008  | 0.428 |
| 524 | pm20-pm31 | 1.023 | 1.128 | 1.058 | 1.022 | 0.007  | 0.585 |
| 525 | pm20-pm32 | 1.015 | 1.052 | 1.004 | 1.079 | 0.003  | 0.636 |
| 526 | pm20-pm33 | 1.05  | 1.108 | 1.012 | 1.135 | -0.021 | 0.259 |
| 527 | pm20-pm34 | 0.996 | 1.066 | 0.937 | 1.089 | -0.002 | 0.825 |
| 528 | pm20-pm35 | 1.005 | 1.041 | 0.952 | 1.145 | -0.004 | 0.697 |
| 529 | pm20-pm36 | 1.033 | 1.014 | 0.994 | 0.987 | -0.006 | 0.574 |
| 530 | pm20-pm37 | 0.999 | 1.023 | 0.984 | 1.021 | -0.005 | 0.424 |
| 531 | pm21-pm22 | 1.501 | 1.145 | 1.82  | 1.179 | -0.007 | 0.499 |
| 532 | pm21-pm23 | 1.534 | 1.158 | 1.845 | 1.179 | 0.014  | 0.369 |
| 533 | pm21-pm24 | 1.578 | 1.157 | 1.798 | 1.19  | -0.004 | 0.999 |
| 534 | pm21-pm25 | 1.532 | 1.104 | 1.822 | 1.232 | -0.004 | 0.912 |
| 535 | pm21-pm26 | 1.524 | 1.103 | 1.828 | 1.199 | -0.013 | 0.376 |
| 536 | pm21-pm27 | 1.526 | 1.184 | 1.841 | 1.22  | -0.018 | 0.388 |
| 537 | pm21-pm28 | 1.54  | 1.138 | 1.846 | 1.258 | 0.002  | 0.775 |
| 538 | pm21-pm29 | 1.556 | 1.101 | 1.777 | 1.172 | -0.033 | 0.262 |
| 539 | pm21-pm30 | 1.517 | 1.091 | 1.82  | 1.206 | -0.03  | 0.256 |
| 540 | pm21-pm31 | 1.531 | 1.145 | 1.846 | 1.214 | -0.031 | 0.202 |
| 541 | pm21-pm32 | 1.511 | 1.17  | 1.807 | 1.271 | -0.009 | 0.559 |
| 542 | pm21-pm33 | 1.541 | 1.205 | 1.88  | 1.385 | -0.009 | 0.498 |
| 543 | pm21-pm34 | 1.554 | 1.148 | 1.78  | 1.248 | -0.006 | 0.405 |
| 544 | pm21-pm35 | 1.523 | 1.201 | 1.752 | 1.361 | 0.006  | 0.522 |
| 545 | pm21-pm36 | 1.499 | 1.104 | 1.833 | 1.189 | -0.021 | 0.205 |



|     |           |       |       |       |       |        |       |
|-----|-----------|-------|-------|-------|-------|--------|-------|
| 546 | pm21-pm37 | 1.511 | 1.122 | 1.871 | 1.176 | -0.006 | 0.558 |
| 547 | pm22-pm23 | 0.996 | 1.037 | 1.011 | 0.993 | 0.035  | 0.216 |
| 548 | pm22-pm24 | 0.968 | 1.071 | 1.002 | 0.992 | 0.014  | 0.377 |
| 549 | pm22-pm25 | 0.985 | 1.016 | 1.002 | 1.008 | 0.017  | 0.382 |
| 550 | pm22-pm26 | 1.001 | 1.05  | 1.004 | 0.984 | 0.024  | 0.226 |
| 551 | pm22-pm27 | 1.033 | 1.107 | 1.002 | 1.03  | 0.023  | 0.222 |
| 552 | pm22-pm28 | 1.027 | 1.045 | 1.024 | 1.039 | 0.031  | 0.209 |
| 553 | pm22-pm29 | 0.99  | 1.063 | 1.008 | 0.991 | 0.019  | 0.327 |
| 554 | pm22-pm30 | 0.987 | 1.092 | 0.978 | 0.974 | 0.009  | 0.48  |
| 555 | pm22-pm31 | 1.041 | 1.116 | 1.009 | 0.974 | 0.011  | 0.328 |
| 556 | pm22-pm32 | 1.001 | 1.062 | 1.013 | 1.052 | 0.023  | 0.228 |
| 557 | pm22-pm33 | 1.012 | 1.169 | 1     | 1.142 | 0.01   | 0.518 |
| 558 | pm22-pm34 | 0.977 | 1.044 | 0.922 | 1.048 | 0      | 0.618 |
| 559 | pm22-pm35 | 1.02  | 1.08  | 0.965 | 1.098 | 0.028  | 0.234 |
| 560 | pm22-pm36 | 1.01  | 1.023 | 0.979 | 0.976 | 0.01   | 0.492 |
| 561 | pm22-pm37 | 0.973 | 1.03  | 0.969 | 1.01  | 0.01   | 0.382 |
| 562 | pm23-pm24 | 1.033 | 1.127 | 0.981 | 0.99  | 0.042  | 0.159 |
| 563 | pm23-pm25 | 0.992 | 1.058 | 0.996 | 1.036 | 0.038  | 0.211 |
| 564 | pm23-pm26 | 1.026 | 1.053 | 0.993 | 1.02  | 0.04   | 0.167 |
| 565 | pm23-pm27 | 1.033 | 1.134 | 1.031 | 1.004 | 0.034  | 0.248 |
| 566 | pm23-pm28 | 1.018 | 1.058 | 0.969 | 1.031 | 0.02   | 0.209 |
| 567 | pm23-pm29 | 1.003 | 1.036 | 0.981 | 0.98  | 0.009  | 0.458 |
| 568 | pm23-pm30 | 0.999 | 1.059 | 0.972 | 0.978 | 0.007  | 0.523 |
| 569 | pm23-pm31 | 1.025 | 1.168 | 1.012 | 1.019 | 0.036  | 0.292 |
| 570 | pm23-pm32 | 0.992 | 1.092 | 0.971 | 1.079 | 0.028  | 0.233 |
| 571 | pm23-pm33 | 1.021 | 1.185 | 0.973 | 1.138 | 0.012  | 0.324 |
| 572 | pm23-pm34 | 0.971 | 1.096 | 0.965 | 1.006 | 0.015  | 0.348 |
| 573 | pm23-pm35 | 1.033 | 1.077 | 0.914 | 1.099 | 0.021  | 0.295 |
| 574 | pm23-pm36 | 0.995 | 1.056 | 0.978 | 1.005 | 0.025  | 0.267 |
| 575 | pm23-pm37 | 0.972 | 1.073 | 1.03  | 1.005 | 0.038  | 0.236 |

|     |           |       |       |       |       |        |       |
|-----|-----------|-------|-------|-------|-------|--------|-------|
| 576 | pm24-pm25 | 0.991 | 1.039 | 0.986 | 0.991 | 0      | 0.973 |
| 577 | pm24-pm26 | 0.982 | 1.034 | 1.014 | 0.997 | 0.004  | 0.667 |
| 578 | pm24-pm27 | 0.985 | 1.082 | 1.053 | 0.989 | -0.009 | 0.445 |
| 579 | pm24-pm28 | 0.975 | 1.043 | 1.002 | 1.014 | -0.01  | 0.325 |
| 580 | pm24-pm29 | 0.965 | 1.073 | 1.013 | 0.987 | -0.001 | 0.752 |
| 581 | pm24-pm30 | 1.003 | 1.063 | 0.992 | 1.022 | 0.005  | 0.48  |
| 582 | pm24-pm31 | 1.013 | 1.127 | 1.021 | 0.996 | -0.001 | 0.687 |
| 583 | pm24-pm32 | 0.988 | 1.059 | 1     | 1.073 | 0.005  | 0.533 |
| 584 | pm24-pm33 | 1.023 | 1.169 | 0.993 | 1.171 | 0.002  | 0.928 |
| 585 | pm24-pm34 | 1.017 | 1.082 | 0.932 | 1.065 | 0.009  | 0.465 |
| 586 | pm24-pm35 | 1.024 | 1.102 | 0.927 | 1.106 | 0.01   | 0.336 |
| 587 | pm24-pm36 | 0.987 | 1.018 | 0.988 | 0.997 | -0.006 | 0.599 |
| 588 | pm24-pm37 | 0.992 | 1     | 0.985 | 0.996 | -0.009 | 0.505 |
| 589 | pm25-pm26 | 0.989 | 1.002 | 0.982 | 0.989 | -0.004 | 0.939 |
| 590 | pm25-pm27 | 0.998 | 1.065 | 1.023 | 0.982 | -0.011 | 0.339 |
| 591 | pm25-pm28 | 1.002 | 1.042 | 1.006 | 1.032 | 0.01   | 0.55  |
| 592 | pm25-pm29 | 1.019 | 1.047 | 1.008 | 0.985 | 0.012  | 0.307 |
| 593 | pm25-pm30 | 1.022 | 1.04  | 1.03  | 1.003 | 0.017  | 0.351 |
| 594 | pm25-pm31 | 1.019 | 1.125 | 1.002 | 0.988 | 0.001  | 0.803 |
| 595 | pm25-pm32 | 1.001 | 1.046 | 1.002 | 1.045 | 0.007  | 0.511 |
| 596 | pm25-pm33 | 0.998 | 1.1   | 1.017 | 1.145 | -0.014 | 0.341 |
| 597 | pm25-pm34 | 0.989 | 1.039 | 0.915 | 1.071 | -0.003 | 0.962 |
| 598 | pm25-pm35 | 1.03  | 1.095 | 0.944 | 1.147 | 0.033  | 0.201 |
| 599 | pm25-pm36 | 0.989 | 0.987 | 1.001 | 1.01  | 0.002  | 0.629 |
| 600 | pm25-pm37 | 0.984 | 0.973 | 0.987 | 1.007 | -0.006 | 0.569 |
| 601 | pm26-pm27 | 0.986 | 1.013 | 1.033 | 0.99  | -0.023 | 0.253 |
| 602 | pm26-pm28 | 1.009 | 0.992 | 1.029 | 1.039 | 0.007  | 0.413 |
| 603 | pm26-pm29 | 0.994 | 1.089 | 1.011 | 0.993 | 0.019  | 0.323 |
| 604 | pm26-pm30 | 1.02  | 1.027 | 1.008 | 1.003 | 0.008  | 0.436 |
| 605 | pm26-pm31 | 1.016 | 1.093 | 1.028 | 1.009 | 0.004  | 0.919 |

|     |           |       |       |       |       |        |       |
|-----|-----------|-------|-------|-------|-------|--------|-------|
| 606 | pm26-pm32 | 0.987 | 1.025 | 0.974 | 1.061 | -0.005 | 0.45  |
| 607 | pm26-pm33 | 1.021 | 1.129 | 0.996 | 1.173 | 0      | 0.694 |
| 608 | pm26-pm34 | 0.998 | 1.026 | 0.928 | 1.068 | -0.002 | 0.957 |
| 609 | pm26-pm35 | 1.01  | 1.015 | 0.962 | 1.141 | 0.011  | 0.376 |
| 610 | pm26-pm36 | 1.005 | 0.993 | 0.982 | 0.99  | -0.003 | 0.844 |
| 611 | pm26-pm37 | 1.018 | 1.018 | 1.009 | 0.984 | 0.013  | 0.395 |
| 612 | pm27-pm28 | 1.015 | 1.094 | 1.04  | 1.015 | -0.004 | 0.937 |
| 613 | pm27-pm29 | 1.002 | 1.085 | 1.023 | 1.024 | -0.003 | 0.89  |
| 614 | pm27-pm30 | 1.035 | 1.047 | 1.026 | 1.01  | -0.011 | 0.36  |
| 615 | pm27-pm31 | 1.051 | 1.194 | 1.057 | 1.027 | 0.016  | 0.313 |
| 616 | pm27-pm32 | 1.025 | 1.128 | 1.006 | 1.095 | 0.013  | 0.331 |
| 617 | pm27-pm33 | 1.017 | 1.16  | 1.048 | 1.183 | -0.011 | 0.313 |
| 618 | pm27-pm34 | 1.017 | 1.116 | 0.956 | 1.065 | -0.002 | 0.745 |
| 619 | pm27-pm35 | 1.006 | 1.086 | 0.979 | 1.118 | -0.008 | 0.405 |
| 620 | pm27-pm36 | 1.028 | 1.024 | 1.042 | 0.997 | -0.006 | 0.524 |
| 621 | pm27-pm37 | 1.021 | 1.056 | 1.043 | 1.022 | 0.007  | 0.516 |
| 622 | pm28-pm29 | 1.026 | 1.038 | 0.998 | 1.027 | 0.004  | 0.741 |
| 623 | pm28-pm30 | 1.042 | 1.078 | 0.999 | 1.061 | 0.022  | 0.289 |
| 624 | pm28-pm31 | 1.047 | 1.106 | 1.027 | 1.031 | 0.004  | 0.885 |
| 625 | pm28-pm32 | 1.025 | 1.064 | 1.007 | 1.093 | 0.014  | 0.381 |
| 626 | pm28-pm33 | 1.018 | 1.201 | 0.96  | 1.197 | -0.002 | 0.702 |
| 627 | pm28-pm34 | 0.998 | 1.061 | 0.899 | 1.063 | -0.017 | 0.399 |
| 628 | pm28-pm35 | 1.031 | 1.069 | 0.954 | 1.111 | 0.004  | 0.773 |
| 629 | pm28-pm36 | 0.995 | 1.035 | 1.018 | 1.031 | 0.008  | 0.431 |
| 630 | pm28-pm37 | 1.015 | 1.047 | 1.018 | 1.011 | 0.012  | 0.381 |
| 631 | pm29-pm30 | 1.033 | 1.02  | 1.015 | 1.042 | 0.013  | 0.338 |
| 632 | pm29-pm31 | 1.046 | 1.158 | 1.06  | 1.015 | 0.03   | 0.263 |
| 633 | pm29-pm32 | 0.99  | 1.051 | 1.003 | 1.066 | 0.003  | 0.806 |
| 634 | pm29-pm33 | 1.018 | 1.149 | 1.022 | 1.173 | 0.003  | 0.622 |
| 635 | pm29-pm34 | 1     | 1.073 | 0.904 | 1.081 | 0      | 0.69  |

|     |           |       |       |       |       |        |       |
|-----|-----------|-------|-------|-------|-------|--------|-------|
| 636 | pm29-pm35 | 1.05  | 1.039 | 0.96  | 1.156 | 0.022  | 0.285 |
| 637 | pm29-pm36 | 0.993 | 1.056 | 0.988 | 0.985 | 0.002  | 0.68  |
| 638 | pm29-pm37 | 0.973 | 1.033 | 0.962 | 0.995 | -0.011 | 0.319 |
| 639 | pm30-pm31 | 1.063 | 1.138 | 1.045 | 1.023 | 0.022  | 0.211 |
| 640 | pm30-pm32 | 1.038 | 1.049 | 0.99  | 1.073 | 0.008  | 0.434 |
| 641 | pm30-pm33 | 1.064 | 1.161 | 1.001 | 1.166 | 0.006  | 0.434 |
| 642 | pm30-pm34 | 0.99  | 1.037 | 0.91  | 1.064 | -0.018 | 0.399 |
| 643 | pm30-pm35 | 1.048 | 1.049 | 0.937 | 1.175 | 0.019  | 0.383 |
| 644 | pm30-pm36 | 1.026 | 1.022 | 1.004 | 1.008 | 0.007  | 0.585 |
| 645 | pm30-pm37 | 1.024 | 0.99  | 1.011 | 1.024 | 0.006  | 0.517 |
| 646 | pm31-pm32 | 1.038 | 1.171 | 1.005 | 1.061 | 0.014  | 0.35  |
| 647 | pm31-pm33 | 1.061 | 1.174 | 1.03  | 1.193 | -0.003 | 0.865 |
| 648 | pm31-pm34 | 1.042 | 1.164 | 0.973 | 1.067 | 0.017  | 0.317 |
| 649 | pm31-pm35 | 1.035 | 1.17  | 0.983 | 1.152 | 0.026  | 0.202 |
| 650 | pm31-pm36 | 1.028 | 1.07  | 1.019 | 1.008 | -0.002 | 0.734 |
| 651 | pm31-pm37 | 1.049 | 1.123 | 1.04  | 1.004 | 0.022  | 0.295 |
| 652 | pm32-pm33 | 1.014 | 1.181 | 1.015 | 1.218 | 0.005  | 0.508 |
| 653 | pm32-pm34 | 1.016 | 1.078 | 0.931 | 1.129 | 0.009  | 0.427 |
| 654 | pm32-pm35 | 1.071 | 1.104 | 0.915 | 1.19  | 0.026  | 0.24  |
| 655 | pm32-pm36 | 1.015 | 1.034 | 0.973 | 1.049 | 0      | 0.921 |
| 656 | pm32-pm37 | 0.988 | 1.037 | 0.97  | 1.057 | -0.004 | 0.755 |
| 657 | pm33-pm34 | 1.014 | 1.109 | 0.985 | 1.22  | -0.009 | 0.5   |
| 658 | pm33-pm35 | 1.046 | 1.187 | 0.91  | 1.288 | 0.001  | 0.668 |
| 659 | pm33-pm36 | 0.987 | 1.121 | 1.003 | 1.17  | -0.01  | 0.574 |
| 660 | pm33-pm37 | 1.018 | 1.141 | 1.007 | 1.167 | 0.004  | 0.9   |
| 661 | pm34-pm35 | 1.018 | 1.05  | 0.918 | 1.14  | -0.002 | 0.704 |
| 662 | pm34-pm36 | 0.988 | 1.031 | 0.942 | 1.069 | 0      | 0.998 |
| 663 | pm34-pm37 | 0.99  | 1.039 | 0.93  | 1.044 | -0.005 | 0.476 |
| 664 | pm35-pm36 | 1.016 | 1.093 | 0.948 | 1.1   | 0.017  | 0.35  |
| 665 | pm35-pm37 | 1.021 | 1.048 | 0.903 | 1.145 | 0.008  | 0.59  |

|     |           |       |       |       |       |       |       |
|-----|-----------|-------|-------|-------|-------|-------|-------|
| 666 | pm36-pm37 | 1.007 | 1.004 | 0.997 | 1.016 | 0.011 | 0.301 |
|-----|-----------|-------|-------|-------|-------|-------|-------|

3d) Result of two-distribution perturbation analysis for hypertrophy when four different response function types were applied in a combined manner (combination of response functions)

| No | Pair of perturbed parameter distributions | 1 million parameter sets |         | 10 million parameter sets |         | 100 million parameter sets |         |
|----|-------------------------------------------|--------------------------|---------|---------------------------|---------|----------------------------|---------|
|    |                                           | Synergistic effect       | p-value | Synergistic effect        | p-value | Synergistic effect         | p-value |
| 1  | pm1-pm2                                   | 0                        | 0.968   | 0.004                     | 0.792   | -0.012                     | 0.324   |
| 2  | pm1-pm3                                   | 0.032                    | 0.29    | 0.019                     | 0.346   | 0.003                      | 0.69    |
| 3  | pm1-pm4                                   | 0                        | 0.606   | 0.009                     | 0.573   | 0.004                      | 0.952   |
| 4  | pm1-pm5                                   | 0.025                    | 0.257   | 0.02                      | 0.329   | 0.016                      | 0.346   |
| 5  | pm1-pm6                                   | -0.029                   | 0.23    | -0.012                    | 0.365   | -0.023                     | 0.203   |
| 6  | pm1-pm7                                   | -0.032                   | 0.245   | -0.053                    | 0.029   | -0.032                     | 0.216   |
| 7  | pm1-pm8                                   | 0.016                    | 0.33    | 0.024                     | 0.25    | 0.008                      | 0.476   |
| 8  | pm1-pm9                                   | 0.035                    | 0.274   | 0.016                     | 0.397   | -0.006                     | 0.41    |
| 9  | pm1-pm10                                  | -0.379                   | <0.001  | -0.399                    | <0.001  | -0.417                     | <0.001  |
| 10 | pm1-pm11                                  | -0.02                    | 0.266   | -0.006                    | 0.429   | 0.023                      | 0.261   |
| 11 | pm1-pm12                                  | 0.017                    | 0.318   | 0.023                     | 0.249   | 0.009                      | 0.55    |
| 12 | pm1-pm13                                  | 0.002                    | 0.976   | 0.021                     | 0.264   | 0.013                      | 0.372   |
| 13 | pm1-pm14                                  | -0.037                   | 0.248   | -0.025                    | 0.212   | -0.012                     | 0.307   |
| 14 | pm1-pm15                                  | -0.063                   | 0.03    | -0.085                    | 0.013   | -0.088                     | 0.011   |
| 15 | pm1-pm16                                  | 0.006                    | 0.465   | -0.001                    | 0.832   | -0.028                     | 0.256   |
| 16 | pm1-pm17                                  | 0.025                    | 0.202   | 0.019                     | 0.395   | 0.016                      | 0.329   |
| 17 | pm1-pm18                                  | 0.003                    | 0.928   | 0.001                     | 0.833   | 0.02                       | 0.302   |
| 18 | pm1-pm19                                  | 0.008                    | 0.531   | -0.011                    | 0.311   | -0.021                     | 0.209   |

|    |          |        |        |        |        |        |        |
|----|----------|--------|--------|--------|--------|--------|--------|
| 19 | pm1-pm20 | 0      | 0.818  | 0.031  | 0.218  | 0.01   | 0.397  |
| 20 | pm1-pm21 | -0.402 | <0.001 | -0.408 | <0.001 | -0.377 | <0.001 |
| 21 | pm1-pm22 | 0.039  | 0.253  | -0.003 | 0.692  | 0.01   | 0.476  |
| 22 | pm1-pm23 | -0.187 | 0.003  | -0.169 | 0.001  | -0.185 | 0.001  |
| 23 | pm1-pm24 | 0      | 0.915  | 0.011  | 0.388  | 0.008  | 0.509  |
| 24 | pm1-pm25 | -0.006 | 0.463  | 0.033  | 0.206  | 0.037  | 0.281  |
| 25 | pm1-pm26 | -0.022 | 0.239  | 0.002  | 0.601  | -0.005 | 0.663  |
| 26 | pm1-pm27 | -0.01  | 0.551  | -0.003 | 0.968  | 0.016  | 0.385  |
| 27 | pm1-pm28 | 0.007  | 0.559  | 0.018  | 0.335  | -0.015 | 0.307  |
| 28 | pm1-pm29 | 0.03   | 0.261  | 0.023  | 0.243  | -0.002 | 0.902  |
| 29 | pm1-pm30 | 0.008  | 0.495  | 0.016  | 0.332  | 0.038  | 0.223  |
| 30 | pm1-pm31 | 0.007  | 0.492  | -0.012 | 0.392  | 0.024  | 0.254  |
| 31 | pm1-pm32 | 0.025  | 0.26   | -0.015 | 0.39   | -0.008 | 0.504  |
| 32 | pm1-pm33 | -0.009 | 0.577  | 0.016  | 0.369  | 0.027  | 0.264  |
| 33 | pm1-pm34 | -0.049 | 0.171  | -0.033 | 0.212  | -0.027 | 0.267  |
| 34 | pm1-pm35 | 0.016  | 0.341  | -0.02  | 0.205  | -0.008 | 0.502  |
| 35 | pm1-pm36 | 0.004  | 0.962  | 0.002  | 0.968  | 0.033  | 0.292  |
| 36 | pm1-pm37 | 0.012  | 0.37   | 0.006  | 0.404  | 0.033  | 0.238  |
| 37 | pm2-pm3  | -0.003 | 0.697  | -0.037 | 0.263  | -0.002 | 0.724  |
| 38 | pm2-pm4  | -0.003 | 0.861  | -0.017 | 0.381  | -0.023 | 0.212  |
| 39 | pm2-pm5  | -0.005 | 0.986  | -0.017 | 0.363  | -0.011 | 0.322  |
| 40 | pm2-pm6  | 0.022  | 0.202  | 0.015  | 0.305  | -0.002 | 0.648  |
| 41 | pm2-pm7  | 0.015  | 0.357  | 0.006  | 0.456  | 0.012  | 0.395  |
| 42 | pm2-pm8  | 0      | 0.938  | -0.027 | 0.238  | -0.025 | 0.223  |
| 43 | pm2-pm9  | 0.003  | 0.73   | 0.039  | 0.258  | 0.031  | 0.261  |
| 44 | pm2-pm10 | -0.427 | <0.001 | -0.389 | <0.001 | -0.427 | <0.001 |
| 45 | pm2-pm11 | -0.017 | 0.365  | -0.026 | 0.224  | -0.027 | 0.255  |
| 46 | pm2-pm12 | 0.019  | 0.353  | 0.01   | 0.307  | -0.022 | 0.279  |
| 47 | pm2-pm13 | -0.03  | 0.214  | -0.031 | 0.296  | -0.017 | 0.307  |
| 48 | pm2-pm14 | -0.016 | 0.341  | -0.037 | 0.237  | -0.023 | 0.213  |

|    |          |        |        |        |        |        |        |
|----|----------|--------|--------|--------|--------|--------|--------|
| 49 | pm2-pm15 | -0.119 | 0.009  | -0.108 | 0.01   | -0.095 | 0.014  |
| 50 | pm2-pm16 | -0.093 | 0.014  | -0.097 | 0.02   | -0.077 | 0.017  |
| 51 | pm2-pm17 | -0.01  | 0.36   | 0.001  | 0.632  | -0.023 | 0.235  |
| 52 | pm2-pm18 | 0.045  | 0.184  | 0.016  | 0.35   | 0.039  | 0.222  |
| 53 | pm2-pm19 | -0.003 | 0.825  | -0.004 | 0.726  | -0.016 | 0.376  |
| 54 | pm2-pm20 | 0.008  | 0.477  | -0.008 | 0.416  | 0.016  | 0.36   |
| 55 | pm2-pm21 | -0.327 | <0.001 | -0.366 | <0.001 | -0.342 | <0.001 |
| 56 | pm2-pm22 | 0.025  | 0.235  | -0.002 | 0.783  | 0.022  | 0.233  |
| 57 | pm2-pm23 | 0.007  | 0.451  | 0.018  | 0.363  | 0.003  | 0.796  |
| 58 | pm2-pm24 | 0.006  | 0.476  | -0.006 | 0.506  | -0.026 | 0.227  |
| 59 | pm2-pm25 | 0.006  | 0.544  | 0.002  | 0.851  | -0.013 | 0.302  |
| 60 | pm2-pm26 | -0.007 | 0.576  | 0.013  | 0.324  | 0.028  | 0.212  |
| 61 | pm2-pm27 | -0.001 | 0.616  | 0.015  | 0.384  | 0.021  | 0.217  |
| 62 | pm2-pm28 | -0.023 | 0.257  | -0.023 | 0.263  | 0.01   | 0.338  |
| 63 | pm2-pm29 | -0.001 | 0.77   | -0.019 | 0.326  | -0.003 | 0.768  |
| 64 | pm2-pm30 | 0.003  | 0.743  | 0.022  | 0.239  | -0.012 | 0.389  |
| 65 | pm2-pm31 | -0.466 | <0.001 | -0.48  | <0.001 | -0.473 | <0.001 |
| 66 | pm2-pm32 | 0.021  | 0.211  | 0.022  | 0.299  | -0.011 | 0.387  |
| 67 | pm2-pm33 | -0.016 | 0.313  | -0.001 | 0.897  | 0.012  | 0.314  |
| 68 | pm2-pm34 | -0.026 | 0.254  | -0.012 | 0.39   | -0.026 | 0.222  |
| 69 | pm2-pm35 | 0.012  | 0.364  | -0.004 | 0.953  | -0.005 | 0.679  |
| 70 | pm2-pm36 | 0.024  | 0.235  | -0.012 | 0.335  | 0.008  | 0.546  |
| 71 | pm2-pm37 | 0.005  | 0.492  | 0.013  | 0.384  | 0.024  | 0.256  |
| 72 | pm3-pm4  | 0.015  | 0.317  | 0.003  | 0.817  | -0.012 | 0.368  |
| 73 | pm3-pm5  | 0.017  | 0.341  | 0.016  | 0.305  | 0.021  | 0.252  |
| 74 | pm3-pm6  | 0.027  | 0.204  | 0.018  | 0.365  | -0.009 | 0.504  |
| 75 | pm3-pm7  | 0.03   | 0.245  | 0.046  | 0.168  | 0.001  | 0.825  |
| 76 | pm3-pm8  | 0.012  | 0.368  | 0.006  | 0.442  | -0.01  | 0.532  |
| 77 | pm3-pm9  | 0.016  | 0.38   | 0.042  | 0.188  | 0.031  | 0.257  |
| 78 | pm3-pm10 | -0.394 | <0.001 | -0.394 | <0.001 | -0.37  | <0.001 |

|     |          |        |        |        |        |        |        |
|-----|----------|--------|--------|--------|--------|--------|--------|
| 79  | pm3-pm11 | -0.02  | 0.304  | -0.007 | 0.541  | 0.016  | 0.377  |
| 80  | pm3-pm12 | 0.016  | 0.372  | 0.025  | 0.251  | 0.004  | 0.807  |
| 81  | pm3-pm13 | 0.02   | 0.298  | 0.022  | 0.237  | 0.03   | 0.286  |
| 82  | pm3-pm14 | -0.025 | 0.268  | -0.028 | 0.269  | -0.026 | 0.237  |
| 83  | pm3-pm15 | -0.066 | 0.028  | -0.063 | 0.044  | -0.067 | 0.031  |
| 84  | pm3-pm16 | -0.029 | 0.29   | -0.038 | 0.216  | -0.065 | 0.032  |
| 85  | pm3-pm17 | 0.005  | 0.618  | 0.007  | 0.416  | -0.001 | 0.982  |
| 86  | pm3-pm18 | 0      | 0.973  | 0.044  | 0.201  | 0      | 0.694  |
| 87  | pm3-pm19 | -0.018 | 0.328  | 0.004  | 0.946  | -0.006 | 0.477  |
| 88  | pm3-pm20 | -0.008 | 0.419  | 0.022  | 0.268  | 0.033  | 0.296  |
| 89  | pm3-pm21 | -0.388 | <0.001 | -0.404 | <0.001 | -0.378 | <0.001 |
| 90  | pm3-pm22 | -0.007 | 0.516  | -0.027 | 0.269  | -0.012 | 0.37   |
| 91  | pm3-pm23 | -0.01  | 0.546  | 0.009  | 0.414  | 0.034  | 0.225  |
| 92  | pm3-pm24 | -0.016 | 0.366  | 0.008  | 0.528  | -0.019 | 0.302  |
| 93  | pm3-pm25 | 0.002  | 0.736  | -0.001 | 0.934  | 0.005  | 0.508  |
| 94  | pm3-pm26 | 0.02   | 0.225  | 0.008  | 0.443  | 0.024  | 0.255  |
| 95  | pm3-pm27 | -0.011 | 0.332  | -0.007 | 0.571  | 0.013  | 0.335  |
| 96  | pm3-pm28 | 0.017  | 0.342  | 0.02   | 0.325  | -0.007 | 0.586  |
| 97  | pm3-pm29 | 0.02   | 0.342  | 0.02   | 0.355  | 0.02   | 0.347  |
| 98  | pm3-pm30 | 0.005  | 0.433  | 0.018  | 0.332  | 0.032  | 0.273  |
| 99  | pm3-pm31 | 0.015  | 0.378  | 0.05   | 0.17   | 0.048  | 0.18   |
| 100 | pm3-pm32 | -0.002 | 0.61   | -0.002 | 0.744  | -0.017 | 0.356  |
| 101 | pm3-pm33 | -0.009 | 0.507  | -0.039 | 0.254  | -0.03  | 0.284  |
| 102 | pm3-pm34 | -0.01  | 0.494  | 0.024  | 0.223  | 0.031  | 0.275  |
| 103 | pm3-pm35 | -0.478 | <0.001 | -0.443 | <0.001 | -0.472 | <0.001 |
| 104 | pm3-pm36 | -0.009 | 0.566  | 0.003  | 0.973  | -0.011 | 0.376  |
| 105 | pm3-pm37 | 0.029  | 0.294  | 0.019  | 0.303  | -0.004 | 0.903  |
| 106 | pm4-pm5  | 0.008  | 0.462  | 0.012  | 0.331  | 0.008  | 0.579  |
| 107 | pm4-pm6  | -0.017 | 0.324  | -0.016 | 0.386  | -0.007 | 0.44   |
| 108 | pm4-pm7  | -0.007 | 0.559  | -0.039 | 0.294  | -0.012 | 0.371  |



|     |          |        |        |        |        |        |        |
|-----|----------|--------|--------|--------|--------|--------|--------|
| 109 | pm4-pm8  | -0.032 | 0.209  | -0.019 | 0.388  | -0.017 | 0.304  |
| 110 | pm4-pm9  | 0.032  | 0.285  | 0.049  | 0.189  | 0.03   | 0.205  |
| 111 | pm4-pm10 | -0.38  | <0.001 | -0.36  | <0.001 | -0.365 | <0.001 |
| 112 | pm4-pm11 | 0.029  | 0.262  | 0.011  | 0.318  | 0.031  | 0.293  |
| 113 | pm4-pm12 | 0      | 0.996  | 0.003  | 0.869  | -0.016 | 0.375  |
| 114 | pm4-pm13 | -0.047 | 0.174  | -0.061 | 0.039  | -0.029 | 0.24   |
| 115 | pm4-pm14 | -0.031 | 0.21   | -0.023 | 0.258  | -0.019 | 0.378  |
| 116 | pm4-pm15 | -0.097 | 0.015  | -0.083 | 0.019  | -0.085 | 0.018  |
| 117 | pm4-pm16 | -0.048 | 0.163  | -0.04  | 0.189  | -0.054 | 0.038  |
| 118 | pm4-pm17 | 0.008  | 0.514  | 0.008  | 0.571  | -0.013 | 0.304  |
| 119 | pm4-pm18 | 0.015  | 0.324  | -0.013 | 0.346  | 0.03   | 0.261  |
| 120 | pm4-pm19 | -0.042 | 0.194  | -0.033 | 0.207  | -0.037 | 0.266  |
| 121 | pm4-pm20 | 0.009  | 0.528  | -0.016 | 0.339  | -0.005 | 0.53   |
| 122 | pm4-pm21 | -0.387 | <0.001 | -0.403 | <0.001 | -0.393 | <0.001 |
| 123 | pm4-pm22 | 0.018  | 0.326  | 0.033  | 0.21   | 0.045  | 0.167  |
| 124 | pm4-pm23 | 0.048  | 0.169  | 0.009  | 0.582  | 0.016  | 0.38   |
| 125 | pm4-pm24 | -0.006 | 0.427  | -0.007 | 0.52   | 0.011  | 0.361  |
| 126 | pm4-pm25 | 0.011  | 0.323  | -0.007 | 0.565  | -0.001 | 0.979  |
| 127 | pm4-pm26 | -0.009 | 0.482  | -0.005 | 0.532  | -0.018 | 0.304  |
| 128 | pm4-pm27 | -0.025 | 0.286  | 0.018  | 0.384  | -0.016 | 0.313  |
| 129 | pm4-pm28 | 0.006  | 0.431  | 0.016  | 0.385  | 0.028  | 0.292  |
| 130 | pm4-pm29 | 0      | 0.844  | -0.009 | 0.466  | -0.011 | 0.398  |
| 131 | pm4-pm30 | 0.042  | 0.181  | 0.001  | 0.791  | 0.033  | 0.272  |
| 132 | pm4-pm31 | 0.026  | 0.222  | 0.007  | 0.557  | 0.028  | 0.287  |
| 133 | pm4-pm32 | 0.008  | 0.428  | -0.022 | 0.237  | 0.012  | 0.396  |
| 134 | pm4-pm33 | 0      | 0.839  | -0.008 | 0.585  | -0.011 | 0.338  |
| 135 | pm4-pm34 | -0.008 | 0.423  | -0.022 | 0.292  | -0.03  | 0.271  |
| 136 | pm4-pm35 | -0.018 | 0.308  | -0.022 | 0.299  | 0.016  | 0.304  |
| 137 | pm4-pm36 | 0.005  | 0.826  | -0.007 | 0.432  | 0.001  | 0.662  |
| 138 | pm4-pm37 | 0.009  | 0.408  | 0.017  | 0.355  | 0.001  | 0.984  |

|     |          |        |        |        |        |        |        |
|-----|----------|--------|--------|--------|--------|--------|--------|
| 139 | pm5-pm6  | -0.025 | 0.283  | -0.012 | 0.356  | 0.015  | 0.317  |
| 140 | pm5-pm7  | -0.003 | 0.692  | -0.003 | 0.635  | -0.003 | 0.972  |
| 141 | pm5-pm8  | 0.033  | 0.2    | 0.006  | 0.459  | 0.008  | 0.463  |
| 142 | pm5-pm9  | -0.083 | 0.017  | -0.06  | 0.034  | -0.071 | 0.013  |
| 143 | pm5-pm10 | -0.383 | <0.001 | -0.381 | <0.001 | -0.382 | <0.001 |
| 144 | pm5-pm11 | 0.018  | 0.374  | 0.027  | 0.281  | 0.019  | 0.307  |
| 145 | pm5-pm12 | 0.023  | 0.274  | 0.017  | 0.4    | 0.007  | 0.554  |
| 146 | pm5-pm13 | 0.011  | 0.314  | -0.013 | 0.303  | 0.021  | 0.244  |
| 147 | pm5-pm14 | -0.029 | 0.21   | 0.003  | 0.953  | 0      | 0.827  |
| 148 | pm5-pm15 | -0.065 | 0.032  | -0.029 | 0.253  | -0.05  | 0.192  |
| 149 | pm5-pm16 | -0.1   | 0.006  | -0.075 | 0.011  | -0.079 | 0.015  |
| 150 | pm5-pm17 | -0.001 | 0.603  | 0.016  | 0.358  | 0.039  | 0.273  |
| 151 | pm5-pm18 | -0.059 | 0.038  | -0.077 | 0.013  | -0.059 | 0.034  |
| 152 | pm5-pm19 | 0.027  | 0.239  | -0.007 | 0.5    | -0.007 | 0.594  |
| 153 | pm5-pm20 | -0.018 | 0.337  | 0.004  | 0.693  | -0.016 | 0.375  |
| 154 | pm5-pm21 | -0.369 | <0.001 | -0.358 | <0.001 | -0.33  | <0.001 |
| 155 | pm5-pm22 | -0.006 | 0.482  | 0.018  | 0.3    | -0.001 | 0.795  |
| 156 | pm5-pm23 | 0.005  | 0.509  | 0.024  | 0.214  | 0.02   | 0.32   |
| 157 | pm5-pm24 | -0.029 | 0.224  | -0.022 | 0.249  | 0.002  | 0.983  |
| 158 | pm5-pm25 | -0.014 | 0.31   | 0.011  | 0.395  | -0.02  | 0.256  |
| 159 | pm5-pm26 | -0.02  | 0.269  | -0.01  | 0.44   | 0.014  | 0.319  |
| 160 | pm5-pm27 | 0.014  | 0.371  | -0.024 | 0.23   | -0.021 | 0.229  |
| 161 | pm5-pm28 | 0.005  | 0.843  | 0.017  | 0.379  | 0.001  | 0.976  |
| 162 | pm5-pm29 | 0.002  | 0.692  | -0.008 | 0.56   | -0.002 | 0.614  |
| 163 | pm5-pm30 | -0.041 | 0.151  | 0.006  | 0.503  | -0.021 | 0.274  |
| 164 | pm5-pm31 | 0.034  | 0.21   | 0.032  | 0.214  | -0.004 | 0.913  |
| 165 | pm5-pm32 | 0.005  | 0.588  | 0.025  | 0.274  | 0.023  | 0.297  |
| 166 | pm5-pm33 | 0.005  | 0.687  | -0.019 | 0.37   | 0.004  | 0.661  |
| 167 | pm5-pm34 | -0.007 | 0.483  | -0.022 | 0.266  | -0.049 | 0.153  |
| 168 | pm5-pm35 | -0.004 | 0.885  | 0.005  | 0.711  | 0.016  | 0.397  |

|     |          |        |        |        |        |        |        |
|-----|----------|--------|--------|--------|--------|--------|--------|
| 169 | pm5-pm36 | -0.004 | 0.918  | 0      | 0.875  | -0.024 | 0.211  |
| 170 | pm5-pm37 | -0.002 | 0.815  | 0.006  | 0.512  | -0.012 | 0.38   |
| 171 | pm6-pm7  | -0.05  | 0.031  | -0.018 | 0.335  | -0.022 | 0.245  |
| 172 | pm6-pm8  | 0.033  | 0.28   | 0.026  | 0.286  | 0.002  | 0.865  |
| 173 | pm6-pm9  | -0.443 | <0.001 | -0.444 | <0.001 | -0.461 | <0.001 |
| 174 | pm6-pm10 | -0.393 | <0.001 | -0.415 | <0.001 | -0.416 | <0.001 |
| 175 | pm6-pm11 | -0.021 | 0.256  | 0.007  | 0.518  | 0.001  | 0.794  |
| 176 | pm6-pm12 | 0.006  | 0.579  | 0.015  | 0.388  | -0.001 | 0.683  |
| 177 | pm6-pm13 | -0.06  | 0.045  | -0.058 | 0.023  | -0.049 | 0.173  |
| 178 | pm6-pm14 | 0.008  | 0.445  | -0.004 | 0.842  | 0.012  | 0.387  |
| 179 | pm6-pm15 | -0.081 | 0.013  | -0.084 | 0.013  | -0.043 | 0.198  |
| 180 | pm6-pm16 | -0.032 | 0.211  | -0.058 | 0.045  | -0.052 | 0.022  |
| 181 | pm6-pm17 | 0.014  | 0.308  | -0.009 | 0.559  | -0.015 | 0.387  |
| 182 | pm6-pm18 | 0.025  | 0.25   | 0.03   | 0.206  | 0.01   | 0.431  |
| 183 | pm6-pm19 | 0.012  | 0.318  | 0.009  | 0.451  | 0.019  | 0.327  |
| 184 | pm6-pm20 | 0.01   | 0.317  | 0.012  | 0.376  | 0.017  | 0.318  |
| 185 | pm6-pm21 | -0.373 | <0.001 | -0.368 | <0.001 | -0.354 | <0.001 |
| 186 | pm6-pm22 | 0.002  | 0.714  | 0.009  | 0.591  | -0.02  | 0.293  |
| 187 | pm6-pm23 | 0.011  | 0.321  | -0.013 | 0.39   | -0.01  | 0.51   |
| 188 | pm6-pm24 | 0.01   | 0.38   | -0.028 | 0.284  | 0.001  | 0.866  |
| 189 | pm6-pm25 | 0.019  | 0.322  | 0.007  | 0.444  | 0.022  | 0.235  |
| 190 | pm6-pm26 | -0.017 | 0.398  | -0.013 | 0.323  | -0.015 | 0.323  |
| 191 | pm6-pm27 | 0.037  | 0.264  | 0.013  | 0.321  | 0.025  | 0.276  |
| 192 | pm6-pm28 | -0.004 | 0.859  | 0.031  | 0.25   | 0.028  | 0.261  |
| 193 | pm6-pm29 | 0.013  | 0.331  | -0.024 | 0.239  | 0.017  | 0.394  |
| 194 | pm6-pm30 | 0.028  | 0.282  | -0.007 | 0.528  | 0.029  | 0.288  |
| 195 | pm6-pm31 | 0.041  | 0.175  | 0.045  | 0.186  | 0.033  | 0.216  |
| 196 | pm6-pm32 | -0.015 | 0.329  | 0.021  | 0.275  | -0.012 | 0.366  |
| 197 | pm6-pm33 | -0.019 | 0.31   | -0.025 | 0.206  | 0.017  | 0.357  |
| 198 | pm6-pm34 | -0.018 | 0.356  | -0.006 | 0.538  | -0.019 | 0.394  |

|     |          |        |        |        |        |        |        |
|-----|----------|--------|--------|--------|--------|--------|--------|
| 199 | pm6-pm35 | -0.017 | 0.379  | 0.001  | 0.943  | 0.015  | 0.395  |
| 200 | pm6-pm36 | -0.021 | 0.261  | -0.014 | 0.33   | 0.013  | 0.336  |
| 201 | pm6-pm37 | 0.017  | 0.334  | 0.019  | 0.348  | 0.004  | 0.645  |
| 202 | pm7-pm8  | 0.007  | 0.459  | -0.017 | 0.376  | -0.008 | 0.488  |
| 203 | pm7-pm9  | -0.425 | <0.001 | -0.432 | <0.001 | -0.462 | <0.001 |
| 204 | pm7-pm10 | 0.379  | <0.001 | 0.361  | <0.001 | 0.333  | <0.001 |
| 205 | pm7-pm11 | 0.004  | 0.749  | -0.01  | 0.488  | -0.004 | 0.967  |
| 206 | pm7-pm12 | -0.024 | 0.218  | -0.035 | 0.2    | -0.035 | 0.298  |
| 207 | pm7-pm13 | 0.195  | 0.005  | 0.147  | 0.007  | 0.155  | 0.003  |
| 208 | pm7-pm14 | 0.147  | 0.007  | 0.141  | 0.007  | 0.127  | 0.007  |
| 209 | pm7-pm15 | 0.045  | 0.17   | 0.035  | 0.247  | 0.028  | 0.253  |
| 210 | pm7-pm16 | -0.115 | 0.007  | -0.119 | 0.006  | -0.091 | 0.016  |
| 211 | pm7-pm17 | -0.006 | 0.592  | 0.002  | 0.929  | -0.006 | 0.597  |
| 212 | pm7-pm18 | -0.009 | 0.428  | -0.024 | 0.281  | -0.023 | 0.204  |
| 213 | pm7-pm19 | -0.066 | 0.037  | -0.034 | 0.22   | -0.063 | 0.036  |
| 214 | pm7-pm20 | -0.013 | 0.346  | 0.006  | 0.532  | -0.013 | 0.39   |
| 215 | pm7-pm21 | 0.405  | <0.001 | 0.434  | <0.001 | 0.359  | <0.001 |
| 216 | pm7-pm22 | -0.252 | <0.001 | -0.292 | <0.001 | -0.293 | <0.001 |
| 217 | pm7-pm23 | -0.248 | <0.001 | -0.253 | <0.001 | -0.23  | <0.001 |
| 218 | pm7-pm24 | -0.182 | 0.002  | -0.196 | 0.003  | -0.202 | <0.001 |
| 219 | pm7-pm25 | -0.25  | <0.001 | -0.275 | <0.001 | -0.27  | <0.001 |
| 220 | pm7-pm26 | -0.314 | <0.001 | -0.314 | <0.001 | -0.274 | <0.001 |
| 221 | pm7-pm27 | -0.222 | <0.001 | -0.236 | <0.001 | -0.213 | <0.001 |
| 222 | pm7-pm28 | -0.2   | 0.003  | -0.21  | <0.001 | -0.196 | 0.002  |
| 223 | pm7-pm29 | -0.207 | <0.001 | -0.216 | <0.001 | -0.207 | <0.001 |
| 224 | pm7-pm30 | -0.249 | <0.001 | -0.222 | <0.001 | -0.254 | <0.001 |
| 225 | pm7-pm31 | -0.177 | 0.002  | -0.204 | <0.001 | -0.2   | 0.002  |
| 226 | pm7-pm32 | -0.21  | <0.001 | -0.19  | 0.004  | -0.215 | <0.001 |
| 227 | pm7-pm33 | -0.252 | <0.001 | -0.287 | <0.001 | -0.248 | <0.001 |
| 228 | pm7-pm34 | -0.209 | <0.001 | -0.179 | 0.005  | -0.182 | 0.002  |

|     |          |        |        |        |        |        |        |
|-----|----------|--------|--------|--------|--------|--------|--------|
| 229 | pm7-pm35 | -0.14  | 0.01   | -0.144 | 0.009  | -0.167 | 0.003  |
| 230 | pm7-pm36 | -0.19  | 0.004  | -0.198 | 0.004  | -0.203 | <0.001 |
| 231 | pm7-pm37 | -0.257 | <0.001 | -0.24  | <0.001 | -0.263 | <0.001 |
| 232 | pm8-pm9  | 0.017  | 0.358  | 0.011  | 0.379  | -0.008 | 0.421  |
| 233 | pm8-pm10 | -0.603 | <0.001 | -0.591 | <0.001 | -0.626 | <0.001 |
| 234 | pm8-pm11 | 0.003  | 0.836  | 0.008  | 0.483  | 0.006  | 0.436  |
| 235 | pm8-pm12 | -0.012 | 0.337  | -0.003 | 0.814  | 0.027  | 0.247  |
| 236 | pm8-pm13 | -0.016 | 0.395  | 0.007  | 0.489  | -0.018 | 0.366  |
| 237 | pm8-pm14 | -0.021 | 0.252  | -0.014 | 0.326  | -0.043 | 0.198  |
| 238 | pm8-pm15 | -0.076 | 0.016  | -0.098 | 0.019  | -0.061 | 0.029  |
| 239 | pm8-pm16 | -0.062 | 0.023  | -0.038 | 0.28   | -0.05  | 0.176  |
| 240 | pm8-pm17 | 0.022  | 0.287  | 0.003  | 0.798  | 0.039  | 0.233  |
| 241 | pm8-pm18 | 0.015  | 0.341  | 0.015  | 0.346  | 0.001  | 0.913  |
| 242 | pm8-pm19 | -0.021 | 0.257  | 0.007  | 0.472  | -0.033 | 0.209  |
| 243 | pm8-pm20 | 0.002  | 0.856  | 0.004  | 0.75   | 0.001  | 0.736  |
| 244 | pm8-pm21 | -0.576 | <0.001 | -0.536 | <0.001 | -0.562 | <0.001 |
| 245 | pm8-pm22 | -0.463 | <0.001 | -0.463 | <0.001 | -0.443 | <0.001 |
| 246 | pm8-pm23 | 0.001  | 0.652  | 0.008  | 0.518  | -0.017 | 0.394  |
| 247 | pm8-pm24 | 0      | 0.808  | 0.024  | 0.255  | -0.002 | 0.766  |
| 248 | pm8-pm25 | 0.003  | 0.71   | -0.016 | 0.329  | 0.016  | 0.337  |
| 249 | pm8-pm26 | -0.009 | 0.504  | -0.018 | 0.33   | -0.025 | 0.266  |
| 250 | pm8-pm27 | 0.001  | 0.99   | 0.047  | 0.201  | 0.005  | 0.481  |
| 251 | pm8-pm28 | -0.014 | 0.352  | 0.008  | 0.422  | 0.012  | 0.382  |
| 252 | pm8-pm29 | 0.019  | 0.399  | 0.009  | 0.569  | 0.025  | 0.275  |
| 253 | pm8-pm30 | 0.026  | 0.282  | 0.005  | 0.502  | 0.022  | 0.219  |
| 254 | pm8-pm31 | -0.446 | <0.001 | -0.473 | <0.001 | -0.447 | <0.001 |
| 255 | pm8-pm32 | 0.024  | 0.222  | -0.013 | 0.397  | 0.022  | 0.232  |
| 256 | pm8-pm33 | -0.036 | 0.232  | -0.007 | 0.405  | -0.029 | 0.265  |
| 257 | pm8-pm34 | -0.022 | 0.252  | -0.004 | 0.764  | 0.012  | 0.396  |
| 258 | pm8-pm35 | -0.025 | 0.2    | 0.003  | 0.706  | -0.002 | 1      |

|     |          |        |        |        |        |        |        |
|-----|----------|--------|--------|--------|--------|--------|--------|
| 259 | pm8-pm36 | -0.015 | 0.391  | 0.016  | 0.327  | 0.027  | 0.245  |
| 260 | pm8-pm37 | 0.032  | 0.291  | 0.017  | 0.398  | 0.029  | 0.244  |
| 261 | pm9-pm10 | -0.605 | <0.001 | -0.612 | <0.001 | -0.585 | <0.001 |
| 262 | pm9-pm11 | -0.449 | <0.001 | -0.442 | <0.001 | -0.459 | <0.001 |
| 263 | pm9-pm12 | -0.453 | <0.001 | -0.46  | <0.001 | -0.473 | <0.001 |
| 264 | pm9-pm13 | -0.001 | 0.745  | -0.01  | 0.444  | 0.016  | 0.34   |
| 265 | pm9-pm14 | -0.012 | 0.312  | -0.002 | 0.985  | -0.011 | 0.352  |
| 266 | pm9-pm15 | -0.03  | 0.222  | -0.055 | 0.033  | -0.029 | 0.245  |
| 267 | pm9-pm16 | -0.044 | 0.167  | -0.011 | 0.385  | -0.025 | 0.263  |
| 268 | pm9-pm17 | 0.039  | 0.234  | 0.025  | 0.221  | 0.028  | 0.295  |
| 269 | pm9-pm18 | -0.141 | 0.006  | -0.181 | 0.003  | -0.165 | 0.004  |
| 270 | pm9-pm19 | -0.177 | 0.004  | -0.169 | 0.005  | -0.146 | 0.007  |
| 271 | pm9-pm20 | 0.013  | 0.381  | 0.011  | 0.301  | 0.017  | 0.32   |
| 272 | pm9-pm21 | -0.497 | <0.001 | -0.493 | <0.001 | -0.493 | <0.001 |
| 273 | pm9-pm22 | 0.014  | 0.304  | 0.016  | 0.318  | 0.043  | 0.192  |
| 274 | pm9-pm23 | -0.021 | 0.205  | -0.013 | 0.327  | -0.021 | 0.252  |
| 275 | pm9-pm24 | 0.042  | 0.199  | 0.028  | 0.266  | 0.031  | 0.258  |
| 276 | pm9-pm25 | -0.463 | <0.001 | -0.471 | <0.001 | -0.472 | <0.001 |
| 277 | pm9-pm26 | 0.023  | 0.254  | 0.03   | 0.242  | 0.046  | 0.166  |
| 278 | pm9-pm27 | -0.459 | <0.001 | -0.466 | <0.001 | -0.462 | <0.001 |
| 279 | pm9-pm28 | -0.076 | 0.011  | -0.076 | 0.019  | -0.06  | 0.034  |
| 280 | pm9-pm29 | 0.006  | 0.562  | -0.007 | 0.506  | 0.019  | 0.323  |
| 281 | pm9-pm30 | -0.444 | <0.001 | -0.43  | <0.001 | -0.435 | <0.001 |
| 282 | pm9-pm31 | 0.029  | 0.211  | 0.002  | 0.792  | 0.035  | 0.258  |
| 283 | pm9-pm32 | 0.022  | 0.245  | 0.012  | 0.371  | 0.041  | 0.16   |
| 284 | pm9-pm33 | -0.017 | 0.378  | 0.013  | 0.311  | -0.024 | 0.286  |
| 285 | pm9-pm34 | -0.042 | 0.196  | -0.005 | 0.919  | 0      | 0.668  |
| 286 | pm9-pm35 | 0.046  | 0.2    | 0.043  | 0.164  | 0.017  | 0.358  |
| 287 | pm9-pm36 | -0.479 | <0.001 | -0.473 | <0.001 | -0.45  | <0.001 |
| 288 | pm9-pm37 | 0.021  | 0.228  | 0.021  | 0.217  | 0.006  | 0.424  |

|     |           |        |        |        |        |        |        |
|-----|-----------|--------|--------|--------|--------|--------|--------|
| 289 | pm10-pm11 | -0.365 | <0.001 | -0.353 | <0.001 | -0.362 | <0.001 |
| 290 | pm10-pm12 | -0.392 | <0.001 | -0.391 | <0.001 | -0.372 | <0.001 |
| 291 | pm10-pm13 | -0.442 | <0.001 | -0.435 | <0.001 | -0.429 | <0.001 |
| 292 | pm10-pm14 | 0.144  | 0.009  | 0.166  | 0.003  | 0.095  | 0.017  |
| 293 | pm10-pm15 | -0.424 | <0.001 | -0.422 | <0.001 | -0.447 | <0.001 |
| 294 | pm10-pm16 | 0.01   | 0.368  | 0.032  | 0.218  | 0.012  | 0.326  |
| 295 | pm10-pm17 | -0.324 | <0.001 | -0.332 | <0.001 | -0.337 | <0.001 |
| 296 | pm10-pm18 | -0.421 | <0.001 | -0.444 | <0.001 | -0.415 | <0.001 |
| 297 | pm10-pm19 | -0.418 | <0.001 | -0.434 | <0.001 | -0.416 | <0.001 |
| 298 | pm10-pm20 | -0.38  | <0.001 | -0.386 | <0.001 | -0.404 | <0.001 |
| 299 | pm10-pm21 | -0.213 | <0.001 | -0.213 | <0.001 | -0.232 | <0.001 |
| 300 | pm10-pm22 | -0.178 | 0.003  | -0.144 | 0.009  | -0.148 | 0.005  |
| 301 | pm10-pm23 | -0.425 | <0.001 | -0.392 | <0.001 | -0.378 | <0.001 |
| 302 | pm10-pm24 | -0.437 | <0.001 | -0.434 | <0.001 | -0.405 | <0.001 |
| 303 | pm10-pm25 | -0.38  | <0.001 | -0.401 | <0.001 | -0.372 | <0.001 |
| 304 | pm10-pm26 | -0.128 | 0.008  | -0.151 | 0.001  | -0.141 | 0.009  |
| 305 | pm10-pm27 | -0.405 | <0.001 | -0.381 | <0.001 | -0.382 | <0.001 |
| 306 | pm10-pm28 | -0.387 | <0.001 | -0.378 | <0.001 | -0.365 | <0.001 |
| 307 | pm10-pm29 | -0.408 | <0.001 | -0.438 | <0.001 | -0.402 | <0.001 |
| 308 | pm10-pm30 | -0.433 | <0.001 | -0.437 | <0.001 | -0.463 | <0.001 |
| 309 | pm10-pm31 | -0.378 | <0.001 | -0.375 | <0.001 | -0.406 | <0.001 |
| 310 | pm10-pm32 | -0.415 | <0.001 | -0.44  | <0.001 | -0.394 | <0.001 |
| 311 | pm10-pm33 | -0.42  | <0.001 | -0.393 | <0.001 | -0.402 | <0.001 |
| 312 | pm10-pm34 | -0.381 | <0.001 | -0.412 | <0.001 | -0.399 | <0.001 |
| 313 | pm10-pm35 | -0.394 | <0.001 | -0.394 | <0.001 | -0.428 | <0.001 |
| 314 | pm10-pm36 | -0.44  | <0.001 | -0.444 | <0.001 | -0.455 | <0.001 |
| 315 | pm10-pm37 | -0.39  | <0.001 | -0.405 | <0.001 | -0.434 | <0.001 |
| 316 | pm11-pm12 | -0.02  | 0.241  | 0.014  | 0.346  | 0.015  | 0.358  |
| 317 | pm11-pm13 | 0.015  | 0.376  | -0.016 | 0.361  | -0.005 | 0.664  |
| 318 | pm11-pm14 | -0.038 | 0.246  | 0.006  | 0.49   | -0.04  | 0.232  |

|     |           |        |        |        |        |        |        |
|-----|-----------|--------|--------|--------|--------|--------|--------|
| 319 | pm11-pm15 | -0.076 | 0.018  | -0.073 | 0.02   | -0.078 | 0.015  |
| 320 | pm11-pm16 | -0.053 | 0.036  | -0.009 | 0.522  | -0.042 | 0.158  |
| 321 | pm11-pm17 | 0.029  | 0.218  | 0.015  | 0.386  | -0.008 | 0.45   |
| 322 | pm11-pm18 | 0.017  | 0.355  | 0.024  | 0.206  | 0.01   | 0.335  |
| 323 | pm11-pm19 | -0.003 | 0.85   | 0.014  | 0.345  | -0.005 | 0.652  |
| 324 | pm11-pm20 | 0.015  | 0.305  | 0.007  | 0.593  | 0.001  | 0.6    |
| 325 | pm11-pm21 | -0.387 | <0.001 | -0.368 | <0.001 | -0.371 | <0.001 |
| 326 | pm11-pm22 | 0.048  | 0.2    | 0.034  | 0.257  | 0.032  | 0.247  |
| 327 | pm11-pm23 | 0.044  | 0.191  | 0      | 0.973  | 0.006  | 0.576  |
| 328 | pm11-pm24 | 0.003  | 0.933  | -0.021 | 0.214  | -0.001 | 0.781  |
| 329 | pm11-pm25 | -0.015 | 0.37   | 0.015  | 0.305  | -0.004 | 0.638  |
| 330 | pm11-pm26 | -0.011 | 0.393  | -0.017 | 0.376  | -0.013 | 0.359  |
| 331 | pm11-pm27 | 0.024  | 0.284  | 0.028  | 0.258  | 0.007  | 0.534  |
| 332 | pm11-pm28 | 0.027  | 0.216  | 0.001  | 0.852  | -0.001 | 0.696  |
| 333 | pm11-pm29 | -0.022 | 0.3    | -0.033 | 0.235  | -0.007 | 0.459  |
| 334 | pm11-pm30 | 0.023  | 0.214  | 0.008  | 0.521  | 0.022  | 0.259  |
| 335 | pm11-pm31 | -0.002 | 0.988  | 0.027  | 0.229  | 0.016  | 0.306  |
| 336 | pm11-pm32 | 0.004  | 0.795  | -0.007 | 0.556  | -0.003 | 0.808  |
| 337 | pm11-pm33 | -0.019 | 0.308  | 0.017  | 0.3    | 0.025  | 0.233  |
| 338 | pm11-pm34 | -0.046 | 0.164  | -0.031 | 0.28   | -0.053 | 0.036  |
| 339 | pm11-pm35 | -0.003 | 0.651  | 0.019  | 0.331  | 0.032  | 0.233  |
| 340 | pm11-pm36 | 0.016  | 0.309  | -0.013 | 0.358  | -0.015 | 0.316  |
| 341 | pm11-pm37 | -0.011 | 0.363  | 0.004  | 0.948  | 0.005  | 0.963  |
| 342 | pm12-pm13 | -0.017 | 0.348  | -0.047 | 0.165  | -0.036 | 0.201  |
| 343 | pm12-pm14 | 0.019  | 0.368  | 0.001  | 0.736  | 0.014  | 0.367  |
| 344 | pm12-pm15 | -0.065 | 0.021  | -0.08  | 0.012  | -0.093 | 0.012  |
| 345 | pm12-pm16 | -0.065 | 0.028  | -0.041 | 0.197  | -0.054 | 0.024  |
| 346 | pm12-pm17 | -0.004 | 0.838  | 0.008  | 0.479  | 0.018  | 0.365  |
| 347 | pm12-pm18 | -0.004 | 0.675  | 0.002  | 0.651  | -0.024 | 0.252  |
| 348 | pm12-pm19 | -0.008 | 0.53   | 0.002  | 0.709  | 0.022  | 0.298  |



|     |           |        |        |        |        |        |        |
|-----|-----------|--------|--------|--------|--------|--------|--------|
| 349 | pm12-pm20 | 0.023  | 0.272  | 0.02   | 0.295  | 0.021  | 0.265  |
| 350 | pm12-pm21 | -0.386 | <0.001 | -0.4   | <0.001 | -0.375 | <0.001 |
| 351 | pm12-pm22 | 0.029  | 0.231  | 0.019  | 0.364  | -0.007 | 0.479  |
| 352 | pm12-pm23 | 0.007  | 0.503  | 0.027  | 0.272  | 0.034  | 0.244  |
| 353 | pm12-pm24 | 0.003  | 0.688  | 0.02   | 0.377  | 0.02   | 0.336  |
| 354 | pm12-pm25 | -0.01  | 0.524  | 0.002  | 0.683  | 0.021  | 0.247  |
| 355 | pm12-pm26 | -0.013 | 0.398  | -0.01  | 0.419  | 0.009  | 0.592  |
| 356 | pm12-pm27 | 0.019  | 0.34   | 0.008  | 0.405  | 0.018  | 0.305  |
| 357 | pm12-pm28 | 0.009  | 0.465  | 0.022  | 0.234  | -0.016 | 0.343  |
| 358 | pm12-pm29 | -0.004 | 0.976  | 0.03   | 0.259  | 0.021  | 0.224  |
| 359 | pm12-pm30 | -0.251 | <0.001 | -0.27  | <0.001 | -0.255 | <0.001 |
| 360 | pm12-pm31 | -0.01  | 0.361  | -0.005 | 0.446  | -0.01  | 0.434  |
| 361 | pm12-pm32 | 0.027  | 0.229  | 0.016  | 0.349  | -0.002 | 0.895  |
| 362 | pm12-pm33 | 0.001  | 0.689  | 0.002  | 0.662  | -0.028 | 0.238  |
| 363 | pm12-pm34 | -0.031 | 0.274  | -0.016 | 0.31   | -0.046 | 0.161  |
| 364 | pm12-pm35 | -0.002 | 0.955  | -0.007 | 0.475  | -0.028 | 0.295  |
| 365 | pm12-pm36 | 0.033  | 0.231  | 0.017  | 0.363  | 0.027  | 0.232  |
| 366 | pm12-pm37 | -0.012 | 0.357  | 0.017  | 0.346  | 0.021  | 0.24   |
| 367 | pm13-pm14 | 0.022  | 0.154  | 0.019  | 0.252  | 0.0180 | 0.341  |
| 368 | pm13-pm15 | -0.101 | 0.01   | -0.137 | 0.01   | -0.129 | 0.009  |
| 369 | pm13-pm16 | -0.098 | 0.015  | -0.05  | 0.184  | -0.071 | 0.015  |
| 370 | pm13-pm17 | -0.119 | 0.007  | -0.077 | 0.016  | -0.082 | 0.017  |
| 371 | pm13-pm18 | -0.012 | 0.348  | -0.016 | 0.376  | -0.056 | 0.043  |
| 372 | pm13-pm19 | -0.009 | 0.478  | 0.016  | 0.399  | -0.025 | 0.268  |
| 373 | pm13-pm20 | -0.048 | 0.2    | -0.013 | 0.326  | -0.009 | 0.594  |
| 374 | pm13-pm21 | -0.407 | <0.001 | -0.388 | <0.001 | -0.378 | <0.001 |
| 375 | pm13-pm22 | 0.007  | 0.572  | -0.034 | 0.252  | -0.023 | 0.292  |
| 376 | pm13-pm23 | -0.037 | 0.23   | -0.046 | 0.167  | -0.015 | 0.386  |
| 377 | pm13-pm24 | -0.011 | 0.313  | -0.004 | 0.97   | -0.047 | 0.167  |
| 378 | pm13-pm25 | -0.029 | 0.208  | -0.028 | 0.284  | -0.03  | 0.272  |

|     |           |        |        |        |        |        |        |
|-----|-----------|--------|--------|--------|--------|--------|--------|
| 379 | pm13-pm26 | -0.024 | 0.214  | -0.013 | 0.33   | -0.037 | 0.251  |
| 380 | pm13-pm27 | -0.01  | 0.4    | -0.048 | 0.159  | -0.043 | 0.178  |
| 381 | pm13-pm28 | -0.026 | 0.283  | -0.022 | 0.226  | -0.017 | 0.309  |
| 382 | pm13-pm29 | -0.054 | 0.026  | -0.071 | 0.012  | -0.076 | 0.013  |
| 383 | pm13-pm30 | -0.034 | 0.253  | -0.057 | 0.023  | -0.036 | 0.246  |
| 384 | pm13-pm31 | -0.029 | 0.289  | -0.032 | 0.243  | -0.003 | 0.725  |
| 385 | pm13-pm32 | 0.015  | 0.351  | 0.008  | 0.442  | 0.008  | 0.477  |
| 386 | pm13-pm33 | 0      | 0.901  | -0.019 | 0.333  | 0.005  | 0.729  |
| 387 | pm13-pm34 | -0.045 | 0.161  | -0.042 | 0.2    | -0.029 | 0.232  |
| 388 | pm13-pm35 | -0.034 | 0.298  | -0.014 | 0.335  | -0.032 | 0.23   |
| 389 | pm13-pm36 | -0.038 | 0.217  | -0.003 | 0.747  | -0.046 | 0.177  |
| 390 | pm13-pm37 | -0.032 | 0.259  | -0.03  | 0.224  | -0.016 | 0.328  |
| 391 | pm14-pm15 | -0.118 | 0.008  | -0.08  | 0.011  | -0.085 | 0.019  |
| 392 | pm14-pm16 | -0.129 | 0.006  | -0.127 | 0.01   | -0.138 | 0.005  |
| 393 | pm14-pm17 | -0.054 | 0.035  | -0.022 | 0.276  | -0.022 | 0.264  |
| 394 | pm14-pm18 | -0.026 | 0.263  | -0.035 | 0.29   | -0.032 | 0.278  |
| 395 | pm14-pm19 | -0.041 | 0.194  | -0.012 | 0.342  | -0.011 | 0.362  |
| 396 | pm14-pm20 | -0.014 | 0.358  | -0.002 | 0.914  | -0.003 | 0.7    |
| 397 | pm14-pm21 | -0.421 | <0.001 | -0.422 | <0.001 | -0.415 | <0.001 |
| 398 | pm14-pm22 | -0.014 | 0.313  | -0.014 | 0.333  | 0.007  | 0.478  |
| 399 | pm14-pm23 | -0.006 | 0.427  | -0.01  | 0.325  | -0.014 | 0.357  |
| 400 | pm14-pm24 | 0.012  | 0.305  | -0.021 | 0.266  | 0.002  | 0.693  |
| 401 | pm14-pm25 | 0.013  | 0.388  | 0.022  | 0.24   | 0.024  | 0.299  |
| 402 | pm14-pm26 | -0.024 | 0.283  | -0.032 | 0.287  | -0.033 | 0.21   |
| 403 | pm14-pm27 | -0.016 | 0.314  | -0.042 | 0.163  | -0.027 | 0.233  |
| 404 | pm14-pm28 | 0.004  | 0.622  | 0.005  | 0.785  | 0.028  | 0.238  |
| 405 | pm14-pm29 | -0.016 | 0.32   | -0.023 | 0.245  | -0.041 | 0.198  |
| 406 | pm14-pm30 | 0.002  | 0.866  | -0.017 | 0.368  | -0.012 | 0.38   |
| 407 | pm14-pm31 | -0.019 | 0.308  | -0.002 | 0.825  | -0.036 | 0.208  |
| 408 | pm14-pm32 | -0.034 | 0.223  | -0.018 | 0.306  | -0.052 | 0.039  |

|     |           |        |        |        |        |        |        |
|-----|-----------|--------|--------|--------|--------|--------|--------|
| 409 | pm14-pm33 | -0.002 | 0.926  | -0.004 | 0.754  | -0.017 | 0.323  |
| 410 | pm14-pm34 | 0.009  | 0.56   | -0.007 | 0.531  | -0.025 | 0.292  |
| 411 | pm14-pm35 | -0.035 | 0.205  | -0.024 | 0.286  | -0.015 | 0.381  |
| 412 | pm14-pm36 | 0.002  | 0.812  | 0.012  | 0.357  | -0.01  | 0.599  |
| 413 | pm14-pm37 | 0.037  | 0.241  | 0.012  | 0.34   | 0.006  | 0.535  |
| 414 | pm15-pm16 | -0.146 | 0.005  | -0.143 | 0.009  | -0.108 | 0.009  |
| 415 | pm15-pm17 | -0.084 | 0.012  | -0.111 | 0.009  | -0.084 | 0.014  |
| 416 | pm15-pm18 | -0.044 | 0.176  | -0.044 | 0.167  | -0.035 | 0.222  |
| 417 | pm15-pm19 | -0.042 | 0.191  | -0.072 | 0.012  | -0.054 | 0.023  |
| 418 | pm15-pm20 | -0.052 | 0.043  | -0.067 | 0.024  | -0.057 | 0.042  |
| 419 | pm15-pm21 | -0.381 | <0.001 | -0.365 | <0.001 | -0.357 | <0.001 |
| 420 | pm15-pm22 | -0.065 | 0.021  | -0.076 | 0.019  | -0.053 | 0.022  |
| 421 | pm15-pm23 | -0.111 | 0.008  | -0.085 | 0.014  | -0.116 | 0.009  |
| 422 | pm15-pm24 | -0.044 | 0.188  | -0.044 | 0.161  | -0.087 | 0.01   |
| 423 | pm15-pm25 | -0.064 | 0.042  | -0.053 | 0.041  | -0.045 | 0.151  |
| 424 | pm15-pm26 | -0.038 | 0.242  | -0.055 | 0.034  | -0.075 | 0.013  |
| 425 | pm15-pm27 | -0.075 | 0.018  | -0.04  | 0.157  | -0.059 | 0.037  |
| 426 | pm15-pm28 | -0.087 | 0.017  | -0.085 | 0.014  | -0.111 | 0.007  |
| 427 | pm15-pm29 | -0.092 | 0.015  | -0.103 | 0.006  | -0.096 | 0.019  |
| 428 | pm15-pm30 | -0.034 | 0.218  | -0.042 | 0.199  | -0.026 | 0.263  |
| 429 | pm15-pm31 | -0.049 | 0.154  | -0.071 | 0.019  | -0.054 | 0.033  |
| 430 | pm15-pm32 | -0.102 | 0.006  | -0.067 | 0.028  | -0.061 | 0.034  |
| 431 | pm15-pm33 | -0.094 | 0.018  | -0.067 | 0.043  | -0.058 | 0.03   |
| 432 | pm15-pm34 | -0.064 | 0.045  | -0.058 | 0.034  | -0.045 | 0.173  |
| 433 | pm15-pm35 | -0.095 | 0.011  | -0.082 | 0.012  | -0.064 | 0.021  |
| 434 | pm15-pm36 | -0.04  | 0.163  | -0.061 | 0.027  | -0.063 | 0.02   |
| 435 | pm15-pm37 | -0.064 | 0.036  | -0.054 | 0.038  | -0.07  | 0.027  |
| 436 | pm16-pm17 | 0.235  | <0.001 | 0.256  | <0.001 | 0.192  | 0.001  |
| 437 | pm16-pm18 | -0.048 | 0.161  | -0.057 | 0.044  | -0.048 | 0.186  |
| 438 | pm16-pm19 | -0.096 | 0.012  | -0.068 | 0.038  | -0.075 | 0.014  |

|     |           |        |        |        |        |        |        |
|-----|-----------|--------|--------|--------|--------|--------|--------|
| 439 | pm16-pm20 | -0.098 | 0.019  | -0.064 | 0.033  | -0.075 | 0.016  |
| 440 | pm16-pm21 | -0.38  | <0.001 | -0.357 | <0.001 | -0.371 | <0.001 |
| 441 | pm16-pm22 | -0.023 | 0.267  | -0.036 | 0.217  | -0.056 | 0.03   |
| 442 | pm16-pm23 | -0.083 | 0.01   | -0.061 | 0.036  | -0.081 | 0.015  |
| 443 | pm16-pm24 | -0.093 | 0.02   | -0.082 | 0.01   | -0.103 | 0.008  |
| 444 | pm16-pm25 | -0.065 | 0.035  | -0.072 | 0.016  | -0.028 | 0.255  |
| 445 | pm16-pm26 | -0.062 | 0.031  | -0.033 | 0.281  | -0.053 | 0.045  |
| 446 | pm16-pm27 | -0.062 | 0.043  | -0.051 | 0.029  | -0.081 | 0.015  |
| 447 | pm16-pm28 | -0.058 | 0.042  | -0.068 | 0.021  | -0.088 | 0.019  |
| 448 | pm16-pm29 | -0.072 | 0.018  | -0.051 | 0.03   | -0.07  | 0.015  |
| 449 | pm16-pm30 | -0.09  | 0.017  | -0.091 | 0.015  | -0.098 | 0.014  |
| 450 | pm16-pm31 | -0.024 | 0.257  | -0.011 | 0.345  | -0.011 | 0.38   |
| 451 | pm16-pm32 | -0.1   | 0.008  | -0.072 | 0.011  | -0.085 | 0.018  |
| 452 | pm16-pm33 | -0.021 | 0.221  | -0.03  | 0.294  | -0.017 | 0.333  |
| 453 | pm16-pm34 | -0.061 | 0.022  | -0.077 | 0.013  | -0.088 | 0.018  |
| 454 | pm16-pm35 | -0.052 | 0.042  | -0.071 | 0.017  | -0.056 | 0.028  |
| 455 | pm16-pm36 | -0.05  | 0.032  | -0.095 | 0.015  | -0.084 | 0.014  |
| 456 | pm16-pm37 | -0.05  | 0.18   | -0.093 | 0.018  | -0.08  | 0.018  |
| 457 | pm17-pm18 | 0.041  | 0.164  | 0.03   | 0.226  | 0.028  | 0.258  |
| 458 | pm17-pm19 | -0.007 | 0.452  | -0.001 | 0.991  | -0.002 | 0.889  |
| 459 | pm17-pm20 | -0.046 | 0.163  | -0.023 | 0.289  | -0.001 | 0.918  |
| 460 | pm17-pm21 | -0.273 | <0.001 | -0.255 | <0.001 | -0.244 | <0.001 |
| 461 | pm17-pm22 | 0.016  | 0.366  | 0.022  | 0.223  | 0.031  | 0.287  |
| 462 | pm17-pm23 | -0.012 | 0.327  | -0.018 | 0.32   | 0.007  | 0.43   |
| 463 | pm17-pm24 | -0.019 | 0.358  | 0.006  | 0.529  | -0.016 | 0.356  |
| 464 | pm17-pm25 | 0.038  | 0.263  | 0.033  | 0.234  | 0.015  | 0.39   |
| 465 | pm17-pm26 | -0.033 | 0.291  | -0.035 | 0.271  | -0.034 | 0.274  |
| 466 | pm17-pm27 | -0.043 | 0.2    | -0.048 | 0.18   | -0.029 | 0.22   |
| 467 | pm17-pm28 | -0.011 | 0.347  | 0.027  | 0.269  | 0.002  | 0.957  |
| 468 | pm17-pm29 | 0.034  | 0.253  | 0.003  | 0.825  | 0.008  | 0.519  |

|     |           |        |        |        |        |        |        |
|-----|-----------|--------|--------|--------|--------|--------|--------|
| 469 | pm17-pm30 | -0.025 | 0.259  | -0.018 | 0.365  | 0.014  | 0.369  |
| 470 | pm17-pm31 | -0.025 | 0.282  | -0.023 | 0.246  | -0.013 | 0.328  |
| 471 | pm17-pm32 | -0.045 | 0.154  | -0.041 | 0.176  | -0.008 | 0.517  |
| 472 | pm17-pm33 | -0.012 | 0.381  | 0.01   | 0.429  | -0.011 | 0.32   |
| 473 | pm17-pm34 | -0.018 | 0.309  | -0.003 | 0.657  | -0.031 | 0.297  |
| 474 | pm17-pm35 | 0.026  | 0.227  | 0.02   | 0.318  | 0.026  | 0.26   |
| 475 | pm17-pm36 | -0.036 | 0.209  | -0.037 | 0.292  | 0.007  | 0.504  |
| 476 | pm17-pm37 | 0.026  | 0.245  | 0.014  | 0.35   | 0.001  | 0.683  |
| 477 | pm18-pm19 | 0.035  | 0.239  | 0.004  | 0.969  | 0.021  | 0.226  |
| 478 | pm18-pm20 | 0      | 0.803  | 0.005  | 0.438  | -0.004 | 0.934  |
| 479 | pm18-pm21 | -0.353 | <0.001 | -0.379 | <0.001 | -0.354 | <0.001 |
| 480 | pm18-pm22 | -0.443 | <0.001 | -0.465 | <0.001 | -0.462 | <0.001 |
| 481 | pm18-pm23 | 0.04   | 0.163  | 0.032  | 0.231  | 0.031  | 0.26   |
| 482 | pm18-pm24 | -0.473 | <0.001 | -0.49  | <0.001 | -0.454 | <0.001 |
| 483 | pm18-pm25 | 0.045  | 0.196  | 0.022  | 0.21   | 0.028  | 0.209  |
| 484 | pm18-pm26 | 0.033  | 0.268  | 0.026  | 0.294  | 0.016  | 0.362  |
| 485 | pm18-pm27 | 0.026  | 0.292  | 0.022  | 0.223  | 0.03   | 0.207  |
| 486 | pm18-pm28 | 0.028  | 0.225  | 0.01   | 0.516  | 0.006  | 0.559  |
| 487 | pm18-pm29 | 0      | 0.678  | 0.022  | 0.204  | 0.034  | 0.217  |
| 488 | pm18-pm30 | -0.444 | <0.001 | -0.453 | <0.001 | -0.438 | <0.001 |
| 489 | pm18-pm31 | 0.013  | 0.343  | 0      | 0.913  | 0.036  | 0.291  |
| 490 | pm18-pm32 | 0.026  | 0.288  | 0.019  | 0.39   | 0.019  | 0.317  |
| 491 | pm18-pm33 | 0.018  | 0.312  | -0.011 | 0.379  | 0.02   | 0.4    |
| 492 | pm18-pm34 | 0.017  | 0.341  | 0.022  | 0.295  | 0.031  | 0.225  |
| 493 | pm18-pm35 | -0.484 | <0.001 | -0.487 | <0.001 | -0.46  | <0.001 |
| 494 | pm18-pm36 | 0.014  | 0.345  | 0.034  | 0.22   | 0.04   | 0.194  |
| 495 | pm18-pm37 | 0.031  | 0.254  | 0.02   | 0.208  | 0.032  | 0.283  |
| 496 | pm19-pm20 | -0.027 | 0.272  | -0.017 | 0.359  | -0.038 | 0.211  |
| 497 | pm19-pm21 | -0.362 | <0.001 | -0.375 | <0.001 | -0.346 | <0.001 |
| 498 | pm19-pm22 | 0.03   | 0.249  | 0.043  | 0.193  | 0.033  | 0.299  |

|     |           |        |        |        |        |        |        |
|-----|-----------|--------|--------|--------|--------|--------|--------|
| 499 | pm19-pm23 | 0.018  | 0.374  | -0.015 | 0.378  | 0      | 0.669  |
| 500 | pm19-pm24 | 0      | 0.865  | -0.008 | 0.509  | 0.019  | 0.331  |
| 501 | pm19-pm25 | -0.001 | 0.66   | 0.015  | 0.384  | 0.011  | 0.331  |
| 502 | pm19-pm26 | 0.002  | 0.618  | 0.004  | 0.873  | 0.022  | 0.296  |
| 503 | pm19-pm27 | 0.017  | 0.36   | 0.021  | 0.233  | 0.012  | 0.359  |
| 504 | pm19-pm28 | 0.002  | 0.791  | 0.014  | 0.33   | 0.014  | 0.399  |
| 505 | pm19-pm29 | -0.019 | 0.355  | -0.006 | 0.434  | 0.001  | 0.605  |
| 506 | pm19-pm30 | -0.013 | 0.312  | -0.027 | 0.221  | -0.027 | 0.249  |
| 507 | pm19-pm31 | -0.012 | 0.314  | 0.002  | 0.756  | -0.009 | 0.449  |
| 508 | pm19-pm32 | 0.009  | 0.436  | -0.011 | 0.304  | -0.011 | 0.398  |
| 509 | pm19-pm33 | -0.01  | 0.346  | -0.032 | 0.262  | 0.007  | 0.456  |
| 510 | pm19-pm34 | -0.551 | <0.001 | -0.536 | <0.001 | -0.552 | <0.001 |
| 511 | pm19-pm35 | 0.021  | 0.263  | 0.011  | 0.328  | 0.024  | 0.26   |
| 512 | pm19-pm36 | 0.007  | 0.441  | 0.006  | 0.474  | -0.019 | 0.365  |
| 513 | pm19-pm37 | -0.003 | 0.704  | 0.023  | 0.264  | 0.013  | 0.353  |
| 514 | pm20-pm21 | -0.349 | <0.001 | -0.355 | <0.001 | -0.385 | <0.001 |
| 515 | pm20-pm22 | 0.024  | 0.234  | 0.025  | 0.212  | 0.005  | 0.586  |
| 516 | pm20-pm23 | 0.014  | 0.345  | 0.035  | 0.299  | 0.04   | 0.219  |
| 517 | pm20-pm24 | 0.012  | 0.348  | 0.014  | 0.397  | 0.022  | 0.288  |
| 518 | pm20-pm25 | 0.02   | 0.22   | 0.015  | 0.368  | -0.008 | 0.415  |
| 519 | pm20-pm26 | 0.031  | 0.274  | -0.003 | 0.674  | 0.038  | 0.221  |
| 520 | pm20-pm27 | 0.022  | 0.231  | -0.003 | 0.669  | 0.033  | 0.238  |
| 521 | pm20-pm28 | 0.012  | 0.361  | 0.024  | 0.295  | -0.008 | 0.503  |
| 522 | pm20-pm29 | 0.004  | 0.739  | -0.044 | 0.178  | -0.013 | 0.324  |
| 523 | pm20-pm30 | -0.057 | 0.027  | -0.092 | 0.018  | -0.071 | 0.017  |
| 524 | pm20-pm31 | 0.008  | 0.422  | 0.031  | 0.277  | 0.026  | 0.292  |
| 525 | pm20-pm32 | 0.004  | 0.663  | -0.009 | 0.466  | -0.006 | 0.535  |
| 526 | pm20-pm33 | 0.037  | 0.259  | 0.013  | 0.375  | 0.007  | 0.427  |
| 527 | pm20-pm34 | -0.034 | 0.28   | -0.01  | 0.321  | -0.027 | 0.287  |
| 528 | pm20-pm35 | -0.016 | 0.353  | -0.026 | 0.293  | -0.022 | 0.22   |

|     |           |        |        |        |        |        |        |
|-----|-----------|--------|--------|--------|--------|--------|--------|
| 529 | pm20-pm36 | -0.009 | 0.487  | 0.017  | 0.379  | 0.01   | 0.367  |
| 530 | pm20-pm37 | -0.005 | 0.75   | -0.01  | 0.302  | 0.006  | 0.528  |
| 531 | pm21-pm22 | -0.067 | 0.045  | -0.067 | 0.033  | -0.086 | 0.015  |
| 532 | pm21-pm23 | -0.056 | 0.038  | -0.015 | 0.35   | -0.031 | 0.248  |
| 533 | pm21-pm24 | -0.041 | 0.193  | -0.053 | 0.034  | -0.022 | 0.213  |
| 534 | pm21-pm25 | -0.046 | 0.168  | -0.031 | 0.288  | -0.043 | 0.161  |
| 535 | pm21-pm26 | -0.079 | 0.011  | -0.058 | 0.027  | -0.086 | 0.016  |
| 536 | pm21-pm27 | -0.062 | 0.039  | -0.091 | 0.017  | -0.059 | 0.045  |
| 537 | pm21-pm28 | -0.032 | 0.293  | -0.056 | 0.044  | -0.042 | 0.161  |
| 538 | pm21-pm29 | -0.065 | 0.04   | -0.062 | 0.025  | -0.06  | 0.029  |
| 539 | pm21-pm30 | -0.077 | 0.012  | -0.099 | 0.011  | -0.086 | 0.019  |
| 540 | pm21-pm31 | -0.062 | 0.026  | -0.084 | 0.016  | -0.08  | 0.014  |
| 541 | pm21-pm32 | -0.062 | 0.039  | -0.095 | 0.013  | -0.083 | 0.015  |
| 542 | pm21-pm33 | -0.057 | 0.03   | -0.088 | 0.018  | -0.073 | 0.013  |
| 543 | pm21-pm34 | -0.039 | 0.268  | -0.075 | 0.013  | -0.077 | 0.012  |
| 544 | pm21-pm35 | -0.073 | 0.016  | -0.078 | 0.02   | -0.114 | 0.007  |
| 545 | pm21-pm36 | -0.098 | 0.013  | -0.083 | 0.017  | -0.072 | 0.019  |
| 546 | pm21-pm37 | -0.074 | 0.018  | -0.097 | 0.018  | -0.056 | 0.038  |
| 547 | pm22-pm23 | 0.004  | 0.689  | 0.015  | 0.379  | -0.001 | 0.895  |
| 548 | pm22-pm24 | -0.008 | 0.449  | -0.02  | 0.212  | 0.002  | 0.932  |
| 549 | pm22-pm25 | -0.012 | 0.359  | 0.018  | 0.365  | -0.01  | 0.525  |
| 550 | pm22-pm26 | 0.016  | 0.38   | 0.047  | 0.181  | 0.032  | 0.222  |
| 551 | pm22-pm27 | 0.045  | 0.173  | 0.037  | 0.208  | 0.018  | 0.328  |
| 552 | pm22-pm28 | 0.019  | 0.324  | 0.017  | 0.324  | 0.021  | 0.21   |
| 553 | pm22-pm29 | -0.019 | 0.32   | -0.001 | 0.781  | -0.019 | 0.301  |
| 554 | pm22-pm30 | -0.001 | 0.775  | -0.008 | 0.411  | -0.006 | 0.582  |
| 555 | pm22-pm31 | -0.453 | <0.001 | -0.467 | <0.001 | -0.435 | <0.001 |
| 556 | pm22-pm32 | -0.015 | 0.351  | -0.013 | 0.315  | -0.017 | 0.371  |
| 557 | pm22-pm33 | 0.007  | 0.413  | 0.006  | 0.509  | 0.021  | 0.239  |
| 558 | pm22-pm34 | 0.011  | 0.33   | -0.01  | 0.397  | 0.004  | 0.947  |

|     |           |        |        |        |        |        |        |
|-----|-----------|--------|--------|--------|--------|--------|--------|
| 559 | pm22-pm35 | 0.028  | 0.257  | 0.024  | 0.249  | -0.001 | 0.932  |
| 560 | pm22-pm36 | -0.004 | 0.843  | 0.021  | 0.217  | 0.005  | 0.693  |
| 561 | pm22-pm37 | -0.022 | 0.249  | 0.012  | 0.3    | -0.023 | 0.265  |
| 562 | pm23-pm24 | -0.481 | <0.001 | -0.451 | <0.001 | -0.473 | <0.001 |
| 563 | pm23-pm25 | -0.02  | 0.276  | -0.023 | 0.281  | -0.018 | 0.325  |
| 564 | pm23-pm26 | 0.016  | 0.313  | 0.024  | 0.223  | 0.02   | 0.372  |
| 565 | pm23-pm27 | 0.007  | 0.404  | 0.017  | 0.302  | 0.025  | 0.205  |
| 566 | pm23-pm28 | 0.01   | 0.366  | -0.005 | 0.446  | 0.035  | 0.235  |
| 567 | pm23-pm29 | 0.002  | 0.672  | 0.027  | 0.291  | 0.016  | 0.353  |
| 568 | pm23-pm30 | 0.029  | 0.225  | 0.034  | 0.219  | 0.019  | 0.335  |
| 569 | pm23-pm31 | 0.022  | 0.277  | 0.025  | 0.21   | 0.017  | 0.342  |
| 570 | pm23-pm32 | 0.008  | 0.51   | -0.011 | 0.32   | 0.004  | 0.819  |
| 571 | pm23-pm33 | -0.003 | 0.896  | -0.006 | 0.521  | 0.038  | 0.282  |
| 572 | pm23-pm34 | -0.024 | 0.21   | -0.035 | 0.233  | -0.017 | 0.319  |
| 573 | pm23-pm35 | 0.047  | 0.199  | 0.013  | 0.336  | 0.027  | 0.276  |
| 574 | pm23-pm36 | -0.011 | 0.377  | 0.026  | 0.265  | -0.01  | 0.35   |
| 575 | pm23-pm37 | 0.007  | 0.506  | 0.011  | 0.349  | 0.004  | 0.736  |
| 576 | pm24-pm25 | 0.01   | 0.431  | -0.01  | 0.56   | 0.002  | 0.984  |
| 577 | pm24-pm26 | -0.015 | 0.385  | 0.015  | 0.304  | -0.02  | 0.34   |
| 578 | pm24-pm27 | -0.019 | 0.337  | -0.023 | 0.234  | -0.012 | 0.347  |
| 579 | pm24-pm28 | -0.025 | 0.247  | -0.026 | 0.299  | -0.021 | 0.227  |
| 580 | pm24-pm29 | 0.004  | 0.92   | -0.006 | 0.405  | -0.011 | 0.389  |
| 581 | pm24-pm30 | 0.034  | 0.287  | 0.025  | 0.202  | 0.004  | 0.982  |
| 582 | pm24-pm31 | 0.035  | 0.252  | 0.037  | 0.222  | 0.031  | 0.248  |
| 583 | pm24-pm32 | -0.027 | 0.27   | 0.01   | 0.492  | 0.019  | 0.335  |
| 584 | pm24-pm33 | 0.001  | 0.78   | 0.007  | 0.422  | 0.027  | 0.284  |
| 585 | pm24-pm34 | -0.02  | 0.351  | 0.024  | 0.21   | -0.001 | 0.699  |
| 586 | pm24-pm35 | 0.024  | 0.293  | 0.017  | 0.304  | 0.023  | 0.288  |
| 587 | pm24-pm36 | -0.001 | 0.879  | -0.029 | 0.215  | 0.004  | 0.907  |
| 588 | pm24-pm37 | 0.014  | 0.383  | -0.007 | 0.454  | 0.007  | 0.577  |



|     |           |        |       |        |       |        |       |
|-----|-----------|--------|-------|--------|-------|--------|-------|
| 589 | pm25-pm26 | 0.022  | 0.201 | 0.021  | 0.288 | 0.018  | 0.376 |
| 590 | pm25-pm27 | -0.019 | 0.373 | -0.031 | 0.225 | 0.001  | 0.682 |
| 591 | pm25-pm28 | -0.015 | 0.339 | -0.029 | 0.255 | 0      | 0.679 |
| 592 | pm25-pm29 | -0.016 | 0.372 | 0.002  | 0.9   | 0.003  | 0.929 |
| 593 | pm25-pm30 | 0.026  | 0.215 | 0.033  | 0.252 | 0.019  | 0.354 |
| 594 | pm25-pm31 | 0.021  | 0.224 | -0.01  | 0.489 | 0.021  | 0.229 |
| 595 | pm25-pm32 | 0.008  | 0.547 | -0.007 | 0.465 | 0.021  | 0.221 |
| 596 | pm25-pm33 | -0.013 | 0.371 | 0.001  | 0.936 | 0.032  | 0.261 |
| 597 | pm25-pm34 | -0.026 | 0.288 | -0.012 | 0.305 | -0.029 | 0.264 |
| 598 | pm25-pm35 | 0.015  | 0.388 | -0.008 | 0.523 | 0.01   | 0.329 |
| 599 | pm25-pm36 | -0.011 | 0.365 | -0.019 | 0.382 | -0.017 | 0.376 |
| 600 | pm25-pm37 | -0.01  | 0.329 | 0.004  | 0.877 | -0.017 | 0.339 |
| 601 | pm26-pm27 | 0.011  | 0.367 | 0      | 0.777 | -0.005 | 0.905 |
| 602 | pm26-pm28 | 0.013  | 0.354 | -0.008 | 0.469 | 0.028  | 0.241 |
| 603 | pm26-pm29 | 0.03   | 0.262 | 0.014  | 0.306 | -0.013 | 0.354 |
| 604 | pm26-pm30 | 0.026  | 0.207 | 0.019  | 0.342 | 0.03   | 0.216 |
| 605 | pm26-pm31 | 0.014  | 0.31  | 0.043  | 0.15  | 0.004  | 0.895 |
| 606 | pm26-pm32 | 0.006  | 0.487 | -0.003 | 0.955 | -0.015 | 0.361 |
| 607 | pm26-pm33 | 0.007  | 0.494 | 0.033  | 0.208 | 0.042  | 0.167 |
| 608 | pm26-pm34 | -0.004 | 0.751 | 0.002  | 0.619 | 0.018  | 0.361 |
| 609 | pm26-pm35 | 0.005  | 0.533 | 0.033  | 0.3   | 0.011  | 0.352 |
| 610 | pm26-pm36 | -0.004 | 0.945 | -0.001 | 0.987 | -0.01  | 0.547 |
| 611 | pm26-pm37 | -0.019 | 0.396 | -0.014 | 0.374 | 0.009  | 0.545 |
| 612 | pm27-pm28 | 0.002  | 0.867 | 0.018  | 0.342 | 0.014  | 0.361 |
| 613 | pm27-pm29 | -0.008 | 0.587 | -0.031 | 0.253 | -0.041 | 0.171 |
| 614 | pm27-pm30 | 0.018  | 0.341 | 0.006  | 0.55  | 0.011  | 0.365 |
| 615 | pm27-pm31 | -0.026 | 0.216 | -0.041 | 0.191 | -0.04  | 0.192 |
| 616 | pm27-pm32 | -0.012 | 0.342 | -0.016 | 0.39  | -0.024 | 0.272 |
| 617 | pm27-pm33 | 0.011  | 0.363 | 0.012  | 0.324 | 0.012  | 0.386 |
| 618 | pm27-pm34 | 0.026  | 0.246 | 0.027  | 0.231 | 0.02   | 0.391 |

|     |           |        |       |        |       |        |       |
|-----|-----------|--------|-------|--------|-------|--------|-------|
| 619 | pm27-pm35 | -0.007 | 0.548 | 0.007  | 0.575 | 0.017  | 0.387 |
| 620 | pm27-pm36 | -0.002 | 0.893 | 0.013  | 0.365 | 0.01   | 0.461 |
| 621 | pm27-pm37 | -0.025 | 0.247 | 0.004  | 0.933 | -0.002 | 0.618 |
| 622 | pm28-pm29 | 0.018  | 0.377 | -0.023 | 0.223 | 0.02   | 0.265 |
| 623 | pm28-pm30 | 0.028  | 0.261 | 0.02   | 0.288 | 0      | 0.944 |
| 624 | pm28-pm31 | 0.037  | 0.221 | 0.029  | 0.296 | 0.039  | 0.219 |
| 625 | pm28-pm32 | 0.026  | 0.267 | -0.015 | 0.319 | 0.025  | 0.254 |
| 626 | pm28-pm33 | 0.02   | 0.237 | -0.006 | 0.499 | 0.006  | 0.463 |
| 627 | pm28-pm34 | -0.011 | 0.315 | -0.036 | 0.291 | -0.045 | 0.174 |
| 628 | pm28-pm35 | 0.016  | 0.4   | 0.025  | 0.286 | 0.011  | 0.365 |
| 629 | pm28-pm36 | 0.001  | 0.771 | -0.019 | 0.3   | 0.01   | 0.52  |
| 630 | pm28-pm37 | 0.032  | 0.26  | 0.027  | 0.296 | 0.028  | 0.207 |
| 631 | pm29-pm30 | 0.027  | 0.234 | 0.005  | 0.413 | 0.008  | 0.548 |
| 632 | pm29-pm31 | 0.023  | 0.284 | 0.033  | 0.298 | -0.005 | 0.535 |
| 633 | pm29-pm32 | 0.008  | 0.482 | 0.01   | 0.45  | 0.015  | 0.335 |
| 634 | pm29-pm33 | -0.001 | 0.854 | 0.014  | 0.386 | -0.003 | 0.967 |
| 635 | pm29-pm34 | -0.046 | 0.175 | -0.029 | 0.291 | -0.042 | 0.194 |
| 636 | pm29-pm35 | 0.017  | 0.336 | 0.045  | 0.156 | 0.023  | 0.202 |
| 637 | pm29-pm36 | 0.008  | 0.568 | -0.001 | 0.837 | 0.025  | 0.202 |
| 638 | pm29-pm37 | -0.025 | 0.207 | 0.011  | 0.361 | 0.014  | 0.301 |
| 639 | pm30-pm31 | 0.006  | 0.465 | 0.002  | 0.804 | -0.029 | 0.279 |
| 640 | pm30-pm32 | 0.011  | 0.377 | -0.003 | 0.686 | 0.019  | 0.362 |
| 641 | pm30-pm33 | -0.042 | 0.159 | -0.013 | 0.335 | -0.023 | 0.229 |
| 642 | pm30-pm34 | -0.009 | 0.56  | -0.032 | 0.29  | -0.038 | 0.203 |
| 643 | pm30-pm35 | 0.007  | 0.478 | 0.047  | 0.155 | 0.012  | 0.34  |
| 644 | pm30-pm36 | 0.027  | 0.208 | 0.003  | 0.816 | 0.001  | 0.942 |
| 645 | pm30-pm37 | 0.017  | 0.379 | -0.013 | 0.349 | -0.012 | 0.37  |
| 646 | pm31-pm32 | -0.004 | 0.752 | 0.009  | 0.465 | -0.001 | 0.691 |
| 647 | pm31-pm33 | 0.016  | 0.304 | 0.002  | 0.601 | 0.023  | 0.216 |
| 648 | pm31-pm34 | 0.003  | 0.781 | 0.01   | 0.361 | -0.001 | 0.923 |

|     |           |        |       |        |       |        |       |
|-----|-----------|--------|-------|--------|-------|--------|-------|
| 649 | pm31-pm35 | 0.048  | 0.166 | 0.009  | 0.539 | 0.036  | 0.2   |
| 650 | pm31-pm36 | 0.024  | 0.212 | -0.01  | 0.444 | -0.002 | 0.691 |
| 651 | pm31-pm37 | -0.171 | 0.001 | -0.159 | 0.003 | -0.151 | 0.005 |
| 652 | pm32-pm33 | 0.033  | 0.227 | 0.012  | 0.397 | 0.006  | 0.432 |
| 653 | pm32-pm34 | -0.003 | 0.873 | -0.025 | 0.206 | -0.006 | 0.442 |
| 654 | pm32-pm35 | -0.134 | 0.009 | -0.164 | 0.004 | -0.182 | 0.001 |
| 655 | pm32-pm36 | 0.009  | 0.522 | 0.014  | 0.379 | -0.01  | 0.595 |
| 656 | pm32-pm37 | 0      | 0.766 | -0.015 | 0.332 | 0.001  | 0.606 |
| 657 | pm33-pm34 | 0.003  | 0.747 | -0.002 | 0.944 | 0.016  | 0.312 |
| 658 | pm33-pm35 | 0.011  | 0.305 | 0.033  | 0.215 | 0.029  | 0.225 |
| 659 | pm33-pm36 | -0.03  | 0.296 | -0.002 | 0.677 | -0.038 | 0.223 |
| 660 | pm33-pm37 | -0.008 | 0.482 | 0.031  | 0.294 | -0.001 | 0.886 |
| 661 | pm34-pm35 | 0.006  | 0.59  | -0.02  | 0.364 | -0.02  | 0.355 |
| 662 | pm34-pm36 | 0.008  | 0.439 | -0.027 | 0.29  | -0.019 | 0.315 |
| 663 | pm34-pm37 | -0.012 | 0.363 | 0.006  | 0.431 | -0.006 | 0.463 |
| 664 | pm35-pm36 | -0.002 | 0.839 | -0.014 | 0.377 | 0.029  | 0.249 |
| 665 | pm35-pm37 | 0.017  | 0.393 | 0.025  | 0.244 | 0.013  | 0.39  |
| 666 | pm36-pm37 | -0.021 | 0.223 | -0.01  | 0.355 | 0.011  | 0.394 |

## References for Supplementary Information

1. Tyson JJ, Novak B. Functional motifs in biochemical reaction networks. *Annual review of physical chemistry*. 2010;61:219-40.
2. Alon U. *An introduction to systems biology: design principles of biological circuits*: CRC press; 2006.
3. Won JK, Yang HW, Shin SY, Lee JH, Heo WD, Cho KH. The crossregulation between ERK and PI3K signaling pathways determines the tumoricidal efficacy of MEK inhibitor. *J Mol Cell Biol*. 2012;4(3):153-63.
